# Supplementary material
Source: PubMed Central journal article supplement (PMC1885563)
Supplement: pnas_0701361104_1.pdf [file pnas_0701361104_1.pdf]

|     |                                                              |                                 |        |              |                            |
|-----|--------------------------------------------------------------|---------------------------------|--------|--------------|----------------------------|
| 518 | Fabry disease (3)                                            | GLA                             | 301500 | Xq22         | Metabolic                  |
| 519 | Facioscapulohumeral muscular dystrophy-1A (3)                | FSHMD1A, FSHD1A                 | 158900 | 4q35         | Muscular                   |
| 520 | Factor H and factor H-like 1 (3)                             | HF1, CFH, HUS                   | 134370 | 1q32         | Hematological              |
| 520 | Factor V and factor VIII, combined deficiency of, 227300 (3) | MCFD2                           | 607788 | 2p21-p16.3   | Hematological              |
| 520 | Factor VII deficiency (3)                                    | F7                              | 227500 | 13q34        | Hematological              |
| 520 | Factor X deficiency (3)                                      | F10                             | 227600 | 13q34        | Hematological              |
| 520 | Factor XI deficiency, autosomal dominant (3)                 | F11                             | 264900 | 4q35         | Hematological              |
| 520 | Factor XI deficiency, autosomal recessive (3)                | F11                             | 264900 | 4q35         | Hematological              |
| 520 | Factor XII deficiency (3)                                    | F12, HAF                        | 234000 | 5q33-qter    | Hematological              |
| 520 | Factor XIII A deficiency (3)                                 | F13A1, F13A                     | 134570 | 6p25-p24     | Hematological              |
| 520 | Factor XIII B deficiency (3)                                 | F13B                            | 134580 | 1q31-q32.1   | Hematological              |
| 522 | Familial Mediterranean fever, 249100 (3)                     | MEFV, MEF, FMF                  | 608107 | 16p13        | Immunological              |
| 523 | Fanconi anemia, complementation group A, 227650 (3)          | FANCA, FACA, FA1, FA, FAA       | 607139 | 16q24.3      | multiple                   |
| 523 | Fanconi anemia, complementation group B, 300514 (3)          | FAAP95, FAAP90, FLJ34064, FANCB | 300515 | Xp22.31      | multiple                   |
| 523 | Fanconi anemia, complementation group C (3)                  | FANCC, FACC                     | 227645 | 9q22.3       | multiple                   |
| 523 | Fanconi anemia, complementation group D1, 605724 (3)         | BRCA2, FANCD1                   | 600185 | 13q12.3      | multiple                   |
| 523 | Fanconi anemia, complementation group D2 (3)                 | FANCD2, FANCD, FACD, FAD        | 227646 | 3p25.3       | multiple                   |
| 523 | Fanconi anemia, complementation group E (3)                  | FANCE, FACE                     | 600901 | 6p22-p21     | multiple                   |
| 523 | Fanconi anemia, complementation group F (3)                  | FANCF                           | 603467 | 11p15        | multiple                   |
| 523 | Fanconi anemia, complementation group G (3)                  | XRCC9, FANCG                    | 602956 | 9p13         | multiple                   |
| 523 | Fanconi anemia, complementation group J, 609054 (3)          | BRIP1, BACH1, FANCI             | 605882 | 17q22        | multiple                   |
| 523 | Fanconi anemia, complementation group L (3)                  | PHF9, FANCL                     | 608111 | 2p16.1       | multiple                   |
| 523 | Fanconi anemia, complementation group M (3)                  | FANCM, KIAA1596                 | 609644 | 14q21.3      | multiple                   |
| 524 | Fanconi-Bickel syndrome, 227810 (3)                          | SLC2A2, GLUT2                   | 138160 | 3q26.1-q26.3 | Metabolic                  |
| 526 | Farber lipogranulomatosis (3)                                | ASAH, AC                        | 228000 | 8p22-p21.3   | Metabolic                  |
| 527 | Fatty liver, acute, of pregnancy (3)                         | HADHA, MTPA                     | 600890 | 2p23         | Metabolic                  |
| 528 | Favism (3)                                                   | G6PD, G6PD1                     | 305900 | Xq28         | Metabolic                  |
| 530 | Fechtner syndrome, 153640 (3)                                | MYH9, MHA, FTNS, DFNA17         | 160775 | 22q11.2      | multiple                   |
| 531 | Feingold syndrome, 164280 (3)                                | MYCN, NMYC, ODED, MODED         | 164840 | 2p24.1       | multiple                   |
| 532 | Fertile eunuch syndrome, 228300 (3)                          | GNRHR, LHRHR                    | 138850 | 4q21.2       | Endocrine                  |
| 535 | Fibrocalculous pancreatic diabetes, susceptibility to (3)    | SPINK1, PSTI, PCTT, TATI        | 167790 | 5q32         | Gastrointestinal           |
| 537 | Fibromatosis, gingival, 135300 (3)                           | SOS1, GINGF, GF1, HGF           | 182530 | 2p22-p21     | Connective tissue disorder |
| 537 | Fibromatosis, juvenile hyaline, 228600 (3)                   | ANTXR2, CMG2, JHF, ISH          | 608041 | 4q21         | Connective tissue disorder |
