# Supplementary material
Source: PubMed Central journal article supplement (PMC1885563)
Supplement: pnas_0701361104_3.pdf [file pnas_0701361104_3.pdf]

| Percentage of disorders in giant component |     |    |     |
|--------------------------------------------|-----|----|-----|
| Percentage of disorders in the HDN         |     |    |     |
| Average number of genes                    |     |    |     |
| CLASS                                      |     |    |     |
| Bone                                       | 1.8 | 80 | 63  |
| Cancer                                     | 3.1 | 88 | 89  |
| Cardiovascular                             | 2.8 | 80 | 82  |
| Connective tissue                          | 2.1 | 71 | 75  |
| Dermatological                             | 2.2 | 77 | 57  |
| Developmental                              | 1.5 | 63 | 35  |
| Ear,Nose,Throat                            | 7.7 | 83 | 60  |
| Endocrine                                  | 2.2 | 71 | 68  |
| Gastrointestinal                           | 1.7 | 61 | 29  |
| Hematological                              | 2.2 | 76 | 51  |
| Immunological                              | 1.9 | 57 | 62  |
| Metabolic                                  | 1.5 | 43 | 34  |
| Muscular                                   | 2.8 | 71 | 68  |
| Neurological                               | 2.6 | 67 | 71  |
| Nutritional                                | 6.0 | 75 | 100 |
| Ophthalmological                           | 2.7 | 77 | 81  |
| Psychiatric                                | 2.1 | 53 | 89  |
| Renal                                      | 1.8 | 61 | 36  |
| Respiratory                                | 2.8 | 92 | 33  |
| Skeletal                                   | 1.3 | 83 | 43  |
| Multiple                                   | 1.6 | 71 | 49  |
