# Supplementary material
Source: PubMed Central journal article supplement (PMC1885563)

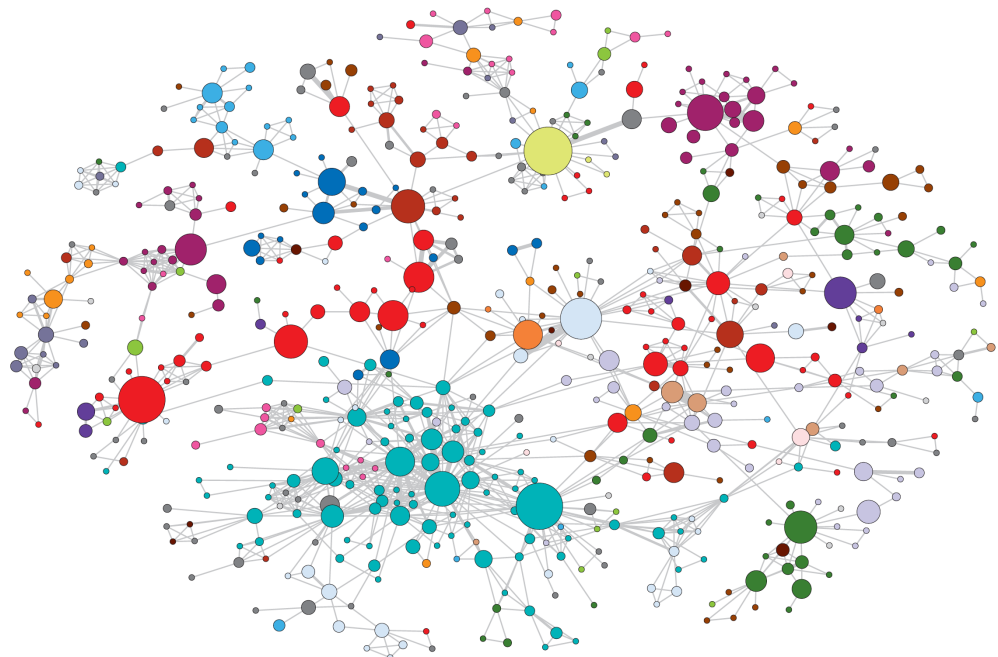

- Bone
- Cancer
- Cardiovascular
- Connective\_tissue\_disorder
- Dermatological
- Developmental
- Ear,Nose,Throat
- Endocrine
- Gastrointestinal
- Hematological
- Immunological
- Metabolic
- Muscular
- Neurological
- Nutritional
- Ophthalmological
- Psychiatric
- Renal
- Respiratory
- Skeletal
- multiple
- Unclassified

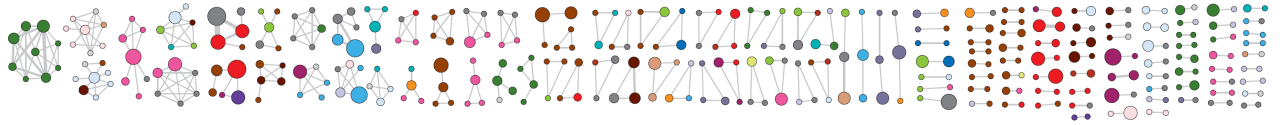

Supplement: pnas_0701361104_7.pdf [file pnas_0701361104_7.pdf]
