# Supplementary material
Source: PubMed Central journal article supplement (PMC1885563)
Supplement: pnas_0701361104_11.pdf [file pnas_0701361104_11.pdf]

Supporting Information Table 2. Network characteristics of diseases.

| Disease ID | Name                                                   | Disorder class   | Size (s) | Degree (k) | Class-degree ( $\kappa$ ) | Genes implicated (Entrez ID) [comma-delimited]                                   |
|------------|--------------------------------------------------------|------------------|----------|------------|---------------------------|----------------------------------------------------------------------------------|
| 1          | 17,20-lyase_deficiency                                 | Endocrine        | 1        | 0          | 0                         | CYP17A1 (1586)                                                                   |
| 3          | 2-methyl-3-hydroxybutyryl-CoA_dehydrogenase_deficiency | Metabolic        | 1        | 0          | 0                         | HADH2 (3028)                                                                     |
| 4          | 2-methylbutyrylglycinuria                              | Metabolic        | 1        | 0          | 0                         | ACADSB (36)                                                                      |
| 5          | 3-beta-hydroxysteroid_dehydrogenase_type_II_deficiency | Metabolic        | 1        | 0          | 0                         | HSD3B2 (3284)                                                                    |
| 6          | 3-hydroxyacyl-CoA_dehydrogenase_deficiency             | Metabolic        | 1        | 0          | 0                         | HADHSC (3033)                                                                    |
| 7          | 3-Methylcrotonyl-CoA_carboxylase_deficiency            | Metabolic        | 2        | 0          | 0                         | MCCC1 (56922), MCCC2 (64087)                                                     |
| 8          | 3-methylglutaconic_aciduria                            | Metabolic        | 1        | 0          | 0                         | AUH (549)                                                                        |
| 9          | 3-methylglutaconicaciduria                             | Metabolic        | 1        | 1          | 1                         | OPA3 (80207)                                                                     |
| 10         | 3-M_syndrome                                           | multiple         | 1        | 0          | 0                         | CUL7 (9820)                                                                      |
| 12         | 6-mercaptopurine_sensitivity                           | Metabolic        | 1        | 0          | 0                         | TPMT (7172)                                                                      |
| 13         | Aarskog-Scott_syndrome                                 | multiple         | 1        | 1          | 1                         | FGD1 (2245)                                                                      |
| 14         | Abacavir_hypersensitivity                              | Immunological    | 1        | 2          | 2                         | HLA-B (3106)                                                                     |
| 15         | ABCD_syndrome                                          | multiple         | 1        | 2          | 1                         | EDNRB (1910)                                                                     |
| 17         | Abetalipoproteinemia                                   | Metabolic        | 2        | 2          | 1                         | MTP (4547), APOB (338)                                                           |
| 18         | Acampomelic_campolelic_dysplasia                       | Skeletal         | 1        | 1          | 1                         | SOX9 (6662)                                                                      |
| 21         | Acatlasemia                                            | Hematological    | 1        | 0          | 0                         | CAT (847)                                                                        |
| 22         | Accelerated_tumor_formation                            | Cancer           | 1        | 0          | 0                         | MDM2 (4193)                                                                      |
| 24         | Achalasia-addisonianism-alacrimia_syndrome             | multiple         | 1        | 0          | 0                         | AAAS (8086)                                                                      |
| 25         | Acheiropody                                            | Skeletal         | 1        | 0          | 0                         | LMBR1 (64327)                                                                    |
| 26         | Achondrogenesis-hypochondrogenesis_type_II             | Bone             | 1        | 5          | 3                         | COL2A1 (1280)                                                                    |
| 27         | Achondrogenesis_lb                                     | Bone             | 1        | 3          | 3                         | SLC26A2 (1836)                                                                   |
| 28         | Achondroplasia                                         | Skeletal         | 1        | 7          | 2                         | FGFR3 (2261)                                                                     |
| 29         | Achromatopsia                                          | Ophthalmological | 3        | 1          | 1                         | CNGA3 (1261), CNGB3 (54714), GNAT2 (2780)                                        |
| 30         | Acid-labile_subunit_deficiency_of                      | Endocrine        | 1        | 0          | 0                         | IGFALS (3483)                                                                    |
| 31         | Acquired_long_QT_syndrome                              | Cardiovascular   | 1        | 1          | 1                         | KCNH2 (3757)                                                                     |
| 32         | Acrocallosal_syndrome                                  | multiple         | 1        | 3          | 1                         | GLI3 (2737)                                                                      |
| 33         | Acrocapitofemoral_dysplasia                            | Skeletal         | 1        | 1          | 1                         | IHH (3549)                                                                       |
| 34         | Acrodermatitis_enteropathica                           | Dermatological   | 1        | 0          | 0                         | SLC39A4 (55630)                                                                  |
| 36         | Acrokeratosis_verruciformis                            | Dermatological   | 1        | 1          | 1                         | ATP2A2 (488)                                                                     |
| 38         | Acromegaly                                             | Endocrine        | 2        | 5          | 3                         | GNAS (2778), SSTR5 (6755)                                                        |
| 39         | Acromesomelic_dysplasia                                | Skeletal         | 2        | 3          | 1                         | GDF5 (8200), NPR2 (4882)                                                         |
| 44         | Acyl-CoA_dehydrogenase_deficiency_of                   | Metabolic        | 3        | 0          | 0                         | ACADL (33), ACADM (34), ACADS (35)                                               |
| 45         | Adenocarcinoma                                         | Cancer           | 4        | 8          | 3                         | EGFR (1956), BRAF (673), ERBB2 (2064), PARK2 (5071)                              |
| 46         | Adenoma_periampullary                                  | Cancer           | 1        | 6          | 1                         | APC (324)                                                                        |
| 47         | Adenomas                                               | Cancer           | 3        | 6          | 1                         | MUTYH (4595), PLAG1 (5324), APC (324)                                            |
| 49         | Adenosine_deaminase_deficiency                         | Immunological    | 1        | 1          | 1                         | ADA (100)                                                                        |
| 50         | Adenylosuccinase_deficiency                            | Metabolic        | 1        | 0          | 0                         | ADSL (158)                                                                       |
| 52         | Adiponectin_deficiency                                 | Endocrine        | 1        | 0          | 0                         | ADIPOQ (9370)                                                                    |
| 53         | Adrenal_hyperplasia_congenital                         | Endocrine        | 4        | 5          | 3                         | CYP11B1 (1584), CYP21A2 (1589), POR (5447), NR0B1 (190)                          |
| 54         | Adrenocortical_carcinoma                               | Cancer           | 1        | 4          | 2                         | PRKAR1A (5573)                                                                   |
| 55         | Adrenocorticotrophic_hormone_deficiency                | Endocrine        | 1        | 0          | 0                         | TBX19 (9095)                                                                     |
| 56         | Adrenoleukodystrophy                                   | Neurological     | 6        | 3          | 2                         | ABCD1 (215), PEX10 (5192), PEX13 (5194), PEX1 (5189), PEX26 (55670), PEX5 (5830) |
| 57         | Adrenomyeloneuropathy                                  | Metabolic        | 1        | 1          | 1                         | ABCD1 (215)                                                                      |
| 58         | Adult_i_phenotype                                      | Hematological    | 1        | 1          | 1                         | GCNT2 (2651)                                                                     |

|     |                                                              |                  |    |    |   |                                                                                                                                                       |
|-----|--------------------------------------------------------------|------------------|----|----|---|-------------------------------------------------------------------------------------------------------------------------------------------------------|
| 59  | ADULT_syndrome                                               | multiple         | 1  | 5  | 1 | TP73L (8626)                                                                                                                                          |
| 60  | Advanced_sleep_phase_syndrome                                | Neurological     | 1  | 0  | 0 | PER2 (8864)                                                                                                                                           |
| 61  | Afibrinogenemia                                              | Hematological    | 2  | 3  | 2 | FGA (2243), FGB (2244)                                                                                                                                |
| 63  | Agammaglobulinemia                                           | Hematological    | 4  | 1  | 1 | IGHM (3507), IGLL1 (3543), LRRC8A (56262), BTK (695)                                                                                                  |
| 64  | AGAT_deficiency                                              | Metabolic        | 1  | 0  | 0 | GATM (2628)                                                                                                                                           |
| 65  | Agenesis_of_the_corpus_callosum_with_peripheral_neuro_pathy  | Neurological     | 1  | 0  | 0 | SLC12A6 (9990)                                                                                                                                        |
| 69  | AICA-ribosiduria_due_to_ATIC_deficiency                      | Metabolic        | 1  | 0  | 0 | ATIC (471)                                                                                                                                            |
| 70  | AIDS                                                         | Immunological    | 3  | 3  | 2 | KIR3DL1 (3811), IFNG (3458), CXCL12 (6387)                                                                                                            |
| 71  | Alagille_syndrome                                            | multiple         | 1  | 2  | 2 | JAG1 (182)                                                                                                                                            |
| 72  | Albinism                                                     | Dermatological   | 3  | 1  | 0 | OCA2 (4948), TYR (7299), TYRP1 (7306)                                                                                                                 |
| 74  | Alcohol_dependence                                           | Unclassified     | 1  | 4  | 2 | HTR2A (3356)                                                                                                                                          |
| 75  | Alcoholism                                                   | Unclassified     | 1  | 0  | 0 | GABRA2 (2555)                                                                                                                                         |
| 76  | Aldolase_A_deficiency                                        | Metabolic        | 1  | 0  | 0 | ALDOA (226)                                                                                                                                           |
| 77  | Aldosterone_to_renin_ratio_raised                            | Endocrine        | 1  | 2  | 2 | CYP11B2 (1585)                                                                                                                                        |
| 78  | Aldosteronism                                                | Endocrine        | 1  | 1  | 1 | CYP11B1 (1584)                                                                                                                                        |
| 79  | Alexander_disease                                            | multiple         | 2  | 2  | 1 | GFAP (2670), NDUFV1 (4723)                                                                                                                            |
| 80  | Alkaptonuria                                                 | Metabolic        | 1  | 0  | 0 | HGD (3081)                                                                                                                                            |
| 82  | Allan-Herndon-Dudley_syndrome                                | Neurological     | 1  | 0  | 0 | SLC16A2 (6567)                                                                                                                                        |
| 83  | Allergic_rhinitis                                            | Immunological    | 1  | 1  | 1 | IL13 (3596)                                                                                                                                           |
| 85  | Alopecia_universalis                                         | Dermatological   | 1  | 1  | 1 | HR (55806)                                                                                                                                            |
| 86  | Alpers_syndrome                                              | Neurological     | 1  | 2  | 1 | POLG (5428)                                                                                                                                           |
| 87  | Alpha-1-antichymotrypsin_deficiency                          | Respiratory      | 1  | 1  | 1 | SERPINA3 (12)                                                                                                                                         |
| 88  | Alpha-actinin-3_deficiency                                   | Muscular         | 1  | 1  | 1 | ACTN3 (89)                                                                                                                                            |
| 90  | Alpha-methylacetoacetic_aciduria                             | Metabolic        | 1  | 0  | 0 | ACAT1 (38)                                                                                                                                            |
| 91  | Alpha-methylacyl-CoA_racemase_deficiency                     | Metabolic        | 1  | 0  | 0 | AMACR (23600)                                                                                                                                         |
| 92  | Alpha-thalassemia/mental_retardation_syndrome                | Hematological    | 1  | 4  | 0 | ATRX (546)                                                                                                                                            |
| 94  | Alport_syndrome                                              | Renal            | 3  | 1  | 1 | COL4A5 (1287), COL4A3 (1285), COL4A4 (1286)                                                                                                           |
| 95  | (null)                                                       | Neurological     | 1  | 0  | 0 | ALMS1 (7840)                                                                                                                                          |
| 96  | Alternating_hemiplegia_of_childhood                          | Neurological     | 1  | 1  | 1 | ATP1A2 (477)                                                                                                                                          |
| 97  | Alveolar_soft-part_sarcoma                                   | Cancer           | 1  | 0  | 0 | ASPSCR1 (79058)                                                                                                                                       |
| 98  | Alzheimer_disease                                            | Neurological     | 12 | 15 | 9 | APP (351), APOE (348), PSEN2 (5664), APBB2 (323), NOS3 (4846), PLAU (5328), ACE (1636), MPO (4353), PAXIP1 (22976), A2M (2), BLMH (642), PSEN1 (5663) |
| 99  | Amelogenesis_imperfecta                                      | Bone             | 4  | 2  | 1 | ENAM (10117), AMELX (265), DLX3 (1747), KLK4 (9622)                                                                                                   |
| 100 | Amish_infantile_epilepsy_syndrome                            | Neurological     | 1  | 0  | 0 | ST3GAL5 (8869)                                                                                                                                        |
| 101 | AMP_deaminase_deficiency                                     | Hematological    | 1  | 0  | 0 | AMPD3 (272)                                                                                                                                           |
| 102 | Amyloid_neuropathy                                           | Neurological     | 1  | 3  | 3 | TTR (7276)                                                                                                                                            |
| 103 | Amyloidosis                                                  | Neurological     | 6  | 11 | 6 | APOA1 (335), APP (351), GSN (2934), FGA (2243), LYZ (4069), TTR (7276)                                                                                |
| 104 | Amyotrophic_lateral_sclerosis                                | Neurological     | 6  | 4  | 2 | VAPB (9217), SOD1 (6647), ALS2 (57679), DCTN1 (1639), NEFH (4744), PRPH (5630)                                                                        |
| 105 | Analbuminemia                                                | Hematological    | 1  | 1  | 1 | ALB (213)                                                                                                                                             |
| 107 | Analgesia_from_kappa-opioid_receptor_agonist_female-specific | Unclassified     | 1  | 3  | 2 | MC1R (4157)                                                                                                                                           |
| 108 | Anderson_disease                                             | Gastrointestinal | 1  | 1  | 1 | SAR1B (51128)                                                                                                                                         |
| 109 | Androgen_insensitivity                                       | Endocrine        | 1  | 4  | 3 | AR (367)                                                                                                                                              |
| 110 | Anemia                                                       | Hematological    | 9  | 3  | 1 | CDAN1 (146059), RPS19 (6223), PKLR (5313), NT5C3 (51251), RHAG (6005), SLC11A2 (4891), SPTB (6710), ALAS2 (212), ABCB7 (22)                           |

|     |                                                       |                            |    |    |   |                                                                                                                                                                                           |
|-----|-------------------------------------------------------|----------------------------|----|----|---|-------------------------------------------------------------------------------------------------------------------------------------------------------------------------------------------|
| 113 | Angelman_syndrome                                     | Developmental              | 2  | 4  | 2 | MECP2 (4204), UBE3A (7337)                                                                                                                                                                |
| 114 | Angioedema                                            | Immunological              | 2  | 0  | 0 | SERPING1 (710), XPNPEP2 (7512)                                                                                                                                                            |
| 115 | Angiofibroma_sporadic                                 | Endocrine                  | 1  | 7  | 2 | MEN1 (4221)                                                                                                                                                                               |
| 117 | Angiotensin_I-converting_enzyme                       | Endocrine                  | 1  | 5  | 5 | ACE (1636)                                                                                                                                                                                |
| 118 | Anhaptoglobinemia                                     | Hematological              | 1  | 1  | 1 | HP (3240)                                                                                                                                                                                 |
| 119 | Aniridia_type_II                                      | Ophthalmological           | 1  | 9  | 3 | PAX6 (5080)                                                                                                                                                                               |
| 121 | Ankylosing_spodylitis                                 | Connective_tissue_disorder | 1  | 2  | 2 | HLA-B (3106)                                                                                                                                                                              |
| 122 | Anophthalmia                                          | Ophthalmological           | 1  | 0  | 0 | SOX2 (6657)                                                                                                                                                                               |
| 124 | Anorexia_nervosa                                      | Nutritional                | 1  | 4  | 2 | HTR2A (3356)                                                                                                                                                                              |
| 126 | Anterior_segment_anomalies_and_cataract               | Ophthalmological           | 4  | 6  | 2 | EYA1 (2138), FOXE3 (2301), FOXC1 (2296), PITX3 (5309)                                                                                                                                     |
| 127 | Antithrombin_III_deficiency                           | Hematological              | 1  | 0  | 0 | SERPINC1 (462)                                                                                                                                                                            |
| 128 | Antley-Bixler_syndrome                                | Unclassified               | 1  | 2  | 2 | POR (5447)                                                                                                                                                                                |
| 129 | Anxiety-related_personality_traits                    | Psychiatric                | 1  | 1  | 1 | SLC6A4 (6532)                                                                                                                                                                             |
| 130 | Aortic_aneurysm                                       | Cardiovascular             | 1  | 5  | 2 | FBN1 (2200)                                                                                                                                                                               |
| 131 | Apert_syndrome                                        | Connective_tissue_disorder | 1  | 8  | 3 | FGFR2 (2263)                                                                                                                                                                              |
| 132 | Aplasia_of_lacrimal_and_salivary_glands               | Gastrointestinal           | 1  | 0  | 0 | FGF10 (2255)                                                                                                                                                                              |
| 133 | Aplastic_anemia                                       | Hematological              | 3  | 4  | 3 | IFNG (3458), TERC (7012), TERT (7015)                                                                                                                                                     |
| 134 | Apnea_postanesthetic                                  | Unclassified               | 1  | 0  | 0 | BCHE (590)                                                                                                                                                                                |
| 136 | Apolipoprotein_deficiency                             | Metabolic                  | 4  | 5  | 3 | APOA1 (335), APOA2 (336), APOC3 (345), APOH (350)                                                                                                                                         |
| 137 | Apparent_mineralocorticoid_excess_hypertension_due_to | Bone                       | 1  | 1  | 1 | HSD11B2 (3291)                                                                                                                                                                            |
| 138 | Aquaporin-1_deficiency                                | Unclassified               | 1  | 1  | 1 | AQP1 (358)                                                                                                                                                                                |
| 139 | ARC_syndrome                                          | Gastrointestinal           | 1  | 0  | 0 | VPS33B (26276)                                                                                                                                                                            |
| 140 | Argininemia                                           | Metabolic                  | 2  | 0  | 0 | ARG1 (383), ASL (435)                                                                                                                                                                     |
| 142 | Aromatase_deficiency                                  | Metabolic                  | 1  | 1  | 1 | CYP19A1 (1588)                                                                                                                                                                            |
| 143 | Aromatic_L-amino_acid_decarboxylase_deficiency        | Metabolic                  | 1  | 0  | 0 | DDC (1644)                                                                                                                                                                                |
| 144 | Arrhythmogenic_right_ventricular_dysplasia            | Cardiovascular             | 3  | 5  | 2 | RYR2 (6262), DSP (1832), PKP2 (5318)                                                                                                                                                      |
| 146 | Arthrogryposis                                        | Developmental              | 3  | 1  | 1 | TPM2 (7169), TNNI2 (7136), TNNT3 (7140)                                                                                                                                                   |
| 147 | Arthropathy                                           | Bone                       | 1  | 1  | 1 | WISP3 (8838)                                                                                                                                                                              |
| 150 | Aspartylglucosaminuria                                | Metabolic                  | 1  | 0  | 0 | AGA (175)                                                                                                                                                                                 |
| 151 | Asperger_syndrome                                     | Psychiatric                | 2  | 2  | 2 | NLGN3 (54413), NLGN4X (57502)                                                                                                                                                             |
| 153 | Asthma                                                | Respiratory                | 13 | 11 | 6 | PHF11 (51131), MS4A2 (2206), ALOX5 (240), ADRB2 (154), PTGDR (5729), GPR154 (387129), HNMT (3176), IL12B (3593), IL13 (3596), PLA2G7 (7941), SCGB3A2 (117156), TNF (7124), SCGB1A1 (7356) |
| 154 | Ataxia                                                | Neurological               | 5  | 1  | 1 | ATCAY (85300), APTX (54840), CACNB4 (785), ALS4 (23064), TTPA (7274)                                                                                                                      |
| 157 | Ataxia-telangiectasia                                 | Immunological              | 2  | 3  | 1 | ATM (472), MRE11A (4361)                                                                                                                                                                  |
| 160 | Atelosteogenesis                                      | Connective_tissue_disorder | 2  | 5  | 2 | SLC26A2 (1836), FLNB (2317)                                                                                                                                                               |
| 162 | Athabaskan_brainstem_dysgenesis_syndrome              | Neurological               | 1  | 1  | 1 | HOXA1 (3198)                                                                                                                                                                              |
| 163 | Atherosclerosis                                       | Cardiovascular             | 1  | 1  | 1 | ALOX5 (240)                                                                                                                                                                               |
| 164 | Atopy                                                 | Immunological              | 5  | 3  | 3 | SPINK5 (11005), HAVCR1 (26762), PLA2G7 (7941), SELP (6403), IL4R (3566)                                                                                                                   |
| 165 | Atransferrinemia                                      | Hematological              | 1  | 1  | 1 | TF (7018)                                                                                                                                                                                 |
| 166 | Atrial_fibrillation                                   | Cardiovascular             | 5  | 5  | 1 | KCNE2 (9992), KCNQ1 (3784), GATA4 (2626), MYH6 (4624), NKX2-5 (1482)                                                                                                                      |
| 167 | Atrichia_with_papular_lesions                         | Dermatological             | 1  | 1  | 1 | HR (55806)                                                                                                                                                                                |

|     |                                                    |                  |    |    |                                                                                                                                                                                                                                                                                                      |
|-----|----------------------------------------------------|------------------|----|----|------------------------------------------------------------------------------------------------------------------------------------------------------------------------------------------------------------------------------------------------------------------------------------------------------|
| 168 | Atrioventricular_block                             | Cardiovascular   | 3  | 5  | 2 NKX2-5 (1482), GJA1 (2697), CRELD1 (78987)                                                                                                                                                                                                                                                         |
| 171 | Attention-deficit_hyperactivity_disorder           | Psychiatric      | 1  | 2  | 2 DRD5 (1816)                                                                                                                                                                                                                                                                                        |
| 173 | Autism                                             | Psychiatric      | 4  | 5  | 3 GLO1 (2739), MEC2 (4204), NLGN3 (54413), NLGN4X (57502)                                                                                                                                                                                                                                            |
| 174 | Autoimmune_disease                                 | Immunological    | 4  | 4  | 1 FAS (355), CASP10 (843), CASP8 (841), AIRE (326)                                                                                                                                                                                                                                                   |
| 175 | Autonomic_nervous_system_dysfunction               | Psychiatric      | 1  | 0  | 0 DRD4 (1815)                                                                                                                                                                                                                                                                                        |
| 177 | Axenfeld_anomaly                                   | Ophthalmological | 1  | 4  | 1 FOXC1 (2296)                                                                                                                                                                                                                                                                                       |
| 178 | Azoospermia                                        | Endocrine        | 2  | 0  | 0 USP9Y (8287), SYCP3 (50511)                                                                                                                                                                                                                                                                        |
| 180 | Bamforth-Lazarus_syndrome                          | Endocrine        | 1  | 0  | 0 FOXE1 (2304)                                                                                                                                                                                                                                                                                       |
| 182 | Bannayan-Riley-Ruvalcaba_syndrome                  | Unclassified     | 1  | 8  | 1 PTEN (5728)                                                                                                                                                                                                                                                                                        |
| 183 | Bardet-Biedl_syndrome                              | multiple         | 8  | 1  | 1 BBS1 (582), ARL6 (84100), BBS7 (55212), BBS2 (583), BBS4 (585), BBS5 (129880), MKKS (8195), TTC8 (123016)                                                                                                                                                                                          |
| 184 | Bare_lymphocyte_syndrome                           | Immunological    | 5  | 3  | 3 TAPBP (6892), TAP2 (6891), CIITA (4261), RFX5 (5993), RFXAP (5994)                                                                                                                                                                                                                                 |
| 185 | Barth_syndrome                                     | multiple         | 1  | 2  | 1 TAZ (6901)                                                                                                                                                                                                                                                                                         |
| 186 | Bart-Pumphrey_syndrome                             | multiple         | 1  | 5  | 2 GJB2 (2706)                                                                                                                                                                                                                                                                                        |
| 187 | Barter_syndrome                                    | multiple         | 5  | 0  | 0 SLC12A1 (6557), KCNJ1 (3758), CLCNKB (1188), BSND (7809), CLCNKA (1187)                                                                                                                                                                                                                            |
| 188 | Basal_cell_carcinoma                               | Cancer           | 4  | 5  | 3 RASA1 (5921), PTCH2 (8643), PTCH (5727), SMO (6608)                                                                                                                                                                                                                                                |
| 190 | B-cell_non-Hodgkin_lymphoma,_high-grade            | Cancer           | 1  | 0  | 0 BCL7A (605)                                                                                                                                                                                                                                                                                        |
| 191 | BCG_infection                                      | Immunological    | 1  | 3  | 2 IFNGR1 (3459)                                                                                                                                                                                                                                                                                      |
| 192 | Beare-Stevenson_cutis_gyrata_syndrome              | multiple         | 1  | 8  | 4 FGFR2 (2263)                                                                                                                                                                                                                                                                                       |
| 193 | Becker_muscular_dystrophy                          | Muscular         | 2  | 3  | 2 DMD (1756), MYF6 (4618)                                                                                                                                                                                                                                                                            |
| 194 | Beckwith-Wiedemann_syndrome                        | multiple         | 4  | 2  | 1 CDKN1C (1028), H19 (283120), KCNQ1OT1 (10984), NSD1 (64324)                                                                                                                                                                                                                                        |
| 195 | Benzene_toxicity                                   | Unclassified     | 1  | 1  | 1 NQO1 (1728)                                                                                                                                                                                                                                                                                        |
| 196 | Bernard-Soulier_syndrome                           | Hematological    | 3  | 1  | 1 GP1BA (2811), GP1BB (2812), GP9 (2815)                                                                                                                                                                                                                                                             |
| 197 | Beryllium_disease,_chronic                         | Unclassified     | 1  | 0  | 0 HLA-DPB1 (3115)                                                                                                                                                                                                                                                                                    |
| 198 | Beta-2-adrenoreceptor_agonist,_reduced_response_to | Unclassified     | 1  | 2  | 2 ADRB2 (154)                                                                                                                                                                                                                                                                                        |
| 199 | Beta-ureidopropionase_deficiency                   | Metabolic        | 1  | 0  | 0 UPB1 (51733)                                                                                                                                                                                                                                                                                       |
| 200 | Bethlem_myopathy                                   | Muscular         | 3  | 1  | 1 COL6A1 (1291), COL6A2 (1292), COL6A3 (1293)                                                                                                                                                                                                                                                        |
| 201 | Bietti_crystalline_corneoretinal_dystrophy         | Ophthalmological | 1  | 0  | 0 CYP4V2 (285440)                                                                                                                                                                                                                                                                                    |
| 202 | Bile_acid_malabsorption,_primary                   | Gastrointestinal | 1  | 0  | 0 SLC10A2 (6555)                                                                                                                                                                                                                                                                                     |
| 203 | Biotinidase_deficiency                             | Metabolic        | 1  | 0  | 0 BTD (686)                                                                                                                                                                                                                                                                                          |
| 204 | Bipolar_disorder                                   | Psychiatric      | 1  | 0  | 0 XBP1 (7494)                                                                                                                                                                                                                                                                                        |
| 205 | Birt-Hogg-Dube_syndrome                            | Dermatological   | 1  | 3  | 2 FLCN (201163)                                                                                                                                                                                                                                                                                      |
| 207 | Bladder_cancer                                     | Cancer           | 4  | 15 | 2 FGFR3 (2261), KRAS (3845), RB1 (5925), HRAS (3265)                                                                                                                                                                                                                                                 |
| 208 | Blau_syndrome                                      | multiple         | 1  | 3  | 3 CARD15 (64127)                                                                                                                                                                                                                                                                                     |
| 209 | Bleeding_disorder                                  | Hematological    | 2  | 0  | 0 TBXA2R (6915), P2RX1 (5023)                                                                                                                                                                                                                                                                        |
| 210 | Blepharophimosis_epicanthus_inversus_and_ptosis    | multiple         | 1  | 1  | 1 FOXL2 (668)                                                                                                                                                                                                                                                                                        |
| 211 | Blepharospasm                                      | Ophthalmological | 1  | 2  | 2 DRD5 (1816)                                                                                                                                                                                                                                                                                        |
| 212 | Blood_group                                        | Hematological    | 23 | 8  | 4 ABO (28), LU (4059), AQP1 (358), DAF (1604), SLC4A1 (6521), DO (420), GYPC (2995), AQP3 (360), GCNT2 (2651), CD44 (960), KEL (3792), SLC14A1 (6563), CR1 (1378), ICAM4 (3386), FUT3 (2525), GYPA (2993), BSG (682), A4GALT (53947), B3GALT3 (8706), RHCE (6006), GYPB (2994), XG (7499), ACHE (43) |
| 213 | Bloom_syndrome                                     | Cancer           | 1  | 0  | 0 BLM (641)                                                                                                                                                                                                                                                                                          |
| 214 | Blue-cone_monochromacy                             | Ophthalmological | 2  | 1  | 1 OPN1LW (5956), OPN1MW (2652)                                                                                                                                                                                                                                                                       |
| 216 | Bombay_phenotype                                   | Hematological    | 2  | 1  | 1 FUT1 (2523), FUT2 (2524)                                                                                                                                                                                                                                                                           |

|     |                                                                                  |                            |    |    |   |                                                                                                                                                                                                                                                                                                                                           |
|-----|----------------------------------------------------------------------------------|----------------------------|----|----|---|-------------------------------------------------------------------------------------------------------------------------------------------------------------------------------------------------------------------------------------------------------------------------------------------------------------------------------------------|
| 217 | Bone_mineral_density_variability                                                 | Bone                       | 1  | 6  | 3 | LRP5 (4041)                                                                                                                                                                                                                                                                                                                               |
| 218 | Borjeson-Forssman-Lehmann_syndrome                                               | multiple                   | 1  | 0  | 0 | PHF6 (84295)                                                                                                                                                                                                                                                                                                                              |
| 220 | Bosley-Salih-Alorainy_syndrome                                                   | Neurological               | 1  | 1  | 1 | HOXA1 (3198)                                                                                                                                                                                                                                                                                                                              |
| 221 | Bothnia_retinal_dystrophy                                                        | Ophthalmological           | 1  | 3  | 1 | RLBP1 (6017)                                                                                                                                                                                                                                                                                                                              |
| 224 | Brachydactyly                                                                    | Skeletal                   | 5  | 6  | 1 | IHH (3549), BMPR1B (658), ROR2 (4920), GDF5 (8200), HOXD13 (3239)                                                                                                                                                                                                                                                                         |
| 225 | Bradyopsia                                                                       | Ophthalmological           | 2  | 0  | 0 | R9AP (342880), RGS9 (8787)                                                                                                                                                                                                                                                                                                                |
| 226 | Branchiootic_syndrome                                                            | Neurological               | 1  | 1  | 1 | EYA1 (2138)                                                                                                                                                                                                                                                                                                                               |
| 228 | Breast_cancer                                                                    | Cancer                     | 19 | 30 | 4 | CHEK2 (11200), PIK3CA (5290), PPM1D (8493), SLC22A18 (5002), TP53 (7157), BRCA1 (672), BRCA2 (675), TSG101 (7251), BRIP1 (83990), RAD54L (8438), CDH1 (999), AR (367), KRAS (3845), RB1CC1 (9821), PHB (5245), ATM (472), BARD1 (580), RAD51 (5888), XRCC3 (7517)                                                                         |
| 231 | Brody_myopathy                                                                   | Muscular                   | 1  | 0  | 0 | ATP2A1 (487)                                                                                                                                                                                                                                                                                                                              |
| 233 | Bruck_syndrome                                                                   | Unclassified               | 1  | 0  | 0 | PLOD2 (5352)                                                                                                                                                                                                                                                                                                                              |
| 234 | Brugada_syndrome                                                                 | Cardiovascular             | 1  | 4  | 1 | SCN5A (6331)                                                                                                                                                                                                                                                                                                                              |
| 235 | Brunner_syndrome                                                                 | Unclassified               | 1  | 0  | 0 | MAOA (4128)                                                                                                                                                                                                                                                                                                                               |
| 237 | Burkitt_lymphoma                                                                 | Cancer                     | 1  | 0  | 0 | MYC (4609)                                                                                                                                                                                                                                                                                                                                |
| 238 | Buschke-Ollendorff_syndrome                                                      | multiple                   | 1  | 2  | 2 | LEMD3 (23592)                                                                                                                                                                                                                                                                                                                             |
| 239 | Butterfly_dystrophy,_retinal                                                     | Ophthalmological           | 1  | 3  | 1 | RDS (5961)                                                                                                                                                                                                                                                                                                                                |
| 240 | Complementary_component_deficiency                                               | Immunological              | 13 | 1  | 1 | C1QA (712), C1QB (713), C1QG (714), C1S (716), C2 (717), IF (3426), C3 (718), C4A (720), C4B (721), C6 (729), C7 (730), C8B (732), C9 (735)                                                                                                                                                                                               |
| 252 | Cafe-au-lait_spots                                                               | Cancer                     | 2  | 8  | 1 | MSH2 (4436), MLH1 (4292)                                                                                                                                                                                                                                                                                                                  |
| 253 | Caffey_disease                                                                   | Connective_tissue_disorder | 1  | 4  | 2 | COL1A1 (1277)                                                                                                                                                                                                                                                                                                                             |
| 254 | Calcinosis,_tumoral                                                              | Bone                       | 2  | 1  | 1 | FGF23 (8074), GALNT3 (2591)                                                                                                                                                                                                                                                                                                               |
| 255 | Campomelic_dysplasia                                                             | Skeletal                   | 1  | 1  | 1 | SOX9 (6662)                                                                                                                                                                                                                                                                                                                               |
| 256 | Camptodactyly-arthropathy-coxa_vara-pericarditis_syndrome                        | Skeletal                   | 1  | 0  | 0 | PRG4 (10216)                                                                                                                                                                                                                                                                                                                              |
| 257 | Camurati-Engelmann_disease                                                       | Skeletal                   | 1  | 0  | 0 | TGFB1 (7040)                                                                                                                                                                                                                                                                                                                              |
| 258 | Canavan_disease                                                                  | Metabolic                  | 1  | 0  | 0 | ASPA (443)                                                                                                                                                                                                                                                                                                                                |
| 259 | Cancer_susceptibility                                                            | Cancer                     | 2  | 3  | 1 | FGFR4 (2264), MSH6 (2956)                                                                                                                                                                                                                                                                                                                 |
| 261 | Capillary_malformations                                                          | Cardiovascular             | 1  | 2  | 1 | RASA1 (5921)                                                                                                                                                                                                                                                                                                                              |
| 262 | Carbamoylphosphate_synthetase_I_deficiency                                       | Metabolic                  | 1  | 0  | 0 | CPS1 (1373)                                                                                                                                                                                                                                                                                                                               |
| 263 | Carbohydrate-deficient_glycoprotein_syndrome                                     | Metabolic                  | 3  | 0  | 0 | PMM2 (5373), MPI (4351), MGAT2 (4247)                                                                                                                                                                                                                                                                                                     |
| 264 | Carboxypeptidase_N_deficiency                                                    | Hematological              | 1  | 0  | 0 | CPN1 (1369)                                                                                                                                                                                                                                                                                                                               |
| 265 | Carcinoid_tumors,_intestinal                                                     | Cancer                     | 1  | 3  | 1 | SDHD (6392)                                                                                                                                                                                                                                                                                                                               |
| 267 | Cardioencephalomyopathy,_fatal_infantile,_due_to_cytochrome_c_oxidase_deficiency | Cardiovascular             | 1  | 0  | 0 | SCO2 (9997)                                                                                                                                                                                                                                                                                                                               |
| 268 | Cardiomyopathy                                                                   | Cardiovascular             | 25 | 15 | 5 | MYL3 (4634), ACTC (70), MYH7 (4625), LMNA (4000), TNNT2 (7139), TTN (7273), DES (1674), EYA4 (2070), SGCD (6444), CSRP3 (8048), TCAP (8557), ABCC9 (10060), DMD (1756), MYL2 (4633), CAV3 (859), MYH6 (4624), TNNC1 (7134), TPM1 (7168), TNNI3 (7137), MYBPC3 (4607), COX15 (1355), MYLK2 (85366), PRKAG2 (51422), PLN (5350), TAZ (6901) |
| 269 | Carney_complex                                                                   | multiple                   | 2  | 5  | 2 | PRKAR1A (5573), MYH8 (4626)                                                                                                                                                                                                                                                                                                               |
| 271 | Carnitine-acylcarnitine_translocase_deficiency                                   | Metabolic                  | 1  | 0  | 0 | SLC25A20 (788)                                                                                                                                                                                                                                                                                                                            |
| 272 | Carnitine_deficiency                                                             | Metabolic                  | 1  | 0  | 0 | SLC22A5 (6584)                                                                                                                                                                                                                                                                                                                            |
| 275 | Carpal_tunnel_syndrome,_familial                                                 | Unclassified               | 1  | 3  | 2 | TTR (7276)                                                                                                                                                                                                                                                                                                                                |

|     |                                                             |                            |    |    |   |                                                                                                                                                                                                                                                         |
|-----|-------------------------------------------------------------|----------------------------|----|----|---|---------------------------------------------------------------------------------------------------------------------------------------------------------------------------------------------------------------------------------------------------------|
| 276 | Cartilage-hair_hypoplasia                                   | Skeletal                   | 1  | 1  | 1 | RMRP (6023)                                                                                                                                                                                                                                             |
| 277 | Cataract                                                    | Ophthalmological           | 15 | 11 | 4 | CRYAA (1409), CRYBB2 (1415), PITX3 (5309), BFSP2 (8419), PAX6 (5080), CRYBA1 (1411), CRYGC (1420), LIM2 (3982), CRYGD (1421), HSF4 (3299), MIP (4284), CRYAB (1410), CRYBB1 (1414), GJA8 (2703), GJA3 (2700)                                            |
| 279 | Cavernous_malformations_of_CNS_and_retina                   | Cardiovascular             | 1  | 2  | 1 | KRIT1 (889)                                                                                                                                                                                                                                             |
| 283 | CD59_deficiency                                             | Immunological              | 1  | 0  | 0 | CD59 (966)                                                                                                                                                                                                                                              |
| 284 | CD8_deficiency,_familial                                    | Immunological              | 1  | 0  | 0 | CD8A (925)                                                                                                                                                                                                                                              |
| 287 | Central_hypoventilation_syndrome                            | Respiratory                | 5  | 8  | 4 | GDNF (2668), BDNF (627), EDN3 (1908), PHOX2B (8929), RET (5979)                                                                                                                                                                                         |
| 289 | Cerebellar_ataxia                                           | Neurological               | 2  | 5  | 3 | CP (1356), CACNA1A (773)                                                                                                                                                                                                                                |
| 291 | Cerebral_amyloid_angiopathy                                 | Neurological               | 2  | 3  | 2 | ABCA1 (19), CST3 (1471)                                                                                                                                                                                                                                 |
| 292 | Cerebrooculofacioskeletal_syndrome                          | multiple                   | 3  | 4  | 1 | ERCC2 (2068), ERCC5 (2073), ERCC6 (2074)                                                                                                                                                                                                                |
| 293 | Cerebrotendinous_xanthomatosis                              | Metabolic                  | 1  | 0  | 0 | CYP27A1 (1593)                                                                                                                                                                                                                                          |
| 294 | Cerebrovascular_disease,_occlusive                          | Unclassified               | 1  | 1  | 1 | SERPINA3 (12)                                                                                                                                                                                                                                           |
| 295 | Ceroid_lipofuscinosis                                       | Neurological               | 1  | 1  | 1 | PPT1 (5538)                                                                                                                                                                                                                                             |
| 296 | Ceroid-lipofuscinosis                                       | Neurological               | 6  | 1  | 1 | TPP1 (1200), CLN3 (1201), CLN5 (1203), CLN6 (54982), CLN8 (2055), PPT1 (5538)                                                                                                                                                                           |
| 298 | Cervical_carcinoma                                          | Cancer                     | 1  | 7  | 2 | FGFR3 (2261)                                                                                                                                                                                                                                            |
| 299 | CETP_deficiency                                             | Metabolic                  | 1  | 2  | 2 | CETP (1071)                                                                                                                                                                                                                                             |
| 300 | Chanarin-Dorfman_syndrome                                   | Metabolic                  | 1  | 0  | 0 | ABHD5 (51099)                                                                                                                                                                                                                                           |
| 301 | Charcot-Marie-Tooth_disease                                 | Neurological               | 18 | 5  | 3 | HSPB1 (3315), MPZ (4359), DNM2 (1785), HOXD10 (3236), GDAP1 (54332), PMP22 (5376), LITAF (9516), EGR2 (1959), NEFL (4747), KIF1B (23095), MFN2 (9927), RAB7 (7879), GARS (2617), MTMR2 (8898), SBF2 (81846), SH3TC2 (79628), NDRG1 (10397), GJB1 (2705) |
| 302 | CHARGE_syndrome                                             | multiple                   | 1  | 0  | 0 | CHD7 (55636)                                                                                                                                                                                                                                            |
| 303 | Char_syndrome                                               | multiple                   | 1  | 0  | 0 | TFAP2B (7021)                                                                                                                                                                                                                                           |
| 304 | Chediak-Higashi_syndrome                                    | multiple                   | 1  | 0  | 0 | LYST (1130)                                                                                                                                                                                                                                             |
| 305 | Cherubism                                                   | Unclassified               | 1  | 0  | 0 | SH3BP2 (6452)                                                                                                                                                                                                                                           |
| 306 | CHILD_syndrome                                              | Developmental              | 1  | 0  | 0 | NSDHL (50814)                                                                                                                                                                                                                                           |
| 307 | Chitotriosidase_deficiency                                  | Metabolic                  | 1  | 0  | 0 | CHIT1 (1118)                                                                                                                                                                                                                                            |
| 308 | Chloride_diarrhea,_congenital,_Finnish_type                 | Gastrointestinal           | 1  | 0  | 0 | SLC26A3 (1811)                                                                                                                                                                                                                                          |
| 309 | Cholelithiasis                                              | Gastrointestinal           | 1  | 1  | 1 | ABCB4 (5244)                                                                                                                                                                                                                                            |
| 310 | Cholestasis                                                 | Gastrointestinal           | 4  | 1  | 1 | ATP8B1 (5205), ABCB4 (5244), ABCB11 (8647), HSD3B7 (80270)                                                                                                                                                                                              |
| 313 | Cholesteryl_ester_storage_disease                           | Metabolic                  | 1  | 1  | 1 | LIPA (3988)                                                                                                                                                                                                                                             |
| 314 | Chondrocalcinosis                                           | Connective_tissue_disorder | 1  | 1  | 1 | ANKH (56172)                                                                                                                                                                                                                                            |
| 315 | Chondrodysplasia_punctata                                   | Connective_tissue_disorder | 3  | 0  | 0 | GNPAT (8443), EBP (10682), ARSE (415)                                                                                                                                                                                                                   |
| 316 | Chondrosarcoma                                              | Cancer                     | 3  | 2  | 2 | EXT1 (2131), NR4A3 (8013), EWSR1 (2130)                                                                                                                                                                                                                 |
| 318 | Chorea,_hereditary_benign                                   | Neurological               | 1  | 1  | 0 | TITF1 (7080)                                                                                                                                                                                                                                            |
| 319 | Choreoacanthocytosis                                        | Neurological               | 1  | 0  | 0 | VPS13A (23230)                                                                                                                                                                                                                                          |
| 320 | Choreoathetosis,_hypothyroidism,_and_respiratory_distresses | multiple                   | 1  | 1  | 1 | TITF1 (7080)                                                                                                                                                                                                                                            |
| 323 | Choroidal_dystrophy                                         | Ophthalmological           | 1  | 0  | 0 | CHM (1121)                                                                                                                                                                                                                                              |
| 326 | Chromosome_22q13.3_deletion_syndrome                        | multiple                   | 1  | 0  | 0 | SHANK3 (85358)                                                                                                                                                                                                                                          |
| 327 | Chronic_granulomatous_disease                               | Immunological              | 4  | 0  | 0 | CYBA (1535), NCF1 (4687), NCF2 (4688), CYBB (1536)                                                                                                                                                                                                      |
| 328 | Chudley-Lowry_syndrome                                      | multiple                   | 1  | 4  | 1 | ATRX (546)                                                                                                                                                                                                                                              |

|     |                                                          |                            |    |    |   |                                                                                                                                                                                                                                                                                                                                                                                                                                                                             |
|-----|----------------------------------------------------------|----------------------------|----|----|---|-----------------------------------------------------------------------------------------------------------------------------------------------------------------------------------------------------------------------------------------------------------------------------------------------------------------------------------------------------------------------------------------------------------------------------------------------------------------------------|
| 329 | Chylomicronemia_syndrome_familial                        | Metabolic                  | 1  | 2  | 1 | LPL (4023)                                                                                                                                                                                                                                                                                                                                                                                                                                                                  |
| 330 | Chylomicron_retention_disease                            | Gastrointestinal           | 1  | 1  | 1 | SAR1B (51128)                                                                                                                                                                                                                                                                                                                                                                                                                                                               |
| 331 | Ciliary_dyskinesia                                       | Respiratory                | 2  | 1  | 0 | DNAI1 (27019), DNAH5 (1767)                                                                                                                                                                                                                                                                                                                                                                                                                                                 |
| 332 | CINCA_syndrome                                           | multiple                   | 1  | 2  | 1 | CIAS1 (114548)                                                                                                                                                                                                                                                                                                                                                                                                                                                              |
| 334 | Cirrhosis                                                | Gastrointestinal           | 3  | 0  | 0 | KRT18 (3875), KRT8 (3856), CIRH1A (84916)                                                                                                                                                                                                                                                                                                                                                                                                                                   |
| 335 | Citrullinemia                                            | Metabolic                  | 2  | 0  | 0 | ASS (445), SLC25A13 (10165)                                                                                                                                                                                                                                                                                                                                                                                                                                                 |
| 336 | Cleft_palate                                             | Developmental              | 3  | 4  | 3 | PVRL1 (5818), MSX1 (4487), TBX22 (50945)                                                                                                                                                                                                                                                                                                                                                                                                                                    |
| 337 | Cleidocranial_dysplasia                                  | Skeletal                   | 1  | 1  | 1 | RUNX2 (860)                                                                                                                                                                                                                                                                                                                                                                                                                                                                 |
| 338 | Coats_disease                                            | Ophthalmological           | 1  | 2  | 2 | NDP (4693)                                                                                                                                                                                                                                                                                                                                                                                                                                                                  |
| 339 | Cockayne_syndrome                                        | multiple                   | 2  | 2  | 0 | ERCC8 (1161), ERCC6 (2074)                                                                                                                                                                                                                                                                                                                                                                                                                                                  |
| 340 | Codeine_sensitivity                                      | Metabolic                  | 1  | 1  | 1 | CYP2D6 (1565)                                                                                                                                                                                                                                                                                                                                                                                                                                                               |
| 341 | Coffin-Lowry_syndrome                                    | multiple                   | 1  | 1  | 1 | RPS6KA3 (6197)                                                                                                                                                                                                                                                                                                                                                                                                                                                              |
| 342 | Cohen_syndrome                                           | multiple                   | 1  | 0  | 0 | VPS13B (157680)                                                                                                                                                                                                                                                                                                                                                                                                                                                             |
| 343 | Colchicine_resistance                                    | Unclassified               | 1  | 0  | 0 | ABCB1 (5243)                                                                                                                                                                                                                                                                                                                                                                                                                                                                |
| 344 | Cold-induced_autoinflammatory_syndrome                   | Immunological              | 1  | 2  | 0 | CIAS1 (114548)                                                                                                                                                                                                                                                                                                                                                                                                                                                              |
| 345 | Coloboma_ocular                                          | Ophthalmological           | 2  | 11 | 3 | PAX6 (5080), SHH (6469)                                                                                                                                                                                                                                                                                                                                                                                                                                                     |
| 346 | Colon_cancer                                             | Cancer                     | 34 | 50 | 5 | RAD54B (25788), RAD54L (8438), BCL10 (8915), PTPN12 (5782), TGFBR2 (7048), SRC (6714), MLH3 (27030), PTPRJ (5795), ODC1 (4953), MUTYH (4595), AXIN2 (8313), BUB1B (701), EP300 (2033), PDGFRL (5157), PIK3CA (5290), TP53 (7157), APC (324), BAX (581), CTNNB1 (1499), DCC (1630), MCC (4163), NRAS (4893), MSH2 (4436), MLH1 (4292), PMS1 (5378), PMS2 (5395), MSH6 (2956), FGFR3 (2261), FLCN (201163), BRAF (673), DLC1 (10395), PLA2G2A (5320), CCND1 (595), BUB1 (699) |
| 347 | Colonic_aganglionosis_total_with_small_bowel_involvement | Gastrointestinal           | 1  | 4  | 3 | RET (5979)                                                                                                                                                                                                                                                                                                                                                                                                                                                                  |
| 348 | Colorblindness                                           | Ophthalmological           | 3  | 1  | 1 | OPN1MW (2652), OPN1LW (5956), OPN1SW (611)                                                                                                                                                                                                                                                                                                                                                                                                                                  |
| 350 | Combined_factor_V_and_VIII_deficiency                    | Hematological              | 1  | 0  | 0 | LMAN1 (3998)                                                                                                                                                                                                                                                                                                                                                                                                                                                                |
| 351 | Complex_mitochondrial_respiratory_chain_deficiency_of    | multiple                   | 2  | 0  | 0 | NDUFS6 (4726), ATPAF2 (91647)                                                                                                                                                                                                                                                                                                                                                                                                                                               |
| 352 | Cone_dystrophy                                           | Ophthalmological           | 7  | 6  | 1 | RPGR (6103), GUCA1A (2978), ABCA4 (24), AIPL1 (23746), GUCY2D (3000), RPRIP1 (57096), CRX (1406)                                                                                                                                                                                                                                                                                                                                                                            |
| 354 | Congenital_disorder_of_glycosylation                     | Metabolic                  | 13 | 0  | 0 | ALG6 (29929), ALG3 (10195), DPM1 (8813), MPDU1 (9526), ALG12 (79087), ALG8 (79053), ALG2 (85365), ALG9 (79796), SLC35C1 (55343), B4GALT1 (2683), COG7 (91949), DPAGT1 (1798), ALG1 (56052)                                                                                                                                                                                                                                                                                  |
| 355 | Congestive_heart_failure                                 | Cardiovascular             | 2  | 1  | 1 | ADRA2C (152), ADRB1 (153)                                                                                                                                                                                                                                                                                                                                                                                                                                                   |
| 356 | Conjunctivitis_ligneous                                  | Ophthalmological           | 1  | 1  | 1 | PLG (5340)                                                                                                                                                                                                                                                                                                                                                                                                                                                                  |
| 357 | Conotruncal_anomaly_face_syndrome                        | Cardiovascular             | 1  | 2  | 0 | TBX1 (6899)                                                                                                                                                                                                                                                                                                                                                                                                                                                                 |
| 358 | Contractural_arachnodactyly_congenital                   | Connective_tissue_disorder | 1  | 0  | 0 | FBN2 (2201)                                                                                                                                                                                                                                                                                                                                                                                                                                                                 |
| 359 | Convulsions                                              | Neurological               | 1  | 1  | 0 | MASS1 (84059)                                                                                                                                                                                                                                                                                                                                                                                                                                                               |
| 360 | COPD_rate_of_decline_of_lung_function_in                 | Respiratory                | 1  | 0  | 0 | MMP1 (4312)                                                                                                                                                                                                                                                                                                                                                                                                                                                                 |
| 361 | Coproporphria                                            | Metabolic                  | 1  | 1  | 1 | CPOX (1371)                                                                                                                                                                                                                                                                                                                                                                                                                                                                 |
| 362 | Corneal_dystrophy                                        | Ophthalmological           | 7  | 7  | 3 | APOA1 (335), TGFBI (7045), TACSTD2 (4070), VSX1 (30813), COL8A2 (1296), PIP5K3 (200576), KERA (11081)                                                                                                                                                                                                                                                                                                                                                                       |
| 364 | Cornelia_de_Lange_syndrome                               | Developmental              | 1  | 0  | 0 | NIPBL (25836)                                                                                                                                                                                                                                                                                                                                                                                                                                                               |
| 365 | Coronary_artery_disease                                  | Cardiovascular             | 6  | 3  | 2 | MEF2A (4205), ABCA1 (19), KL (9365), PON1 (5444), PON2 (5445), MMP3 (4314)                                                                                                                                                                                                                                                                                                                                                                                                  |

|     |                                                                                                                           |                            |    |    |   |                                                                                                                                                                                                                                                                                                                                                                                                                                                                                                                                                                                                                     |
|-----|---------------------------------------------------------------------------------------------------------------------------|----------------------------|----|----|---|---------------------------------------------------------------------------------------------------------------------------------------------------------------------------------------------------------------------------------------------------------------------------------------------------------------------------------------------------------------------------------------------------------------------------------------------------------------------------------------------------------------------------------------------------------------------------------------------------------------------|
| 366 | Corpus callosum, agenesis of, with mental retardation, ocular coloboma and micrognathia                                   | Neurological               | 1  | 0  | 0 | IGBP1 (3476)                                                                                                                                                                                                                                                                                                                                                                                                                                                                                                                                                                                                        |
| 367 | Cortisol resistance                                                                                                       | Endocrine                  | 1  | 0  | 0 | NR3C1 (2908)                                                                                                                                                                                                                                                                                                                                                                                                                                                                                                                                                                                                        |
| 368 | Cortisone reductase deficiency                                                                                            | Metabolic                  | 2  | 0  | 0 | H6PD (9563), HSD11B1 (3290)                                                                                                                                                                                                                                                                                                                                                                                                                                                                                                                                                                                         |
| 369 | Costello syndrome                                                                                                         | multiple                   | 1  | 2  | 1 | HRAS (3265)                                                                                                                                                                                                                                                                                                                                                                                                                                                                                                                                                                                                         |
| 370 | Coumarin resistance                                                                                                       | Hematological              | 1  | 1  | 1 | CYP2A6 (1548)                                                                                                                                                                                                                                                                                                                                                                                                                                                                                                                                                                                                       |
| 372 | Cowden disease                                                                                                            | Cancer                     | 2  | 9  | 2 | PTEN (5728), BMPR1A (657)                                                                                                                                                                                                                                                                                                                                                                                                                                                                                                                                                                                           |
| 374 | CPT deficiency, hepatic                                                                                                   | Metabolic                  | 2  | 1  | 1 | CPT1A (1374), CPT2 (1376)                                                                                                                                                                                                                                                                                                                                                                                                                                                                                                                                                                                           |
| 376 | Cramps, potassium-aggravated                                                                                              | Muscular                   | 1  | 5  | 3 | SCN4A (6329)                                                                                                                                                                                                                                                                                                                                                                                                                                                                                                                                                                                                        |
| 377 | Craniofacial anomalies, empty sella turcica, corneal endothelial changes, and abnormal retinal and auditory bipolar cells | multiple                   | 1  | 2  | 1 | VSX1 (30813)                                                                                                                                                                                                                                                                                                                                                                                                                                                                                                                                                                                                        |
| 378 | Craniofacial-deafness-hand syndrome                                                                                       | multiple                   | 1  | 2  | 1 | PAX3 (5077)                                                                                                                                                                                                                                                                                                                                                                                                                                                                                                                                                                                                         |
| 379 | Craniofacial-skeletal-dermatologic dysplasia                                                                              | multiple                   | 1  | 8  | 4 | FGFR2 (2263)                                                                                                                                                                                                                                                                                                                                                                                                                                                                                                                                                                                                        |
| 380 | Craniofrontonasal dysplasia                                                                                               | Skeletal                   | 1  | 0  | 0 | EFNB1 (1947)                                                                                                                                                                                                                                                                                                                                                                                                                                                                                                                                                                                                        |
| 382 | Cranio metaphyseal dysplasia                                                                                              | Bone                       | 1  | 1  | 1 | ANKH (56172)                                                                                                                                                                                                                                                                                                                                                                                                                                                                                                                                                                                                        |
| 383 | Craniosynostosis                                                                                                          | Skeletal                   | 2  | 9  | 4 | FGFR2 (2263), MSX2 (4488)                                                                                                                                                                                                                                                                                                                                                                                                                                                                                                                                                                                           |
| 384 | CRASH syndrome                                                                                                            | multiple                   | 1  | 2  | 1 | L1CAM (3897)                                                                                                                                                                                                                                                                                                                                                                                                                                                                                                                                                                                                        |
| 385 | Creatine phosphokinase                                                                                                    | Metabolic                  | 1  | 4  | 2 | CAV3 (859)                                                                                                                                                                                                                                                                                                                                                                                                                                                                                                                                                                                                          |
| 388 | Creutzfeldt-Jakob disease                                                                                                 | Neurological               | 2  | 4  | 2 | PRNP (5621), HLA-DQB1 (3119)                                                                                                                                                                                                                                                                                                                                                                                                                                                                                                                                                                                        |
| 389 | Crigler-Najjar syndrome                                                                                                   | multiple                   | 1  | 2  | 2 | UGT1A1 (54658)                                                                                                                                                                                                                                                                                                                                                                                                                                                                                                                                                                                                      |
| 390 | Crohn disease                                                                                                             | Gastrointestinal           | 2  | 3  | 2 | CARD15 (64127), DLG5 (9231)                                                                                                                                                                                                                                                                                                                                                                                                                                                                                                                                                                                         |
| 391 | Crouzon syndrome                                                                                                          | Skeletal                   | 2  | 15 | 4 | FGFR2 (2263), FGFR3 (2261)                                                                                                                                                                                                                                                                                                                                                                                                                                                                                                                                                                                          |
| 392 | Cryptorchidism                                                                                                            | Renal                      | 2  | 0  | 0 | LGR8 (122042), INSL3 (3640)                                                                                                                                                                                                                                                                                                                                                                                                                                                                                                                                                                                         |
| 394 | Currarino syndrome                                                                                                        | Skeletal                   | 1  | 0  | 0 | HLXB9 (3110)                                                                                                                                                                                                                                                                                                                                                                                                                                                                                                                                                                                                        |
| 395 | Cutis laxa                                                                                                                | Connective tissue disorder | 3  | 5  | 3 | ELN (2006), FBLN5 (10516), ATP7A (538)                                                                                                                                                                                                                                                                                                                                                                                                                                                                                                                                                                              |
| 396 | Cyclic ichthyosis with epidermolytic hyperkeratosis                                                                       | Dermatological             | 1  | 4  | 1 | KRT1 (3848)                                                                                                                                                                                                                                                                                                                                                                                                                                                                                                                                                                                                         |
| 397 | Cylindromatosis, familial                                                                                                 | Dermatological             | 1  | 0  | 0 | CYLD (1540)                                                                                                                                                                                                                                                                                                                                                                                                                                                                                                                                                                                                         |
| 398 | Cystathioninuria                                                                                                          | Metabolic                  | 1  | 1  | 1 | CTH (1491)                                                                                                                                                                                                                                                                                                                                                                                                                                                                                                                                                                                                          |
| 399 | Cystic fibrosis                                                                                                           | Respiratory                | 1  | 4  | 2 | CFTR (1080)                                                                                                                                                                                                                                                                                                                                                                                                                                                                                                                                                                                                         |
| 400 | Cystinosis                                                                                                                | Renal                      | 1  | 0  | 0 | CTNS (1497)                                                                                                                                                                                                                                                                                                                                                                                                                                                                                                                                                                                                         |
| 401 | Cystinuria                                                                                                                | Renal                      | 2  | 1  | 0 | SLC3A1 (6519), SLC7A9 (11136)                                                                                                                                                                                                                                                                                                                                                                                                                                                                                                                                                                                       |
| 402 | D-2-hydroxyglutaric aciduria                                                                                              | Metabolic                  | 1  | 0  | 0 | MGC25181 (257054)                                                                                                                                                                                                                                                                                                                                                                                                                                                                                                                                                                                                   |
| 404 | Darier disease                                                                                                            | Dermatological             | 1  | 1  | 1 | ATP2A2 (488)                                                                                                                                                                                                                                                                                                                                                                                                                                                                                                                                                                                                        |
| 405 | D-bifunctional protein deficiency                                                                                         | Metabolic                  | 1  | 0  | 0 | HSD17B4 (3295)                                                                                                                                                                                                                                                                                                                                                                                                                                                                                                                                                                                                      |
| 406 | Deafness                                                                                                                  | Ear,Nose,Throat            | 41 | 25 | 7 | EYA4 (2070), DIAPH1 (1729), MYO7A (4647), TECTA (7007), COL11A2 (1302), POU4F3 (5459), MYH9 (4627), ACTG1 (71), MYO6 (4646), GJB3 (2707), KCNQ4 (9132), GRHL2 (79977), GJB2 (2706), GJB6 (10804), TMC1 (117531), DSPP (1834), CRYM (1428), MYH14 (79784), DFNA5 (1687), COCH (1690), MYO1A (4640), TMPRSS3 (64699), CDH23 (64072), ATP2B2 (491), STRC (161497), USH1C (10083), OTOA (146183), PCDH15 (65217), CLDN14 (23562), MYO3A (53904), DFNB31 (25861), MYO15A (51168), ESPN (83715), SLC26A4 (5172), SLC26A5 (375611), TMIE (259236), OTOF (9381), JAG1 (182), KIAA1199 (57214), TIMM8A (1678), POU3F4 (5456) |
| 407 | Debrisoquine sensitivity                                                                                                  | Metabolic                  | 1  | 1  | 1 | CYP2D6 (1565)                                                                                                                                                                                                                                                                                                                                                                                                                                                                                                                                                                                                       |
| 410 | Dejerine-Sottas disease                                                                                                   | multiple                   | 4  | 3  | 1 | PMP22 (5376), EGR2 (1959), PRX (57716), MPZ (4359)                                                                                                                                                                                                                                                                                                                                                                                                                                                                                                                                                                  |



|     |                                                         |                            |    |    |    |                                                                                                                                                                                                                                                                                                                                                                                            |
|-----|---------------------------------------------------------|----------------------------|----|----|----|--------------------------------------------------------------------------------------------------------------------------------------------------------------------------------------------------------------------------------------------------------------------------------------------------------------------------------------------------------------------------------------------|
| 411 | Delayed_sleep_phase_syndrome                            | Psychiatric                | 1  | 0  | 0  | AANAT (15)                                                                                                                                                                                                                                                                                                                                                                                 |
| 412 | Dementia                                                | Neurological               | 6  | 10 | 3  | ITM2B (9445), PSEN1 (5663), MAPT (4137), SNCA (6622), SNCB (6620), TNF (7124)                                                                                                                                                                                                                                                                                                              |
| 413 | Dengue_fever_protection_against                         | Immunological              | 1  | 0  | 0  | CD209 (30835)                                                                                                                                                                                                                                                                                                                                                                              |
| 414 | Dental_anomalies_isolated                               | Skeletal                   | 1  | 1  | 1  | RUNX2 (860)                                                                                                                                                                                                                                                                                                                                                                                |
| 415 | Dentatorubro-pallidoluysian_atrophy                     | Neurological               | 1  | 0  | 0  | ATN1 (1822)                                                                                                                                                                                                                                                                                                                                                                                |
| 416 | Dent_disease                                            | Renal                      | 2  | 4  | 2  | CLCN5 (1184), OCRL (4952)                                                                                                                                                                                                                                                                                                                                                                  |
| 417 | Dentin_dysplasia_type_II                                | Bone                       | 1  | 2  | 2  | DSPP (1834)                                                                                                                                                                                                                                                                                                                                                                                |
| 418 | Dentinogenesis_imperfecta_Shields_type                  | Bone                       | 1  | 2  | 2  | DSPP (1834)                                                                                                                                                                                                                                                                                                                                                                                |
| 420 | Denys-Drash_syndrome                                    | Renal                      | 1  | 4  | 2  | WT1 (7490)                                                                                                                                                                                                                                                                                                                                                                                 |
| 422 | Dermatofibrosarcoma_protuberans                         | Cancer                     | 1  | 2  | 1  | PDGFB (5155)                                                                                                                                                                                                                                                                                                                                                                               |
| 424 | De_Sanctis-Cacchione_syndrome                           | multiple                   | 1  | 2  | 0  | ERCC6 (2074)                                                                                                                                                                                                                                                                                                                                                                               |
| 425 | Desmoid_disease_hereditary                              | Cancer                     | 1  | 6  | 1  | APC (324)                                                                                                                                                                                                                                                                                                                                                                                  |
| 426 | Desmosterolosis                                         | Metabolic                  | 1  | 0  | 0  | DHCR24 (1718)                                                                                                                                                                                                                                                                                                                                                                              |
| 427 | Diabetes_mellitus                                       | Endocrine                  | 27 | 24 | 11 | ABCC8 (6833), TCF1 (6927), SUMO4 (387082), PTPN22 (26191), INSR (3643), PPARG (5468), GCK (2645), GCGR (2642), GPD2 (2820), HNF4A (3172), IRS2 (8660), MAPK8IP1 (9479), NEUROD1 (4760), TCF2 (6928), IRS1 (3667), SLC2A2 (6514), SLC2A4 (6517), CAPN10 (11132), ENPP1 (5167), RETN (56729), PTF1A (256297), KCNJ11 (3767), AKT2 (208), IPF1 (3651), FOXP3 (50943), ACE (1636), VEGF (7422) |
| 430 | Diastrophic_dysplasia                                   | Skeletal                   | 1  | 3  | 2  | SLC26A2 (1836)                                                                                                                                                                                                                                                                                                                                                                             |
| 432 | DiGeorge_syndrome                                       | multiple                   | 1  | 2  | 1  | TBX1 (6899)                                                                                                                                                                                                                                                                                                                                                                                |
| 433 | Dihydropyrimidinuria                                    | Metabolic                  | 1  | 0  | 0  | DPYS (1807)                                                                                                                                                                                                                                                                                                                                                                                |
| 434 | Dilated_cardiomyopathy_with_woolly_hair_and_keratoderma | multiple                   | 1  | 4  | 2  | DSP (1832)                                                                                                                                                                                                                                                                                                                                                                                 |
| 435 | Dimethylglycine_dehydrogenase_deficiency                | Metabolic                  | 1  | 0  | 0  | DMGDH (29958)                                                                                                                                                                                                                                                                                                                                                                              |
| 438 | Disordered_steroidogenesis_isolated                     | Metabolic                  | 1  | 2  | 2  | POR (5447)                                                                                                                                                                                                                                                                                                                                                                                 |
| 439 | Dissection_of_cervical_arteries                         | Connective_tissue_disorder | 1  | 4  | 2  | COL1A1 (1277)                                                                                                                                                                                                                                                                                                                                                                              |
| 440 | DNA_topoisomerase                                       | Metabolic                  | 2  | 0  | 0  | TOP1 (7150), TOP2A (7153)                                                                                                                                                                                                                                                                                                                                                                  |
| 441 | Dopamine_beta-hydroxylase_deficiency                    | Metabolic                  | 1  | 1  | 1  | DBH (1621)                                                                                                                                                                                                                                                                                                                                                                                 |
| 443 | Dosage-sensitive_sex_reversal                           | Endocrine                  | 1  | 1  | 1  | NR0B1 (190)                                                                                                                                                                                                                                                                                                                                                                                |
| 444 | Double-outlet_right_ventricle                           | Cardiovascular             | 1  | 2  | 1  | CFC1 (55997)                                                                                                                                                                                                                                                                                                                                                                               |
| 445 | Down_syndrome                                           | multiple                   | 1  | 2  | 2  | MTR (4548)                                                                                                                                                                                                                                                                                                                                                                                 |
| 446 | Doyne_honeycomb_degeneration_of_retina                  | Ophthalmological           | 1  | 0  | 0  | EFEMP1 (2202)                                                                                                                                                                                                                                                                                                                                                                              |
| 447 | Drug_addiction                                          | Psychiatric                | 1  | 0  | 0  | FAAH (2166)                                                                                                                                                                                                                                                                                                                                                                                |
| 449 | Duane_syndrome                                          | multiple                   | 1  | 0  | 0  | SALL4 (57167)                                                                                                                                                                                                                                                                                                                                                                              |
| 450 | Dubin-Johnson_syndrome                                  | Metabolic                  | 1  | 0  | 0  | ABCC2 (1244)                                                                                                                                                                                                                                                                                                                                                                               |
| 451 | Duchenne_muscular_dystrophy                             | Muscular                   | 1  | 2  | 2  | DMD (1756)                                                                                                                                                                                                                                                                                                                                                                                 |
| 452 | Dygge-Melchior-Clausen_disease                          | multiple                   | 1  | 1  | 1  | DYM (54808)                                                                                                                                                                                                                                                                                                                                                                                |
| 453 | Dysalbuminemic_hyperthyroxinemia                        | Hematological              | 1  | 1  | 1  | ALB (213)                                                                                                                                                                                                                                                                                                                                                                                  |
| 454 | Dysautonomia                                            | Neurological               | 1  | 0  | 0  | IKBKAP (8518)                                                                                                                                                                                                                                                                                                                                                                              |
| 455 | Dyschromatosis                                          | Dermatological             | 1  | 0  | 0  | ADAR (103)                                                                                                                                                                                                                                                                                                                                                                                 |
| 456 | Dyserythropoietic_anemia                                | Hematological              | 1  | 2  | 2  | GATA1 (2623)                                                                                                                                                                                                                                                                                                                                                                               |
| 457 | Dysfibrinogenemia                                       | Hematological              | 3  | 4  | 2  | FGA (2243), FGB (2244), FGG (2266)                                                                                                                                                                                                                                                                                                                                                         |
| 458 | Dyskeratosis                                            | Dermatological             | 2  | 2  | 1  | DKC1 (1736), TERC (7012)                                                                                                                                                                                                                                                                                                                                                                   |
| 459 | Dyslexia                                                | Psychiatric                | 2  | 0  | 0  | DYX1C1 (161582), KIAA0319 (9856)                                                                                                                                                                                                                                                                                                                                                           |
| 460 | Dysprothrombinemia                                      | Hematological              | 1  | 2  | 1  | F2 (2147)                                                                                                                                                                                                                                                                                                                                                                                  |

|     |                                                  |                            |    |    |   |                                                                                                                                                                                                                                                  |
|-----|--------------------------------------------------|----------------------------|----|----|---|--------------------------------------------------------------------------------------------------------------------------------------------------------------------------------------------------------------------------------------------------|
| 461 | Dyssegmental_dysplasia,_Silverman-Handmaker_type | Neurological               | 1  | 1  | 0 | HSPG2 (3339)                                                                                                                                                                                                                                     |
| 462 | Dystonia                                         | Neurological               | 6  | 2  | 2 | ATP1A3 (478), TOR1A (1861), GCH1 (2643), DRD2 (1813), SGCE (8910), DRD5 (1816)                                                                                                                                                                   |
| 463 | Dystransthyretinemic_hyperthyroxinemia           | Hematological              | 1  | 3  | 2 | TTR (7276)                                                                                                                                                                                                                                       |
| 465 | EBD                                              | Dermatological             | 1  | 3  | 1 | COL7A1 (1294)                                                                                                                                                                                                                                    |
| 466 | Ectodermal_dysplasia                             | Dermatological             | 8  | 4  | 3 | EDA (1896), GJB6 (10804), EDARADD (128178), IKBKG (8517), NFKBIA (4792), EDAR (10913), PVRL1 (5818), PKP1 (5317)                                                                                                                                 |
| 467 | Ectopia                                          | Ophthalmological           | 2  | 14 | 5 | FBN1 (2200), PAX6 (5080)                                                                                                                                                                                                                         |
| 468 | EEC_syndrome                                     | Skeletal                   | 1  | 5  | 1 | TP73L (8626)                                                                                                                                                                                                                                     |
| 470 | Ehlers-Danlos_syndrome                           | Connective_tissue_disorder | 9  | 7  | 3 | TNXB (7148), B4GALT7 (11285), COL1A1 (1277), COL5A1 (1289), COL5A2 (1290), COL3A1 (1281), PLOD1 (5351), COL1A2 (1278), ADAMTS2 (9509)                                                                                                            |
| 471 | Elite_sprint_athletic_performance                | Muscular                   | 1  | 1  | 1 | ACTN3 (89)                                                                                                                                                                                                                                       |
| 472 | Eliptocytosis                                    | Hematological              | 4  | 6  | 2 | EPB41 (2035), SPTA1 (6708), SPTB (6710), SLC4A1 (6521)                                                                                                                                                                                           |
| 473 | Ellis-van_Creveld_syndrome                       | Skeletal                   | 2  | 1  | 1 | EVC (2121), EVC2 (132884)                                                                                                                                                                                                                        |
| 474 | Emery-Dreifuss_muscular_dystrophy                | Muscular                   | 2  | 2  | 2 | EMD (2010), LMNA (4000)                                                                                                                                                                                                                          |
| 475 | Emphysema                                        | Respiratory                | 1  | 1  | 1 | SERPINA1 (5265)                                                                                                                                                                                                                                  |
| 476 | Encephalopathy                                   | Neurological               | 2  | 0  | 0 | SERPINI1 (5274), COX10 (1352)                                                                                                                                                                                                                    |
| 477 | Enchondromatosis                                 | Cancer                     | 1  | 1  | 1 | PTHR1 (5745)                                                                                                                                                                                                                                     |
| 479 | Endometrial_carcinoma                            | Cancer                     | 4  | 14 | 3 | CDH1 (999), MSH3 (4437), MSH6 (2956), PTEN (5728)                                                                                                                                                                                                |
| 481 | Endotoxin_hyporesponsiveness                     | Immunological              | 1  | 0  | 0 | TLR4 (7099)                                                                                                                                                                                                                                      |
| 482 | Endplate_acetylcholinesterase_deficiency         | Neurological               | 1  | 0  | 0 | COLQ (8292)                                                                                                                                                                                                                                      |
| 483 | Enhanced_S-cone_syndrome                         | Ophthalmological           | 1  | 1  | 1 | NR2E3 (10002)                                                                                                                                                                                                                                    |
| 484 | Enlarged_vestibular_aqueduct                     | Ear,Nose,Throat            | 1  | 2  | 1 | SLC26A4 (5172)                                                                                                                                                                                                                                   |
| 485 | Enolase_deficiency                               | Metabolic                  | 1  | 0  | 0 | ENO3 (2027)                                                                                                                                                                                                                                      |
| 487 | Enterokinase_deficiency                          | Gastrointestinal           | 1  | 0  | 0 | PRSS7 (5651)                                                                                                                                                                                                                                     |
| 491 | Eosinophil_peroxidase_deficiency                 | Hematological              | 1  | 0  | 0 | EPX (8288)                                                                                                                                                                                                                                       |
| 492 | Epidermodysplasia_verruciformis                  | Dermatological             | 2  | 0  | 0 | EVER1 (11322), EVER2 (147138)                                                                                                                                                                                                                    |
| 493 | Epidermolysis_bullosa                            | Dermatological             | 11 | 9  | 3 | COL7A1 (1294), COL17A1 (1308), ITGB4 (3691), LAMA3 (3909), LAMB3 (3914), LAMC2 (3918), ITGA6 (3655), DSP (1832), KRT14 (3861), KRT5 (3852), PLEC1 (5339)                                                                                         |
| 494 | Epidermolytic_hyperkeratosis                     | Dermatological             | 3  | 5  | 1 | KRT10 (3858), KRT1 (3848), KRT9 (3857)                                                                                                                                                                                                           |
| 495 | Epilepsy                                         | Neurological               | 17 | 5  | 3 | KCNQ2 (3785), KCNQ3 (3786), GABRG2 (2566), CLCN2 (1181), JRK (8629), CACNB4 (785), SCN1A (6323), ME2 (4200), GABRA1 (2554), EPM2A (7957), NHLRC1 (378884), SLC25A22 (79751), CHRNA4 (1137), CHRNB2 (1141), LGI1 (9211), CSTB (1476), SYN1 (6853) |
| 496 | Epiphyseal_dysplasia                             | Bone                       | 6  | 7  | 4 | COMP (1311), SLC26A2 (1836), COL9A3 (1299), MATN3 (4148), COL9A1 (1297), COL9A2 (1298)                                                                                                                                                           |
| 497 | Episodic_ataxia                                  | Neurological               | 2  | 3  | 1 | KCNA1 (3736), CACNA1A (773)                                                                                                                                                                                                                      |
| 498 | Epithelial_ovarian_cancer,_somatic               | Cancer                     | 1  | 0  | 0 | OPCML (4978)                                                                                                                                                                                                                                     |
| 500 | Epstein_syndrome                                 | Hematological              | 1  | 4  | 2 | MYH9 (4627)                                                                                                                                                                                                                                      |
| 502 | Erythralgia                                      | Neurological               | 1  | 0  | 0 | SCN9A (6335)                                                                                                                                                                                                                                     |
| 504 | Erythremias                                      | Hematological              | 2  | 5  | 1 | HBA1 (3039), HBB (3043)                                                                                                                                                                                                                          |
| 505 | Erythrocytosis                                   | Hematological              | 2  | 4  | 1 | HBA2 (3040), EPOR (2057)                                                                                                                                                                                                                         |
| 507 | Erythrokeratoderma                               | Dermatological             | 3  | 2  | 1 | LOR (4014), GJB3 (2707), GJB4 (127534)                                                                                                                                                                                                           |
| 508 | Esophageal_cancer                                | Cancer                     | 4  | 2  | 2 | TGFBR2 (7048), RNF6 (6049), LZTS1 (11178), WWOX (51741)                                                                                                                                                                                          |
| 509 | Estrogen_resistance                              | Endocrine                  | 1  | 2  | 2 | ESR1 (2099)                                                                                                                                                                                                                                      |
| 510 | Ethylmalonic_encephalopathy                      | Metabolic                  | 1  | 0  | 0 | ETHE1 (23474)                                                                                                                                                                                                                                    |

|     |                                                                        |                            |    |   |   |                                                                                                                                                             |
|-----|------------------------------------------------------------------------|----------------------------|----|---|---|-------------------------------------------------------------------------------------------------------------------------------------------------------------|
| 511 | Ewing_sarcoma                                                          | Cancer                     | 1  | 1 | 1 | EWSR1 (2130)                                                                                                                                                |
| 512 | Exertional_myoglobinuria_due_to_deficiency_of_LDH-A                    | Metabolic                  | 1  | 0 | 0 | LDHA (3939)                                                                                                                                                 |
| 514 | Exostoses                                                              | Bone                       | 2  | 1 | 1 | EXT1 (2131), EXT2 (2132)                                                                                                                                    |
| 515 | Exudative_vitreoretinopathy                                            | Ophthalmological           | 3  | 8 | 4 | FZD4 (8322), LRP5 (4041), NDP (4693)                                                                                                                        |
| 516 | Eye_anomalies                                                          | Ophthalmological           | 1  | 9 | 3 | PAX6 (5080)                                                                                                                                                 |
| 517 | Ezetimibe,_nonresponse_to                                              | Unclassified               | 1  | 0 | 0 | NPC1L1 (29881)                                                                                                                                              |
| 518 | Fabry_disease                                                          | Metabolic                  | 1  | 0 | 0 | GLA (2717)                                                                                                                                                  |
| 519 | Facioscapulohumeral_muscular_dystrophy                                 | Muscular                   | 1  | 0 | 0 | FSHMD1A (2489)                                                                                                                                              |
| 520 | Factor_x_deficiency                                                    | Hematological              | 8  | 4 | 4 | CFH (3075), MCFD2 (90411), F7 (2155), F10 (2159), F11 (2160), F12 (2161), F13A1 (2162), F13B (2165)                                                         |
| 522 | Familial_Mediterranean_fever                                           | Immunological              | 1  | 0 | 0 | MEFV (4210)                                                                                                                                                 |
| 523 | Fanconi_anemia                                                         | multiple                   | 11 | 4 | 1 | FANCA (2175), FANCB (2187), FANCC (2176), BRCA2 (675), FANCD2 (2177), FANCE (2178), FANCF (2188), FANCG (2189), BRIP1 (83990), FANCL (55120), FANCM (57697) |
| 524 | Fanconi-Bickel_syndrome                                                | Metabolic                  | 1  | 1 | 1 | SLC2A2 (6514)                                                                                                                                               |
| 526 | Farber_lipogranulomatosis                                              | Metabolic                  | 1  | 0 | 0 | ASAH1 (427)                                                                                                                                                 |
| 527 | Fatty_liver,_acute,_of_pregnancy                                       | Metabolic                  | 1  | 3 | 1 | HADHA (3030)                                                                                                                                                |
| 528 | Favism                                                                 | Metabolic                  | 1  | 2 | 2 | G6PD (2539)                                                                                                                                                 |
| 530 | Fechtner_syndrome                                                      | multiple                   | 1  | 4 | 2 | MYH9 (4627)                                                                                                                                                 |
| 531 | Feingold_syndrome                                                      | multiple                   | 1  | 0 | 0 | MYCN (4613)                                                                                                                                                 |
| 532 | Fertile_eunuch_syndrome                                                | Endocrine                  | 1  | 1 | 1 | GNRHR (2798)                                                                                                                                                |
| 535 | Fibrocalculous_pancreatic_diabetes                                     | Gastrointestinal           | 1  | 2 | 1 | SPINK1 (6690)                                                                                                                                               |
| 537 | Fibromatosisl                                                          | Connective_tissue_disorder | 2  | 1 | 0 | SOS1 (6654), ANTXR2 (118429)                                                                                                                                |
| 538 | Fibrosis                                                               | Ophthalmological           | 2  | 0 | 0 | KIF21A (55605), PHOX2A (401)                                                                                                                                |
| 539 | Fibular_hypoplasia_and_complex_brachydactyly                           | Skeletal                   | 1  | 3 | 1 | GDF5 (8200)                                                                                                                                                 |
| 540 | Fish-eye_disease                                                       | Metabolic                  | 1  | 1 | 1 | LCAT (3931)                                                                                                                                                 |
| 541 | Fish-odor_syndrome                                                     | Metabolic                  | 1  | 0 | 0 | FMO3 (2328)                                                                                                                                                 |
| 542 | Fitzgerald_factor_deficiency                                           | Hematological              | 1  | 2 | 1 | KNG1 (3827)                                                                                                                                                 |
| 544 | Fluorouracil_toxicity,_sensitivity_to                                  | Metabolic                  | 1  | 1 | 1 | DPYD (1806)                                                                                                                                                 |
| 545 | Focal_cortical_dysplasia,_Taylor_balloon_cell_type                     | Developmental              | 1  | 2 | 1 | TSC1 (7248)                                                                                                                                                 |
| 546 | Follicle-stimulating_hormone_deficiency,_isolated                      | Endocrine                  | 1  | 0 | 0 | FSHB (2488)                                                                                                                                                 |
| 547 | Forebrain_defects                                                      | Neurological               | 1  | 0 | 0 | TDGF1 (6997)                                                                                                                                                |
| 548 | Foveal_hypoplasia                                                      | Ophthalmological           | 1  | 9 | 3 | PAX6 (5080)                                                                                                                                                 |
| 549 | Foveomacular_dystrophy,_adult-onset,_with_choroidal_neovascularization | Ophthalmological           | 1  | 3 | 1 | RDS (5961)                                                                                                                                                  |
| 550 | Fragile_X_syndrome                                                     | Neurological               | 1  | 0 | 0 | FMR1 (2332)                                                                                                                                                 |
| 551 | Fraser_syndrome                                                        | multiple                   | 2  | 0 | 0 | FRAS1 (80144), FREM2 (341640)                                                                                                                               |
| 552 | Frasier_syndrome                                                       | multiple                   | 1  | 4 | 2 | WT1 (7490)                                                                                                                                                  |
| 553 | Friedreich_ataxia                                                      | Neurological               | 1  | 0 | 0 | FXN (2395)                                                                                                                                                  |
| 554 | Frontometaphyseal_dysplasia                                            | Skeletal                   | 1  | 3 | 2 | FLNA (2316)                                                                                                                                                 |
| 555 | Fructose-bisphosphatase_deficiency                                     | Metabolic                  | 1  | 0 | 0 | FBP1 (2203)                                                                                                                                                 |
| 556 | Fructose_intolerance                                                   | Metabolic                  | 1  | 0 | 0 | ALDOB (229)                                                                                                                                                 |
| 557 | Fructosuria                                                            | Metabolic                  | 1  | 0 | 0 | KHK (3795)                                                                                                                                                  |
| 558 | Fuchs_endothelial_corneal_dystrophy                                    | Ophthalmological           | 1  | 1 | 1 | COL8A2 (1296)                                                                                                                                               |
| 559 | Fucosidosis                                                            | Metabolic                  | 1  | 0 | 0 | FUCA1 (2517)                                                                                                                                                |
| 560 | Fucosyltransferase-6_deficiency                                        | Metabolic                  | 1  | 0 | 0 | FUT6 (2528)                                                                                                                                                 |
| 561 | Fumarase_deficiency                                                    | Metabolic                  | 1  | 2 | 1 | FH (2271)                                                                                                                                                   |
| 562 | Fundus_albipunctatus                                                   | Ophthalmological           | 3  | 6 | 1 | RDH5 (5959), RLBP1 (6017), ABCA4 (24)                                                                                                                       |

|     |                                               |                  |    |    |   |                                                                                                                                    |
|-----|-----------------------------------------------|------------------|----|----|---|------------------------------------------------------------------------------------------------------------------------------------|
| 563 | G6PD_deficiency                               | Metabolic        | 1  | 2  | 2 | G6PD (2539)                                                                                                                        |
| 564 | GABA-transaminase_deficiency                  | Metabolic        | 1  | 0  | 0 | ABAT (18)                                                                                                                          |
| 565 | Galactokinase_deficiency                      | Metabolic        | 1  | 0  | 0 | GALK1 (2584)                                                                                                                       |
| 566 | Galactose_epimerase_deficiency                | Metabolic        | 1  | 0  | 0 | GALE (2582)                                                                                                                        |
| 567 | Galactosemia                                  | Metabolic        | 1  | 0  | 0 | GALT (2592)                                                                                                                        |
| 568 | Galactosialidosis                             | Metabolic        | 1  | 0  | 0 | PPGB (5476)                                                                                                                        |
| 570 | GAMT_deficiency                               | Metabolic        | 1  | 0  | 0 | GAMT (2593)                                                                                                                        |
| 571 | Gardner_syndrome                              | Cancer           | 1  | 6  | 1 | APC (324)                                                                                                                          |
| 572 | Gastric_cancer                                | Cancer           | 10 | 27 | 7 | APC (324), IRF1 (3659), CDH1 (999), IL1B (3553), IL1RN (3557), CASP10 (843), ERBB2 (2064), FGFR2 (2263), KLF6 (1316), MUTYH (4595) |
| 574 | Gastrointestinal_stromal_tumor                | Cancer           | 2  | 6  | 4 | KIT (3815), PDGFRA (5156)                                                                                                          |
| 575 | Gaucher_disease                               | Metabolic        | 2  | 2  | 2 | GBA (2629), PSAP (5660)                                                                                                            |
| 576 | Gaze_palsy                                    | Neurological     | 1  | 0  | 0 | ROBO3 (64221)                                                                                                                      |
| 578 | Generalized_epilepsy                          | Neurological     | 2  | 0  | 0 | KCNMA1 (3778), SCN1B (6324)                                                                                                        |
| 580 | Germ_cell_tumor                               | Cancer           | 2  | 9  | 3 | BCL10 (8915), KIT (3815)                                                                                                           |
| 581 | Gerstmann-Straussler_disease                  | Neurological     | 1  | 4  | 2 | PRNP (5621)                                                                                                                        |
| 582 | Giant_axonal_neuropathy                       | Neurological     | 1  | 0  | 0 | GAN (8139)                                                                                                                         |
| 583 | Giant-cell_fibroblastoma                      | Cancer           | 1  | 2  | 1 | PDGFB (5155)                                                                                                                       |
| 584 | Giant_platelet_disorder,_isolated             | Hematological    | 1  | 1  | 1 | GP1BB (2812)                                                                                                                       |
| 586 | Gilbert_syndrome                              | Metabolic        | 1  | 2  | 1 | UGT1A1 (54658)                                                                                                                     |
| 587 | Gitelman_syndrome                             | Renal            | 1  | 0  | 0 | SLC12A3 (6559)                                                                                                                     |
| 588 | Glanzmann_thrombasthenia                      | Hematological    | 2  | 0  | 0 | ITGA2B (3674), ITGB3 (3690)                                                                                                        |
| 589 | Glaucoma                                      | Ophthalmological | 4  | 2  | 2 | MYOC (4653), OPTN (10133), CYP1B1 (1545), OPA1 (4976)                                                                              |
| 590 | Glioblastoma                                  | Cancer           | 5  | 14 | 5 | MSH2 (4436), DMBT1 (1755), ERBB2 (2064), LGI1 (9211), PPARG (5468)                                                                 |
| 594 | Glomerulocystic_kidney_disease,_hypoplastic   | Renal            | 1  | 2  | 1 | TCF2 (6928)                                                                                                                        |
| 596 | Glomerulosclerosis                            | Renal            | 3  | 0  | 0 | ACTN4 (81), TRPC6 (7225), CD2AP (23607)                                                                                            |
| 597 | Glomuvenous_malformations                     | Cardiovascular   | 1  | 0  | 0 | GLMN (11146)                                                                                                                       |
| 598 | Glucocorticoid_deficiency                     | Endocrine        | 2  | 0  | 0 | MRAP (56246), MC2R (4158)                                                                                                          |
| 599 | Glucose/galactose_malabsorption               | Metabolic        | 1  | 0  | 0 | SLC5A1 (6523)                                                                                                                      |
| 600 | Glucose_transport_defect,_blood-brain_barrier | Metabolic        | 1  | 0  | 0 | SLC2A1 (6513)                                                                                                                      |
| 601 | Glucosidase_I_deficiency                      | Metabolic        | 1  | 0  | 0 | GCS1 (7841)                                                                                                                        |
| 602 | Glutamate_formiminotransferase_deficiency     | Metabolic        | 1  | 0  | 0 | FTCD (10841)                                                                                                                       |
| 603 | Glutaricaciduria                              | Metabolic        | 4  | 0  | 0 | GCDH (2639), ETFA (2108), ETFB (2109), ETFDH (2110)                                                                                |
| 604 | Glutathione_synthetase_deficiency             | Metabolic        | 1  | 1  | 1 | GSS (2937)                                                                                                                         |
| 607 | Glycerol_kinase_deficiency                    | Metabolic        | 1  | 0  | 0 | GK (2710)                                                                                                                          |
| 608 | Glycine_encephalopathy                        | Metabolic        | 4  | 0  | 0 | AMT (275), GCSH (2653), GLDC (2731), GNMT (27232)                                                                                  |
| 609 | Glycogenesis                                  | Metabolic        | 2  | 0  | 0 | PHKG2 (5261), PHKA2 (5256)                                                                                                         |
| 610 | Glycogen_storage_disease                      | Metabolic        | 9  | 0  | 0 | G6PC (2538), SLC37A4 (2542), GAA (2548), LAMP2 (3920), AGL (178), GBE1 (2632), GYS2 (2998), PYGL (5836), PFKM (5213)               |
| 614 | GM-gangliosidosis                             | Metabolic        | 3  | 3  | 1 | GLB1 (2720), GM2A (2760), HEXA (3073)                                                                                              |
| 615 | Gnthodiaphyseal_dysplasia                     | Bone             | 1  | 0  | 0 | TMEM16E (203859)                                                                                                                   |
| 617 | Goiter                                        | Endocrine        | 2  | 5  | 1 | TPO (7173), TG (7038)                                                                                                              |
| 618 | Goldberg-Shprintzen_megacolon_syndrome        | multiple         | 1  | 0  | 0 | KIAA1279 (26128)                                                                                                                   |
| 619 | Gonadal_dysgenesis                            | Endocrine        | 2  | 0  | 0 | DHH (50846), SRY (6736)                                                                                                            |
| 622 | GRACILE_syndrome                              | Metabolic        | 1  | 2  | 1 | BCS1L (617)                                                                                                                        |
| 623 | Graft-versus-host_disease                     | Immunological    | 1  | 2  | 2 | IL10 (3586)                                                                                                                        |
| 624 | Graves_disease                                | Endocrine        | 2  | 1  | 1 | CTLA4 (1493), GC (2638)                                                                                                            |

|     |                                                                                       |                  |    |    |   |                                                                                                                              |
|-----|---------------------------------------------------------------------------------------|------------------|----|----|---|------------------------------------------------------------------------------------------------------------------------------|
| 625 | Greenberg_dysplasia                                                                   | Skeletal         | 1  | 1  | 1 | LBR (3930)                                                                                                                   |
| 626 | Greig_cephalopolysyndactyly_syndrome                                                  | Skeletal         | 1  | 3  | 1 | GLI3 (2737)                                                                                                                  |
| 627 | Griscelli_syndrome                                                                    | Dermatological   | 3  | 0  | 0 | MYO5A (4644), RAB27A (5873), MLPH (79083)                                                                                    |
| 628 | Growth_hormone                                                                        | Endocrine        | 2  | 1  | 1 | GHRHR (2692), STAT5B (6777)                                                                                                  |
| 630 | Guttacher_syndrome                                                                    | multiple         | 1  | 1  | 0 | HOXA13 (3209)                                                                                                                |
| 632 | Gyrate_atrophy_of_choroid_and_retina_with_ornithinemia,_B6_responsive_or_unresponsive | Metabolic        | 1  | 0  | 0 | OAT (4942)                                                                                                                   |
| 633 | Hailey-Hailey_disease                                                                 | Dermatological   | 1  | 0  | 0 | ATP2C1 (27032)                                                                                                               |
| 634 | Haim-Munk_syndrome                                                                    | multiple         | 1  | 2  | 1 | CTSC (1075)                                                                                                                  |
| 638 | Hand-foot-uterus_syndrome                                                             | multiple         | 1  | 1  | 0 | HOXA13 (3209)                                                                                                                |
| 639 | Harderoporphyria                                                                      | Metabolic        | 1  | 1  | 1 | CPOX (1371)                                                                                                                  |
| 640 | HARP_syndrome                                                                         | Metabolic        | 1  | 1  | 1 | PANK2 (80025)                                                                                                                |
| 641 | Hartnup_disorder                                                                      | Metabolic        | 1  | 0  | 0 | SLC6A19 (340024)                                                                                                             |
| 643 | Hay-Wells_syndrome                                                                    | multiple         | 1  | 5  | 1 | TP73L (8626)                                                                                                                 |
| 644 | HDL_cholesterol_level_QTL                                                             | Metabolic        | 2  | 5  | 4 | ABCA1 (19), ESR1 (2099)                                                                                                      |
| 646 | Hearing_loss,_low-frequency_sensorineural                                             | Ear,Nose,Throat  | 1  | 1  | 1 | WFS1 (7466)                                                                                                                  |
| 647 | Heart_block                                                                           | Cardiovascular   | 1  | 4  | 1 | SCN5A (6331)                                                                                                                 |
| 648 | Heinz_body_anemia                                                                     | Hematological    | 3  | 8  | 1 | HBA2 (3040), HBA1 (3039), HBB (3043)                                                                                         |
| 649 | HELLP_syndrome                                                                        | Metabolic        | 1  | 3  | 1 | HADHA (3030)                                                                                                                 |
| 650 | Hemangioblastoma,_cerebellar                                                          | Cancer           | 1  | 4  | 2 | VHL (7428)                                                                                                                   |
| 651 | Hemangioma                                                                            | Cancer           | 2  | 1  | 1 | FLT4 (2324), KDR (3791)                                                                                                      |
| 652 | Hematopoiesis,_cyclic                                                                 | Hematological    | 1  | 1  | 1 | ELA2 (1991)                                                                                                                  |
| 653 | Hematuria,_familial_benign                                                            | Renal            | 1  | 1  | 1 | COL4A4 (1286)                                                                                                                |
| 654 | Heme_oxygenase-1_deficiency                                                           | Metabolic        | 1  | 0  | 0 | HMOX1 (3162)                                                                                                                 |
| 656 | Hemiplegic_migraine,_familial                                                         | Neurological     | 1  | 3  | 1 | CACNA1A (773)                                                                                                                |
| 657 | Hemochromatosis                                                                       | Metabolic        | 5  | 1  | 1 | HFE (3077), HAMP (57817), HFE2 (148738), TFR2 (7036), SLC40A1 (30061)                                                        |
| 659 | Hemoglobin_H_disease                                                                  | Hematological    | 1  | 4  | 1 | HBA2 (3040)                                                                                                                  |
| 660 | Hemolytic_anemia                                                                      | Hematological    | 10 | 8  | 3 | AK1 (203), SLC4A1 (6521), BPGM (669), G6PD (2539), GCLC (2729), GPI (2821), GSS (2937), HK1 (3098), PGK1 (5230), TPI1 (7167) |
| 661 | Hemolytic-uremic_syndrome                                                             | Hematological    | 1  | 3  | 3 | CFH (3075)                                                                                                                   |
| 662 | Hemophagocytic_lymphohistiocytosis                                                    | Hematological    | 2  | 0  | 0 | PRF1 (5551), UNC13D (201294)                                                                                                 |
| 663 | Hemophilia                                                                            | Hematological    | 2  | 1  | 1 | F8 (2157), F9 (2158)                                                                                                         |
| 664 | Hemorrhagic_diathesis                                                                 | Hematological    | 2  | 3  | 2 | SERPINA1 (5265), F5 (2153)                                                                                                   |
| 665 | Hemosiderosis,_systemic,_due_to_aceruloplasminemia                                    | Hematological    | 1  | 2  | 2 | CP (1356)                                                                                                                    |
| 666 | Hepatic_failure,_early_onset,_and_neurologic_disorder                                 | Gastrointestinal | 1  | 0  | 0 | SCO1 (6341)                                                                                                                  |
| 668 | Hepatic_adenoma                                                                       | Cancer           | 8  | 16 | 3 | TCF1 (6927), CTNNB1 (1499), PDGFRL (5157), AXIN1 (8312), TP53 (7157), IGF2R (3482), MET (4233), CASP8 (841)                  |
| 669 | Hereditary_hemorrhagic_telangiectasia                                                 | Cardiovascular   | 2  | 0  | 0 | ENG (2022), ACVRL1 (94)                                                                                                      |
| 670 | Hermansky-Pudlak_syndrome                                                             | multiple         | 7  | 0  | 0 | HPS1 (3257), HPS3 (84343), HPS4 (89781), HPS5 (11234), HPS6 (79803), AP3B1 (8546), DTNBP1 (84062)                            |
| 675 | Heterotaxy                                                                            | multiple         | 2  | 2  | 2 | CFC1 (55997), ZIC3 (7547)                                                                                                    |
| 676 | Heterotopia                                                                           | Neurological     | 1  | 3  | 1 | FLNA (2316)                                                                                                                  |
| 677 | Hex_A_pseudodeficiency                                                                | Metabolic        | 1  | 2  | 1 | HEXA (3073)                                                                                                                  |
| 679 | High-molecular-weight_kininogen_deficiency                                            | Hematological    | 1  | 2  | 1 | KNG1 (3827)                                                                                                                  |
| 681 | Hirschsprung_disease                                                                  | Gastrointestinal | 7  | 9  | 4 | EDN3 (1908), GDNF (2668), NRTN (4902), RET (5979), EDNRB (1910), ECE1 (1889), PHOX2B (8929)                                  |

|     |                                                                                                          |                  |   |    |                                                                                                                      |
|-----|----------------------------------------------------------------------------------------------------------|------------------|---|----|----------------------------------------------------------------------------------------------------------------------|
| 682 | Histidinemia                                                                                             | Metabolic        | 1 | 0  | 0 HAL (3034)                                                                                                         |
| 683 | Histiocytoma                                                                                             | Cancer           | 1 | 10 | 1 TP53 (7157)                                                                                                        |
| 684 | HIV                                                                                                      | Immunological    | 4 | 2  | 2 CCL5 (6352), IL10 (3586), CCR2 (1231), CCR5 (1234)                                                                 |
| 686 | HMG-CoA_deficiency                                                                                       | Metabolic        | 2 | 0  | 0 HMGCL (3155), HMGCS2 (3158)                                                                                        |
| 688 | Holocarboxylase_synthetase_deficiency                                                                    | Metabolic        | 1 | 0  | 0 HLCS (3141)                                                                                                        |
| 689 | Holoprosencephaly                                                                                        | Developmental    | 5 | 4  | 3 SIX3 (6496), SHH (6469), TGIF (7050), ZIC2 (7546), PTCH (5727)                                                     |
| 696 | Holt-Oram_syndrome                                                                                       | Developmental    | 1 | 0  | 0 TBX5 (6910)                                                                                                        |
| 697 | Homocysteine_plasma_level                                                                                | Metabolic        | 1 | 1  | 1 CTH (1491)                                                                                                         |
| 698 | Homocystinuria                                                                                           | Metabolic        | 2 | 1  | 1 CBS (875), MTHFR (4524)                                                                                            |
| 699 | Homocystinuria-megaloblastic_anemia,_cbl_E_type                                                          | Metabolic        | 1 | 1  | 1 MTRR (4552)                                                                                                        |
| 701 | Homozygous_2p16_deletion_syndrome                                                                        | multiple         | 1 | 1  | 1 SLC3A1 (6519)                                                                                                      |
| 702 | Hoyeraal-Hreidarsson_syndrome                                                                            | multiple         | 1 | 1  | 1 DKC1 (1736)                                                                                                        |
| 703 | HPFH                                                                                                     | Hematological    | 3 | 5  | 1 HBB (3043), HBG1 (3047), HBG2 (3048)                                                                               |
| 704 | HPRT-related_gout                                                                                        | Metabolic        | 1 | 1  | 1 HPRT1 (3251)                                                                                                       |
| 705 | H._pylori_infection                                                                                      | Immunological    | 1 | 3  | 2 IFNGR1 (3459)                                                                                                      |
| 708 | Huntington_disease                                                                                       | Neurological     | 4 | 6  | 2 HD (3064), PRNP (5621), JPH3 (57338), TBP (6908)                                                                   |
| 710 | Hyalinosis,_infantile_systemic                                                                           | multiple         | 1 | 1  | 1 ANTXR2 (118429)                                                                                                    |
| 712 | Hydrocephalus                                                                                            | Neurological     | 1 | 2  | 0 L1CAM (3897)                                                                                                       |
| 716 | Hyperalphalipoproteinemia                                                                                | Metabolic        | 1 | 2  | 2 CETP (1071)                                                                                                        |
| 717 | Hyperammonemia                                                                                           | Metabolic        | 1 | 0  | 0 ALDH18A1 (5832)                                                                                                    |
| 718 | Hyperandrogenism                                                                                         | Endocrine        | 1 | 1  | 1 CYP21A2 (1589)                                                                                                     |
| 719 | Hyperapobetalipoproteinemia                                                                              | Metabolic        | 1 | 0  | 0 PPARA (5465)                                                                                                       |
| 720 | Hyperbilirubinemia                                                                                       | Gastrointestinal | 1 | 2  | 1 UGT1A1 (54658)                                                                                                     |
| 721 | Hypercalciuria                                                                                           | Renal            | 1 | 0  | 0 SAC (55811)                                                                                                        |
| 723 | Hypercholanemia                                                                                          | Gastrointestinal | 3 | 1  | 1 BAAT (570), EPHX1 (2052), TJP2 (9414)                                                                              |
| 724 | Hypercholesterolemia                                                                                     | Metabolic        | 8 | 3  | 1 APOB (338), LDLR (3949), PCSK9 (255738), LDLRAP1 (26119), EPHX2 (2053), APOA2 (336), C7orf16 (10842), ITIH4 (3700) |
| 725 | Hyperekplexia                                                                                            | Neurological     | 2 | 1  | 1 GLRA1 (2741), GLRB (2743)                                                                                          |
| 726 | Hypereosinophilic_syndrome                                                                               | Hematological    | 1 | 1  | 1 PDGFRA (5156)                                                                                                      |
| 727 | Hyperferritinemia-cataract_syndrome                                                                      | Ophthalmological | 1 | 1  | 1 FTL (2512)                                                                                                         |
| 728 | Hyper-IgD_syndrome                                                                                       | Immunological    | 1 | 1  | 1 MVK (4598)                                                                                                         |
| 731 | Hyperinsulinism                                                                                          | Metabolic        | 1 | 2  | 1 GCK (2645)                                                                                                         |
| 732 | Hyperinsulinism-hyperammonemia_syndrome                                                                  | Metabolic        | 1 | 0  | 0 GLUD1 (2746)                                                                                                       |
| 733 | Hyperkalemic_periodic_paralysis                                                                          | Neurological     | 1 | 5  | 2 SCN4A (6329)                                                                                                       |
| 734 | Hyperkeratotic_cutaneous_capillary-venous_malformations_associated_with_cerebral_capillary_malformations | Neurological     | 1 | 2  | 2 KRIT1 (889)                                                                                                        |
| 736 | Hyperlipidemia                                                                                           | Metabolic        | 1 | 0  | 0 USF1 (7391)                                                                                                        |
| 737 | Hyperlipoproteinemia                                                                                     | Metabolic        | 2 | 3  | 3 APOC2 (344), APOE (348)                                                                                            |
| 738 | Hyperlysinemia                                                                                           | Metabolic        | 1 | 0  | 0 AASS (10157)                                                                                                       |
| 739 | Hypermethioninemia                                                                                       | Metabolic        | 2 | 1  | 1 MAT1A (4143), AHCY (191)                                                                                           |
| 740 | Hyperornithinemia-hyperammonemia-homocitrullinemia_syndrome                                              | Metabolic        | 1 | 0  | 0 SLC25A15 (10166)                                                                                                   |
| 741 | Hyperostosis,_endosteal                                                                                  | Bone             | 1 | 6  | 3 LRP5 (4041)                                                                                                        |
| 742 | Hyperoxaluria                                                                                            | Metabolic        | 2 | 0  | 0 AGXT (189), GRHPR (9380)                                                                                           |
| 743 | Hyperparathyroidism                                                                                      | Endocrine        | 3 | 9  | 2 MEN1 (4221), CDC73 (79577), CASR (846)                                                                             |
| 746 | Hyperphenylalaninemia                                                                                    | Metabolic        | 2 | 1  | 1 PCBD1 (5092), PAH (5053)                                                                                           |
| 748 | Hyperproinsulinemia                                                                                      | Endocrine        | 1 | 1  | 1 INS (3630)                                                                                                         |
| 749 | Hyperprolinemia                                                                                          | Metabolic        | 2 | 1  | 1 PRODH (5625), ALDH4A1 (8659)                                                                                       |

|     |                                                     |                                 |    |   |   |                                                                                                                                                                   |
|-----|-----------------------------------------------------|---------------------------------|----|---|---|-------------------------------------------------------------------------------------------------------------------------------------------------------------------|
| 750 | Hyperproreninemia                                   | Cardiovascular                  | 1  | 1 | 1 | REN (5972)                                                                                                                                                        |
| 751 | Hyperprothrombinemia                                | Hematological                   | 1  | 2 | 1 | F2 (2147)                                                                                                                                                         |
| 752 | Hypertension                                        | Cardiovascular                  | 12 | 9 | 7 | KCNMB1 (3779), NR3C2 (4306), AGTR1 (185), PTGIS (5740), ADD1 (118), AGT (183), ECE1 (1889), GNB3 (2784), RETN (56729), HSD11B2 (3291), NOS3 (4846), CYP3A5 (1577) |
| 754 | Hyperthyroidism                                     | Endocrine                       | 1  | 2 | 2 | TSHR (7253)                                                                                                                                                       |
| 755 | Hyperthyroidism                                     | Endocrine                       | 1  | 3 | 1 | TPO (7173)                                                                                                                                                        |
| 757 | Hypertriglyceridemia                                | Metabolic                       | 4  | 5 | 3 | APOA1 (335), APOA5 (116519), LIPI (149998), RP1 (6101)                                                                                                            |
| 758 | Hypertrypsinemia                                    | Gastrointestinal                | 1  | 4 | 3 | CFTR (1080)                                                                                                                                                       |
| 759 | Hyperuricemic_nephropathy                           | Renal                           | 1  | 1 | 1 | UMOD (7369)                                                                                                                                                       |
| 761 | Hypoaldosteronism                                   | Metabolic                       | 1  | 2 | 2 | CYP11B2 (1585)                                                                                                                                                    |
| 762 | Hypoalphalipoproteinemia                            | Metabolic                       | 1  | 4 | 3 | APOA1 (335)                                                                                                                                                       |
| 763 | Hypobetalipoproteinemia                             | Metabolic                       | 1  | 2 | 1 | APOB (338)                                                                                                                                                        |
| 764 | Hypocalcemia                                        | Endocrine                       | 1  | 2 | 1 | CASR (846)                                                                                                                                                        |
| 765 | Hypocalciuric_hypercalcemia                         | Endocrine                       | 1  | 2 | 1 | CASR (846)                                                                                                                                                        |
| 766 | Hypoceruloplasminemia                               | Metabolic                       | 1  | 2 | 2 | CP (1356)                                                                                                                                                         |
| 767 | Hypochondroplasia                                   | Skeletal                        | 1  | 7 | 2 | FGFR3 (2261)                                                                                                                                                      |
| 768 | Hypochromic_microcytic_anemia                       | Hematological                   | 1  | 4 | 1 | HBA2 (3040)                                                                                                                                                       |
| 769 | Hypodontia                                          | Skeletal                        | 2  | 3 | 2 | PAX9 (5083), MSX1 (4487)                                                                                                                                          |
| 770 | Hypofibrinogenemia                                  | Hematological                   | 1  | 2 | 1 | FGG (2266)                                                                                                                                                        |
| 771 | Hypoglobulinemia_and_absent_B_cells                 | Immunological                   | 1  | 0 | 0 | BLNK (29760)                                                                                                                                                      |
| 772 | Hypoglycemia                                        | Metabolic                       | 1  | 1 | 1 | ABCC8 (6833)                                                                                                                                                      |
| 773 | Hypogonadism,_hypergonadotropic                     | Endocrine                       | 1  | 0 | 0 | LHB (3972)                                                                                                                                                        |
| 774 | Hypogonadotropic_hypogonadism                       | Endocrine                       | 4  | 5 | 4 | GPR54 (84634), NELF (26012), GNRHR (2798), LHCGR (3973)                                                                                                           |
| 775 | Hypohaptoglobinemia                                 | Hematological                   | 1  | 1 | 1 | HP (3240)                                                                                                                                                         |
| 776 | Hypokalemic_periodic_paralysis                      | Renal                           | 3  | 7 | 3 | CACNA1S (779), KCNE3 (10008), SCN4A (6329)                                                                                                                        |
| 777 | Hypolactasia,_adult_type                            | Metabolic                       | 2  | 1 | 1 | LCT (3938), MCM6 (4175)                                                                                                                                           |
| 778 | Hypomagnesemia                                      | Renal                           | 3  | 0 | 0 | FXYD2 (486), CLDN16 (10686), TRPM6 (140803)                                                                                                                       |
| 779 | Hypoparathyroidism                                  | Endocrine                       | 2  | 0 | 0 | PTH (5741), GCM2 (9247)                                                                                                                                           |
| 780 | Hypoparathyroidism-retardation-dysmorphism_syndrome | Endocrine                       | 1  | 1 | 0 | TBCE (6905)                                                                                                                                                       |
| 781 | Hypoparathyroidism                                  | Endocrine                       | 1  | 0 | 0 | GATA3 (2625)                                                                                                                                                      |
| 782 | Hypophosphatasia                                    | Metabolic                       | 1  | 1 | 1 | ALPL (249)                                                                                                                                                        |
| 783 | Hypophosphatemia                                    | Metabolic                       | 2  | 3 | 1 | CLCN5 (1184), PHEX (5251)                                                                                                                                         |
| 784 | Hypophosphatemic_rickets                            | Bone                            | 1  | 1 | 1 | FGF23 (8074)                                                                                                                                                      |
| 785 | Hypoplastic_enamel_pitting,_localized               | Connective_tissue<br>e_disorder | 1  | 1 | 1 | ENAM (10117)                                                                                                                                                      |
| 786 | Hypoprothrombinemia                                 | Hematological                   | 1  | 2 | 1 | F2 (2147)                                                                                                                                                         |
| 787 | Hypothyroidism                                      | Endocrine                       | 7  | 5 | 2 | CTLA4 (1493), SLC5A5 (6528), DUOX2 (50506), PAX8 (7849), TSHR (7253), TG (7038), TSHB (7252)                                                                      |
| 788 | Hypotrichosis                                       | Dermatological                  | 4  | 0 | 0 | CDH3 (1001), DSG4 (147409), SOX18 (54345), CDSN (1041)                                                                                                            |
| 791 | Hypouricemia                                        | Renal                           | 1  | 0 | 0 | SLC22A12 (116085)                                                                                                                                                 |
| 792 | Hystrix-like_ichthyosis_with_deafness               | multiple                        | 1  | 5 | 2 | GJB2 (2706)                                                                                                                                                       |
| 793 | Ichthyosiform_erythroderma                          | Dermatological                  | 3  | 2 | 1 | TGM1 (7051), ALOX12B (242), ALOXE3 (59344)                                                                                                                        |
| 794 | Ichthyosis                                          | Dermatological                  | 7  | 8 | 2 | KRT2A (3849), ICHTHYIN (348938), KRT10 (3858), ABCA12 (26154), KRT1 (3848), TGM1 (7051), STS (412)                                                                |
| 795 | ICOS_deficiency                                     | Immunological                   | 1  | 0 | 0 | ICOS (29851)                                                                                                                                                      |
| 797 | IgE_levels_QTL                                      | Immunological                   | 1  | 1 | 1 | PHF11 (51131)                                                                                                                                                     |
| 798 | IgG2_deficiency                                     | Immunological                   | 1  | 0 | 0 | IGHG2 (3501)                                                                                                                                                      |
| 799 | IgG_receptor_I_phagocytic_familial_deficiency_of    | Immunological                   | 1  | 0 | 0 | FCGR1A (2209)                                                                                                                                                     |

|     |                                                                    |                  |   |   |   |                                                                             |
|-----|--------------------------------------------------------------------|------------------|---|---|---|-----------------------------------------------------------------------------|
| 801 | Immunodeficiency-centromeric_instability-facial_anomalies_syndrome | multiple         | 1 | 0 | 0 | DNMT3B (1789)                                                               |
| 802 | Immunodeficiency                                                   | Immunological    | 6 | 0 | 0 | CD3E (916), CD3G (917), AICDA (57379), CD40 (958), UNG (7374), CD40LG (959) |
| 803 | Immunodysregulation,_polyendocrinopathy,_and_enteropathy,_X-linked | multiple         | 1 | 1 | 1 | FOXP3 (50943)                                                               |
| 804 | Immunoglobulin_A_deficiency                                        | Immunological    | 1 | 0 | 0 | TNFRSF13B (23495)                                                           |
| 805 | Inclusion_body_myopathy                                            | Muscular         | 3 | 2 | 2 | MYH2 (4620), GNE (10020), VCP (7415)                                        |
| 806 | Incontinentia_pigmenti                                             | Dermatological   | 1 | 1 | 1 | IKBK (8517)                                                                 |
| 807 | Infantile_spasm_syndrome                                           | Neurological     | 1 | 5 | 1 | ARX (170302)                                                                |
| 809 | Infundibular_hypoplasia_and_hypopituitarism                        | Endocrine        | 1 | 1 | 1 | SOX3 (6658)                                                                 |
| 810 | Inosine_triphosphatase_deficiency                                  | Metabolic        | 1 | 0 | 0 | ITPA (3704)                                                                 |
| 811 | Insensitivity_to_pain                                              | Neurological     | 1 | 1 | 1 | NTRK1 (4914)                                                                |
| 812 | Insomnia                                                           | Psychiatric      | 2 | 4 | 1 | GABRB3 (2562), PRNP (5621)                                                  |
| 814 | Insulin_resistance                                                 | Metabolic        | 3 | 4 | 4 | PPARG (5468), PPP1R3A (5506), PTPN1 (5770)                                  |
| 816 | Interleukin-2_receptor,_alpha_chain,_deficiency_of                 | Immunological    | 1 | 0 | 0 | IL2RA (3559)                                                                |
| 817 | Intervertebral_disc_disease                                        | Neurological     | 2 | 1 | 1 | COL9A2 (1298), COL9A3 (1299)                                                |
| 819 | Intrauterine_and_postnatal_growth_retardation                      | Developmental    | 2 | 0 | 0 | IGF1R (3480), IGF2 (3481)                                                   |
| 820 | Intrinsic_factor_deficiency                                        | Hematological    | 1 | 0 | 0 | GIF (2694)                                                                  |
| 821 | IRAK4_deficiency                                                   | Immunological    | 1 | 0 | 0 | IRAK4 (51135)                                                               |
| 822 | Iridogoniodysgenesis                                               | Ophthalmological | 2 | 5 | 1 | FOXC1 (2296), PITX2 (5308)                                                  |
| 823 | Iris_hypoplasia_and_glaucoma                                       | Ophthalmological | 1 | 4 | 1 | FOXC1 (2296)                                                                |
| 824 | Iron_overload/deficiency                                           | Hematological    | 2 | 1 | 1 | TF (7018), FTH1 (2495)                                                      |
| 825 | Isolated_growth_hormone_deficiency                                 | Endocrine        | 1 | 0 | 0 | GH1 (2688)                                                                  |
| 826 | Isovaleric_acidemia                                                | Metabolic        | 1 | 0 | 0 | IVD (3712)                                                                  |
| 827 | Jackson-Weiss_syndrome                                             | Skeletal         | 2 | 9 | 4 | FGFR1 (2260), FGFR2 (2263)                                                  |
| 829 | Jensen_syndrome                                                    | Neurological     | 1 | 2 | 2 | TIMM8A (1678)                                                               |
| 830 | Jervell_and_Lange-Nielsen_syndrome                                 | multiple         | 2 | 2 | 1 | KCNE1 (3753), KCNQ1 (3784)                                                  |
| 831 | Joubert_syndrome                                                   | multiple         | 2 | 2 | 1 | NPHP1 (4867), AHI1 (54806)                                                  |
| 832 | Juberg-Marsidi_syndrome                                            | multiple         | 1 | 4 | 1 | ATRX (546)                                                                  |
| 833 | Juvenile_polyposis/hereditary_hemorrhagic_telangiectasia_syndrome  | Cancer           | 1 | 2 | 1 | SMAD4 (4089)                                                                |
| 835 | Kallikrein,_decreased_urinary_activity_of                          | Renal            | 1 | 0 | 0 | KLK1 (3816)                                                                 |
| 836 | Kallmann_syndrome                                                  | multiple         | 2 | 2 | 1 | FGFR1 (2260), KAL1 (3730)                                                   |
| 837 | Kanzaki_disease                                                    | Metabolic        | 1 | 1 | 1 | NAGA (4668)                                                                 |
| 838 | Kaposi_sarcoma                                                     | Immunological    | 1 | 0 | 0 | IL6 (3569)                                                                  |
| 839 | Kappa_light_chain_deficiency                                       | Immunological    | 1 | 0 | 0 | IGKC (3514)                                                                 |
| 840 | Kartagener_syndrome                                                | multiple         | 3 | 2 | 2 | DNAH11 (8701), DNAH5 (1767), DNAI1 (27019)                                  |
| 841 | Kenny-Caffey_syndrome-1                                            | multiple         | 1 | 1 | 1 | TBCE (6905)                                                                 |
| 842 | Keratitis                                                          | Ophthalmological | 1 | 9 | 3 | PAX6 (5080)                                                                 |
| 843 | Keratitis-ichthyosis-deafness_syndrome                             | multiple         | 1 | 5 | 2 | GJB2 (2706)                                                                 |
| 844 | Keratoconus                                                        | Ophthalmological | 1 | 2 | 1 | VSX1 (30813)                                                                |
| 845 | Keratoderma,_palmoplantar,_with_deafness                           | Dermatological   | 1 | 5 | 1 | GJB2 (2706)                                                                 |
| 847 | Keratosis_palmoplantaria_striata                                   | Dermatological   | 4 | 8 | 2 | SAT (6303), KRT1 (3848), DSG1 (1828), DSP (1832)                            |
| 848 | Ketoacidosis                                                       | Metabolic        | 1 | 0 | 0 | OXCT1 (5019)                                                                |
| 849 | Keutel_syndrome                                                    | multiple         | 1 | 0 | 0 | MGP (4256)                                                                  |
| 850 | Kindler_syndrome                                                   | Dermatological   | 1 | 0 | 0 | C20orf42 (55612)                                                            |
| 851 | Kininogen_deficiency                                               | Hematological    | 1 | 2 | 1 | KNG1 (3827)                                                                 |
| 853 | Klippel-Trenaunay_syndrome                                         | multiple         | 1 | 0 | 0 | AGGF1 (55109)                                                               |
| 854 | Kniest_dysplasia                                                   | Skeletal         | 1 | 5 | 4 | COL2A1 (1280)                                                               |



|     |                                                 |                  |    |    |                                                                                                                                                                                                                                                                                                                                                                                                                                                                                                                                   |
|-----|-------------------------------------------------|------------------|----|----|-----------------------------------------------------------------------------------------------------------------------------------------------------------------------------------------------------------------------------------------------------------------------------------------------------------------------------------------------------------------------------------------------------------------------------------------------------------------------------------------------------------------------------------|
| 855 | Knobloch_syndrome                               | multiple         | 1  | 0  | 0 COL18A1 (80781)                                                                                                                                                                                                                                                                                                                                                                                                                                                                                                                 |
| 856 | Krabbe_disease                                  | Neurological     | 1  | 0  | 0 GALC (2581)                                                                                                                                                                                                                                                                                                                                                                                                                                                                                                                     |
| 857 | L-2-hydroxyglutaric_aciduria                    | Metabolic        | 1  | 0  | 0 L2HGDH (79944)                                                                                                                                                                                                                                                                                                                                                                                                                                                                                                                  |
| 858 | Lactate_dehydrogenase-B_deficiency              | Metabolic        | 1  | 0  | 0 LDHB (3945)                                                                                                                                                                                                                                                                                                                                                                                                                                                                                                                     |
| 859 | Lacticacidemia_due_to_PDX1_deficiency           | Metabolic        | 1  | 0  | 0 PDHX (8050)                                                                                                                                                                                                                                                                                                                                                                                                                                                                                                                     |
| 862 | Langer_mesomelic_dysplasia                      | Skeletal         | 1  | 2  | 1 SHOX (6473)                                                                                                                                                                                                                                                                                                                                                                                                                                                                                                                     |
| 863 | Laron_dwarfism                                  | Skeletal         | 1  | 1  | 1 GHR (2690)                                                                                                                                                                                                                                                                                                                                                                                                                                                                                                                      |
| 865 | Larson_syndrome                                 | Skeletal         | 1  | 2  | 2 FLNB (2317)                                                                                                                                                                                                                                                                                                                                                                                                                                                                                                                     |
| 868 | Laryngoonychocutaneous_syndrome                 | multiple         | 1  | 1  | 1 LAMA3 (3909)                                                                                                                                                                                                                                                                                                                                                                                                                                                                                                                    |
| 869 | Lathosterolosis                                 | Metabolic        | 1  | 0  | 0 SC5DL (6309)                                                                                                                                                                                                                                                                                                                                                                                                                                                                                                                    |
| 870 | LCHAD_deficiency                                | Metabolic        | 1  | 3  | 1 HADHA (3030)                                                                                                                                                                                                                                                                                                                                                                                                                                                                                                                    |
| 871 | Lead_poisoning                                  | Metabolic        | 1  | 1  | 1 ALAD (210)                                                                                                                                                                                                                                                                                                                                                                                                                                                                                                                      |
| 872 | Leanness_inherited                              | Nutritional      | 1  | 1  | 1 AGRP (181)                                                                                                                                                                                                                                                                                                                                                                                                                                                                                                                      |
| 873 | Leber_congenital_amaurosis                      | Ophthalmological | 7  | 3  | 1 CRB1 (23418), CRX (1406), RPGRIP1 (57096), RPE65 (6121), AIPL1 (23746), GUCY2D (3000), RDH12 (145226)                                                                                                                                                                                                                                                                                                                                                                                                                           |
| 874 | Left-right_axis_malformations                   | Developmental    | 2  | 0  | 0 ACVR2B (93), LEFTY2 (7044)                                                                                                                                                                                                                                                                                                                                                                                                                                                                                                      |
| 875 | Left_ventricular_noncompaction                  | Cardiovascular   | 1  | 0  | 0 DTNA (1837)                                                                                                                                                                                                                                                                                                                                                                                                                                                                                                                     |
| 876 | Legionaire_disease                              | Immunological    | 1  | 0  | 0 TLR5 (7100)                                                                                                                                                                                                                                                                                                                                                                                                                                                                                                                     |
| 877 | Leigh_syndrome                                  | Neurological     | 12 | 6  | 2 BCS1L (617), GCSL (2654), NDUFS3 (4722), NDUFS4 (4724), NDUFS7 (374291), NDUFS8 (4728), NDUFV1 (4723), SDHA (6389), SURF1 (6834), COX15 (1355), LRPPRC (10128), PDHA1 (5160)                                                                                                                                                                                                                                                                                                                                                    |
| 878 | Leiomyomatosis                                  | Cancer           | 2  | 2  | 2 FH (2271), COL4A6 (1288)                                                                                                                                                                                                                                                                                                                                                                                                                                                                                                        |
| 880 | Leopard_syndrome                                | multiple         | 1  | 2  | 2 PTPN11 (5781)                                                                                                                                                                                                                                                                                                                                                                                                                                                                                                                   |
| 881 | Leprechaunism                                   | Developmental    | 1  | 2  | 1 INSR (3643)                                                                                                                                                                                                                                                                                                                                                                                                                                                                                                                     |
| 882 | Leprosy                                         | Immunological    | 1  | 2  | 2 PARK2 (5071)                                                                                                                                                                                                                                                                                                                                                                                                                                                                                                                    |
| 883 | Leri-Weill_dyschondrosteosis                    | Skeletal         | 1  | 2  | 1 SHOX (6473)                                                                                                                                                                                                                                                                                                                                                                                                                                                                                                                     |
| 884 | Lesch-Nyhan_syndrome,                           | Metabolic        | 1  | 1  | 1 HPRT1 (3251)                                                                                                                                                                                                                                                                                                                                                                                                                                                                                                                    |
| 886 | Leukemia                                        | Cancer           | 37 | 26 | 8 TAL1 (6886), TAL2 (6887), FLT3 (2322), NBN (4683), ZNFN1A1 (10320), HOXD4 (3233), BCR (613), ARNT (405), KRAS (3845), GMP5 (8833), MLLT10 (8028), ARHGEF12 (23365), PICALM (8301), CEBPA (1050), CHIC2 (26511), KIT (3815), LPP (4026), NPM1 (4869), NUP214 (8021), RUNX1 (861), WHSC1L1 (54904), MLLT11 (10962), NUMA1 (4926), ZBTB16 (7704), PML (5371), STAT5B (6777), ARL11 (115761), P2RX7 (5027), ARHGAP26 (23092), NF1 (4763), PTPN11 (5781), BCL2 (596), CCND1 (595), TRA@ (6955), GATA1 (2623), ABL1 (25), NQO1 (1728) |
| 889 | Leukocyte_adhesion_deficiency                   | Immunological    | 1  | 0  | 0 ITGB2 (3689)                                                                                                                                                                                                                                                                                                                                                                                                                                                                                                                    |
| 891 | Leukoencephalopathy_with_vanishing_white_matter | Neurological     | 5  | 1  | 1 EIF2B1 (1967), EIF2B2 (8892), EIF2B3 (8891), EIF2B5 (8893), EIF2B4 (8890)                                                                                                                                                                                                                                                                                                                                                                                                                                                       |
| 894 | Leydig_cell_adenoma                             | Cancer           | 1  | 4  | 3 LHCGR (3973)                                                                                                                                                                                                                                                                                                                                                                                                                                                                                                                    |
| 895 | Lhermitte-Duclos_syndrome                       | Cancer           | 1  | 8  | 2 PTEN (5728)                                                                                                                                                                                                                                                                                                                                                                                                                                                                                                                     |
| 896 | Liddle_syndrome                                 | Renal            | 2  | 1  | 1 SCNN1B (6338), SCNN1G (6340)                                                                                                                                                                                                                                                                                                                                                                                                                                                                                                    |
| 897 | Li_Fraumeni_syndrome                            | Cancer           | 1  | 3  | 1 CDKN2A (1029)                                                                                                                                                                                                                                                                                                                                                                                                                                                                                                                   |
| 898 | Li-Fraumeni_syndrome                            | Cancer           | 2  | 11 | 1 TP53 (7157), CHEK2 (11200)                                                                                                                                                                                                                                                                                                                                                                                                                                                                                                      |
| 899 | LIG4_syndrome                                   | multiple         | 1  | 1  | 1 LIG4 (3981)                                                                                                                                                                                                                                                                                                                                                                                                                                                                                                                     |
| 901 | Limb-mammary_syndrome                           | multiple         | 1  | 5  | 1 TP73L (8626)                                                                                                                                                                                                                                                                                                                                                                                                                                                                                                                    |
| 902 | Lipodystrophy                                   | Metabolic        | 5  | 8  | 7 AGPAT2 (10555), BSCL2 (26580), LMNA (4000), PPARG (5468), PPARGC1A (10891)                                                                                                                                                                                                                                                                                                                                                                                                                                                      |

|     |                                                                   |                            |    |    |   |                                                                                                                                               |
|-----|-------------------------------------------------------------------|----------------------------|----|----|---|-----------------------------------------------------------------------------------------------------------------------------------------------|
| 903 | Lipoid_adrenal_hyperplasia                                        | Endocrine                  | 2  | 0  | 0 | STAR (6770), CYP11A1 (1583)                                                                                                                   |
| 904 | Lipoma                                                            | Cancer                     | 3  | 10 | 2 | HMGA2 (8091), LPP (4026), MEN1 (4221)                                                                                                         |
| 906 | Lipoprotein_lipase_deficiency                                     | Metabolic                  | 1  | 2  | 1 | LPL (4023)                                                                                                                                    |
| 908 | Lissencephaly                                                     | Neurological               | 4  | 6  | 1 | PAFAH1B1 (5048), RELN (5649), DCX (1641), ARX (170302)                                                                                        |
| 909 | Listeria_monocytogenes                                            | Immunological              | 1  | 4  | 1 | CDH1 (999)                                                                                                                                    |
| 910 | Loeys-Dietz_syndrome                                              | Connective_tissue_disorder | 2  | 2  | 1 | TGFBR1 (7046), TGFBR2 (7048)                                                                                                                  |
| 911 | Longevity                                                         | Developmental              | 2  | 2  | 1 | CETP (1071), AKAP10 (11216)                                                                                                                   |
| 912 | Long_QT_syndrome                                                  | Cardiovascular             | 7  | 7  | 1 | KCNQ1 (3784), KCNH2 (3757), SCN5A (6331), ANK2 (287), KCNE1 (3753), KCNE2 (9992), KCNJ2 (3759)                                                |
| 913 | Lower_motor_neuron_disease,_progressive,_without_sensory_symptoms | Neurological               | 1  | 1  | 1 | DCTN1 (1639)                                                                                                                                  |
| 914 | Lowe_syndrome                                                     | Metabolic                  | 1  | 1  | 1 | OCRL (4952)                                                                                                                                   |
| 915 | Low_renin_hypertension                                            | Cardiovascular             | 1  | 2  | 2 | CYP11B2 (1585)                                                                                                                                |
| 916 | LPA_deficiency,_congenital                                        | Metabolic                  | 1  | 0  | 0 | LPA (4018)                                                                                                                                    |
| 917 | Lumbar_disc_disease                                               | Skeletal                   | 1  | 0  | 0 | CILP (8483)                                                                                                                                   |
| 918 | Lung_cancer                                                       | Cancer                     | 4  | 6  | 1 | KRAS (3845), PPP2R1B (5519), SLC22A18 (5002), MAP3K8 (1326)                                                                                   |
| 919 | Lupus_erythematosus                                               | Connective_tissue_disorder | 1  | 0  | 0 | FCGR2A (2212)                                                                                                                                 |
| 920 | Lymphangioliomyomatosis                                           | Respiratory                | 2  | 2  | 1 | TSC1 (7248), TSC2 (7249)                                                                                                                      |
| 921 | Lymphedema                                                        | Hematological              | 2  | 2  | 2 | FOXC2 (2303), FLT4 (2324)                                                                                                                     |
| 925 | Lymphoma                                                          | Cancer                     | 10 | 14 | 2 | RAP1GDS1 (5910), ATM (472), BCL8 (606), BCL10 (8915), RAD54B (25788), RAD54L (8438), FCGR2B (2213), MAD1L1 (8379), MSH2 (4436), SH2D1A (4068) |
| 930 | Lynch_cancer_family_syndrome_II                                   | Cancer                     | 1  | 7  | 1 | MSH2 (4436)                                                                                                                                   |
| 931 | Lysinuric_protein_intolerance                                     | Metabolic                  | 1  | 0  | 0 | SLC7A7 (9056)                                                                                                                                 |
| 933 | Machado-Joseph_disease                                            | Neurological               | 1  | 0  | 0 | ATXN3 (4287)                                                                                                                                  |
| 935 | Macrocytic_anemia                                                 | Hematological              | 1  | 4  | 2 | IRF1 (3659)                                                                                                                                   |
| 936 | Macrothrombocytopenia                                             | Hematological              | 1  | 2  | 2 | GATA1 (2623)                                                                                                                                  |
| 937 | Macular_degeneration                                              | Ophthalmological           | 5  | 7  | 4 | CFH (3075), HMCN1 (83872), FBLN5 (10516), CNGB3 (54714), RPGR (6103)                                                                          |
| 938 | Maculopathy,_bull's-eye                                           | Ophthalmological           | 1  | 2  | 1 | VMD2 (7439)                                                                                                                                   |
| 939 | Major_depressive_disorder                                         | Psychiatric                | 1  | 0  | 0 | FKBP5 (2289)                                                                                                                                  |
| 940 | Malaria                                                           | Immunological              | 5  | 6  | 4 | CD36 (948), ICAM1 (3383), TNF (7124), GYPC (2995), NOS2A (4843)                                                                               |
| 942 | Malignant_hyperthermia_susceptibility                             | Neurological               | 2  | 3  | 3 | RYR1 (6261), CACNA1S (779)                                                                                                                    |
| 943 | Malonyl-CoA_decarboxylase_deficiency                              | Metabolic                  | 1  | 0  | 0 | MLYCD (23417)                                                                                                                                 |
| 944 | MALT_lymphoma                                                     | Cancer                     | 1  | 0  | 0 | MALT1 (10892)                                                                                                                                 |
| 945 | Mandibuloacral_dysplasia_with_type_B_lipodystrophy                | multiple                   | 1  | 1  | 1 | ZMPSTE24 (10269)                                                                                                                              |
| 947 | Mannosidosis                                                      | Metabolic                  | 2  | 0  | 0 | MAN2B1 (4125), MANBA (4126)                                                                                                                   |
| 948 | Maple_syrup_urine_disease                                         | Metabolic                  | 4  | 1  | 1 | BCKDHA (593), BCKDHB (594), DBT (1629), GCSL (2654)                                                                                           |
| 950 | Marfan_syndrome                                                   | Connective_tissue_disorder | 2  | 8  | 4 | FBN1 (2200), COL1A2 (1278)                                                                                                                    |
| 952 | Maroteaux-Lamy_syndrome                                           | Metabolic                  | 1  | 0  | 0 | ARSB (411)                                                                                                                                    |
| 953 | Marshall_syndrome                                                 | multiple                   | 1  | 1  | 0 | COL11A1 (1301)                                                                                                                                |
| 955 | MASA_syndrome                                                     | multiple                   | 1  | 2  | 1 | L1CAM (3897)                                                                                                                                  |
| 956 | MASP2_deficiency                                                  | Immunological              | 1  | 0  | 0 | MASP2 (10747)                                                                                                                                 |

|      |                                                                |                            |    |    |   |                                                                                                                                                                                                                                                                                                                                                      |
|------|----------------------------------------------------------------|----------------------------|----|----|---|------------------------------------------------------------------------------------------------------------------------------------------------------------------------------------------------------------------------------------------------------------------------------------------------------------------------------------------------------|
| 957  | MASS_syndrome                                                  | Connective_tissue_disorder | 1  | 5  | 3 | FBN1 (2200)                                                                                                                                                                                                                                                                                                                                          |
| 958  | Mast_cell_leukemia                                             | Cancer                     | 1  | 5  | 3 | KIT (3815)                                                                                                                                                                                                                                                                                                                                           |
| 959  | Mastocytosis_with_associated_hematologic_disorder              | Immunological              | 1  | 5  | 2 | KIT (3815)                                                                                                                                                                                                                                                                                                                                           |
| 960  | Mast_syndrome                                                  | Neurological               | 1  | 0  | 0 | SPG21 (51324)                                                                                                                                                                                                                                                                                                                                        |
| 961  | May-Hegglin_anomaly                                            | Hematological              | 1  | 4  | 2 | MYH9 (4627)                                                                                                                                                                                                                                                                                                                                          |
| 962  | McArdle_disease                                                | Metabolic                  | 1  | 0  | 0 | PYGM (5837)                                                                                                                                                                                                                                                                                                                                          |
| 963  | McCune-Albright_syndrome                                       | multiple                   | 1  | 5  | 3 | GNAS (2778)                                                                                                                                                                                                                                                                                                                                          |
| 964  | McKusick-Kaufman_syndrome                                      | Developmental              | 1  | 1  | 0 | MKKS (8195)                                                                                                                                                                                                                                                                                                                                          |
| 965  | McLeod_syndrome                                                | Hematological              | 1  | 0  | 0 | XK (7504)                                                                                                                                                                                                                                                                                                                                            |
| 969  | Medullary_cystic_kidney_disease                                | Renal                      | 1  | 1  | 1 | UMOD (7369)                                                                                                                                                                                                                                                                                                                                          |
| 970  | Medulloblastoma                                                | Cancer                     | 2  | 1  | 1 | PTCH2 (8643), SUFU (51684)                                                                                                                                                                                                                                                                                                                           |
| 971  | Meesmann_corneal_dystrophy                                     | Ophthalmological           | 2  | 0  | 0 | KRT12 (3859), KRT3 (3850)                                                                                                                                                                                                                                                                                                                            |
| 973  | Megakaryoblastic_leukemia,_acute                               | Cancer                     | 1  | 0  | 0 | MKL1 (57591)                                                                                                                                                                                                                                                                                                                                         |
| 974  | Megalencephalic_leukoencephalopathy_with_subcortical_cysts     | Neurological               | 1  | 0  | 0 | MLC1 (23209)                                                                                                                                                                                                                                                                                                                                         |
| 975  | Megaloblastic_anemia                                           | Hematological              | 2  | 0  | 0 | CUBN (8029), AMN (81693)                                                                                                                                                                                                                                                                                                                             |
| 978  | Melanoma                                                       | Cancer                     | 5  | 8  | 1 | CDK4 (1019), CDKN2A (1029), XRCC3 (7517), STK11 (6794), BRAF (673)                                                                                                                                                                                                                                                                                   |
| 979  | Meleda_disease                                                 | Dermatological             | 1  | 0  | 0 | SLURP1 (57152)                                                                                                                                                                                                                                                                                                                                       |
| 981  | Melnick-Needles_syndrome                                       | Skeletal                   | 1  | 3  | 2 | FLNA (2316)                                                                                                                                                                                                                                                                                                                                          |
| 982  | Melorheostosis_with_osteopoikilosis                            | Developmental              | 1  | 2  | 1 | LEMD3 (23592)                                                                                                                                                                                                                                                                                                                                        |
| 984  | Memory_impairment                                              | Neurological               | 1  | 2  | 2 | BDNF (627)                                                                                                                                                                                                                                                                                                                                           |
| 985  | Meniere_disease                                                | Neurological               | 1  | 1  | 1 | COCH (1690)                                                                                                                                                                                                                                                                                                                                          |
| 986  | Meningioma                                                     | Cancer                     | 4  | 12 | 2 | MN1 (4330), PTEN (5728), NF2 (4771), PDGFB (5155)                                                                                                                                                                                                                                                                                                    |
| 987  | Meningococcal_disease                                          | Immunological              | 1  | 1  | 1 | MBL2 (4153)                                                                                                                                                                                                                                                                                                                                          |
| 988  | Menkes_disease                                                 | Neurological               | 1  | 2  | 1 | ATP7A (538)                                                                                                                                                                                                                                                                                                                                          |
| 990  | Mental_retardation                                             | Neurological               | 24 | 14 | 4 | PRSS12 (8492), CRBN (51185), NLGN4X (57502), MECP2 (4204), PAK3 (5063), IL1RAPL1 (11141), ARX (170302), SLC6A8 (6535), FTSJ1 (24140), ZNF81 (347344), TSPAN7 (7102), OPHN1 (4983), AFF2 (2334), SMCX (8242), GDI1 (2664), ACSL4 (2182), RPS6KA3 (6197), ARHGEF6 (9459), AGTR2 (186), FGD1 (2245), ZNF41 (7592), DLG3 (1741), SMS (6611), SOX3 (6658) |
| 991  | Mephenytoin_poor_metabolizer                                   | Metabolic                  | 1  | 2  | 1 | CYP2C19 (1557)                                                                                                                                                                                                                                                                                                                                       |
| 992  | Merkel_cell_carcinoma                                          | Cancer                     | 1  | 3  | 1 | SDHD (6392)                                                                                                                                                                                                                                                                                                                                          |
| 993  | Mesangial_sclerosis                                            | Renal                      | 1  | 4  | 2 | WT1 (7490)                                                                                                                                                                                                                                                                                                                                           |
| 995  | Mesothelioma                                                   | Cancer                     | 1  | 4  | 1 | BCL10 (8915)                                                                                                                                                                                                                                                                                                                                         |
| 996  | Metachromatic_leukodystrophy                                   | Neurological               | 2  | 2  | 1 | ARSA (410), PSAP (5660)                                                                                                                                                                                                                                                                                                                              |
| 997  | Metaphyseal_chondrodysplasia                                   | Connective_tissue_disorder | 3  | 3  | 2 | PTHR1 (5745), COL10A1 (1300), RMRP (6023)                                                                                                                                                                                                                                                                                                            |
| 999  | Methemoglobinemia                                              | Hematological              | 4  | 5  | 1 | CYB5 (1528), HBA1 (3039), HBB (3043), CYB5R3 (1727)                                                                                                                                                                                                                                                                                                  |
| 1001 | Methionine_adenosyltransferase_deficiency,_autosomal_recessive | Metabolic                  | 1  | 1  | 1 | MAT1A (4143)                                                                                                                                                                                                                                                                                                                                         |
| 1002 | Methylcobalamin_deficiency,_cblG_type                          | Metabolic                  | 1  | 2  | 1 | MTR (4548)                                                                                                                                                                                                                                                                                                                                           |
| 1003 | Methylmalonate_semialdehyde_dehydrogenase_deficiency           | Metabolic                  | 1  | 0  | 0 | ALDH6A1 (4329)                                                                                                                                                                                                                                                                                                                                       |
| 1004 | Methylmalonic_aciduria                                         | Metabolic                  | 3  | 0  | 0 | MUT (4594), MMAA (166785), MMAB (326625)                                                                                                                                                                                                                                                                                                             |
| 1005 | Mevalonicaciduria                                              | Metabolic                  | 1  | 1  | 1 | MVK (4598)                                                                                                                                                                                                                                                                                                                                           |

|      |                                          |                  |    |    |                                                                                                                                                                                                                                                      |
|------|------------------------------------------|------------------|----|----|------------------------------------------------------------------------------------------------------------------------------------------------------------------------------------------------------------------------------------------------------|
| 1006 | MHC_class_II_deficiency                  | Immunological    | 1  | 0  | 0 RFXANK (8625)                                                                                                                                                                                                                                      |
| 1007 | Microcephaly                             | Neurological     | 5  | 1  | 1 SLC25A19 (60386), MCPH1 (79648), CDK5RAP2 (55755), ASPM (259266), CENPJ (55835)                                                                                                                                                                    |
| 1009 | Microcoria-congenital_nephrosis_syndrome | Ophthalmological | 1  | 0  | 0 LAMB2 (3913)                                                                                                                                                                                                                                       |
| 1011 | Micropenis                               | Renal            | 1  | 4  | 3 LHCGR (3973)                                                                                                                                                                                                                                       |
| 1012 | Microphthalmia                           | Ophthalmological | 3  | 1  | 0 CHX10 (338917), SIX6 (4990), BCOR (54880)                                                                                                                                                                                                          |
| 1013 | Migraine                                 | Neurological     | 4  | 7  | 5 ATP1A2 (477), EDNRA (1909), ESR1 (2099), TNF (7124)                                                                                                                                                                                                |
| 1014 | Miller-Dieker_lissencephaly              | multiple         | 1  | 0  | 0 YWHAE (7531)                                                                                                                                                                                                                                       |
| 1016 | Mitochondrial_complex_deficiency         | multiple         | 7  | 3  | 2 NDUFS1 (4719), NDUFS2 (4720), NDUFS4 (4724), NDUFV1 (4723), BCS1L (617), UQCRB (7381), SDHA (6389)                                                                                                                                                 |
| 1018 | Miyoshi_myopathy                         | Muscular         | 1  | 2  | 1 DYSF (8291)                                                                                                                                                                                                                                        |
| 1020 | MODY                                     | Endocrine        | 6  | 6  | 5 TCF2 (6928), INS (3630), HNF4A (3172), GCK (2645), TCF1 (6927), IPF1 (3651)                                                                                                                                                                        |
| 1022 | Mohr-Tranebjaerg_syndrome                | Neurological     | 1  | 2  | 2 TIMM8A (1678)                                                                                                                                                                                                                                      |
| 1023 | Molybdenum_cofactor_deficiency           | Metabolic        | 3  | 0  | 0 MOCS1 (4337), MOCS2 (4338), GPHN (10243)                                                                                                                                                                                                           |
| 1024 | Monilethrix                              | Dermatological   | 2  | 0  | 0 KRTHB1 (3887), KRTHB6 (3892)                                                                                                                                                                                                                       |
| 1026 | Morning_glory_disc_anomaly               | Skeletal         | 1  | 9  | 2 PAX6 (5080)                                                                                                                                                                                                                                        |
| 1028 | Mowat-Wilson_syndrome                    | Developmental    | 1  | 0  | 0 ZFH1B (9839)                                                                                                                                                                                                                                       |
| 1029 | Moyamoya_disease                         | Neurological     | 1  | 0  | 0 MYMY3 (493818)                                                                                                                                                                                                                                     |
| 1030 | Muckle-Wells_syndrome                    | multiple         | 1  | 2  | 1 CIAS1 (114548)                                                                                                                                                                                                                                     |
| 1031 | Mucoepidermoid_salivary_gland_carcinoma  | Cancer           | 2  | 0  | 0 MAML2 (84441), MECT1 (23373)                                                                                                                                                                                                                       |
| 1032 | Mucopolidosis                            | Metabolic        | 3  | 0  | 0 GNPTAB (79158), GNPTG (84572), MCOLN1 (57192)                                                                                                                                                                                                      |
| 1033 | Mucopolysaccharidosis                    | Metabolic        | 7  | 1  | 1 IDUA (3425), IDS (3423), GALNS (2588), GLB1 (2720), GNS (2799), HYAL1 (3373), GUSB (2990)                                                                                                                                                          |
| 1034 | Muenke_syndrome                          | Skeletal         | 1  | 7  | 2 FGFR3 (2261)                                                                                                                                                                                                                                       |
| 1035 | Muir-Torre_syndrome                      | Cancer           | 2  | 8  | 1 MLH1 (4292), MSH2 (4436)                                                                                                                                                                                                                           |
| 1036 | Mulibrey_nanism                          | multiple         | 1  | 0  | 0 TRIM37 (4591)                                                                                                                                                                                                                                      |
| 1037 | Multiple_endocrine_neoplasia             | Cancer           | 2  | 11 | 4 MEN1 (4221), RET (5979)                                                                                                                                                                                                                            |
| 1038 | Muscle-eye-brain_disease                 | multiple         | 1  | 0  | 0 POMGNT1 (55624)                                                                                                                                                                                                                                    |
| 1039 | Muscle_hypertrophy                       | Muscular         | 2  | 0  | 0 PHKA1 (5255), GDF8 (2660)                                                                                                                                                                                                                          |
| 1040 | Muscular_dystrophy                       | Muscular         | 18 | 8  | 4 FKR1P (79147), LAMA2 (3908), LARGE (9215), FCMD (2218), MYOT (9499), CAPN3 (825), DYSF (8291), SGCG (6445), SGCA (6442), SGCB (6443), SGCD (6444), TCAP (8557), TRIM32 (22954), TTN (7273), POMT1 (10585), CAV3 (859), SEPN1 (57190), PLEC1 (5339) |
| 1041 | Myasthenia                               | Muscular         | 1  | 0  | 0 FIMG1 (8144)                                                                                                                                                                                                                                       |
| 1042 | Myasthenic_syndrome                      | Muscular         | 7  | 5  | 3 SCN4A (6329), CHRNB1 (1140), CHRNE (1145), RAPSN (5913), CHAT (1103), CHRNA1 (1134), CHRND (1144)                                                                                                                                                  |
| 1043 | Mycobacterial_infection                  | Immunological    | 5  | 4  | 3 IL12RB1 (3594), IFNGR1 (3459), IFNGR2 (3460), STAT1 (6772), SLC11A1 (6556)                                                                                                                                                                         |
| 1045 | Myelodysplastic_syndrome                 | Muscular         | 3  | 4  | 2 MDS1 (4197), ACSL6 (23305), IRF1 (3659)                                                                                                                                                                                                            |
| 1046 | Myelofibrosis_idiopathic                 | Hematological    | 1  | 2  | 1 JAK2 (3717)                                                                                                                                                                                                                                        |
| 1047 | Myelogenous_leukemia                     | Cancer           | 4  | 4  | 3 ACSL6 (23305), IRF1 (3659), CBFB (865), CSF1R (1436)                                                                                                                                                                                               |
| 1049 | Myelokathexis_isolated                   | Immunological    | 1  | 1  | 1 CXCR4 (7852)                                                                                                                                                                                                                                       |
| 1050 | Myelomonocytic_leukemia_chronic          | Cancer           | 1  | 1  | 1 PDGFRB (5159)                                                                                                                                                                                                                                      |
| 1051 | Myeloperoxidase_deficiency               | Immunological    | 1  | 1  | 1 MPO (4353)                                                                                                                                                                                                                                         |
| 1052 | Myeloproliferative_disorder              | Cancer           | 1  | 1  | 1 PDGFRB (5159)                                                                                                                                                                                                                                      |
| 1053 | Myoadenylate_deaminase_deficiency        | Muscular         | 1  | 0  | 0 AMPD1 (270)                                                                                                                                                                                                                                        |

|      |                                                     |                              |    |    |   |                                                                                                                                   |
|------|-----------------------------------------------------|------------------------------|----|----|---|-----------------------------------------------------------------------------------------------------------------------------------|
| 1054 | Myocardial_infarction                               | Cardiovascular               | 10 | 10 | 7 | F7 (2155), APOE (348), ACE (1636), ALOX5AP (241), LGALS2 (3957), LTA (4049), OLR1 (4973), THBD (7056), GCLM (2730), TNFSF4 (7292) |
| 1055 | Myoclonic_epilepsy                                  | Neurological                 | 3  | 6  | 1 | EFHC1 (114327), GABRG2 (2566), ARX (170302)                                                                                       |
| 1056 | Myoglobinuria/hemolysis_due_to_PGK_deficiency       | Metabolic                    | 1  | 1  | 1 | PGK1 (5230)                                                                                                                       |
| 1057 | Myokymia_with_neonatal_epilepsy                     | Neurological                 | 1  | 1  | 1 | KCNQ2 (3785)                                                                                                                      |
| 1058 | Myoneurogastrointestinal_encephalomyopathy_syndrome | multiple                     | 1  | 0  | 0 | ECGF1 (1890)                                                                                                                      |
| 1059 | Myopathy                                            | Muscular                     | 10 | 9  | 4 | ACTA1 (58), CRYAB (1410), MYF6 (4618), ITGA7 (3679), DES (1674), DYSF (8291), CAV3 (859), CPT2 (1376), PGAM2 (5224), MYH7 (4625)  |
| 1061 | Myotilinopathy                                      | Muscular                     | 1  | 1  | 1 | MYOT (9499)                                                                                                                       |
| 1062 | Myotonia_congenita                                  | Muscular                     | 2  | 5  | 3 | SCN4A (6329), CLCN1 (1180)                                                                                                        |
| 1063 | Myotonic_dystrophy                                  | Muscular                     | 2  | 0  | 0 | DMPK (1760), ZNF9 (7555)                                                                                                          |
| 1064 | Myotubular_myopathy                                 | Muscular                     | 1  | 0  | 0 | MTM1 (4534)                                                                                                                       |
| 1065 | Myxoid_liposarcoma                                  | Cancer                       | 1  | 0  | 0 | DDIT3 (1649)                                                                                                                      |
| 1066 | Myxoma,_intracardiac                                | Cardiovascular               | 1  | 4  | 1 | PRKAR1A (5573)                                                                                                                    |
| 1067 | N-acetylglutamate_synthase_deficiency               | Metabolic                    | 1  | 0  | 0 | NAGS (162417)                                                                                                                     |
| 1070 | Nail-patella_syndrome                               | multiple                     | 1  | 0  | 0 | LMX1B (4010)                                                                                                                      |
| 1071 | Nance-Horan_syndrome                                | Ophthalmological             | 1  | 0  | 0 | NHS (4810)                                                                                                                        |
| 1073 | Narcolepsy                                          | Psychiatric                  | 1  | 0  | 0 | HCRT (3060)                                                                                                                       |
| 1074 | Nasopharyngeal_carcinoma                            | Cancer                       | 1  | 10 | 1 | TP53 (7157)                                                                                                                       |
| 1075 | Nasu-Hakola_disease                                 | Bone                         | 2  | 0  | 0 | TREM2 (54209), TYROBP (7305)                                                                                                      |
| 1077 | Naxos_disease                                       | multiple                     | 1  | 0  | 0 | JUP (3728)                                                                                                                        |
| 1078 | Nemaline_myopathy                                   | Muscular                     | 4  | 1  | 1 | TPM2 (7169), TPM3 (7170), NEB (4703), TNNT1 (7138)                                                                                |
| 1080 | Nephrogenic_syndrome_of_inappropriate_antidiuresis  | Renal                        | 1  | 1  | 1 | AVPR2 (554)                                                                                                                       |
| 1081 | Nephrolithiasis                                     | Renal                        | 2  | 3  | 2 | CLCN5 (1184), ZNF365 (22891)                                                                                                      |
| 1082 | Nephronophthisis                                    | Renal                        | 4  | 2  | 1 | INVS (27130), NPHP4 (261734), NPHP3 (27031), NPHP1 (4867)                                                                         |
| 1084 | Nephropathy-hypertension                            | Renal                        | 1  | 3  | 2 | CFH (3075)                                                                                                                        |
| 1085 | Nephropathy                                         | Renal                        | 1  | 0  | 0 | CD151 (977)                                                                                                                       |
| 1087 | Nephrotic_syndrome                                  | Renal                        | 2  | 0  | 0 | NPHS1 (4868), NPHS2 (7827)                                                                                                        |
| 1088 | Netherton_syndrome                                  | Dermatological               | 1  | 1  | 1 | SPINK5 (11005)                                                                                                                    |
| 1090 | Neural_tube_defects,_maternal_risk_of               | Developmental                | 1  | 1  | 1 | MTHFD1 (4522)                                                                                                                     |
| 1091 | Neuroblastoma                                       | Cancer                       | 2  | 2  | 2 | NME1 (4830), PHOX2B (8929)                                                                                                        |
| 1092 | Neurodegeneration                                   | Neurological                 | 1  | 1  | 1 | PANK2 (80025)                                                                                                                     |
| 1093 | Neuroectodermal_tumors                              | multiple                     | 1  | 2  | 1 | PMS2 (5395)                                                                                                                       |
| 1095 | Neurofibromatosis                                   | Cancer                       | 1  | 4  | 1 | NF1 (4763)                                                                                                                        |
| 1096 | Neurofibromatosis-Noonan_syndrome                   | Cancer                       | 1  | 4  | 1 | NF1 (4763)                                                                                                                        |
| 1097 | Neurofibromatosis                                   | Cancer                       | 3  | 13 | 1 | NF1 (4763), NF2 (4771), MSH2 (4436)                                                                                               |
| 1098 | Neurofibrosarcoma                                   | Cancer                       | 1  | 1  | 1 | MXI1 (4601)                                                                                                                       |
| 1099 | Neuropathy                                          | Neurological                 | 8  | 3  | 1 | EGR2 (1959), MPZ (4359), HSPB1 (3315), HSPB8 (26353), SPTLC1 (10558), NGFB (4803), HSN2 (378465), PMP22 (5376)                    |
| 1101 | Neutropenia                                         | Hematological                | 4  | 4  | 2 | FCGR3A (2214), ELA2 (1991), GFI1 (2672), WAS (7454)                                                                               |
| 1102 | Neutrophil_immunodeficiency_syndrome                | Immunological                | 1  | 0  | 0 | RAC2 (5880)                                                                                                                       |
| 1103 | Nevo_syndrome                                       | Connective_tissue_e_disorder | 1  | 1  | 1 | PLOD1 (5351)                                                                                                                      |
| 1104 | Nevus,_epidermal,_epidermolytic_hyperkeratotic_type | Dermatological               | 1  | 2  | 1 | KRT10 (3858)                                                                                                                      |
| 1105 | Newfoundland_rod-cone_dystrophy                     | Ophthalmological             | 1  | 3  | 1 | RLBP1 (6017)                                                                                                                      |

|      |                                                              |                            |    |   |   |                                                                                                                                                                                                                                                                                           |
|------|--------------------------------------------------------------|----------------------------|----|---|---|-------------------------------------------------------------------------------------------------------------------------------------------------------------------------------------------------------------------------------------------------------------------------------------------|
| 1106 | Nicotine_addiction                                           | Psychiatric                | 3  | 2 | 2 | CYP2A6 (1548), CHRNA4 (1137), GPR51 (9568)                                                                                                                                                                                                                                                |
| 1107 | Niemann-Pick_disease                                         | Metabolic                  | 3  | 0 | 0 | SMPD1 (6609), NPC1 (4864), NPC2 (10557)                                                                                                                                                                                                                                                   |
| 1110 | Night_blindness                                              | Ophthalmological           | 5  | 1 | 1 | GNAT1 (2779), NYX (60506), PDE6B (5158), CACNA1F (778), RHO (6010)                                                                                                                                                                                                                        |
| 1111 | Nijmegen_breakage_syndrome                                   | multiple                   | 1  | 1 | 1 | NBN (4683)                                                                                                                                                                                                                                                                                |
| 1112 | Nonaka_myopathy                                              | Muscular                   | 1  | 2 | 2 | GNE (10020)                                                                                                                                                                                                                                                                               |
| 1113 | Noncompaction_of_left_ventricular_myocardium                 | Cardiovascular             | 1  | 2 | 1 | TAZ (6901)                                                                                                                                                                                                                                                                                |
| 1114 | Non-Hodgkin_lymphoma                                         | Cancer                     | 1  | 2 | 2 | CASP10 (843)                                                                                                                                                                                                                                                                              |
| 1115 | Nonsmall_cell_lung_cancer                                    | Cancer                     | 3  | 7 | 3 | IRF1 (3659), EGFR (1956), BRAF (673)                                                                                                                                                                                                                                                      |
| 1116 | Noonan_syndrome                                              | Developmental              | 1  | 2 | 1 | PTPN11 (5781)                                                                                                                                                                                                                                                                             |
| 1117 | Norrie_disease                                               | Neurological               | 1  | 2 | 1 | NDP (4693)                                                                                                                                                                                                                                                                                |
| 1118 | Norum_disease                                                | Metabolic                  | 1  | 1 | 1 | LCAT (3931)                                                                                                                                                                                                                                                                               |
| 1119 | Norwalk_virus_infection,_resistance_to                       | Immunological              | 1  | 1 | 1 | FUT2 (2524)                                                                                                                                                                                                                                                                               |
| 1122 | Nucleoside_phosphorylase_deficiency,_immunodeficiency_due_to | Immunological              | 1  | 0 | 0 | NP (4860)                                                                                                                                                                                                                                                                                 |
| 1126 | Obesity                                                      | Nutritional                | 21 | 8 | 7 | POMC (5443), MC4R (4160), AKR1C2 (1646), NTRK2 (4915), AGRP (181), NROB2 (8431), LEP (3952), LEPR (3953), PPARG (5468), SIM1 (6492), UCP3 (7352), MC3R (4159), SLC6A14 (11254), ADRB2 (154), ADRB3 (155), CART (9607), ENPP1 (5167), GHRL (51738), UCP1 (7350), UCP2 (7351), PCSK1 (5122) |
| 1128 | Obsessive-compulsive_disorder                                | Psychiatric                | 3  | 7 | 5 | SLC6A4 (6532), BDNF (627), HTR2A (3356)                                                                                                                                                                                                                                                   |
| 1129 | Occipital_horn_syndrome                                      | multiple                   | 1  | 2 | 2 | ATP7A (538)                                                                                                                                                                                                                                                                               |
| 1130 | Ocular_albinism                                              | Ophthalmological           | 3  | 4 | 2 | GPR143 (4935), MC1R (4157), SLC45A2 (51151)                                                                                                                                                                                                                                               |
| 1132 | Oculodentodigital_dysplasia                                  | Skeletal                   | 1  | 3 | 2 | GJA1 (2697)                                                                                                                                                                                                                                                                               |
| 1133 | Oculofaciocardiodental_syndrome                              | multiple                   | 1  | 1 | 1 | BCOR (54880)                                                                                                                                                                                                                                                                              |
| 1135 | Oculopharyngeal_muscular_dystrophy                           | Muscular                   | 1  | 0 | 0 | PABPN1 (8106)                                                                                                                                                                                                                                                                             |
| 1136 | Odontohypophosphatasia                                       | Bone                       | 1  | 1 | 1 | ALPL (249)                                                                                                                                                                                                                                                                                |
| 1137 | Oguchi_disease                                               | Ophthalmological           | 2  | 0 | 0 | SAG (6295), GRK1 (6011)                                                                                                                                                                                                                                                                   |
| 1138 | Oligodendroglioma                                            | Cancer                     | 1  | 8 | 2 | PTEN (5728)                                                                                                                                                                                                                                                                               |
| 1139 | Oligodontia                                                  | Skeletal                   | 1  | 1 | 1 | PAX9 (5083)                                                                                                                                                                                                                                                                               |
| 1140 | Oligodontia-colorectal_cancer_syndrome                       | Cancer                     | 1  | 1 | 1 | AXIN2 (8313)                                                                                                                                                                                                                                                                              |
| 1141 | Omenn_syndrome                                               | Immunological              | 3  | 1 | 1 | DCLRE1C (64421), RAG1 (5896), RAG2 (5897)                                                                                                                                                                                                                                                 |
| 1142 | Opitz_G_syndrome                                             | multiple                   | 1  | 0 | 0 | MID1 (4281)                                                                                                                                                                                                                                                                               |
| 1143 | Opremazole_poor_metabolizer                                  | Metabolic                  | 1  | 2 | 1 | CYP2C19 (1557)                                                                                                                                                                                                                                                                            |
| 1144 | Optic_atrophy                                                | Ophthalmological           | 2  | 2 | 2 | OPA1 (4976), OPA3 (80207)                                                                                                                                                                                                                                                                 |
| 1145 | Oral-facial-digital_syndrome                                 | Skeletal                   | 1  | 0 | 0 | OFD1 (8481)                                                                                                                                                                                                                                                                               |
| 1146 | Ornithine_transcarbamylase_deficiency                        | Metabolic                  | 1  | 0 | 0 | OTC (5009)                                                                                                                                                                                                                                                                                |
| 1147 | Orofacial_cleft                                              | Skeletal                   | 1  | 2 | 1 | IRF6 (3664)                                                                                                                                                                                                                                                                               |
| 1148 | Orolaryngeal_cancer                                          | Cancer                     | 1  | 3 | 1 | CDKN2A (1029)                                                                                                                                                                                                                                                                             |
| 1149 | Oroticaciduria                                               | Metabolic                  | 1  | 0 | 0 | UMPS (7372)                                                                                                                                                                                                                                                                               |
| 1150 | Orthostatic_intolerance                                      | Cardiovascular             | 1  | 0 | 0 | SLC6A2 (6530)                                                                                                                                                                                                                                                                             |
| 1151 | OSMED_syndrome                                               | Bone                       | 1  | 3 | 2 | COL11A2 (1302)                                                                                                                                                                                                                                                                            |
| 1152 | Osseous_heteroplasia                                         | Bone                       | 1  | 5 | 2 | GNAS (2778)                                                                                                                                                                                                                                                                               |
| 1153 | Ossification_of_the_posterior_longitudinal_spinal_ligaments  | Connective_tissue_disorder | 1  | 2 | 2 | ENPP1 (5167)                                                                                                                                                                                                                                                                              |
| 1154 | Osteoarthritis                                               | Connective_tissue_disorder | 4  | 7 | 3 | MATN3 (4148), FRZB (2487), ASPN (54829), COL2A1 (1280)                                                                                                                                                                                                                                    |
| 1156 | Osteogenesis_imperfecta                                      | Bone                       | 2  | 5 | 2 | COL1A2 (1278), COL1A1 (1277)                                                                                                                                                                                                                                                              |
| 1157 | Osteolysis                                                   | Bone                       | 2  | 1 | 1 | TNFRSF11A (8792), MMP2 (4313)                                                                                                                                                                                                                                                             |

|      |                                               |                  |    |    |   |                                                                                                                                                           |
|------|-----------------------------------------------|------------------|----|----|---|-----------------------------------------------------------------------------------------------------------------------------------------------------------|
| 1161 | Osteopetrosis                                 | Bone             | 4  | 6  | 3 | LRP5 (4041), CLCN7 (1186), OSTM1 (28962), TCIRG1 (10312)                                                                                                  |
| 1162 | Osteopoikilosis                               | Bone             | 1  | 2  | 1 | LEMD3 (23592)                                                                                                                                             |
| 1163 | Osteoporosis                                  | Bone             | 6  | 12 | 5 | COL1A1 (1277), LRP5 (4041), CALCA (796), SLC34A1 (6569), COL1A2 (1278), CALCR (799)                                                                       |
| 1164 | Osteoporosis-pseudoglioma_syndrome            | Bone             | 1  | 6  | 3 | LRP5 (4041)                                                                                                                                               |
| 1165 | Osteoporosis                                  | Bone             | 1  | 0  | 0 | PDLIM4 (8572)                                                                                                                                             |
| 1166 | Osteosarcoma                                  | Cancer           | 2  | 11 | 1 | TP53 (7157), CHEK2 (11200)                                                                                                                                |
| 1168 | Otopalatodigital_syndrome                     | multiple         | 1  | 3  | 2 | FLNA (2316)                                                                                                                                               |
| 1170 | Ovarian_cancer                                | Cancer           | 8  | 16 | 2 | BRCA1 (672), MSH2 (4436), PIK3CA (5290), MSH6 (2956), ERBB2 (2064), CDH1 (999), RRAS2 (22800), CTNNB1 (1499)                                              |
| 1171 | Ovarioleukodystrophy                          | Neurological     | 3  | 1  | 1 | EIF2B2 (8892), EIF2B4 (8890), EIF2B5 (8893)                                                                                                               |
| 1172 | Pachonychia_congenita                         | Dermatological   | 4  | 2  | 1 | KRT17 (3872), KRT6B (3854), KRT16 (3868), KRT6A (3853)                                                                                                    |
| 1173 | Paget_disease                                 | Bone             | 3  | 1  | 1 | TNFRSF11B (4982), SQSTM1 (8878), TNFRSF11A (8792)                                                                                                         |
| 1174 | Pallidopontonigral_degeneration               | Neurological     | 1  | 3  | 1 | MAPT (4137)                                                                                                                                               |
| 1175 | Pallister-Hall_syndrome                       | multiple         | 1  | 3  | 1 | GLI3 (2737)                                                                                                                                               |
| 1176 | Palmoplantar_keratoderma                      | Dermatological   | 1  | 1  | 1 | KRT16 (3868)                                                                                                                                              |
| 1178 | Pancreatic_cancer                             | Cancer           | 9  | 23 | 1 | ARMET (7873), BRCA2 (675), TP53 (7157), SMAD4 (4089), CDKN2A (1029), ACVR1B (91), STK11 (6794), KRAS (3845), RBBP8 (5932)                                 |
| 1179 | Pancreatitis                                  | Gastrointestinal | 3  | 6  | 3 | PRSS1 (5644), SPINK1 (6690), CFTR (1080)                                                                                                                  |
| 1183 | Papillary_serous_carcinoma_of_the_peritoneum  | Cancer           | 1  | 2  | 1 | BRCA1 (672)                                                                                                                                               |
| 1184 | Papillon-Lefevre_syndrome                     | multiple         | 1  | 2  | 1 | CTSC (1075)                                                                                                                                               |
| 1186 | Paragangliomas                                | Cancer           | 3  | 3  | 1 | SDHB (6390), SDHD (6392), SDHC (6391)                                                                                                                     |
| 1188 | Paramyotonia_congenita                        | Muscular         | 1  | 5  | 3 | SCN4A (6329)                                                                                                                                              |
| 1189 | Parathyroid_adenoma                           | Cancer           | 2  | 7  | 2 | MEN1 (4221), CDC73 (79577)                                                                                                                                |
| 1190 | Parietal_foramina                             | Skeletal         | 2  | 1  | 1 | MSX2 (4488), ALX4 (60529)                                                                                                                                 |
| 1191 | Parkes_Weber_syndrome                         | multiple         | 1  | 2  | 2 | RASA1 (5921)                                                                                                                                              |
| 1192 | Parkinson_disease                             | Neurological     | 11 | 6  | 4 | NR4A2 (4929), SNCAIP (9627), TBP (6908), SNCA (6622), PARK7 (11315), LRRK2 (120892), PINK1 (65018), UCHL1 (7345), PARK2 (5071), DBH (1621), NDUFV2 (4729) |
| 1195 | Paroxysmal_kinesigenic_choreoathetosis        | Neurological     | 1  | 0  | 0 | MR-1 (25953)                                                                                                                                              |
| 1196 | Partington_syndrome                           | Neurological     | 1  | 5  | 1 | ARX (170302)                                                                                                                                              |
| 1198 | PCWH                                          | Neurological     | 1  | 2  | 0 | SOX10 (6663)                                                                                                                                              |
| 1199 | Pelger-Huet_anomaly                           | Hematological    | 1  | 1  | 1 | LBR (3930)                                                                                                                                                |
| 1200 | Pelizaeus-Merzbacher_disease                  | Neurological     | 1  | 1  | 1 | PLP1 (5354)                                                                                                                                               |
| 1201 | (null)                                        | Neurological     | 1  | 0  | 0 | GJA12 (57165)                                                                                                                                             |
| 1204 | Pendred_syndrome                              | Ear,Nose,Throat  | 1  | 2  | 1 | SLC26A4 (5172)                                                                                                                                            |
| 1205 | Perineal_hypospadias                          | Endocrine        | 1  | 4  | 3 | AR (367)                                                                                                                                                  |
| 1206 | Periodic_fever_familial                       | Immunological    | 1  | 0  | 0 | TNFRSF1A (7132)                                                                                                                                           |
| 1207 | Periodontitis                                 | Ear,Nose,Throat  | 1  | 2  | 0 | CTSC (1075)                                                                                                                                               |
| 1209 | Periventricular_heterotopia_with_microcephaly | Neurological     | 1  | 0  | 0 | ARFGF2 (10564)                                                                                                                                            |
| 1210 | Peroxisomal_biogenesis_disorder               | multiple         | 2  | 0  | 0 | PEX6 (5190), PEX12 (5193)                                                                                                                                 |
| 1212 | Persistent_Mullerian_duct_syndrome            | Developmental    | 2  | 0  | 0 | AMH (268), AMHR2 (269)                                                                                                                                    |
| 1213 | Peters_anomaly                                | Developmental    | 2  | 10 | 2 | PAX6 (5080), CYP1B1 (1545)                                                                                                                                |
| 1214 | Peutz-Jeghers_syndrome                        | Cancer           | 1  | 2  | 1 | STK11 (6794)                                                                                                                                              |
| 1215 | Pfeiffer_syndrome                             | Skeletal         | 2  | 9  | 4 | FGFR1 (2260), FGFR2 (2263)                                                                                                                                |
| 1216 | Phenylketonuria                               | Metabolic        | 3  | 1  | 1 | PAH (5053), QDPR (5860), PTS (5805)                                                                                                                       |
| 1217 | Phenylthiocarbamide_tasting                   | Ear,Nose,Throat  | 1  | 0  | 0 | TAS2R38 (5726)                                                                                                                                            |
| 1218 | Pheochromocytoma                              | Cancer           | 3  | 7  | 2 | SDHD (6392), VHL (7428), SDHB (6390)                                                                                                                      |
| 1220 | Phosphoglycerate_dehydrogenase_deficiency     | Metabolic        | 1  | 0  | 0 | PHGDH (26227)                                                                                                                                             |

|      |                                                                           |                            |    |    |   |                                                                                                                                                                  |
|------|---------------------------------------------------------------------------|----------------------------|----|----|---|------------------------------------------------------------------------------------------------------------------------------------------------------------------|
| 1221 | Phosphoribosyl_pyrophosphate_synthetase-related_gout                      | Metabolic                  | 1  | 0  | 0 | PRPS1 (5631)                                                                                                                                                     |
| 1222 | Phosphorylase_kinase_deficiency_of_liver_and_muscle,_a_utosomal_recessive | Metabolic                  | 1  | 0  | 0 | PHKB (5257)                                                                                                                                                      |
| 1223 | Phosphoserine_phosphatase_deficiency                                      | Metabolic                  | 1  | 0  | 0 | PSPH (5723)                                                                                                                                                      |
| 1225 | Pick_disease                                                              | Neurological               | 1  | 2  | 1 | PSEN1 (5663)                                                                                                                                                     |
| 1226 | Piebaldism                                                                | Dermatological             | 1  | 5  | 2 | KIT (3815)                                                                                                                                                       |
| 1227 | Pigmentation_of_hair_skin_and_eyes_variation_in                           | Dermatological             | 1  | 1  | 1 | SLC45A2 (51151)                                                                                                                                                  |
| 1229 | Pigmented_paravenous_chorioretinal_atrophy                                | Ophthalmological           | 1  | 2  | 1 | CRB1 (23418)                                                                                                                                                     |
| 1230 | Pilomatrixoma                                                             | Cancer                     | 1  | 3  | 1 | CTNNA1 (1499)                                                                                                                                                    |
| 1232 | Pituitary_ACTH-secreting_adenoma                                          | Cancer                     | 3  | 6  | 3 | GNAI2 (2771), GNAS (2778), THRA (7067)                                                                                                                           |
| 1233 | Placental_abruption                                                       | Unclassified               | 1  | 3  | 2 | NOS3 (4846)                                                                                                                                                      |
| 1234 | Plasmin_inhibitor_deficiency                                              | Hematological              | 1  | 0  | 0 | SERPINF2 (5345)                                                                                                                                                  |
| 1235 | Plasminogen_deficiency                                                    | Hematological              | 1  | 1  | 1 | PLG (5340)                                                                                                                                                       |
| 1237 | Platelet_defect/deficiency                                                | Hematological              | 4  | 5  | 4 | PLA2G7 (7941), P2RY12 (64805), RUNX1 (861), CD36 (948)                                                                                                           |
| 1238 | Pneumonitis_desquamative_interstitial                                     | Respiratory                | 1  | 2  | 1 | SFTPC (6440)                                                                                                                                                     |
| 1239 | Pneumothorax_primary_spontaneous                                          | Respiratory                | 1  | 3  | 2 | FLCN (201163)                                                                                                                                                    |
| 1241 | Polycystic_kidney_disease                                                 | Renal                      | 4  | 0  | 0 | PKHD1 (5314), PKD1 (5310), PKD2 (5311), PKDTS (8132)                                                                                                             |
| 1242 | Polycythemia                                                              | Hematological              | 2  | 6  | 2 | VHL (7428), JAK2 (3717)                                                                                                                                          |
| 1243 | Polydactyly                                                               | Skeletal                   | 1  | 3  | 1 | GLI3 (2737)                                                                                                                                                      |
| 1244 | Polymicrogyria                                                            | Neurological               | 1  | 0  | 0 | GPR56 (9289)                                                                                                                                                     |
| 1245 | Polyposis                                                                 | Cancer                     | 2  | 3  | 1 | BMPR1A (657), SMAD4 (4089)                                                                                                                                       |
| 1246 | Popliteal_pterygium_syndrome                                              | multiple                   | 1  | 2  | 2 | IRF6 (3664)                                                                                                                                                      |
| 1247 | Porencephaly                                                              | Neurological               | 1  | 0  | 0 | COL4A1 (1282)                                                                                                                                                    |
| 1249 | Porphyria                                                                 | Metabolic                  | 6  | 2  | 1 | ALAD (210), HMBS (3145), UROS (7390), UROD (7389), HFE (3077), PPOX (5498)                                                                                       |
| 1253 | PPM-X_syndrome                                                            | Neurological               | 1  | 4  | 3 | MECP2 (4204)                                                                                                                                                     |
| 1254 | Prader-Willi_syndrome                                                     | multiple                   | 2  | 0  | 0 | NDN (4692), SNRPN (6638)                                                                                                                                         |
| 1256 | Precocious_puberty_male                                                   | Developmental              | 1  | 4  | 4 | LHCGR (3973)                                                                                                                                                     |
| 1257 | Preeclampsia                                                              | Cardiovascular             | 3  | 3  | 3 | STOX1 (219736), EPHX1 (2052), AGT (183)                                                                                                                          |
| 1259 | Prekallikrein_deficiency                                                  | Hematological              | 1  | 0  | 0 | KLKB1 (3818)                                                                                                                                                     |
| 1260 | Premature_ovarian_failure                                                 | Renal                      | 2  | 1  | 0 | DIAPH2 (1730), FOXL2 (668)                                                                                                                                       |
| 1261 | Primary_lateral_sclerosis                                                 | Neurological               | 1  | 2  | 1 | ALS2 (57679)                                                                                                                                                     |
| 1263 | Prion_disease_with_protracted_course                                      | Neurological               | 1  | 4  | 2 | PRNP (5621)                                                                                                                                                      |
| 1265 | Progressive_external_ophthalmoplegia_with_mitochondrial_DNA_deletions     | Ophthalmological           | 3  | 2  | 2 | PEO1 (56652), POLG (5428), SLC25A4 (291)                                                                                                                         |
| 1266 | Proguanil_poor_metabolizer                                                | Metabolic                  | 1  | 2  | 1 | CYP2C19 (1557)                                                                                                                                                   |
| 1267 | Prolactinoma_hyperparathyroidism_carcinoid_syndrome                       | Endocrine                  | 1  | 7  | 2 | MEN1 (4221)                                                                                                                                                      |
| 1268 | Prolidase_deficiency                                                      | Connective_tissue_disorder | 1  | 0  | 0 | PEPD (5184)                                                                                                                                                      |
| 1270 | Properdin_deficiency                                                      | Immunological              | 1  | 0  | 0 | PFC (5199)                                                                                                                                                       |
| 1271 | Propionicacidemia                                                         | Metabolic                  | 2  | 0  | 0 | PCCA (5095), PCCB (5096)                                                                                                                                         |
| 1272 | Prostate_cancer                                                           | Cancer                     | 12 | 20 | 4 | RNASEL (6041), BRCA2 (675), PTEN (5728), AR (367), CHEK2 (11200), MSR1 (4481), EPHB2 (2048), KLF6 (1316), MAD1L1 (8379), ATBF1 (463), ELAC2 (60528), MXI1 (4601) |
| 1273 | Protein_S_deficiency                                                      | Hematological              | 1  | 0  | 0 | PROS1 (5627)                                                                                                                                                     |
| 1274 | Proteinuria                                                               | Renal                      | 1  | 3  | 2 | CLCN5 (1184)                                                                                                                                                     |
| 1276 | Protoporphyrin                                                            | Metabolic                  | 1  | 0  | 0 | FECH (2235)                                                                                                                                                      |
| 1277 | Proud_syndrome                                                            | multiple                   | 1  | 5  | 1 | ARX (170302)                                                                                                                                                     |



|      |                                                             |                            |    |    |   |                                                                                                                                                                                                                                                                                                                                                                                                                       |
|------|-------------------------------------------------------------|----------------------------|----|----|---|-----------------------------------------------------------------------------------------------------------------------------------------------------------------------------------------------------------------------------------------------------------------------------------------------------------------------------------------------------------------------------------------------------------------------|
| 1278 | Pseudoachondroplasia                                        | Skeletal                   | 1  | 1  | 1 | COMP (1311)                                                                                                                                                                                                                                                                                                                                                                                                           |
| 1279 | Pseudohermaphroditism, male                                 | Developmental              | 2  | 4  | 4 | HSD17B3 (3293), LHCGR (3973)                                                                                                                                                                                                                                                                                                                                                                                          |
| 1281 | Pseudohypoadosteronism                                      | Endocrine                  | 6  | 2  | 2 | SCNN1A (6337), SCNN1B (6338), SCNN1G (6340), NR3C2 (4306), WNK4 (65266), WNK1 (65125)                                                                                                                                                                                                                                                                                                                                 |
| 1282 | Pseudohypoparathyroidism                                    | Endocrine                  | 1  | 5  | 3 | GNAS (2778)                                                                                                                                                                                                                                                                                                                                                                                                           |
| 1283 | Pseudovaginal_perineoscrotal_hypospadias                    | Unclassified               | 1  | 0  | 0 | SRD5A2 (6716)                                                                                                                                                                                                                                                                                                                                                                                                         |
| 1284 | Pseudovitamin_D_deficiency_rickets_1                        | Bone                       | 1  | 0  | 0 | CYP27B1 (1594)                                                                                                                                                                                                                                                                                                                                                                                                        |
| 1285 | Pseudoxanthoma_elasticum                                    | Connective_tissue_disorder | 1  | 0  | 0 | ABCC6 (368)                                                                                                                                                                                                                                                                                                                                                                                                           |
| 1288 | Psoriasis                                                   | Dermatological             | 2  | 3  | 2 | PSORS6 (63869), CARD15 (64127)                                                                                                                                                                                                                                                                                                                                                                                        |
| 1291 | Pulmonary_fibrosis                                          | Respiratory                | 4  | 2  | 1 | CSF2RB (1439), SFTPC (6440), SFTPB (6439), SFTPA1 (6435)                                                                                                                                                                                                                                                                                                                                                              |
| 1293 | Pycnodysostosis                                             | Skeletal                   | 1  | 0  | 0 | CTSK (1513)                                                                                                                                                                                                                                                                                                                                                                                                           |
| 1294 | Pyloric_stenosis_infantile_hypertrophic                     | Developmental              | 1  | 0  | 0 | NOS1 (4842)                                                                                                                                                                                                                                                                                                                                                                                                           |
| 1295 | Pyogenic_sterile_arthritis_pyoderma_gangrenosum_and_acne    | Dermatological             | 1  | 0  | 0 | PSTPIP1 (9051)                                                                                                                                                                                                                                                                                                                                                                                                        |
| 1296 | Pyropoikilocytosis                                          | Hematological              | 1  | 2  | 1 | SPTA1 (6708)                                                                                                                                                                                                                                                                                                                                                                                                          |
| 1297 | Pyruvate_dehydrogenase_deficiency                           | Metabolic                  | 3  | 1  | 1 | PC (5091), PDHA1 (5160), PDHB (5162)                                                                                                                                                                                                                                                                                                                                                                                  |
| 1298 | Rabson-Mendenhall_syndrome                                  | multiple                   | 1  | 2  | 2 | INSR (3643)                                                                                                                                                                                                                                                                                                                                                                                                           |
| 1301 | Radioulnar_synostosis_with_amegakaryocytic_thrombocytopenia | multiple                   | 1  | 0  | 0 | HOXA11 (3207)                                                                                                                                                                                                                                                                                                                                                                                                         |
| 1303 | RAPADILINO_syndrome                                         | multiple                   | 1  | 1  | 0 | RECQL4 (9401)                                                                                                                                                                                                                                                                                                                                                                                                         |
| 1304 | Rapid_progression_to_AIDS_from_HIV1_infection               | Immunological              | 1  | 0  | 0 | CX3CR1 (1524)                                                                                                                                                                                                                                                                                                                                                                                                         |
| 1305 | Rapp-Hodgkin_syndrome                                       | multiple                   | 1  | 5  | 1 | TP73L (8626)                                                                                                                                                                                                                                                                                                                                                                                                          |
| 1306 | Red_hair/fair_skin                                          | Dermatological             | 1  | 3  | 3 | MC1R (4157)                                                                                                                                                                                                                                                                                                                                                                                                           |
| 1307 | Refsum_disease                                              | Neurological               | 5  | 3  | 1 | PEX7 (5191), PHYH (5264), PEX1 (5189), PEX26 (55670), PXMP3 (5828)                                                                                                                                                                                                                                                                                                                                                    |
| 1308 | Renal_cell_carcinoma                                        | Cancer                     | 7  | 8  | 4 | FLCN (201163), RNF139 (11236), OGG1 (4968), PRCC (5546), TFE3 (7030), MET (4233), VHL (7428)                                                                                                                                                                                                                                                                                                                          |
| 1309 | Renpenning_syndrome                                         | Neurological               | 1  | 0  | 0 | PQBP1 (10084)                                                                                                                                                                                                                                                                                                                                                                                                         |
| 1311 | Response_to_morphine-6-glucuronide                          | Neurological               | 1  | 0  | 0 | OPRM1 (4988)                                                                                                                                                                                                                                                                                                                                                                                                          |
| 1312 | Resting_heart_rate                                          | Cardiovascular             | 1  | 1  | 1 | ADRB1 (153)                                                                                                                                                                                                                                                                                                                                                                                                           |
| 1314 | Restrictive_dermopathy_lethal                               | Dermatological             | 1  | 1  | 0 | ZMPSTE24 (10269)                                                                                                                                                                                                                                                                                                                                                                                                      |
| 1315 | Retinal_cone_dys trophy                                     | Ophthalmological           | 4  | 1  | 1 | NRL (4901), PROM1 (8842), C1QTNF5 (114902), LRAT (9227)                                                                                                                                                                                                                                                                                                                                                               |
| 1316 | Retinitis_pigmentosa                                        | Ophthalmological           | 30 | 16 | 2 | IMPDH1 (3614), PRPF31 (26121), RP1 (6101), CRB1 (23418), PRPF8 (10594), TULP1 (7287), CA4 (762), PRPF3 (9129), ABCA4 (24), RPE65 (6121), RP2 (6102), CERKL (375298), NRL (4901), FSCN2 (25794), RPGR (6103), RHO (6010), RDS (5961), RP9 (6100), RLBP1 (6017), USH2A (7399), RGR (5995), CNGB1 (1258), CNGA1 (1259), PDE6A (5145), PDE6B (5158), ROM1 (6094), AIPL1 (23746), NR2E3 (10002), CRX (1406), MERTK (10461) |
| 1317 | Retinoblastoma                                              | Cancer                     | 1  | 1  | 1 | RB1 (5925)                                                                                                                                                                                                                                                                                                                                                                                                            |
| 1318 | Retinol_binding_protein_deficiency_of                       | Ophthalmological           | 1  | 0  | 0 | RBP4 (5950)                                                                                                                                                                                                                                                                                                                                                                                                           |
| 1320 | Retinoschisis                                               | Ophthalmological           | 1  | 0  | 0 | RS1 (6247)                                                                                                                                                                                                                                                                                                                                                                                                            |
| 1321 | Rett_syndrome                                               | Neurological               | 2  | 4  | 3 | MECP2 (4204), CDKL5 (6792)                                                                                                                                                                                                                                                                                                                                                                                            |
| 1322 | Rhabdoid_tumors                                             | Cancer                     | 1  | 0  | 0 | SMARCB1 (6598)                                                                                                                                                                                                                                                                                                                                                                                                        |
| 1323 | Rhabdomyosarcoma                                            | Cancer                     | 4  | 4  | 1 | SLC22A18 (5002), FOXO1A (2308), PAX3 (5077), PAX7 (5081)                                                                                                                                                                                                                                                                                                                                                              |
| 1324 | Rheumatoid_arthritis                                        | Connective_tissue_disorder | 8  | 8  | 5 | IL10 (3586), CIITA (4261), NFKBIL1 (4795), PADI4 (23569), PTPN22 (26191), RUNX1 (861), SLC22A4 (6583), MIF (4282)                                                                                                                                                                                                                                                                                                     |
| 1325 | Rhizomelic_chondrodysplasia_punctata                        | multiple                   | 2  | 1  | 1 | PEX7 (5191), AGPS (8540)                                                                                                                                                                                                                                                                                                                                                                                              |

|      |                                                               |                            |   |   |   |                                                                                                                            |
|------|---------------------------------------------------------------|----------------------------|---|---|---|----------------------------------------------------------------------------------------------------------------------------|
| 1326 | Rh-mod_syndrome                                               | Hematological              | 1 | 1 | 1 | RHAG (6005)                                                                                                                |
| 1327 | Rh-negative_blood_type                                        | Hematological              | 2 | 1 | 1 | RHD (6007), RHCE (6006)                                                                                                    |
| 1329 | Ribose_5-phosphate_isomerase_deficiency                       | Metabolic                  | 1 | 0 | 0 | RPIA (22934)                                                                                                               |
| 1330 | Rickets                                                       | Bone                       | 2 | 0 | 0 | CYP2R1 (120227), VDR (7421)                                                                                                |
| 1331 | Rieger_syndrome                                               | multiple                   | 2 | 5 | 1 | FOXC1 (2296), PITX2 (5308)                                                                                                 |
| 1332 | Ring_dermoid_of_cornea                                        | Ophthalmological           | 1 | 2 | 1 | PITX2 (5308)                                                                                                               |
| 1333 | Rippling_muscle_disease                                       | Muscular                   | 1 | 4 | 3 | CAV3 (859)                                                                                                                 |
| 1334 | Roberts_syndrome                                              | Developmental              | 1 | 0 | 0 | ESCO2 (157570)                                                                                                             |
| 1335 | Robinow_syndrome_autosomal_recessive                          | multiple                   | 1 | 1 | 1 | ROR2 (4920)                                                                                                                |
| 1337 | Rokitansky-Kuster-Hauser_syndrome                             | Developmental              | 1 | 0 | 0 | WNT4 (54361)                                                                                                               |
| 1338 | Rothmund-Thomson_syndrome                                     | multiple                   | 1 | 1 | 0 | RECQL4 (9401)                                                                                                              |
| 1339 | Roussy-Levy_syndrome                                          | multiple                   | 2 | 3 | 1 | MPZ (4359), PMP22 (5376)                                                                                                   |
| 1341 | Rubenstein-Taybi_syndrome                                     | multiple                   | 2 | 1 | 1 | CREBBP (1387), EP300 (2033)                                                                                                |
| 1344 | Saethre-Chatzen_syndrome                                      | Developmental              | 2 | 8 | 3 | FGFR2 (2263), TWIST1 (7291)                                                                                                |
| 1345 | Salivary_adenoma                                              | Cancer                     | 1 | 2 | 1 | HMGA2 (8091)                                                                                                               |
| 1346 | Salla_disease                                                 | Metabolic                  | 1 | 1 | 1 | SLC17A5 (26503)                                                                                                            |
| 1347 | Sandhoff_disease_infantile_juvenile_and_adult_forms           | Metabolic                  | 1 | 1 | 1 | HEXB (3074)                                                                                                                |
| 1348 | Sanfilippo_syndrome                                           | Metabolic                  | 2 | 0 | 0 | SGSH (6448), NAGLU (4669)                                                                                                  |
| 1349 | Sarcoidosis                                                   | Immunological              | 3 | 3 | 2 | CARD15 (64127), BTNL2 (56244), HLA-DRB1 (3123)                                                                             |
| 1350 | Sarcoma_synovial                                              | Cancer                     | 2 | 0 | 0 | SSX1 (6756), SSX2 (6757)                                                                                                   |
| 1352 | SARS_progression_of                                           | Immunological              | 1 | 5 | 4 | ACE (1636)                                                                                                                 |
| 1354 | Schimke_immunoosseous_dysplasia                               | Connective_tissue_disorder | 1 | 0 | 0 | SMARCAL1 (50485)                                                                                                           |
| 1355 | Schindler_disease                                             | Metabolic                  | 1 | 1 | 1 | NAGA (4668)                                                                                                                |
| 1357 | Schizencephaly                                                | Neurological               | 1 | 0 | 0 | EMX2 (2018)                                                                                                                |
| 1359 | Schizophrenia                                                 | Psychiatric                | 9 | 7 | 5 | DISC1 (27185), TAAR6 (319100), APP (351), COMT (1312), HTR2A (3356), RTN4R (65078), SYN2 (6854), ENTH (9685), PRODH (5625) |
| 1360 | Schwannomatosis                                               | Cancer                     | 1 | 2 | 1 | NF2 (4771)                                                                                                                 |
| 1361 | Schwartz-Jampel_syndrome_type_1                               | multiple                   | 1 | 1 | 1 | HSPG2 (3339)                                                                                                               |
| 1362 | SCID                                                          | Immunological              | 1 | 0 | 0 | JAK3 (3718)                                                                                                                |
| 1363 | Scleroosteosis                                                | Skeletal                   | 1 | 0 | 0 | SOST (50964)                                                                                                               |
| 1365 | Scurvy                                                        | Nutritional                | 1 | 0 | 0 | GULOP (2989)                                                                                                               |
| 1366 | Sea-blue_histiocyte_disease                                   | Hematological              | 1 | 3 | 3 | APOE (348)                                                                                                                 |
| 1367 | Seasonal_affective_disorder                                   | Psychiatric                | 1 | 4 | 3 | HTR2A (3356)                                                                                                               |
| 1368 | Sebastian_syndrome                                            | Hematological              | 1 | 4 | 2 | MYH9 (4627)                                                                                                                |
| 1369 | Seckel_syndrome                                               | Developmental              | 1 | 0 | 0 | ATR (545)                                                                                                                  |
| 1370 | Segawa_syndrome                                               | Neurological               | 1 | 0 | 0 | TH (7054)                                                                                                                  |
| 1371 | Seizures                                                      | Neurological               | 1 | 0 | 0 | SCN2A1 (6325)                                                                                                              |
| 1372 | Selective_T-cell_defect                                       | Immunological              | 1 | 0 | 0 | ZAP70 (7535)                                                                                                               |
| 1373 | Self-healing_collodion_baby                                   | Dermatological             | 1 | 2 | 1 | TGM1 (7051)                                                                                                                |
| 1374 | SEMD_Pakistani_type                                           | Connective_tissue_disorder | 1 | 0 | 0 | PAPSS2 (9060)                                                                                                              |
| 1375 | Senior-Loken_syndrome                                         | Renal                      | 3 | 2 | 1 | NPHP1 (4867), NPHP4 (261734), IQCB1 (9657)                                                                                 |
| 1376 | Sensory_ataxic_neuropathy_dysarthria_and_ophthalmopa<br>resis | Ophthalmological           | 1 | 2 | 2 | POLG (5428)                                                                                                                |
| 1377 | Sepiapterin_reductase_deficiency                              | Metabolic                  | 1 | 0 | 0 | SPR (6697)                                                                                                                 |
| 1378 | Sepsis                                                        | Immunological              | 2 | 4 | 3 | CASP12P1 (120329), TNF (7124)                                                                                              |
| 1380 | Septooptic_dysplasia                                          | multiple                   | 1 | 1 | 1 | HESX1 (8820)                                                                                                               |

|      |                                           |                  |    |   |                                                                                                                                                                                                  |
|------|-------------------------------------------|------------------|----|---|--------------------------------------------------------------------------------------------------------------------------------------------------------------------------------------------------|
| 1381 | Sertoli-cell-only_syndrome                | Renal            | 1  | 0 | 0 USP26 (83844)                                                                                                                                                                                  |
| 1383 | Severe_combined_immunodeficiency          | Immunological    | 8  | 4 | 2 DCLRE1C (64421), RAG1 (5896), RAG2 (5897), ADA (100), PTPRC (5788), IL7R (3575), CD3D (915), IL2RG (3561)                                                                                      |
| 1384 | Sex_reversal                              | Unclassified     | 1  | 1 | 1 NR5A1 (2516)                                                                                                                                                                                   |
| 1385 | Sezary_syndrome                           | Cancer           | 1  | 4 | 1 BCL10 (8915)                                                                                                                                                                                   |
| 1386 | Shah-Waardenburg_syndrome                 | multiple         | 1  | 2 | 2 EDN3 (1908)                                                                                                                                                                                    |
| 1387 | Short_stature                             | Skeletal         | 3  | 3 | 1 GHR (2690), SHOX (6473), LHX4 (89884)                                                                                                                                                          |
| 1388 | Shprintzen-Goldberg_syndrome              | multiple         | 1  | 5 | 3 FBN1 (2200)                                                                                                                                                                                    |
| 1389 | Shwachman-Diamond_syndrome                | multiple         | 1  | 0 | 0 SBDS (51119)                                                                                                                                                                                   |
| 1391 | Sialidosis                                | Metabolic        | 2  | 1 | 1 SLC17A5 (26503), NEU1 (4758)                                                                                                                                                                   |
| 1392 | Sialuria                                  | Metabolic        | 1  | 2 | 1 GNE (10020)                                                                                                                                                                                    |
| 1393 | Sickle_cell_anemia                        | Hematological    | 1  | 5 | 1 HBB (3043)                                                                                                                                                                                     |
| 1394 | Sick_sinus_syndrome                       | Cardiovascular   | 1  | 4 | 1 SCN5A (6331)                                                                                                                                                                                   |
| 1396 | Silver_spastic_paraplegia_syndrome        | Neurological     | 1  | 2 | 2 BSCL2 (26580)                                                                                                                                                                                  |
| 1397 | Simpson-Golabi-Behmel_syndrome            | multiple         | 1  | 1 | 1 GPC3 (2719)                                                                                                                                                                                    |
| 1398 | Sitosterolemia                            | Metabolic        | 2  | 0 | 0 ABCG5 (64240), ABCG8 (64241)                                                                                                                                                                   |
| 1399 | Situs_ambiguus                            | Developmental    | 2  | 1 | 0 NODAL (4838), DNAH11 (8701)                                                                                                                                                                    |
| 1400 | Sjogren-Larsson_syndrome                  | Metabolic        | 1  | 0 | 0 ALDH3A2 (224)                                                                                                                                                                                  |
| 1401 | Skin_fragility-woolly_hair_syndrome       | Dermatological   | 1  | 4 | 2 DSP (1832)                                                                                                                                                                                     |
| 1403 | Slow_acetylation                          | Metabolic        | 1  | 0 | 0 NAT2 (10)                                                                                                                                                                                      |
| 1404 | Slowed_nerve_conduction_velocity_AD       | Neurological     | 1  | 0 | 0 ARHGEF10 (9639)                                                                                                                                                                                |
| 1406 | Small_patella_syndrome                    | Skeletal         | 1  | 0 | 0 TBX4 (9496)                                                                                                                                                                                    |
| 1408 | SMED_Strudwick_type                       | Skeletal         | 1  | 5 | 4 COL2A1 (1280)                                                                                                                                                                                  |
| 1409 | Smith-Fineman-Myers_syndrome              | multiple         | 1  | 4 | 1 ATRX (546)                                                                                                                                                                                     |
| 1410 | Smith-Lemli-Opitz_syndrome                | multiple         | 1  | 0 | 0 DHCR7 (1717)                                                                                                                                                                                   |
| 1411 | Smith-Magenis_syndrome                    | multiple         | 1  | 0 | 0 RAI1 (10743)                                                                                                                                                                                   |
| 1412 | Smith-McCort_dysplasia                    | Skeletal         | 1  | 1 | 0 DYM (54808)                                                                                                                                                                                    |
| 1414 | Solitary_median_maxillary_central_incisor | Skeletal         | 1  | 2 | 2 SHH (6469)                                                                                                                                                                                     |
| 1415 | Somatotrophinoma                          | Endocrine        | 1  | 5 | 3 GNAS (2778)                                                                                                                                                                                    |
| 1416 | Sorsby_fundus_dystrophy                   | Ophthalmological | 1  | 0 | 0 TIMP3 (7078)                                                                                                                                                                                   |
| 1417 | Sotos_syndrome                            | Developmental    | 1  | 2 | 1 NSD1 (64324)                                                                                                                                                                                   |
| 1418 | Spastic_ataxia/paraplegia                 | Neurological     | 9  | 3 | 1 SACS (26278), ALS2 (57679), KIF5A (3798), HSPD1 (3329), PLP1 (5354), SPG3A (51062), SPAST (6683), NIPA1 (123606), SPG7 (6687)                                                                  |
| 1419 | Specific_language_impairment_QTL          | Neurological     | 1  | 0 | 0 FOXP2 (93986)                                                                                                                                                                                  |
| 1422 | Spermatogenic_failure                     | Renal            | 1  | 0 | 0 DAZL (1618)                                                                                                                                                                                    |
| 1423 | Spherocytosis                             | Hematological    | 5  | 6 | 2 SPTB (6710), ANK1 (286), SLC4A1 (6521), EPB42 (2038), SPTA1 (6708)                                                                                                                             |
| 1425 | Spina_bifida                              | Developmental    | 3  | 4 | 2 MTHFD1 (4522), MTR (4548), MTRR (4552)                                                                                                                                                         |
| 1426 | Spinal_muscular_atrophy                   | Muscular         | 7  | 9 | 4 AR (367), VAPB (9217), SMN1 (6606), BSCL2 (26580), GARS (2617), HEXB (3074), IGHMBP2 (3508)                                                                                                    |
| 1428 | Spinocerebellar_ataxia                    | Neurological     | 13 | 5 | 1 ATXN10 (25814), ATXN1 (6310), PPP2R2B (5521), PRKCG (5582), TBP (6908), ATXN2 (6311), SCA25 (338435), FGF14 (2259), PLEKHG4 (25894), CACNA1A (773), ATXN7 (6314), KLHL1AS (6315), TDP1 (55775) |
| 1430 | Split-hand/foot_malformation              | Skeletal         | 2  | 5 | 1 FBXW4 (6468), TP73L (8626)                                                                                                                                                                     |
| 1432 | Spondylocarpotarsal_synostosis_syndrome   | Skeletal         | 1  | 2 | 2 FLNB (2317)                                                                                                                                                                                    |
| 1433 | Spondylocostal_dysostosis                 | Skeletal         | 2  | 0 | 0 DLL3 (10683), MESP2 (145873)                                                                                                                                                                   |
| 1435 | Spondyloepiphyseal_dysplasia              | Skeletal         | 5  | 3 | 2 MATN3 (4148), AGC1 (176), CHST3 (9469), TRAPPC2 (6399), WISP3 (8838)                                                                                                                           |

|      |                                                            |                  |   |   |   |                                                                 |
|------|------------------------------------------------------------|------------------|---|---|---|-----------------------------------------------------------------|
| 1436 | Spondylometaphyseal_dysplasia                              | Skeletal         | 1 | 1 | 1 | COL10A1 (1300)                                                  |
| 1437 | Squamous_cell_carcinoma                                    | Cancer           | 3 | 1 | 1 | FAS (355), ING1 (3621), TNFRSF10B (8795)                        |
| 1438 | Stapes_ankylosis_syndrome_without_symphalangism            | multiple         | 1 | 3 | 1 | NOG (9241)                                                      |
| 1439 | Stargardt_disease                                          | Ophthalmological | 2 | 4 | 1 | ABCA4 (24), ELOVL4 (6785)                                       |
| 1440 | Startle_disease                                            | Neurological     | 1 | 1 | 1 | GLRA1 (2741)                                                    |
| 1441 | STAT1_deficiency                                           | Unclassified     | 1 | 1 | 1 | STAT1 (6772)                                                    |
| 1442 | Statins                                                    | Metabolic        | 1 | 0 | 0 | HMGCR (3156)                                                    |
| 1444 | Steatocystoma_multiplex                                    | Dermatological   | 1 | 1 | 1 | KRT17 (3872)                                                    |
| 1445 | Stem-cell_leukemia/lymphoma_syndrome                       | Cancer           | 1 | 0 | 0 | ZNF198 (7750)                                                   |
| 1446 | Stevens-Johnson_syndrome,_carbamazepine-induced            | Dermatological   | 1 | 2 | 2 | HLA-B (3106)                                                    |
| 1447 | Stickler_syndrome                                          | multiple         | 3 | 9 | 5 | COL2A1 (1280), COL11A1 (1301), COL11A2 (1302)                   |
| 1449 | Stomach_cancer                                             | Cancer           | 1 | 5 | 1 | KRAS (3845)                                                     |
| 1454 | Stroke                                                     | Cardiovascular   | 2 | 1 | 1 | PDE4D (5144), ALOX5AP (241)                                     |
| 1455 | Stuve-Wiedemann_syndrome/Schwartz-Jampel_type_2_syndrome   | multiple         | 1 | 0 | 0 | LIFR (3977)                                                     |
| 1456 | Subcortical_laminar_heterotopia                            | Neurological     | 2 | 1 | 1 | DCX (1641), PAFAH1B1 (5048)                                     |
| 1457 | Succinic_semialdehyde_dehydrogenase_deficiency             | Metabolic        | 1 | 0 | 0 | ALDH5A1 (7915)                                                  |
| 1458 | Sucrose_intolerance                                        | Metabolic        | 1 | 0 | 0 | SI (6476)                                                       |
| 1459 | Sudden_infant_death_with_dysgenesis_of_the_testes_syndrome | Unclassified     | 1 | 0 | 0 | TSPYL1 (7259)                                                   |
| 1460 | Sulfite_oxidase_deficiency                                 | Metabolic        | 1 | 0 | 0 | SUOX (6821)                                                     |
| 1461 | Superoxide_dismutase,_elevated_extracellular               | Unclassified     | 1 | 0 | 0 | SOD3 (6649)                                                     |
| 1462 | Supranuclear_palsy                                         | Neurological     | 1 | 3 | 1 | MAPT (4137)                                                     |
| 1463 | Supravalvar_aortic_stenosis                                | Cardiovascular   | 1 | 2 | 1 | ELN (2006)                                                      |
| 1464 | Surfactant_deficiency                                      | Respiratory      | 2 | 2 | 1 | ABCA3 (21), SFTPC (6440)                                        |
| 1465 | Sutherland-Haan_syndrome-like                              | multiple         | 1 | 4 | 1 | ATRX (546)                                                      |
| 1466 | Sweat_chloride_elevation_without_CF                        | Unclassified     | 1 | 4 | 3 | CFTR (1080)                                                     |
| 1467 | Symphalangism,_proximal                                    | Skeletal         | 1 | 3 | 1 | NOG (9241)                                                      |
| 1468 | Syndactyly                                                 | Skeletal         | 1 | 3 | 2 | GJA1 (2697)                                                     |
| 1469 | Synostoses_syndrome                                        | multiple         | 1 | 3 | 1 | NOG (9241)                                                      |
| 1470 | Synpolydactyly                                             | Skeletal         | 2 | 1 | 1 | FBLN1 (2192), HOXD13 (3239)                                     |
| 1471 | Systemic_lupus_erythematosus                               | Immunological    | 4 | 2 | 2 | FASLG (356), DNASE1 (1773), PTPN22 (26191), PDCD1 (5133)        |
| 1472 | Tall_stature                                               | Skeletal         | 1 | 1 | 1 | MCM6 (4175)                                                     |
| 1473 | Tangier_disease                                            | Metabolic        | 1 | 3 | 3 | ABCA1 (19)                                                      |
| 1475 | Tarsal-carpal_coalition_syndrome                           | Skeletal         | 1 | 3 | 1 | NOG (9241)                                                      |
| 1476 | Tauopathy_and_respiratory_failure                          | Neurological     | 1 | 3 | 1 | MAPT (4137)                                                     |
| 1477 | Tay-Sachs_disease                                          | Metabolic        | 1 | 2 | 1 | HEXA (3073)                                                     |
| 1478 | T-cell_lymphoblastic_leukemia                              | Cancer           | 2 | 4 | 2 | BAX (581), ATM (472)                                            |
| 1480 | Temperature-sensitive_apoptosis,_cellular                  | Unclassified     | 1 | 0 | 0 | DAD1 (1603)                                                     |
| 1482 | Tetra-amelia,_autosomal_recessive                          | multiple         | 1 | 0 | 0 | WNT3 (7473)                                                     |
| 1483 | Tetralogy_of_Fallot                                        | Cardiovascular   | 3 | 4 | 2 | JAG1 (182), ZFPM2 (23414), NKX2-5 (1482)                        |
| 1486 | Thalassemias                                               | Hematological    | 5 | 8 | 1 | HBA2 (3040), HBB (3043), HBD (3045), LCRB (387281), HBA1 (3039) |
| 1490 | Thanatophoric_dysplasia,_types_I_and_II                    | Skeletal         | 1 | 7 | 2 | FGFR3 (2261)                                                    |
| 1491 | Thiamine-responsive_megaloblastic_anemia_syndrome          | Hematological    | 1 | 0 | 0 | SLC19A2 (10560)                                                 |
| 1493 | Thrombocythemia                                            | Hematological    | 2 | 2 | 1 | JAK2 (3717), THPO (7066)                                        |
| 1494 | Thrombocytopenia                                           | Hematological    | 4 | 4 | 2 | MASTL (84930), MPL (4352), WAS (7454), F5 (2153)                |

|      |                                               |                  |    |    |   |                                                                                                                                                            |
|------|-----------------------------------------------|------------------|----|----|---|------------------------------------------------------------------------------------------------------------------------------------------------------------|
| 1497 | Thrombophilia                                 | Hematological    | 9  | 7  | 3 | F5 (2153), SERPIND1 (3053), HRG (3273), PROC (5624), THBD (7056), FGB (2244), FGG (2266), CBS (875), ADAMTS13 (11093)                                      |
| 1502 | Thymine-uraciluria                            | Metabolic        | 1  | 1  | 1 | DPYD (1806)                                                                                                                                                |
| 1503 | Thyroid_carcinoma                             | Cancer           | 11 | 26 | 4 | TSHR (7253), TP53 (7157), MINPP1 (9562), PTEN (5728), HRAS (3265), GOLGA5 (9950), NCOA4 (8031), PCM1 (5108), PRKAR1A (5573), TRIM33 (51592), TRIM24 (8805) |
| 1504 | Thyrototoxic_periodic_paralysis               | Endocrine        | 1  | 2  | 2 | CACNA1S (779)                                                                                                                                              |
| 1505 | Thyrotropin-releasing_hormone_deficiency      | Endocrine        | 1  | 0  | 0 | TRHR (7201)                                                                                                                                                |
| 1506 | Thyroxine-binding_globulin_deficiency         | Hematological    | 1  | 0  | 0 | SERPINA7 (6906)                                                                                                                                            |
| 1508 | Tietz_syndrome                                | multiple         | 1  | 1  | 0 | MITF (4286)                                                                                                                                                |
| 1509 | Timothy_syndrome                              | multiple         | 1  | 0  | 0 | CACNA1C (775)                                                                                                                                              |
| 1510 | Toenail_dystrophy_isolated                    | Dermatological   | 1  | 3  | 1 | COL7A1 (1294)                                                                                                                                              |
| 1511 | Tolbutamide_poor_metabolizer                  | Unclassified     | 1  | 1  | 1 | CYP2C9 (1559)                                                                                                                                              |
| 1514 | Townes-Brocks_syndrome                        | multiple         | 1  | 0  | 0 | SALL1 (6299)                                                                                                                                               |
| 1515 | Transaldolase_deficiency                      | Metabolic        | 1  | 0  | 0 | TALDO1 (6888)                                                                                                                                              |
| 1516 | Transcobalamin_II_deficiency                  | Hematological    | 1  | 0  | 0 | TCN2 (6948)                                                                                                                                                |
| 1518 | Transient_bullous_of_the_newborn              | Dermatological   | 1  | 3  | 1 | COL7A1 (1294)                                                                                                                                              |
| 1519 | Transposition_of_great_arteries_dextro-looped | Developmental    | 2  | 2  | 1 | CFC1 (55997), THRAP2 (23389)                                                                                                                               |
| 1520 | Treacher_Collins_mandibulofacial_dysostosis   | Developmental    | 1  | 0  | 0 | TCOF1 (6949)                                                                                                                                               |
| 1521 | Tremor_familial_essential                     | Neurological     | 1  | 0  | 0 | HS1BP3 (64342)                                                                                                                                             |
| 1522 | Trichodontoosseous_syndrome                   | multiple         | 1  | 1  | 1 | DLX3 (1747)                                                                                                                                                |
| 1524 | Trichorhinophalangeal_syndrome                | Developmental    | 1  | 0  | 0 | TRPS1 (7227)                                                                                                                                               |
| 1525 | Trichothiodystrophy                           | Dermatological   | 4  | 2  | 1 | ERCC3 (2071), ERCC2 (2068), GTF2H5 (404672), C7orf11 (136647)                                                                                              |
| 1526 | Trifunctional_protein_deficiency              | Metabolic        | 2  | 3  | 1 | HADHA (3030), HADHB (3032)                                                                                                                                 |
| 1528 | Trismus-pseudocomptodactyly_syndrome          | multiple         | 1  | 1  | 0 | MYH8 (4626)                                                                                                                                                |
| 1529 | Tropical_calcific_pancreatitis                | Gastrointestinal | 1  | 2  | 1 | SPINK1 (6690)                                                                                                                                              |
| 1530 | Troyer_syndrome                               | Neurological     | 1  | 0  | 0 | SPG20 (23111)                                                                                                                                              |
| 1533 | Tuberculosis                                  | Respiratory      | 2  | 6  | 2 | IFNGR1 (3459), IFNG (3458)                                                                                                                                 |
| 1534 | Tuberous_sclerosis                            | multiple         | 3  | 5  | 4 | IFNG (3458), TSC1 (7248), TSC2 (7249)                                                                                                                      |
| 1536 | Turcot_syndrome                               | Cancer           | 3  | 9  | 1 | APC (324), MLH1 (4292), PMS2 (5395)                                                                                                                        |
| 1538 | Twinning_dizygotic                            | Unclassified     | 1  | 3  | 2 | FSHR (2492)                                                                                                                                                |
| 1540 | Tyrosinemia                                   | Metabolic        | 3  | 0  | 0 | FAH (2184), TAT (6898), HPD (3242)                                                                                                                         |
| 1542 | Ullrich_congenital_muscular_dystrophy         | Muscular         | 3  | 1  | 1 | COL6A1 (1291), COL6A3 (1293), COL6A2 (1292)                                                                                                                |
| 1543 | Ulnar-mammary_syndrome                        | multiple         | 1  | 0  | 0 | TBX3 (6926)                                                                                                                                                |
| 1544 | Unipolar_depression                           | Psychiatric      | 1  | 0  | 0 | TPH2 (121278)                                                                                                                                              |
| 1545 | Unna-Thost_disease_nonepidermolytic           | Dermatological   | 1  | 4  | 1 | KRT1 (3848)                                                                                                                                                |
| 1550 | Urolithiasis                                  | Metabolic        | 2  | 1  | 1 | APRT (353), SLC34A1 (6569)                                                                                                                                 |
| 1551 | Usher_syndrome                                | multiple         | 8  | 3  | 3 | MYO7A (4647), USH1C (10083), CDH23 (64072), PCDH15 (65217), USH1G (124590), USH2A (7399), USH3A (7401), MASS1 (84059)                                      |
| 1552 | Uterine_leiomyoma                             | Cancer           | 1  | 2  | 1 | HMGA2 (8091)                                                                                                                                               |
| 1553 | UV-induced_skin_damage                        | Dermatological   | 1  | 3  | 3 | MC1R (4157)                                                                                                                                                |
| 1554 | van_Buchem_disease                            | Unclassified     | 1  | 6  | 2 | LRP5 (4041)                                                                                                                                                |
| 1555 | VATER_association_with_hydrocephalus          | multiple         | 1  | 8  | 2 | PTEN (5728)                                                                                                                                                |
| 1556 | Velocardiofacial_syndrome                     | multiple         | 1  | 2  | 1 | TBX1 (6899)                                                                                                                                                |
| 1557 | Venous_thrombosis                             | Cardiovascular   | 2  | 0  | 0 | TEK (7010), SERPINA10 (51156)                                                                                                                              |
| 1558 | Ventricular_tachycardia                       | Cardiovascular   | 3  | 2  | 2 | GNAI2 (2771), CASQ2 (845), RYR2 (6262)                                                                                                                     |
| 1559 | Vertical_talus                                | Skeletal         | 1  | 1  | 1 | HOXD10 (3236)                                                                                                                                              |

|      |                                               |                            |    |    |   |                                                                                                                                                         |
|------|-----------------------------------------------|----------------------------|----|----|---|---------------------------------------------------------------------------------------------------------------------------------------------------------|
| 1562 | Viral_infection                               | Immunological              | 2  | 1  | 1 | FCGR3A (2214), OAS1 (4938)                                                                                                                              |
| 1563 | Virilization                                  | Developmental              | 1  | 1  | 1 | CYP19A1 (1588)                                                                                                                                          |
| 1565 | Vitamin_K-dependent_coagulation_defect        | Hematological              | 2  | 1  | 1 | VKORC1 (79001), GGCX (2677)                                                                                                                             |
| 1566 | Vitelliform_macular_dystrophy                 | Ophthalmological           | 1  | 2  | 1 | VMD2 (7439)                                                                                                                                             |
| 1570 | VLCAD_deficiency                              | Metabolic                  | 1  | 0  | 0 | ACADVL (37)                                                                                                                                             |
| 1571 | Vohwinkel_syndrome                            | multiple                   | 2  | 6  | 2 | GJB2 (2706), LOR (4014)                                                                                                                                 |
| 1572 | von_Hippel-Lindau_syndrome                    | Cancer                     | 2  | 6  | 2 | CCND1 (595), VHL (7428)                                                                                                                                 |
| 1573 | Waardenburg-Shah_syndrome                     | multiple                   | 2  | 4  | 2 | EDNRB (1910), SOX10 (6663)                                                                                                                              |
| 1574 | Waardenburg_syndrome                          | multiple                   | 4  | 4  | 2 | TYR (7299), MITF (4286), PAX3 (5077), SNAI2 (6591)                                                                                                      |
| 1575 | Wagner_syndrome                               | Ophthalmological           | 1  | 5  | 3 | COL2A1 (1280)                                                                                                                                           |
| 1576 | WAGR_syndrome                                 | multiple                   | 1  | 4  | 2 | WT1 (7490)                                                                                                                                              |
| 1578 | Walker-Warburg_syndrome                       | multiple                   | 3  | 1  | 1 | FCMD (2218), POMT1 (10585), RAB3GAP1 (22930)                                                                                                            |
| 1580 | Warfarin_resistance/sensitivity               | Hematological              | 3  | 3  | 2 | VKORC1 (79001), CYP2C9 (1559), F9 (2158)                                                                                                                |
| 1581 | Watson_syndrome                               | Cancer                     | 1  | 4  | 1 | NF1 (4763)                                                                                                                                              |
| 1582 | Weaver_syndrome                               | Developmental              | 1  | 2  | 1 | NSD1 (64324)                                                                                                                                            |
| 1583 | Wegener_granulomatosis                        | Immunological              | 1  | 1  | 1 | TAP2 (6891)                                                                                                                                             |
| 1585 | Weill-Marchesani_syndrome                     | Connective_tissue_disorder | 2  | 5  | 3 | FBN1 (2200), ADAMTS10 (81794)                                                                                                                           |
| 1586 | Weissenbacher-Zweymuller_syndrome             | Connective_tissue_disorder | 1  | 3  | 2 | COL11A2 (1302)                                                                                                                                          |
| 1588 | Werner_syndrome                               | multiple                   | 1  | 0  | 0 | WRN (7486)                                                                                                                                              |
| 1589 | Wernicke-Korsakoff_syndrome                   | Metabolic                  | 1  | 0  | 0 | TKT (7086)                                                                                                                                              |
| 1590 | Weyers_acrocentric_dysostosis                 | Skeletal                   | 1  | 1  | 1 | EVC (2121)                                                                                                                                              |
| 1591 | WHIM_syndrome                                 | Immunological              | 1  | 1  | 1 | CXCR4 (7852)                                                                                                                                            |
| 1592 | White_sponge_nevus                            | Connective_tissue_disorder | 2  | 0  | 0 | KRT13 (3860), KRT4 (3851)                                                                                                                               |
| 1594 | Williams-Beuren_syndrome                      | multiple                   | 1  | 2  | 2 | ELN (2006)                                                                                                                                              |
| 1595 | Wilms_tumor                                   | Cancer                     | 4  | 9  | 2 | BRCA2 (675), GPC3 (2719), POU6F2 (11281), WT1 (7490)                                                                                                    |
| 1596 | Wilson_disease                                | Metabolic                  | 1  | 0  | 0 | ATP7B (540)                                                                                                                                             |
| 1598 | Wiskott-Aldrich_syndrome                      | Immunological              | 1  | 2  | 1 | WAS (7454)                                                                                                                                              |
| 1599 | Witkop_syndrome                               | Developmental              | 1  | 2  | 2 | MSX1 (4487)                                                                                                                                             |
| 1600 | Wolcott-Rallison_syndrome                     | Bone                       | 1  | 0  | 0 | EIF2AK3 (9451)                                                                                                                                          |
| 1601 | Wolff-Parkinson-White_syndrome                | Cardiovascular             | 1  | 1  | 1 | PRKAG2 (51422)                                                                                                                                          |
| 1603 | Wolfram_syndrome                              | Metabolic                  | 1  | 1  | 1 | WFS1 (7466)                                                                                                                                             |
| 1604 | Wolman_disease                                | Metabolic                  | 1  | 1  | 1 | LIPA (3988)                                                                                                                                             |
| 1607 | Xanthinuria_type_I                            | Metabolic                  | 1  | 0  | 0 | XDH (7498)                                                                                                                                              |
| 1608 | Xeroderma_pigmentosum                         | Dermatological             | 8  | 2  | 1 | XPA (7507), ERCC3 (2071), XPC (7508), ERCC2 (2068), DDB2 (1643), ERCC4 (2072), ERCC5 (2073), POLH (5429)                                                |
| 1610 | X-inactivation_familial_skewed                | Unclassified               | 1  | 0  | 0 | XIST (7503)                                                                                                                                             |
| 1611 | XLA_and_isolated_growth_hormone_deficiency    | Immunological              | 1  | 1  | 1 | BTK (695)                                                                                                                                               |
| 1613 | Yellow_nail_syndrome                          | Immunological              | 1  | 1  | 1 | FOXC2 (2303)                                                                                                                                            |
| 1614 | Yemenite_deaf-blind_hypopigmentation_syndrome | multiple                   | 1  | 2  | 1 | SOX10 (6663)                                                                                                                                            |
| 1615 | Zellweger_syndrome                            | multiple                   | 11 | 2  | 1 | PEX1 (5189), PEX10 (5192), PEX13 (5194), PEX14 (5195), PEX26 (55670), PEX19 (5824), PEX5 (5830), ABCD3 (5825), PXPMP3 (5828), PEX16 (9409), PEX3 (8504) |
| 1617 | Zlotogora-Ogur_syndrome                       | multiple                   | 1  | 2  | 2 | PVRL1 (5818)                                                                                                                                            |
| 2053 | Adrenal_adenoma                               | Cancer                     | 1  | 7  | 2 | MEN1 (4221)                                                                                                                                             |
| 2054 | Adrenal_cortical_carcinoma                    | Cancer                     | 1  | 10 | 1 | TP53 (7157)                                                                                                                                             |
| 2055 | Adrenocortical_insufficiency                  | Endocrine                  | 1  | 1  | 1 | NR5A1 (2516)                                                                                                                                            |
| 2074 | Alcohol_intolerance                           | Metabolic                  | 1  | 0  | 0 | ALDH2 (217)                                                                                                                                             |

|      |                                                                            |                  |   |   |   |                                                                  |
|------|----------------------------------------------------------------------------|------------------|---|---|---|------------------------------------------------------------------|
| 2112 | Aneurysm, familial arterial                                                | Unclassified     | 1 | 1 | 1 | COL3A1 (1281)                                                    |
| 2174 | Autoimmune thyroid disease                                                 | Endocrine        | 1 | 2 | 1 | TG (7038)                                                        |
| 2188 | Basal cell nevus syndrome                                                  | multiple         | 1 | 2 | 2 | PTCH (5727)                                                      |
| 2265 | Carcinoid tumor of lung                                                    | Cancer           | 1 | 7 | 2 | MEN1 (4221)                                                      |
| 2287 | Central core disease                                                       | Muscular         | 2 | 3 | 3 | RYR1 (6261), MYH7 (4625)                                         |
| 2291 | Cerebral arteriopathy with subcortical infarcts and leukoencephalopathy    | Cardiovascular   | 1 | 0 | 0 | NOTCH3 (4854)                                                    |
| 2315 | Chondrodysplasia, Grebe type                                               | Skeletal         | 1 | 3 | 1 | GDF5 (8200)                                                      |
| 2327 | Chronic infections, due to opsonin defect                                  | Immunological    | 1 | 1 | 1 | MBL2 (4153)                                                      |
| 2344 | Cold-induced sweating syndrome                                             | multiple         | 1 | 0 | 0 | CRLF1 (9244)                                                     |
| 2350 | Combined hyperlipemia                                                      | Metabolic        | 1 | 2 | 1 | LPL (4023)                                                       |
| 2354 | Congenital bilateral absence of vas deferens                               | Unclassified     | 1 | 4 | 3 | CFTR (1080)                                                      |
| 2365 | Coronary spasms                                                            | Cardiovascular   | 1 | 3 | 3 | NOS3 (4846)                                                      |
| 2385 | Creatine deficiency syndrome, X-linked                                     | Neurological     | 1 | 1 | 1 | SLC6A8 (6535)                                                    |
| 2427 | Diabetes insipidus                                                         | Endocrine        | 3 | 1 | 1 | AVPR2 (554), AQP2 (359), AVP (551)                               |
| 2440 | DNA ligase I deficiency                                                    | multiple         | 1 | 0 | 0 | LIG1 (3978)                                                      |
| 2584 | Giant cell hepatitis                                                       | Gastrointestinal | 1 | 0 | 0 | CYP7B1 (9420)                                                    |
| 2628 | Growth retardation                                                         | Developmental    | 1 | 0 | 0 | IGF1 (3479)                                                      |
| 2669 | Hereditary persistence of fetal hemoglobin                                 | Hematological    | 1 | 0 | 0 | AFP (174)                                                        |
| 2785 | Hypoplastic left heart syndrome                                            | Cardiovascular   | 1 | 3 | 2 | GJA1 (2697)                                                      |
| 2903 | Lipoid proteinosis                                                         | Metabolic        | 1 | 0 | 0 | ECM1 (1893)                                                      |
| 2937 | Macular dystrophy                                                          | Ophthalmological | 5 | 8 | 1 | CHST6 (4166), RDS (5961), ABCA4 (24), ELOVL4 (6785), VMD2 (7439) |
| 2969 | Medullary thyroid carcinoma                                                | Cancer           | 2 | 5 | 4 | RET (5979), NTRK1 (4914)                                         |
| 3016 | Mitochondrial DNA depletion myopathy                                       | Muscular         | 1 | 0 | 0 | TK2 (7084)                                                       |
| 3037 | Multiple cutaneous and uterine leiomyomata                                 | Cancer           | 1 | 2 | 2 | FH (2271)                                                        |
| 3079 | Neonatal ichthyosis-sclerosing cholangitis syndrome                        | multiple         | 1 | 0 | 0 | CLDN1 (9076)                                                     |
| 3144 | Optic nerve coloboma with renal disease                                    | multiple         | 1 | 1 | 1 | PAX2 (5076)                                                      |
| 3171 | Ovarian dysgenesis                                                         | Endocrine        | 2 | 3 | 3 | FSHR (2492), BMP15 (9210)                                        |
| 3178 | Pancreatic agenesis                                                        | Gastrointestinal | 1 | 2 | 1 | IPF1 (3651)                                                      |
| 3195 | Paroxysmal nocturnal hemoglobinuria                                        | Hematological    | 1 | 0 | 0 | PIGA (5277)                                                      |
| 3212 | Persistent hyperinsulinemic hypoglycemia of infancy                        | Metabolic        | 1 | 1 | 1 | KCNJ11 (3767)                                                    |
| 3229 | Pigmented adrenocortical disease, primary isolated                         | Cancer           | 1 | 4 | 2 | PRKAR1A (5573)                                                   |
| 3232 | Pituitary anomalies with holoprosencephaly-like features                   | multiple         | 1 | 0 | 0 | GLI2 (2736)                                                      |
| 3241 | Polycystic liver disease                                                   | Gastrointestinal | 2 | 0 | 0 | PRKCSH (5589), SEC63 (11231)                                     |
| 3260 | Premature chromosome condensation with microcephaly and mental retardation | Neurological     | 1 | 1 | 1 | MCPH1 (79648)                                                    |
| 3308 | Renal glucosuria                                                           | Renal            | 1 | 0 | 0 | SLC5A2 (6524)                                                    |
| 3419 | Specific granule deficiency                                                | Immunological    | 1 | 0 | 0 | CEBPE (1053)                                                     |
| 3478 | T-cell immunodeficiency, congenital alopecia, and nail dystrophy           | Immunological    | 1 | 0 | 0 | FOXP1 (8456)                                                     |
| 3503 | Thyroid hormone resistance                                                 | Endocrine        | 2 | 3 | 1 | TPO (7173), THRB (7068)                                          |
| 3512 | Total iodide organification defect                                         | Endocrine        | 1 | 3 | 1 | TPO (7173)                                                       |
| 3554 | van der Woude syndrome                                                     | Developmental    | 1 | 2 | 1 | IRF6 (3664)                                                      |
| 3558 | Ventricular fibrillation, idiopathic                                       | Cardiovascular   | 1 | 4 | 1 | SCN5A (6331)                                                     |
| 3572 | von Willebrand disease                                                     | Hematological    | 1 | 0 | 0 | VWF (7450)                                                       |

|      |                                                                                        |                  |   |    |   |                                                                           |
|------|----------------------------------------------------------------------------------------|------------------|---|----|---|---------------------------------------------------------------------------|
| 4188 | Basal_ganglia_disease                                                                  | Neurological     | 2 | 1  | 1 | FTL (2512), SLC19A3 (80704)                                               |
| 4289 | Cerebellar_hypoplasia,_VLDLR-associated                                                | Neurological     | 1 | 0  | 0 | VLDLR (7436)                                                              |
| 4291 | Cerebral_cavernous_malformations                                                       | Neurological     | 3 | 2  | 2 | KRIT1 (889), CCM2 (83605), PDCD10 (11235)                                 |
| 4350 | Combined_immunodeficiency                                                              | Immunological    | 2 | 2  | 1 | C6 (729), IL2RG (3561)                                                    |
| 4354 | Congenital_cataracts                                                                   | Ophthalmological | 1 | 0  | 0 | CTDP1 (9150)                                                              |
| 4666 | Hepatic_lipase_deficiency                                                              | Metabolic        | 1 | 0  | 0 | LIPC (3990)                                                               |
| 5016 | Mitochondrial_DNA_depletion_syndrome                                                   | multiple         | 2 | 0  | 0 | SUCLA2 (8803), DGUOK (1716)                                               |
| 5037 | Multiple_malignancy_syndrome                                                           | Cancer           | 1 | 10 | 1 | TP53 (7157)                                                               |
| 5144 | Optic_nerve_hypoplasia/aplasia                                                         | Ophthalmological | 1 | 9  | 3 | PAX6 (5080)                                                               |
| 5170 | Ovarian_hyperstimulation_syndrome                                                      | Endocrine        | 1 | 3  | 3 | FSHR (2492)                                                               |
| 5232 | Pituitary_hormone_deficiency                                                           | Endocrine        | 4 | 1  | 0 | POU1F1 (5449), PROP1 (5626), HESX1 (8820), LHX3 (8022)                    |
| 5233 | Placental_steroid_sulfatase_deficiency                                                 | Metabolic        | 1 | 1  | 1 | STS (412)                                                                 |
| 5291 | Pulmonary_hypertension,_familial_primary                                               | Cardiovascular   | 1 | 0  | 0 | BMPR2 (659)                                                               |
| 5308 | Renal_hypoplasia,_isolated                                                             | Renal            | 1 | 1  | 0 | PAX2 (5076)                                                               |
| 6291 | Cerebral_dysgenesis,_neuropathy,_ichthyosis,_and_palmo<br>plantar_keratoderma_syndrome | Neurological     | 1 | 0  | 0 | SNAP29 (9342)                                                             |
| 6350 | Combined_oxidative_phosphorylation_deficiency                                          | multiple         | 1 | 0  | 0 | GFM1 (85476)                                                              |
| 7016 | Mitochondrial_myopathy_and_sideroblastic_anemia                                        | multiple         | 1 | 0  | 0 | PUS1 (80324)                                                              |
| 7170 | Ovarian_sex_cord_tumors                                                                | Cancer           | 1 | 3  | 2 | FSHR (2492)                                                               |
| 7232 | Pituitary_tumor,_invasive                                                              | Cancer           | 1 | 0  | 0 | PRKCA (5578)                                                              |
| 7308 | Renal_tubular_acidosis                                                                 | Renal            | 5 | 4  | 1 | SLC4A1 (6521), ATP6V0A4 (50617), CA2 (760), SLC4A4 (8671), ATP6V1B1 (525) |
| 8350 | Combined_SAP_deficiency                                                                | Metabolic        | 1 | 2  | 2 | PSAP (5660)                                                               |
| 9037 | Multiple_myeloma                                                                       | Cancer           | 2 | 1  | 0 | IRF4 (3662), LIG4 (3981)                                                  |
| 9038 | Multiple_sclerosis                                                                     | Neurological     | 2 | 3  | 2 | CIITA (4261), PTPRC (5788)                                                |
| 9039 | Multiple_sulfatase_deficiency                                                          | Metabolic        | 1 | 0  | 0 | SUMF1 (285362)                                                            |
| 9308 | Renal_tubular_dysgenesis                                                               | Renal            | 4 | 8  | 4 | ACE (1636), AGTR1 (185), AGT (183), REN (5972)                            |
