# Supplementary material
Source: PubMed Central journal article supplement (PMC1885563)
Supplement: pnas_0701361104_12.pdf [file pnas_0701361104_12.pdf]

Supporting Information Table 3. **Network characteristics of disease genes.**

Class of disease gene is assigned if all the implicated diseases are of same class, otherwise, it is assigned "Grey."

| Entrez ID | Symbol   | Disorder class   | Size (s) | Degree (k) | Number of classes associated | Implicated diseases (Disease ID) [comma-delimited]                                                                                |
|-----------|----------|------------------|----------|------------|------------------------------|-----------------------------------------------------------------------------------------------------------------------------------|
| 2         | A2M      | Neurological     | 1        | 11         | 1                            | Alzheimer_disease (98)                                                                                                            |
| 10        | NAT2     | Metabolic        | 1        | 0          | 1                            | Slow_acetylation (1403)                                                                                                           |
| 12        | SERPINA3 | Grey             | 2        | 0          | 1                            | Alpha-1-antichymotrypsin_deficiency (87), Cerebrovascular_disease_occlusive (294)                                                 |
| 15        | AANAT    | Psychiatric      | 1        | 0          | 1                            | Delayed_sleep_phase_syndrome (411)                                                                                                |
| 18        | ABAT     | Metabolic        | 1        | 0          | 1                            | GABA-transaminase_deficiency (564)                                                                                                |
| 19        | ABCA1    | Grey             | 4        | 7          | 3                            | Cerebral_amyloid_angiopathy (291), Coronary_artery_disease (365), HDL_cholesterol_level_QTL (644), Tangier_disease (1473)         |
| 21        | ABCA3    | Respiratory      | 1        | 1          | 1                            | Surfactant_deficiency (1464)                                                                                                      |
| 22        | ABCB7    | Hematological    | 1        | 8          | 1                            | Anemia (110)                                                                                                                      |
| 24        | ABCA4    | Ophthalmological | 5        | 36         | 1                            | Cone_dystrophy (352), Fundus_albipunctatus (562), Macular_dystrophy (2937), Retinitis_pigmentosa (1316), Stargardt_disease (1439) |
| 25        | ABL1     | Cancer           | 1        | 36         | 1                            | Leukemia (886)                                                                                                                    |
| 28        | ABO      | Hematological    | 1        | 22         | 1                            | Blood_group (212)                                                                                                                 |
| 33        | ACADL    | Metabolic        | 1        | 2          | 1                            | Acyl-CoA_dehydrogenase_deficiency_of (44)                                                                                         |
| 34        | ACADM    | Metabolic        | 1        | 2          | 1                            | Acyl-CoA_dehydrogenase_deficiency_of (44)                                                                                         |
| 35        | ACADS    | Metabolic        | 1        | 2          | 1                            | Acyl-CoA_dehydrogenase_deficiency_of (44)                                                                                         |
| 36        | ACADSB   | Metabolic        | 1        | 0          | 1                            | 2-methylbutyrylglycinuria (4)                                                                                                     |
| 37        | ACADVL   | Metabolic        | 1        | 0          | 1                            | VLCAD_deficiency (1570)                                                                                                           |
| 38        | ACAT1    | Metabolic        | 1        | 0          | 1                            | Alpha-methylacetoacetic_aciduria (90)                                                                                             |
| 43        | ACHE     | Hematological    | 1        | 22         | 1                            | Blood_group (212)                                                                                                                 |
| 58        | ACTA1    | Muscular         | 1        | 9          | 1                            | Myopathy (1059)                                                                                                                   |
| 70        | ACTC     | Cardiovascular   | 1        | 24         | 1                            | Cardiomyopathy (268)                                                                                                              |
| 71        | ACTG1    | Ear,Nose,Throat  | 1        | 40         | 1                            | Deafness (406)                                                                                                                    |
| 81        | ACTN4    | Renal            | 1        | 2          | 1                            | Glomerulosclerosis (596)                                                                                                          |
| 89        | ACTN3    | Muscular         | 2        | 0          | 1                            | Alpha-actinin-3_deficiency (88), Elite_sprint_athletic_performance (471)                                                          |
| 91        | ACVR1B   | Cancer           | 1        | 8          | 1                            | Pancreatic_cancer (1178)                                                                                                          |
| 93        | ACVR2B   | Developmental    | 1        | 1          | 1                            | Left-right_axis_malformations (874)                                                                                               |
| 94        | ACVRL1   | Cardiovascular   | 1        | 1          | 1                            | Hereditary_hemorrhagic_telangiectasia (669)                                                                                       |
| 100       | ADA      | Immunological    | 2        | 7          | 1                            | Adenosine_deaminase_deficiency (49), Severe_combined_immunodeficiency (1383)                                                      |
| 103       | ADAR     | Dermatological   | 1        | 0          | 1                            | Dyschromatosis (455)                                                                                                              |
| 118       | ADD1     | Cardiovascular   | 1        | 11         | 1                            | Hypertension (752)                                                                                                                |
| 152       | ADRA2C   | Cardiovascular   | 1        | 1          | 1                            | Congestive_heart_failure (355)                                                                                                    |
| 153       | ADRB1    | Cardiovascular   | 2        | 1          | 1                            | Congestive_heart_failure (355), Resting_heart_rate (1312)                                                                         |
| 154       | ADRB2    | Grey             | 3        | 32         | 2                            | Asthma (153), Beta-2-adrenoreceptor_agonist_reduced_response_to (198), Obesity (1126)                                             |
| 155       | ADRB3    | Nutritional      | 1        | 20         | 1                            | Obesity (1126)                                                                                                                    |
| 158       | ADSL     | Metabolic        | 1        | 0          | 1                            | Adenylosuccinase_deficiency (50)                                                                                                  |
| 174       | AFP      | Hematological    | 1        | 0          | 1                            | Hereditary_persistence_of_fetal_hemoglobin (2669)                                                                                 |
| 175       | AGA      | Metabolic        | 1        | 0          | 1                            | Aspartylglucosaminuria (150)                                                                                                      |
| 176       | AGC1     | Skeletal         | 1        | 4          | 1                            | Spondyloepiphyseal_dysplasia (1435)                                                                                               |
| 178       | AGL      | Metabolic        | 1        | 8          | 1                            | Glycogen_storage_disease (610)                                                                                                    |
| 181       | AGRP     | Nutritional      | 2        | 20         | 1                            | Leanness_inherited (872), Obesity (1126)                                                                                          |
| 182       | JAG1     | Grey             | 3        | 42         | 3                            | Alagille_syndrome (71), Deafness (406), Tetralogy_of_Falot (1483)                                                                 |
| 183       | AGT      | Grey             | 3        | 15         | 2                            | Hypertension (752), Preeclampsia (1257), Renal_tubular_dysgenesis (9308)                                                          |
| 185       | AGTR1    | Grey             | 2        | 13         | 2                            | Hypertension (752), Renal_tubular_dysgenesis (9308)                                                                               |
| 186       | AGTR2    | Neurological     | 1        | 23         | 1                            | Mental_retardation (990)                                                                                                          |
| 189       | AGXT     | Metabolic        | 1        | 1          | 1                            | Hyperoxaluria (742)                                                                                                               |

|     |         |                            |   |    |   |                                                                                                                                                                         |
|-----|---------|----------------------------|---|----|---|-------------------------------------------------------------------------------------------------------------------------------------------------------------------------|
| 190 | NR0B1   | Endocrine                  | 2 | 3  | 1 | Adrenal_hyperplasia,_congenital (53), Dosage-sensitive_sex_reversal (443)                                                                                               |
| 191 | AHCY    | Metabolic                  | 1 | 1  | 1 | Hypermethioninemia (739)                                                                                                                                                |
| 203 | AK1     | Hematological              | 1 | 9  | 1 | Hemolytic_anemia (660)                                                                                                                                                  |
| 208 | AKT2    | Endocrine                  | 1 | 26 | 1 | Diabetes_mellitus (427)                                                                                                                                                 |
| 210 | ALAD    | Metabolic                  | 2 | 5  | 1 | Lead_poisoning (871), Porphyrinemia (1249)                                                                                                                              |
| 212 | ALAS2   | Hematological              | 1 | 8  | 1 | Anemia (110)                                                                                                                                                            |
| 213 | ALB     | Hematological              | 2 | 0  | 1 | Analbuminemia (105), Dysalbuminemic_hyperthyroxinemia (453)                                                                                                             |
| 215 | ABCD1   | Grey                       | 2 | 5  | 2 | Adrenoleukodystrophy (56), Adrenomyeloneuropathy (57)                                                                                                                   |
| 217 | ALDH2   | Metabolic                  | 1 | 0  | 1 | Alcohol_intolerance (2074)                                                                                                                                              |
| 224 | ALDH3A2 | Metabolic                  | 1 | 0  | 1 | Sjogren-Larsson_syndrome (1400)                                                                                                                                         |
| 226 | ALDOA   | Metabolic                  | 1 | 0  | 1 | Aldolase_A_deficiency (76)                                                                                                                                              |
| 229 | ALDOB   | Metabolic                  | 1 | 0  | 1 | Fructose_intolerance (556)                                                                                                                                              |
| 240 | ALOX5   | Grey                       | 2 | 12 | 2 | Asthma (153), Atherosclerosis (163)                                                                                                                                     |
| 241 | ALOX5AP | Cardiovascular             | 2 | 10 | 1 | Myocardial_infarction (1054), Stroke (1454)                                                                                                                             |
| 242 | ALOX12B | Dermatological             | 1 | 2  | 1 | Ichthyosiform_erythroderma (793)                                                                                                                                        |
| 249 | ALPL    | Grey                       | 2 | 0  | 2 | Hypophosphatasia (782), Odontohypophosphatasia (1136)                                                                                                                   |
| 265 | AMELX   | Bone                       | 1 | 3  | 1 | Amelogenesis_imperfecta (99)                                                                                                                                            |
| 268 | AMH     | Developmental              | 1 | 1  | 1 | Persistent_Mullerian_duct_syndrome (1212)                                                                                                                               |
| 269 | AMHR2   | Developmental              | 1 | 1  | 1 | Persistent_Mullerian_duct_syndrome (1212)                                                                                                                               |
| 270 | AMPD1   | Muscular                   | 1 | 0  | 1 | Myoadenylate_deaminase_deficiency (1053)                                                                                                                                |
| 272 | AMPD3   | Hematological              | 1 | 0  | 1 | AMP_deaminase_deficiency (101)                                                                                                                                          |
| 275 | AMT     | Metabolic                  | 1 | 3  | 1 | Glycine_encephalopathy (608)                                                                                                                                            |
| 286 | ANK1    | Hematological              | 1 | 4  | 1 | Spherocytosis (1423)                                                                                                                                                    |
| 287 | ANK2    | Cardiovascular             | 1 | 6  | 1 | Long_QT_syndrome (912)                                                                                                                                                  |
| 291 | SLC25A4 | Ophthalmological           | 1 | 2  | 1 | Progressive_external_ophthalmoplegia_with_mitochondrial_DNA_deletions (1265)                                                                                            |
| 323 | APBB2   | Neurological               | 1 | 11 | 1 | Alzheimer_disease (98)                                                                                                                                                  |
| 324 | APC     | Cancer                     | 7 | 42 | 1 | Adenoma,_periampullary (46), Adenomas (47), Colon_cancer (346), Desmoid_disease,_hereditary (425), Gardner_syndrome (571), Gastric_cancer (572), Turcot_syndrome (1536) |
| 326 | AIRE    | Immunological              | 1 | 3  | 1 | Autoimmune_disease (174)                                                                                                                                                |
| 335 | APOA1   | Grey                       | 5 | 17 | 3 | Amyloidosis (103), Apolipoprotein_deficiency (136), Corneal_dystrophy (362), Hypertriglyceridemia (757), Hypoalphalipoproteinemia (762)                                 |
| 336 | APOA2   | Metabolic                  | 2 | 10 | 1 | Apolipoprotein_deficiency (136), Hypercholesterolemia (724)                                                                                                             |
| 338 | APOB    | Metabolic                  | 3 | 8  | 1 | Abetalipoproteinemia (17), Hypercholesterolemia (724), Hypobetalipoproteinemia (763)                                                                                    |
| 344 | APOC2   | Metabolic                  | 1 | 1  | 1 | Hyperlipoproteinemia (737)                                                                                                                                              |
| 345 | APOC3   | Metabolic                  | 1 | 3  | 1 | Apolipoprotein_deficiency (136)                                                                                                                                         |
| 348 | APOE    | Grey                       | 4 | 20 | 4 | Alzheimer_disease (98), Hyperlipoproteinemia (737), Myocardial_infarction (1054), Sea-blue_histiocyte_disease (1366)                                                    |
| 350 | APOH    | Metabolic                  | 1 | 3  | 1 | Apolipoprotein_deficiency (136)                                                                                                                                         |
| 351 | APP     | Grey                       | 3 | 24 | 2 | Alzheimer_disease (98), Amyloidosis (103), Schizophrenia (1359)                                                                                                         |
| 353 | APRT    | Metabolic                  | 1 | 1  | 1 | Urolithiasis (1550)                                                                                                                                                     |
| 355 | FAS     | Grey                       | 2 | 5  | 2 | Autoimmune_disease (174), Squamous_cell_carcinoma (1437)                                                                                                                |
| 356 | FASLG   | Immunological              | 1 | 3  | 1 | Systemic_lupus_erythematosus (1471)                                                                                                                                     |
| 358 | AQP1    | Grey                       | 2 | 22 | 1 | Aquaporin-1_deficiency (138), Blood_group (212)                                                                                                                         |
| 359 | AQP2    | Endocrine                  | 1 | 2  | 1 | Diabetes_insipidus (2427)                                                                                                                                               |
| 360 | AQP3    | Hematological              | 1 | 22 | 1 | Blood_group (212)                                                                                                                                                       |
| 367 | AR      | Grey                       | 5 | 33 | 3 | Androgen_insensitivity (109), Breast_cancer (228), Perineal_hypospadias (1205), Prostate_cancer (1272), Spinal_muscular_atrophy (1426)                                  |
| 368 | ABCC6   | Connective_tissue_disorder | 1 | 0  | 1 | Pseudoxanthoma_elasticum (1285)                                                                                                                                         |
| 383 | ARG1    | Metabolic                  | 1 | 1  | 1 | Argininemia (140)                                                                                                                                                       |

|     |          |                            |   |    |   |                                                                                                                                                                                            |
|-----|----------|----------------------------|---|----|---|--------------------------------------------------------------------------------------------------------------------------------------------------------------------------------------------|
| 401 | PHOX2A   | Ophthalmological           | 1 | 1  | 1 | Fibrosis (538)                                                                                                                                                                             |
| 405 | ARNT     | Cancer                     | 1 | 36 | 1 | Leukemia (886)                                                                                                                                                                             |
| 410 | ARSA     | Neurological               | 1 | 1  | 1 | Metachromatic_leukodystrophy (996)                                                                                                                                                         |
| 411 | ARSB     | Metabolic                  | 1 | 0  | 1 | Maroteaux-Lamy_syndrome (952)                                                                                                                                                              |
| 412 | STS      | Grey                       | 2 | 6  | 2 | Ichthyosis (794), Placental_steroid_sulfatase_deficiency (5233)                                                                                                                            |
| 415 | ARSE     | Connective_tissue_disorder | 1 | 2  | 1 | Chondrodysplasia_punctata (315)                                                                                                                                                            |
| 420 | DO       | Hematological              | 1 | 22 | 1 | Blood_group (212)                                                                                                                                                                          |
| 427 | ASAH1    | Metabolic                  | 1 | 0  | 1 | Farber_lipogranulomatosis (526)                                                                                                                                                            |
| 435 | ASL      | Metabolic                  | 1 | 1  | 1 | Argininemia (140)                                                                                                                                                                          |
| 443 | ASPA     | Metabolic                  | 1 | 0  | 1 | Canavan_disease (258)                                                                                                                                                                      |
| 445 | ASS      | Metabolic                  | 1 | 1  | 1 | Citrullinemia (335)                                                                                                                                                                        |
| 462 | SERPINC1 | Hematological              | 1 | 0  | 1 | Antithrombin_III_deficiency (127)                                                                                                                                                          |
| 463 | ATBF1    | Cancer                     | 1 | 11 | 1 | Prostate_cancer (1272)                                                                                                                                                                     |
| 471 | ATIC     | Metabolic                  | 1 | 0  | 1 | AICA-ribosiduria_due_to_ATIC_deficiency (69)                                                                                                                                               |
| 472 | ATM      | Grey                       | 4 | 28 | 2 | Ataxia-telangiectasia (157), Breast_cancer (228), Lymphoma (925), T-cell_lymphoblastic_leukemia (1478)                                                                                     |
| 477 | ATP1A2   | Neurological               | 2 | 3  | 1 | Alternating_hemiplegia_of_childhood (96), Migraine (1013)                                                                                                                                  |
| 478 | ATP1A3   | Neurological               | 1 | 5  | 1 | Dystonia (462)                                                                                                                                                                             |
| 486 | FXD2     | Renal                      | 1 | 2  | 1 | Hypomagnesemia (778)                                                                                                                                                                       |
| 487 | ATP2A1   | Muscular                   | 1 | 0  | 1 | Brody_myopathy (231)                                                                                                                                                                       |
| 488 | ATP2A2   | Dermatological             | 2 | 0  | 1 | Acrokeratosis_verruciformis (36), Darier_disease (404)                                                                                                                                     |
| 491 | ATP2B2   | Ear,Nose,Throat            | 1 | 40 | 1 | Deafness (406)                                                                                                                                                                             |
| 525 | ATP6V1B1 | Renal                      | 1 | 4  | 1 | Renal_tubular_acidosis (7308)                                                                                                                                                              |
| 538 | ATP7A    | Grey                       | 3 | 2  | 3 | Cutis_laxa (395), Menkes_disease (988), Occipital_horn_syndrome (1129)                                                                                                                     |
| 540 | ATP7B    | Metabolic                  | 1 | 0  | 1 | Wilson_disease (1596)                                                                                                                                                                      |
| 545 | ATR      | Developmental              | 1 | 0  | 1 | Seckel_syndrome (1369)                                                                                                                                                                     |
| 546 | ATRX     | Grey                       | 5 | 0  | 2 | Alpha-thalassemia/mental_retardation_syndrome (92), Chudley-Lowry_syndrome (328), Juberg-Marsidi_syndrome (832), Smith-Fineman-Myers_syndrome (1409), Sutherland-Haan_syndrome-like (1465) |
| 549 | AUH      | Metabolic                  | 1 | 0  | 1 | 3-methylglutaconic_aciduria (8)                                                                                                                                                            |
| 551 | AVP      | Endocrine                  | 1 | 2  | 1 | Diabetes_insipidus (2427)                                                                                                                                                                  |
| 554 | AVPR2    | Grey                       | 2 | 2  | 2 | Diabetes_insipidus (2427), Nephrogenic_syndrome_of_inappropriate_antidiuresis (1080)                                                                                                       |
| 570 | BAAT     | Gastrointestinal           | 1 | 2  | 1 | Hypercholanemia (723)                                                                                                                                                                      |
| 580 | BARD1    | Cancer                     | 1 | 18 | 1 | Breast_cancer (228)                                                                                                                                                                        |
| 581 | BAX      | Cancer                     | 2 | 34 | 1 | Colon_cancer (346), T-cell_lymphoblastic_leukemia (1478)                                                                                                                                   |
| 582 | BBS1     | multiple                   | 1 | 7  | 1 | Bardet-Biedl_syndrome (183)                                                                                                                                                                |
| 583 | BBS2     | multiple                   | 1 | 7  | 1 | Bardet-Biedl_syndrome (183)                                                                                                                                                                |
| 585 | BBS4     | multiple                   | 1 | 7  | 1 | Bardet-Biedl_syndrome (183)                                                                                                                                                                |
| 590 | BCHE     | Unclassified               | 1 | 0  | 0 | Apnea_postanesthetic (134)                                                                                                                                                                 |
| 593 | BCKDHA   | Metabolic                  | 1 | 3  | 1 | Maple_syrup_urine_disease (948)                                                                                                                                                            |
| 594 | BCKDHB   | Metabolic                  | 1 | 3  | 1 | Maple_syrup_urine_disease (948)                                                                                                                                                            |
| 595 | CCND1    | Cancer                     | 3 | 70 | 1 | Colon_cancer (346), Leukemia (886), von_Hippel-Lindau_syndrome (1572)                                                                                                                      |
| 596 | BCL2     | Cancer                     | 1 | 36 | 1 | Leukemia (886)                                                                                                                                                                             |
| 605 | BCL7A    | Cancer                     | 1 | 0  | 1 | B-cell_non-Hodgkin_lymphoma_high-grade (190)                                                                                                                                               |
| 606 | BCL8     | Cancer                     | 1 | 9  | 1 | Lymphoma (925)                                                                                                                                                                             |
| 611 | OPN1SW   | Ophthalmological           | 1 | 2  | 1 | Colorblindness (348)                                                                                                                                                                       |
| 613 | BCR      | Cancer                     | 1 | 36 | 1 | Leukemia (886)                                                                                                                                                                             |
| 617 | BCS1L    | Grey                       | 3 | 14 | 3 | GRACILE_syndrome (622), Leigh_syndrome (877), Mitochondrial_complex_deficiency (1016)                                                                                                      |
| 627 | BDNF     | Grey                       | 3 | 6  | 3 | Central_hypoventilation_syndrome (287), Memory_impairment (984), Obsessive-compulsive_disorder (1128)                                                                                      |
| 641 | BLM      | Cancer                     | 1 | 0  | 1 | Bloom_syndrome (213)                                                                                                                                                                       |
| 642 | BLMH     | Neurological               | 1 | 11 | 1 | Alzheimer_disease (98)                                                                                                                                                                     |

|     |          |                  |   |    |   |                                                                                                                                |
|-----|----------|------------------|---|----|---|--------------------------------------------------------------------------------------------------------------------------------|
| 657 | BMPR1A   | Cancer           | 2 | 2  | 1 | Cowden_disease (372), Polyposis (1245)                                                                                         |
| 658 | BMPR1B   | Skeletal         | 1 | 4  | 1 | Brachydactyly (224)                                                                                                            |
| 659 | BMPR2    | Cardiovascular   | 1 | 0  | 1 | Pulmonary_hypertension,_familial_primary (5291)                                                                                |
| 668 | FOXL2    | Grey             | 2 | 1  | 2 | Blepharophimosis,_epicanthus_inversus,_and_ptosis (210), Premature_ovarian_failure (1260)                                      |
| 669 | BPGM     | Hematological    | 1 | 9  | 1 | Hemolytic_anemia (660)                                                                                                         |
| 672 | BRCA1    | Cancer           | 3 | 23 | 1 | Breast_cancer (228), Ovarian_cancer (1170), Papillary_serous_carcinoma_of_the_peritoneum (1183)                                |
| 673 | BRAF     | Cancer           | 4 | 41 | 1 | Adenocarcinoma (45), Colon_cancer (346), Melanoma (978), Nonsmall_cell_lung_cancer (1115)                                      |
| 675 | BRCA2    | Grey             | 5 | 45 | 2 | Breast_cancer (228), Fanconi_anemia (523), Pancreatic_cancer (1178), Prostate_cancer (1272), Wilms_tumor (1595)                |
| 682 | BSG      | Hematological    | 1 | 22 | 1 | Blood_group (212)                                                                                                              |
| 686 | BTD      | Metabolic        | 1 | 0  | 1 | Biotinidase_deficiency (203)                                                                                                   |
| 695 | BTK      | Grey             | 2 | 3  | 2 | Agammaglobulinemia (63), XLA_and_isolated_growth_hormone_deficiency (1611)                                                     |
| 699 | BUB1     | Cancer           | 1 | 33 | 1 | Colon_cancer (346)                                                                                                             |
| 701 | BUB1B    | Cancer           | 1 | 33 | 1 | Colon_cancer (346)                                                                                                             |
| 710 | SERPING1 | Immunological    | 1 | 1  | 1 | Angioedema (114)                                                                                                               |
| 712 | C1QA     | Immunological    | 1 | 12 | 1 | Complementary_component_deficiency (240)                                                                                       |
| 713 | C1QB     | Immunological    | 1 | 12 | 1 | Complementary_component_deficiency (240)                                                                                       |
| 714 | C1QG     | Immunological    | 1 | 12 | 1 | Complementary_component_deficiency (240)                                                                                       |
| 716 | C1S      | Immunological    | 1 | 12 | 1 | Complementary_component_deficiency (240)                                                                                       |
| 717 | C2       | Immunological    | 1 | 12 | 1 | Complementary_component_deficiency (240)                                                                                       |
| 718 | C3       | Immunological    | 1 | 12 | 1 | Complementary_component_deficiency (240)                                                                                       |
| 720 | C4A      | Immunological    | 1 | 12 | 1 | Complementary_component_deficiency (240)                                                                                       |
| 721 | C4B      | Immunological    | 1 | 12 | 1 | Complementary_component_deficiency (240)                                                                                       |
| 729 | C6       | Immunological    | 2 | 13 | 1 | Complementary_component_deficiency (240), Combined_immunodeficiency (4350)                                                     |
| 730 | C7       | Immunological    | 1 | 12 | 1 | Complementary_component_deficiency (240)                                                                                       |
| 732 | C8B      | Immunological    | 1 | 12 | 1 | Complementary_component_deficiency (240)                                                                                       |
| 735 | C9       | Immunological    | 1 | 12 | 1 | Complementary_component_deficiency (240)                                                                                       |
| 760 | CA2      | Renal            | 1 | 4  | 1 | Renal_tubular_acidosis (7308)                                                                                                  |
| 762 | CA4      | Ophthalmological | 1 | 29 | 1 | Retinitis_pigmentosa (1316)                                                                                                    |
| 773 | CACNA1A  | Neurological     | 4 | 14 | 1 | Cerebellar_ataxia (289), Episodic_ataxia (497), Hemiplegic_migraine,_familial (656), Spinocerebellar_ataxia (1428)             |
| 775 | CACNA1C  | multiple         | 1 | 0  | 1 | Timothy_syndrome (1509)                                                                                                        |
| 778 | CACNA1F  | Ophthalmological | 1 | 4  | 1 | Night_blindness (1110)                                                                                                         |
| 779 | CACNA1S  | Grey             | 3 | 3  | 3 | Hypokalemic_periodic_paralysis (776), Malignant_hyperthermia_susceptibility (942), Thyrotoxic_periodic_paralysis (1504)        |
| 785 | CACNB4   | Neurological     | 2 | 20 | 1 | Ataxia (154), Epilepsy (495)                                                                                                   |
| 788 | SLC25A20 | Metabolic        | 1 | 0  | 1 | Carnitine-acylcarnitine_translocase_deficiency (271)                                                                           |
| 796 | CALCA    | Bone             | 1 | 5  | 1 | Osteoporosis (1163)                                                                                                            |
| 799 | CALCR    | Bone             | 1 | 5  | 1 | Osteoporosis (1163)                                                                                                            |
| 825 | CAPN3    | Muscular         | 1 | 17 | 1 | Muscular_dystrophy (1040)                                                                                                      |
| 841 | CASP8    | Grey             | 2 | 10 | 2 | Autoimmune_disease (174), Hepatic_adenoma (668)                                                                                |
| 843 | CASP10   | Grey             | 3 | 12 | 2 | Autoimmune_disease (174), Gastric_cancer (572), Non-Hodgkin_lymphoma (1114)                                                    |
| 845 | CASQ2    | Cardiovascular   | 1 | 2  | 1 | Ventricular_tachycardia (1558)                                                                                                 |
| 846 | CASR     | Endocrine        | 3 | 2  | 1 | Hyperparathyroidism (743), Hypocalcemia (764), Hypocalciuric_hypercalcemia (765)                                               |
| 847 | CAT      | Hematological    | 1 | 0  | 1 | Acatlasemia (21)                                                                                                               |
| 859 | CAV3     | Grey             | 5 | 44 | 3 | Cardiomyopathy (268), Creatine_phosphokinase (385), Muscular_dystrophy (1040), Myopathy (1059), Rippling_muscle_disease (1333) |
| 860 | RUNX2    | Skeletal         | 2 | 0  | 1 | Cleidocranial_dysplasia (337), Dental_anomalies,_isolated (414)                                                                |
| 861 | RUNX1    | Grey             | 3 | 46 | 3 | Leukemia (886), Platelet_defect/deficiency (1237), Rheumatoid_arthritis (1324)                                                 |
| 865 | CBFB     | Cancer           | 1 | 3  | 1 | Myelogenous_leukemia (1047)                                                                                                    |

|      |        |                  |   |    |                                                                                                                                                                                                            |
|------|--------|------------------|---|----|------------------------------------------------------------------------------------------------------------------------------------------------------------------------------------------------------------|
| 875  | CBS    | Grey             | 2 | 9  | 2 Homocystinuria (698), Thrombophilia (1497)                                                                                                                                                               |
| 889  | KRIT1  | Grey             | 3 | 2  | 2 Cavernous_malformations_of_CNS_and_retina (279), Cerebral_cavernous_malformations (4291), Hyperkeratotic_cutaneous_capillary-venous_malformations_associated_with_cerebral_capillary_malformations (734) |
| 915  | CD3D   | Immunological    | 1 | 7  | 1 Severe_combined_immunodeficiency (1383)                                                                                                                                                                  |
| 916  | CD3E   | Immunological    | 1 | 5  | 1 Immunodeficiency (802)                                                                                                                                                                                   |
| 917  | CD3G   | Immunological    | 1 | 5  | 1 Immunodeficiency (802)                                                                                                                                                                                   |
| 925  | CD8A   | Immunological    | 1 | 0  | 1 CD8_deficiency_familial (284)                                                                                                                                                                            |
| 948  | CD36   | Grey             | 2 | 7  | 2 Malaria (940), Platelet_defect/deficiency (1237)                                                                                                                                                         |
| 958  | CD40   | Immunological    | 1 | 5  | 1 Immunodeficiency (802)                                                                                                                                                                                   |
| 959  | CD40LG | Immunological    | 1 | 5  | 1 Immunodeficiency (802)                                                                                                                                                                                   |
| 960  | CD44   | Hematological    | 1 | 22 | 1 Blood_group (212)                                                                                                                                                                                        |
| 966  | CD59   | Immunological    | 1 | 0  | 1 CD59_deficiency (283)                                                                                                                                                                                    |
| 977  | CD151  | Renal            | 1 | 0  | 1 Nephropathy (1085)                                                                                                                                                                                       |
| 999  | CDH1   | Grey             | 5 | 33 | 2 Breast_cancer (228), Endometrial_carcinoma (479), Gastric_cancer (572), Listeria_monocytogenes (909), Ovarian_cancer (1170)                                                                              |
| 1001 | CDH3   | Dermatological   | 1 | 3  | 1 Hypotrichosis (788)                                                                                                                                                                                      |
| 1019 | CDK4   | Cancer           | 1 | 4  | 1 Melanoma (978)                                                                                                                                                                                           |
| 1028 | CDKN1C | multiple         | 1 | 3  | 1 Beckwith-Wiedemann_syndrome (194)                                                                                                                                                                        |
| 1029 | CDKN2A | Cancer           | 4 | 11 | 1 Li_Fraumeni_syndrome (897), Melanoma (978), Orolaryngeal_cancer (1148), Pancreatic_cancer (1178)                                                                                                         |
| 1041 | CDSN   | Dermatological   | 1 | 3  | 1 Hypotrichosis (788)                                                                                                                                                                                      |
| 1050 | CEBPA  | Cancer           | 1 | 36 | 1 Leukemia (886)                                                                                                                                                                                           |
| 1053 | CEBPE  | Immunological    | 1 | 0  | 1 Specific_granule_deficiency (3419)                                                                                                                                                                       |
| 1071 | CETP   | Grey             | 3 | 1  | 2 CETP_deficiency (299), Hyperalphalipoproteinemia (716), Longevity (911)                                                                                                                                  |
| 1075 | CTSC   | Grey             | 3 | 0  | 2 Haim-Munk_syndrome (634), Papillon-Lefevre_syndrome (1184), Periodontitis (1207)                                                                                                                         |
| 1080 | CFTR   | Grey             | 5 | 2  | 2 Congenital_bilateral_absence_of_vas_deferens (2354), Cystic_fibrosis (399), Hypertrypsinemia (758), Pancreatitis (1179), Sweat_chloride_elevation_without_CF (1466)                                      |
| 1103 | CHAT   | Muscular         | 1 | 6  | 1 Myasthenic_syndrome (1042)                                                                                                                                                                               |
| 1118 | CHIT1  | Metabolic        | 1 | 0  | 1 Chitotriosidase_deficiency (307)                                                                                                                                                                         |
| 1121 | CHM    | Ophthalmological | 1 | 0  | 1 Choroidal_dystrophy (323)                                                                                                                                                                                |
| 1130 | LYST   | multiple         | 1 | 0  | 1 Chediak-Higashi_syndrome (304)                                                                                                                                                                           |
| 1134 | CHRNA1 | Muscular         | 1 | 6  | 1 Myasthenic_syndrome (1042)                                                                                                                                                                               |
| 1137 | CHRNA4 | Grey             | 2 | 18 | 2 Epilepsy (495), Nicotine_addiction (1106)                                                                                                                                                                |
| 1140 | CHRNB1 | Muscular         | 1 | 6  | 1 Myasthenic_syndrome (1042)                                                                                                                                                                               |
| 1141 | CHRNB2 | Neurological     | 1 | 16 | 1 Epilepsy (495)                                                                                                                                                                                           |
| 1144 | CHRND  | Muscular         | 1 | 6  | 1 Myasthenic_syndrome (1042)                                                                                                                                                                               |
| 1145 | CHRNE  | Muscular         | 1 | 6  | 1 Myasthenic_syndrome (1042)                                                                                                                                                                               |
| 1161 | ERCC8  | multiple         | 1 | 1  | 1 Cockayne_syndrome (339)                                                                                                                                                                                  |
| 1180 | CLCN1  | Muscular         | 1 | 1  | 1 Myotonia_congenita (1062)                                                                                                                                                                                |
| 1181 | CLCN2  | Neurological     | 1 | 16 | 1 Epilepsy (495)                                                                                                                                                                                           |
| 1184 | CLCN5  | Grey             | 4 | 3  | 2 Dent_disease (416), Hypophosphatemia (783), Nephrolithiasis (1081), Proteinuria (1274)                                                                                                                   |
| 1186 | CLCN7  | Bone             | 1 | 3  | 1 Osteopetrosis (1161)                                                                                                                                                                                     |
| 1187 | CLCNKA | multiple         | 1 | 4  | 1 Bartter_syndrome (187)                                                                                                                                                                                   |
| 1188 | CLCNKB | multiple         | 1 | 4  | 1 Bartter_syndrome (187)                                                                                                                                                                                   |
| 1200 | TPP1   | Neurological     | 1 | 5  | 1 Ceroid-lipofuscinosis (296)                                                                                                                                                                              |
| 1201 | CLN3   | Neurological     | 1 | 5  | 1 Ceroid-lipofuscinosis (296)                                                                                                                                                                              |
| 1203 | CLN5   | Neurological     | 1 | 5  | 1 Ceroid-lipofuscinosis (296)                                                                                                                                                                              |
| 1231 | CCR2   | Immunological    | 1 | 3  | 1 HIV (684)                                                                                                                                                                                                |
| 1234 | CCR5   | Immunological    | 1 | 3  | 1 HIV (684)                                                                                                                                                                                                |
| 1244 | ABCC2  | Metabolic        | 1 | 0  | 1 Dubin-Johnson_syndrome (450)                                                                                                                                                                             |

|      |         |                            |   |    |   |                                                                                                                                                                              |
|------|---------|----------------------------|---|----|---|------------------------------------------------------------------------------------------------------------------------------------------------------------------------------|
| 1258 | CNGB1   | Ophthalmological           | 1 | 29 | 1 | Retinitis_pigmentosa (1316)                                                                                                                                                  |
| 1259 | CNGA1   | Ophthalmological           | 1 | 29 | 1 | Retinitis_pigmentosa (1316)                                                                                                                                                  |
| 1261 | CNGA3   | Ophthalmological           | 1 | 2  | 1 | Achromatopsia (29)                                                                                                                                                           |
| 1277 | COL1A1  | Grey                       | 5 | 12 | 2 | Caffey_disease (253), Dissection_of_cervical_arteries (439), Ehlers-Danlos_syndrome (470), Osteogenesis_imperfecta (1156), Osteoporosis (1163)                               |
| 1278 | COL1A2  | Grey                       | 4 | 13 | 2 | Ehlers-Danlos_syndrome (470), Marfan_syndrome (950), Osteogenesis_imperfecta (1156), Osteoporosis (1163)                                                                     |
| 1280 | COL2A1  | Grey                       | 6 | 5  | 5 | Achondrogenesis-hypochondrogenesis_type_II (26), Kniest_dysplasia (854), Osteoarthritis (1154), SMED_Strudwick_type (1408), Stickler_syndrome (1447), Wagner_syndrome (1575) |
| 1281 | COL3A1  | Grey                       | 2 | 8  | 1 | Aneurysm,_familial_arterial (2112), Ehlers-Danlos_syndrome (470)                                                                                                             |
| 1282 | COL4A1  | Neurological               | 1 | 0  | 1 | Porencephaly (1247)                                                                                                                                                          |
| 1285 | COL4A3  | Renal                      | 1 | 2  | 1 | Alport_syndrome (94)                                                                                                                                                         |
| 1286 | COL4A4  | Renal                      | 2 | 2  | 1 | Alport_syndrome (94), Hematuria,_familial_benign (653)                                                                                                                       |
| 1287 | COL4A5  | Renal                      | 1 | 2  | 1 | Alport_syndrome (94)                                                                                                                                                         |
| 1288 | COL4A6  | Cancer                     | 1 | 1  | 1 | Leiomyomatosis (878)                                                                                                                                                         |
| 1289 | COL5A1  | Connective_tissue_disorder | 1 | 8  | 1 | Ehlers-Danlos_syndrome (470)                                                                                                                                                 |
| 1290 | COL5A2  | Connective_tissue_disorder | 1 | 8  | 1 | Ehlers-Danlos_syndrome (470)                                                                                                                                                 |
| 1291 | COL6A1  | Muscular                   | 2 | 2  | 1 | Bethlem_myopathy (200), Ullrich_congenital_muscular_dystrophy (1542)                                                                                                         |
| 1292 | COL6A2  | Muscular                   | 2 | 2  | 1 | Bethlem_myopathy (200), Ullrich_congenital_muscular_dystrophy (1542)                                                                                                         |
| 1293 | COL6A3  | Muscular                   | 2 | 2  | 1 | Bethlem_myopathy (200), Ullrich_congenital_muscular_dystrophy (1542)                                                                                                         |
| 1294 | COL7A1  | Dermatological             | 4 | 10 | 1 | EBD (465), Epidermolysis_bullosa (493), Toenail_dystrophy,_isolated (1510), Transient_bullous_of_the_newborn (1518)                                                          |
| 1296 | COL8A2  | Ophthalmological           | 2 | 6  | 1 | Corneal_dystrophy (362), Fuchs_endothelial_corneal_dystrophy (558)                                                                                                           |
| 1297 | COL9A1  | Bone                       | 1 | 5  | 1 | Epiphyseal_dysplasia (496)                                                                                                                                                   |
| 1298 | COL9A2  | Grey                       | 2 | 5  | 2 | Epiphyseal_dysplasia (496), Intervertebral_disc_disease (817)                                                                                                                |
| 1299 | COL9A3  | Grey                       | 2 | 5  | 2 | Epiphyseal_dysplasia (496), Intervertebral_disc_disease (817)                                                                                                                |
| 1300 | COL10A1 | Grey                       | 2 | 2  | 2 | Metaphyseal_chondrodysplasia (997), Spondylometaphyseal_dysplasia (1436)                                                                                                     |
| 1301 | COL11A1 | multiple                   | 2 | 2  | 1 | Marshall_syndrome (953), Stickler_syndrome (1447)                                                                                                                            |
| 1302 | COL11A2 | Grey                       | 4 | 42 | 4 | Deafness (406), OSMED_syndrome (1151), Stickler_syndrome (1447), Weissenbacher-Zweymuller_syndrome (1586)                                                                    |
| 1308 | COL17A1 | Dermatological             | 1 | 10 | 1 | Epidermolysis_bullosa (493)                                                                                                                                                  |
| 1311 | COMP    | Grey                       | 2 | 5  | 2 | Epiphyseal_dysplasia (496), Pseudoachondroplasia (1278)                                                                                                                      |
| 1312 | COMT    | Psychiatric                | 1 | 8  | 1 | Schizophrenia (1359)                                                                                                                                                         |
| 1316 | KLF6    | Cancer                     | 2 | 20 | 1 | Gastric_cancer (572), Prostate_cancer (1272)                                                                                                                                 |
| 1326 | MAP3K8  | Cancer                     | 1 | 3  | 1 | Lung_cancer (918)                                                                                                                                                            |
| 1352 | COX10   | Neurological               | 1 | 1  | 1 | Encephalopathy (476)                                                                                                                                                         |
| 1355 | COX15   | Grey                       | 2 | 35 | 2 | Cardiomyopathy (268), Leigh_syndrome (877)                                                                                                                                   |
| 1356 | CP      | Grey                       | 3 | 1  | 3 | Cerebellar_ataxia (289), Hemosiderosis,_systemic,_due_to_aceruloplasminemia (665), Hypoceruloplasminemia (766)                                                               |
| 1369 | CPN1    | Hematological              | 1 | 0  | 1 | Carboxypeptidase_N_deficiency (264)                                                                                                                                          |
| 1371 | CPOX    | Metabolic                  | 2 | 0  | 1 | Coproporphyrinuria (361), Harderoporphyria (639)                                                                                                                             |
| 1373 | CPS1    | Metabolic                  | 1 | 0  | 1 | Carbamoylphosphate_synthetase_I_deficiency (262)                                                                                                                             |
| 1374 | CPT1A   | Metabolic                  | 1 | 1  | 1 | CPT_deficiency,_hepatic (374)                                                                                                                                                |
| 1376 | CPT2    | Grey                       | 2 | 10 | 2 | CPT_deficiency,_hepatic (374), Myopathy (1059)                                                                                                                               |
| 1378 | CR1     | Hematological              | 1 | 22 | 1 | Blood_group (212)                                                                                                                                                            |
| 1387 | CREBBP  | multiple                   | 1 | 1  | 1 | Rubenstein-Taybi_syndrome (1341)                                                                                                                                             |
| 1406 | CRX     | Ophthalmological           | 3 | 33 | 1 | Cone_dystrophy (352), Leber_congenital_amaurosis (873), Retinitis_pigmentosa (1316)                                                                                          |
| 1409 | CRYAA   | Ophthalmological           | 1 | 14 | 1 | Cataract (277)                                                                                                                                                               |
| 1410 | CRYAB   | Grey                       | 2 | 23 | 2 | Cataract (277), Myopathy (1059)                                                                                                                                              |

|      |         |                  |   |    |   |                                                                                                                                                                                    |
|------|---------|------------------|---|----|---|------------------------------------------------------------------------------------------------------------------------------------------------------------------------------------|
| 1411 | CRYBA1  | Ophthalmological | 1 | 14 | 1 | Cataract (277)                                                                                                                                                                     |
| 1414 | CRYBB1  | Ophthalmological | 1 | 14 | 1 | Cataract (277)                                                                                                                                                                     |
| 1415 | CRYBB2  | Ophthalmological | 1 | 14 | 1 | Cataract (277)                                                                                                                                                                     |
| 1420 | CRYGC   | Ophthalmological | 1 | 14 | 1 | Cataract (277)                                                                                                                                                                     |
| 1421 | CRYGD   | Ophthalmological | 1 | 14 | 1 | Cataract (277)                                                                                                                                                                     |
| 1428 | CRYM    | Ear,Nose,Throat  | 1 | 40 | 1 | Deafness (406)                                                                                                                                                                     |
| 1436 | CSF1R   | Cancer           | 1 | 3  | 1 | Myelogenous_leukemia (1047)                                                                                                                                                        |
| 1439 | CSF2RB  | Respiratory      | 1 | 3  | 1 | Pulmonary_fibrosis (1291)                                                                                                                                                          |
| 1471 | CST3    | Neurological     | 1 | 1  | 1 | Cerebral_amyloid_angiopathy (291)                                                                                                                                                  |
| 1476 | CSTB    | Neurological     | 1 | 16 | 1 | Epilepsy (495)                                                                                                                                                                     |
| 1482 | NKX2-5  | Cardiovascular   | 3 | 8  | 1 | Atrial_fibrillation (166), Atrioventricular_block (168), Tetralogy_of_Fallot (1483)                                                                                                |
| 1491 | CTH     | Metabolic        | 2 | 0  | 1 | Cystathioninuria (398), Homocysteine_plasma_level (697)                                                                                                                            |
| 1493 | CTLA4   | Endocrine        | 2 | 7  | 1 | Graves_disease (624), Hypothyroidism (787)                                                                                                                                         |
| 1497 | CTNS    | Renal            | 1 | 0  | 1 | Cystinosis (400)                                                                                                                                                                   |
| 1499 | CTNNB1  | Cancer           | 4 | 42 | 1 | Colon_cancer (346), Hepatic_adenoma (668), Ovarian_cancer (1170), Pilomatricoma (1230)                                                                                             |
| 1513 | CTSK    | Skeletal         | 1 | 0  | 1 | Pycnodysostosis (1293)                                                                                                                                                             |
| 1524 | CX3CR1  | Immunological    | 1 | 0  | 1 | Rapid_progression_to_AIDS_from_HIV1_infection (1304)                                                                                                                               |
| 1528 | CYB5    | Hematological    | 1 | 3  | 1 | Methemoglobinemia (999)                                                                                                                                                            |
| 1535 | CYBA    | Immunological    | 1 | 3  | 1 | Chronic_granulomatous_disease (327)                                                                                                                                                |
| 1536 | CYBB    | Immunological    | 1 | 3  | 1 | Chronic_granulomatous_disease (327)                                                                                                                                                |
| 1540 | CYLD    | Dermatological   | 1 | 0  | 1 | Cylindromatosis,_familial (397)                                                                                                                                                    |
| 1545 | CYP1B1  | Grey             | 2 | 4  | 2 | Glaucoma (589), Peters_anomaly (1213)                                                                                                                                              |
| 1548 | CYP2A6  | Grey             | 2 | 2  | 2 | Coumarin_resistance (370), Nicotine_addiction (1106)                                                                                                                               |
| 1557 | CYP2C19 | Metabolic        | 3 | 0  | 1 | Mephenytoin_poor_metabolizer (991), Opremazole_poor_metabolizer (1143), Proguanil_poor_metabolizer (1266)                                                                          |
| 1559 | CYP2C9  | Grey             | 2 | 2  | 1 | Tolbutamide_poor_metabolizer (1511), Warfarin_resistance/sensitivity (1580)                                                                                                        |
| 1565 | CYP2D6  | Metabolic        | 2 | 0  | 1 | Codeine_sensitivity (340), Debrisoquine_sensitivity (407)                                                                                                                          |
| 1577 | CYP3A5  | Cardiovascular   | 1 | 11 | 1 | Hypertension (752)                                                                                                                                                                 |
| 1583 | CYP11A1 | Endocrine        | 1 | 1  | 1 | Lipoid_adrenal_hyperplasia (903)                                                                                                                                                   |
| 1584 | CYP11B1 | Endocrine        | 2 | 3  | 1 | Adrenal_hyperplasia,_congenital (53), Aldosteronism (78)                                                                                                                           |
| 1585 | CYP11B2 | Grey             | 3 | 0  | 3 | Aldosterone_to_renin_ratio_raised (77), Hypoaldosteronism (761), Low_renin_hypertension (915)                                                                                      |
| 1586 | CYP17A1 | Endocrine        | 1 | 0  | 1 | 17,20-lyase_deficiency (1)                                                                                                                                                         |
| 1588 | CYP19A1 | Grey             | 2 | 0  | 2 | Aromatase_deficiency (142), Virilization (1563)                                                                                                                                    |
| 1589 | CYP21A2 | Endocrine        | 2 | 3  | 1 | Adrenal_hyperplasia,_congenital (53), Hyperandrogenism (718)                                                                                                                       |
| 1593 | CYP27A1 | Metabolic        | 1 | 0  | 1 | Cerebrotendinous_xanthomatosis (293)                                                                                                                                               |
| 1594 | CYP27B1 | Bone             | 1 | 0  | 1 | Pseudovitamin_D_deficiency_rickets_1 (1284)                                                                                                                                        |
| 1603 | DAD1    | Unclassified     | 1 | 0  | 0 | Temperature-sensitive_apoptosis,_cellular (1480)                                                                                                                                   |
| 1604 | DAF     | Hematological    | 1 | 22 | 1 | Blood_group (212)                                                                                                                                                                  |
| 1618 | DAZL    | Renal            | 1 | 0  | 1 | Spermatogenic_failure (1422)                                                                                                                                                       |
| 1621 | DBH     | Grey             | 2 | 10 | 2 | Dopamine_beta-hydroxylase_deficiency (441), Parkinson_disease (1192)                                                                                                               |
| 1629 | DBT     | Metabolic        | 1 | 3  | 1 | Maple_syrup_urine_disease (948)                                                                                                                                                    |
| 1630 | DCC     | Cancer           | 1 | 33 | 1 | Colon_cancer (346)                                                                                                                                                                 |
| 1636 | ACE     | Grey             | 6 | 48 | 5 | Alzheimer_disease (98), Angiotensin_I-converting_enzyme (117), Diabetes_mellitus (427), Myocardial_infarction (1054), Renal_tubular_dysgenesis (9308), SARS,_progression_of (1352) |
| 1639 | DCTN1   | Neurological     | 2 | 5  | 1 | Amyotrophic_lateral_sclerosis (104), Lower_motor_neuron_disease,_progressive,_without_sensory_symptoms (913)                                                                       |
| 1641 | DCX     | Neurological     | 2 | 3  | 1 | Lissencephaly (908), Subcortical_laminar_heterotopia (1456)                                                                                                                        |
| 1643 | DDB2    | Dermatological   | 1 | 7  | 1 | Xeroderma_pigmentosum (1608)                                                                                                                                                       |
| 1644 | DDC     | Metabolic        | 1 | 0  | 1 | Aromatic_L-amino_acid_decarboxylase_deficiency (143)                                                                                                                               |
| 1646 | AKR1C2  | Nutritional      | 1 | 20 | 1 | Obesity (1126)                                                                                                                                                                     |
| 1649 | DDIT3   | Cancer           | 1 | 0  | 1 | Myxoid_liposarcoma (1065)                                                                                                                                                          |

|      |         |                  |   |    |   |                                                                                                                                                                                                                                  |
|------|---------|------------------|---|----|---|----------------------------------------------------------------------------------------------------------------------------------------------------------------------------------------------------------------------------------|
| 1674 | DES     | Grey             | 2 | 31 | 2 | Cardiomyopathy (268), Myopathy (1059)                                                                                                                                                                                            |
| 1678 | TIMM8A  | Grey             | 3 | 40 | 2 | Deafness (406), Jensen_syndrome (829), Mohr-Tranebjaerg_syndrome (1022)                                                                                                                                                          |
| 1687 | DFNA5   | Ear,Nose,Throat  | 1 | 40 | 1 | Deafness (406)                                                                                                                                                                                                                   |
| 1690 | COCH    | Grey             | 2 | 40 | 2 | Deafness (406), Meniere_disease (985)                                                                                                                                                                                            |
| 1716 | DGUOK   | multiple         | 1 | 1  | 1 | Mitochondrial_DNA_depletion_syndrome (5016)                                                                                                                                                                                      |
| 1717 | DHCR7   | multiple         | 1 | 0  | 1 | Smith-Lemli-Opitz_syndrome (1410)                                                                                                                                                                                                |
| 1718 | DHCR24  | Metabolic        | 1 | 0  | 1 | Desmosterolosis (426)                                                                                                                                                                                                            |
| 1727 | CYB5R3  | Hematological    | 1 | 3  | 1 | Methemoglobinemia (999)                                                                                                                                                                                                          |
| 1728 | NQO1    | Grey             | 2 | 36 | 1 | Benzene_toxicity (195), Leukemia (886)                                                                                                                                                                                           |
| 1729 | DIAPH1  | Ear,Nose,Throat  | 1 | 40 | 1 | Deafness (406)                                                                                                                                                                                                                   |
| 1730 | DIAPH2  | Renal            | 1 | 1  | 1 | Premature_ovarian_failure (1260)                                                                                                                                                                                                 |
| 1736 | DKC1    | Grey             | 2 | 1  | 2 | Dyskeratosis (458), Hoyeraal-Hreidarsson_syndrome (702)                                                                                                                                                                          |
| 1741 | DLG3    | Neurological     | 1 | 23 | 1 | Mental_retardation (990)                                                                                                                                                                                                         |
| 1747 | DLX3    | Grey             | 2 | 3  | 2 | Amelogenesis_imperfecta (99), Trichodontoosseous_syndrome (1522)                                                                                                                                                                 |
| 1755 | DMBT1   | Cancer           | 1 | 4  | 1 | Glioblastoma (590)                                                                                                                                                                                                               |
| 1756 | DMD     | Grey             | 3 | 25 | 2 | Becker_muscular_dystrophy (193), Cardiomyopathy (268), Duchenne_muscular_dystrophy (451)                                                                                                                                         |
| 1760 | DMPK    | Muscular         | 1 | 1  | 1 | Myotonic_dystrophy (1063)                                                                                                                                                                                                        |
| 1767 | DNAH5   | Grey             | 2 | 2  | 2 | Ciliary_dyskinesia (331), Kartagener_syndrome (840)                                                                                                                                                                              |
| 1773 | DNASE1  | Immunological    | 1 | 3  | 1 | Systemic_lupus_erythematosus (1471)                                                                                                                                                                                              |
| 1785 | DNM2    | Neurological     | 1 | 17 | 1 | Charcot-Marie-Tooth_disease (301)                                                                                                                                                                                                |
| 1789 | DNMT3B  | multiple         | 1 | 0  | 1 | Immunodeficiency-centromeric_instability-facial_anomalies_syndrome (801)                                                                                                                                                         |
| 1798 | DPAGT1  | Metabolic        | 1 | 12 | 1 | Congenital_disorder_of_glycosylation (354)                                                                                                                                                                                       |
| 1806 | DPYD    | Metabolic        | 2 | 0  | 1 | Fluorouracil_toxicity_sensitivity_to (544), Thymine-uraciluria (1502)                                                                                                                                                            |
| 1807 | DPYS    | Metabolic        | 1 | 0  | 1 | Dihydropyrimidinuria (433)                                                                                                                                                                                                       |
| 1811 | SLC26A3 | Gastrointestinal | 1 | 0  | 1 | Chloride_diarrhea_congenital_Finnish_type (308)                                                                                                                                                                                  |
| 1813 | DRD2    | Neurological     | 1 | 5  | 1 | Dystonia (462)                                                                                                                                                                                                                   |
| 1815 | DRD4    | Psychiatric      | 1 | 0  | 1 | Autonomic_nervous_system_dysfunction (175)                                                                                                                                                                                       |
| 1816 | DRD5    | Grey             | 3 | 5  | 3 | Attention-deficit_hyperactivity_disorder (171), Blepharospasm (211), Dystonia (462)                                                                                                                                              |
| 1822 | ATN1    | Neurological     | 1 | 0  | 1 | Dentatorubro-pallidoluysian_atrophy (415)                                                                                                                                                                                        |
| 1828 | DSG1    | Dermatological   | 1 | 3  | 1 | Keratosis_palmoplantaria_striata (847)                                                                                                                                                                                           |
| 1832 | DSP     | Grey             | 5 | 15 | 3 | Arrhythmogenic_right_ventricular_dysplasia (144), Dilated_cardiomyopathy_with_woolly_hair_and_keratoderma (434), Epidermolysis_bullosa (493), Keratosis_palmoplantaria_striata (847), Skin_fragility-woolly_hair_syndrome (1401) |
| 1834 | DSPP    | Grey             | 3 | 40 | 2 | Deafness (406), Dentin_dysplasia_type_II (417), Dentinogenesis_imperfecta_Shields_type (418)                                                                                                                                     |
| 1836 | SLC26A2 | Grey             | 4 | 6  | 3 | Achondrogenesis_ib (27), Atelosteogenesis (160), Diastrophic_dysplasia (430), Epiphyseal_dysplasia (496)                                                                                                                         |
| 1837 | DTNA    | Cardiovascular   | 1 | 0  | 1 | Left_ventricular_noncompaction (875)                                                                                                                                                                                             |
| 1861 | TOR1A   | Neurological     | 1 | 5  | 1 | Dystonia (462)                                                                                                                                                                                                                   |
| 1889 | ECE1    | Grey             | 2 | 17 | 2 | Hirschsprung_disease (681), Hypertension (752)                                                                                                                                                                                   |
| 1890 | ECGF1   | multiple         | 1 | 0  | 1 | Myoneurogastrointestinal_encephalomyopathy_syndrome (1058)                                                                                                                                                                       |
| 1893 | ECM1    | Metabolic        | 1 | 0  | 1 | Lipoid_proteinosis (2903)                                                                                                                                                                                                        |
| 1896 | EDA     | Dermatological   | 1 | 7  | 1 | Ectodermal_dysplasia (466)                                                                                                                                                                                                       |
| 1908 | EDN3    | Grey             | 3 | 7  | 3 | Central_hypoventilation_syndrome (287), Hirschsprung_disease (681), Shah-Waardenburg_syndrome (1386)                                                                                                                             |
| 1909 | EDNRA   | Neurological     | 1 | 3  | 1 | Migraine (1013)                                                                                                                                                                                                                  |
| 1910 | EDNRB   | Grey             | 3 | 7  | 2 | ABCD_syndrome (15), Hirschsprung_disease (681), Waardenburg-Shah_syndrome (1573)                                                                                                                                                 |
| 1947 | EFNB1   | Skeletal         | 1 | 0  | 1 | Craniofrontonasal_dysplasia (380)                                                                                                                                                                                                |
| 1956 | EGFR    | Cancer           | 2 | 4  | 1 | Adenocarcinoma (45), Non-small_cell_lung_cancer (1115)                                                                                                                                                                           |
| 1959 | EGR2    | Grey             | 3 | 22 | 2 | Charcot-Marie-Tooth_disease (301), Dejerine-Sottas_disease (410), Neuropathy (1099)                                                                                                                                              |
| 1967 | EIF2B1  | Neurological     | 1 | 4  | 1 | Leukoencephalopathy_with_vanishing_white_matter (891)                                                                                                                                                                            |
| 1991 | ELA2    | Hematological    | 2 | 3  | 1 | Hematopoiesis_cyclic (652), Neutropenia (1101)                                                                                                                                                                                   |
| 2006 | ELN     | Grey             | 3 | 2  | 3 | Cutis_laxa (395), Supravalvar_aortic_stenosis (1463), Williams-Beuren_syndrome (1594)                                                                                                                                            |



|      |        |                |   |    |   |                                                                                                        |
|------|--------|----------------|---|----|---|--------------------------------------------------------------------------------------------------------|
| 2010 | EMD    | Muscular       | 1 | 1  | 1 | Emery-Dreifuss_muscular_dystrophy (474)                                                                |
| 2018 | EMX2   | Neurological   | 1 | 0  | 1 | Schizencephaly (1357)                                                                                  |
| 2022 | ENG    | Cardiovascular | 1 | 1  | 1 | Hereditary_hemorrhagic_telangiectasia (669)                                                            |
| 2027 | ENO3   | Metabolic      | 1 | 0  | 1 | Enolase_deficiency (485)                                                                               |
| 2033 | EP300  | Grey           | 2 | 34 | 2 | Colon_cancer (346), Rubenstein-Taybi_syndrome (1341)                                                   |
| 2035 | EPB41  | Hematological  | 1 | 3  | 1 | Elliptocytosis (472)                                                                                   |
| 2038 | EPB42  | Hematological  | 1 | 4  | 1 | Spherocytosis (1423)                                                                                   |
| 2048 | EPHB2  | Cancer         | 1 | 11 | 1 | Prostate_cancer (1272)                                                                                 |
| 2052 | EPHX1  | Grey           | 2 | 4  | 2 | Hypercholanemia (723), Preeclampsia (1257)                                                             |
| 2053 | EPHX2  | Metabolic      | 1 | 7  | 1 | Hypercholesterolemia (724)                                                                             |
| 2055 | CLN8   | Neurological   | 1 | 5  | 1 | Ceroid-lipofuscinosis (296)                                                                            |
| 2057 | EPOR   | Hematological  | 1 | 1  | 1 | Erythrocytosis (505)                                                                                   |
| 2064 | ERBB2  | Cancer         | 4 | 21 | 1 | Adenocarcinoma (45), Gastric_cancer (572), Glioblastoma (590), Ovarian_cancer (1170)                   |
| 2068 | ERCC2  | Grey           | 3 | 10 | 2 | Cerebrooculofacioskeletal_syndrome (292), Trichothiodystrophy (1525), Xeroderma_pigmentosum (1608)     |
| 2070 | EYA4   | Grey           | 2 | 64 | 2 | Cardiomyopathy (268), Deafness (406)                                                                   |
| 2071 | ERCC3  | Dermatological | 2 | 9  | 1 | Trichothiodystrophy (1525), Xeroderma_pigmentosum (1608)                                               |
| 2072 | ERCC4  | Dermatological | 1 | 7  | 1 | Xeroderma_pigmentosum (1608)                                                                           |
| 2073 | ERCC5  | Grey           | 2 | 8  | 2 | Cerebrooculofacioskeletal_syndrome (292), Xeroderma_pigmentosum (1608)                                 |
| 2074 | ERCC6  | multiple       | 3 | 3  | 1 | Cerebrooculofacioskeletal_syndrome (292), Cockayne_syndrome (339), De_Sanctis-Cacchione_syndrome (424) |
| 2099 | ESR1   | Grey           | 3 | 4  | 3 | Estrogen_resistance (509), HDL_cholesterol_level_QTL (644), Migraine (1013)                            |
| 2108 | ETFA   | Metabolic      | 1 | 3  | 1 | Glutaricaciduria (603)                                                                                 |
| 2109 | ETFB   | Metabolic      | 1 | 3  | 1 | Glutaricaciduria (603)                                                                                 |
| 2110 | ETFDH  | Metabolic      | 1 | 3  | 1 | Glutaricaciduria (603)                                                                                 |
| 2121 | EVC    | Skeletal       | 2 | 1  | 1 | Ellis-van_Creveld_syndrome (473), Weyers_acroental_dysostosis (1590)                                   |
| 2130 | EWSR1  | Cancer         | 2 | 2  | 1 | Chondrosarcoma (316), Ewing_sarcoma (511)                                                              |
| 2131 | EXT1   | Grey           | 2 | 3  | 2 | Chondrosarcoma (316), Exostoses (514)                                                                  |
| 2132 | EXT2   | Bone           | 1 | 1  | 1 | Exostoses (514)                                                                                        |
| 2138 | EYA1   | Grey           | 2 | 3  | 2 | Anterior_segment_anomalies_and_cataract (126), Branchiootic_syndrome (226)                             |
| 2147 | F2     | Hematological  | 3 | 0  | 1 | Dysprothrombinemia (460), Hyperprothrombinemia (751), Hypoprothrombinemia (786)                        |
| 2153 | F5     | Hematological  | 3 | 12 | 1 | Hemorrhagic_diathesis (664), Thrombocytopenia (1494), Thrombophilia (1497)                             |
| 2155 | F7     | Grey           | 2 | 16 | 2 | Factor_x_deficiency (520), Myocardial_infarction (1054)                                                |
| 2157 | F8     | Hematological  | 1 | 1  | 1 | Hemophilia (663)                                                                                       |
| 2158 | F9     | Hematological  | 2 | 3  | 1 | Hemophilia (663), Warfarin_resistance/sensitivity (1580)                                               |
| 2159 | F10    | Hematological  | 1 | 7  | 1 | Factor_x_deficiency (520)                                                                              |
| 2160 | F11    | Hematological  | 1 | 7  | 1 | Factor_x_deficiency (520)                                                                              |
| 2161 | F12    | Hematological  | 1 | 7  | 1 | Factor_x_deficiency (520)                                                                              |
| 2162 | F13A1  | Hematological  | 1 | 7  | 1 | Factor_x_deficiency (520)                                                                              |
| 2165 | F13B   | Hematological  | 1 | 7  | 1 | Factor_x_deficiency (520)                                                                              |
| 2166 | FAAH   | Psychiatric    | 1 | 0  | 1 | Drug_addiction (447)                                                                                   |
| 2175 | FANCA  | multiple       | 1 | 10 | 1 | Fanconi_anemia (523)                                                                                   |
| 2176 | FANCC  | multiple       | 1 | 10 | 1 | Fanconi_anemia (523)                                                                                   |
| 2177 | FANCD2 | multiple       | 1 | 10 | 1 | Fanconi_anemia (523)                                                                                   |
| 2178 | FANCE  | multiple       | 1 | 10 | 1 | Fanconi_anemia (523)                                                                                   |
| 2182 | ACSL4  | Neurological   | 1 | 23 | 1 | Mental_retardation (990)                                                                               |
| 2184 | FAH    | Metabolic      | 1 | 2  | 1 | Tyrosinemia (1540)                                                                                     |
| 2187 | FANCB  | multiple       | 1 | 10 | 1 | Fanconi_anemia (523)                                                                                   |
| 2188 | FANCF  | multiple       | 1 | 10 | 1 | Fanconi_anemia (523)                                                                                   |
| 2189 | FANCG  | multiple       | 1 | 10 | 1 | Fanconi_anemia (523)                                                                                   |
| 2192 | FBLN1  | Skeletal       | 1 | 1  | 1 | Synpolydactyly (1470)                                                                                  |

|      |         |                            |   |    |   |                                                                                                                                                                                                                                                                                      |
|------|---------|----------------------------|---|----|---|--------------------------------------------------------------------------------------------------------------------------------------------------------------------------------------------------------------------------------------------------------------------------------------|
| 2200 | FBN1    | Grey                       | 6 | 3  | 4 | Aortic_aneurysm (130), Ectopia (467), Marfan_syndrome (950), MASS_syndrome (957), Shprintzen-Goldberg_syndrome (1388), Weill-Marchesani_syndrome (1585)                                                                                                                              |
| 2201 | FBN2    | Connective_tissue_disorder | 1 | 0  | 1 | Contractural_arachnodactyly_congenital (358)                                                                                                                                                                                                                                         |
| 2202 | EFEMP1  | Ophthalmological           | 1 | 0  | 1 | Doyne_honeycomb_degeneration_of_retina (446)                                                                                                                                                                                                                                         |
| 2203 | FBP1    | Metabolic                  | 1 | 0  | 1 | Fructose-bisphosphatase_deficiency (555)                                                                                                                                                                                                                                             |
| 2206 | MS4A2   | Respiratory                | 1 | 12 | 1 | Asthma (153)                                                                                                                                                                                                                                                                         |
| 2209 | FCGR1A  | Immunological              | 1 | 0  | 1 | IgG_receptor_I_phagocytic_familial_deficiency_of (799)                                                                                                                                                                                                                               |
| 2212 | FCGR2A  | Connective_tissue_disorder | 1 | 0  | 1 | Lupus_erythematosus (919)                                                                                                                                                                                                                                                            |
| 2213 | FCGR2B  | Cancer                     | 1 | 9  | 1 | Lymphoma (925)                                                                                                                                                                                                                                                                       |
| 2214 | FCGR3A  | Grey                       | 2 | 4  | 2 | Neutropenia (1101), Viral_infection (1562)                                                                                                                                                                                                                                           |
| 2218 | FCMD    | Grey                       | 2 | 18 | 2 | Muscular_dystrophy (1040), Walker-Warburg_syndrome (1578)                                                                                                                                                                                                                            |
| 2235 | FECH    | Metabolic                  | 1 | 0  | 1 | Protoporphyrinemia (1276)                                                                                                                                                                                                                                                            |
| 2243 | FGA     | Grey                       | 3 | 7  | 2 | Afibrinogenemia (61), Amyloidosis (103), Dysfibrinogenemia (457)                                                                                                                                                                                                                     |
| 2244 | FGB     | Hematological              | 3 | 9  | 1 | Afibrinogenemia (61), Dysfibrinogenemia (457), Thrombophilia (1497)                                                                                                                                                                                                                  |
| 2245 | FGD1    | Grey                       | 2 | 23 | 2 | Aarskog-Scott_syndrome (13), Mental_retardation (990)                                                                                                                                                                                                                                |
| 2255 | FGF10   | Gastrointestinal           | 1 | 0  | 1 | Aplasia_of_lacrimal_and_salivary_glands (132)                                                                                                                                                                                                                                        |
| 2259 | FGF14   | Neurological               | 1 | 12 | 1 | Spinocerebellar_ataxia (1428)                                                                                                                                                                                                                                                        |
| 2260 | FGFR1   | Grey                       | 3 | 2  | 2 | Jackson-Weiss_syndrome (827), Kallmann_syndrome (836), Pfeiffer_syndrome (1215)                                                                                                                                                                                                      |
| 2261 | FGFR3   | Grey                       | 8 | 37 | 2 | Achondroplasia (28), Bladder_cancer (207), Cervical_carcinoma (298), Colon_cancer (346), Crouzon_syndrome (391), Hypochondroplasia (767), Muenke_syndrome (1034), Thanatophoric_dysplasia_types_I_and_II (1490)                                                                      |
| 2263 | FGFR2   | Grey                       | 9 | 13 | 5 | Apert_syndrome (131), Beare-Stevenson_cutis_gyrata_syndrome (192), Craniofacial-skeletal-dermatologic_dysplasia (379), Craniosynostosis (383), Crouzon_syndrome (391), Gastric_cancer (572), Jackson-Weiss_syndrome (827), Pfeiffer_syndrome (1215), Saethre-Chotzen_syndrome (1344) |
| 2264 | FGFR4   | Cancer                     | 1 | 1  | 1 | Cancer_susceptibility (259)                                                                                                                                                                                                                                                          |
| 2266 | FGG     | Hematological              | 3 | 9  | 1 | Dysfibrinogenemia (457), Hypofibrinogenemia (770), Thrombophilia (1497)                                                                                                                                                                                                              |
| 2271 | FH      | Grey                       | 3 | 1  | 2 | Fumarate_deficiency (561), Leiomyomatosis (878), Multiple_cutaneous_and_uterine_leiomyomata (3037)                                                                                                                                                                                   |
| 2289 | FKBP5   | Psychiatric                | 1 | 0  | 1 | Major_depressive_disorder (939)                                                                                                                                                                                                                                                      |
| 2296 | FOXC1   | Grey                       | 5 | 4  | 2 | Anterior_segment_anomalies_and_cataract (126), Axenfeld_anomaly (177), Iridogoniodysgenesis (822), Iris_hypoplasia_and_glaucoma (823), Rieger_syndrome (1331)                                                                                                                        |
| 2301 | FOXE3   | Ophthalmological           | 1 | 3  | 1 | Anterior_segment_anomalies_and_cataract (126)                                                                                                                                                                                                                                        |
| 2303 | FOXC2   | Grey                       | 2 | 1  | 2 | Lymphedema (921), Yellow_nail_syndrome (1613)                                                                                                                                                                                                                                        |
| 2304 | FOXE1   | Endocrine                  | 1 | 0  | 1 | Bamforth-Lazarus_syndrome (180)                                                                                                                                                                                                                                                      |
| 2308 | FOXO1A  | Cancer                     | 1 | 3  | 1 | Rhabdomyosarcoma (1323)                                                                                                                                                                                                                                                              |
| 2316 | FLNA    | Grey                       | 4 | 0  | 3 | Frontometaphyseal_dysplasia (554), Heterotopia (676), Melnick-Needles_syndrome (981), Otopalatodigital_syndrome (1168)                                                                                                                                                               |
| 2317 | FLNB    | Grey                       | 3 | 1  | 2 | Atelosteogenesis (160), Larson_syndrome (865), Spondylocarpotarsal_synostosis_syndrome (1432)                                                                                                                                                                                        |
| 2322 | FLT3    | Cancer                     | 1 | 36 | 1 | Leukemia (886)                                                                                                                                                                                                                                                                       |
| 2324 | FLT4    | Grey                       | 2 | 2  | 2 | Hemangioma (651), Lymphedema (921)                                                                                                                                                                                                                                                   |
| 2328 | FMO3    | Metabolic                  | 1 | 0  | 1 | Fish-odor_syndrome (541)                                                                                                                                                                                                                                                             |
| 2332 | FMR1    | Neurological               | 1 | 0  | 1 | Fragile_X_syndrome (550)                                                                                                                                                                                                                                                             |
| 2334 | AFF2    | Neurological               | 1 | 23 | 1 | Mental_retardation (990)                                                                                                                                                                                                                                                             |
| 2395 | FXN     | Neurological               | 1 | 0  | 1 | Friedreich_ataxia (553)                                                                                                                                                                                                                                                              |
| 2487 | FRZB    | Connective_tissue_disorder | 1 | 3  | 1 | Osteoarthritis (1154)                                                                                                                                                                                                                                                                |
| 2488 | FSHB    | Endocrine                  | 1 | 0  | 1 | Follicle-stimulating_hormone_deficiency_isolated (546)                                                                                                                                                                                                                               |
| 2489 | FSHMD1A | Muscular                   | 1 | 0  | 1 | Facioscapulohumeral_muscular_dystrophy (519)                                                                                                                                                                                                                                         |
| 2492 | FSHR    | Grey                       | 4 | 1  | 2 | Ovarian_dysgenesis (3171), Ovarian_hyperstimulation_syndrome (5170), Ovarian_sex_cord_tumors (7170), Twinning_dizygotic (1538)                                                                                                                                                       |

|      |         |                  |   |    |   |                                                                             |
|------|---------|------------------|---|----|---|-----------------------------------------------------------------------------|
| 2495 | FTH1    | Hematological    | 1 | 1  | 1 | Iron_overload/deficiency (824)                                              |
| 2512 | FTL     | Grey             | 2 | 1  | 2 | Basal_ganglia_disease (4188), Hyperferritinemia-cataract_syndrome (727)     |
| 2516 | NR5A1   | Grey             | 2 | 0  | 1 | Adrenocortical_insufficiency (2055), Sex_reversal (1384)                    |
| 2517 | FUCA1   | Metabolic        | 1 | 0  | 1 | Fucosidosis (559)                                                           |
| 2523 | FUT1    | Hematological    | 1 | 1  | 1 | Bombay_phenotype (216)                                                      |
| 2524 | FUT2    | Grey             | 2 | 1  | 2 | Bombay_phenotype (216), Norwalk_virus_infection,_resistance_to (1119)       |
| 2525 | FUT3    | Hematological    | 1 | 22 | 1 | Blood_group (212)                                                           |
| 2528 | FUT6    | Metabolic        | 1 | 0  | 1 | Fucosyltransferase-6_deficiency (560)                                       |
| 2538 | G6PC    | Metabolic        | 1 | 8  | 1 | Glycogen_storage_disease (610)                                              |
| 2539 | G6PD    | Grey             | 3 | 9  | 2 | Favism (528), G6PD_deficiency (563), Hemolytic_anemia (660)                 |
| 2542 | SLC37A4 | Metabolic        | 1 | 8  | 1 | Glycogen_storage_disease (610)                                              |
| 2548 | GAA     | Metabolic        | 1 | 8  | 1 | Glycogen_storage_disease (610)                                              |
| 2554 | GABRA1  | Neurological     | 1 | 16 | 1 | Epilepsy (495)                                                              |
| 2555 | GABRA2  | Unclassified     | 1 | 0  | 0 | Alcoholism (75)                                                             |
| 2562 | GABRB3  | Psychiatric      | 1 | 1  | 1 | Insomnia (812)                                                              |
| 2566 | GABRG2  | Neurological     | 2 | 18 | 1 | Epilepsy (495), Myoclonic_epilepsy (1055)                                   |
| 2581 | GALC    | Neurological     | 1 | 0  | 1 | Krabbe_disease (856)                                                        |
| 2582 | GALE    | Metabolic        | 1 | 0  | 1 | Galactose_epimerase_deficiency (566)                                        |
| 2584 | GALK1   | Metabolic        | 1 | 0  | 1 | Galactokinase_deficiency (565)                                              |
| 2588 | GALNS   | Metabolic        | 1 | 6  | 1 | Mucopolysaccharidosis (1033)                                                |
| 2591 | GALNT3  | Bone             | 1 | 1  | 1 | Calcinosis,_tumoral (254)                                                   |
| 2592 | GALT    | Metabolic        | 1 | 0  | 1 | Galactosemia (567)                                                          |
| 2593 | GAMT    | Metabolic        | 1 | 0  | 1 | GAMT_deficiency (570)                                                       |
| 2617 | GARS    | Grey             | 2 | 23 | 2 | Charcot-Marie-Tooth_disease (301), Spinal_muscular_atrophy (1426)           |
| 2623 | GATA1   | Grey             | 3 | 36 | 2 | Dyserythropoietic_anemia (456), Leukemia (886), Macrothrombocytopenia (936) |
| 2625 | GATA3   | Endocrine        | 1 | 0  | 1 | Hypoparathyroidism (781)                                                    |
| 2626 | GATA4   | Cardiovascular   | 1 | 4  | 1 | Atrial_fibrillation (166)                                                   |
| 2628 | GATM    | Metabolic        | 1 | 0  | 1 | AGAT_deficiency (64)                                                        |
| 2629 | GBA     | Metabolic        | 1 | 1  | 1 | Gaucher_disease (575)                                                       |
| 2632 | GBE1    | Metabolic        | 1 | 8  | 1 | Glycogen_storage_disease (610)                                              |
| 2638 | GC      | Endocrine        | 1 | 1  | 1 | Graves_disease (624)                                                        |
| 2639 | GCDH    | Metabolic        | 1 | 3  | 1 | Glutaricaciduria (603)                                                      |
| 2642 | GCGR    | Endocrine        | 1 | 26 | 1 | Diabetes_mellitus (427)                                                     |
| 2643 | GCH1    | Neurological     | 1 | 5  | 1 | Dystonia (462)                                                              |
| 2645 | GCK     | Grey             | 3 | 27 | 2 | Diabetes_mellitus (427), Hyperinsulinism (731), MODY (1020)                 |
| 2651 | GCNT2   | Hematological    | 2 | 22 | 1 | Adult_i_phenotype (58), Blood_group (212)                                   |
| 2652 | OPN1MW  | Ophthalmological | 2 | 2  | 1 | Blue-cone_monochromacy (214), Colorblindness (348)                          |
| 2653 | GCSH    | Metabolic        | 1 | 3  | 1 | Glycine_encephalopathy (608)                                                |
| 2654 | GCSL    | Grey             | 2 | 14 | 2 | Leigh_syndrome (877), Maple_syrup_urine_disease (948)                       |
| 2660 | GDF8    | Muscular         | 1 | 1  | 1 | Muscle_hypertrophy (1039)                                                   |
| 2664 | GDI1    | Neurological     | 1 | 23 | 1 | Mental_retardation (990)                                                    |
| 2668 | GDNF    | Grey             | 2 | 7  | 2 | Central_hypoventilation_syndrome (287), Hirschsprung_disease (681)          |
| 2670 | GFAP    | multiple         | 1 | 1  | 1 | Alexander_disease (79)                                                      |
| 2672 | GF11    | Hematological    | 1 | 3  | 1 | Neutropenia (1101)                                                          |
| 2677 | GGCX    | Hematological    | 1 | 1  | 1 | Vitamin_K-dependent_coagulation_defect (1565)                               |
| 2683 | B4GALT1 | Metabolic        | 1 | 12 | 1 | Congenital_disorder_of_glycosylation (354)                                  |
| 2688 | GH1     | Endocrine        | 1 | 0  | 1 | Isolated_growth_hormone_deficiency (825)                                    |
| 2690 | GHR     | Skeletal         | 2 | 2  | 1 | Laron_dwarfism (863), Short_stature (1387)                                  |
| 2692 | GHRHR   | Endocrine        | 1 | 1  | 1 | Growth_hormone (628)                                                        |
| 2694 | GIF     | Hematological    | 1 | 0  | 1 | Intrinsic_factor_deficiency (820)                                           |

|      |        |                  |   |    |   |                                                                                                                                                                                                                    |
|------|--------|------------------|---|----|---|--------------------------------------------------------------------------------------------------------------------------------------------------------------------------------------------------------------------|
| 2697 | GJA1   | Grey             | 4 | 2  | 2 | Atrioventricular_block (168), Hypoplastic_left_heart_syndrome (2785), Oculodentodigital_dysplasia (1132), Syndactyly (1468)                                                                                        |
| 2700 | GJA3   | Ophthalmological | 1 | 14 | 1 | Cataract (277)                                                                                                                                                                                                     |
| 2703 | GJA8   | Ophthalmological | 1 | 14 | 1 | Cataract (277)                                                                                                                                                                                                     |
| 2705 | GJB1   | Neurological     | 1 | 17 | 1 | Charcot-Marie-Tooth_disease (301)                                                                                                                                                                                  |
| 2706 | GJB2   | Grey             | 6 | 41 | 3 | Bart-Pumphrey_syndrome (186), Deafness (406), Hystrix-like_ichthyosis_with_deafness (792), Keratitis-ichthyosis-deafness_syndrome (843), Keratoderma,_palmoplantar,_with_deafness (845), Vohwinkel_syndrome (1571) |
| 2707 | GJB3   | Grey             | 2 | 42 | 2 | Deafness (406), Erythrokeratoderma (507)                                                                                                                                                                           |
| 2710 | GK     | Metabolic        | 1 | 0  | 1 | Glycerol_kinase_deficiency (607)                                                                                                                                                                                   |
| 2717 | GLA    | Metabolic        | 1 | 0  | 1 | Fabry_disease (518)                                                                                                                                                                                                |
| 2719 | GPC3   | Grey             | 2 | 3  | 2 | Simpson-Golabi-Behmel_syndrome (1397), Wilms_tumor (1595)                                                                                                                                                          |
| 2720 | GLB1   | Metabolic        | 2 | 8  | 1 | GM-gangliosidosis (614), Mucopolysaccharidosis (1033)                                                                                                                                                              |
| 2729 | GCLC   | Hematological    | 1 | 9  | 1 | Hemolytic_anemia (660)                                                                                                                                                                                             |
| 2730 | GCLM   | Cardiovascular   | 1 | 9  | 1 | Myocardial_infarction (1054)                                                                                                                                                                                       |
| 2731 | GLDC   | Metabolic        | 1 | 3  | 1 | Glycine_encephalopathy (608)                                                                                                                                                                                       |
| 2736 | GLI2   | multiple         | 1 | 0  | 1 | Pituitary_anomalies_with_holoprosencephaly-like_features (3232)                                                                                                                                                    |
| 2737 | GLI3   | Grey             | 4 | 0  | 2 | Acrocallosal_syndrome (32), Greig_cephalopolysyndactyly_syndrome (626), Pallister-Hall_syndrome (1175), Polydactyly (1243)                                                                                         |
| 2739 | GLO1   | Psychiatric      | 1 | 3  | 1 | Autism (173)                                                                                                                                                                                                       |
| 2741 | GLRA1  | Neurological     | 2 | 1  | 1 | Hyperekplexia (725), Startle_disease (1440)                                                                                                                                                                        |
| 2743 | GLRB   | Neurological     | 1 | 1  | 1 | Hyperekplexia (725)                                                                                                                                                                                                |
| 2746 | GLUD1  | Metabolic        | 1 | 0  | 1 | Hyperinsulinism-hyperammonemia_syndrome (732)                                                                                                                                                                      |
| 2760 | GM2A   | Metabolic        | 1 | 2  | 1 | GM-gangliosidosis (614)                                                                                                                                                                                            |
| 2771 | GNAI2  | Grey             | 2 | 4  | 2 | Pituitary_ACTH-secreting_adenoma (1232), Ventricular_tachycardia (1558)                                                                                                                                            |
| 2778 | GNAS   | Grey             | 6 | 3  | 4 | Acromegaly (38), McCune-Albright_syndrome (963), Osseous_heteroplasia (1152), Pituitary_ACTH-secreting_adenoma (1232), Pseudohypoparathyroidism (1282), Somatotrophinoma (1415)                                    |
| 2779 | GNAT1  | Ophthalmological | 1 | 4  | 1 | Night_blindness (1110)                                                                                                                                                                                             |
| 2780 | GNAT2  | Ophthalmological | 1 | 2  | 1 | Achromatopsia (29)                                                                                                                                                                                                 |
| 2784 | GNB3   | Cardiovascular   | 1 | 11 | 1 | Hypertension (752)                                                                                                                                                                                                 |
| 2798 | GNRHR  | Endocrine        | 2 | 3  | 1 | Fertile_eunuch_syndrome (532), Hypogonadotropic_hypogonadism (774)                                                                                                                                                 |
| 2799 | GNS    | Metabolic        | 1 | 6  | 1 | Mucopolysaccharidosis (1033)                                                                                                                                                                                       |
| 2811 | GP1BA  | Hematological    | 1 | 2  | 1 | Bernard-Soulier_syndrome (196)                                                                                                                                                                                     |
| 2812 | GP1BB  | Hematological    | 2 | 2  | 1 | Bernard-Soulier_syndrome (196), Giant_platelet_disorder,_isolated (584)                                                                                                                                            |
| 2815 | GP9    | Hematological    | 1 | 2  | 1 | Bernard-Soulier_syndrome (196)                                                                                                                                                                                     |
| 2820 | GPD2   | Endocrine        | 1 | 26 | 1 | Diabetes_mellitus (427)                                                                                                                                                                                            |
| 2821 | GPI    | Hematological    | 1 | 9  | 1 | Hemolytic_anemia (660)                                                                                                                                                                                             |
| 2908 | NR3C1  | Endocrine        | 1 | 0  | 1 | Cortisol_resistance (367)                                                                                                                                                                                          |
| 2934 | GSN    | Neurological     | 1 | 5  | 1 | Amyloidosis (103)                                                                                                                                                                                                  |
| 2937 | GSS    | Grey             | 2 | 9  | 2 | Glutathione_synthetase_deficiency (604), Hemolytic_anemia (660)                                                                                                                                                    |
| 2956 | MSH6   | Cancer           | 4 | 40 | 1 | Cancer_susceptibility (259), Colon_cancer (346), Endometrial_carcinoma (479), Ovarian_cancer (1170)                                                                                                                |
| 2978 | GUCA1A | Ophthalmological | 1 | 6  | 1 | Cone_dystrophy (352)                                                                                                                                                                                               |
| 2989 | GULOP  | Nutritional      | 1 | 0  | 1 | Scurvy (1365)                                                                                                                                                                                                      |
| 2990 | GUSB   | Metabolic        | 1 | 6  | 1 | Mucopolysaccharidosis (1033)                                                                                                                                                                                       |
| 2993 | GYP A  | Hematological    | 1 | 22 | 1 | Blood_group (212)                                                                                                                                                                                                  |
| 2994 | GYP B  | Hematological    | 1 | 22 | 1 | Blood_group (212)                                                                                                                                                                                                  |
| 2995 | GYP C  | Grey             | 2 | 26 | 2 | Blood_group (212), Malaria (940)                                                                                                                                                                                   |
| 2998 | GYS2   | Metabolic        | 1 | 8  | 1 | Glycogen_storage_disease (610)                                                                                                                                                                                     |
| 3000 | GUCY2D | Ophthalmological | 2 | 9  | 1 | Cone_dystrophy (352), Leber_congenital_amaurosis (873)                                                                                                                                                             |
| 3028 | HADH2  | Metabolic        | 1 | 0  | 1 | 2-methyl-3-hydroxybutyryl-CoA_dehydrogenase_deficiency (3)                                                                                                                                                         |

|      |          |               |   |    |                                                                                                                                       |
|------|----------|---------------|---|----|---------------------------------------------------------------------------------------------------------------------------------------|
| 3030 | HADHA    | Metabolic     | 4 | 1  | 1 Fatty_liver,_acute,_of_pregnancy (527), HELLP_syndrome (649), LCHAD_deficiency (870), Trifunctional_protein_deficiency (1526)       |
| 3032 | HADHB    | Metabolic     | 1 | 1  | 1 Trifunctional_protein_deficiency (1526)                                                                                             |
| 3033 | HADHSC   | Metabolic     | 1 | 0  | 1 3-hydroxyacyl-CoA_dehydrogenase_deficiency (6)                                                                                      |
| 3034 | HAL      | Metabolic     | 1 | 0  | 1 Histidinemia (682)                                                                                                                  |
| 3039 | HBA1     | Hematological | 4 | 6  | 1 Erythremias (504), Heinz_body_anemia (648), Methemoglobinemia (999), Thalassemias (1486)                                            |
| 3040 | HBA2     | Hematological | 5 | 5  | 1 Erythrocytosis (505), Heinz_body_anemia (648), Hemoglobin_H_disease (659), Hypochromic_microcytic_anemia (768), Thalassemias (1486) |
| 3043 | HBB      | Hematological | 6 | 8  | 1 Erythremias (504), Heinz_body_anemia (648), HPFH (703), Methemoglobinemia (999), Sickle_cell_anemia (1393), Thalassemias (1486)     |
| 3045 | HBD      | Hematological | 1 | 4  | 1 Thalassemias (1486)                                                                                                                 |
| 3047 | HBG1     | Hematological | 1 | 2  | 1 HPFH (703)                                                                                                                          |
| 3048 | HBG2     | Hematological | 1 | 2  | 1 HPFH (703)                                                                                                                          |
| 3053 | SERPIND1 | Hematological | 1 | 8  | 1 Thrombophilia (1497)                                                                                                                |
| 3060 | HCRT     | Psychiatric   | 1 | 0  | 1 Narcolepsy (1073)                                                                                                                   |
| 3064 | HD       | Neurological  | 1 | 3  | 1 Huntington_disease (708)                                                                                                            |
| 3073 | HEXA     | Metabolic     | 3 | 2  | 1 GM-gangliosidosis (614), Hex_A_pseudodeficiency (677), Tay-Sachs_disease (1477)                                                     |
| 3074 | HEXB     | Grey          | 2 | 6  | 2 Sandhoff_disease,_infantile,_juvenile,_and_adult_forms (1347), Spinal_muscular_atrophy (1426)                                       |
| 3075 | CFH      | Grey          | 4 | 11 | 3 Factor_x_deficiency (520), Hemolytic-uremic_syndrome (661), Macular_degeneration (937), Nephropathy-hypertension (1084)             |
| 3077 | HFE      | Metabolic     | 2 | 9  | 1 Hemochromatosis (657), Porphyria (1249)                                                                                             |
| 3081 | HGD      | Metabolic     | 1 | 0  | 1 Alkaptonuria (80)                                                                                                                   |
| 3098 | HK1      | Hematological | 1 | 9  | 1 Hemolytic_anemia (660)                                                                                                              |
| 3106 | HLA-B    | Grey          | 3 | 0  | 3 Abacavir_hypersensitivity (14), Ankylosing_spodylitis (121), Stevens-Johnson_syndrome,_carbamazepine-induced (1446)                 |
| 3110 | HLXB9    | Skeletal      | 1 | 0  | 1 Currarino_syndrome (394)                                                                                                            |
| 3115 | HLA-DPB1 | Unclassified  | 1 | 0  | 0 Beryllium_disease,_chronic (197)                                                                                                    |
| 3119 | HLA-DQB1 | Neurological  | 1 | 1  | 1 Creutzfeldt-Jakob_disease (388)                                                                                                     |
| 3123 | HLA-DRB1 | Immunological | 1 | 2  | 1 Sarcoidosis (1349)                                                                                                                  |
| 3141 | HLCS     | Metabolic     | 1 | 0  | 1 Holocarboxylase_synthetase_deficiency (688)                                                                                         |
| 3145 | HMBS     | Metabolic     | 1 | 5  | 1 Porphyria (1249)                                                                                                                    |
| 3155 | HMGCL    | Metabolic     | 1 | 1  | 1 HMG-CoA_deficiency (686)                                                                                                            |
| 3156 | HMGCR    | Metabolic     | 1 | 0  | 1 Statins (1442)                                                                                                                      |
| 3158 | HMGCS2   | Metabolic     | 1 | 1  | 1 HMG-CoA_deficiency (686)                                                                                                            |
| 3162 | HMOX1    | Metabolic     | 1 | 0  | 1 Heme_oxygenase-1_deficiency (654)                                                                                                   |
| 3172 | HNF4A    | Endocrine     | 2 | 27 | 1 Diabetes_mellitus (427), MODY (1020)                                                                                                |
| 3176 | HNMT     | Respiratory   | 1 | 12 | 1 Asthma (153)                                                                                                                        |
| 3198 | HOXA1    | Neurological  | 2 | 0  | 1 Athabaskan_brainstem_dysgenesis_syndrome (162), Bosley-Salih-Alorainy_syndrome (220)                                                |
| 3207 | HOXA11   | multiple      | 1 | 0  | 1 Radioulnar_synostosis_with_amegakaryocytic_thrombocytopenia (1301)                                                                  |
| 3209 | HOXA13   | multiple      | 2 | 0  | 1 Guttmacher_syndrome (630), Hand-foot-uterus_syndrome (638)                                                                          |
| 3233 | HOXD4    | Cancer        | 1 | 36 | 1 Leukemia (886)                                                                                                                      |
| 3236 | HOXD10   | Grey          | 2 | 17 | 2 Charcot-Marie-Tooth_disease (301), Vertical_talus (1559)                                                                            |
| 3239 | HOXD13   | Skeletal      | 2 | 5  | 1 Brachydactyly (224), Synpolydactyly (1470)                                                                                          |
| 3240 | HP       | Hematological | 2 | 0  | 1 Anhaptoglobinemia (118), Hypohaptoglobinemia (775)                                                                                  |
| 3242 | HPD      | Metabolic     | 1 | 2  | 1 Tyrosinemia (1540)                                                                                                                  |
| 3251 | HPRT1    | Metabolic     | 2 | 0  | 1 HPRT-related_gout (704), Lesch-Nyhan_syndrome, (884)                                                                                |
| 3257 | HPS1     | multiple      | 1 | 6  | 1 Hermansky-Pudlak_syndrome (670)                                                                                                     |
| 3265 | HRAS     | Grey          | 3 | 13 | 2 Bladder_cancer (207), Costello_syndrome (369), Thyroid_carcinoma (1503)                                                             |
| 3273 | HRG      | Hematological | 1 | 8  | 1 Thrombophilia (1497)                                                                                                                |
| 3284 | HSD3B2   | Metabolic     | 1 | 0  | 1 3-beta-hydroxysteroid_dehydrogenase,_type_II,_deficiency (5)                                                                        |

|      |         |                  |   |    |   |                                                                                                                                                 |
|------|---------|------------------|---|----|---|-------------------------------------------------------------------------------------------------------------------------------------------------|
| 3290 | HSD11B1 | Metabolic        | 1 | 1  | 1 | Cortisone_reductase_deficiency (368)                                                                                                            |
| 3291 | HSD11B2 | Grey             | 2 | 11 | 2 | Apparent_mineralocorticoid_excess_hypertension_due_to (137), Hypertension (752)                                                                 |
| 3293 | HSD17B3 | Developmental    | 1 | 1  | 1 | Pseudohermaphroditism_male (1279)                                                                                                               |
| 3295 | HSD17B4 | Metabolic        | 1 | 0  | 1 | D-bifunctional_protein_deficiency (405)                                                                                                         |
| 3299 | HSF4    | Ophthalmological | 1 | 14 | 1 | Cataract (277)                                                                                                                                  |
| 3315 | HSPB1   | Neurological     | 2 | 21 | 1 | Charcot-Marie-Tooth_disease (301), Neuropathy (1099)                                                                                            |
| 3329 | HSPD1   | Neurological     | 1 | 8  | 1 | Spastic_ataxia/paraplegia (1418)                                                                                                                |
| 3339 | HSPG2   | Grey             | 2 | 0  | 2 | Dyssegmental_dysplasia_Silverman-Handmaker_type (461), Schwartz-Jampel_syndrome_type_1 (1361)                                                   |
| 3356 | HTR2A   | Grey             | 5 | 10 | 2 | Alcohol_dependence (74), Anorexia_nervosa (124), Obsessive-compulsive_disorder (1128), Schizophrenia (1359), Seasonal_affective_disorder (1367) |
| 3373 | HYAL1   | Metabolic        | 1 | 6  | 1 | Mucopolysaccharidosis (1033)                                                                                                                    |
| 3383 | ICAM1   | Immunological    | 1 | 4  | 1 | Malaria (940)                                                                                                                                   |
| 3386 | ICAM4   | Hematological    | 1 | 22 | 1 | Blood_group (212)                                                                                                                               |
| 3423 | IDS     | Metabolic        | 1 | 6  | 1 | Mucopolysaccharidosis (1033)                                                                                                                    |
| 3425 | IDUA    | Metabolic        | 1 | 6  | 1 | Mucopolysaccharidosis (1033)                                                                                                                    |
| 3426 | IF      | Immunological    | 1 | 12 | 1 | Complementary_component_deficiency (240)                                                                                                        |
| 3458 | IFNG    | Grey             | 4 | 7  | 4 | AIDS (70), Aplastic_anemia (133), Tuberosus_sclerosis (1534), Tuberculosis (1533)                                                               |
| 3459 | IFNGR1  | Grey             | 4 | 5  | 2 | BCG_infection (191), H_pylori_infection (705), Mycobacterial_infection (1043), Tuberculosis (1533)                                              |
| 3460 | IFNGR2  | Immunological    | 1 | 4  | 1 | Mycobacterial_infection (1043)                                                                                                                  |
| 3476 | IGBP1   | Neurological     | 1 | 0  | 1 | Corpus_callosum_agenesis_of_with_mental_retardation_ocular_coloboma_and_micrognathia (366)                                                      |
| 3479 | IGF1    | Developmental    | 1 | 0  | 1 | Growth_retardation (2628)                                                                                                                       |
| 3480 | IGF1R   | Developmental    | 1 | 1  | 1 | Intrauterine_and_postnatal_growth_retardation (819)                                                                                             |
| 3481 | IGF2    | Developmental    | 1 | 1  | 1 | Intrauterine_and_postnatal_growth_retardation (819)                                                                                             |
| 3482 | IGF2R   | Cancer           | 1 | 7  | 1 | Hepatic_adenoma (668)                                                                                                                           |
| 3483 | IGFALS  | Endocrine        | 1 | 0  | 1 | Acid-labile_subunit_deficiency_of (30)                                                                                                          |
| 3501 | IGHG2   | Immunological    | 1 | 0  | 1 | IgG2_deficiency (798)                                                                                                                           |
| 3507 | IGHM    | Hematological    | 1 | 3  | 1 | Agammaglobulinemia (63)                                                                                                                         |
| 3508 | IGHMBP2 | Muscular         | 1 | 6  | 1 | Spinal_muscular_atrophy (1426)                                                                                                                  |
| 3514 | IGKC    | Immunological    | 1 | 0  | 1 | Kappa_light_chain_deficiency (839)                                                                                                              |
| 3543 | IGLL1   | Hematological    | 1 | 3  | 1 | Agammaglobulinemia (63)                                                                                                                         |
| 3549 | IHH     | Skeletal         | 2 | 4  | 1 | Acrocapitofemoral_dysplasia (33), Brachydactyly (224)                                                                                           |
| 3553 | IL1B    | Cancer           | 1 | 9  | 1 | Gastric_cancer (572)                                                                                                                            |
| 3557 | IL1RN   | Cancer           | 1 | 9  | 1 | Gastric_cancer (572)                                                                                                                            |
| 3559 | IL2RA   | Immunological    | 1 | 0  | 1 | Interleukin-2_receptor_alpha_chain_deficiency_of (816)                                                                                          |
| 3561 | IL2RG   | Immunological    | 2 | 8  | 1 | Combined_immunodeficiency (4350), Severe_combined_immunodeficiency (1383)                                                                       |
| 3566 | IL4R    | Immunological    | 1 | 4  | 1 | Atopy (164)                                                                                                                                     |
| 3569 | IL6     | Immunological    | 1 | 0  | 1 | Kaposi_sarcoma (838)                                                                                                                            |
| 3575 | IL7R    | Immunological    | 1 | 7  | 1 | Severe_combined_immunodeficiency (1383)                                                                                                         |
| 3586 | IL10    | Grey             | 3 | 10 | 2 | Graft-versus-host_disease (623), HIV (684), Rheumatoid_arthritis (1324)                                                                         |
| 3593 | IL12B   | Respiratory      | 1 | 12 | 1 | Asthma (153)                                                                                                                                    |
| 3594 | IL12RB1 | Immunological    | 1 | 4  | 1 | Mycobacterial_infection (1043)                                                                                                                  |
| 3596 | IL13    | Grey             | 2 | 12 | 2 | Allergic_rhinitis (83), Asthma (153)                                                                                                            |
| 3614 | IMPDH1  | Ophthalmological | 1 | 29 | 1 | Retinitis_pigmentosa (1316)                                                                                                                     |
| 3621 | ING1    | Cancer           | 1 | 2  | 1 | Squamous_cell_carcinoma (1437)                                                                                                                  |
| 3630 | INS     | Endocrine        | 2 | 5  | 1 | Hyperproinsulinemia (748), MODY (1020)                                                                                                          |
| 3640 | INSL3   | Renal            | 1 | 1  | 1 | Cryptorchidism (392)                                                                                                                            |
| 3643 | INSR    | Grey             | 3 | 26 | 3 | Diabetes_mellitus (427), Leprechaunism (881), Rabson-Mendenhall_syndrome (1298)                                                                 |
| 3651 | IPF1    | Grey             | 3 | 27 | 2 | Diabetes_mellitus (427), MODY (1020), Pancreatic_agenesis (3178)                                                                                |
| 3655 | ITGA6   | Dermatological   | 1 | 10 | 1 | Epidermolysis_bullosa (493)                                                                                                                     |

|      |         |                            |   |    |   |                                                                                                                                                                                                      |
|------|---------|----------------------------|---|----|---|------------------------------------------------------------------------------------------------------------------------------------------------------------------------------------------------------|
| 3659 | IRF1    | Grey                       | 5 | 15 | 3 | Gastric_cancer (572), Macrocytic_anemia (935), Myelodysplastic_syndrome (1045), Myelogenous_leukemia (1047), Nonsmall_cell_lung_cancer (1115)                                                        |
| 3662 | IRF4    | Cancer                     | 1 | 1  | 1 | Multiple_myeloma (9037)                                                                                                                                                                              |
| 3664 | IRF6    | Grey                       | 3 | 0  | 3 | Orofacial_cleft (1147), Popliteal_terygium_syndrome (1246), van_der_Woude_syndrome (3554)                                                                                                            |
| 3667 | IRS1    | Endocrine                  | 1 | 26 | 1 | Diabetes_mellitus (427)                                                                                                                                                                              |
| 3674 | ITGA2B  | Hematological              | 1 | 1  | 1 | Glanzmann_thrombasthenia (588)                                                                                                                                                                       |
| 3679 | ITGA7   | Muscular                   | 1 | 9  | 1 | Myopathy (1059)                                                                                                                                                                                      |
| 3689 | ITGB2   | Immunological              | 1 | 0  | 1 | Leukocyte_adhesion_deficiency (889)                                                                                                                                                                  |
| 3690 | ITGB3   | Hematological              | 1 | 1  | 1 | Glanzmann_thrombasthenia (588)                                                                                                                                                                       |
| 3691 | ITGB4   | Dermatological             | 1 | 10 | 1 | Epidermolysis_bullosa (493)                                                                                                                                                                          |
| 3700 | ITIH4   | Metabolic                  | 1 | 7  | 1 | Hypercholesterolemia (724)                                                                                                                                                                           |
| 3704 | ITPA    | Metabolic                  | 1 | 0  | 1 | Inosine_triphosphatase_deficiency (810)                                                                                                                                                              |
| 3712 | IVD     | Metabolic                  | 1 | 0  | 1 | Isovaleric_acidemia (826)                                                                                                                                                                            |
| 3717 | JAK2    | Hematological              | 3 | 2  | 1 | Myelofibrosis_idiopathic (1046), Polycythemia (1242), Thrombocythemia (1493)                                                                                                                         |
| 3718 | JAK3    | Immunological              | 1 | 0  | 1 | SCID (1362)                                                                                                                                                                                          |
| 3728 | JUP     | multiple                   | 1 | 0  | 1 | Naxos_disease (1077)                                                                                                                                                                                 |
| 3730 | KAL1    | multiple                   | 1 | 1  | 1 | Kallmann_syndrome (836)                                                                                                                                                                              |
| 3736 | KCNA1   | Neurological               | 1 | 1  | 1 | Episodic_ataxia (497)                                                                                                                                                                                |
| 3753 | KCNE1   | Grey                       | 2 | 6  | 2 | Jervell_and_Lange-Nielsen_syndrome (830), Long_QT_syndrome (912)                                                                                                                                     |
| 3757 | KCNH2   | Cardiovascular             | 2 | 6  | 1 | Acquired_long_QT_syndrome (31), Long_QT_syndrome (912)                                                                                                                                               |
| 3758 | KCNJ1   | multiple                   | 1 | 4  | 1 | Barter_syndrome (187)                                                                                                                                                                                |
| 3759 | KCNJ2   | Cardiovascular             | 1 | 6  | 1 | Long_QT_syndrome (912)                                                                                                                                                                               |
| 3767 | KCNJ11  | Grey                       | 2 | 26 | 2 | Diabetes_mellitus (427), Persistent_hyperinsulinemic_hypoglycemia_of_infancy (3212)                                                                                                                  |
| 3778 | KCNMA1  | Neurological               | 1 | 1  | 1 | Generalized_epilepsy (578)                                                                                                                                                                           |
| 3779 | KCNMB1  | Cardiovascular             | 1 | 11 | 1 | Hypertension (752)                                                                                                                                                                                   |
| 3784 | KCNQ1   | Grey                       | 3 | 9  | 2 | Atrial_fibrillation (166), Jervell_and_Lange-Nielsen_syndrome (830), Long_QT_syndrome (912)                                                                                                          |
| 3785 | KCNQ2   | Neurological               | 2 | 16 | 1 | Epilepsy (495), Myokymia_with_neonatal_epilepsy (1057)                                                                                                                                               |
| 3786 | KCNQ3   | Neurological               | 1 | 16 | 1 | Epilepsy (495)                                                                                                                                                                                       |
| 3791 | KDR     | Cancer                     | 1 | 1  | 1 | Hemangioma (651)                                                                                                                                                                                     |
| 3792 | KEL     | Hematological              | 1 | 22 | 1 | Blood_group (212)                                                                                                                                                                                    |
| 3795 | KHK     | Metabolic                  | 1 | 0  | 1 | Fructosuria (557)                                                                                                                                                                                    |
| 3798 | KIF5A   | Neurological               | 1 | 8  | 1 | Spastic_ataxia/paraplegia (1418)                                                                                                                                                                     |
| 3811 | KIR3DL1 | Immunological              | 1 | 2  | 1 | AIDS (70)                                                                                                                                                                                            |
| 3815 | KIT     | Grey                       | 6 | 38 | 3 | Gastrointestinal_stromal_tumor (574), Germ_cell_tumor (580), Leukemia (886), Mast_cell_leukemia (958), Mastocytosis_with_associated_hematologic_disorder (959), Piebaldism (1226)                    |
| 3816 | KLK1    | Renal                      | 1 | 0  | 1 | Kallikrein_decreased_urinary_activity_of (835)                                                                                                                                                       |
| 3818 | KLKB1   | Hematological              | 1 | 0  | 1 | Prekallikrein_deficiency (1259)                                                                                                                                                                      |
| 3827 | KNG1    | Hematological              | 3 | 0  | 1 | Fitzgerald_factor_deficiency (542), High-molecular-weight_kininogen_deficiency (679), Kininogen_deficiency (851)                                                                                     |
| 3845 | KRAS    | Cancer                     | 6 | 65 | 1 | Bladder_cancer (207), Breast_cancer (228), Leukemia (886), Lung_cancer (918), Pancreatic_cancer (1178), Stomach_cancer (1449)                                                                        |
| 3848 | KRT1    | Dermatological             | 5 | 10 | 1 | Cyclic_ichthyosis_with_epidermolytic_hyperkeratosis (396), Epidermolytic_hyperkeratosis (494), Ichthyosis (794), Keratosis_palmoplantaria_striata (847), Unna-Thost_disease,_nonepidermolytic (1545) |
| 3849 | KRT2A   | Dermatological             | 1 | 6  | 1 | Ichthyosis (794)                                                                                                                                                                                     |
| 3850 | KRT3    | Ophthalmological           | 1 | 1  | 1 | Meesmann_corneal_dystrophy (971)                                                                                                                                                                     |
| 3851 | KRT4    | Connective_tissue_disorder | 1 | 1  | 1 | White_sponge_nevus (1592)                                                                                                                                                                            |
| 3852 | KRT5    | Dermatological             | 1 | 10 | 1 | Epidermolysis_bullosa (493)                                                                                                                                                                          |
| 3853 | KRT6A   | Dermatological             | 1 | 3  | 1 | Pachyonychia_congenita (1172)                                                                                                                                                                        |
| 3854 | KRT6B   | Dermatological             | 1 | 3  | 1 | Pachyonychia_congenita (1172)                                                                                                                                                                        |

|      |        |                            |   |    |   |                                                                                                                                                                                                                           |
|------|--------|----------------------------|---|----|---|---------------------------------------------------------------------------------------------------------------------------------------------------------------------------------------------------------------------------|
| 3856 | KRT8   | Gastrointestinal           | 1 | 2  | 1 | Cirrhosis (334)                                                                                                                                                                                                           |
| 3857 | KRT9   | Dermatological             | 1 | 2  | 1 | Epidermolytic_hyperkeratosis (494)                                                                                                                                                                                        |
| 3858 | KRT10  | Dermatological             | 3 | 7  | 1 | Epidermolytic_hyperkeratosis (494), Ichthyosis (794), Nevus_epidermal,_epidermolytic_hyperkeratotic_type (1104)                                                                                                           |
| 3859 | KRT12  | Ophthalmological           | 1 | 1  | 1 | Meesmann_corneal_dystrophy (971)                                                                                                                                                                                          |
| 3860 | KRT13  | Connective_tissue_disorder | 1 | 1  | 1 | White_sponge_nevus (1592)                                                                                                                                                                                                 |
| 3861 | KRT14  | Dermatological             | 1 | 10 | 1 | Epidermolysis_bullosa (493)                                                                                                                                                                                               |
| 3868 | KRT16  | Dermatological             | 2 | 3  | 1 | Pachyonychia_congenita (1172), Palmoplantar_keratoderma (1176)                                                                                                                                                            |
| 3872 | KRT17  | Dermatological             | 2 | 3  | 1 | Pachyonychia_congenita (1172), Steatocystoma_multiplex (1444)                                                                                                                                                             |
| 3875 | KRT18  | Gastrointestinal           | 1 | 2  | 1 | Cirrhosis (334)                                                                                                                                                                                                           |
| 3887 | KRTHB1 | Dermatological             | 1 | 1  | 1 | Monilethrix (1024)                                                                                                                                                                                                        |
| 3892 | KRTHB6 | Dermatological             | 1 | 1  | 1 | Monilethrix (1024)                                                                                                                                                                                                        |
| 3897 | L1CAM  | Grey                       | 3 | 0  | 2 | CRASH_syndrome (384), Hydrocephalus (712), MASA_syndrome (955)                                                                                                                                                            |
| 3908 | LAMA2  | Muscular                   | 1 | 17 | 1 | Muscular_dystrophy (1040)                                                                                                                                                                                                 |
| 3909 | LAMA3  | Grey                       | 2 | 10 | 2 | Epidermolysis_bullosa (493), Laryngoonychocutaneous_syndrome (868)                                                                                                                                                        |
| 3913 | LAMB2  | Ophthalmological           | 1 | 0  | 1 | Microcoria-congenital_nephrosis_syndrome (1009)                                                                                                                                                                           |
| 3914 | LAMB3  | Dermatological             | 1 | 10 | 1 | Epidermolysis_bullosa (493)                                                                                                                                                                                               |
| 3918 | LAMC2  | Dermatological             | 1 | 10 | 1 | Epidermolysis_bullosa (493)                                                                                                                                                                                               |
| 3920 | LAMP2  | Metabolic                  | 1 | 8  | 1 | Glycogen_storage_disease (610)                                                                                                                                                                                            |
| 3930 | LBR    | Grey                       | 2 | 0  | 2 | Greenberg_dysplasia (625), Pelger-Huet_anomaly (1199)                                                                                                                                                                     |
| 3931 | LCAT   | Metabolic                  | 2 | 0  | 1 | Fish-eye_disease (540), Norum_disease (1118)                                                                                                                                                                              |
| 3938 | LCT    | Metabolic                  | 1 | 1  | 1 | Hypolactasia,_adult_type (777)                                                                                                                                                                                            |
| 3939 | LDHA   | Metabolic                  | 1 | 0  | 1 | Exertional_myoglobinuria_due_to_deficiency_of_LDH-A (512)                                                                                                                                                                 |
| 3945 | LDHB   | Metabolic                  | 1 | 0  | 1 | Lactate_dehydrogenase-B_deficiency (858)                                                                                                                                                                                  |
| 3949 | LDLR   | Metabolic                  | 1 | 7  | 1 | Hypercholesterolemia (724)                                                                                                                                                                                                |
| 3952 | LEP    | Nutritional                | 1 | 20 | 1 | Obesity (1126)                                                                                                                                                                                                            |
| 3953 | LEPR   | Nutritional                | 1 | 20 | 1 | Obesity (1126)                                                                                                                                                                                                            |
| 3957 | LGALS2 | Cardiovascular             | 1 | 9  | 1 | Myocardial_infarction (1054)                                                                                                                                                                                              |
| 3972 | LHB    | Endocrine                  | 1 | 0  | 1 | Hypogonadism,_hypergonadotropic (773)                                                                                                                                                                                     |
| 3973 | LHCGR  | Grey                       | 5 | 4  | 4 | Hypogonadotropic_hypogonadism (774), Leydig_cell_adenoma (894), Micropenis (1011), Precocious_puberty,_male (1256), Pseudohermaphroditism,_male (1279)                                                                    |
| 3977 | LIFR   | multiple                   | 1 | 0  | 1 | Stuve-Wiedemann_syndrome/Schwartz-Jampel_type_2_syndrome (1455)                                                                                                                                                           |
| 3978 | LIG1   | multiple                   | 1 | 0  | 1 | DNA_ligase_I_deficiency (2440)                                                                                                                                                                                            |
| 3981 | LIG4   | Grey                       | 2 | 1  | 2 | LIG4_syndrome (899), Multiple_myeloma (9037)                                                                                                                                                                              |
| 3982 | LIM2   | Ophthalmological           | 1 | 14 | 1 | Cataract (277)                                                                                                                                                                                                            |
| 3988 | LIPA   | Metabolic                  | 2 | 0  | 1 | Cholesteryl_ester_storage_disease (313), Wolman_disease (1604)                                                                                                                                                            |
| 3990 | LIPC   | Metabolic                  | 1 | 0  | 1 | Hepatic_lipase_deficiency (4666)                                                                                                                                                                                          |
| 3998 | LMAN1  | Hematological              | 1 | 0  | 1 | Combined_factor_V_and_VIII_deficiency (350)                                                                                                                                                                               |
| 4000 | LMNA   | Grey                       | 3 | 29 | 3 | Cardiomyopathy (268), Emery-Dreifuss_muscular_dystrophy (474), Lipodystrophy (902)                                                                                                                                        |
| 4010 | LMX1B  | multiple                   | 1 | 0  | 1 | Nail-patella_syndrome (1070)                                                                                                                                                                                              |
| 4014 | LOR    | Grey                       | 2 | 3  | 2 | Erythrokeratoderma (507), Vohwinkel_syndrome (1571)                                                                                                                                                                       |
| 4018 | LPA    | Metabolic                  | 1 | 0  | 1 | LPA_deficiency,_congenital (916)                                                                                                                                                                                          |
| 4023 | LPL    | Metabolic                  | 3 | 0  | 1 | Chylomicronemia_syndrome,_familial (329), Combined_hyperlipemia (2350), Lipoprotein_lipase_deficiency (906)                                                                                                               |
| 4026 | LPP    | Cancer                     | 2 | 38 | 1 | Leukemia (886), Lipoma (904)                                                                                                                                                                                              |
| 4041 | LRP5   | Grey                       | 7 | 10 | 2 | Bone_mineral_density_variability (217), Exudative_vitreoretinopathy (515), Hyperostosis,_endosteal (741), Osteopetrosis (1161), Osteoporosis (1163), Osteoporosis-pseudoglioma_syndrome (1164), van_Buchem_disease (1554) |
| 4049 | LTA    | Cardiovascular             | 1 | 9  | 1 | Myocardial_infarction (1054)                                                                                                                                                                                              |
| 4059 | LU     | Hematological              | 1 | 22 | 1 | Blood_group (212)                                                                                                                                                                                                         |



|      |         |                            |   |    |   |                                                                                                                                                                                                                                                              |
|------|---------|----------------------------|---|----|---|--------------------------------------------------------------------------------------------------------------------------------------------------------------------------------------------------------------------------------------------------------------|
| 4068 | SH2D1A  | Cancer                     | 1 | 9  | 1 | Lymphoma (925)                                                                                                                                                                                                                                               |
| 4069 | LYZ     | Neurological               | 1 | 5  | 1 | Amyloidosis (103)                                                                                                                                                                                                                                            |
| 4070 | TACSTD2 | Ophthalmological           | 1 | 6  | 1 | Corneal_dystrophy (362)                                                                                                                                                                                                                                      |
| 4089 | SMAD4   | Cancer                     | 3 | 9  | 1 | Juvenile_polyposis/hereditary_hemorrhagic_telangiectasia_syndrome (833), Pancreatic_cancer (1178), Polyposis (1245)                                                                                                                                          |
| 4125 | MAN2B1  | Metabolic                  | 1 | 1  | 1 | Mannosidosis (947)                                                                                                                                                                                                                                           |
| 4126 | MANBA   | Metabolic                  | 1 | 1  | 1 | Mannosidosis (947)                                                                                                                                                                                                                                           |
| 4128 | MAOA    | Unclassified               | 1 | 0  | 0 | Brunner_syndrome (235)                                                                                                                                                                                                                                       |
| 4137 | MAPT    | Neurological               | 4 | 5  | 1 | Dementia (412), Pallidopontonigral_degeneration (1174), Supranuclear_palsy (1462), Tauopathy_and_respiratory_failure (1476)                                                                                                                                  |
| 4143 | MAT1A   | Metabolic                  | 2 | 1  | 1 | Hypermethioninemia (739), Methionine_adenosyltransferase_deficiency,_autosomal_recessive (1001)                                                                                                                                                              |
| 4148 | MATN3   | Grey                       | 3 | 12 | 3 | Epiphyseal_dysplasia (496), Osteoarthritis (1154), Spondyloepiphyseal_dysplasia (1435)                                                                                                                                                                       |
| 4153 | MBL2    | Immunological              | 2 | 0  | 1 | Chronic_infections,_due_to_opsonin_defect (2327), Meningococcal_disease (987)                                                                                                                                                                                |
| 4157 | MC1R    | Grey                       | 4 | 2  | 2 | Analgesia_from_kappa-opioid_receptor_agonist,_female-specific (107), Ocular_albinism (1130), Red_hair/fair_skin (1306), UV-induced_skin_damage (1553)                                                                                                        |
| 4158 | MC2R    | Endocrine                  | 1 | 1  | 1 | Glucocorticoid_deficiency (598)                                                                                                                                                                                                                              |
| 4159 | MC3R    | Nutritional                | 1 | 20 | 1 | Obesity (1126)                                                                                                                                                                                                                                               |
| 4160 | MC4R    | Nutritional                | 1 | 20 | 1 | Obesity (1126)                                                                                                                                                                                                                                               |
| 4163 | MCC     | Cancer                     | 1 | 33 | 1 | Colon_cancer (346)                                                                                                                                                                                                                                           |
| 4166 | CHST6   | Ophthalmological           | 1 | 4  | 1 | Macular_dystrophy (2937)                                                                                                                                                                                                                                     |
| 4175 | MCM6    | Grey                       | 2 | 1  | 2 | Hypolactasia,_adult_type (777), Tall_stature (1472)                                                                                                                                                                                                          |
| 4193 | MDM2    | Cancer                     | 1 | 0  | 1 | Accelerated_tumor_formation (22)                                                                                                                                                                                                                             |
| 4197 | MDS1    | Muscular                   | 1 | 2  | 1 | Myelodysplastic_syndrome (1045)                                                                                                                                                                                                                              |
| 4200 | ME2     | Neurological               | 1 | 16 | 1 | Epilepsy (495)                                                                                                                                                                                                                                               |
| 4204 | MECP2   | Grey                       | 5 | 27 | 3 | Angelman_syndrome (113), Autism (173), Mental_retardation (990), PPM-X_syndrome (1253), Rett_syndrome (1321)                                                                                                                                                 |
| 4205 | MEF2A   | Cardiovascular             | 1 | 5  | 1 | Coronary_artery_disease (365)                                                                                                                                                                                                                                |
| 4210 | MEFV    | Immunological              | 1 | 0  | 1 | Familial_Mediterranean_fever (522)                                                                                                                                                                                                                           |
| 4221 | MEN1    | Grey                       | 8 | 5  | 2 | Adrenal_adenoma (2053), Angiofibroma,_sporadic (115), Carcinoid_tumor_of_lung (2265), Hyperparathyroidism (743), Lipoma (904), Multiple_endocrine_neoplasia (1037), Parathyroid_adenoma (1189), Prolactinoma,_hyperparathyroidism,_carcinoid_syndrome (1267) |
| 4233 | MET     | Cancer                     | 2 | 13 | 1 | Hepatic_adenoma (668), Renal_cell_carcinoma (1308)                                                                                                                                                                                                           |
| 4247 | MGAT2   | Metabolic                  | 1 | 2  | 1 | Carbohydrate-deficient_glycoprotein_syndrome (263)                                                                                                                                                                                                           |
| 4256 | MGP     | multiple                   | 1 | 0  | 1 | Keutel_syndrome (849)                                                                                                                                                                                                                                        |
| 4261 | CIITA   | Grey                       | 3 | 12 | 3 | Bare_lymphocyte_syndrome (184), Multiple_sclerosis (9038), Rheumatoid_arthritis (1324)                                                                                                                                                                       |
| 4281 | MID1    | multiple                   | 1 | 0  | 1 | Opitz_G_syndrome (1142)                                                                                                                                                                                                                                      |
| 4282 | MIF     | Connective_tissue_disorder | 1 | 7  | 1 | Rheumatoid_arthritis (1324)                                                                                                                                                                                                                                  |
| 4284 | MIP     | Ophthalmological           | 1 | 14 | 1 | Cataract (277)                                                                                                                                                                                                                                               |
| 4286 | MITF    | multiple                   | 2 | 3  | 1 | Tietz_syndrome (1508), Waardenburg_syndrome (1574)                                                                                                                                                                                                           |
| 4287 | ATXN3   | Neurological               | 1 | 0  | 1 | Machado-Joseph_disease (933)                                                                                                                                                                                                                                 |
| 4292 | MLH1    | Cancer                     | 4 | 33 | 1 | Cafe-au-lait_spots (252), Colon_cancer (346), Muir-Torre_syndrome (1035), Turcot_syndrome (1536)                                                                                                                                                             |
| 4306 | NR3C2   | Grey                       | 2 | 16 | 2 | Hypertension (752), Pseudohypoaldosteronism (1281)                                                                                                                                                                                                           |
| 4312 | MMP1    | Respiratory                | 1 | 0  | 1 | COPD,_rate_of_decline_of_lung_function_in (360)                                                                                                                                                                                                              |
| 4313 | MMP2    | Bone                       | 1 | 1  | 1 | Osteolysis (1157)                                                                                                                                                                                                                                            |
| 4314 | MMP3    | Cardiovascular             | 1 | 5  | 1 | Coronary_artery_disease (365)                                                                                                                                                                                                                                |
| 4329 | ALDH6A1 | Metabolic                  | 1 | 0  | 1 | Methylmalonate_semialdehyde_dehydrogenase_deficiency (1003)                                                                                                                                                                                                  |
| 4330 | MN1     | Cancer                     | 1 | 3  | 1 | Meningioma (986)                                                                                                                                                                                                                                             |
| 4337 | MOCS1   | Metabolic                  | 1 | 2  | 1 | Molybdenum_cofactor_deficiency (1023)                                                                                                                                                                                                                        |
| 4338 | MOCS2   | Metabolic                  | 1 | 2  | 1 | Molybdenum_cofactor_deficiency (1023)                                                                                                                                                                                                                        |

|      |        |                  |   |    |                                                                                                                                                                                                        |
|------|--------|------------------|---|----|--------------------------------------------------------------------------------------------------------------------------------------------------------------------------------------------------------|
| 4351 | MPI    | Metabolic        | 1 | 2  | 1 Carbohydrate-deficient_glycoprotein_syndrome (263)                                                                                                                                                   |
| 4352 | MPL    | Hematological    | 1 | 3  | 1 Thrombocytopenia (1494)                                                                                                                                                                              |
| 4353 | MPO    | Grey             | 2 | 11 | 2 Alzheimer_disease (98), Myeloperoxidase_deficiency (1051)                                                                                                                                            |
| 4359 | MPZ    | Grey             | 4 | 22 | 2 Charcot-Marie-Tooth_disease (301), Dejerine-Sottas_disease (410), Neuropathy (1099), Roussy-Levy_syndrome (1339)                                                                                     |
| 4361 | MRE11A | Immunological    | 1 | 1  | 1 Ataxia-telangiectasia (157)                                                                                                                                                                          |
| 4436 | MSH2   | Cancer           | 8 | 48 | 1 Cafe-au-lait_spots (252), Colon_cancer (346), Glioblastoma (590), Lymphoma (925), Lynch_cancer_family_syndrome_II (930), Muir-Torre_syndrome (1035), Neurofibromatosis (1097), Ovarian_cancer (1170) |
| 4437 | MSH3   | Cancer           | 1 | 3  | 1 Endometrial_carcinoma (479)                                                                                                                                                                          |
| 4481 | MSR1   | Cancer           | 1 | 11 | 1 Prostate_cancer (1272)                                                                                                                                                                               |
| 4487 | MSX1   | Grey             | 3 | 3  | 2 Cleft_palate (336), Hypodontia (769), Witkop_syndrome (1599)                                                                                                                                         |
| 4488 | MSX2   | Skeletal         | 2 | 2  | 1 Craniosynostosis (383), Parietal_foramina (1190)                                                                                                                                                     |
| 4522 | MTHFD1 | Developmental    | 2 | 2  | 1 Neural_tube_defects_maternal_risk_of (1090), Spina_bifida (1425)                                                                                                                                     |
| 4524 | MTHFR  | Metabolic        | 1 | 1  | 1 Homocystinuria (698)                                                                                                                                                                                 |
| 4534 | MTM1   | Muscular         | 1 | 0  | 1 Myotubular_myopathy (1064)                                                                                                                                                                           |
| 4547 | MTP    | Metabolic        | 1 | 1  | 1 Abetalipoproteinemia (17)                                                                                                                                                                            |
| 4548 | MTR    | Grey             | 3 | 2  | 3 Down_syndrome (445), Methylcobalamin_deficiency_cblG_type (1002), Spina_bifida (1425)                                                                                                                |
| 4552 | MTRR   | Grey             | 2 | 2  | 2 Homocystinuria-megaloblastic_anemia_cbl_E_type (699), Spina_bifida (1425)                                                                                                                            |
| 4591 | TRIM37 | multiple         | 1 | 0  | 1 Mulibrey_nanism (1036)                                                                                                                                                                               |
| 4594 | MUT    | Metabolic        | 1 | 2  | 1 Methylmalonic_aciduria (1004)                                                                                                                                                                        |
| 4595 | MUTYH  | Cancer           | 3 | 42 | 1 Adenomas (47), Colon_cancer (346), Gastric_cancer (572)                                                                                                                                              |
| 4598 | MVK    | Grey             | 2 | 0  | 2 Hyper-IgD_syndrome (728), Mevalonicaciduria (1005)                                                                                                                                                   |
| 4601 | MXI1   | Cancer           | 2 | 11 | 1 Neurofibrosarcoma (1098), Prostate_cancer (1272)                                                                                                                                                     |
| 4607 | MYBPC3 | Cardiovascular   | 1 | 24 | 1 Cardiomyopathy (268)                                                                                                                                                                                 |
| 4609 | MYC    | Cancer           | 1 | 0  | 1 Burkitt_lymphoma (237)                                                                                                                                                                               |
| 4613 | MYCN   | multiple         | 1 | 0  | 1 Feingold_syndrome (531)                                                                                                                                                                              |
| 4618 | MYF6   | Muscular         | 2 | 10 | 1 Becker_muscular_dystrophy (193), Myopathy (1059)                                                                                                                                                     |
| 4620 | MYH2   | Muscular         | 1 | 2  | 1 Inclusion_body_myopathy (805)                                                                                                                                                                        |
| 4624 | MYH6   | Cardiovascular   | 2 | 28 | 1 Atrial_fibrillation (166), Cardiomyopathy (268)                                                                                                                                                      |
| 4625 | MYH7   | Grey             | 3 | 32 | 2 Cardiomyopathy (268), Central_core_disease (2287), Myopathy (1059)                                                                                                                                   |
| 4626 | MYH8   | multiple         | 2 | 1  | 1 Carney_complex (269), Trismus-pseudocomptodactyly_syndrome (1528)                                                                                                                                    |
| 4627 | MYH9   | Grey             | 5 | 40 | 3 Deafness (406), Epstein_syndrome (500), Fechtner_syndrome (530), May-Hegglin_anomaly (961), Sebastian_syndrome (1368)                                                                                |
| 4633 | MYL2   | Cardiovascular   | 1 | 24 | 1 Cardiomyopathy (268)                                                                                                                                                                                 |
| 4634 | MYL3   | Cardiovascular   | 1 | 24 | 1 Cardiomyopathy (268)                                                                                                                                                                                 |
| 4640 | MYO1A  | Ear,Nose,Throat  | 1 | 40 | 1 Deafness (406)                                                                                                                                                                                       |
| 4644 | MYO5A  | Dermatological   | 1 | 2  | 1 Griscelli_syndrome (627)                                                                                                                                                                             |
| 4646 | MYO6   | Ear,Nose,Throat  | 1 | 40 | 1 Deafness (406)                                                                                                                                                                                       |
| 4647 | MYO7A  | Grey             | 2 | 44 | 2 Deafness (406), Usher_syndrome (1551)                                                                                                                                                                |
| 4653 | MYOC   | Ophthalmological | 1 | 3  | 1 Glaucoma (589)                                                                                                                                                                                       |
| 4668 | NAGA   | Metabolic        | 2 | 0  | 1 Kanzaki_disease (837), Schindler_disease (1355)                                                                                                                                                      |
| 4669 | NAGLU  | Metabolic        | 1 | 1  | 1 Sanfilippo_syndrome (1348)                                                                                                                                                                           |
| 4683 | NBN    | Grey             | 2 | 36 | 2 Leukemia (886), Nijmegen_breakage_syndrome (1111)                                                                                                                                                    |
| 4687 | NCF1   | Immunological    | 1 | 3  | 1 Chronic_granulomatous_disease (327)                                                                                                                                                                  |
| 4688 | NCF2   | Immunological    | 1 | 3  | 1 Chronic_granulomatous_disease (327)                                                                                                                                                                  |
| 4692 | NDN    | multiple         | 1 | 1  | 1 Prader-Willi_syndrome (1254)                                                                                                                                                                         |
| 4693 | NDP    | Grey             | 3 | 2  | 2 Coats_disease (338), Exudative_vitreoretinopathy (515), Norrie_disease (1117)                                                                                                                        |
| 4703 | NEB    | Muscular         | 1 | 3  | 1 Nemaline_myopathy (1078)                                                                                                                                                                             |
| 4719 | NDUFS1 | multiple         | 1 | 6  | 1 Mitochondrial_complex_deficiency (1016)                                                                                                                                                              |

|      |         |                            |   |    |   |                                                                                                                                      |
|------|---------|----------------------------|---|----|---|--------------------------------------------------------------------------------------------------------------------------------------|
| 4720 | NDUFS2  | multiple                   | 1 | 6  | 1 | Mitochondrial_complex_deficiency (1016)                                                                                              |
| 4722 | NDUFS3  | Neurological               | 1 | 11 | 1 | Leigh_syndrome (877)                                                                                                                 |
| 4723 | NDUFV1  | Grey                       | 3 | 15 | 2 | Alexander_disease (79), Leigh_syndrome (877), Mitochondrial_complex_deficiency (1016)                                                |
| 4724 | NDUFS4  | Grey                       | 2 | 14 | 2 | Leigh_syndrome (877), Mitochondrial_complex_deficiency (1016)                                                                        |
| 4726 | NDUFS6  | multiple                   | 1 | 1  | 1 | Complex_mitochondrial_respiratory_chain_deficiency_of (351)                                                                          |
| 4728 | NDUFS8  | Neurological               | 1 | 11 | 1 | Leigh_syndrome (877)                                                                                                                 |
| 4729 | NDUFV2  | Neurological               | 1 | 10 | 1 | Parkinson_disease (1192)                                                                                                             |
| 4744 | NEFH    | Neurological               | 1 | 5  | 1 | Amyotrophic_lateral_sclerosis (104)                                                                                                  |
| 4747 | NEFL    | Neurological               | 1 | 17 | 1 | Charcot-Marie-Tooth_disease (301)                                                                                                    |
| 4758 | NEU1    | Metabolic                  | 1 | 1  | 1 | Sialidosis (1391)                                                                                                                    |
| 4760 | NEUROD1 | Endocrine                  | 1 | 26 | 1 | Diabetes_mellitus (427)                                                                                                              |
| 4763 | NF1     | Cancer                     | 5 | 38 | 1 | Leukemia (886), Neurofibromatosis (1095), Neurofibromatosis-Noonan_syndrome (1096), Neurofibromatosis (1097), Watson_syndrome (1581) |
| 4771 | NF2     | Cancer                     | 3 | 5  | 1 | Meningioma (986), Neurofibromatosis (1097), Schwannomatosis (1360)                                                                   |
| 4792 | NFKBIA  | Dermatological             | 1 | 7  | 1 | Ectodermal_dysplasia (466)                                                                                                           |
| 4795 | NFKBIL1 | Connective_tissue_disorder | 1 | 7  | 1 | Rheumatoid_arthritis (1324)                                                                                                          |
| 4803 | NGFB    | Neurological               | 1 | 7  | 1 | Neuropathy (1099)                                                                                                                    |
| 4810 | NHS     | Ophthalmological           | 1 | 0  | 1 | Nance-Horan_syndrome (1071)                                                                                                          |
| 4830 | NME1    | Cancer                     | 1 | 1  | 1 | Neuroblastoma (1091)                                                                                                                 |
| 4838 | NODAL   | Developmental              | 1 | 1  | 1 | Situs_ambiguus (1399)                                                                                                                |
| 4842 | NOS1    | Developmental              | 1 | 0  | 1 | Pyloric_stenosis_infantile_hypertrophic (1294)                                                                                       |
| 4843 | NOS2A   | Immunological              | 1 | 4  | 1 | Malaria (940)                                                                                                                        |
| 4846 | NOS3    | Grey                       | 4 | 22 | 2 | Alzheimer_disease (98), Coronary_spasms (2365), Hypertension (752), Placental_abruption (1233)                                       |
| 4854 | NOTCH3  | Cardiovascular             | 1 | 0  | 1 | Cerebral_arteriopathy_with_subcortical_infarcts_and_leukoencephalopathy (2291)                                                       |
| 4860 | NP      | Immunological              | 1 | 0  | 1 | Nucleoside_phosphorylase_deficiency_immunodeficiency_due_to (1122)                                                                   |
| 4864 | NPC1    | Metabolic                  | 1 | 2  | 1 | Niemann-Pick_disease (1107)                                                                                                          |
| 4867 | NPHP1   | Grey                       | 3 | 5  | 2 | Joubert_syndrome (831), Nephronophthisis (1082), Senior-Loken_syndrome (1375)                                                        |
| 4868 | NPHS1   | Renal                      | 1 | 1  | 1 | Nephrotic_syndrome (1087)                                                                                                            |
| 4869 | NPM1    | Cancer                     | 1 | 36 | 1 | Leukemia (886)                                                                                                                       |
| 4882 | NPR2    | Skeletal                   | 1 | 1  | 1 | Acromesomelic_dysplasia (39)                                                                                                         |
| 4891 | SLC11A2 | Hematological              | 1 | 8  | 1 | Anemia (110)                                                                                                                         |
| 4893 | NRAS    | Cancer                     | 1 | 33 | 1 | Colon_cancer (346)                                                                                                                   |
| 4901 | NRL     | Ophthalmological           | 2 | 32 | 1 | Retinal_cone_dystrophy (1315), Retinitis_pigmentosa (1316)                                                                           |
| 4902 | NRTN    | Gastrointestinal           | 1 | 6  | 1 | Hirschsprung_disease (681)                                                                                                           |
| 4914 | NTRK1   | Grey                       | 2 | 1  | 2 | Insensitivity_to_pain (811), Medullary_thyroid_carcinoma (2969)                                                                      |
| 4915 | NTRK2   | Nutritional                | 1 | 20 | 1 | Obesity (1126)                                                                                                                       |
| 4920 | ROR2    | Grey                       | 2 | 4  | 2 | Brachydactyly (224), Robinow_syndrome_autosomal_recessive (1335)                                                                     |
| 4926 | NUMA1   | Cancer                     | 1 | 36 | 1 | Leukemia (886)                                                                                                                       |
| 4929 | NR4A2   | Neurological               | 1 | 10 | 1 | Parkinson_disease (1192)                                                                                                             |
| 4935 | GPR143  | Ophthalmological           | 1 | 2  | 1 | Ocular_albinism (1130)                                                                                                               |
| 4938 | OAS1    | Immunological              | 1 | 1  | 1 | Viral_infection (1562)                                                                                                               |
| 4942 | OAT     | Metabolic                  | 1 | 0  | 1 | Gyrate_atrophy_of_choroid_and_retina_with_ornithinemia_B6_responsive_or_unresponsive (632)                                           |
| 4948 | OCA2    | Dermatological             | 1 | 2  | 1 | Albinism (72)                                                                                                                        |
| 4952 | OCRL    | Grey                       | 2 | 1  | 2 | Dent_disease (416), Lowe_syndrome (914)                                                                                              |
| 4953 | ODC1    | Cancer                     | 1 | 33 | 1 | Colon_cancer (346)                                                                                                                   |
| 4968 | OGG1    | Cancer                     | 1 | 6  | 1 | Renal_cell_carcinoma (1308)                                                                                                          |
| 4973 | OLR1    | Cardiovascular             | 1 | 9  | 1 | Myocardial_infarction (1054)                                                                                                         |
| 4976 | OPA1    | Ophthalmological           | 2 | 4  | 1 | Glaucoma (589), Optic_atrophy (1144)                                                                                                 |
| 4978 | OPCML   | Cancer                     | 1 | 0  | 1 | Epithelial_ovarian_cancer_somatic (498)                                                                                              |



|      |          |                            |   |    |                                                                                                                                                                        |
|------|----------|----------------------------|---|----|------------------------------------------------------------------------------------------------------------------------------------------------------------------------|
| 5224 | PGAM2    | Muscular                   | 1 | 9  | 1 Myopathy (1059)                                                                                                                                                      |
| 5230 | PGK1     | Grey                       | 2 | 9  | 2 Hemolytic_anemia (660), Myoglobinuria/hemolysis_due_to_PGK_deficiency (1056)                                                                                         |
| 5243 | ABCB1    | Unclassified               | 1 | 0  | 0 Colchicine_resistance (343)                                                                                                                                          |
| 5244 | ABCB4    | Gastrointestinal           | 2 | 3  | 1 Cholelithiasis (309), Cholestasis (310)                                                                                                                              |
| 5245 | PHB      | Cancer                     | 1 | 18 | 1 Breast_cancer (228)                                                                                                                                                  |
| 5251 | PHEX     | Metabolic                  | 1 | 1  | 1 Hypophosphatemia (783)                                                                                                                                               |
| 5255 | PHKA1    | Muscular                   | 1 | 1  | 1 Muscle_hypertrophy (1039)                                                                                                                                            |
| 5256 | PHKA2    | Metabolic                  | 1 | 1  | 1 Glycogenosis (609)                                                                                                                                                   |
| 5257 | PHKB     | Metabolic                  | 1 | 0  | 1 Phosphorylase_kinase_deficiency_of_liver_and_muscle,_autosomal_recessive (1222)                                                                                      |
| 5261 | PHKG2    | Metabolic                  | 1 | 1  | 1 Glycogenosis (609)                                                                                                                                                   |
| 5264 | PHYH     | Neurological               | 1 | 4  | 1 Refsum_disease (1307)                                                                                                                                                |
| 5265 | SERPINA1 | Grey                       | 2 | 1  | 2 Emphysema (475), Hemorrhagic_diathesis (664)                                                                                                                         |
| 5274 | SERPINI1 | Neurological               | 1 | 1  | 1 Encephalopathy (476)                                                                                                                                                 |
| 5277 | PIGA     | Hematological              | 1 | 0  | 1 Paroxysmal_nocturnal_hemoglobinuria (3195)                                                                                                                           |
| 5290 | PIK3CA   | Cancer                     | 3 | 51 | 1 Breast_cancer (228), Colon_cancer (346), Ovarian_cancer (1170)                                                                                                       |
| 5308 | PITX2    | Grey                       | 3 | 1  | 2 Iridogoniodysgenesis (822), Rieger_syndrome (1331), Ring_dermoid_of_cornea (1332)                                                                                    |
| 5309 | PITX3    | Ophthalmological           | 2 | 17 | 1 Anterior_segment_anomalies_and_cataract (126), Cataract (277)                                                                                                        |
| 5310 | PKD1     | Renal                      | 1 | 3  | 1 Polycystic_kidney_disease (1241)                                                                                                                                     |
| 5311 | PKD2     | Renal                      | 1 | 3  | 1 Polycystic_kidney_disease (1241)                                                                                                                                     |
| 5313 | PKLR     | Hematological              | 1 | 8  | 1 Anemia (110)                                                                                                                                                         |
| 5314 | PKHD1    | Renal                      | 1 | 3  | 1 Polycystic_kidney_disease (1241)                                                                                                                                     |
| 5317 | PKP1     | Dermatological             | 1 | 7  | 1 Ectodermal_dysplasia (466)                                                                                                                                           |
| 5318 | PKP2     | Cardiovascular             | 1 | 2  | 1 Arrhythmogenic_right_ventricular_dysplasia (144)                                                                                                                     |
| 5320 | PLA2G2A  | Cancer                     | 1 | 33 | 1 Colon_cancer (346)                                                                                                                                                   |
| 5324 | PLAG1    | Cancer                     | 1 | 2  | 1 Adenomas (47)                                                                                                                                                        |
| 5328 | PLAU     | Neurological               | 1 | 11 | 1 Alzheimer_disease (98)                                                                                                                                               |
| 5339 | PLEC1    | Grey                       | 2 | 27 | 2 Epidermolysis_bullosa (493), Muscular_dystrophy (1040)                                                                                                               |
| 5340 | PLG      | Grey                       | 2 | 0  | 2 Conjunctivitis_ligeneous (356), Plasminogen_deficiency (1235)                                                                                                        |
| 5345 | SERPINF2 | Hematological              | 1 | 0  | 1 Plasmin_inhibitor_deficiency (1234)                                                                                                                                  |
| 5350 | PLN      | Cardiovascular             | 1 | 24 | 1 Cardiomyopathy (268)                                                                                                                                                 |
| 5351 | PLOD1    | Connective_tissue_disorder | 2 | 8  | 1 Ehlers-Danlos_syndrome (470), Nevo_syndrome (1103)                                                                                                                   |
| 5352 | PLOD2    | Unclassified               | 1 | 0  | 0 Bruck_syndrome (233)                                                                                                                                                 |
| 5354 | PLP1     | Neurological               | 2 | 8  | 1 Pelizaeus-Merzbacher_disease (1200), Spastic_ataxia/paraplegia (1418)                                                                                                |
| 5371 | PML      | Cancer                     | 1 | 36 | 1 Leukemia (886)                                                                                                                                                       |
| 5373 | PMM2     | Metabolic                  | 1 | 2  | 1 Carbohydrate-deficient_glycoprotein_syndrome (263)                                                                                                                   |
| 5376 | PMP22    | Grey                       | 4 | 22 | 2 Charcot-Marie-Tooth_disease (301), Dejerine-Sottas_disease (410), Neuropathy (1099), Roussy-Levy_syndrome (1339)                                                     |
| 5378 | PMS1     | Cancer                     | 1 | 33 | 1 Colon_cancer (346)                                                                                                                                                   |
| 5395 | PMS2     | Grey                       | 3 | 33 | 2 Colon_cancer (346), Neuroectodermal_tumors (1093), Turcot_syndrome (1536)                                                                                            |
| 5428 | POLG     | Grey                       | 3 | 2  | 2 Alpers_syndrome (86), Progressive_external_ophthalmoplegia_with_mitochondrial_DNA_deletions (1265), Sensory_ataxic_neuropathy_dysarthria_and_ophthalmoparesis (1376) |
| 5429 | POLH     | Dermatological             | 1 | 7  | 1 Xeroderma_pigmentosum (1608)                                                                                                                                         |
| 5443 | POMC     | Nutritional                | 1 | 20 | 1 Obesity (1126)                                                                                                                                                       |
| 5444 | PON1     | Cardiovascular             | 1 | 5  | 1 Coronary_artery_disease (365)                                                                                                                                        |
| 5445 | PON2     | Cardiovascular             | 1 | 5  | 1 Coronary_artery_disease (365)                                                                                                                                        |
| 5447 | POR      | Grey                       | 3 | 3  | 2 Adrenal_hyperplasia_congenital (53), Antley-Bixler_syndrome (128), Disordered_steroidogenesis_isolated (438)                                                         |
| 5449 | POU1F1   | Endocrine                  | 1 | 3  | 1 Pituitary_hormone_deficiency (5232)                                                                                                                                  |
| 5456 | POU3F4   | Ear,Nose,Throat            | 1 | 40 | 1 Deafness (406)                                                                                                                                                       |

|      |         |                  |   |    |   |                                                                                                                                                                                                                                                                        |
|------|---------|------------------|---|----|---|------------------------------------------------------------------------------------------------------------------------------------------------------------------------------------------------------------------------------------------------------------------------|
| 5459 | POU4F3  | Ear,Nose,Throat  | 1 | 40 | 1 | Deafness (406)                                                                                                                                                                                                                                                         |
| 5465 | PPARA   | Metabolic        | 1 | 0  | 1 | Hyperapobetalipoproteinemia (719)                                                                                                                                                                                                                                      |
| 5468 | PPARG   | Grey             | 5 | 55 | 4 | Diabetes_mellitus (427), Glioblastoma (590), Insulin_resistance (814), Lipodystrophy (902), Obesity (1126)                                                                                                                                                             |
| 5476 | PPGB    | Metabolic        | 1 | 0  | 1 | Galactosialidosis (568)                                                                                                                                                                                                                                                |
| 5498 | PPOX    | Metabolic        | 1 | 5  | 1 | Porphyria (1249)                                                                                                                                                                                                                                                       |
| 5506 | PPP1R3A | Metabolic        | 1 | 2  | 1 | Insulin_resistance (814)                                                                                                                                                                                                                                               |
| 5519 | PPP2R1B | Cancer           | 1 | 3  | 1 | Lung_cancer (918)                                                                                                                                                                                                                                                      |
| 5521 | PPP2R2B | Neurological     | 1 | 12 | 1 | Spinocerebellar_ataxia (1428)                                                                                                                                                                                                                                          |
| 5538 | PPT1    | Neurological     | 2 | 5  | 1 | Ceroid_lipofuscinosis (295), Ceroid-lipofuscinosis (296)                                                                                                                                                                                                               |
| 5546 | PRCC    | Cancer           | 1 | 6  | 1 | Renal_cell_carcinoma (1308)                                                                                                                                                                                                                                            |
| 5551 | PRF1    | Hematological    | 1 | 1  | 1 | Hemophagocytic_lymphohistiocytosis (662)                                                                                                                                                                                                                               |
| 5573 | PRKAR1A | Grey             | 5 | 11 | 3 | Adrenocortical_carcinoma (54), Carney_complex (269), Myxoma_intracardiac (1066), Pigmented_adrenocortical_disease_primary_isolated (3229), Thyroid_carcinoma (1503)                                                                                                    |
| 5578 | PRKCA   | Cancer           | 1 | 0  | 1 | Pituitary_tumor_invasive (7232)                                                                                                                                                                                                                                        |
| 5582 | PRKCG   | Neurological     | 1 | 12 | 1 | Spinocerebellar_ataxia (1428)                                                                                                                                                                                                                                          |
| 5589 | PRKCSH  | Gastrointestinal | 1 | 1  | 1 | Polycystic_liver_disease (3241)                                                                                                                                                                                                                                        |
| 5621 | PRNP    | Grey             | 5 | 5  | 2 | Creutzfeldt-Jakob_disease (388), Gerstmann-Straussler_disease (581), Huntington_disease (708), Insomnia (812), Prion_disease_with_protracted_course (1263)                                                                                                             |
| 5624 | PROC    | Hematological    | 1 | 8  | 1 | Thrombophilia (1497)                                                                                                                                                                                                                                                   |
| 5625 | PRODH   | Grey             | 2 | 9  | 2 | Hyperprolinemia (749), Schizophrenia (1359)                                                                                                                                                                                                                            |
| 5626 | PROP1   | Endocrine        | 1 | 3  | 1 | Pituitary_hormone_deficiency (5232)                                                                                                                                                                                                                                    |
| 5627 | PROS1   | Hematological    | 1 | 0  | 1 | Protein_S_deficiency (1273)                                                                                                                                                                                                                                            |
| 5630 | PRPH    | Neurological     | 1 | 5  | 1 | Amyotrophic_lateral_sclerosis (104)                                                                                                                                                                                                                                    |
| 5631 | PRPS1   | Metabolic        | 1 | 0  | 1 | Phosphoribosyl_pyrophosphate_synthetase-related_gout (1221)                                                                                                                                                                                                            |
| 5644 | PRSS1   | Gastrointestinal | 1 | 2  | 1 | Pancreatitis (1179)                                                                                                                                                                                                                                                    |
| 5649 | RELN    | Neurological     | 1 | 3  | 1 | Lissencephaly (908)                                                                                                                                                                                                                                                    |
| 5651 | PRSS7   | Gastrointestinal | 1 | 0  | 1 | Enterokinase_deficiency (487)                                                                                                                                                                                                                                          |
| 5660 | PSAP    | Grey             | 3 | 2  | 2 | Combined_SAP_deficiency (8350), Gaucher_disease (575), Metachromatic_leukodystrophy (996)                                                                                                                                                                              |
| 5663 | PSEN1   | Neurological     | 3 | 16 | 1 | Alzheimer_disease (98), Dementia (412), Pick_disease (1225)                                                                                                                                                                                                            |
| 5664 | PSEN2   | Neurological     | 1 | 11 | 1 | Alzheimer_disease (98)                                                                                                                                                                                                                                                 |
| 5723 | PSPH    | Metabolic        | 1 | 0  | 1 | Phosphoserine_phosphatase_deficiency (1223)                                                                                                                                                                                                                            |
| 5726 | TAS2R38 | Ear,Nose,Throat  | 1 | 0  | 1 | Phenylthiocarbamide_tasting (1217)                                                                                                                                                                                                                                     |
| 5727 | PTCH    | Grey             | 3 | 7  | 3 | Basal_cell_carcinoma (188), Basal_cell_nevus_syndrome (2188), Holoprosencephaly (689)                                                                                                                                                                                  |
| 5728 | PTEN    | Grey             | 9 | 28 | 2 | Bannayan-Riley-Ruvalcaba_syndrome (182), Cowden_disease (372), Endometrial_carcinoma (479), Lhermitte-Duclos_syndrome (895), Meningioma (986), Oligodendroglioma (1138), Prostate_cancer (1272), Thyroid_carcinoma (1503), VATER_association_with_hydrocephalus (1555) |
| 5729 | PTGDR   | Respiratory      | 1 | 12 | 1 | Asthma (153)                                                                                                                                                                                                                                                           |
| 5740 | PTGIS   | Cardiovascular   | 1 | 11 | 1 | Hypertension (752)                                                                                                                                                                                                                                                     |
| 5741 | PTH     | Endocrine        | 1 | 1  | 1 | Hypoparathyroidism (779)                                                                                                                                                                                                                                               |
| 5745 | PTHR1   | Grey             | 2 | 2  | 2 | Enchondromatosis (477), Metaphyseal_chondrodysplasia (997)                                                                                                                                                                                                             |
| 5770 | PTPN1   | Metabolic        | 1 | 2  | 1 | Insulin_resistance (814)                                                                                                                                                                                                                                               |
| 5781 | PTPN11  | Grey             | 3 | 36 | 3 | Leopard_syndrome (880), Leukemia (886), Noonan_syndrome (1116)                                                                                                                                                                                                         |
| 5782 | PTPN12  | Cancer           | 1 | 33 | 1 | Colon_cancer (346)                                                                                                                                                                                                                                                     |
| 5788 | PTPRC   | Grey             | 2 | 8  | 2 | Multiple_sclerosis (9038), Severe_combined_immunodeficiency (1383)                                                                                                                                                                                                     |
| 5795 | PTPRJ   | Cancer           | 1 | 33 | 1 | Colon_cancer (346)                                                                                                                                                                                                                                                     |
| 5805 | PTS     | Metabolic        | 1 | 2  | 1 | Phenylketonuria (1216)                                                                                                                                                                                                                                                 |
| 5818 | PVRL1   | Grey             | 3 | 9  | 3 | Cleft_palate (336), Ectodermal_dysplasia (466), Zlotogora-Ogur_syndrome (1617)                                                                                                                                                                                         |
| 5824 | PEX19   | multiple         | 1 | 10 | 1 | Zellweger_syndrome (1615)                                                                                                                                                                                                                                              |
| 5825 | ABCD3   | multiple         | 1 | 10 | 1 | Zellweger_syndrome (1615)                                                                                                                                                                                                                                              |
| 5828 | PXMP3   | Grey             | 2 | 12 | 2 | Refsum_disease (1307), Zellweger_syndrome (1615)                                                                                                                                                                                                                       |

|      |          |                  |   |    |                                                                                                                                                                                                                 |
|------|----------|------------------|---|----|-----------------------------------------------------------------------------------------------------------------------------------------------------------------------------------------------------------------|
| 5830 | PEX5     | Grey             | 2 | 11 | 2 Adrenoleukodystrophy (56), Zellweger_syndrome (1615)                                                                                                                                                          |
| 5832 | ALDH18A1 | Metabolic        | 1 | 0  | 1 Hyperammonemia (717)                                                                                                                                                                                          |
| 5836 | PYGL     | Metabolic        | 1 | 8  | 1 Glycogen_storage_disease (610)                                                                                                                                                                                |
| 5837 | PYGM     | Metabolic        | 1 | 0  | 1 McArdle_disease (962)                                                                                                                                                                                         |
| 5860 | QDPR     | Metabolic        | 1 | 2  | 1 Phenylketonuria (1216)                                                                                                                                                                                        |
| 5873 | RAB27A   | Dermatological   | 1 | 2  | 1 Griscelli_syndrome (627)                                                                                                                                                                                      |
| 5880 | RAC2     | Immunological    | 1 | 0  | 1 Neutrophil_immunodeficiency_syndrome (1102)                                                                                                                                                                   |
| 5888 | RAD51    | Cancer           | 1 | 18 | 1 Breast_cancer (228)                                                                                                                                                                                           |
| 5896 | RAG1     | Immunological    | 2 | 7  | 1 Omenn_syndrome (1141), Severe_combined_immunodeficiency (1383)                                                                                                                                                |
| 5897 | RAG2     | Immunological    | 2 | 7  | 1 Omenn_syndrome (1141), Severe_combined_immunodeficiency (1383)                                                                                                                                                |
| 5910 | RAP1GDS1 | Cancer           | 1 | 9  | 1 Lymphoma (925)                                                                                                                                                                                                |
| 5913 | RAPSN    | Muscular         | 1 | 6  | 1 Myasthenic_syndrome (1042)                                                                                                                                                                                    |
| 5921 | RASA1    | Grey             | 3 | 3  | 3 Basal_cell_carcinoma (188), Capillary_malformations (261), Parkes_Weber_syndrome (1191)                                                                                                                       |
| 5925 | RB1      | Cancer           | 2 | 3  | 1 Bladder_cancer (207), Retinoblastoma (1317)                                                                                                                                                                   |
| 5932 | RBBP8    | Cancer           | 1 | 8  | 1 Pancreatic_cancer (1178)                                                                                                                                                                                      |
| 5950 | RBP4     | Ophthalmological | 1 | 0  | 1 Retinol_binding_protein,_deficiency_of (1318)                                                                                                                                                                 |
| 5956 | OPN1LW   | Ophthalmological | 2 | 2  | 1 Blue-cone_monochromacy (214), Colorblindness (348)                                                                                                                                                            |
| 5959 | RDH5     | Ophthalmological | 1 | 2  | 1 Fundus_albipunctatus (562)                                                                                                                                                                                    |
| 5961 | RDS      | Ophthalmological | 4 | 32 | 1 Butterfly_dystrophy,_retinal (239), Foveomacular_dystrophy,_adult-onset,_with_choroidal_neovascularization (549), Macular_dystrophy (2937), Retinitis_pigmentosa (1316)                                       |
| 5972 | REN      | Grey             | 2 | 3  | 2 Hyperproreninemia (750), Renal_tubular_dysgenesis (9308)                                                                                                                                                      |
| 5979 | RET      | Grey             | 5 | 9  | 3 Central_hypoventilation_syndrome (287), Colonic_aganglionosis,_total,_with_small_bowel_involvement (347), Hirschsprung_disease (681), Medullary_thyroid_carcinoma (2969), Multiple_endocrine_neoplasia (1037) |
| 5993 | RFX5     | Immunological    | 1 | 4  | 1 Bare_lymphocyte_syndrome (184)                                                                                                                                                                                |
| 5994 | RFXAP    | Immunological    | 1 | 4  | 1 Bare_lymphocyte_syndrome (184)                                                                                                                                                                                |
| 5995 | RGR      | Ophthalmological | 1 | 29 | 1 Retinitis_pigmentosa (1316)                                                                                                                                                                                   |
| 6005 | RHAG     | Hematological    | 2 | 8  | 1 Anemia (110), Rh-mod_syndrome (1326)                                                                                                                                                                          |
| 6006 | RHCE     | Hematological    | 2 | 23 | 1 Blood_group (212), Rh-negative_blood_type (1327)                                                                                                                                                              |
| 6007 | RHD      | Hematological    | 1 | 1  | 1 Rh-negative_blood_type (1327)                                                                                                                                                                                 |
| 6010 | RHO      | Ophthalmological | 2 | 32 | 1 Night_blindness (1110), Retinitis_pigmentosa (1316)                                                                                                                                                           |
| 6011 | GRK1     | Ophthalmological | 1 | 1  | 1 Oguchi_disease (1137)                                                                                                                                                                                         |
| 6017 | RLBP1    | Ophthalmological | 4 | 30 | 1 Bothnia_retinal_dystrophy (221), Fundus_albipunctatus (562), Newfoundland_rod-cone_dystrophy (1105), Retinitis_pigmentosa (1316)                                                                              |
| 6023 | RMRP     | Grey             | 2 | 2  | 2 Cartilage-hair_hypoplasia (276), Metaphyseal_chondrodysplasia (997)                                                                                                                                           |
| 6041 | RNASEL   | Cancer           | 1 | 11 | 1 Prostate_cancer (1272)                                                                                                                                                                                        |
| 6049 | RNF6     | Cancer           | 1 | 3  | 1 Esophageal_cancer (508)                                                                                                                                                                                       |
| 6094 | ROM1     | Ophthalmological | 1 | 29 | 1 Retinitis_pigmentosa (1316)                                                                                                                                                                                   |
| 6100 | RP9      | Ophthalmological | 1 | 29 | 1 Retinitis_pigmentosa (1316)                                                                                                                                                                                   |
| 6101 | RP1      | Grey             | 2 | 32 | 2 Hypertriglyceridemia (757), Retinitis_pigmentosa (1316)                                                                                                                                                       |
| 6102 | RP2      | Ophthalmological | 1 | 29 | 1 Retinitis_pigmentosa (1316)                                                                                                                                                                                   |
| 6103 | RPGR     | Ophthalmological | 3 | 36 | 1 Cone_dystrophy (352), Macular_degeneration (937), Retinitis_pigmentosa (1316)                                                                                                                                 |
| 6121 | RPE65    | Ophthalmological | 2 | 32 | 1 Leber_congenital_amaurosis (873), Retinitis_pigmentosa (1316)                                                                                                                                                 |
| 6197 | RPS6KA3  | Grey             | 2 | 23 | 2 Coffin-Lowry_syndrome (341), Mental_retardation (990)                                                                                                                                                         |
| 6223 | RPS19    | Hematological    | 1 | 8  | 1 Anemia (110)                                                                                                                                                                                                  |
| 6247 | RS1      | Ophthalmological | 1 | 0  | 1 Retinoschisis (1320)                                                                                                                                                                                          |
| 6261 | RYR1     | Grey             | 2 | 2  | 2 Central_core_disease (2287), Malignant_hyperthermia_susceptibility (942)                                                                                                                                      |
| 6262 | RYR2     | Cardiovascular   | 2 | 4  | 1 Arrhythmogenic_right_ventricular_dysplasia (144), Ventricular_tachycardia (1558)                                                                                                                              |
| 6295 | SAG      | Ophthalmological | 1 | 1  | 1 Oguchi_disease (1137)                                                                                                                                                                                         |
| 6299 | SALL1    | multiple         | 1 | 0  | 1 Townes-Brocks_syndrome (1514)                                                                                                                                                                                 |
| 6303 | SAT      | Dermatological   | 1 | 3  | 1 Keratosis_palmoplantaria_striata (847)                                                                                                                                                                        |

|      |         |                  |   |    |                                                                                                                                                                                                         |
|------|---------|------------------|---|----|---------------------------------------------------------------------------------------------------------------------------------------------------------------------------------------------------------|
| 6309 | SC5DL   | Metabolic        | 1 | 0  | 1 Lathosterolosis (869)                                                                                                                                                                                 |
| 6310 | ATXN1   | Neurological     | 1 | 12 | 1 Spinocerebellar_ataxia (1428)                                                                                                                                                                         |
| 6311 | ATXN2   | Neurological     | 1 | 12 | 1 Spinocerebellar_ataxia (1428)                                                                                                                                                                         |
| 6314 | ATXN7   | Neurological     | 1 | 12 | 1 Spinocerebellar_ataxia (1428)                                                                                                                                                                         |
| 6315 | KLHL1AS | Neurological     | 1 | 12 | 1 Spinocerebellar_ataxia (1428)                                                                                                                                                                         |
| 6323 | SCN1A   | Neurological     | 1 | 16 | 1 Epilepsy (495)                                                                                                                                                                                        |
| 6324 | SCN1B   | Neurological     | 1 | 1  | 1 Generalized_epilepsy (578)                                                                                                                                                                            |
| 6325 | SCN2A1  | Neurological     | 1 | 0  | 1 Seizures (1371)                                                                                                                                                                                       |
| 6329 | SCN4A   | Grey             | 6 | 9  | 3 Cramps,_potassium-aggravated (376), Hyperkalemic_periodic_paralysis (733), Hypokalemic_periodic_paralysis (776), Myasthenic_syndrome (1042), Myotonia_congenita (1062), Paramyotonia_congenita (1188) |
| 6331 | SCN5A   | Cardiovascular   | 5 | 6  | 1 Brugada_syndrome (234), Heart_block (647), Long_QT_syndrome (912), Sick_sinus_syndrome (1394), Ventricular_fibrillation,_idiopathic (3558)                                                            |
| 6335 | SCN9A   | Neurological     | 1 | 0  | 1 Erythralgia (502)                                                                                                                                                                                     |
| 6337 | SCNN1A  | Endocrine        | 1 | 5  | 1 Pseudohypoaldosteronism (1281)                                                                                                                                                                        |
| 6338 | SCNN1B  | Grey             | 2 | 5  | 2 Liddle_syndrome (896), Pseudohypoaldosteronism (1281)                                                                                                                                                 |
| 6340 | SCNN1G  | Grey             | 2 | 5  | 2 Liddle_syndrome (896), Pseudohypoaldosteronism (1281)                                                                                                                                                 |
| 6341 | SCO1    | Gastrointestinal | 1 | 0  | 1 Hepatic_failure,_early_onset,_and_neurologic_disorder (666)                                                                                                                                           |
| 6352 | CCL5    | Immunological    | 1 | 3  | 1 HIV (684)                                                                                                                                                                                             |
| 6387 | CXCL12  | Immunological    | 1 | 2  | 1 AIDS (70)                                                                                                                                                                                             |
| 6389 | SDHA    | Grey             | 2 | 14 | 2 Leigh_syndrome (877), Mitochondrial_complex_deficiency (1016)                                                                                                                                         |
| 6390 | SDHB    | Cancer           | 2 | 3  | 1 Paragangliomas (1186), Pheochromocytoma (1218)                                                                                                                                                        |
| 6391 | SDHC    | Cancer           | 1 | 2  | 1 Paragangliomas (1186)                                                                                                                                                                                 |
| 6392 | SDHD    | Cancer           | 4 | 3  | 1 Carcinoid_tumors,_intestinal (265), Merkel_cell_carcinoma (992), Paragangliomas (1186), Pheochromocytoma (1218)                                                                                       |
| 6399 | TRAPPC2 | Skeletal         | 1 | 4  | 1 Spondyloepiphyseal_dysplasia (1435)                                                                                                                                                                   |
| 6403 | SELP    | Immunological    | 1 | 4  | 1 Atopy (164)                                                                                                                                                                                           |
| 6435 | SFTPA1  | Respiratory      | 1 | 3  | 1 Pulmonary_fibrosis (1291)                                                                                                                                                                             |
| 6439 | SFTPB   | Respiratory      | 1 | 3  | 1 Pulmonary_fibrosis (1291)                                                                                                                                                                             |
| 6440 | SFTPC   | Respiratory      | 3 | 4  | 1 Pneumonitis,_desquamative_interstitial (1238), Pulmonary_fibrosis (1291), Surfactant_deficiency (1464)                                                                                                |
| 6442 | SGCA    | Muscular         | 1 | 17 | 1 Muscular_dystrophy (1040)                                                                                                                                                                             |
| 6443 | SGCB    | Muscular         | 1 | 17 | 1 Muscular_dystrophy (1040)                                                                                                                                                                             |
| 6444 | SGCD    | Grey             | 2 | 38 | 2 Cardiomyopathy (268), Muscular_dystrophy (1040)                                                                                                                                                       |
| 6445 | SGCG    | Muscular         | 1 | 17 | 1 Muscular_dystrophy (1040)                                                                                                                                                                             |
| 6448 | SGSH    | Metabolic        | 1 | 1  | 1 Sanfilippo_syndrome (1348)                                                                                                                                                                            |
| 6452 | SH3BP2  | Unclassified     | 1 | 0  | 0 Cherubism (305)                                                                                                                                                                                       |
| 6468 | FBXW4   | Skeletal         | 1 | 1  | 1 Split-hand/foot_malformation (1430)                                                                                                                                                                   |
| 6469 | SHH     | Grey             | 3 | 5  | 3 Coloboma,_ocular (345), Holoprosencephaly (689), Solitary_median_maxillary_central_incisor (1414)                                                                                                     |
| 6473 | SHOX    | Skeletal         | 3 | 2  | 1 Langer_mesomelic_dysplasia (862), Leri-Weill_dyschondrosteosis (883), Short_stature (1387)                                                                                                            |
| 6476 | SI      | Metabolic        | 1 | 0  | 1 Sucrose_intolerance (1458)                                                                                                                                                                            |
| 6492 | SIM1    | Nutritional      | 1 | 20 | 1 Obesity (1126)                                                                                                                                                                                        |
| 6496 | SIX3    | Developmental    | 1 | 4  | 1 Holoprosencephaly (689)                                                                                                                                                                               |
| 6513 | SLC2A1  | Metabolic        | 1 | 0  | 1 Glucose_transport_defect,_blood-brain_barrier (600)                                                                                                                                                   |
| 6514 | SLC2A2  | Grey             | 2 | 26 | 2 Diabetes_mellitus (427), Fanconi-Bickel_syndrome (524)                                                                                                                                                |
| 6517 | SLC2A4  | Endocrine        | 1 | 26 | 1 Diabetes_mellitus (427)                                                                                                                                                                               |
| 6519 | SLC3A1  | Grey             | 2 | 1  | 2 Cystinuria (401), Homozygous_2p16_deletion_syndrome (701)                                                                                                                                             |
| 6521 | SLC4A1  | Grey             | 5 | 40 | 2 Blood_group (212), Elliptocytosis (472), Hemolytic_anemia (660), Renal_tubular_acidosis (7308), Spherocytosis (1423)                                                                                  |
| 6523 | SLC5A1  | Metabolic        | 1 | 0  | 1 Glucose/galactose_malabsorption (599)                                                                                                                                                                 |
| 6524 | SLC5A2  | Renal            | 1 | 0  | 1 Renal_glucosuria (3308)                                                                                                                                                                               |
| 6528 | SLC5A5  | Endocrine        | 1 | 6  | 1 Hypothyroidism (787)                                                                                                                                                                                  |



|      |         |                            |   |    |   |                                                                                                      |
|------|---------|----------------------------|---|----|---|------------------------------------------------------------------------------------------------------|
| 6530 | SLC6A2  | Cardiovascular             | 1 | 0  | 1 | Orthostatic_intolerance (1150)                                                                       |
| 6532 | SLC6A4  | Psychiatric                | 2 | 2  | 1 | Anxiety-related_personality_traits (129), Obsessive-compulsive_disorder (1128)                       |
| 6535 | SLC6A8  | Neurological               | 2 | 23 | 1 | Creatine_deficiency_syndrome,_X-linked (2385), Mental_retardation (990)                              |
| 6555 | SLC10A2 | Gastrointestinal           | 1 | 0  | 1 | Bile_acid_malabsorption,_primary (202)                                                               |
| 6556 | SLC11A1 | Immunological              | 1 | 4  | 1 | Mycobacterial_infection (1043)                                                                       |
| 6557 | SLC12A1 | multiple                   | 1 | 4  | 1 | Barter_syndrome (187)                                                                                |
| 6559 | SLC12A3 | Renal                      | 1 | 0  | 1 | Gitelman_syndrome (587)                                                                              |
| 6563 | SLC14A1 | Hematological              | 1 | 22 | 1 | Blood_group (212)                                                                                    |
| 6567 | SLC16A2 | Neurological               | 1 | 0  | 1 | Allan-Herndon-Dudley_syndrome (82)                                                                   |
| 6569 | SLC34A1 | Grey                       | 2 | 6  | 2 | Osteoporosis (1163), Urolithiasis (1550)                                                             |
| 6583 | SLC22A4 | Connective_tissue_disorder | 1 | 7  | 1 | Rheumatoid_arthritis (1324)                                                                          |
| 6584 | SLC22A5 | Metabolic                  | 1 | 0  | 1 | Carnitine_deficiency (272)                                                                           |
| 6591 | SNAI2   | multiple                   | 1 | 3  | 1 | Waardenburg_syndrome (1574)                                                                          |
| 6598 | SMARCB1 | Cancer                     | 1 | 0  | 1 | Rhabdoid_tumors (1322)                                                                               |
| 6606 | SMN1    | Muscular                   | 1 | 6  | 1 | Spinal_muscular_atrophy (1426)                                                                       |
| 6608 | SMO     | Cancer                     | 1 | 3  | 1 | Basal_cell_carcinoma (188)                                                                           |
| 6609 | SMPD1   | Metabolic                  | 1 | 2  | 1 | Niemann-Pick_disease (1107)                                                                          |
| 6611 | SMS     | Neurological               | 1 | 23 | 1 | Mental_retardation (990)                                                                             |
| 6620 | SNCB    | Neurological               | 1 | 5  | 1 | Dementia (412)                                                                                       |
| 6622 | SNCA    | Neurological               | 2 | 15 | 1 | Dementia (412), Parkinson_disease (1192)                                                             |
| 6638 | SNRPN   | multiple                   | 1 | 1  | 1 | Prader-Willi_syndrome (1254)                                                                         |
| 6647 | SOD1    | Neurological               | 1 | 5  | 1 | Amyotrophic_lateral_sclerosis (104)                                                                  |
| 6649 | SOD3    | Unclassified               | 1 | 0  | 0 | Superoxide_dismutase,_elevated_extracellular (1461)                                                  |
| 6654 | SOS1    | Connective_tissue_disorder | 1 | 1  | 1 | Fibromatosis (537)                                                                                   |
| 6657 | SOX2    | Ophthalmological           | 1 | 0  | 1 | Anophthalmia (122)                                                                                   |
| 6658 | SOX3    | Grey                       | 2 | 23 | 2 | Infundibular_hypoplasia_and_hypopituitarism (809), Mental_retardation (990)                          |
| 6662 | SOX9    | Skeletal                   | 2 | 0  | 1 | Acampomelic_campomelic_dysplasia (18), Campomelic_dysplasia (255)                                    |
| 6663 | SOX10   | Grey                       | 3 | 1  | 2 | PCWH (1198), Waardenburg-Shah_syndrome (1573), Yemenite_deaf-blind_hypopigmentation_syndrome (1614)  |
| 6683 | SPAST   | Neurological               | 1 | 8  | 1 | Spastic_ataxia/paraplegia (1418)                                                                     |
| 6687 | SPG7    | Neurological               | 1 | 8  | 1 | Spastic_ataxia/paraplegia (1418)                                                                     |
| 6690 | SPINK1  | Gastrointestinal           | 3 | 2  | 1 | Fibrocalculous_pancreatic_diabetes (535), Pancreatitis (1179), Tropical_calcific_pancreatitis (1529) |
| 6697 | SPR     | Metabolic                  | 1 | 0  | 1 | Sepiapterin_reductase_deficiency (1377)                                                              |
| 6708 | SPTA1   | Hematological              | 3 | 5  | 1 | Elliptocytosis (472), Pyropoikilocytosis (1296), Spherocytosis (1423)                                |
| 6710 | SPTB    | Hematological              | 3 | 13 | 1 | Anemia (110), Elliptocytosis (472), Spherocytosis (1423)                                             |
| 6714 | SRC     | Cancer                     | 1 | 33 | 1 | Colon_cancer (346)                                                                                   |
| 6716 | SRD5A2  | Unclassified               | 1 | 0  | 0 | Pseudovaginal_perineoscrotal_hypospadias (1283)                                                      |
| 6736 | SRY     | Endocrine                  | 1 | 1  | 1 | Gonadal_dysgenesis (619)                                                                             |
| 6755 | SSTR5   | Endocrine                  | 1 | 1  | 1 | Acromegaly (38)                                                                                      |
| 6756 | SSX1    | Cancer                     | 1 | 1  | 1 | Sarcoma,_synovial (1350)                                                                             |
| 6757 | SSX2    | Cancer                     | 1 | 1  | 1 | Sarcoma,_synovial (1350)                                                                             |
| 6770 | STAR    | Endocrine                  | 1 | 1  | 1 | Lipoid_adrenal_hyperplasia (903)                                                                     |
| 6772 | STAT1   | Grey                       | 2 | 4  | 1 | Mycobacterial_infection (1043), STAT1_deficiency (1441)                                              |
| 6777 | STAT5B  | Grey                       | 2 | 37 | 2 | Growth_hormone (628), Leukemia (886)                                                                 |
| 6785 | ELOVL4  | Ophthalmological           | 2 | 4  | 1 | Macular_dystrophy (2937), Stargardt_disease (1439)                                                   |
| 6792 | CDKL5   | Neurological               | 1 | 1  | 1 | Rett_syndrome (1321)                                                                                 |
| 6794 | STK11   | Cancer                     | 3 | 11 | 1 | Melanoma (978), Pancreatic_cancer (1178), Peutz-Jeghers_syndrome (1214)                              |
| 6821 | SUOX    | Metabolic                  | 1 | 0  | 1 | Sulfite_oxidase_deficiency (1460)                                                                    |
| 6833 | ABCC8   | Grey                       | 2 | 26 | 2 | Diabetes_mellitus (427), Hypoglycemia (772)                                                          |

|      |          |                            |   |    |   |                                                                                                    |
|------|----------|----------------------------|---|----|---|----------------------------------------------------------------------------------------------------|
| 6834 | SURF1    | Neurological               | 1 | 11 | 1 | Leigh_syndrome (877)                                                                               |
| 6853 | SYN1     | Neurological               | 1 | 16 | 1 | Epilepsy (495)                                                                                     |
| 6854 | SYN2     | Psychiatric                | 1 | 8  | 1 | Schizophrenia (1359)                                                                               |
| 6886 | TAL1     | Cancer                     | 1 | 36 | 1 | Leukemia (886)                                                                                     |
| 6887 | TAL2     | Cancer                     | 1 | 36 | 1 | Leukemia (886)                                                                                     |
| 6888 | TALDO1   | Metabolic                  | 1 | 0  | 1 | Transaldolase_deficiency (1515)                                                                    |
| 6891 | TAP2     | Immunological              | 2 | 4  | 1 | Bare_lymphocyte_syndrome (184), Wegener_granulomatosis (1583)                                      |
| 6892 | TAPBP    | Immunological              | 1 | 4  | 1 | Bare_lymphocyte_syndrome (184)                                                                     |
| 6898 | TAT      | Metabolic                  | 1 | 2  | 1 | Tyrosinemia (1540)                                                                                 |
| 6899 | TBX1     | Grey                       | 3 | 0  | 2 | Conotruncal_anomaly_face_syndrome (357), DiGeorge_syndrome (432), Velocardiofacial_syndrome (1556) |
| 6901 | TAZ      | Grey                       | 3 | 24 | 2 | Barth_syndrome (185), Cardiomyopathy (268), Noncompaction_of_left_ventricular_myocardium (1113)    |
| 6905 | TBCE     | Grey                       | 2 | 0  | 2 | Hypoparathyroidism-retardation-dysmorphism_syndrome (780), Kenny-Caffey_syndrome-1 (841)           |
| 6906 | SERPINA7 | Hematological              | 1 | 0  | 1 | Thyroxine-binding_globulin_deficiency (1506)                                                       |
| 6908 | TBP      | Neurological               | 3 | 25 | 1 | Huntington_disease (708), Parkinson_disease (1192), Spinocerebellar_ataxia (1428)                  |
| 6910 | TBX5     | Developmental              | 1 | 0  | 1 | Holt-Oram_syndrome (696)                                                                           |
| 6915 | TBXA2R   | Hematological              | 1 | 1  | 1 | Bleeding_disorder (209)                                                                            |
| 6926 | TBX3     | multiple                   | 1 | 0  | 1 | Ulnar-mammary_syndrome (1543)                                                                      |
| 6927 | TCF1     | Grey                       | 3 | 34 | 2 | Diabetes_mellitus (427), Hepatic_adenoma (668), MODY (1020)                                        |
| 6928 | TCF2     | Grey                       | 3 | 27 | 2 | Diabetes_mellitus (427), Glomerulocystic_kidney_disease_hypoplastic (594), MODY (1020)             |
| 6948 | TCN2     | Hematological              | 1 | 0  | 1 | Transcobalamin_II_deficiency (1516)                                                                |
| 6949 | TCOF1    | Developmental              | 1 | 0  | 1 | Treacher_Collins_mandibulofacial_dysostosis (1520)                                                 |
| 6955 | TRA@     | Cancer                     | 1 | 36 | 1 | Leukemia (886)                                                                                     |
| 6997 | TDGF1    | Neurological               | 1 | 0  | 1 | Forebrain_defects (547)                                                                            |
| 7007 | TECTA    | Ear,Nose,Throat            | 1 | 40 | 1 | Deafness (406)                                                                                     |
| 7010 | TEK      | Cardiovascular             | 1 | 1  | 1 | Venous_thrombosis (1557)                                                                           |
| 7012 | TERC     | Grey                       | 2 | 3  | 2 | Aplastic_anemia (133), Dyskeratosis (458)                                                          |
| 7015 | TERT     | Hematological              | 1 | 2  | 1 | Aplastic_anemia (133)                                                                              |
| 7018 | TF       | Hematological              | 2 | 1  | 1 | Atransferrinemia (165), Iron_overload/deficiency (824)                                             |
| 7021 | TFAP2B   | multiple                   | 1 | 0  | 1 | Char_syndrome (303)                                                                                |
| 7030 | TFE3     | Cancer                     | 1 | 6  | 1 | Renal_cell_carcinoma (1308)                                                                        |
| 7036 | TFR2     | Metabolic                  | 1 | 4  | 1 | Hemochromatosis (657)                                                                              |
| 7038 | TG       | Endocrine                  | 3 | 7  | 1 | Autoimmune_thyroid_disease (2174), Goiter (617), Hypothyroidism (787)                              |
| 7040 | TGFB1    | Skeletal                   | 1 | 0  | 1 | Camurati-Engelmann_disease (257)                                                                   |
| 7044 | LEFTY2   | Developmental              | 1 | 1  | 1 | Left-right_axis_malformations (874)                                                                |
| 7045 | TGFBI    | Ophthalmological           | 1 | 6  | 1 | Corneal_dystrophy (362)                                                                            |
| 7046 | TGFBR1   | Connective_tissue_disorder | 1 | 1  | 1 | Loeys-Dietz_syndrome (910)                                                                         |
| 7048 | TGFBR2   | Grey                       | 3 | 37 | 2 | Colon_cancer (346), Esophageal_cancer (508), Loeys-Dietz_syndrome (910)                            |
| 7050 | TGIF     | Developmental              | 1 | 4  | 1 | Holoprosencephaly (689)                                                                            |
| 7051 | TGM1     | Dermatological             | 3 | 8  | 1 | Ichthyosiform_erythroderma (793), Ichthyosis (794), Self-healing_collodion_baby (1373)             |
| 7054 | TH       | Neurological               | 1 | 0  | 1 | Segawa_syndrome (1370)                                                                             |
| 7056 | THBD     | Grey                       | 2 | 17 | 2 | Myocardial_infarction (1054), Thrombophilia (1497)                                                 |
| 7066 | THPO     | Hematological              | 1 | 1  | 1 | Thrombocythemia (1493)                                                                             |
| 7067 | THRA     | Cancer                     | 1 | 2  | 1 | Pituitary_ACTH-secreting_adenoma (1232)                                                            |
| 7068 | THRB     | Endocrine                  | 1 | 1  | 1 | Thyroid_hormone_resistance (3503)                                                                  |
| 7078 | TIMP3    | Ophthalmological           | 1 | 0  | 1 | Sorsby_fundus_dystrophy (1416)                                                                     |
| 7080 | TITF1    | Grey                       | 2 | 0  | 2 | Chorea_hereditary_benign (318), Choreoathetosis_hypothyroidism_and_respiratory_distress (320)      |
| 7084 | TK2      | Muscular                   | 1 | 0  | 1 | Mitochondrial_DNA_depletion_myopathy (3016)                                                        |
| 7086 | TKT      | Metabolic                  | 1 | 0  | 1 | Wernicke-Korsakoff_syndrome (1589)                                                                 |
| 7099 | TLR4     | Immunological              | 1 | 0  | 1 | Endotoxin_hyposensitiveness (481)                                                                  |

|      |          |                            |    |    |                                                                                                                                                                                                                                                                                                    |
|------|----------|----------------------------|----|----|----------------------------------------------------------------------------------------------------------------------------------------------------------------------------------------------------------------------------------------------------------------------------------------------------|
| 7100 | TLR5     | Immunological              | 1  | 0  | 1 Legionaire_disease (876)                                                                                                                                                                                                                                                                         |
| 7102 | TSPAN7   | Neurological               | 1  | 23 | 1 Mental_retardation (990)                                                                                                                                                                                                                                                                         |
| 7124 | TNF      | Grey                       | 5  | 25 | 3 Asthma (153), Dementia (412), Malaria (940), Migraine (1013), Sepsis (1378)                                                                                                                                                                                                                      |
| 7132 | TNFRSF1A | Immunological              | 1  | 0  | 1 Periodic_fever_familial (1206)                                                                                                                                                                                                                                                                   |
| 7134 | TNNC1    | Cardiovascular             | 1  | 24 | 1 Cardiomyopathy (268)                                                                                                                                                                                                                                                                             |
| 7136 | TNNI2    | Developmental              | 1  | 2  | 1 Arthrogryposis (146)                                                                                                                                                                                                                                                                             |
| 7137 | TNNI3    | Cardiovascular             | 1  | 24 | 1 Cardiomyopathy (268)                                                                                                                                                                                                                                                                             |
| 7138 | TNNT1    | Muscular                   | 1  | 3  | 1 Nemaline_myopathy (1078)                                                                                                                                                                                                                                                                         |
| 7139 | TNNT2    | Cardiovascular             | 1  | 24 | 1 Cardiomyopathy (268)                                                                                                                                                                                                                                                                             |
| 7140 | TNNT3    | Developmental              | 1  | 2  | 1 Arthrogryposis (146)                                                                                                                                                                                                                                                                             |
| 7148 | TNXB     | Connective_tissue_disorder | 1  | 8  | 1 Ehlers-Danlos_syndrome (470)                                                                                                                                                                                                                                                                     |
| 7150 | TOP1     | Metabolic                  | 1  | 1  | 1 DNA_topoisomerase (440)                                                                                                                                                                                                                                                                          |
| 7153 | TOP2A    | Metabolic                  | 1  | 1  | 1 DNA_topoisomerase (440)                                                                                                                                                                                                                                                                          |
| 7157 | TP53     | Cancer                     | 11 | 70 | 1 Adrenal_cortical_carcinoma (2054), Breast_cancer (228), Colon_cancer (346), Hepatic_adenoma (668), Histiocytoma (683), Li-Fraumeni_syndrome (898), Multiple_malignancy_syndrome (5037), Nasopharyngeal_carcinoma (1074), Osteosarcoma (1166), Pancreatic_cancer (1178), Thyroid_carcinoma (1503) |
| 7167 | TPI1     | Hematological              | 1  | 9  | 1 Hemolytic_anemia (660)                                                                                                                                                                                                                                                                           |
| 7168 | TPM1     | Cardiovascular             | 1  | 24 | 1 Cardiomyopathy (268)                                                                                                                                                                                                                                                                             |
| 7169 | TPM2     | Grey                       | 2  | 5  | 2 Arthrogryposis (146), Nemaline_myopathy (1078)                                                                                                                                                                                                                                                   |
| 7170 | TPM3     | Muscular                   | 1  | 3  | 1 Nemaline_myopathy (1078)                                                                                                                                                                                                                                                                         |
| 7172 | TPMT     | Metabolic                  | 1  | 0  | 1 6-mercaptopurine_sensitivity (12)                                                                                                                                                                                                                                                                |
| 7173 | TPO      | Endocrine                  | 4  | 2  | 1 Goiter (617), Hyperthyroidism (755), Thyroid_hormone_resistance (3503), Total_iodide_organification_defect (3512)                                                                                                                                                                                |
| 7201 | TRHR     | Endocrine                  | 1  | 0  | 1 Thyrotropin-releasing_hormone_deficiency (1505)                                                                                                                                                                                                                                                  |
| 7225 | TRPC6    | Renal                      | 1  | 2  | 1 Glomerulosclerosis (596)                                                                                                                                                                                                                                                                         |
| 7227 | TRPS1    | Developmental              | 1  | 0  | 1 Trichorhinophalangeal_syndrome (1524)                                                                                                                                                                                                                                                            |
| 7248 | TSC1     | Grey                       | 3  | 2  | 3 Focal_cortical_dysplasia_Taylor_balloon_cell_type (545), Lymphangi leiomyomatosis (920), Tuberous_sclerosis (1534)                                                                                                                                                                               |
| 7249 | TSC2     | Grey                       | 2  | 2  | 2 Lymphangi leiomyomatosis (920), Tuberous_sclerosis (1534)                                                                                                                                                                                                                                        |
| 7251 | TSG101   | Cancer                     | 1  | 18 | 1 Breast_cancer (228)                                                                                                                                                                                                                                                                              |
| 7252 | TSHB     | Endocrine                  | 1  | 6  | 1 Hypothyroidism (787)                                                                                                                                                                                                                                                                             |
| 7253 | TSHR     | Grey                       | 3  | 16 | 2 Hyperthyroidism (754), Hypothyroidism (787), Thyroid_carcinoma (1503)                                                                                                                                                                                                                            |
| 7259 | TSPYL1   | Unclassified               | 1  | 0  | 0 Sudden_infant_death_with_dysgenesis_of_the_testes_syndrome (1459)                                                                                                                                                                                                                                |
| 7273 | TTN      | Grey                       | 2  | 38 | 2 Cardiomyopathy (268), Muscular_dystrophy (1040)                                                                                                                                                                                                                                                  |
| 7274 | TTPA     | Neurological               | 1  | 4  | 1 Ataxia (154)                                                                                                                                                                                                                                                                                     |
| 7276 | TTR      | Grey                       | 4  | 5  | 2 Amyloid_neuropathy (102), Amyloidosis (103), Carpal_tunnel_syndrome_familial (275), Dystransthyretinemic_hyperthyroxinemia (463)                                                                                                                                                                 |
| 7287 | TULP1    | Ophthalmological           | 1  | 29 | 1 Retinitis_pigmentosa (1316)                                                                                                                                                                                                                                                                      |
| 7291 | TWIST1   | Developmental              | 1  | 1  | 1 Saethre-Chotzen_syndrome (1344)                                                                                                                                                                                                                                                                  |
| 7292 | TNFSF4   | Cardiovascular             | 1  | 9  | 1 Myocardial_infarction (1054)                                                                                                                                                                                                                                                                     |
| 7299 | TYR      | Grey                       | 2  | 5  | 2 Albinism (72), Waardenburg_syndrome (1574)                                                                                                                                                                                                                                                       |
| 7305 | TYROBP   | Bone                       | 1  | 1  | 1 Nasu-Hakola_disease (1075)                                                                                                                                                                                                                                                                       |
| 7306 | TYRP1    | Dermatological             | 1  | 2  | 1 Albinism (72)                                                                                                                                                                                                                                                                                    |
| 7337 | UBE3A    | Developmental              | 1  | 1  | 1 Angelman_syndrome (113)                                                                                                                                                                                                                                                                          |
| 7345 | UCHL1    | Neurological               | 1  | 10 | 1 Parkinson_disease (1192)                                                                                                                                                                                                                                                                         |
| 7350 | UCP1     | Nutritional                | 1  | 20 | 1 Obesity (1126)                                                                                                                                                                                                                                                                                   |
| 7351 | UCP2     | Nutritional                | 1  | 20 | 1 Obesity (1126)                                                                                                                                                                                                                                                                                   |
| 7352 | UCP3     | Nutritional                | 1  | 20 | 1 Obesity (1126)                                                                                                                                                                                                                                                                                   |

|      |         |                  |   |    |   |                                                                                                                                                 |
|------|---------|------------------|---|----|---|-------------------------------------------------------------------------------------------------------------------------------------------------|
| 7356 | SCGB1A1 | Respiratory      | 1 | 12 | 1 | Asthma (153)                                                                                                                                    |
| 7369 | UMOD    | Renal            | 2 | 0  | 1 | Hyperuricemic_nephropathy (759), Medullary_cystic_kidney_disease (969)                                                                          |
| 7372 | UMPS    | Metabolic        | 1 | 0  | 1 | Oroticaciduria (1149)                                                                                                                           |
| 7374 | UNG     | Immunological    | 1 | 5  | 1 | Immunodeficiency (802)                                                                                                                          |
| 7381 | UQCRB   | multiple         | 1 | 6  | 1 | Mitochondrial_complex_deficiency (1016)                                                                                                         |
| 7389 | UROD    | Metabolic        | 1 | 5  | 1 | Porphyria (1249)                                                                                                                                |
| 7390 | UROS    | Metabolic        | 1 | 5  | 1 | Porphyria (1249)                                                                                                                                |
| 7391 | USF1    | Metabolic        | 1 | 0  | 1 | Hyperlipidemia (736)                                                                                                                            |
| 7399 | USH2A   | Grey             | 2 | 36 | 2 | Retinitis_pigmentosa (1316), Usher_syndrome (1551)                                                                                              |
| 7401 | USH3A   | multiple         | 1 | 7  | 1 | Usher_syndrome (1551)                                                                                                                           |
| 7415 | VCP     | Muscular         | 1 | 2  | 1 | Inclusion_body_myopathy (805)                                                                                                                   |
| 7421 | VDR     | Bone             | 1 | 1  | 1 | Rickets (1330)                                                                                                                                  |
| 7422 | VEGF    | Endocrine        | 1 | 26 | 1 | Diabetes_mellitus (427)                                                                                                                         |
| 7428 | VHL     | Grey             | 5 | 10 | 2 | Hemangioblastoma_cerebellar (650), Pheochromocytoma (1218), Polycythemia (1242), Renal_cell_carcinoma (1308), von_Hippel-Lindau_syndrome (1572) |
| 7436 | VLDLR   | Neurological     | 1 | 0  | 1 | Cerebellar_hypoplasia_VLDLR-associated (4289)                                                                                                   |
| 7439 | VMD2    | Ophthalmological | 3 | 4  | 1 | Macular_dystrophy (2937), Maculopathy_bull's-eye (938), Vitelliform_macular_dystrophy (1566)                                                    |
| 7450 | VWF     | Hematological    | 1 | 0  | 1 | von_Willebrand_disease (3572)                                                                                                                   |
| 7454 | WAS     | Grey             | 3 | 6  | 2 | Neutropenia (1101), Thrombocytopenia (1494), Wiskott-Aldrich_syndrome (1598)                                                                    |
| 7466 | WFS1    | Grey             | 2 | 0  | 2 | Hearing_loss_low-frequency_sensorineural (646), Wolfram_syndrome (1603)                                                                         |
| 7473 | WNT3    | multiple         | 1 | 0  | 1 | Tetra-amelia_autosomal_recessive (1482)                                                                                                         |
| 7486 | WRN     | multiple         | 1 | 0  | 1 | Werner_syndrome (1588)                                                                                                                          |
| 7490 | WT1     | Grey             | 5 | 3  | 3 | Denys-Drash_syndrome (420), Frasier_syndrome (552), Mesangial_sclerosis (993), WAGR_syndrome (1576), Wilms_tumor (1595)                         |
| 7494 | XBP1    | Psychiatric      | 1 | 0  | 1 | Bipolar_disorder (204)                                                                                                                          |
| 7498 | XDH     | Metabolic        | 1 | 0  | 1 | Xanthinuria_type_I (1607)                                                                                                                       |
| 7499 | XG      | Hematological    | 1 | 22 | 1 | Blood_group (212)                                                                                                                               |
| 7503 | XIST    | Unclassified     | 1 | 0  | 0 | X-inactivation_familial_skewed (1610)                                                                                                           |
| 7504 | XK      | Hematological    | 1 | 0  | 1 | McLeod_syndrome (965)                                                                                                                           |
| 7507 | XPA     | Dermatological   | 1 | 7  | 1 | Xeroderma_pigmentosum (1608)                                                                                                                    |
| 7508 | XPC     | Dermatological   | 1 | 7  | 1 | Xeroderma_pigmentosum (1608)                                                                                                                    |
| 7512 | XPNPEP2 | Immunological    | 1 | 1  | 1 | Angioedema (114)                                                                                                                                |
| 7517 | XRCC3   | Cancer           | 2 | 22 | 1 | Breast_cancer (228), Melanoma (978)                                                                                                             |
| 7531 | YWHAE   | multiple         | 1 | 0  | 1 | Miller-Dieker_lissencephaly (1014)                                                                                                              |
| 7535 | ZAP70   | Immunological    | 1 | 0  | 1 | Selective_T-cell_defect (1372)                                                                                                                  |
| 7546 | ZIC2    | Developmental    | 1 | 4  | 1 | Holoprosencephaly (689)                                                                                                                         |
| 7547 | ZIC3    | multiple         | 1 | 1  | 1 | Heterotaxy (675)                                                                                                                                |
| 7555 | ZNF9    | Muscular         | 1 | 1  | 1 | Myotonic_dystrophy (1063)                                                                                                                       |
| 7592 | ZNF41   | Neurological     | 1 | 23 | 1 | Mental_retardation (990)                                                                                                                        |
| 7704 | ZBTB16  | Cancer           | 1 | 36 | 1 | Leukemia (886)                                                                                                                                  |
| 7750 | ZNF198  | Cancer           | 1 | 0  | 1 | Stem-cell_leukemia/lymphoma_syndrome (1445)                                                                                                     |
| 7809 | BSND    | multiple         | 1 | 4  | 1 | Bartter_syndrome (187)                                                                                                                          |
| 7827 | NPHS2   | Renal            | 1 | 1  | 1 | Nephrotic_syndrome (1087)                                                                                                                       |
| 7840 | ALMS1   | Neurological     | 1 | 0  | 1 | (null) (95)                                                                                                                                     |
| 7841 | GCS1    | Metabolic        | 1 | 0  | 1 | Glucosidase_I_deficiency (601)                                                                                                                  |
| 7849 | PAX8    | Endocrine        | 1 | 6  | 1 | Hypothyroidism (787)                                                                                                                            |
| 7852 | CXCR4   | Immunological    | 2 | 0  | 1 | Myelokathexis_isolated (1049), WHIM_syndrome (1591)                                                                                             |
| 7873 | ARMET   | Cancer           | 1 | 8  | 1 | Pancreatic_cancer (1178)                                                                                                                        |
| 7879 | RAB7    | Neurological     | 1 | 17 | 1 | Charcot-Marie-Tooth_disease (301)                                                                                                               |
| 7915 | ALDH5A1 | Metabolic        | 1 | 0  | 1 | Succinic_semialdehyde_dehydrogenase_deficiency (1457)                                                                                           |

|      |        |                            |   |    |   |                                                                                                                                                                   |
|------|--------|----------------------------|---|----|---|-------------------------------------------------------------------------------------------------------------------------------------------------------------------|
| 7941 | PLA2G7 | Grey                       | 3 | 19 | 3 | Asthma (153), Atopy (164), Platelet_defect/deficiency (1237)                                                                                                      |
| 7957 | EPM2A  | Neurological               | 1 | 16 | 1 | Epilepsy (495)                                                                                                                                                    |
| 8013 | NR4A3  | Cancer                     | 1 | 2  | 1 | Chondrosarcoma (316)                                                                                                                                              |
| 8021 | NUP214 | Cancer                     | 1 | 36 | 1 | Leukemia (886)                                                                                                                                                    |
| 8022 | LHX3   | Endocrine                  | 1 | 3  | 1 | Pituitary_hormone_deficiency (5232)                                                                                                                               |
| 8028 | MLLT10 | Cancer                     | 1 | 36 | 1 | Leukemia (886)                                                                                                                                                    |
| 8029 | CUBN   | Hematological              | 1 | 1  | 1 | Megaloblastic_anemia (975)                                                                                                                                        |
| 8031 | NCOA4  | Cancer                     | 1 | 10 | 1 | Thyroid_carcinoma (1503)                                                                                                                                          |
| 8048 | CSRP3  | Cardiovascular             | 1 | 24 | 1 | Cardiomyopathy (268)                                                                                                                                              |
| 8050 | PDHX   | Metabolic                  | 1 | 0  | 1 | Lacticacidemia_due_to_PDX1_deficiency (859)                                                                                                                       |
| 8074 | FGF23  | Bone                       | 2 | 1  | 1 | Calcinosis_tumoral (254), Hypophosphatemic_rickets (784)                                                                                                          |
| 8086 | AAAS   | multiple                   | 1 | 0  | 1 | Achalasia-addisonianism-alacrimia_syndrome (24)                                                                                                                   |
| 8091 | HMGA2  | Cancer                     | 3 | 2  | 1 | Lipoma (904), Salivary_adenoma (1345), Uterine_leiomyoma (1552)                                                                                                   |
| 8106 | PABPN1 | Muscular                   | 1 | 0  | 1 | Oculopharyngeal_muscular_dystrophy (1135)                                                                                                                         |
| 8132 | PKDTS  | Renal                      | 1 | 3  | 1 | Polycystic_kidney_disease (1241)                                                                                                                                  |
| 8139 | GAN    | Neurological               | 1 | 0  | 1 | Giant_axonal_neuropathy (582)                                                                                                                                     |
| 8144 | FIMG1  | Muscular                   | 1 | 0  | 1 | Myasthenia (1041)                                                                                                                                                 |
| 8195 | MKKS   | Grey                       | 2 | 7  | 2 | Bardet-Biedl_syndrome (183), McKusick-Kaufman_syndrome (964)                                                                                                      |
| 8200 | GDF5   | Skeletal                   | 4 | 5  | 1 | Acromesomelic_dysplasia (39), Brachydactyly (224), Chondrodysplasia_Grebe_type (2315), Fibular_hypoplasia_and_complex_brachydactyly (539)                         |
| 8242 | SMCX   | Neurological               | 1 | 23 | 1 | Mental_retardation (990)                                                                                                                                          |
| 8287 | USP9Y  | Endocrine                  | 1 | 1  | 1 | Azoospermia (178)                                                                                                                                                 |
| 8288 | EPX    | Hematological              | 1 | 0  | 1 | Eosinophil_peroxidase_deficiency (491)                                                                                                                            |
| 8291 | DYSF   | Muscular                   | 3 | 25 | 1 | Miyoshi_myopathy (1018), Muscular_dystrophy (1040), Myopathy (1059)                                                                                               |
| 8292 | COLQ   | Neurological               | 1 | 0  | 1 | Endplate_acetylcholinesterase_deficiency (482)                                                                                                                    |
| 8301 | PICALM | Cancer                     | 1 | 36 | 1 | Leukemia (886)                                                                                                                                                    |
| 8312 | AXIN1  | Cancer                     | 1 | 7  | 1 | Hepatic_adenoma (668)                                                                                                                                             |
| 8313 | AXIN2  | Cancer                     | 2 | 33 | 1 | Colon_cancer (346), Oligodontia-colorectal_cancer_syndrome (1140)                                                                                                 |
| 8322 | FZD4   | Ophthalmological           | 1 | 2  | 1 | Exudative_vitreoretinopathy (515)                                                                                                                                 |
| 8379 | MAD1L1 | Cancer                     | 2 | 20 | 1 | Lymphoma (925), Prostate_cancer (1272)                                                                                                                            |
| 8419 | BFSP2  | Ophthalmological           | 1 | 14 | 1 | Cataract (277)                                                                                                                                                    |
| 8431 | NR0B2  | Nutritional                | 1 | 20 | 1 | Obesity (1126)                                                                                                                                                    |
| 8438 | RAD54L | Cancer                     | 3 | 54 | 1 | Breast_cancer (228), Colon_cancer (346), Lymphoma (925)                                                                                                           |
| 8443 | GNPAT  | Connective_tissue_disorder | 1 | 2  | 1 | Chondrodysplasia_punctata (315)                                                                                                                                   |
| 8456 | FOXN1  | Immunological              | 1 | 0  | 1 | T-cell_immunodeficiency,_congenital_alopecia,_and_nail_dystrophy (3478)                                                                                           |
| 8481 | OFD1   | Skeletal                   | 1 | 0  | 1 | Oral-facial-digital_syndrome (1145)                                                                                                                               |
| 8483 | CILP   | Skeletal                   | 1 | 0  | 1 | Lumbar_disc_disease (917)                                                                                                                                         |
| 8492 | PRSS12 | Neurological               | 1 | 23 | 1 | Mental_retardation (990)                                                                                                                                          |
| 8493 | PPM1D  | Cancer                     | 1 | 18 | 1 | Breast_cancer (228)                                                                                                                                               |
| 8504 | PEX3   | multiple                   | 1 | 10 | 1 | Zellweger_syndrome (1615)                                                                                                                                         |
| 8517 | IKBKG  | Dermatological             | 2 | 7  | 1 | Ectodermal_dysplasia (466), Incontinentia_pigmenti (806)                                                                                                          |
| 8518 | IKBKAP | Neurological               | 1 | 0  | 1 | Dysautonomia (454)                                                                                                                                                |
| 8540 | AGPS   | multiple                   | 1 | 1  | 1 | Rhizomelic_chondrodysplasia_punctata (1325)                                                                                                                       |
| 8546 | AP3B1  | multiple                   | 1 | 6  | 1 | Hermansky-Pudlak_syndrome (670)                                                                                                                                   |
| 8557 | TCAP   | Grey                       | 2 | 38 | 2 | Cardiomyopathy (268), Muscular_dystrophy (1040)                                                                                                                   |
| 8572 | PDLIM4 | Bone                       | 1 | 0  | 1 | Osteoporosis (1165)                                                                                                                                               |
| 8625 | RFXANK | Immunological              | 1 | 0  | 1 | MHC_class_II_deficiency (1006)                                                                                                                                    |
| 8626 | TP73L  | Grey                       | 6 | 1  | 2 | ADULT_syndrome (59), EEC_syndrome (468), Hay-Wells_syndrome (643), Limb-mammary_syndrome (901), Rapp-Hodgkin_syndrome (1305), Split-hand/foot_malformation (1430) |

|      |           |                            |   |    |   |                                                                                                                                                             |
|------|-----------|----------------------------|---|----|---|-------------------------------------------------------------------------------------------------------------------------------------------------------------|
| 8629 | JRK       | Neurological               | 1 | 16 | 1 | Epilepsy (495)                                                                                                                                              |
| 8643 | PTCH2     | Cancer                     | 2 | 4  | 1 | Basal_cell_carcinoma (188), Medulloblastoma (970)                                                                                                           |
| 8647 | ABCB11    | Gastrointestinal           | 1 | 3  | 1 | Cholestasis (310)                                                                                                                                           |
| 8659 | ALDH4A1   | Metabolic                  | 1 | 1  | 1 | Hyperprolinemia (749)                                                                                                                                       |
| 8660 | IRS2      | Endocrine                  | 1 | 26 | 1 | Diabetes_mellitus (427)                                                                                                                                     |
| 8671 | SLC4A4    | Renal                      | 1 | 4  | 1 | Renal_tubular_acidosis (7308)                                                                                                                               |
| 8701 | DNAH11    | Grey                       | 2 | 3  | 2 | Kartagener_syndrome (840), Situs_ambiguus (1399)                                                                                                            |
| 8706 | B3GALT3   | Hematological              | 1 | 22 | 1 | Blood_group (212)                                                                                                                                           |
| 8787 | RGS9      | Ophthalmological           | 1 | 1  | 1 | Bradyopsia (225)                                                                                                                                            |
| 8792 | TNFRSF11A | Bone                       | 2 | 3  | 1 | Osteolysis (1157), Paget_disease (1173)                                                                                                                     |
| 8795 | TNFRSF10B | Cancer                     | 1 | 2  | 1 | Squamous_cell_carcinoma (1437)                                                                                                                              |
| 8803 | SUCLA2    | multiple                   | 1 | 1  | 1 | Mitochondrial_DNA_depletion_syndrome (5016)                                                                                                                 |
| 8805 | TRIM24    | Cancer                     | 1 | 10 | 1 | Thyroid_carcinoma (1503)                                                                                                                                    |
| 8813 | DPM1      | Metabolic                  | 1 | 12 | 1 | Congenital_disorder_of_glycosylation (354)                                                                                                                  |
| 8820 | HESX1     | Grey                       | 2 | 3  | 2 | Pituitary_hormone_deficiency (5232), Septooptic_dysplasia (1380)                                                                                            |
| 8833 | GMPS      | Cancer                     | 1 | 36 | 1 | Leukemia (886)                                                                                                                                              |
| 8838 | WISP3     | Grey                       | 2 | 4  | 2 | Arthropathy (147), Spondyloepiphyseal_dysplasia (1435)                                                                                                      |
| 8842 | PROM1     | Ophthalmological           | 1 | 3  | 1 | Retinal_cone_dystrophy (1315)                                                                                                                               |
| 8864 | PER2      | Neurological               | 1 | 0  | 1 | Advanced_sleep_phase_syndrome (60)                                                                                                                          |
| 8869 | ST3GAL5   | Neurological               | 1 | 0  | 1 | Amish_infantile_epilepsy_syndrome (100)                                                                                                                     |
| 8878 | SQSTM1    | Bone                       | 1 | 2  | 1 | Paget_disease (1173)                                                                                                                                        |
| 8890 | EIF2B4    | Neurological               | 2 | 4  | 1 | Leukoencephalopathy_with_vanishing_white_matter (891), Ovarioleukodystrophy (1171)                                                                          |
| 8891 | EIF2B3    | Neurological               | 1 | 4  | 1 | Leukoencephalopathy_with_vanishing_white_matter (891)                                                                                                       |
| 8892 | EIF2B2    | Neurological               | 2 | 4  | 1 | Leukoencephalopathy_with_vanishing_white_matter (891), Ovarioleukodystrophy (1171)                                                                          |
| 8893 | EIF2B5    | Neurological               | 2 | 4  | 1 | Leukoencephalopathy_with_vanishing_white_matter (891), Ovarioleukodystrophy (1171)                                                                          |
| 8898 | MTMR2     | Neurological               | 1 | 17 | 1 | Charcot-Marie-Tooth_disease (301)                                                                                                                           |
| 8910 | SGCE      | Neurological               | 1 | 5  | 1 | Dystonia (462)                                                                                                                                              |
| 8915 | BCL10     | Cancer                     | 5 | 40 | 1 | Colon_cancer (346), Germ_cell_tumor (580), Lymphoma (925), Mesothelioma (995), Sezary_syndrome (1385)                                                       |
| 8929 | PHOX2B    | Grey                       | 3 | 8  | 3 | Central_hypoventilation_syndrome (287), Hirschsprung_disease (681), Neuroblastoma (1091)                                                                    |
| 9051 | PSTPIP1   | Dermatological             | 1 | 0  | 1 | Pyogenic_sterile_arthritis_pyoderma_gangrenosum_and_acne (1295)                                                                                             |
| 9056 | SLC7A7    | Metabolic                  | 1 | 0  | 1 | Lysinuric_protein_intolerance (931)                                                                                                                         |
| 9060 | PAPSS2    | Connective_tissue_disorder | 1 | 0  | 1 | SEMD_Pakistani_type (1374)                                                                                                                                  |
| 9076 | CLDN1     | multiple                   | 1 | 0  | 1 | Neonatal_ichthyosis-sclerosing_cholangitis_syndrome (3079)                                                                                                  |
| 9095 | TBX19     | Endocrine                  | 1 | 0  | 1 | Adrenocorticotrophic_hormone_deficiency (55)                                                                                                                |
| 9129 | PRPF3     | Ophthalmological           | 1 | 29 | 1 | Retinitis_pigmentosa (1316)                                                                                                                                 |
| 9132 | KCNQ4     | Ear,Nose,Throat            | 1 | 40 | 1 | Deafness (406)                                                                                                                                              |
| 9150 | CTDP1     | Ophthalmological           | 1 | 0  | 1 | Congenital_cataracts (4354)                                                                                                                                 |
| 9210 | BMP15     | Endocrine                  | 1 | 1  | 1 | Ovarian_dysgenesis (3171)                                                                                                                                   |
| 9211 | LG11      | Grey                       | 2 | 20 | 2 | Epilepsy (495), Glioblastoma (590)                                                                                                                          |
| 9215 | LARGE     | Muscular                   | 1 | 17 | 1 | Muscular_dystrophy (1040)                                                                                                                                   |
| 9217 | VAPB      | Grey                       | 2 | 11 | 2 | Amyotrophic_lateral_sclerosis (104), Spinal_muscular_atrophy (1426)                                                                                         |
| 9227 | LRAT      | Ophthalmological           | 1 | 3  | 1 | Retinal_cone_dystrophy (1315)                                                                                                                               |
| 9231 | DLG5      | Gastrointestinal           | 1 | 1  | 1 | Crohn_disease (390)                                                                                                                                         |
| 9241 | NOG       | Grey                       | 4 | 0  | 2 | Stapes_ankylosis_syndrome_without_symphalangism (1438), Symphalangism,_proximal (1467), Synostoses_syndrome (1469), Tarsal-carpal_coalition_syndrome (1475) |
| 9244 | CRLF1     | multiple                   | 1 | 0  | 1 | Cold-induced_sweating_syndrome (2344)                                                                                                                       |
| 9247 | GCM2      | Endocrine                  | 1 | 1  | 1 | Hypoparathyroidism (779)                                                                                                                                    |
| 9289 | GPR56     | Neurological               | 1 | 0  | 1 | Polymicrogyria (1244)                                                                                                                                       |
| 9342 | SNAP29    | Neurological               | 1 | 0  | 1 | Cerebral_dysgenesis,_neuropathy,_ichthyosis,_and_palmoplantar_keratoderma_syndrome (6291)                                                                   |

|       |          |                            |   |    |   |                                                                                        |
|-------|----------|----------------------------|---|----|---|----------------------------------------------------------------------------------------|
| 9365  | KL       | Cardiovascular             | 1 | 5  | 1 | Coronary_artery_disease (365)                                                          |
| 9370  | ADIPOQ   | Endocrine                  | 1 | 0  | 1 | Adiponectin_deficiency (52)                                                            |
| 9380  | GRHPR    | Metabolic                  | 1 | 1  | 1 | Hyperoxaluria (742)                                                                    |
| 9381  | OTOF     | Ear,Nose,Throat            | 1 | 40 | 1 | Deafness (406)                                                                         |
| 9401  | RECQL4   | multiple                   | 2 | 0  | 1 | RAPADILINO_syndrome (1303), Rothmund-Thomson_syndrome (1338)                           |
| 9409  | PEX16    | multiple                   | 1 | 10 | 1 | Zellweger_syndrome (1615)                                                              |
| 9414  | TJP2     | Gastrointestinal           | 1 | 2  | 1 | Hypercholanemia (723)                                                                  |
| 9420  | CYP7B1   | Gastrointestinal           | 1 | 0  | 1 | Giant_cell_hepatitis (2584)                                                            |
| 9445  | ITM2B    | Neurological               | 1 | 5  | 1 | Dementia (412)                                                                         |
| 9451  | EIF2AK3  | Bone                       | 1 | 0  | 1 | Wolcott-Rallison_syndrome (1600)                                                       |
| 9459  | ARHGEF6  | Neurological               | 1 | 23 | 1 | Mental_retardation (990)                                                               |
| 9469  | CHST3    | Skeletal                   | 1 | 4  | 1 | Spondyloepiphyseal_dysplasia (1435)                                                    |
| 9479  | MAPK8IP1 | Endocrine                  | 1 | 26 | 1 | Diabetes_mellitus (427)                                                                |
| 9496  | TBX4     | Skeletal                   | 1 | 0  | 1 | Small_patella_syndrome (1406)                                                          |
| 9499  | MYOT     | Muscular                   | 2 | 17 | 1 | Muscular_dystrophy (1040), Myotilinopathy (1061)                                       |
| 9509  | ADAMTS2  | Connective_tissue_disorder | 1 | 8  | 1 | Ehlers-Danlos_syndrome (470)                                                           |
| 9516  | LITAF    | Neurological               | 1 | 17 | 1 | Charcot-Marie-Tooth_disease (301)                                                      |
| 9526  | MPDU1    | Metabolic                  | 1 | 12 | 1 | Congenital_disorder_of_glycosylation (354)                                             |
| 9562  | MINPP1   | Cancer                     | 1 | 10 | 1 | Thyroid_carcinoma (1503)                                                               |
| 9563  | H6PD     | Metabolic                  | 1 | 1  | 1 | Cortisone_reductase_deficiency (368)                                                   |
| 9568  | GPR51    | Psychiatric                | 1 | 2  | 1 | Nicotine_addiction (1106)                                                              |
| 9607  | CART     | Nutritional                | 1 | 20 | 1 | Obesity (1126)                                                                         |
| 9622  | KLK4     | Bone                       | 1 | 3  | 1 | Amelogenesis_imperfecta (99)                                                           |
| 9627  | SNCAIP   | Neurological               | 1 | 10 | 1 | Parkinson_disease (1192)                                                               |
| 9639  | ARHGEF10 | Neurological               | 1 | 0  | 1 | Slowed_nerve_conduction_velocity,_AD (1404)                                            |
| 9657  | IQCB1    | Renal                      | 1 | 2  | 1 | Senior-Loken_syndrome (1375)                                                           |
| 9685  | ENTH     | Psychiatric                | 1 | 8  | 1 | Schizophrenia (1359)                                                                   |
| 9820  | CUL7     | multiple                   | 1 | 0  | 1 | 3-M_syndrome (10)                                                                      |
| 9821  | RB1CC1   | Cancer                     | 1 | 18 | 1 | Breast_cancer (228)                                                                    |
| 9839  | ZFHX1B   | Developmental              | 1 | 0  | 1 | Mowat-Wilson_syndrome (1028)                                                           |
| 9856  | KIAA0319 | Psychiatric                | 1 | 1  | 1 | Dyslexia (459)                                                                         |
| 9927  | MFN2     | Neurological               | 1 | 17 | 1 | Charcot-Marie-Tooth_disease (301)                                                      |
| 9950  | GOLGA5   | Cancer                     | 1 | 10 | 1 | Thyroid_carcinoma (1503)                                                               |
| 9990  | SLC12A6  | Neurological               | 1 | 0  | 1 | Agenesis_of_the_corpus_callosum_with_peripheral_neuropathy (65)                        |
| 9992  | KCNE2    | Cardiovascular             | 2 | 9  | 1 | Atrial_fibrillation (166), Long_QT_syndrome (912)                                      |
| 9997  | SCO2     | Cardiovascular             | 1 | 0  | 1 | Cardioencephalomyopathy,_fatal_infantile,_due_to_cytochrome_c_oxidase_deficiency (267) |
| 10002 | NR2E3    | Ophthalmological           | 2 | 29 | 1 | Enhanced_S-cone_syndrome (483), Retinitis_pigmentosa (1316)                            |
| 10008 | KCNE3    | Renal                      | 1 | 2  | 1 | Hypokalemic_periodic_paralysis (776)                                                   |
| 10020 | GNE      | Grey                       | 3 | 2  | 2 | Inclusion_body_myopathy (805), Nonaka_myopathy (1112), Sialuria (1392)                 |
| 10060 | ABCC9    | Cardiovascular             | 1 | 24 | 1 | Cardiomyopathy (268)                                                                   |
| 10083 | USH1C    | Grey                       | 2 | 44 | 2 | Deafness (406), Usher_syndrome (1551)                                                  |
| 10084 | PQBP1    | Neurological               | 1 | 0  | 1 | Renpenning_syndrome (1309)                                                             |
| 10117 | ENAM     | Grey                       | 2 | 3  | 2 | Amelogenesis_imperfecta (99), Hypoplastic_enamel_pitting,_localized (785)              |
| 10128 | LRPPRC   | Neurological               | 1 | 11 | 1 | Leigh_syndrome (877)                                                                   |
| 10133 | OPTN     | Ophthalmological           | 1 | 3  | 1 | Glaucoma (589)                                                                         |
| 10157 | AASS     | Metabolic                  | 1 | 0  | 1 | Hyperlysinemia (738)                                                                   |
| 10165 | SLC25A13 | Metabolic                  | 1 | 1  | 1 | Citrullinemia (335)                                                                    |
| 10166 | SLC25A15 | Metabolic                  | 1 | 0  | 1 | Hyperornithinemia-hyperammonemia-homocitrullinemia_syndrome (740)                      |
| 10195 | ALG3     | Metabolic                  | 1 | 12 | 1 | Congenital_disorder_of_glycosylation (354)                                             |

|       |          |                            |   |    |   |                                                                                                 |
|-------|----------|----------------------------|---|----|---|-------------------------------------------------------------------------------------------------|
| 10216 | PRG4     | Skeletal                   | 1 | 0  | 1 | Camptodactyly-arthropathy-coxa_vara-pericarditis_syndrome (256)                                 |
| 10243 | GPHN     | Metabolic                  | 1 | 2  | 1 | Molybdenum_cofactor_deficiency (1023)                                                           |
| 10269 | ZMPSTE24 | Grey                       | 2 | 0  | 2 | Mandibuloacral_dysplasia_with_type_B_lipodystrophy (945), Restrictive_dermopathy,_lethal (1314) |
| 10312 | TCIRG1   | Bone                       | 1 | 3  | 1 | Osteopetrosis (1161)                                                                            |
| 10320 | ZNFN1A1  | Cancer                     | 1 | 36 | 1 | Leukemia (886)                                                                                  |
| 10395 | DLC1     | Cancer                     | 1 | 33 | 1 | Colon_cancer (346)                                                                              |
| 10397 | NDRG1    | Neurological               | 1 | 17 | 1 | Charcot-Marie-Tooth_disease (301)                                                               |
| 10461 | MERTK    | Ophthalmological           | 1 | 29 | 1 | Retinitis_pigmentosa (1316)                                                                     |
| 10516 | FBLN5    | Grey                       | 2 | 6  | 2 | Cutis_laxa (395), Macular_degeneration (937)                                                    |
| 10555 | AGPAT2   | Metabolic                  | 1 | 4  | 1 | Lipodystrophy (902)                                                                             |
| 10558 | SPTLC1   | Neurological               | 1 | 7  | 1 | Neuropathy (1099)                                                                               |
| 10560 | SLC19A2  | Hematological              | 1 | 0  | 1 | Thiamine-responsive_megaloblastic_anemia_syndrome (1491)                                        |
| 10564 | ARFGEF2  | Neurological               | 1 | 0  | 1 | Periventricular_heterotopia_with_microcephaly (1209)                                            |
| 10577 | NPC2     | Metabolic                  | 1 | 2  | 1 | Niemann-Pick_disease (1107)                                                                     |
| 10585 | POMT1    | Grey                       | 2 | 18 | 2 | Muscular_dystrophy (1040), Walker-Warburg_syndrome (1578)                                       |
| 10594 | PRPF8    | Ophthalmological           | 1 | 29 | 1 | Retinitis_pigmentosa (1316)                                                                     |
| 10682 | EBP      | Connective_tissue_disorder | 1 | 2  | 1 | Chondrodysplasia_punctata (315)                                                                 |
| 10683 | DLL3     | Skeletal                   | 1 | 1  | 1 | Spondylocostal_dysostosis (1433)                                                                |
| 10686 | CLDN16   | Renal                      | 1 | 2  | 1 | Hypomagnesemia (778)                                                                            |
| 10743 | RAI1     | multiple                   | 1 | 0  | 1 | Smith-Magenis_syndrome (1411)                                                                   |
| 10747 | MASP2    | Immunological              | 1 | 0  | 1 | MASP2_deficiency (956)                                                                          |
| 10804 | GJB6     | Grey                       | 2 | 47 | 2 | Deafness (406), Ectodermal_dysplasia (466)                                                      |
| 10841 | FTCD     | Metabolic                  | 1 | 0  | 1 | Glutamate_formiminotransferase_deficiency (602)                                                 |
| 10842 | C7orf16  | Metabolic                  | 1 | 7  | 1 | Hypercholesterolemia (724)                                                                      |
| 10891 | PPARGC1A | Metabolic                  | 1 | 4  | 1 | Lipodystrophy (902)                                                                             |
| 10892 | MALT1    | Cancer                     | 1 | 0  | 1 | MALT_lymphoma (944)                                                                             |
| 10913 | EDAR     | Dermatological             | 1 | 7  | 1 | Ectodermal_dysplasia (466)                                                                      |
| 10962 | MLLT11   | Cancer                     | 1 | 36 | 1 | Leukemia (886)                                                                                  |
| 10984 | KCNQ1OT1 | multiple                   | 1 | 3  | 1 | Beckwith-Wiedemann_syndrome (194)                                                               |
| 11005 | SPINK5   | Grey                       | 2 | 4  | 2 | Atopy (164), Netherton_syndrome (1088)                                                          |
| 11081 | KERA     | Ophthalmological           | 1 | 6  | 1 | Corneal_dystrophy (362)                                                                         |
| 11093 | ADAMTS13 | Hematological              | 1 | 8  | 1 | Thrombophilia (1497)                                                                            |
| 11132 | CAPN10   | Endocrine                  | 1 | 26 | 1 | Diabetes_mellitus (427)                                                                         |
| 11136 | SLC7A9   | Renal                      | 1 | 1  | 1 | Cystinuria (401)                                                                                |
| 11141 | IL1RAPL1 | Neurological               | 1 | 23 | 1 | Mental_retardation (990)                                                                        |
| 11146 | GLMN     | Cardiovascular             | 1 | 0  | 1 | Glomuvenous_malformations (597)                                                                 |
| 11178 | LZTS1    | Cancer                     | 1 | 3  | 1 | Esophageal_cancer (508)                                                                         |
| 11200 | CHEK2    | Cancer                     | 4 | 27 | 1 | Breast_cancer (228), Li-Fraumeni_syndrome (898), Osteosarcoma (1166), Prostate_cancer (1272)    |
| 11216 | AKAP10   | Developmental              | 1 | 1  | 1 | Longevity (911)                                                                                 |
| 11231 | SEC63    | Gastrointestinal           | 1 | 1  | 1 | Polycystic_liver_disease (3241)                                                                 |
| 11234 | HPS5     | multiple                   | 1 | 6  | 1 | Hermansky-Pudlak_syndrome (670)                                                                 |
| 11235 | PDCD10   | Neurological               | 1 | 2  | 1 | Cerebral_cavernous_malformations (4291)                                                         |
| 11236 | RNF139   | Cancer                     | 1 | 6  | 1 | Renal_cell_carcinoma (1308)                                                                     |
| 11254 | SLC6A14  | Nutritional                | 1 | 20 | 1 | Obesity (1126)                                                                                  |
| 11281 | POU6F2   | Cancer                     | 1 | 3  | 1 | Wilms_tumor (1595)                                                                              |
| 11285 | B4GALT7  | Connective_tissue_disorder | 1 | 8  | 1 | Ehlers-Danlos_syndrome (470)                                                                    |
| 11315 | PARK7    | Neurological               | 1 | 10 | 1 | Parkinson_disease (1192)                                                                        |
| 11322 | EVER1    | Dermatological             | 1 | 1  | 1 | Epidermodysplasia_verruciformis (492)                                                           |



|       |           |                            |   |    |   |                                                                                                                  |
|-------|-----------|----------------------------|---|----|---|------------------------------------------------------------------------------------------------------------------|
| 22800 | RRAS2     | Cancer                     | 1 | 7  | 1 | Ovarian_cancer (1170)                                                                                            |
| 22891 | ZNF365    | Renal                      | 1 | 1  | 1 | Nephrolithiasis (1081)                                                                                           |
| 22930 | RAB3GAP1  | multiple                   | 1 | 2  | 1 | Walker-Warburg_syndrome (1578)                                                                                   |
| 22934 | RPIA      | Metabolic                  | 1 | 0  | 1 | Ribose_5-phosphate_isomerase_deficiency (1329)                                                                   |
| 22954 | TRIM32    | Muscular                   | 1 | 17 | 1 | Muscular_dystrophy (1040)                                                                                        |
| 22976 | PAXIP1    | Neurological               | 1 | 11 | 1 | Alzheimer_disease (98)                                                                                           |
| 23064 | ALS4      | Neurological               | 1 | 4  | 1 | Ataxia (154)                                                                                                     |
| 23092 | ARHGAP26  | Cancer                     | 1 | 36 | 1 | Leukemia (886)                                                                                                   |
| 23095 | KIF1B     | Neurological               | 1 | 17 | 1 | Charcot-Marie-Tooth_disease (301)                                                                                |
| 23111 | SPG20     | Neurological               | 1 | 0  | 1 | Troyer_syndrome (1530)                                                                                           |
| 23209 | MLC1      | Neurological               | 1 | 0  | 1 | Megalencephalic_leukoencephalopathy_with_subcortical_cysts (974)                                                 |
| 23230 | VPS13A    | Neurological               | 1 | 0  | 1 | Choreoacanthocytosis (319)                                                                                       |
| 23305 | ACSL6     | Grey                       | 2 | 4  | 2 | Myelodysplastic_syndrome (1045), Myelogenous_leukemia (1047)                                                     |
| 23365 | ARHGEF12  | Cancer                     | 1 | 36 | 1 | Leukemia (886)                                                                                                   |
| 23373 | MECT1     | Cancer                     | 1 | 1  | 1 | Mucoepidermoid_salivary_gland_carcinoma (1031)                                                                   |
| 23389 | THRAP2    | Developmental              | 1 | 1  | 1 | Transposition_of_great_arteries,_dextro-looped (1519)                                                            |
| 23414 | ZFPM2     | Cardiovascular             | 1 | 2  | 1 | Tetralogy_of_Fallot (1483)                                                                                       |
| 23417 | MLYCD     | Metabolic                  | 1 | 0  | 1 | Malonyl-CoA_decarboxylase_deficiency (943)                                                                       |
| 23418 | CRB1      | Ophthalmological           | 3 | 32 | 1 | Leber_congenital_amaurosis (873), Pigmented_paravenous_chorioretinal_atrophy (1229), Retinitis_pigmentosa (1316) |
| 23474 | ETHE1     | Metabolic                  | 1 | 0  | 1 | Ethylmalonic_encephalopathy (510)                                                                                |
| 23495 | TNFRSF13B | Immunological              | 1 | 0  | 1 | Immunoglobulin_A_deficiency (804)                                                                                |
| 23562 | CLDN14    | Ear,Nose,Throat            | 1 | 40 | 1 | Deafness (406)                                                                                                   |
| 23569 | PADI4     | Connective_tissue_disorder | 1 | 7  | 1 | Rheumatoid_arthritis (1324)                                                                                      |
| 23592 | LEMD3     | Grey                       | 3 | 0  | 3 | Buschke-Ollendorff_syndrome (238), Melorheostosis_with_osteopoikilosis (982), Osteopoikilosis (1162)             |
| 23600 | AMACR     | Metabolic                  | 1 | 0  | 1 | Alpha-methylacyl-CoA_racemase_deficiency (91)                                                                    |
| 23607 | CD2AP     | Renal                      | 1 | 2  | 1 | Glomerulosclerosis (596)                                                                                         |
| 23746 | AIPL1     | Ophthalmological           | 3 | 33 | 1 | Cone_dystrophy (352), Leber_congenital_amaurosis (873), Retinitis_pigmentosa (1316)                              |
| 24140 | FTSJ1     | Neurological               | 1 | 23 | 1 | Mental_retardation (990)                                                                                         |
| 25788 | RAD54B    | Cancer                     | 2 | 39 | 1 | Colon_cancer (346), Lymphoma (925)                                                                               |
| 25794 | FSCN2     | Ophthalmological           | 1 | 29 | 1 | Retinitis_pigmentosa (1316)                                                                                      |
| 25814 | ATXN10    | Neurological               | 1 | 12 | 1 | Spinocerebellar_ataxia (1428)                                                                                    |
| 25836 | NIPBL     | Developmental              | 1 | 0  | 1 | Cornelia_de_Lange_syndrome (364)                                                                                 |
| 25861 | DFNB31    | Ear,Nose,Throat            | 1 | 40 | 1 | Deafness (406)                                                                                                   |
| 25894 | PLEKHG4   | Neurological               | 1 | 12 | 1 | Spinocerebellar_ataxia (1428)                                                                                    |
| 25953 | MR-1      | Neurological               | 1 | 0  | 1 | Paroxysmal_kinesigenic_choreoathetosis (1195)                                                                    |
| 26012 | NELF      | Endocrine                  | 1 | 3  | 1 | Hypogonadotropic_hypogonadism (774)                                                                              |
| 26119 | LDLRAP1   | Metabolic                  | 1 | 7  | 1 | Hypercholesterolemia (724)                                                                                       |
| 26121 | PRPF31    | Ophthalmological           | 1 | 29 | 1 | Retinitis_pigmentosa (1316)                                                                                      |
| 26128 | KIAA1279  | multiple                   | 1 | 0  | 1 | Goldberg-Shprintzen_megacolon_syndrome (618)                                                                     |
| 26154 | ABCA12    | Dermatological             | 1 | 6  | 1 | Ichthyosis (794)                                                                                                 |
| 26191 | PTPN22    | Grey                       | 3 | 36 | 3 | Diabetes_mellitus (427), Rheumatoid_arthritis (1324), Systemic_lupus_erythematosus (1471)                        |
| 26227 | PHGDH     | Metabolic                  | 1 | 0  | 1 | Phosphoglycerate_dehydrogenase_deficiency (1220)                                                                 |
| 26276 | VPS33B    | Gastrointestinal           | 1 | 0  | 1 | ARC_syndrome (139)                                                                                               |
| 26278 | SACS      | Neurological               | 1 | 8  | 1 | Spastic_ataxia/paraplegia (1418)                                                                                 |
| 26353 | HSPB8     | Neurological               | 1 | 7  | 1 | Neuropathy (1099)                                                                                                |
| 26503 | SLC17A5   | Metabolic                  | 2 | 1  | 1 | Salla_disease (1346), Sialidosis (1391)                                                                          |
| 26511 | CHIC2     | Cancer                     | 1 | 36 | 1 | Leukemia (886)                                                                                                   |
| 26580 | BSCL2     | Grey                       | 3 | 10 | 3 | Lipodystrophy (902), Silver_spastic_paraplegia_syndrome (1396), Spinal_muscular_atrophy (1426)                   |

|       |           |                                |   |    |                                                                                                                                                                                      |
|-------|-----------|--------------------------------|---|----|--------------------------------------------------------------------------------------------------------------------------------------------------------------------------------------|
| 26762 | HAVCR1    | Immunological                  | 1 | 4  | 1 Atopy (164)                                                                                                                                                                        |
| 27019 | DNAI1     | Grey                           | 2 | 2  | 2 Ciliary_dyskinesia (331), Kartagener_syndrome (840)                                                                                                                                |
| 27030 | MLH3      | Cancer                         | 1 | 33 | 1 Colon_cancer (346)                                                                                                                                                                 |
| 27031 | NPHP3     | Renal                          | 1 | 3  | 1 Nephronophthisis (1082)                                                                                                                                                            |
| 27032 | ATP2C1    | Dermatological                 | 1 | 0  | 1 Hailey-Hailey_disease (633)                                                                                                                                                        |
| 27130 | INVS      | Renal                          | 1 | 3  | 1 Nephronophthisis (1082)                                                                                                                                                            |
| 27185 | DISC1     | Psychiatric                    | 1 | 8  | 1 Schizophrenia (1359)                                                                                                                                                               |
| 27232 | GNMT      | Metabolic                      | 1 | 3  | 1 Glycine_encephalopathy (608)                                                                                                                                                       |
| 28962 | OSTM1     | Bone                           | 1 | 3  | 1 Osteopetrosis (1161)                                                                                                                                                               |
| 29760 | BLNK      | Immunological                  | 1 | 0  | 1 Hypoglobulinemia_and_absent_B_cells (771)                                                                                                                                          |
| 29851 | ICOS      | Immunological                  | 1 | 0  | 1 ICOS_deficiency (795)                                                                                                                                                              |
| 29881 | NPC1L1    | Unclassified                   | 1 | 0  | 0 Ezetimibe,_nonresponse_to (517)                                                                                                                                                    |
| 29929 | ALG6      | Metabolic                      | 1 | 12 | 1 Congenital_disorder_of_glycosylation (354)                                                                                                                                         |
| 29958 | DMGDH     | Metabolic                      | 1 | 0  | 1 Dimethylglycine_dehydrogenase_deficiency (435)                                                                                                                                     |
| 30061 | SLC40A1   | Metabolic                      | 1 | 4  | 1 Hemochromatosis (657)                                                                                                                                                              |
| 30813 | VSX1      | Grey                           | 3 | 6  | 2 Corneal_dystrophy (362),<br>Craniofacial_anomalies,_empty_sella_turcica,_corneal_endothelial_changes,_and_abnormal_retinal_and_auditory_bi<br>polar_cells (377), Keratoconus (844) |
| 30835 | CD209     | Immunological                  | 1 | 0  | 1 Dengue_fever,_protection_against (413)                                                                                                                                             |
| 50485 | SMARCAL1  | Connective_tissue_di<br>sorder | 1 | 0  | 1 Schimke_immunoosseous_dysplasia (1354)                                                                                                                                             |
| 50506 | DUOX2     | Endocrine                      | 1 | 6  | 1 Hypothyroidism (787)                                                                                                                                                               |
| 50511 | SYCP3     | Endocrine                      | 1 | 1  | 1 Azoospermia (178)                                                                                                                                                                  |
| 50617 | ATP6V0A4  | Renal                          | 1 | 4  | 1 Renal_tubular_acidosis (7308)                                                                                                                                                      |
| 50814 | NSDHL     | Developmental                  | 1 | 0  | 1 CHILD_syndrome (306)                                                                                                                                                               |
| 50846 | DHH       | Endocrine                      | 1 | 1  | 1 Gonadal_dysgenesis (619)                                                                                                                                                           |
| 50943 | FOXP3     | Grey                           | 2 | 26 | 2 Diabetes_mellitus (427), Immunodysregulation,_polyendocrinopathy,_and_enteropathy,_X-linked (803)                                                                                  |
| 50945 | TBX22     | Developmental                  | 1 | 2  | 1 Cleft_palate (336)                                                                                                                                                                 |
| 50964 | SOST      | Skeletal                       | 1 | 0  | 1 Sclerosteosis (1363)                                                                                                                                                               |
| 51062 | SPG3A     | Neurological                   | 1 | 8  | 1 Spastic_ataxia/paraplegia (1418)                                                                                                                                                   |
| 51099 | ABHD5     | Metabolic                      | 1 | 0  | 1 Chanarin-Dorfman_syndrome (300)                                                                                                                                                    |
| 51119 | SBDS      | multiple                       | 1 | 0  | 1 Shwachman-Diamond_syndrome (1389)                                                                                                                                                  |
| 51128 | SAR1B     | Gastrointestinal               | 2 | 0  | 1 Anderson_disease (108), Chylomicron_retention_disease (330)                                                                                                                        |
| 51131 | PHF11     | Grey                           | 2 | 12 | 2 Asthma (153), IgE_levels_QTL (797)                                                                                                                                                 |
| 51135 | IRAK4     | Immunological                  | 1 | 0  | 1 IRAK4_deficiency (821)                                                                                                                                                             |
| 51151 | SLC45A2   | Grey                           | 2 | 2  | 2 Ocular_albinism (1130), Pigmentation_of_hair,_skin,_and_eyes,_variation_in (1227)                                                                                                  |
| 51156 | SERPINA10 | Cardiovascular                 | 1 | 1  | 1 Venous_thrombosis (1557)                                                                                                                                                           |
| 51168 | MYO15A    | Ear,Nose,Throat                | 1 | 40 | 1 Deafness (406)                                                                                                                                                                     |
| 51185 | CRBN      | Neurological                   | 1 | 23 | 1 Mental_retardation (990)                                                                                                                                                           |
| 51251 | NT5C3     | Hematological                  | 1 | 8  | 1 Anemia (110)                                                                                                                                                                       |
| 51324 | SPG21     | Neurological                   | 1 | 0  | 1 Mast_syndrome (960)                                                                                                                                                                |
| 51422 | PRKAG2    | Cardiovascular                 | 2 | 24 | 1 Cardiomyopathy (268), Wolff-Parkinson-White_syndrome (1601)                                                                                                                        |
| 51592 | TRIM33    | Cancer                         | 1 | 10 | 1 Thyroid_carcinoma (1503)                                                                                                                                                           |
| 51684 | SUFU      | Cancer                         | 1 | 1  | 1 Medulloblastoma (970)                                                                                                                                                              |
| 51733 | UPB1      | Metabolic                      | 1 | 0  | 1 Beta-ureidopropionase_deficiency (199)                                                                                                                                             |
| 51738 | GHRL      | Nutritional                    | 1 | 20 | 1 Obesity (1126)                                                                                                                                                                     |
| 51741 | WWOX      | Cancer                         | 1 | 3  | 1 Esophageal_cancer (508)                                                                                                                                                            |
| 53904 | MYO3A     | Ear,Nose,Throat                | 1 | 40 | 1 Deafness (406)                                                                                                                                                                     |
| 53947 | A4GALT    | Hematological                  | 1 | 22 | 1 Blood_group (212)                                                                                                                                                                  |
| 54209 | TREM2     | Bone                           | 1 | 1  | 1 Nasu-Hakola_disease (1075)                                                                                                                                                         |

|       |          |                            |   |    |   |                                                                                                             |
|-------|----------|----------------------------|---|----|---|-------------------------------------------------------------------------------------------------------------|
| 54332 | GDAP1    | Neurological               | 1 | 17 | 1 | Charcot-Marie-Tooth_disease (301)                                                                           |
| 54345 | SOX18    | Dermatological             | 1 | 3  | 1 | Hypotrichosis (788)                                                                                         |
| 54361 | WNT4     | Developmental              | 1 | 0  | 1 | Rokitansky-Kuster-Hauser_syndrome (1337)                                                                    |
| 54413 | NLGN3    | Psychiatric                | 2 | 3  | 1 | Asperger_syndrome (151), Autism (173)                                                                       |
| 54658 | UGT1A1   | Grey                       | 3 | 0  | 3 | Crigler-Najjar_syndrome (389), Gilbert_syndrome (586), Hyperbilirubinemia (720)                             |
| 54714 | CNGB3    | Ophthalmological           | 2 | 6  | 1 | Achromatopsia (29), Macular_degeneration (937)                                                              |
| 54806 | AHI1     | multiple                   | 1 | 1  | 1 | Joubert_syndrome (831)                                                                                      |
| 54808 | DYM      | Grey                       | 2 | 0  | 2 | Dyggve-Melchior-Clausen_disease (452), Smith-McCort_dysplasia (1412)                                        |
| 54829 | ASPN     | Connective_tissue_disorder | 1 | 3  | 1 | Osteoarthritis (1154)                                                                                       |
| 54840 | APTX     | Neurological               | 1 | 4  | 1 | Ataxia (154)                                                                                                |
| 54880 | BCOR     | Grey                       | 2 | 2  | 2 | Microphthalmia (1012), Oculofaciocardiodental_syndrome (1133)                                               |
| 54904 | WHSC1L1  | Cancer                     | 1 | 36 | 1 | Leukemia (886)                                                                                              |
| 54982 | CLN6     | Neurological               | 1 | 5  | 1 | Ceroid-lipofuscinosis (296)                                                                                 |
| 55109 | AGGF1    | multiple                   | 1 | 0  | 1 | Klippel-Trenaunay_syndrome (853)                                                                            |
| 55120 | FANCL    | multiple                   | 1 | 10 | 1 | Fanconi_anemia (523)                                                                                        |
| 55212 | BBS7     | multiple                   | 1 | 7  | 1 | Bardet-Biedl_syndrome (183)                                                                                 |
| 55343 | SLC35C1  | Metabolic                  | 1 | 12 | 1 | Congenital_disorder_of_glycosylation (354)                                                                  |
| 55605 | KIF21A   | Ophthalmological           | 1 | 1  | 1 | Fibrosis (538)                                                                                              |
| 55612 | C20orf42 | Dermatological             | 1 | 0  | 1 | Kindler_syndrome (850)                                                                                      |
| 55624 | POMGNT1  | multiple                   | 1 | 0  | 1 | Muscle-eye-brain_disease (1038)                                                                             |
| 55630 | SLC39A4  | Dermatological             | 1 | 0  | 1 | Acrodermatitis_enteropathica (34)                                                                           |
| 55636 | CHD7     | multiple                   | 1 | 0  | 1 | CHARGE_syndrome (302)                                                                                       |
| 55670 | PEX26    | Grey                       | 3 | 13 | 2 | Adrenoleukodystrophy (56), Refsum_disease (1307), Zellweger_syndrome (1615)                                 |
| 55755 | CDK5RAP2 | Neurological               | 1 | 4  | 1 | Microcephaly (1007)                                                                                         |
| 55775 | TDP1     | Neurological               | 1 | 12 | 1 | Spinocerebellar_ataxia (1428)                                                                               |
| 55806 | HR       | Dermatological             | 2 | 0  | 1 | Alopecia_universalis (85), Atrichia_with_papular_lesions (167)                                              |
| 55811 | SAC      | Renal                      | 1 | 0  | 1 | Hypercalciuria (721)                                                                                        |
| 55835 | CENPJ    | Neurological               | 1 | 4  | 1 | Microcephaly (1007)                                                                                         |
| 55997 | CFC1     | Grey                       | 3 | 2  | 3 | Double-outlet_right_ventricle (444), Heterotaxy (675), Transposition_of_great_arteries_dextro-looped (1519) |
| 56052 | ALG1     | Metabolic                  | 1 | 12 | 1 | Congenital_disorder_of_glycosylation (354)                                                                  |
| 56172 | ANKH     | Grey                       | 2 | 0  | 2 | Chondrocalcinosis (314), Craniometaphyseal_dysplasia (382)                                                  |
| 56244 | BTNL2    | Immunological              | 1 | 2  | 1 | Sarcoidosis (1349)                                                                                          |
| 56246 | MRAP     | Endocrine                  | 1 | 1  | 1 | Glucocorticoid_deficiency (598)                                                                             |
| 56262 | LRRC8A   | Hematological              | 1 | 3  | 1 | Agammaglobulinemia (63)                                                                                     |
| 56652 | PEO1     | Ophthalmological           | 1 | 2  | 1 | Progressive_external_ophthalmoplegia_with_mitochondrial_DNA_deletions (1265)                                |
| 56729 | RETN     | Grey                       | 2 | 37 | 2 | Diabetes_mellitus (427), Hypertension (752)                                                                 |
| 56922 | MCCC1    | Metabolic                  | 1 | 1  | 1 | 3-Methylcrotonyl-CoA_carboxylase_deficiency (7)                                                             |
| 57096 | RPGRIP1  | Ophthalmological           | 2 | 9  | 1 | Cone_dystrophy (352), Leber_congenital_amaurosis (873)                                                      |
| 57152 | SLURP1   | Dermatological             | 1 | 0  | 1 | Meleda_disease (979)                                                                                        |
| 57165 | GJA12    | Neurological               | 1 | 0  | 1 | (null) (1201)                                                                                               |
| 57167 | SALL4    | multiple                   | 1 | 0  | 1 | Duane_syndrome (449)                                                                                        |
| 57190 | SEPN1    | Muscular                   | 1 | 17 | 1 | Muscular_dystrophy (1040)                                                                                   |
| 57192 | MCOLN1   | Metabolic                  | 1 | 2  | 1 | Mucopolidosis (1032)                                                                                        |
| 57214 | KIAA1199 | Ear,Nose,Throat            | 1 | 40 | 1 | Deafness (406)                                                                                              |
| 57338 | JPH3     | Neurological               | 1 | 3  | 1 | Huntington_disease (708)                                                                                    |
| 57379 | AICDA    | Immunological              | 1 | 5  | 1 | Immunodeficiency (802)                                                                                      |
| 57502 | NLGN4X   | Grey                       | 3 | 25 | 2 | Asperger_syndrome (151), Autism (173), Mental_retardation (990)                                             |
| 57591 | MKL1     | Cancer                     | 1 | 0  | 1 | Megakaryoblastic_leukemia_acute (973)                                                                       |
| 57679 | ALS2     | Neurological               | 3 | 13 | 1 | Amyotrophic_lateral_sclerosis (104), Primary_lateral_sclerosis (1261), Spastic_ataxia/paraplegia (1418)     |

|       |          |                  |   |    |   |                                                                                                        |
|-------|----------|------------------|---|----|---|--------------------------------------------------------------------------------------------------------|
| 57697 | FANCM    | multiple         | 1 | 10 | 1 | Fanconi_anemia (523)                                                                                   |
| 57716 | PRX      | multiple         | 1 | 3  | 1 | Dejerine-Sottas_disease (410)                                                                          |
| 57817 | HAMP     | Metabolic        | 1 | 4  | 1 | Hemochromatosis (657)                                                                                  |
| 59344 | ALOXE3   | Dermatological   | 1 | 2  | 1 | Ichthyosiform_erythroderma (793)                                                                       |
| 60386 | SLC25A19 | Neurological     | 1 | 4  | 1 | Microcephaly (1007)                                                                                    |
| 60506 | NYX      | Ophthalmological | 1 | 4  | 1 | Night_blindness (1110)                                                                                 |
| 60528 | ELAC2    | Cancer           | 1 | 11 | 1 | Prostate_cancer (1272)                                                                                 |
| 60529 | ALX4     | Skeletal         | 1 | 1  | 1 | Parietal_foramina (1190)                                                                               |
| 63869 | PSORS6   | Dermatological   | 1 | 1  | 1 | Psoriasis (1288)                                                                                       |
| 64072 | CDH23    | Grey             | 2 | 44 | 2 | Deafness (406), Usher_syndrome (1551)                                                                  |
| 64087 | MCCC2    | Metabolic        | 1 | 1  | 1 | 3-Methylcrotonyl-CoA_carboxylase_deficiency (7)                                                        |
| 64127 | CARD15   | Grey             | 4 | 4  | 4 | Blau_syndrome (208), Crohn_disease (390), Psoriasis (1288), Sarcoidosis (1349)                         |
| 64221 | ROBO3    | Neurological     | 1 | 0  | 1 | Gaze_palsy (576)                                                                                       |
| 64240 | ABCG5    | Metabolic        | 1 | 1  | 1 | Sitosterolemia (1398)                                                                                  |
| 64241 | ABCG8    | Metabolic        | 1 | 1  | 1 | Sitosterolemia (1398)                                                                                  |
| 64324 | NSD1     | Grey             | 3 | 3  | 2 | Beckwith-Wiedemann_syndrome (194), Sotos_syndrome (1417), Weaver_syndrome (1582)                       |
| 64327 | LMBR1    | Skeletal         | 1 | 0  | 1 | Acheiropody (25)                                                                                       |
| 64342 | HS1BP3   | Neurological     | 1 | 0  | 1 | Tremor_familial_essential (1521)                                                                       |
| 64421 | DCLRE1C  | Immunological    | 2 | 7  | 1 | Omenn_syndrome (1141), Severe_combined_immunodeficiency (1383)                                         |
| 64699 | TMPRSS3  | Ear,Nose,Throat  | 1 | 40 | 1 | Deafness (406)                                                                                         |
| 64805 | P2RY12   | Hematological    | 1 | 3  | 1 | Platelet_defect/deficiency (1237)                                                                      |
| 65018 | PINK1    | Neurological     | 1 | 10 | 1 | Parkinson_disease (1192)                                                                               |
| 65078 | RTN4R    | Psychiatric      | 1 | 8  | 1 | Schizophrenia (1359)                                                                                   |
| 65125 | WNK1     | Endocrine        | 1 | 5  | 1 | Pseudohypoaldosteronism (1281)                                                                         |
| 65217 | PCDH15   | Grey             | 2 | 44 | 2 | Deafness (406), Usher_syndrome (1551)                                                                  |
| 65266 | WNK4     | Endocrine        | 1 | 5  | 1 | Pseudohypoaldosteronism (1281)                                                                         |
| 78987 | CRELD1   | Cardiovascular   | 1 | 2  | 1 | Atrioventricular_block (168)                                                                           |
| 79001 | VKORC1   | Hematological    | 2 | 3  | 1 | Vitamin_K-dependent_coagulation_defect (1565), Warfarin_resistance/sensitivity (1580)                  |
| 79053 | ALG8     | Metabolic        | 1 | 12 | 1 | Congenital_disorder_of_glycosylation (354)                                                             |
| 79058 | ASPSR1   | Cancer           | 1 | 0  | 1 | Alveolar_soft-part_sarcoma (97)                                                                        |
| 79083 | MLPH     | Dermatological   | 1 | 2  | 1 | Griselli_syndrome (627)                                                                                |
| 79087 | ALG12    | Metabolic        | 1 | 12 | 1 | Congenital_disorder_of_glycosylation (354)                                                             |
| 79147 | FKRP     | Muscular         | 1 | 17 | 1 | Muscular_dystrophy (1040)                                                                              |
| 79158 | GNPTAB   | Metabolic        | 1 | 2  | 1 | Mucopolidosis (1032)                                                                                   |
| 79577 | CDC73    | Grey             | 2 | 2  | 2 | Hyperparathyroidism (743), Parathyroid_adenoma (1189)                                                  |
| 79628 | SH3TC2   | Neurological     | 1 | 17 | 1 | Charcot-Marie-Tooth_disease (301)                                                                      |
| 79648 | MCPH1    | Neurological     | 2 | 4  | 1 | Microcephaly (1007), Premature_chromosome_condensation_with_microcephaly_and_mental_retardation (3260) |
| 79751 | SLC25A22 | Neurological     | 1 | 16 | 1 | Epilepsy (495)                                                                                         |
| 79784 | MYH14    | Ear,Nose,Throat  | 1 | 40 | 1 | Deafness (406)                                                                                         |
| 79796 | ALG9     | Metabolic        | 1 | 12 | 1 | Congenital_disorder_of_glycosylation (354)                                                             |
| 79803 | HPS6     | multiple         | 1 | 6  | 1 | Hermansky-Pudlak_syndrome (670)                                                                        |
| 79944 | L2HGDH   | Metabolic        | 1 | 0  | 1 | L-2-hydroxyglutaric_aciduria (857)                                                                     |
| 79977 | GRHL2    | Ear,Nose,Throat  | 1 | 40 | 1 | Deafness (406)                                                                                         |
| 80025 | PANK2    | Grey             | 2 | 0  | 2 | HARP_syndrome (640), Neurodegeneration (1092)                                                          |
| 80144 | FRAS1    | multiple         | 1 | 1  | 1 | Fraser_syndrome (551)                                                                                  |
| 80207 | OPA3     | Grey             | 2 | 1  | 2 | 3-methylglutaconicaciduria (9), Optic_atrophy (1144)                                                   |
| 80270 | HSD3B7   | Gastrointestinal | 1 | 3  | 1 | Cholestasis (310)                                                                                      |
| 80324 | PUS1     | multiple         | 1 | 0  | 1 | Mitochondrial_myopathy_and_sideroblastic_anemia (7016)                                                 |
| 80704 | SLC19A3  | Neurological     | 1 | 1  | 1 | Basal_ganglia_disease (4188)                                                                           |
| 80781 | COL18A1  | multiple         | 1 | 0  | 1 | Knobloch_syndrome (855)                                                                                |

|        |          |                            |   |    |   |                                                                                                  |
|--------|----------|----------------------------|---|----|---|--------------------------------------------------------------------------------------------------|
| 81693  | AMN      | Hematological              | 1 | 1  | 1 | Megaloblastic_anemia (975)                                                                       |
| 81794  | ADAMTS10 | Connective_tissue_disorder | 1 | 1  | 1 | Weill-Marchesani_syndrome (1585)                                                                 |
| 81846  | SBF2     | Neurological               | 1 | 17 | 1 | Charcot-Marie-Tooth_disease (301)                                                                |
| 83605  | CCM2     | Neurological               | 1 | 2  | 1 | Cerebral_cavernous_malformations (4291)                                                          |
| 83715  | ESPN     | Ear,Nose,Throat            | 1 | 40 | 1 | Deafness (406)                                                                                   |
| 83844  | USP26    | Renal                      | 1 | 0  | 1 | Sertoli-cell-only_syndrome (1381)                                                                |
| 83872  | HMCN1    | Ophthalmological           | 1 | 4  | 1 | Macular_degeneration (937)                                                                       |
| 83990  | BRIP1    | Grey                       | 2 | 27 | 2 | Breast_cancer (228), Fanconi_anemia (523)                                                        |
| 84059  | MASS1    | Grey                       | 2 | 7  | 2 | Convulsions (359), Usher_syndrome (1551)                                                         |
| 84062  | DTNBP1   | multiple                   | 1 | 6  | 1 | Hermansky-Pudlak_syndrome (670)                                                                  |
| 84100  | ARL6     | multiple                   | 1 | 7  | 1 | Bardet-Biedl_syndrome (183)                                                                      |
| 84295  | PHF6     | multiple                   | 1 | 0  | 1 | Borjeson-Forssman-Lehmann_syndrome (218)                                                         |
| 84343  | HPS3     | multiple                   | 1 | 6  | 1 | Hermansky-Pudlak_syndrome (670)                                                                  |
| 84441  | MAML2    | Cancer                     | 1 | 1  | 1 | Mucoepidermoid_salivary_gland_carcinoma (1031)                                                   |
| 84572  | GNPTG    | Metabolic                  | 1 | 2  | 1 | Mucopolipidosis (1032)                                                                           |
| 84634  | GPR54    | Endocrine                  | 1 | 3  | 1 | Hypogonadotropic_hypogonadism (774)                                                              |
| 84916  | CIRH1A   | Gastrointestinal           | 1 | 2  | 1 | Cirrhosis (334)                                                                                  |
| 84930  | MASTL    | Hematological              | 1 | 3  | 1 | Thrombocytopenia (1494)                                                                          |
| 85300  | ATCAY    | Neurological               | 1 | 4  | 1 | Ataxia (154)                                                                                     |
| 85358  | SHANK3   | multiple                   | 1 | 0  | 1 | Chromosome_22q13.3_deletion_syndrome (326)                                                       |
| 85365  | ALG2     | Metabolic                  | 1 | 12 | 1 | Congenital_disorder_of_glycosylation (354)                                                       |
| 85366  | MYLK2    | Cardiovascular             | 1 | 24 | 1 | Cardiomyopathy (268)                                                                             |
| 85476  | GFM1     | multiple                   | 1 | 0  | 1 | Combined_oxidative_phosphorylation_deficiency (6350)                                             |
| 89781  | HPS4     | multiple                   | 1 | 6  | 1 | Hermansky-Pudlak_syndrome (670)                                                                  |
| 89884  | LHX4     | Skeletal                   | 1 | 2  | 1 | Short_stature (1387)                                                                             |
| 90411  | MCFD2    | Hematological              | 1 | 7  | 1 | Factor_x_deficiency (520)                                                                        |
| 91647  | ATPAF2   | multiple                   | 1 | 1  | 1 | Complex_mitochondrial_respiratory_chain_deficiency_of (351)                                      |
| 91949  | COG7     | Metabolic                  | 1 | 12 | 1 | Congenital_disorder_of_glycosylation (354)                                                       |
| 93986  | FOXP2    | Neurological               | 1 | 0  | 1 | Specific_language_impairment_QTL (1419)                                                          |
| 114327 | EFHC1    | Neurological               | 1 | 2  | 1 | Myoclonic_epilepsy (1055)                                                                        |
| 114548 | C1AS1    | Grey                       | 3 | 0  | 2 | CINCA_syndrome (332), Cold-induced_autoinflammatory_syndrome (344), Muckle-Wells_syndrome (1030) |
| 114902 | C1QTNF5  | Ophthalmological           | 1 | 3  | 1 | Retinal_cone_dystrophy (1315)                                                                    |
| 115761 | ARL11    | Cancer                     | 1 | 36 | 1 | Leukemia (886)                                                                                   |
| 116085 | SLC22A12 | Renal                      | 1 | 0  | 1 | Hypouricemia (791)                                                                               |
| 116519 | APOA5    | Metabolic                  | 1 | 3  | 1 | Hypertriglyceridemia (757)                                                                       |
| 117156 | SCGB3A2  | Respiratory                | 1 | 12 | 1 | Asthma (153)                                                                                     |
| 117531 | TMC1     | Ear,Nose,Throat            | 1 | 40 | 1 | Deafness (406)                                                                                   |
| 118429 | ANTXR2   | Grey                       | 2 | 1  | 2 | Fibromatosis1 (537), Hyalinosis_infantile_systemic (710)                                         |
| 120227 | CYP2R1   | Bone                       | 1 | 1  | 1 | Rickets (1330)                                                                                   |
| 120329 | CASP12P1 | Immunological              | 1 | 1  | 1 | Sepsis (1378)                                                                                    |
| 120892 | LRRK2    | Neurological               | 1 | 10 | 1 | Parkinson_disease (1192)                                                                         |
| 121278 | TPH2     | Psychiatric                | 1 | 0  | 1 | Unipolar_depression (1544)                                                                       |
| 122042 | LGR8     | Renal                      | 1 | 1  | 1 | Cryptorchidism (392)                                                                             |
| 123016 | TTC8     | multiple                   | 1 | 7  | 1 | Bardet-Biedl_syndrome (183)                                                                      |
| 123606 | NIPA1    | Neurological               | 1 | 8  | 1 | Spastic_ataxia/paraplegia (1418)                                                                 |
| 124590 | USH1G    | multiple                   | 1 | 7  | 1 | Usher_syndrome (1551)                                                                            |
| 127534 | GJB4     | Dermatological             | 1 | 2  | 1 | Erythrokeratoderma (507)                                                                         |
| 128178 | EDARADD  | Dermatological             | 1 | 7  | 1 | Ectodermal_dysplasia (466)                                                                       |
| 129880 | BBS5     | multiple                   | 1 | 7  | 1 | Bardet-Biedl_syndrome (183)                                                                      |

|        |          |                  |   |    |   |                                                                                                                                                             |
|--------|----------|------------------|---|----|---|-------------------------------------------------------------------------------------------------------------------------------------------------------------|
| 132884 | EVC2     | Skeletal         | 1 | 1  | 1 | Ellis-van_Creveld_syndrome (473)                                                                                                                            |
| 136647 | C7orf11  | Dermatological   | 1 | 3  | 1 | Trichothiodystrophy (1525)                                                                                                                                  |
| 140803 | TRPM6    | Renal            | 1 | 2  | 1 | Hypomagnesemia (778)                                                                                                                                        |
| 145226 | RDH12    | Ophthalmological | 1 | 6  | 1 | Leber_congenital_amaurosis (873)                                                                                                                            |
| 145873 | MESP2    | Skeletal         | 1 | 1  | 1 | Spondylocostal_dysostosis (1433)                                                                                                                            |
| 146059 | CDAN1    | Hematological    | 1 | 8  | 1 | Anemia (110)                                                                                                                                                |
| 146183 | OTOA     | Ear,Nose,Throat  | 1 | 40 | 1 | Deafness (406)                                                                                                                                              |
| 147138 | EVER2    | Dermatological   | 1 | 1  | 1 | Epidermodysplasia_verruciformis (492)                                                                                                                       |
| 147409 | DSG4     | Dermatological   | 1 | 3  | 1 | Hypotrichosis (788)                                                                                                                                         |
| 148738 | HFE2     | Metabolic        | 1 | 4  | 1 | Hemochromatosis (657)                                                                                                                                       |
| 149998 | LIPI     | Metabolic        | 1 | 3  | 1 | Hypertriglyceridemia (757)                                                                                                                                  |
| 157570 | ESCO2    | Developmental    | 1 | 0  | 1 | Roberts_syndrome (1334)                                                                                                                                     |
| 157680 | VPS13B   | multiple         | 1 | 0  | 1 | Cohen_syndrome (342)                                                                                                                                        |
| 161497 | STRC     | Ear,Nose,Throat  | 1 | 40 | 1 | Deafness (406)                                                                                                                                              |
| 161582 | DYX1C1   | Psychiatric      | 1 | 1  | 1 | Dyslexia (459)                                                                                                                                              |
| 162417 | NAGS     | Metabolic        | 1 | 0  | 1 | N-acetylglutamate_synthase_deficiency (1067)                                                                                                                |
| 166785 | MMAA     | Metabolic        | 1 | 2  | 1 | Methylmalonic_aciduria (1004)                                                                                                                               |
| 170302 | ARX      | Grey             | 6 | 28 | 2 | Infantile_spasm_syndrome (807), Lissencephaly (908), Mental_retardation (990), Myoclonic_epilepsy (1055), Partington_syndrome (1196), Proud_syndrome (1277) |
| 200576 | PIP5K3   | Ophthalmological | 1 | 6  | 1 | Corneal_dystrophy (362)                                                                                                                                     |
| 201163 | FLCN     | Grey             | 4 | 39 | 3 | Birt-Hogg-Dube_syndrome (205), Colon_cancer (346), Pneumothorax_primary_spontaneous (1239), Renal_cell_carcinoma (1308)                                     |
| 201294 | UNC13D   | Hematological    | 1 | 1  | 1 | Hemophagocytic_lymphohistiocytosis (662)                                                                                                                    |
| 203859 | TMEM16E  | Bone             | 1 | 0  | 1 | Gnathodiaphyseal_dysplasia (615)                                                                                                                            |
| 219736 | STOX1    | Cardiovascular   | 1 | 2  | 1 | Preeclampsia (1257)                                                                                                                                         |
| 255738 | PCSK9    | Metabolic        | 1 | 7  | 1 | Hypercholesterolemia (724)                                                                                                                                  |
| 256297 | PTF1A    | Endocrine        | 1 | 26 | 1 | Diabetes_mellitus (427)                                                                                                                                     |
| 257054 | MGC25181 | Metabolic        | 1 | 0  | 1 | D-2-hydroxyglutaric_aciduria (402)                                                                                                                          |
| 259236 | TMIE     | Ear,Nose,Throat  | 1 | 40 | 1 | Deafness (406)                                                                                                                                              |
| 259266 | ASPM     | Neurological     | 1 | 4  | 1 | Microcephaly (1007)                                                                                                                                         |
| 261734 | NPHP4    | Renal            | 2 | 4  | 1 | Nephronophthisis (1082), Senior-Loken_syndrome (1375)                                                                                                       |
| 283120 | H19      | multiple         | 1 | 3  | 1 | Beckwith-Wiedemann_syndrome (194)                                                                                                                           |
| 285362 | SUMF1    | Metabolic        | 1 | 0  | 1 | Multiple_sulfatase_deficiency (9039)                                                                                                                        |
| 285440 | CYP4V2   | Ophthalmological | 1 | 0  | 1 | Bietti_crystalline_corneoretinal_dystrophy (201)                                                                                                            |
| 319100 | TAAR6    | Psychiatric      | 1 | 8  | 1 | Schizophrenia (1359)                                                                                                                                        |
| 326625 | MMAB     | Metabolic        | 1 | 2  | 1 | Methylmalonic_aciduria (1004)                                                                                                                               |
| 338435 | SCA25    | Neurological     | 1 | 12 | 1 | Spinocerebellar_ataxia (1428)                                                                                                                               |
| 338917 | CHX10    | Ophthalmological | 1 | 2  | 1 | Microphthalmia (1012)                                                                                                                                       |
| 340024 | SLC6A19  | Metabolic        | 1 | 0  | 1 | Hartnup_disorder (641)                                                                                                                                      |
| 341640 | FREM2    | multiple         | 1 | 1  | 1 | Fraser_syndrome (551)                                                                                                                                       |
| 342880 | R9AP     | Ophthalmological | 1 | 1  | 1 | Bradyopsia (225)                                                                                                                                            |
| 347344 | ZNF81    | Neurological     | 1 | 23 | 1 | Mental_retardation (990)                                                                                                                                    |
| 348938 | ICHTHYIN | Dermatological   | 1 | 6  | 1 | Ichthyosis (794)                                                                                                                                            |
| 374291 | NDUFS7   | Neurological     | 1 | 11 | 1 | Leigh_syndrome (877)                                                                                                                                        |
| 375298 | CERKL    | Ophthalmological | 1 | 29 | 1 | Retinitis_pigmentosa (1316)                                                                                                                                 |
| 375611 | SLC26A5  | Ear,Nose,Throat  | 1 | 40 | 1 | Deafness (406)                                                                                                                                              |
| 378465 | HSN2     | Neurological     | 1 | 7  | 1 | Neuropathy (1099)                                                                                                                                           |
| 378884 | NHLRC1   | Neurological     | 1 | 16 | 1 | Epilepsy (495)                                                                                                                                              |
| 387082 | SUMO4    | Endocrine        | 1 | 26 | 1 | Diabetes_mellitus (427)                                                                                                                                     |
| 387129 | GPR154   | Respiratory      | 1 | 12 | 1 | Asthma (153)                                                                                                                                                |

|        |        |                |   |   |   |                            |
|--------|--------|----------------|---|---|---|----------------------------|
| 387281 | LCRB   | Hematological  | 1 | 4 | 1 | Thalassemias (1486)        |
| 404672 | GTF2H5 | Dermatological | 1 | 3 | 1 | Trichothiodystrophy (1525) |
| 493818 | MYMY3  | Neurological   | 1 | 0 | 1 | Moyamoya_disease (1029)    |
