# Supplementary material
Source: PubMed Central journal article supplement (PMC1885563)
Supplement: pnas_0701361104_13.pdf [file pnas_0701361104_13.pdf]

Supporting Information Table 4. List of human protein-protein interactors.

| Entrez ID 1 | Symbol 1 | Entrez ID 2 | Symbol 2 | Data Source (R: Rual et al; S: Stelzl et al; L: Literature curation) |
|-------------|----------|-------------|----------|----------------------------------------------------------------------|
| 1           | A1BG     | 10321       | CRISP3   | L                                                                    |
| 2           | A2M      | 259         | AMBP     | L                                                                    |
| 2           | A2M      | 348         | APOE     | L                                                                    |
| 2           | A2M      | 351         | APP      | L                                                                    |
| 2           | A2M      | 354         | KLK3     | L                                                                    |
| 2           | A2M      | 567         | B2M      | L                                                                    |
| 2           | A2M      | 1508        | CTSB     | L                                                                    |
| 2           | A2M      | 1990        | ELA1     | L                                                                    |
| 2           | A2M      | 3309        | HSPA5    | L                                                                    |
| 2           | A2M      | 3553        | IL1B     | L                                                                    |
| 2           | A2M      | 3586        | IL10     | L                                                                    |
| 2           | A2M      | 3931        | LCAT     | L                                                                    |
| 2           | A2M      | 3952        | LEP      | L                                                                    |
| 2           | A2M      | 4035        | LRP1     | L                                                                    |
| 2           | A2M      | 4803        | NGFB     | L                                                                    |
| 2           | A2M      | 5047        | PAEP     | L                                                                    |
| 2           | A2M      | 7045        | TGFBI    | L                                                                    |
| 2           | A2M      | 8728        | ADAM19   | L                                                                    |
| 2           | A2M      | 9510        | ADAMTS1  | L                                                                    |
| 2           | A2M      | 10944       | SMAP     | S                                                                    |
| 2           | A2M      | 55729       | ATF7IP   | L                                                                    |
| 9           | NAT1     | 8260        | ARD1A    | L                                                                    |
| 12          | SERPINA3 | 351         | APP      | L                                                                    |
| 12          | SERPINA3 | 354         | KLK3     | L                                                                    |
| 12          | SERPINA3 | 1215        | CMA1     | L                                                                    |
| 12          | SERPINA3 | 1504        | CTRB1    | L                                                                    |
| 12          | SERPINA3 | 1506        | CTRL     | L                                                                    |
| 12          | SERPINA3 | 1511        | CTSG     | L                                                                    |
| 12          | SERPINA3 | 1990        | ELA1     | L                                                                    |
| 12          | SERPINA3 | 1991        | ELA2     | L                                                                    |
| 12          | SERPINA3 | 2064        | ERBB2    | L                                                                    |
| 12          | SERPINA3 | 2153        | F5       | L                                                                    |
| 12          | SERPINA3 | 3817        | KLK2     | L                                                                    |
| 12          | SERPINA3 | 4035        | LRP1     | L                                                                    |
| 12          | SERPINA3 | 4485        | MST1     | L                                                                    |
| 12          | SERPINA3 | 5422        | POLA     | L                                                                    |
| 12          | SERPINA3 | 64215       | DNAJC1   | L                                                                    |
| 14          | AAMP     | 51497       | TH1L     | S                                                                    |
| 15          | AANAT    | 7534        | YWHAZ    | L                                                                    |
| 18          | ABAT     | 7915        | ALDH5A1  | L                                                                    |
| 19          | ABCA1    | 335         | APOA1    | L                                                                    |
| 19          | ABCA1    | 6645        | SNTB2    | L                                                                    |
| 19          | ABCA1    | 8772        | FADD     | L                                                                    |
| 20          | ABCA2    | 55755       | CDK5RAP2 | L                                                                    |
| 22          | ABCB7    | 2235        | FECH     | L                                                                    |
| 23          | ABCF1    | 3692        | ITGB4BP  | S                                                                    |
| 24          | ABCA4    | 1258        | CNGB1    | L                                                                    |
| 25          | ABL1     | 27          | ABL2     | L                                                                    |
| 25          | ABL1     | 472         | ATM      | L                                                                    |
| 25          | ABL1     | 613         | BCR      | L                                                                    |
| 25          | ABL1     | 718         | C3       | L                                                                    |
| 25          | ABL1     | 867         | CBL      | L                                                                    |
| 25          | ABL1     | 1501        | CTNND2   | L                                                                    |
| 25          | ABL1     | 2048        | EPHB2    | L                                                                    |
| 25          | ABL1     | 2547        | XRCC6    | L                                                                    |
| 25          | ABL1     | 2876        | GPX1     | L                                                                    |
| 25          | ABL1     | 2885        | GRB2     | L                                                                    |
| 25          | ABL1     | 3055        | HCK      | L                                                                    |
| 25          | ABL1     | 3636        | INPPL1   | L                                                                    |
| 25          | ABL1     | 3716        | JAK1     | L                                                                    |
| 25          | ABL1     | 4193        | MDM2     | L                                                                    |
| 25          | ABL1     | 4690        | NCK1     | L                                                                    |
| 25          | ABL1     | 4914        | NTRK1    | L                                                                    |
| 25          | ABL1     | 5062        | PAK2     | L                                                                    |
| 25          | ABL1     | 5295        | PIK3R1   | L                                                                    |

|    |       |        |          |   |
|----|-------|--------|----------|---|
| 25 | ABL1  | 5335   | PLCG1    | L |
| 25 | ABL1  | 5591   | PRKDC    | L |
| 25 | ABL1  | 5829   | PXN      | L |
| 25 | ABL1  | 5883   | RAD9A    | L |
| 25 | ABL1  | 5901   | RAN      | L |
| 25 | ABL1  | 5921   | RASA1    | L |
| 25 | ABL1  | 5925   | RB1      | L |
| 25 | ABL1  | 5989   | RFX1     | L |
| 25 | ABL1  | 6091   | ROBO1    | L |
| 25 | ABL1  | 6098   | ROS1     | L |
| 25 | ABL1  | 6549   | SLC9A2   | L |
| 25 | ABL1  | 6714   | SRC      | L |
| 25 | ABL1  | 6764   | ST5      | L |
| 25 | ABL1  | 7157   | TP53     | L |
| 25 | ABL1  | 7161   | TP73     | L |
| 25 | ABL1  | 7275   | TUB      | L |
| 25 | ABL1  | 7535   | ZAP70    | L |
| 25 | ABL1  | 8751   | ADAM15   | L |
| 25 | ABL1  | 8936   | WASF1    | L |
| 25 | ABL1  | 9051   | PSTPIP1  | L |
| 25 | ABL1  | 9564   | BCAR1    | L |
| 25 | ABL1  | 9610   | RIN1     | L |
| 25 | ABL1  | 10006  | ABI1     | L |
| 25 | ABL1  | 10152  | ABI2     | L |
| 25 | ABL1  | 10580  | SORBS1   | L |
| 25 | ABL1  | 11183  | MAP4K5   | L |
| 25 | ABL1  | 23385  | NCSTN    | L |
| 25 | ABL1  | 23616  | SH3BP1   | L |
| 25 | ABL1  | 51466  | EVL      | L |
| 25 | ABL1  | 55824  | PAG1     | L |
| 25 | ABL1  | 91746  | YT521    | L |
| 26 | ABP1  | 1785   | DNM2     | L |
| 27 | ABL2  | 613    | BCR      | L |
| 27 | ABL2  | 847    | CAT      | L |
| 27 | ABL2  | 1398   | CRK      | L |
| 27 | ABL2  | 2048   | EPHB2    | L |
| 27 | ABL2  | 2876   | GPX1     | L |
| 27 | ABL2  | 3055   | HCK      | L |
| 31 | ACACA | 672    | BRCA1    | L |
| 31 | ACACA | 1114   | CHGB     | S |
| 39 | ACAT2 | 1045   | CDX2     | L |
| 40 | ACCN1 | 41     | ACCN2    | L |
| 40 | ACCN1 | 9311   | ACCN3    | L |
| 43 | ACHE  | 351    | APP      | L |
| 43 | ACHE  | 1282   | COL4A1   | L |
| 43 | ACHE  | 1939   | LGTN     | L |
| 43 | ACHE  | 8292   | COLQ     | L |
| 43 | ACHE  | 284217 | LAMA1    | L |
| 49 | ACR   | 5104   | SERPINA5 | L |
| 49 | ACR   | 7783   | ZP2      | L |
| 51 | ACOX1 | 6342   | SCP2     | L |
| 52 | ACP1  | 1969   | EPHA2    | L |
| 52 | ACP1  | 2047   | EPHB1    | L |
| 52 | ACP1  | 2048   | EPHB2    | L |
| 52 | ACP1  | 7535   | ZAP70    | L |
| 52 | ACP1  | 51460  | SFMBT1   | R |
| 52 | ACP1  | 54874  | FNBP1L   | S |
| 52 | ACP1  | 55052  | MRPL20   | S |
| 54 | ACP5  | 1959   | EGR2     | S |
| 54 | ACP5  | 2239   | GPC4     | L |
| 54 | ACP5  | 5601   | MAPK9    | S |
| 54 | ACP5  | 6118   | RPA2     | S |
| 54 | ACP5  | 7704   | ZBTB16   | S |
| 54 | ACP5  | 8743   | TNFSF10  | S |
| 54 | ACP5  | 9141   | PDCD5    | S |
| 54 | ACP5  | 9410   | WDR57    | S |
| 54 | ACP5  | 54978  | C2orf18  | S |

|    |       |        |         |   |
|----|-------|--------|---------|---|
| 58 | ACTA1 | 1072   | CFL1    | L |
| 58 | ACTA1 | 1756   | DMD     | L |
| 58 | ACTA1 | 1773   | DNASE1  | L |
| 58 | ACTA1 | 2638   | GC      | L |
| 58 | ACTA1 | 2934   | GSN     | L |
| 58 | ACTA1 | 4632   | MYL1    | L |
| 58 | ACTA1 | 5216   | PFN1    | L |
| 58 | ACTA1 | 5578   | PRKCA   | L |
| 58 | ACTA1 | 5879   | RAC1    | L |
| 58 | ACTA1 | 6525   | SMTN    | L |
| 58 | ACTA1 | 6624   | FSCN1   | L |
| 58 | ACTA1 | 6876   | TAGLN   | L |
| 58 | ACTA1 | 7094   | TLN1    | L |
| 58 | ACTA1 | 7114   | TMSB4X  | L |
| 58 | ACTA1 | 7187   | TRAF3   | L |
| 58 | ACTA1 | 9468   | PCYT1B  | L |
| 58 | ACTA1 | 10575  | CCT4    | L |
| 58 | ACTA1 | 22948  | CCT5    | L |
| 59 | ACTA2 | 1072   | CFL1    | L |
| 59 | ACTA2 | 1773   | DNASE1  | L |
| 59 | ACTA2 | 2638   | GC      | L |
| 59 | ACTA2 | 4632   | MYL1    | L |
| 59 | ACTA2 | 7114   | TMSB4X  | L |
| 59 | ACTA2 | 9468   | PCYT1B  | L |
| 59 | ACTA2 | 10575  | CCT4    | L |
| 59 | ACTA2 | 22948  | CCT5    | L |
| 60 | ACTB  | 70     | ACTC    | L |
| 60 | ACTB  | 71     | ACTG1   | R |
| 60 | ACTB  | 1072   | CFL1    | R |
| 60 | ACTB  | 1073   | CFL2    | R |
| 60 | ACTB  | 2010   | EMD     | L |
| 60 | ACTB  | 2314   | FLII    | L |
| 60 | ACTB  | 2934   | GSN     | L |
| 60 | ACTB  | 4093   | SMAD9   | L |
| 60 | ACTB  | 4687   | NCF1    | L |
| 60 | ACTB  | 4892   | NRAP    | L |
| 60 | ACTB  | 5027   | P2RX7   | L |
| 60 | ACTB  | 5201   | PFDN1   | L |
| 60 | ACTB  | 5216   | PFN1    | L |
| 60 | ACTB  | 5217   | PFN2    | L |
| 60 | ACTB  | 5337   | PLD1    | L |
| 60 | ACTB  | 5338   | PLD2    | L |
| 60 | ACTB  | 5764   | PTN     | L |
| 60 | ACTB  | 5879   | RAC1    | L |
| 60 | ACTB  | 5880   | RAC2    | L |
| 60 | ACTB  | 6336   | SCN10A  | L |
| 60 | ACTB  | 6597   | SMARCA4 | L |
| 60 | ACTB  | 6709   | SPTAN1  | L |
| 60 | ACTB  | 7168   | TPM1    | L |
| 60 | ACTB  | 7169   | TPM2    | L |
| 60 | ACTB  | 7170   | TPM3    | L |
| 60 | ACTB  | 7430   | VIL2    | L |
| 60 | ACTB  | 7447   | VSNL1   | L |
| 60 | ACTB  | 8655   | DNCL1   | L |
| 60 | ACTB  | 8904   | CPNE1   | L |
| 60 | ACTB  | 11034  | DSTN    | R |
| 60 | ACTB  | 23214  | XPO6    | L |
| 60 | ACTB  | 25932  | CLIC4   | L |
| 60 | ACTB  | 55729  | ATF7IP  | L |
| 60 | ACTB  | 83988  | NCALD   | L |
| 60 | ACTB  | 131034 | CPNE4   | L |
| 60 | ACTB  | 221184 | CPNE2   | L |
| 70 | ACTC  | 81     | ACTN4   | L |
| 70 | ACTC  | 283    | ANG     | L |
| 70 | ACTC  | 1072   | CFL1    | L |
| 70 | ACTC  | 1756   | DMD     | L |
| 70 | ACTC  | 2039   | EPB49   | L |

|    |        |        |          |    |
|----|--------|--------|----------|----|
| 70 | ACTC   | 2638   | GC       | L  |
| 70 | ACTC   | 3315   | HSPB1    | L  |
| 70 | ACTC   | 3927   | LASP1    | L  |
| 70 | ACTC   | 4638   | MYLK     | L  |
| 70 | ACTC   | 5339   | PLEC1    | L  |
| 70 | ACTC   | 5581   | PRKCE    | L  |
| 70 | ACTC   | 5756   | PTK9     | L  |
| 70 | ACTC   | 6624   | FSCN1    | L  |
| 70 | ACTC   | 7094   | TLN1     | L  |
| 70 | ACTC   | 7414   | VCL      | L  |
| 70 | ACTC   | 7430   | VIL2     | L  |
| 70 | ACTC   | 7454   | WAS      | L  |
| 70 | ACTC   | 7456   | WASPIP   | L  |
| 70 | ACTC   | 8655   | DNCL1    | L  |
| 70 | ACTC   | 10097  | ACTR2    | L  |
| 70 | ACTC   | 23224  | SYNE2    | L  |
| 70 | ACTC   | 23345  | SYNE1    | L  |
| 70 | ACTC   | 51660  | BRP44L   | S  |
| 70 | ACTC   | 60312  | AFAP     | L  |
| 70 | ACTC   | 84687  | PPP1R9B  | L  |
| 70 | ACTC   | 85477  | SCIN     | L  |
| 70 | ACTC   | 137735 | STARS    | L  |
| 71 | ACTG1  | 308    | ANXA5    | L  |
| 71 | ACTG1  | 1072   | CFL1     | R  |
| 71 | ACTG1  | 1073   | CFL2     | R  |
| 71 | ACTG1  | 1773   | DNASE1   | L  |
| 71 | ACTG1  | 3692   | ITGB4BP  | S  |
| 71 | ACTG1  | 4640   | MYO1A    | L  |
| 71 | ACTG1  | 5217   | PFN2     | S  |
| 71 | ACTG1  | 5800   | PTPRO    | S  |
| 71 | ACTG1  | 5829   | PXN      | L  |
| 71 | ACTG1  | 6456   | SH3GL2   | S  |
| 71 | ACTG1  | 6487   | ST3GAL3  | S  |
| 71 | ACTG1  | 7094   | TLN1     | L  |
| 71 | ACTG1  | 7114   | TMSB4X   | L  |
| 71 | ACTG1  | 7414   | VCL      | L  |
| 71 | ACTG1  | 8655   | DNCL1    | L  |
| 71 | ACTG1  | 8936   | WASF1    | L  |
| 71 | ACTG1  | 10134  | BCAP31   | L  |
| 71 | ACTG1  | 11034  | DSTN     | R  |
| 71 | ACTG1  | 11098  | PRSS23   | S  |
| 71 | ACTG1  | 55729  | ATF7IP   | L  |
| 81 | ACTN4  | 135    | ADORA2A  | L  |
| 81 | ACTN4  | 525    | ATP6V1B1 | L  |
| 81 | ACTN4  | 818    | CAMK2G   | L  |
| 81 | ACTN4  | 1308   | COL17A1  | L  |
| 81 | ACTN4  | 2934   | GSN      | L  |
| 81 | ACTN4  | 3688   | ITGB1    | L  |
| 81 | ACTN4  | 4703   | NEB      | L  |
| 81 | ACTN4  | 9124   | PDLIM1   | RL |
| 81 | ACTN4  | 9223   | MAGI1    | L  |
| 81 | ACTN4  | 9351   | SLC9A3R2 | L  |
| 81 | ACTN4  | 9712   | USP6NL   | L  |
| 81 | ACTN4  | 10612  | TRIM3    | L  |
| 81 | ACTN4  | 51778  | MYOZ2    | R  |
| 81 | ACTN4  | 57554  | LRRC7    | L  |
| 81 | ACTN4  | 58529  | MYOZ1    | R  |
| 86 | ACTL6A | 396    | ARHGDI1A | S  |
| 86 | ACTL6A | 2130   | EWSR1    | R  |
| 86 | ACTL6A | 4609   | MYC      | L  |
| 86 | ACTL6A | 5430   | POLR2A   | L  |
| 86 | ACTL6A | 6597   | SMARCA4  | L  |
| 86 | ACTL6A | 9031   | BAZ1B    | L  |
| 87 | ACTN1  | 135    | ADORA2A  | L  |
| 87 | ACTN1  | 815    | CAMK2A   | L  |
| 87 | ACTN1  | 1308   | COL17A1  | L  |
| 87 | ACTN1  | 1495   | CTNNA1   | L  |

|    |        |        |          |    |
|----|--------|--------|----------|----|
| 87 | ACTN1  | 2203   | FBP1     | L  |
| 87 | ACTN1  | 2903   | GRIN2A   | L  |
| 87 | ACTN1  | 4110   | MAGEA11  | R  |
| 87 | ACTN1  | 5585   | PKN1     | L  |
| 87 | ACTN1  | 5834   | PYGB     | L  |
| 87 | ACTN1  | 7273   | TTN      | L  |
| 87 | ACTN1  | 7518   | XRCC4    | R  |
| 87 | ACTN1  | 7791   | ZYX      | L  |
| 87 | ACTN1  | 8048   | CSRP3    | L  |
| 87 | ACTN1  | 8851   | CDK5R1   | L  |
| 87 | ACTN1  | 8941   | CDK5R2   | L  |
| 87 | ACTN1  | 9124   | PDLIM1   | L  |
| 87 | ACTN1  | 9499   | MYOT     | L  |
| 87 | ACTN1  | 10755  | GIPC1    | L  |
| 87 | ACTN1  | 26136  | TES      | L  |
| 87 | ACTN1  | 51778  | MYOZ2    | L  |
| 87 | ACTN1  | 58529  | MYOZ1    | RL |
| 87 | ACTN1  | 117178 | SSX2IP   | L  |
| 87 | ACTN1  | 125950 | RAVER1   | L  |
| 88 | ACTN2  | 89     | ACTN3    | L  |
| 88 | ACTN2  | 135    | ADORA2A  | L  |
| 88 | ACTN2  | 1739   | DLG1     | L  |
| 88 | ACTN2  | 1742   | DLG4     | L  |
| 88 | ACTN2  | 2904   | GRIN2B   | L  |
| 88 | ACTN2  | 3739   | KCNA4    | L  |
| 88 | ACTN2  | 3741   | KCNA5    | L  |
| 88 | ACTN2  | 5585   | PKN1     | L  |
| 88 | ACTN2  | 6401   | SELE     | L  |
| 88 | ACTN2  | 8038   | ADAM12   | L  |
| 88 | ACTN2  | 9124   | PDLIM1   | L  |
| 88 | ACTN2  | 22142  | (null)   | S  |
| 88 | ACTN2  | 23022  | KIAA0992 | L  |
| 88 | ACTN2  | 27185  | DISC1    | L  |
| 88 | ACTN2  | 51778  | MYOZ2    | L  |
| 88 | ACTN2  | 58529  | MYOZ1    | L  |
| 88 | ACTN2  | 84665  | MYPN     | L  |
| 88 | ACTN2  | 117178 | SSX2IP   | L  |
| 88 | ACTN2  | 125950 | RAVER1   | L  |
| 89 | ACTN3  | 135    | ADORA2A  | L  |
| 89 | ACTN3  | 84665  | MYPN     | L  |
| 90 | ACVR1  | 91     | ACVR1B   | L  |
| 90 | ACVR1  | 650    | BMP2     | L  |
| 90 | ACVR1  | 655    | BMP7     | L  |
| 90 | ACVR1  | 2022   | ENG      | L  |
| 90 | ACVR1  | 2339   | FNTA     | L  |
| 90 | ACVR1  | 3547   | IGSF1    | L  |
| 90 | ACVR1  | 3624   | INHBA    | L  |
| 90 | ACVR1  | 3625   | INHBB    | L  |
| 90 | ACVR1  | 3626   | INHBC    | L  |
| 90 | ACVR1  | 4086   | SMAD1    | L  |
| 90 | ACVR1  | 4090   | SMAD5    | L  |
| 90 | ACVR1  | 4093   | SMAD9    | L  |
| 90 | ACVR1  | 8200   | GDF5     | L  |
| 91 | ACVR1B | 92     | ACVR2A   | L  |
| 91 | ACVR1B | 93     | ACVR2B   | L  |
| 91 | ACVR1B | 3547   | IGSF1    | L  |
| 91 | ACVR1B | 3624   | INHBA    | L  |
| 91 | ACVR1B | 3625   | INHBB    | L  |
| 91 | ACVR1B | 3626   | INHBC    | L  |
| 91 | ACVR1B | 4089   | SMAD4    | L  |
| 91 | ACVR1B | 4092   | SMAD7    | L  |
| 91 | ACVR1B | 6642   | SNX1     | L  |
| 91 | ACVR1B | 6997   | TDGF1    | L  |
| 91 | ACVR1B | 9392   | TGFBRAP1 | L  |
| 92 | ACVR2A | 650    | BMP2     | L  |
| 92 | ACVR2A | 654    | BMP6     | L  |
| 92 | ACVR2A | 655    | BMP7     | L  |

|     |         |       |           |   |
|-----|---------|-------|-----------|---|
| 92  | ACVR2A  | 2022  | ENG       | L |
| 92  | ACVR2A  | 2661  | GDF9      | L |
| 92  | ACVR2A  | 3547  | IGSF1     | L |
| 92  | ACVR2A  | 3624  | INHBA     | L |
| 92  | ACVR2A  | 3625  | INHBB     | L |
| 92  | ACVR2A  | 3626  | INHBC     | L |
| 92  | ACVR2A  | 7049  | TGFBR3    | L |
| 92  | ACVR2A  | 8200  | GDF5      | L |
| 93  | ACVR2B  | 655   | BMP7      | L |
| 93  | ACVR2B  | 2660  | GDF8      | L |
| 93  | ACVR2B  | 3547  | IGSF1     | L |
| 93  | ACVR2B  | 3624  | INHBA     | L |
| 93  | ACVR2B  | 3625  | INHBB     | L |
| 93  | ACVR2B  | 3626  | INHBC     | L |
| 93  | ACVR2B  | 6642  | SNX1      | L |
| 93  | ACVR2B  | 6643  | SNX2      | L |
| 93  | ACVR2B  | 8200  | GDF5      | L |
| 93  | ACVR2B  | 9392  | TGFBRAP1  | L |
| 93  | ACVR2B  | 10220 | GDF11     | L |
| 94  | ACVRL1  | 7040  | TGFB1     | L |
| 94  | ACVRL1  | 7048  | TGFBR2    | L |
| 94  | ACVRL1  | 9392  | TGFBRAP1  | L |
| 95  | ACY1    | 7265  | TTC1      | R |
| 100 | ADA     | 134   | ADORA1    | L |
| 100 | ADA     | 135   | ADORA2A   | L |
| 100 | ADA     | 1803  | DPP4      | L |
| 100 | ADA     | 1812  | DRD1      | L |
| 100 | ADA     | 2885  | GRB2      | L |
| 100 | ADA     | 2908  | NR3C1     | L |
| 102 | ADAM10  | 1943  | EFNA2     | L |
| 103 | ADAR    | 7514  | XPO1      | L |
| 107 | ADCY1   | 108   | ADCY2     | L |
| 108 | ADCY2   | 111   | ADCY5     | L |
| 108 | ADCY2   | 2778  | GNAS      | L |
| 111 | ADCY5   | 2770  | GNAI1     | L |
| 111 | ADCY5   | 2778  | GNAS      | L |
| 111 | ADCY5   | 5578  | PRKCA     | L |
| 111 | ADCY5   | 5590  | PRKCZ     | L |
| 111 | ADCY5   | 5997  | RGS2      | L |
| 112 | ADCY6   | 1139  | CHRNA7    | L |
| 116 | ADCYAP1 | 117   | ADCYAP1R1 | L |
| 116 | ADCYAP1 | 6344  | SCTR      | L |
| 116 | ADCYAP1 | 6469  | SHH       | L |
| 116 | ADCYAP1 | 7434  | VIPR2     | L |
| 118 | ADD1    | 119   | ADD2      | L |
| 118 | ADD1    | 801   | CALM1     | L |
| 118 | ADD1    | 3398  | ID2       | L |
| 118 | ADD1    | 6708  | SPTA1     | L |
| 118 | ADD1    | 6709  | SPTAN1    | L |
| 118 | ADD1    | 6710  | SPTB      | L |
| 118 | ADD1    | 10808 | HSPH1     | L |
| 119 | ADD2    | 801   | CALM1     | L |
| 119 | ADD2    | 2534  | FYN       | L |
| 119 | ADD2    | 6709  | SPTAN1    | L |
| 128 | ADH5    | 1107  | CHD3      | S |
| 133 | ADM     | 1906  | EDN1      | L |
| 133 | ADM     | 3075  | CFH       | L |
| 133 | ADM     | 4880  | NPPC      | L |
| 133 | ADM     | 11318 | ADMR      | L |
| 134 | ADORA1  | 1812  | DRD1      | L |
| 134 | ADORA1  | 2037  | EPB41L2   | L |
| 134 | ADORA1  | 2771  | GNAI2     | L |
| 134 | ADORA1  | 2775  | GNAO1     | L |
| 134 | ADORA1  | 2781  | GNAZ      | L |
| 134 | ADORA1  | 2911  | GRM1      | L |
| 134 | ADORA1  | 5028  | P2RY1     | L |
| 135 | ADORA2A | 1813  | DRD2      | L |

|     |        |       |          |   |
|-----|--------|-------|----------|---|
| 142 | PARP1  | 596   | BCL2     | L |
| 142 | PARP1  | 836   | CASP3    | L |
| 142 | PARP1  | 1026  | CDKN1A   | L |
| 142 | PARP1  | 1058  | CENPA    | L |
| 142 | PARP1  | 1059  | CENPB    | L |
| 142 | PARP1  | 4605  | MYBL2    | L |
| 142 | PARP1  | 4790  | NFKB1    | L |
| 142 | PARP1  | 5111  | PCNA     | L |
| 142 | PARP1  | 5422  | POLA     | L |
| 142 | PARP1  | 5451  | POU2F1   | L |
| 142 | PARP1  | 5970  | RELA     | L |
| 142 | PARP1  | 6189  | RPS3A    | L |
| 142 | PARP1  | 6256  | RXRA     | L |
| 142 | PARP1  | 7157  | TP53     | L |
| 142 | PARP1  | 7515  | XRCC1    | L |
| 142 | PARP1  | 9184  | BUB3     | L |
| 142 | PARP1  | 10038 | PARP2    | L |
| 142 | PARP1  | 10039 | PARP3    | L |
| 142 | PARP1  | 10432 | RBM14    | L |
| 142 | PARP1  | 23090 | ZNF423   | L |
| 142 | PARP1  | 23649 | POLA2    | L |
| 142 | PARP1  | 54840 | APTX     | L |
| 143 | PARP4  | 9961  | MVP      | L |
| 147 | ADRA1B | 1173  | AP2M1    | L |
| 147 | ADRA1B | 2767  | GNA11    | L |
| 147 | ADRA1B | 6295  | SAG      | L |
| 148 | ADRA1A | 84687 | PPP1R9B  | L |
| 150 | ADRA2A | 153   | ADRB1    | L |
| 150 | ADRA2A | 1967  | EIF2B1   | L |
| 150 | ADRA2A | 2770  | GNAI1    | L |
| 150 | ADRA2A | 2775  | GNAO1    | L |
| 150 | ADRA2A | 7534  | YWHAZ    | L |
| 151 | ADRA2B | 1967  | EIF2B1   | L |
| 151 | ADRA2B | 2771  | GNAI2    | L |
| 151 | ADRA2B | 7534  | YWHAZ    | L |
| 152 | ADRA2C | 1967  | EIF2B1   | L |
| 152 | ADRA2C | 2775  | GNAO1    | L |
| 152 | ADRA2C | 7534  | YWHAZ    | L |
| 153 | ADRB1  | 408   | ARRB1    | L |
| 153 | ADRB1  | 1742  | DLG4     | L |
| 153 | ADRB1  | 2885  | GRB2     | L |
| 153 | ADRB1  | 10755 | GIPC1    | L |
| 154 | ADRB2  | 407   | ARR3     | L |
| 154 | ADRB2  | 1967  | EIF2B1   | L |
| 154 | ADRB2  | 2767  | GNA11    | L |
| 154 | ADRB2  | 2769  | GNA15    | L |
| 154 | ADRB2  | 2870  | GRK6     | L |
| 154 | ADRB2  | 2885  | GRB2     | L |
| 154 | ADRB2  | 3763  | KCNJ6    | L |
| 154 | ADRB2  | 3765  | KCNJ9    | L |
| 154 | ADRB2  | 4985  | OPRD1    | L |
| 154 | ADRB2  | 5578  | PRKCA    | L |
| 154 | ADRB2  | 9351  | SLC9A3R2 | L |
| 154 | ADRB2  | 9368  | SLC9A3R1 | L |
| 154 | ADRB2  | 9495  | AKAP5    | L |
| 154 | ADRB2  | 9630  | GNA14    | L |
| 155 | ADRB3  | 2778  | GNAS     | L |
| 155 | ADRB3  | 6714  | SRC      | L |
| 156 | ADRBK1 | 408   | ARRB1    | L |
| 156 | ADRBK1 | 857   | CAV1     | L |
| 156 | ADRBK1 | 1233  | CCR4     | L |
| 156 | ADRBK1 | 2492  | FSHR     | L |
| 156 | ADRBK1 | 2776  | GNAQ     | L |
| 156 | ADRBK1 | 5037  | PBP      | L |
| 156 | ADRBK1 | 5082  | PDCL     | L |
| 156 | ADRBK1 | 5132  | PDC      | L |
| 156 | ADRBK1 | 5579  | PRKCB1   | L |

|     |        |        |           |    |
|-----|--------|--------|-----------|----|
| 156 | ADRBK1 | 5957   | RCV1      | L  |
| 156 | ADRBK1 | 6010   | RHO       | L  |
| 156 | ADRBK1 | 6714   | SRC       | L  |
| 156 | ADRBK1 | 9815   | GIT2      | L  |
| 156 | ADRBK1 | 23413  | FREQ      | L  |
| 156 | ADRBK1 | 28964  | GIT1      | L  |
| 157 | ADRBK2 | 1233   | CCR4      | L  |
| 157 | ADRBK2 | 7852   | CXCR4     | L  |
| 157 | ADRBK2 | 28964  | GIT1      | L  |
| 160 | AP2A1  | 274    | BIN1      | L  |
| 160 | AP2A1  | 1175   | AP2S1     | L  |
| 160 | AP2A1  | 2060   | EPS15     | L  |
| 160 | AP2A1  | 2690   | GHR       | L  |
| 160 | AP2A1  | 3092   | HIP1      | L  |
| 160 | AP2A1  | 4093   | SMAD9     | L  |
| 160 | AP2A1  | 6016   | RIT1      | S  |
| 160 | AP2A1  | 6464   | SHC1      | L  |
| 160 | AP2A1  | 7913   | DEK       | L  |
| 160 | AP2A1  | 8301   | PICALM    | L  |
| 160 | AP2A1  | 9685   | ENTH      | L  |
| 160 | AP2A1  | 22841  | RAB11FIP2 | L  |
| 160 | AP2A1  | 84258  | SYT3      | L  |
| 160 | AP2A1  | 114034 | TOE1      | S  |
| 161 | AP2A2  | 163    | AP2B1     | L  |
| 161 | AP2A2  | 2060   | EPS15     | L  |
| 161 | AP2A2  | 3064   | HD        | L  |
| 161 | AP2A2  | 4086   | SMAD1     | L  |
| 161 | AP2A2  | 6464   | SHC1      | L  |
| 162 | AP1B1  | 164    | AP1G1     | L  |
| 162 | AP1B1  | 375    | ARF1      | L  |
| 162 | AP1B1  | 381    | ARF5      | L  |
| 162 | AP1B1  | 382    | ARF6      | L  |
| 162 | AP1B1  | 409    | ARRB2     | L  |
| 162 | AP1B1  | 699    | BUB1      | L  |
| 162 | AP1B1  | 701    | BUB1B     | L  |
| 162 | AP1B1  | 1213   | CLTC      | L  |
| 162 | AP1B1  | 4087   | SMAD2     | L  |
| 162 | AP1B1  | 10053  | AP1M2     | L  |
| 162 | AP1B1  | 23523  | CABIN1    | L  |
| 162 | AP1B1  | 55729  | ATF7IP    | L  |
| 162 | AP1B1  | 63971  | KIF13A    | L  |
| 163 | AP2B1  | 701    | BUB1B     | L  |
| 163 | AP2B1  | 1173   | AP2M1     | RL |
| 163 | AP2B1  | 1175   | AP2S1     | L  |
| 163 | AP2B1  | 4201   | MEA1      | R  |
| 163 | AP2B1  | 4292   | MLH1      | R  |
| 163 | AP2B1  | 7046   | TGFBR1    | L  |
| 163 | AP2B1  | 8907   | AP1M1     | R  |
| 163 | AP2B1  | 9550   | ATP6V1G1  | R  |
| 163 | AP2B1  | 9685   | ENTH      | L  |
| 163 | AP2B1  | 9729   | KIAA0408  | R  |
| 163 | AP2B1  | 9883   | POM121    | R  |
| 163 | AP2B1  | 10053  | AP1M2     | RL |
| 163 | AP2B1  | 26119  | LDLRAP1   | R  |
| 163 | AP2B1  | 26150  | RIBC2     | R  |
| 163 | AP2B1  | 27229  | 76P       | R  |
| 163 | AP2B1  | 53371  | NUP54     | R  |
| 163 | AP2B1  | 54386  | TERF2IP   | R  |
| 163 | AP2B1  | 54855  | FAM46C    | R  |
| 163 | AP2B1  | 55145  | THAP1     | R  |
| 163 | AP2B1  | 55707  | NECAP2    | R  |
| 163 | AP2B1  | 79132  | LGP2      | R  |
| 164 | AP1G1  | 375    | ARF1      | L  |
| 164 | AP1G1  | 1174   | AP1S1     | L  |
| 164 | AP1G1  | 1213   | CLTC      | L  |
| 164 | AP1G1  | 4130   | MAP1A     | L  |
| 164 | AP1G1  | 6710   | SPTB      | L  |



|     |        |       |            |   |
|-----|--------|-------|------------|---|
| 164 | AP1G1  | 8905  | AP1S2      | L |
| 164 | AP1G1  | 9135  | RABEP1     | L |
| 164 | AP1G1  | 9685  | ENTH       | L |
| 164 | AP1G1  | 10053 | AP1M2      | L |
| 164 | AP1G1  | 11276 | AP1GBP1    | L |
| 164 | AP1G1  | 54812 | AFTIPHILIN | L |
| 164 | AP1G1  | 57473 | GM632      | L |
| 164 | AP1G1  | 63971 | KIF13A     | L |
| 164 | AP1G1  | 92737 | DNER       | L |
| 165 | AEBP1  | 6929  | TCF3       | L |
| 166 | AES    | 367   | AR         | L |
| 166 | AES    | 2960  | GTF2E1     | L |
| 166 | AES    | 3146  | HMGB1      | L |
| 166 | AES    | 4990  | SIX6       | L |
| 166 | AES    | 5970  | RELA       | L |
| 166 | AES    | 6142  | RPL18A     | S |
| 166 | AES    | 6354  | CCL7       | S |
| 166 | AES    | 6457  | SH3GL3     | S |
| 166 | AES    | 6495  | SIX1       | L |
| 166 | AES    | 6496  | SIX3       | L |
| 166 | AES    | 9627  | SNCAIP     | S |
| 166 | AES    | 10736 | SIX2       | L |
| 166 | AES    | 11337 | GABARAP    | S |
| 166 | AES    | 51003 | MED31      | S |
| 166 | AES    | 51651 | BIT1       | L |
| 174 | AFP    | 1234  | CCR5       | L |
| 174 | AFP    | 9905  | RUTBC1     | S |
| 175 | AGA    | 3482  | IGF2R      | L |
| 176 | AGC1   | 1404  | HAPLN1     | L |
| 176 | AGC1   | 2192  | FBLN1      | L |
| 176 | AGC1   | 2199  | FBLN2      | L |
| 176 | AGC1   | 7130  | TNFAIP6    | L |
| 176 | AGC1   | 7143  | TNR        | L |
| 177 | AGER   | 3146  | HMGB1      | L |
| 177 | AGER   | 6271  | S100A1     | L |
| 177 | AGER   | 6283  | S100A12    | L |
| 177 | AGER   | 6285  | S100B      | L |
| 177 | AGER   | 6286  | S100P      | L |
| 177 | AGER   | 55140 | ELP3       | L |
| 181 | AGRP   | 4159  | MC3R       | L |
| 181 | AGRP   | 4160  | MC4R       | L |
| 181 | AGRP   | 4161  | MC5R       | L |
| 181 | AGRP   | 51738 | GHRL       | L |
| 182 | JAG1   | 4242  | MFNG       | L |
| 182 | JAG1   | 4301  | MLLT4      | L |
| 182 | JAG1   | 4851  | NOTCH1     | L |
| 182 | JAG1   | 4853  | NOTCH2     | L |
| 182 | JAG1   | 4854  | NOTCH3     | L |
| 183 | AGT    | 185   | AGTR1      | L |
| 183 | AGT    | 186   | AGTR2      | L |
| 183 | AGT    | 2130  | EWSR1      | R |
| 183 | AGT    | 4142  | MAS1       | L |
| 183 | AGT    | 4224  | MEP1A      | L |
| 183 | AGT    | 5553  | PRG2       | L |
| 183 | AGT    | 23549 | DNPEP      | L |
| 185 | AGTR1  | 624   | BDKRB2     | L |
| 185 | AGTR1  | 3717  | JAK2       | L |
| 185 | AGTR1  | 5868  | RAB5A      | L |
| 186 | AGTR2  | 7704  | ZBTB16     | L |
| 186 | AGTR2  | 57509 | MTUS1      | L |
| 187 | AGTRL1 | 8862  | APLN       | L |
| 189 | AGXT   | 9627  | SNCAIP     | S |
| 190 | NR0B1  | 367   | AR         | L |
| 190 | NR0B1  | 6720  | SREBF1     | L |
| 190 | NR0B1  | 9318  | COPS2      | L |
| 196 | AHR    | 405   | ARNT       | L |
| 196 | AHR    | 406   | ARNTL      | L |

|     |      |       |          |   |
|-----|------|-------|----------|---|
| 196 | AHR  | 904   | CCNT1    | L |
| 196 | AHR  | 2099  | ESR1     | L |
| 196 | AHR  | 2963  | GTF2F2   | L |
| 196 | AHR  | 3320  | HSPCA    | L |
| 196 | AHR  | 4738  | NEDD8    | L |
| 196 | AHR  | 5925  | RB1      | L |
| 196 | AHR  | 5970  | RELA     | L |
| 196 | AHR  | 6597  | SMARCA4  | L |
| 196 | AHR  | 6667  | SP1      | L |
| 196 | AHR  | 6908  | TBP      | L |
| 196 | AHR  | 7025  | NR2F1    | L |
| 196 | AHR  | 7514  | XPO1     | L |
| 196 | AHR  | 7818  | DAP3     | L |
| 196 | AHR  | 8204  | NRIP1    | L |
| 196 | AHR  | 8648  | NCOA1    | L |
| 196 | AHR  | 9049  | AIP      | L |
| 196 | AHR  | 10728 | PTGES3   | L |
| 197 | AHSG | 1634  | DCN      | L |
| 197 | AHSG | 3643  | INSR     | L |
| 197 | AHSG | 22800 | RRAS2    | L |
| 197 | AHSG | 26232 | FBXO2    | L |
| 203 | AK1  | 2274  | FHL2     | L |
| 207 | AKT1 | 673   | BRAF     | L |
| 207 | AKT1 | 1147  | CHUK     | L |
| 207 | AKT1 | 1326  | MAP3K8   | L |
| 207 | AKT1 | 2475  | FRAP1    | L |
| 207 | AKT1 | 2887  | GRB10    | L |
| 207 | AKT1 | 3064  | HD       | L |
| 207 | AKT1 | 3164  | NR4A1    | L |
| 207 | AKT1 | 3320  | HSPCA    | L |
| 207 | AKT1 | 3611  | ILK      | L |
| 207 | AKT1 | 3615  | IMPDH2   | L |
| 207 | AKT1 | 3654  | IRAK1    | L |
| 207 | AKT1 | 3667  | IRS1     | L |
| 207 | AKT1 | 3858  | KRT10    | L |
| 207 | AKT1 | 4193  | MDM2     | L |
| 207 | AKT1 | 4296  | MAP3K11  | L |
| 207 | AKT1 | 4303  | MLLT7    | L |
| 207 | AKT1 | 4515  | MTCP1    | L |
| 207 | AKT1 | 4687  | NCF1     | L |
| 207 | AKT1 | 5170  | PDPK1    | L |
| 207 | AKT1 | 5586  | PKN2     | L |
| 207 | AKT1 | 5588  | PRKCQ    | L |
| 207 | AKT1 | 5590  | PRKCZ    | L |
| 207 | AKT1 | 5770  | PTPN1    | L |
| 207 | AKT1 | 5894  | RAF1     | L |
| 207 | AKT1 | 6198  | RPS6KB1  | L |
| 207 | AKT1 | 6416  | MAP2K4   | L |
| 207 | AKT1 | 7248  | TSC1     | L |
| 207 | AKT1 | 7249  | TSC2     | L |
| 207 | AKT1 | 7534  | YWHAZ    | L |
| 207 | AKT1 | 8115  | TCL1A    | L |
| 207 | AKT1 | 8600  | TNFSF11  | L |
| 207 | AKT1 | 8682  | PEA15    | L |
| 207 | AKT1 | 9479  | MAPK8IP1 | L |
| 207 | AKT1 | 9623  | TCL1B    | L |
| 207 | AKT1 | 9846  | GAB2     | L |
| 207 | AKT1 | 27004 | TCL6     | L |
| 207 | AKT1 | 57761 | TRIB3    | L |
| 207 | AKT1 | 64400 | FTS      | L |
| 208 | AKT2 | 1147  | CHUK     | L |
| 208 | AKT2 | 2932  | GSK3B    | L |
| 208 | AKT2 | 4515  | MTCP1    | L |
| 208 | AKT2 | 6517  | SLC2A4   | L |
| 208 | AKT2 | 8115  | TCL1A    | L |
| 208 | AKT2 | 9623  | TCL1B    | L |
| 208 | AKT2 | 26060 | APPL     | L |

|     |         |       |          |   |
|-----|---------|-------|----------|---|
| 208 | AKT2    | 57761 | TRIB3    | L |
| 212 | ALAS2   | 8803  | SUCLA2   | L |
| 213 | ALB     | 259   | AMBP     | L |
| 213 | ALB     | 348   | APOE     | L |
| 213 | ALB     | 1409  | CRYAA    | L |
| 213 | ALB     | 2217  | FCGRT    | L |
| 213 | ALB     | 4036  | LRP2     | L |
| 213 | ALB     | 5004  | ORM1     | L |
| 213 | ALB     | 5444  | PON1     | L |
| 213 | ALB     | 5552  | PRG1     | L |
| 213 | ALB     | 5950  | RBP4     | L |
| 213 | ALB     | 6927  | TCF1     | L |
| 213 | ALB     | 8029  | CUBN     | L |
| 213 | ALB     | 51631 | LUC7L2   | S |
| 214 | ALCAM   | 923   | CD6      | L |
| 215 | ABCD1   | 225   | ABCD2    | L |
| 215 | ABCD1   | 5824  | PEX19    | L |
| 215 | ABCD1   | 5825  | ABCD3    | L |
| 217 | ALDH2   | 1400  | CRMP1    | S |
| 217 | ALDH2   | 3329  | HSPD1    | L |
| 217 | ALDH2   | 3336  | HSPE1    | L |
| 217 | ALDH2   | 3692  | ITGB4BP  | S |
| 217 | ALDH2   | 9094  | UNC119   | S |
| 217 | ALDH2   | 11161 | C14orf1  | S |
| 217 | ALDH2   | 54978 | C2orf18  | S |
| 217 | ALDH2   | 55855 | FAM45B   | S |
| 217 | ALDH2   | 84966 | IGSF21   | S |
| 225 | ABCD2   | 5824  | PEX19    | L |
| 225 | ABCD2   | 5825  | ABCD3    | L |
| 226 | ALDOA   | 529   | ATP6V1E1 | L |
| 226 | ALDOA   | 2820  | GPD2     | L |
| 226 | ALDOA   | 5338  | PLD2     | L |
| 226 | ALDOA   | 8655  | DNCL1    | L |
| 226 | ALDOA   | 54464 | XRN1     | L |
| 229 | ALDOB   | 529   | ATP6V1E1 | L |
| 230 | ALDOC   | 5338  | PLD2     | L |
| 231 | AKR1B1  | 4086  | SMAD1    | L |
| 238 | ALK     | 3320  | HSPCA    | L |
| 238 | ALK     | 3667  | IRS1     | L |
| 238 | ALK     | 3718  | JAK3     | L |
| 238 | ALK     | 5335  | PLCG1    | L |
| 238 | ALK     | 5764  | PTN      | L |
| 238 | ALK     | 5921  | RASA1    | L |
| 238 | ALK     | 6464  | SHC1     | L |
| 238 | ALK     | 51530 | ZC3HC1   | L |
| 239 | ALOX12  | 3691  | ITGB4    | L |
| 239 | ALOX12  | 3852  | KRT5     | L |
| 239 | ALOX12  | 4000  | LMNA     | L |
| 240 | ALOX5   | 241   | ALOX5AP  | L |
| 240 | ALOX5   | 2885  | GRB2     | L |
| 240 | ALOX5   | 9392  | TGFBRAP1 | L |
| 240 | ALOX5   | 23406 | COTL1    | L |
| 242 | ALOX12B | 3852  | KRT5     | L |
| 242 | ALOX12B | 4000  | LMNA     | L |
| 250 | ALPP    | 2822  | GPLD1    | L |
| 250 | ALPP    | 10026 | PIGK     | L |
| 259 | AMBP    | 2147  | F2       | L |
| 259 | AMBP    | 2335  | FN1      | L |
| 267 | AMFR    | 7322  | UBE2D2   | L |
| 267 | AMFR    | 7327  | UBE2G2   | L |
| 268 | AMH     | 269   | AMHR2    | L |
| 268 | AMH     | 1956  | EGFR     | L |
| 268 | AMH     | 5125  | PCSK5    | L |
| 270 | AMPD1   | 4620  | MYH2     | L |
| 273 | AMPH    | 274   | BIN1     | L |
| 273 | AMPH    | 1213  | CLTC     | L |
| 273 | AMPH    | 1759  | DNM1     | L |

|     |         |       |           |   |
|-----|---------|-------|-----------|---|
| 273 | AMPH    | 5338  | PLD2      | L |
| 273 | AMPH    | 6853  | SYN1      | L |
| 273 | AMPH    | 7448  | VTN       | L |
| 273 | AMPH    | 8851  | CDK5R1    | L |
| 273 | AMPH    | 23523 | CABIN1    | L |
| 274 | BIN1    | 1523  | CUTL1     | S |
| 274 | BIN1    | 1759  | DNM1      | L |
| 274 | BIN1    | 3672  | ITGA1     | L |
| 274 | BIN1    | 3675  | ITGA3     | L |
| 274 | BIN1    | 5338  | PLD2      | L |
| 274 | BIN1    | 5747  | PTK2      | L |
| 274 | BIN1    | 6456  | SH3GL2    | L |
| 274 | BIN1    | 6853  | SYN1      | L |
| 274 | BIN1    | 8491  | MAP4K3    | L |
| 274 | BIN1    | 8723  | SNX4      | L |
| 274 | BIN1    | 8867  | SYNJ1     | L |
| 274 | BIN1    | 79890 | RIN3      | L |
| 276 | AMY1A   | 10270 | AKAP8     | L |
| 279 | AMY2A   | 2813  | GP2       | L |
| 283 | ANG     | 537   | ATP6AP1   | S |
| 283 | ANG     | 944   | TNFSF8    | L |
| 283 | ANG     | 5728  | PTEN      | S |
| 283 | ANG     | 6050  | RNH1      | L |
| 283 | ANG     | 6997  | TDGF1     | S |
| 284 | ANGPT1  | 285   | ANGPT2    | L |
| 284 | ANGPT1  | 7010  | TEK       | L |
| 285 | ANGPT2  | 7010  | TEK       | L |
| 286 | ANK1    | 3897  | L1CAM     | L |
| 286 | ANK1    | 6005  | RHAG      | L |
| 286 | ANK1    | 6508  | SLC4A3    | L |
| 286 | ANK1    | 6521  | SLC4A1    | L |
| 286 | ANK1    | 6709  | SPTAN1    | L |
| 286 | ANK1    | 7074  | TIAM1     | L |
| 286 | ANK1    | 7273  | TTN       | L |
| 286 | ANK1    | 84033 | OBSCN     | L |
| 286 | ANK1    | 84224 | AE2       | L |
| 287 | ANK2    | 3897  | L1CAM     | L |
| 287 | ANK2    | 4897  | NRCAM     | L |
| 287 | ANK2    | 10280 | OPRS1     | L |
| 288 | ANK3    | 4087  | SMAD2     | L |
| 288 | ANK3    | 4088  | SMAD3     | L |
| 288 | ANK3    | 6324  | SCN1B     | L |
| 291 | SLC25A4 | 367   | AR        | L |
| 291 | SLC25A4 | 581   | BAX       | L |
| 291 | SLC25A4 | 2908  | NR3C1     | L |
| 292 | SLC25A5 | 1159  | CKMT1B    | L |
| 292 | SLC25A5 | 5829  | PXN       | L |
| 292 | SLC25A5 | 7414  | VCL       | L |
| 293 | SLC25A6 | 1114  | CHGB      | S |
| 293 | SLC25A6 | 2261  | FGFR3     | S |
| 293 | SLC25A6 | 3735  | KARS      | S |
| 293 | SLC25A6 | 5359  | PLSCR1    | R |
| 293 | SLC25A6 | 7431  | VIM       | S |
| 293 | SLC25A6 | 11098 | PRSS23    | S |
| 293 | SLC25A6 | 29888 | STRN4     | S |
| 293 | SLC25A6 | 83755 | KRTAP4-12 | R |
| 301 | ANXA1   | 2357  | FPR1      | L |
| 301 | ANXA1   | 3856  | KRT8      | L |
| 301 | ANXA1   | 6282  | S100A11   | L |
| 301 | ANXA1   | 7052  | TGM2      | L |
| 302 | ANXA2   | 350   | APOH      | L |
| 302 | ANXA2   | 634   | CEACAM1   | L |
| 302 | ANXA2   | 1508  | CTSB      | L |
| 302 | ANXA2   | 2885  | GRB2      | L |
| 302 | ANXA2   | 5111  | PCNA      | L |
| 302 | ANXA2   | 5245  | PHB       | L |
| 302 | ANXA2   | 5327  | PLAT      | L |

|     |        |        |         |   |
|-----|--------|--------|---------|---|
| 302 | ANXA2  | 5340   | PLG     | L |
| 302 | ANXA2  | 5829   | PXN     | L |
| 302 | ANXA2  | 6277   | S100A6  | L |
| 302 | ANXA2  | 6281   | S100A10 | L |
| 302 | ANXA2  | 6714   | SRC     | L |
| 302 | ANXA2  | 7414   | VCL     | L |
| 302 | ANXA2  | 10434  | LYPLA1  | L |
| 302 | ANXA2  | 51365  | PLA1A   | L |
| 306 | ANXA3  | 7157   | TP53    | S |
| 306 | ANXA3  | 9094   | UNC119  | S |
| 306 | ANXA3  | 10436  | C2F     | S |
| 306 | ANXA3  | 84966  | IGSF21  | S |
| 306 | ANXA3  | 197131 | UBR1    | S |
| 307 | ANXA4  | 2813   | GP2     | L |
| 308 | ANXA5  | 1280   | COL2A1  | L |
| 308 | ANXA5  | 1300   | COL10A1 | L |
| 308 | ANXA5  | 1981   | EIF4G1  | S |
| 308 | ANXA5  | 2222   | FDFT1   | S |
| 308 | ANXA5  | 3693   | ITGB5   | L |
| 308 | ANXA5  | 3791   | KDR     | L |
| 308 | ANXA5  | 6827   | SUPT4H1 | S |
| 308 | ANXA5  | 8726   | EED     | L |
| 309 | ANXA6  | 1380   | CR2     | L |
| 309 | ANXA6  | 5921   | RASA1   | L |
| 309 | ANXA6  | 6271   | S100A1  | L |
| 309 | ANXA6  | 6285   | S100B   | L |
| 309 | ANXA6  | 79577  | CDC73   | S |
| 310 | ANXA7  | 6281   | S100A10 | L |
| 310 | ANXA7  | 6717   | SRI     | L |
| 311 | ANXA11 | 2026   | ENO2    | S |
| 311 | ANXA11 | 3189   | HNRPH3  | S |
| 311 | ANXA11 | 5359   | PLSCR1  | R |
| 311 | ANXA11 | 6277   | S100A6  | L |
| 311 | ANXA11 | 6717   | SRI     | L |
| 311 | ANXA11 | 10016  | PDCD6   | L |
| 312 | ANXA13 | 4734   | NEDD4   | L |
| 317 | APAF1  | 598    | BCL2L1  | L |
| 317 | APAF1  | 837    | CASP4   | L |
| 317 | APAF1  | 841    | CASP8   | L |
| 317 | APAF1  | 842    | CASP9   | L |
| 317 | APAF1  | 3303   | HSPA1A  | L |
| 317 | APAF1  | 54205  | CYCS    | L |
| 317 | APAF1  | 57099  | AVEN    | L |
| 319 | APOF   | 335    | APOA1   | L |
| 319 | APOF   | 336    | APOA2   | L |
| 320 | APBA1  | 351    | APP     | L |
| 320 | APBA1  | 774    | CACNA1B | L |
| 320 | APBA1  | 3358   | HTR2C   | L |
| 320 | APBA1  | 3768   | KCNJ12  | L |
| 320 | APBA1  | 5663   | PSEN1   | L |
| 320 | APBA1  | 6804   | STX1A   | L |
| 320 | APBA1  | 6812   | STXBP1  | L |
| 320 | APBA1  | 8573   | CASK    | L |
| 320 | APBA1  | 9973   | CCS     | L |
| 320 | APBA1  | 57576  | KIF17   | L |
| 320 | APBA1  | 64130  | LIN7B   | L |
| 320 | APBA1  | 79937  | CNTNAP3 | L |
| 321 | APBA2  | 351    | APP     | L |
| 321 | APBA2  | 4035   | LRP1    | L |
| 321 | APBA2  | 4036   | LRP2    | L |
| 321 | APBA2  | 5970   | RELA    | L |
| 321 | APBA2  | 22883  | CLSTN1  | L |
| 321 | APBA2  | 63941  | APBA2BP | L |
| 322 | APBB1  | 333    | APLP1   | L |
| 322 | APBB1  | 351    | APP     | L |
| 322 | APBB1  | 356    | FASLG   | L |
| 322 | APBB1  | 4035   | LRP1    | L |

|     |       |       |          |   |
|-----|-------|-------|----------|---|
| 322 | APBB1 | 7024  | TFCP2    | L |
| 322 | APBB1 | 10524 | HTATIP   | L |
| 322 | APBB1 | 22883 | CLSTN1   | L |
| 322 | APBB1 | 51466 | EVL      | L |
| 323 | APBB2 | 334   | APLP2    | L |
| 323 | APBB2 | 351   | APP      | L |
| 324 | APC   | 699   | BUB1     | L |
| 324 | APC   | 991   | CDC20    | L |
| 324 | APC   | 1499  | CTNNB1   | L |
| 324 | APC   | 3728  | JUP      | L |
| 324 | APC   | 4085  | MAD2L1   | L |
| 324 | APC   | 5525  | PPP2R5A  | L |
| 324 | APC   | 5747  | PTK2     | L |
| 324 | APC   | 6101  | RP1      | L |
| 324 | APC   | 6477  | SIAH1    | L |
| 324 | APC   | 8312  | AXIN1    | L |
| 324 | APC   | 8313  | AXIN2    | L |
| 324 | APC   | 9229  | DLGAP1   | L |
| 324 | APC   | 22919 | MAPRE1   | L |
| 324 | APC   | 22920 | KIFAP3   | L |
| 324 | APC   | 50649 | ARHGEF4  | L |
| 325 | APCS  | 712   | C1QA     | L |
| 325 | APCS  | 722   | C4BPA    | L |
| 325 | APCS  | 813   | CALU     | L |
| 325 | APCS  | 1401  | CRP      | L |
| 325 | APCS  | 2209  | FCGR1A   | L |
| 325 | APCS  | 2213  | FCGR2B   | L |
| 325 | APCS  | 2214  | FCGR3A   | L |
| 325 | APCS  | 2215  | FCGR3B   | L |
| 325 | APCS  | 2335  | FN1      | L |
| 325 | APCS  | 7038  | TG       | L |
| 326 | AIRE  | 1387  | CREBBP   | L |
| 327 | APEH  | 9798  | KIAA0174 | R |
| 327 | APEH  | 79876 | UBE1DC1  | R |
| 327 | APEH  | 80021 | TMEM62   | S |
| 328 | APEX1 | 1639  | DCTN1    | L |
| 328 | APEX1 | 2237  | FEN1     | L |
| 328 | APEX1 | 2547  | XRCC6    | L |
| 328 | APEX1 | 3091  | HIF1A    | L |
| 328 | APEX1 | 3148  | HMGB2    | L |
| 328 | APEX1 | 3191  | HNRPL    | L |
| 328 | APEX1 | 3303  | HSPA1A   | L |
| 328 | APEX1 | 4595  | MUTYH    | L |
| 328 | APEX1 | 4830  | NME1     | L |
| 328 | APEX1 | 5111  | PCNA     | L |
| 328 | APEX1 | 5423  | POLB     | L |
| 328 | APEX1 | 6418  | SET      | L |
| 328 | APEX1 | 7157  | TP53     | L |
| 328 | APEX1 | 7295  | TXN      | L |
| 328 | APEX1 | 7329  | UBE2I    | L |
| 328 | APEX1 | 7515  | XRCC1    | L |
| 329 | BIRC2 | 836   | CASP3    | L |
| 329 | BIRC2 | 840   | CASP7    | L |
| 329 | BIRC2 | 842   | CASP9    | L |
| 329 | BIRC2 | 2935  | GSPT1    | L |
| 329 | BIRC2 | 3728  | JUP      | R |
| 329 | BIRC2 | 4055  | LTBR     | L |
| 329 | BIRC2 | 4110  | MAGEA11  | R |
| 329 | BIRC2 | 7185  | TRAF1    | L |
| 329 | BIRC2 | 7186  | TRAF2    | R |
| 329 | BIRC2 | 8717  | TRADD    | L |
| 329 | BIRC2 | 8767  | RIPK2    | L |
| 329 | BIRC2 | 27429 | HTRA2    | L |
| 330 | BIRC3 | 836   | CASP3    | L |
| 330 | BIRC3 | 840   | CASP7    | L |
| 330 | BIRC3 | 842   | CASP9    | L |
| 330 | BIRC3 | 2935  | GSPT1    | L |

|     |       |        |           |    |
|-----|-------|--------|-----------|----|
| 330 | BIRC3 | 7185   | TRAF1     | L  |
| 330 | BIRC3 | 7186   | TRAF2     | L  |
| 330 | BIRC3 | 56616  | DIABLO    | L  |
| 331 | BIRC4 | 836    | CASP3     | L  |
| 331 | BIRC4 | 840    | CASP7     | L  |
| 331 | BIRC4 | 842    | CASP9     | RL |
| 331 | BIRC4 | 2935   | GSPT1     | L  |
| 331 | BIRC4 | 6885   | MAP3K7    | L  |
| 331 | BIRC4 | 7189   | TRAF6     | L  |
| 331 | BIRC4 | 9500   | MAGED1    | L  |
| 331 | BIRC4 | 10454  | MAP3K7IP1 | L  |
| 331 | BIRC4 | 23118  | MAP3K7IP2 | L  |
| 331 | BIRC4 | 27429  | HTRA2     | L  |
| 331 | BIRC4 | 54739  | BIRC4BP   | L  |
| 331 | BIRC4 | 55093  | C8orf32   | R  |
| 331 | BIRC4 | 55437  | ALS2CR2   | L  |
| 331 | BIRC4 | 56616  | DIABLO    | L  |
| 331 | BIRC4 | 140735 | Dic2      | R  |
| 331 | BIRC4 | 150684 | COMMD1    | L  |
| 332 | BIRC5 | 836    | CASP3     | L  |
| 332 | BIRC5 | 840    | CASP7     | L  |
| 332 | BIRC5 | 842    | CASP9     | L  |
| 332 | BIRC5 | 983    | CDC2      | L  |
| 332 | BIRC5 | 1019   | CDK4      | L  |
| 332 | BIRC5 | 3619   | INCENP    | L  |
| 332 | BIRC5 | 56616  | DIABLO    | L  |
| 333 | APLP1 | 1031   | CDKN2C    | S  |
| 333 | APLP1 | 1600   | DAB1      | L  |
| 333 | APLP1 | 2948   | GSTM4     | S  |
| 333 | APLP1 | 3117   | HLA-DQA1  | S  |
| 333 | APLP1 | 3336   | HSPE1     | S  |
| 333 | APLP1 | 4666   | NACA      | S  |
| 333 | APLP1 | 4860   | NP        | S  |
| 333 | APLP1 | 6303   | SAT       | S  |
| 333 | APLP1 | 6811   | STX5A     | S  |
| 333 | APLP1 | 6943   | TCF21     | S  |
| 333 | APLP1 | 7083   | TK1       | S  |
| 333 | APLP1 | 7572   | ZNF24     | S  |
| 333 | APLP1 | 8848   | TSC22D1   | S  |
| 333 | APLP1 | 8894   | EIF2S2    | S  |
| 333 | APLP1 | 10200  | MPHOSPH6  | S  |
| 333 | APLP1 | 10813  | UTP14A    | S  |
| 333 | APLP1 | 19241  | (null)    | S  |
| 333 | APLP1 | 54544  | C1orf42   | S  |
| 333 | APLP1 | 55274  | PHF10     | S  |
| 333 | APLP1 | 56144  | PCDHA4    | S  |
| 333 | APLP1 | 114034 | TOE1      | S  |
| 334 | APLP2 | 1600   | DAB1      | L  |
| 334 | APLP2 | 10307  | APBB3     | L  |
| 334 | APLP2 | 57473  | GM632     | L  |
| 335 | APOA1 | 506    | ATP5B     | L  |
| 335 | APOA1 | 949    | SCARB1    | L  |
| 335 | APOA1 | 1071   | CETP      | L  |
| 335 | APOA1 | 3078   | CFHL1     | L  |
| 335 | APOA1 | 3250   | HPR       | L  |
| 335 | APOA1 | 3931   | LCAT      | L  |
| 335 | APOA1 | 5110   | PCMT1     | S  |
| 335 | APOA1 | 8542   | APOL1     | L  |
| 335 | APOA1 | 8794   | TNFRSF10C | S  |
| 335 | APOA1 | 9804   | TOMM20    | S  |
| 335 | APOA1 | 55700  | RPRC1     | S  |
| 336 | APOA2 | 341    | APOC1     | L  |
| 336 | APOA2 | 347    | APOD      | L  |
| 336 | APOA2 | 720    | C4A       | L  |
| 336 | APOA2 | 5360   | PLTP      | L  |
| 337 | APOA4 | 2822   | GPLD1     | L  |
| 338 | APOB  | 633    | BGN       | L  |

|     |         |       |         |   |
|-----|---------|-------|---------|---|
| 338 | APOB    | 811   | CALR    | L |
| 338 | APOB    | 821   | CANX    | L |
| 338 | APOB    | 3303  | HSPA1A  | L |
| 338 | APOB    | 3309  | HSPA5   | L |
| 338 | APOB    | 3320  | HSPCA   | L |
| 338 | APOB    | 3949  | LDLR    | L |
| 338 | APOB    | 3990  | LIPC    | L |
| 338 | APOB    | 4036  | LRP2    | L |
| 338 | APOB    | 4547  | MTP     | L |
| 338 | APOB    | 5479  | PPIB    | L |
| 338 | APOB    | 7184  | TRA1    | L |
| 338 | APOB    | 9601  | PDIA4   | L |
| 338 | APOB    | 10952 | SEC61B  | L |
| 339 | APOBEC1 | 9530  | BAG4    | L |
| 339 | APOBEC1 | 10659 | CUGBP2  | L |
| 339 | APOBEC1 | 10930 | APOBEC2 | L |
| 339 | APOBEC1 | 29974 | ACF     | L |
| 339 | APOBEC1 | 51726 | DNAJB11 | L |
| 344 | APOC2   | 4023  | LPL     | L |
| 347 | APOD    | 3953  | LEPR    | L |
| 347 | APOD    | 81488 | GRINL1A | S |
| 348 | APOE    | 949   | SCARB1  | L |
| 348 | APOE    | 1270  | CNTF    | L |
| 348 | APOE    | 1508  | CTSB    | L |
| 348 | APOE    | 3949  | LDLR    | L |
| 348 | APOE    | 4035  | LRP1    | L |
| 348 | APOE    | 4036  | LRP2    | L |
| 348 | APOE    | 4133  | MAP2    | L |
| 348 | APOE    | 4137  | MAPT    | L |
| 348 | APOE    | 4741  | NEF3    | L |
| 348 | APOE    | 5360  | PLTP    | L |
| 348 | APOE    | 6383  | SDC2    | L |
| 348 | APOE    | 7436  | VLDLR   | L |
| 348 | APOE    | 7804  | LRP8    | L |
| 350 | APOH    | 2161  | F12     | L |
| 350 | APOH    | 4036  | LRP2    | L |
| 350 | APOH    | 7804  | LRP8    | L |
| 351 | APP     | 633   | BGN     | L |
| 351 | APP     | 642   | BLMH    | L |
| 351 | APP     | 811   | CALR    | L |
| 351 | APP     | 841   | CASP8   | L |
| 351 | APP     | 857   | CAV1    | L |
| 351 | APP     | 1278  | COL1A2  | L |
| 351 | APP     | 1282  | COL4A1  | L |
| 351 | APP     | 1284  | COL4A2  | L |
| 351 | APP     | 1285  | COL4A3  | L |
| 351 | APP     | 1287  | COL4A5  | L |
| 351 | APP     | 1288  | COL4A6  | L |
| 351 | APP     | 1504  | CTRB1   | L |
| 351 | APP     | 1600  | DAB1    | L |
| 351 | APP     | 2161  | F12     | L |
| 351 | APP     | 2192  | FBLN1   | L |
| 351 | APP     | 2597  | GAPDH   | L |
| 351 | APP     | 2934  | GSN     | L |
| 351 | APP     | 3028  | HADH2   | L |
| 351 | APP     | 3032  | HADHB   | L |
| 351 | APP     | 3163  | HMOX2   | L |
| 351 | APP     | 3339  | HSPG2   | L |
| 351 | APP     | 3416  | IDE     | L |
| 351 | APP     | 3827  | KNG1    | L |
| 351 | APP     | 3831  | KNS2    | L |
| 351 | APP     | 4035  | LRP1    | L |
| 351 | APP     | 4811  | NID1    | L |
| 351 | APP     | 5644  | PRSS1   | L |
| 351 | APP     | 5646  | PRSS3   | L |
| 351 | APP     | 5663  | PSEN1   | L |
| 351 | APP     | 6464  | SHC1    | L |



|     |       |        |                 |   |
|-----|-------|--------|-----------------|---|
| 351 | APP   | 6622   | SNCA            | L |
| 351 | APP   | 7040   | TGFB1           | L |
| 351 | APP   | 7042   | TGFB2           | L |
| 351 | APP   | 8650   | NUMB            | L |
| 351 | APP   | 8883   | APPBP1          | L |
| 351 | APP   | 9479   | MAPK8IP1        | L |
| 351 | APP   | 9546   | APBA3           | L |
| 351 | APP   | 10134  | BCAP31          | L |
| 351 | APP   | 10307  | APBB3           | L |
| 351 | APP   | 10513  | APPBP2          | L |
| 351 | APP   | 10524  | HTATIP          | L |
| 351 | APP   | 22883  | CLSTN1          | L |
| 351 | APP   | 23385  | NCSTN           | L |
| 351 | APP   | 84570  | COL25A1         | L |
| 354 | KLK3  | 2057   | EPOR            | L |
| 354 | KLK3  | 2335   | FN1             | L |
| 354 | KLK3  | 3486   | IGFBP3          | L |
| 354 | KLK3  | 5104   | SERPINA5        | L |
| 354 | KLK3  | 5858   | PZP             | L |
| 355 | FAS   | 356    | FASLG           | L |
| 355 | FAS   | 695    | BTK             | L |
| 355 | FAS   | 841    | CASP8           | L |
| 355 | FAS   | 843    | CASP10          | L |
| 355 | FAS   | 1400   | CRMP1           | S |
| 355 | FAS   | 1616   | DAXX            | L |
| 355 | FAS   | 1915   | EEF1A1          | S |
| 355 | FAS   | 2534   | FYN             | L |
| 355 | FAS   | 3932   | LCK             | L |
| 355 | FAS   | 5783   | PTPN13          | L |
| 355 | FAS   | 7329   | UBE2I           | L |
| 355 | FAS   | 7341   | SUMO1           | L |
| 355 | FAS   | 8717   | TRADD           | L |
| 355 | FAS   | 8737   | RIPK1           | L |
| 355 | FAS   | 8772   | FADD            | L |
| 355 | FAS   | 9994   | CASP8AP2        | L |
| 355 | FAS   | 10016  | PDCD6           | L |
| 355 | FAS   | 10114  | HIPK3           | L |
| 355 | FAS   | 11124  | FAF1            | L |
| 355 | FAS   | 11161  | C14orf1         | S |
| 355 | FAS   | 23017  | FAIM2           | L |
| 355 | FAS   | 55791  | C1orf103        | S |
| 355 | FAS   | 85302  | FBF1            | L |
| 355 | FAS   | 407977 | TNFSF12-TNFSF13 | L |
| 356 | FASLG | 1616   | DAXX            | L |
| 356 | FASLG | 1756   | DMD             | L |
| 356 | FASLG | 2335   | FN1             | L |
| 356 | FASLG | 2534   | FYN             | L |
| 356 | FASLG | 2885   | GRB2            | L |
| 356 | FASLG | 3932   | LCK             | L |
| 356 | FASLG | 4297   | MLL             | L |
| 356 | FASLG | 4316   | MMP7            | L |
| 356 | FASLG | 4687   | NCF1            | L |
| 356 | FASLG | 4690   | NCK1            | L |
| 356 | FASLG | 5295   | PIK3R1          | L |
| 356 | FASLG | 5783   | PTPN13          | L |
| 356 | FASLG | 6714   | SRC             | L |
| 356 | FASLG | 7341   | SUMO1           | L |
| 356 | FASLG | 7430   | VIL2            | L |
| 356 | FASLG | 8771   | TNFRSF6B        | L |
| 356 | FASLG | 9402   | GRAP2           | L |
| 356 | FASLG | 10016  | PDCD6           | L |
| 356 | FASLG | 10750  | GRAP            | L |
| 356 | FASLG | 11252  | PACSIN2         | L |
| 356 | FASLG | 23048  | FNBP1           | L |
| 358 | AQP1  | 4188   | MDF1            | R |
| 358 | AQP1  | 7205   | TRIP6           | R |
| 358 | AQP1  | 11007  | DIPA            | R |

|     |      |       |           |   |
|-----|------|-------|-----------|---|
| 358 | AQP1 | 30008 | EFEMP2    | R |
| 358 | AQP1 | 79734 | KCTD17    | R |
| 358 | AQP1 | 83755 | KRTAP4-12 | R |
| 360 | AQP3 | 5338  | PLD2      | L |
| 362 | AQP5 | 4188  | MDFI      | R |
| 367 | AR   | 573   | BAG1      | L |
| 367 | AR   | 595   | CCND1     | L |
| 367 | AR   | 672   | BRCA1     | L |
| 367 | AR   | 811   | CALR      | L |
| 367 | AR   | 834   | CASP1     | L |
| 367 | AR   | 836   | CASP3     | L |
| 367 | AR   | 840   | CASP7     | L |
| 367 | AR   | 841   | CASP8     | L |
| 367 | AR   | 857   | CAV1      | L |
| 367 | AR   | 898   | CCNE1     | L |
| 367 | AR   | 994   | CDC25B    | L |
| 367 | AR   | 1329  | COX5B     | L |
| 367 | AR   | 1387  | CREBBP    | L |
| 367 | AR   | 1499  | CTNNB1    | L |
| 367 | AR   | 2099  | ESR1      | L |
| 367 | AR   | 2274  | FHL2      | L |
| 367 | AR   | 2308  | FOXO1A    | L |
| 367 | AR   | 2316  | FLNA      | L |
| 367 | AR   | 2597  | GAPDH     | L |
| 367 | AR   | 2908  | NR3C1     | L |
| 367 | AR   | 2934  | GSN       | L |
| 367 | AR   | 2962  | GTF2F1    | L |
| 367 | AR   | 2963  | GTF2F2    | L |
| 367 | AR   | 2965  | GTF2H1    | L |
| 367 | AR   | 3065  | HDAC1     | L |
| 367 | AR   | 3146  | HMGB1     | L |
| 367 | AR   | 3169  | FOXA1     | L |
| 367 | AR   | 3320  | HSPCA     | L |
| 367 | AR   | 3416  | IDE       | L |
| 367 | AR   | 3725  | JUN       | L |
| 367 | AR   | 4088  | SMAD3     | L |
| 367 | AR   | 4089  | SMAD4     | L |
| 367 | AR   | 4790  | NFKB1     | L |
| 367 | AR   | 4841  | NONO      | L |
| 367 | AR   | 5451  | POU2F1    | L |
| 367 | AR   | 5469  | PPARBP    | L |
| 367 | AR   | 5881  | RAC3      | L |
| 367 | AR   | 5883  | RAD9A     | L |
| 367 | AR   | 5894  | RAF1      | L |
| 367 | AR   | 5901  | RAN       | L |
| 367 | AR   | 5925  | RB1       | L |
| 367 | AR   | 5970  | RELA      | L |
| 367 | AR   | 6047  | RNF4      | L |
| 367 | AR   | 6736  | SRY       | L |
| 367 | AR   | 6774  | STAT3     | L |
| 367 | AR   | 6840  | SVIL      | L |
| 367 | AR   | 6925  | TCF4      | L |
| 367 | AR   | 7041  | TGFB111   | L |
| 367 | AR   | 7181  | NR2C1     | L |
| 367 | AR   | 7182  | NR2C2     | L |
| 367 | AR   | 7251  | TSG101    | L |
| 367 | AR   | 7818  | DAP3      | L |
| 367 | AR   | 8031  | NCOA4     | L |
| 367 | AR   | 8202  | NCOA3     | L |
| 367 | AR   | 8409  | UXT       | L |
| 367 | AR   | 8431  | NR0B2     | L |
| 367 | AR   | 8648  | NCOA1     | L |
| 367 | AR   | 8805  | TRIM24    | L |
| 367 | AR   | 9063  | PIAS2     | L |
| 367 | AR   | 9282  | CRSP2     | L |
| 367 | AR   | 9604  | RNF14     | L |
| 367 | AR   | 9611  | NCOR1     | L |

|     |        |       |          |   |
|-----|--------|-------|----------|---|
| 367 | AR     | 9733  | SART3    | L |
| 367 | AR     | 10048 | RANBP9   | L |
| 367 | AR     | 10399 | GNB2L1   | L |
| 367 | AR     | 10499 | NCOA2    | L |
| 367 | AR     | 10514 | MYBBP1A  | L |
| 367 | AR     | 10524 | HTATIP   | L |
| 367 | AR     | 11140 | CDC37    | L |
| 367 | AR     | 11143 | MYST2    | L |
| 367 | AR     | 11188 | NISCH    | L |
| 367 | AR     | 24148 | C20orf14 | L |
| 367 | AR     | 25898 | RCHY1    | L |
| 367 | AR     | 27043 | PELP1    | L |
| 367 | AR     | 51588 | PIAS4    | L |
| 367 | AR     | 56924 | PAK6     | L |
| 367 | AR     | 64324 | NSD1     | L |
| 368 | ABCC6  | 7414  | VCL      | L |
| 369 | ARAF   | 445   | ASS      | L |
| 369 | ARAF   | 1460  | CSNK2B   | L |
| 369 | ARAF   | 2202  | EFEMP1   | L |
| 369 | ARAF   | 5295  | PIK3R1   | L |
| 369 | ARAF   | 5604  | MAP2K1   | L |
| 369 | ARAF   | 5605  | MAP2K2   | L |
| 369 | ARAF   | 6237  | RRAS     | L |
| 369 | ARAF   | 8533  | COPS3    | L |
| 369 | ARAF   | 10469 | TIMM44   | L |
| 369 | ARAF   | 24148 | C20orf14 | L |
| 369 | ARAF   | 51497 | TH1L     | L |
| 369 | ARAF   | 55872 | PBK      | L |
| 369 | ARAF   | 59349 | KLHL12   | R |
| 372 | ARCN1  | 1314  | COPA     | L |
| 372 | ARCN1  | 1315  | COPB     | L |
| 372 | ARCN1  | 9276  | COPB2    | L |
| 372 | ARCN1  | 22820 | COPG     | L |
| 372 | ARCN1  | 26958 | COPG2    | L |
| 373 | TRIM23 | 2669  | GEM      | R |
| 373 | TRIM23 | 7536  | SF1      | R |
| 373 | TRIM23 | 9266  | PSCD2    | L |
| 373 | TRIM23 | 9267  | PSCD1    | L |
| 373 | TRIM23 | 9883  | POM121   | R |
| 373 | TRIM23 | 23062 | GGA2     | R |
| 373 | TRIM23 | 26150 | RIBC2    | R |
| 373 | TRIM23 | 51545 | ZNF581   | R |
| 373 | TRIM23 | 58500 | ZNF250   | R |
| 373 | TRIM23 | 79173 | MGC11271 | R |
| 373 | TRIM23 | 80308 | FLAD1    | R |
| 373 | TRIM23 | 84708 | LNX      | R |
| 374 | AREG   | 896   | CCND3    | L |
| 374 | AREG   | 1956  | EGFR     | L |
| 374 | AREG   | 4318  | MMP9     | L |
| 375 | ARF1   | 1131  | CHRM3    | L |
| 375 | ARF1   | 1315  | COPB     | L |
| 375 | ARF1   | 1937  | EEF1G    | S |
| 375 | ARF1   | 4194  | MDM4     | L |
| 375 | ARF1   | 5337  | PLD1     | L |
| 375 | ARF1   | 5338  | PLD2     | L |
| 375 | ARF1   | 5898  | RALA     | L |
| 375 | ARF1   | 7094  | TLN1     | L |
| 375 | ARF1   | 8394  | PIP5K1A  | L |
| 375 | ARF1   | 8853  | DDEF2    | L |
| 375 | ARF1   | 8943  | AP3D1    | L |
| 375 | ARF1   | 9179  | AP4M1    | L |
| 375 | ARF1   | 9266  | PSCD2    | L |
| 375 | ARF1   | 9267  | PSCD1    | L |
| 375 | ARF1   | 9463  | PRKCABP  | L |
| 375 | ARF1   | 10945 | KDELRL1  | L |
| 375 | ARF1   | 11316 | COPE     | L |
| 375 | ARF1   | 22820 | COPG     | L |

|     |       |        |          |    |
|-----|-------|--------|----------|----|
| 375 | ARF1  | 23163  | GGA3     | L  |
| 375 | ARF1  | 23431  | AP4E1    | L  |
| 375 | ARF1  | 23647  | ARFIP2   | L  |
| 375 | ARF1  | 27236  | ARFIP1   | L  |
| 375 | ARF1  | 51729  | WBP11    | S  |
| 375 | ARF1  | 55738  | ARFGAP1  | L  |
| 375 | ARF1  | 84273  | C4orf14  | S  |
| 375 | ARF1  | 84725  | PLEKHA8  | L  |
| 377 | ARF3  | 9463   | PRKCABP  | L  |
| 377 | ARF3  | 9493   | KIF23    | L  |
| 377 | ARF3  | 23062  | GGA2     | L  |
| 377 | ARF3  | 23647  | ARFIP2   | L  |
| 377 | ARF3  | 27236  | ARFIP1   | L  |
| 378 | ARF4  | 1956   | EGFR     | L  |
| 379 | ARF4L | 1967   | EIF2B1   | S  |
| 379 | ARF4L | 2058   | EPRS     | S  |
| 379 | ARF4L | 3301   | DNAJA1   | S  |
| 379 | ARF4L | 5223   | PGAM1    | S  |
| 379 | ARF4L | 5589   | PRKCSH   | S  |
| 379 | ARF4L | 6638   | SNRPN    | S  |
| 379 | ARF4L | 7088   | TLE1     | S  |
| 379 | ARF4L | 9094   | UNC119   | S  |
| 379 | ARF4L | 10397  | NDRG1    | S  |
| 379 | ARF4L | 23162  | MAPK8IP3 | S  |
| 379 | ARF4L | 23204  | ARL6IP   | L  |
| 379 | ARF4L | 27436  | EML4     | S  |
| 379 | ARF4L | 29058  | C20orf30 | S  |
| 379 | ARF4L | 197131 | UBR1     | S  |
| 379 | ARF4L | 245812 | MGC40499 | S  |
| 381 | ARF5  | 8394   | PIP5K1A  | L  |
| 381 | ARF5  | 8853   | DDEF2    | L  |
| 381 | ARF5  | 23647  | ARFIP2   | L  |
| 382 | ARF6  | 408    | ARRB1    | L  |
| 382 | ARF6  | 409    | ARRB2    | L  |
| 382 | ARF6  | 1131   | CHRM3    | L  |
| 382 | ARF6  | 5337   | PLD1     | L  |
| 382 | ARF6  | 8394   | PIP5K1A  | L  |
| 382 | ARF6  | 8853   | DDEF2    | L  |
| 382 | ARF6  | 8943   | AP3D1    | L  |
| 382 | ARF6  | 9266   | PSCD2    | L  |
| 382 | ARF6  | 10640  | SEC10L1  | L  |
| 382 | ARF6  | 23396  | PIP5K1C  | L  |
| 382 | ARF6  | 23647  | ARFIP2   | L  |
| 383 | ARG1  | 384    | ARG2     | L  |
| 383 | ARG1  | 4842   | NOS1     | L  |
| 387 | RHOA  | 392    | ARHGAP1  | RL |
| 387 | RHOA  | 396    | ARHGDIA  | L  |
| 387 | RHOA  | 397    | ARHGDIB  | L  |
| 387 | RHOA  | 398    | ARHGDIG  | L  |
| 387 | RHOA  | 1609   | DGKQ     | L  |
| 387 | RHOA  | 2316   | FLNA     | L  |
| 387 | RHOA  | 3708   | ITPR1    | L  |
| 387 | RHOA  | 3737   | KCNA2    | L  |
| 387 | RHOA  | 3895   | KTN1     | L  |
| 387 | RHOA  | 4168   | MCF2     | L  |
| 387 | RHOA  | 4659   | PPP1R12A | L  |
| 387 | RHOA  | 4983   | OPHN1    | L  |
| 387 | RHOA  | 5147   | PDE6D    | L  |
| 387 | RHOA  | 5335   | PLCG1    | L  |
| 387 | RHOA  | 5337   | PLD1     | L  |
| 387 | RHOA  | 5578   | PRKCA    | L  |
| 387 | RHOA  | 5585   | PKN1     | L  |
| 387 | RHOA  | 5586   | PKN2     | L  |
| 387 | RHOA  | 5910   | RAP1GDS1 | L  |
| 387 | RHOA  | 6093   | ROCK1    | L  |
| 387 | RHOA  | 6242   | RTKN     | L  |
| 387 | RHOA  | 7052   | TGM2     | L  |

|     |         |       |          |   |
|-----|---------|-------|----------|---|
| 387 | RHOA    | 7204  | TRIO     | L |
| 387 | RHOA    | 7410  | VAV2     | L |
| 387 | RHOA    | 8506  | CNTNAP1  | L |
| 387 | RHOA    | 9181  | ARHGEF2  | L |
| 387 | RHOA    | 9600  | PITPNM1  | L |
| 387 | RHOA    | 9826  | ARHGEF11 | L |
| 387 | RHOA    | 10256 | CNKS1R1  | L |
| 387 | RHOA    | 10451 | VAV3     | L |
| 387 | RHOA    | 10567 | RABAC1   | L |
| 387 | RHOA    | 11214 | AKAP13   | L |
| 387 | RHOA    | 23002 | DAAM1    | L |
| 387 | RHOA    | 23263 | MCF2L    | L |
| 387 | RHOA    | 23365 | ARHGEF12 | L |
| 387 | RHOA    | 23463 | ICMT     | L |
| 387 | RHOA    | 23616 | SH3BP1   | L |
| 387 | RHOA    | 50619 | DEF6     | L |
| 387 | RHOA    | 50649 | ARHGEF4  | L |
| 387 | RHOA    | 51291 | GMIP     | L |
| 387 | RHOA    | 57522 | SRGAP1   | L |
| 388 | RHOB    | 398   | ARHGDIG  | L |
| 388 | RHOB    | 5147  | PDE6D    | L |
| 388 | RHOB    | 85415 | RHPN2    | L |
| 389 | RHOC    | 392   | ARHGAP1  | R |
| 389 | RHOC    | 6242  | RTKN     | L |
| 390 | RND3    | 6093  | ROCK1    | L |
| 390 | RND3    | 91544 | UBXD5    | L |
| 391 | RHOG    | 398   | ARHGDIG  | L |
| 391 | RHOG    | 1793  | DOCK1    | L |
| 391 | RHOG    | 3895  | KTN1     | L |
| 391 | RHOG    | 4296  | MAP3K11  | L |
| 391 | RHOG    | 5337  | PLD1     | L |
| 391 | RHOG    | 7410  | VAV2     | L |
| 391 | RHOG    | 10451 | VAV3     | L |
| 391 | RHOG    | 10788 | IQGAP2   | L |
| 392 | ARHGAP1 | 663   | BNIP2    | L |
| 392 | ARHGAP1 | 998   | CDC42    | L |
| 392 | ARHGAP1 | 5295  | PIK3R1   | L |
| 392 | ARHGAP1 | 5921  | RASA1    | L |
| 392 | ARHGAP1 | 6714  | SRC      | L |
| 392 | ARHGAP1 | 7454  | WAS      | L |
| 393 | ARHGAP4 | 4214  | MAP3K1   | L |
| 393 | ARHGAP4 | 4893  | NRAS     | L |
| 394 | ARHGAP5 | 3678  | ITGA5    | L |
| 394 | ARHGAP5 | 3688  | ITGB1    | L |
| 394 | ARHGAP5 | 5921  | RASA1    | L |
| 394 | ARHGAP5 | 64750 | SMURF2   | L |
| 396 | ARHGDIA | 998   | CDC42    | L |
| 396 | ARHGDIA | 1027  | CDKN1B   | S |
| 396 | ARHGDIA | 2237  | FEN1     | S |
| 396 | ARHGDIA | 3728  | JUP      | S |
| 396 | ARHGDIA | 5058  | PAK1     | L |
| 396 | ARHGDIA | 5879  | RAC1     | L |
| 396 | ARHGDIA | 5880  | RAC2     | L |
| 396 | ARHGDIA | 5962  | RDX      | L |
| 396 | ARHGDIA | 6457  | SH3GL3   | S |
| 396 | ARHGDIA | 6484  | ST3GAL4  | S |
| 396 | ARHGDIA | 23327 | NEDD4L   | S |
| 397 | ARHGDIB | 399   | RHOH     | L |
| 397 | ARHGDIB | 998   | CDC42    | L |
| 397 | ARHGDIB | 5879  | RAC1     | L |
| 397 | ARHGDIB | 5880  | RAC2     | L |
| 397 | ARHGDIB | 7409  | VAV1     | L |
| 397 | ARHGDIB | 7430  | VIL2     | L |
| 398 | ARHGDIG | 399   | RHOH     | L |
| 398 | ARHGDIG | 998   | CDC42    | L |
| 398 | ARHGDIG | 5683  | PSMA2    | L |
| 398 | ARHGDIG | 5879  | RAC1     | L |

|     |        |        |          |    |
|-----|--------|--------|----------|----|
| 399 | RHOH   | 2664   | GDI1     | L  |
| 399 | RHOH   | 3757   | KCNH2    | S  |
| 399 | RHOH   | 10813  | UTP14A   | S  |
| 399 | RHOH   | 55791  | C1orf103 | S  |
| 400 | ARL1   | 2800   | GOLGA1   | L  |
| 400 | ARL1   | 2803   | GOLGA4   | L  |
| 401 | PHOX2A | 1387   | CREBBP   | L  |
| 401 | PHOX2A | 1388   | CREBL1   | L  |
| 401 | PHOX2A | 5566   | PRKACA   | L  |
| 401 | PHOX2A | 9464   | HAND2    | L  |
| 402 | ARL2   | 5147   | PDE6D    | RL |
| 403 | ARL3   | 2803   | GOLGA4   | L  |
| 403 | ARL3   | 5147   | PDE6D    | SL |
| 403 | ARL3   | 6102   | RP2      | L  |
| 403 | ARL3   | 7088   | TLE1     | S  |
| 403 | ARL3   | 7157   | TP53     | S  |
| 403 | ARL3   | 7846   | TUBA3    | L  |
| 403 | ARL3   | 9094   | UNC119   | SL |
| 403 | ARL3   | 55791  | C1orf103 | S  |
| 403 | ARL3   | 197131 | UBR1     | S  |
| 405 | ARNT   | 2034   | EPAS1    | L  |
| 405 | ARNT   | 2963   | GTF2F2   | L  |
| 405 | ARNT   | 3091   | HIF1A    | L  |
| 405 | ARNT   | 4093   | SMAD9    | L  |
| 405 | ARNT   | 5371   | PML      | L  |
| 405 | ARNT   | 6492   | SIM1     | L  |
| 405 | ARNT   | 6493   | SIM2     | L  |
| 405 | ARNT   | 8648   | NCOA1    | L  |
| 405 | ARNT   | 9049   | AIP      | L  |
| 405 | ARNT   | 10499  | NCOA2    | L  |
| 405 | ARNT   | 10728  | PTGES3   | L  |
| 405 | ARNT   | 23462  | HEY1     | L  |
| 405 | ARNT   | 23493  | HEY2     | L  |
| 405 | ARNT   | 57491  | AHRR     | L  |
| 406 | ARNTL  | 1407   | CRY1     | L  |
| 406 | ARNTL  | 1454   | CSNK1E   | L  |
| 406 | ARNTL  | 2034   | EPAS1    | L  |
| 406 | ARNTL  | 3091   | HIF1A    | L  |
| 406 | ARNTL  | 3320   | HSPCA    | L  |
| 406 | ARNTL  | 9575   | CLOCK    | L  |
| 407 | ARR3   | 826    | CAPNS1   | S  |
| 407 | ARR3   | 1213   | CLTC     | L  |
| 407 | ARR3   | 1457   | CSNK2A1  | L  |
| 407 | ARR3   | 1856   | DVL2     | R  |
| 407 | ARR3   | 5609   | MAP2K7   | S  |
| 407 | ARR3   | 6010   | RHO      | L  |
| 407 | ARR3   | 6039   | RNASE6   | S  |
| 407 | ARR3   | 6714   | SRC      | L  |
| 407 | ARR3   | 8546   | AP3B1    | L  |
| 407 | ARR3   | 27232  | GNMT     | R  |
| 407 | ARR3   | 84838  | ZNF496   | R  |
| 407 | ARR3   | 283248 | RCOR2    | S  |
| 408 | ARRB1  | 1213   | CLTC     | L  |
| 408 | ARRB1  | 1231   | CCR2     | L  |
| 408 | ARRB1  | 1234   | CCR5     | L  |
| 408 | ARRB1  | 1445   | CSK      | L  |
| 408 | ARRB1  | 1855   | DVL1     | L  |
| 408 | ARRB1  | 1856   | DVL2     | L  |
| 408 | ARRB1  | 2268   | FGR      | L  |
| 408 | ARRB1  | 3579   | IL8RB    | L  |
| 408 | ARRB1  | 4792   | NFKBIA   | L  |
| 408 | ARRB1  | 4905   | NSF      | L  |
| 408 | ARRB1  | 4985   | OPRD1    | L  |
| 408 | ARRB1  | 5144   | PDE4D    | L  |
| 408 | ARRB1  | 5744   | PTHLH    | L  |
| 408 | ARRB1  | 5745   | PTHR1    | L  |
| 408 | ARRB1  | 5900   | RALGDS   | L  |

|     |          |        |          |   |
|-----|----------|--------|----------|---|
| 408 | ARRB1    | 7201   | TRHR     | L |
| 408 | ARRB1    | 9266   | PSCD2    | L |
| 408 | ARRB1    | 23099  | ZNF297B  | R |
| 408 | ARRB1    | 27232  | GNMT     | R |
| 409 | ARRB2    | 554    | AVPR2    | L |
| 409 | ARRB2    | 4193   | MDM2     | L |
| 409 | ARRB2    | 4217   | MAP3K5   | L |
| 409 | ARRB2    | 4922   | NTS      | L |
| 409 | ARRB2    | 4923   | NTSR1    | L |
| 409 | ARRB2    | 4985   | OPRD1    | L |
| 409 | ARRB2    | 5021   | OXTR     | L |
| 409 | ARRB2    | 5144   | PDE4D    | L |
| 409 | ARRB2    | 5602   | MAPK10   | L |
| 409 | ARRB2    | 5900   | RALGDS   | L |
| 409 | ARRB2    | 6416   | MAP2K4   | L |
| 409 | ARRB2    | 6601   | SMARCC2  | S |
| 409 | ARRB2    | 7200   | TRH      | L |
| 409 | ARRB2    | 8614   | STC2     | S |
| 409 | ARRB2    | 9266   | PSCD2    | L |
| 409 | ARRB2    | 10114  | HIPK3    | L |
| 409 | ARRB2    | 112950 | MED8     | S |
| 409 | ARRB2    | 374291 | NDUFS7   | S |
| 415 | ARSE     | 4692   | NDN      | S |
| 415 | ARSE     | 10188  | TNK2     | S |
| 415 | ARSE     | 51004  | COQ6     | S |
| 416 | ARSF     | 6625   | SNRP70   | L |
| 417 | ART1     | 5155   | PDGFB    | L |
| 421 | ARVCF    | 999    | CDH1     | L |
| 421 | ARVCF    | 1000   | CDH2     | L |
| 421 | ARVCF    | 1013   | CDH15    | L |
| 421 | ARVCF    | 55914  | ERBB2IP  | L |
| 427 | ASAH1    | 8848   | TSC22D1  | S |
| 427 | ASAH1    | 9869   | SETDB1   | S |
| 429 | ASCL1    | 650    | BMP2     | L |
| 429 | ASCL1    | 4205   | MEF2A    | L |
| 429 | ASCL1    | 6925   | TCF4     | L |
| 430 | ASCL2    | 801    | CALM1    | L |
| 430 | ASCL2    | 805    | CALM2    | L |
| 430 | ASCL2    | 808    | CALM3    | L |
| 432 | ASGR1    | 433    | ASGR2    | L |
| 432 | ASGR1    | 1719   | DHFR     | L |
| 432 | ASGR1    | 3320   | HSPCA    | L |
| 432 | ASGR1    | 7038   | TG       | L |
| 432 | ASGR1    | 7184   | TRA1     | L |
| 432 | ASGR1    | 29956  | LASS2    | L |
| 433 | ASGR2    | 29956  | LASS2    | L |
| 434 | ASIP     | 4157   | MC1R     | L |
| 434 | ASIP     | 4158   | MC2R     | L |
| 434 | ASIP     | 4159   | MC3R     | L |
| 434 | ASIP     | 4160   | MC4R     | L |
| 435 | ASL      | 5859   | QARS     | R |
| 440 | ASNS     | 29888  | STRN4    | S |
| 444 | ASPH     | 10345  | TRDN     | L |
| 445 | ASS      | 2006   | ELN      | L |
| 445 | ASS      | 64400  | FTS      | S |
| 445 | ASS      | 84164  | ASCC2    | S |
| 462 | SERPINC1 | 2147   | F2       | L |
| 462 | SERPINC1 | 5340   | PLG      | L |
| 462 | SERPINC1 | 6383   | SDC2     | L |
| 463 | ATBF1    | 22981  | KIAA0980 | R |
| 463 | ATBF1    | 55660  | FNBP3    | L |
| 466 | ATF1     | 571    | BACH1    | L |
| 466 | ATF1     | 672    | BRCA1    | L |
| 466 | ATF1     | 1385   | CREB1    | L |
| 466 | ATF1     | 1387   | CREBBP   | L |
| 466 | ATF1     | 1390   | CREM     | L |
| 466 | ATF1     | 1457   | CSNK2A1  | L |

|     |       |       |          |    |
|-----|-------|-------|----------|----|
| 466 | ATF1  | 1459  | CSNK2A2  | L  |
| 466 | ATF1  | 2551  | GABPA    | L  |
| 466 | ATF1  | 3725  | JUN      | L  |
| 466 | ATF1  | 4783  | NFIL3    | L  |
| 466 | ATF1  | 6688  | SPI1     | L  |
| 466 | ATF1  | 6928  | TCF2     | L  |
| 466 | ATF1  | 8721  | EDF1     | L  |
| 467 | ATF3  | 468   | ATF4     | L  |
| 467 | ATF3  | 1054  | CEBPG    | L  |
| 467 | ATF3  | 1386  | ATF2     | L  |
| 467 | ATF3  | 1649  | DDIT3    | L  |
| 467 | ATF3  | 2261  | FGFR3    | S  |
| 467 | ATF3  | 3725  | JUN      | L  |
| 467 | ATF3  | 3726  | JUNB     | L  |
| 467 | ATF3  | 3727  | JUND     | L  |
| 467 | ATF3  | 4088  | SMAD3    | L  |
| 467 | ATF3  | 7157  | TP53     | SL |
| 467 | ATF3  | 9586  | CREB5    | L  |
| 467 | ATF3  | 11016 | ATF7     | L  |
| 467 | ATF3  | 55509 | SNFT     | L  |
| 467 | ATF3  | 55791 | C1orf103 | S  |
| 467 | ATF3  | 83540 | CDCA1    | S  |
| 467 | ATF3  | 84966 | IGSF21   | S  |
| 468 | ATF4  | 1050  | CEBPA    | L  |
| 468 | ATF4  | 1051  | CEBPB    | L  |
| 468 | ATF4  | 1052  | CEBPD    | L  |
| 468 | ATF4  | 1053  | CEBPE    | L  |
| 468 | ATF4  | 1054  | CEBPG    | L  |
| 468 | ATF4  | 1613  | DAPK3    | L  |
| 468 | ATF4  | 1649  | DDIT3    | L  |
| 468 | ATF4  | 2353  | FOS      | L  |
| 468 | ATF4  | 2354  | FOSB     | L  |
| 468 | ATF4  | 2874  | GPS2     | R  |
| 468 | ATF4  | 2963  | GTF2F2   | L  |
| 468 | ATF4  | 3131  | HLF      | L  |
| 468 | ATF4  | 3725  | JUN      | L  |
| 468 | ATF4  | 4094  | MAF      | L  |
| 468 | ATF4  | 4779  | NFE2L1   | L  |
| 468 | ATF4  | 4780  | NFE2L2   | L  |
| 468 | ATF4  | 5432  | POLR2C   | L  |
| 468 | ATF4  | 7276  | TTR      | R  |
| 468 | ATF4  | 9568  | GPR51    | L  |
| 468 | ATF4  | 9586  | CREB5    | L  |
| 468 | ATF4  | 10538 | BATF     | L  |
| 468 | ATF4  | 11016 | ATF7     | L  |
| 468 | ATF4  | 11219 | TREX2    | R  |
| 468 | ATF4  | 23641 | LDOC1    | R  |
| 468 | ATF4  | 27185 | DISC1    | L  |
| 468 | ATF4  | 29903 | HSU79303 | S  |
| 468 | ATF4  | 55037 | FLJ20758 | R  |
| 468 | ATF4  | 55509 | SNFT     | L  |
| 468 | ATF4  | 57761 | TRIB3    | L  |
| 468 | ATF4  | 58487 | ZF       | L  |
| 472 | ATM   | 847   | CAT      | L  |
| 472 | ATM   | 3014  | H2AFX    | L  |
| 472 | ATM   | 3094  | HINT1    | L  |
| 472 | ATM   | 5591  | PRKDC    | L  |
| 472 | ATM   | 5830  | PEX5     | L  |
| 472 | ATM   | 5884  | RAD17    | L  |
| 472 | ATM   | 5976  | RENT1    | L  |
| 472 | ATM   | 7013  | TERF1    | L  |
| 472 | ATM   | 7157  | TP53     | L  |
| 472 | ATM   | 11200 | CHEK2    | L  |
| 473 | RERE  | 1822  | ATN1     | L  |
| 473 | RERE  | 7205  | TRIP6    | L  |
| 475 | ATOX1 | 538   | ATP7A    | L  |
| 475 | ATOX1 | 540   | ATP7B    | L  |



|     |          |       |          |   |
|-----|----------|-------|----------|---|
| 476 | ATP1A1   | 1072  | CFL1     | L |
| 476 | ATP1A1   | 2146  | EZH2     | S |
| 476 | ATP1A1   | 5348  | FXYD1    | L |
| 476 | ATP1A1   | 5595  | MAPK3    | L |
| 476 | ATP1A1   | 53822 | FXYD7    | L |
| 481 | ATP1B1   | 5348  | FXYD1    | L |
| 481 | ATP1B1   | 53822 | FXYD7    | L |
| 481 | ATP1B1   | 55791 | C1orf103 | S |
| 482 | ATP1B2   | 58157 | NGB      | L |
| 487 | ATP2A1   | 3667  | IRS1     | L |
| 487 | ATP2A1   | 5350  | PLN      | L |
| 487 | ATP2A1   | 6588  | SLN      | L |
| 487 | ATP2A1   | 8660  | IRS2     | L |
| 488 | ATP2A2   | 5350  | PLN      | L |
| 488 | ATP2A2   | 6271  | S100A1   | L |
| 491 | ATP2B2   | 1739  | DLG1     | L |
| 491 | ATP2B2   | 1740  | DLG2     | L |
| 491 | ATP2B2   | 1742  | DLG4     | L |
| 491 | ATP2B2   | 9351  | SLC9A3R2 | L |
| 491 | ATP2B2   | 51248 | PDZK11   | L |
| 493 | ATP2B4   | 805   | CALM2    | L |
| 493 | ATP2B4   | 1739  | DLG1     | L |
| 493 | ATP2B4   | 1740  | DLG2     | L |
| 493 | ATP2B4   | 1741  | DLG3     | L |
| 493 | ATP2B4   | 1742  | DLG4     | L |
| 493 | ATP2B4   | 8573  | CASK     | L |
| 496 | ATP4B    | 6804  | STX1A    | L |
| 498 | ATP5A1   | 91647 | ATPAF2   | L |
| 501 | ALDH7A1  | 9400  | RECQL5   | S |
| 506 | ATP5B    | 5340  | PLG      | L |
| 506 | ATP5B    | 7414  | VCL      | L |
| 506 | ATP5B    | 10197 | PSME3    | S |
| 506 | ATP5B    | 91647 | ATPAF2   | L |
| 509 | ATP5C1   | 771   | CA12     | S |
| 509 | ATP5C1   | 896   | CCND3    | S |
| 509 | ATP5C1   | 1956  | EGFR     | S |
| 509 | ATP5C1   | 3698  | ITIH2    | S |
| 509 | ATP5C1   | 4354  | MPP1     | S |
| 509 | ATP5C1   | 4709  | NDUFB3   | S |
| 509 | ATP5C1   | 5074  | PAWR     | S |
| 509 | ATP5C1   | 5764  | PTN      | S |
| 509 | ATP5C1   | 10072 | DPP3     | S |
| 509 | ATP5C1   | 10574 | CCT7     | S |
| 509 | ATP5C1   | 23649 | POLA2    | S |
| 509 | ATP5C1   | 25791 | NGEF     | S |
| 509 | ATP5C1   | 25978 | CHMP2B   | S |
| 509 | ATP5C1   | 26152 | ZNF337   | S |
| 509 | ATP5C1   | 51586 | PCQAP    | S |
| 509 | ATP5C1   | 54857 | GDPD2    | S |
| 509 | ATP5C1   | 56902 | LOC56902 | S |
| 509 | ATP5C1   | 64219 | PJA1     | S |
| 509 | ATP5C1   | 84337 | ELOF1    | S |
| 518 | ATP5G3   | 7920  | BAT5     | L |
| 527 | ATP6V0C  | 4140  | MARK3    | S |
| 527 | ATP6V0C  | 29956 | LASS2    | L |
| 529 | ATP6V1E1 | 534   | ATP6V1G2 | L |
| 529 | ATP6V1E1 | 2547  | XRCC6    | S |
| 529 | ATP6V1E1 | 6654  | SOS1     | L |
| 529 | ATP6V1E1 | 9368  | SLC9A3R1 | L |
| 529 | ATP6V1E1 | 9550  | ATP6V1G1 | S |
| 529 | ATP6V1E1 | 51606 | ATP6V1H  | L |
| 537 | ATP6AP1  | 3039  | HBA1     | S |
| 538 | ATP7A    | 1356  | CP       | L |
| 545 | ATR      | 672   | BRCA1    | L |
| 545 | ATR      | 1108  | CHD4     | L |
| 545 | ATR      | 4436  | MSH2     | L |
| 545 | ATR      | 5371  | PML      | L |

|     |        |       |          |   |
|-----|--------|-------|----------|---|
| 545 | ATR    | 11200 | CHEK2    | L |
| 545 | ATR    | 11277 | TREX1    | L |
| 545 | ATR    | 63967 | CLSPN    | L |
| 546 | ATRX   | 2146  | EZH2     | L |
| 546 | ATRX   | 5764  | PTN      | S |
| 546 | ATRX   | 5775  | PTPN4    | S |
| 546 | ATRX   | 51631 | LUC7L2   | S |
| 546 | ATRX   | 54462 | KIAA1128 | S |
| 546 | ATRX   | 57473 | GM632    | L |
| 546 | ATRX   | 57562 | KIAA1377 | S |
| 547 | KIF1A  | 28964 | GIT1     | L |
| 550 | AUP1   | 3672  | ITGA1    | L |
| 550 | AUP1   | 3673  | ITGA2    | L |
| 550 | AUP1   | 3674  | ITGA2B   | L |
| 550 | AUP1   | 3678  | ITGA5    | L |
| 550 | AUP1   | 3684  | ITGAM    | L |
| 550 | AUP1   | 3685  | ITGAV    | L |
| 550 | AUP1   | 26994 | RNF11    | L |
| 551 | AVP    | 552   | AVPR1A   | L |
| 551 | AVP    | 553   | AVPR1B   | L |
| 551 | AVP    | 554   | AVPR2    | L |
| 551 | AVP    | 5021  | OXTR     | L |
| 552 | AVPR1A | 2869  | GRK5     | L |
| 552 | AVPR1A | 5578  | PRKCA    | L |
| 553 | AVPR1B | 2869  | GRK5     | L |
| 554 | AVPR2  | 2778  | GNAS     | L |
| 554 | AVPR2  | 2869  | GRK5     | L |
| 558 | AXL    | 2621  | GAS6     | L |
| 558 | AXL    | 2885  | GRB2     | L |
| 558 | AXL    | 3932  | LCK      | L |
| 558 | AXL    | 5296  | PIK3R2   | L |
| 558 | AXL    | 6464  | SHC1     | L |
| 558 | AXL    | 6714  | SRC      | L |
| 563 | AZGP1  | 3685  | ITGAV    | L |
| 567 | B2M    | 909   | CD1A     | L |
| 567 | B2M    | 910   | CD1B     | L |
| 567 | B2M    | 912   | CD1D     | L |
| 567 | B2M    | 913   | CD1E     | L |
| 567 | B2M    | 925   | CD8A     | L |
| 567 | B2M    | 2217  | FCGRT    | L |
| 567 | B2M    | 3077  | HFE      | L |
| 567 | B2M    | 3105  | HLA-A    | L |
| 567 | B2M    | 3106  | HLA-B    | L |
| 567 | B2M    | 3107  | HLA-C    | L |
| 567 | B2M    | 3133  | HLA-E    | L |
| 567 | B2M    | 3135  | HLA-G    | L |
| 567 | B2M    | 7414  | VCL      | L |
| 567 | B2M    | 7917  | BAT3     | S |
| 567 | B2M    | 10859 | LILRB1   | L |
| 567 | B2M    | 11098 | PRSS23   | S |
| 570 | BAAT   | 23657 | SLC7A11  | L |
| 571 | BACH1  | 672   | BRCA1    | L |
| 571 | BACH1  | 1386  | ATF2     | L |
| 571 | BACH1  | 1390  | CREM     | L |
| 571 | BACH1  | 4094  | MAF      | L |
| 571 | BACH1  | 4097  | MAFG     | L |
| 571 | BACH1  | 7975  | MAFK     | L |
| 571 | BACH1  | 9586  | CREB5    | L |
| 571 | BACH1  | 9935  | MAFB     | L |
| 571 | BACH1  | 11016 | ATF7     | L |
| 572 | BAD    | 596   | BCL2     | L |
| 572 | BAD    | 597   | BCL2A1   | L |
| 572 | BAD    | 598   | BCL2L1   | L |
| 572 | BAD    | 599   | BCL2L2   | L |
| 572 | BAD    | 2130  | EWSR1    | R |
| 572 | BAD    | 2810  | SFN      | R |
| 572 | BAD    | 4170  | MCL1     | L |

|     |       |        |          |    |
|-----|-------|--------|----------|----|
| 572 | BAD   | 6281   | S100A10  | L  |
| 572 | BAD   | 6622   | SNCA     | L  |
| 572 | BAD   | 7009   | TEGT     | L  |
| 572 | BAD   | 7529   | YWHAB    | L  |
| 572 | BAD   | 7531   | YWHAE    | L  |
| 572 | BAD   | 7533   | YWHAH    | L  |
| 572 | BAD   | 7534   | YWHAZ    | L  |
| 572 | BAD   | 10017  | BCL2L10  | L  |
| 572 | BAD   | 10971  | YWHAQ    | L  |
| 572 | BAD   | 11040  | PIM2     | L  |
| 573 | BAG1  | 596    | BCL2     | L  |
| 573 | BAG1  | 598    | BCL2L1   | L  |
| 573 | BAG1  | 1839   | HBEGF    | L  |
| 573 | BAG1  | 2099   | ESR1     | L  |
| 573 | BAG1  | 2908   | NR3C1    | L  |
| 573 | BAG1  | 3312   | HSPA8    | L  |
| 573 | BAG1  | 4233   | MET      | L  |
| 573 | BAG1  | 5159   | PDGFRB   | L  |
| 573 | BAG1  | 5894   | RAF1     | L  |
| 573 | BAG1  | 5914   | RARA     | L  |
| 573 | BAG1  | 5925   | RB1      | L  |
| 573 | BAG1  | 6477   | SIAH1    | L  |
| 573 | BAG1  | 6767   | ST13     | L  |
| 573 | BAG1  | 7421   | VDR      | L  |
| 573 | BAG1  | 10273  | STUB1    | L  |
| 573 | BAG1  | 23645  | PPP1R15A | L  |
| 575 | BAI1  | 1742   | DLG4     | L  |
| 575 | BAI1  | 8938   | BAIAP3   | L  |
| 575 | BAI1  | 9223   | MAGI1    | L  |
| 575 | BAI1  | 10458  | BAIAP2   | L  |
| 575 | BAI1  | 260425 | MAGI3    | L  |
| 576 | BAI2  | 7094   | TLN1     | L  |
| 576 | BAI2  | 22941  | SHANK2   | L  |
| 576 | BAI2  | 50944  | SHANK1   | L  |
| 576 | BAI2  | 55805  | LRP2BP   | L  |
| 576 | BAI2  | 90627  | STARD13  | L  |
| 576 | BAI2  | 307255 | (null)   | S  |
| 578 | BAK1  | 581    | BAX      | L  |
| 578 | BAK1  | 596    | BCL2     | L  |
| 578 | BAK1  | 597    | BCL2A1   | L  |
| 578 | BAK1  | 598    | BCL2L1   | RL |
| 578 | BAK1  | 3329   | HSPD1    | L  |
| 578 | BAK1  | 4170   | MCL1     | L  |
| 578 | BAK1  | 7157   | TP53     | L  |
| 578 | BAK1  | 7417   | VDAC2    | L  |
| 580 | BARD1 | 602    | BCL3     | L  |
| 580 | BARD1 | 672    | BRCA1    | L  |
| 580 | BARD1 | 1477   | CSTF1    | L  |
| 580 | BARD1 | 2130   | EWSR1    | L  |
| 580 | BARD1 | 4436   | MSH2     | L  |
| 580 | BARD1 | 5430   | POLR2A   | L  |
| 580 | BARD1 | 5451   | POU2F1   | L  |
| 580 | BARD1 | 5932   | RBBP8    | L  |
| 580 | BARD1 | 7323   | UBE2D3   | L  |
| 580 | BARD1 | 7332   | UBE2L3   | L  |
| 581 | BAX   | 596    | BCL2     | L  |
| 581 | BAX   | 597    | BCL2A1   | L  |
| 581 | BAX   | 598    | BCL2L1   | L  |
| 581 | BAX   | 4170   | MCL1     | L  |
| 581 | BAX   | 7416   | VDAC1    | L  |
| 581 | BAX   | 10017  | BCL2L10  | L  |
| 581 | BAX   | 10971  | YWHAQ    | L  |
| 581 | BAX   | 51100  | SH3GLB1  | L  |
| 581 | BAX   | 64112  | MOAP1    | L  |
| 583 | BBS2  | 10197  | PSME3    | R  |
| 585 | BBS4  | 5108   | PCM1     | L  |
| 586 | BCAT1 | 4090   | SMAD5    | L  |

|     |        |       |         |   |
|-----|--------|-------|---------|---|
| 590 | BCHE   | 8292  | COLQ    | L |
| 593 | BCKDHA | 594   | BCKDHB  | L |
| 595 | CCND1  | 672   | BRCA1   | L |
| 595 | CCND1  | 801   | CALM1   | L |
| 595 | CCND1  | 1019  | CDK4    | L |
| 595 | CCND1  | 1021  | CDK6    | L |
| 595 | CCND1  | 1026  | CDKN1A  | L |
| 595 | CCND1  | 1027  | CDKN1B  | L |
| 595 | CCND1  | 1032  | CDKN2D  | L |
| 595 | CCND1  | 1316  | KLF6    | L |
| 595 | CCND1  | 1499  | CTNNB1  | L |
| 595 | CCND1  | 2033  | EP300   | L |
| 595 | CCND1  | 2099  | ESR1    | L |
| 595 | CCND1  | 3429  | IFI27   | L |
| 595 | CCND1  | 4605  | MYBL2   | L |
| 595 | CCND1  | 5000  | ORC4L   | L |
| 595 | CCND1  | 5925  | RB1     | L |
| 595 | CCND1  | 5933  | RBL1    | L |
| 595 | CCND1  | 5981  | RFC1    | L |
| 595 | CCND1  | 6774  | STAT3   | L |
| 595 | CCND1  | 6872  | TAF1    | L |
| 595 | CCND1  | 7067  | THRA    | L |
| 595 | CCND1  | 8202  | NCOA3   | L |
| 595 | CCND1  | 8452  | CUL3    | L |
| 595 | CCND1  | 8648  | NCOA1   | L |
| 595 | CCND1  | 8850  | PCAF    | L |
| 595 | CCND1  | 9978  | RBX1    | L |
| 595 | CCND1  | 9988  | DMTF1   | L |
| 595 | CCND1  | 10270 | AKAP8   | L |
| 595 | CCND1  | 23582 | CCNDBP1 | L |
| 595 | CCND1  | 51191 | HERC5   | L |
| 595 | CCND1  | 55388 | MCM10   | L |
| 596 | BCL2   | 637   | BID     | L |
| 596 | BCL2   | 638   | BIK     | L |
| 596 | BCL2   | 640   | BLK     | L |
| 596 | BCL2   | 662   | BNIP1   | L |
| 596 | BCL2   | 663   | BNIP2   | L |
| 596 | BCL2   | 664   | BNIP3   | L |
| 596 | BCL2   | 665   | BNIP3L  | L |
| 596 | BCL2   | 836   | CASP3   | L |
| 596 | BCL2   | 841   | CASP8   | L |
| 596 | BCL2   | 1017  | CDK2    | L |
| 596 | BCL2   | 3164  | NR4A1   | L |
| 596 | BCL2   | 3265  | HRAS    | L |
| 596 | BCL2   | 3303  | HSPA1A  | L |
| 596 | BCL2   | 3708  | ITPR1   | L |
| 596 | BCL2   | 3845  | KRAS    | L |
| 596 | BCL2   | 4893  | NRAS    | L |
| 596 | BCL2   | 5300  | PIN1    | L |
| 596 | BCL2   | 5515  | PPP2CA  | L |
| 596 | BCL2   | 5525  | PPP2R5A | L |
| 596 | BCL2   | 5530  | PPP3CA  | L |
| 596 | BCL2   | 5594  | MAPK1   | L |
| 596 | BCL2   | 5663  | PSEN1   | L |
| 596 | BCL2   | 5883  | RAD9A   | L |
| 596 | BCL2   | 5894  | RAF1    | L |
| 596 | BCL2   | 6009  | RHEB    | L |
| 596 | BCL2   | 6237  | RRAS    | L |
| 596 | BCL2   | 6606  | SMN1    | L |
| 596 | BCL2   | 6647  | SOD1    | L |
| 596 | BCL2   | 7009  | TEGT    | L |
| 596 | BCL2   | 7159  | TP53BP2 | L |
| 596 | BCL2   | 7536  | SF1     | L |
| 596 | BCL2   | 8678  | BECN1   | L |
| 596 | BCL2   | 8739  | HRK     | L |
| 596 | BCL2   | 9088  | PKMYT1  | L |
| 596 | BCL2   | 9445  | ITM2B   | L |

|     |        |       |         |    |
|-----|--------|-------|---------|----|
| 596 | BCL2   | 9530  | BAG4    | L  |
| 596 | BCL2   | 9531  | BAG3    | L  |
| 596 | BCL2   | 9774  | BCLAF1  | L  |
| 596 | BCL2   | 9804  | TOMM20  | L  |
| 596 | BCL2   | 10017 | BCL2L10 | L  |
| 596 | BCL2   | 10018 | BCL2L11 | L  |
| 596 | BCL2   | 10134 | BCAP31  | L  |
| 596 | BCL2   | 23770 | FKBP8   | L  |
| 596 | BCL2   | 54205 | CYCS    | L  |
| 596 | BCL2   | 57142 | RTN4    | L  |
| 596 | BCL2   | 63970 | P53AIP1 | L  |
| 596 | BCL2   | 64112 | MOAP1   | L  |
| 596 | BCL2   | 79370 | BCL2L14 | L  |
| 596 | BCL2   | 83985 | SPIN1   | L  |
| 596 | BCL2   | 90427 | BMF     | L  |
| 597 | BCL2A1 | 637   | BID     | L  |
| 597 | BCL2A1 | 638   | BIK     | L  |
| 597 | BCL2A1 | 666   | BOK     | L  |
| 597 | BCL2A1 | 2885  | GRB2    | L  |
| 598 | BCL2L1 | 637   | BID     | L  |
| 598 | BCL2L1 | 638   | BIK     | RL |
| 598 | BCL2L1 | 662   | BNIP1   | L  |
| 598 | BCL2L1 | 664   | BNIP3   | L  |
| 598 | BCL2L1 | 665   | BNIP3L  | L  |
| 598 | BCL2L1 | 841   | CASP8   | L  |
| 598 | BCL2L1 | 842   | CASP9   | L  |
| 598 | BCL2L1 | 3667  | IRS1    | L  |
| 598 | BCL2L1 | 5663  | PSEN1   | L  |
| 598 | BCL2L1 | 5664  | PSEN2   | L  |
| 598 | BCL2L1 | 5883  | RAD9A   | L  |
| 598 | BCL2L1 | 6252  | RTN1    | L  |
| 598 | BCL2L1 | 6622  | SNCA    | L  |
| 598 | BCL2L1 | 7009  | TEGT    | L  |
| 598 | BCL2L1 | 7157  | TP53    | L  |
| 598 | BCL2L1 | 7416  | VDAC1   | L  |
| 598 | BCL2L1 | 8660  | IRS2    | L  |
| 598 | BCL2L1 | 8678  | BECN1   | L  |
| 598 | BCL2L1 | 8739  | HRK     | L  |
| 598 | BCL2L1 | 8837  | CFLAR   | L  |
| 598 | BCL2L1 | 10018 | BCL2L11 | L  |
| 598 | BCL2L1 | 10134 | BCAP31  | L  |
| 598 | BCL2L1 | 22806 | ZNFN1A3 | L  |
| 598 | BCL2L1 | 23770 | FKBP8   | L  |
| 598 | BCL2L1 | 54205 | CYCS    | L  |
| 598 | BCL2L1 | 57099 | AVEN    | L  |
| 598 | BCL2L1 | 57142 | RTN4    | L  |
| 598 | BCL2L1 | 64112 | MOAP1   | L  |
| 598 | BCL2L1 | 79370 | BCL2L14 | L  |
| 598 | BCL2L1 | 83596 | BCL2L12 | L  |
| 598 | BCL2L1 | 83985 | SPIN1   | L  |
| 598 | BCL2L1 | 84168 | ANTXR1  | L  |
| 599 | BCL2L2 | 90427 | BMF     | L  |
| 602 | BCL3   | 1387  | CREBBP  | L  |
| 602 | BCL3   | 2353  | FOS     | L  |
| 602 | BCL3   | 2534  | FYN     | L  |
| 602 | BCL3   | 2957  | GTF2A1  | L  |
| 602 | BCL3   | 2959  | GTF2B   | L  |
| 602 | BCL3   | 3725  | JUN     | L  |
| 602 | BCL3   | 4790  | NFKB1   | L  |
| 602 | BCL3   | 4791  | NFKB2   | L  |
| 602 | BCL3   | 6256  | RXRA    | L  |
| 602 | BCL3   | 6464  | SHC1    | L  |
| 602 | BCL3   | 6908  | TBP     | L  |
| 602 | BCL3   | 8648  | NCOA1   | L  |
| 602 | BCL3   | 9367  | RAB9A   | L  |
| 602 | BCL3   | 10524 | HTATIP  | L  |
| 602 | BCL3   | 10987 | COPS5   | L  |

|     |          |        |                 |   |
|-----|----------|--------|-----------------|---|
| 602 | BCL3     | 55728  | N4BP2           | L |
| 604 | BCL6     | 3662   | IRF4            | L |
| 604 | BCL6     | 3725   | JUN             | L |
| 604 | BCL6     | 3726   | JUNB            | L |
| 604 | BCL6     | 3727   | JUND            | L |
| 604 | BCL6     | 5467   | PPARD           | L |
| 604 | BCL6     | 6667   | SP1             | L |
| 604 | BCL6     | 7704   | ZBTB16          | L |
| 604 | BCL6     | 9611   | NCOR1           | L |
| 604 | BCL6     | 9612   | NCOR2           | L |
| 604 | BCL6     | 9734   | HDAC9           | L |
| 604 | BCL6     | 9759   | HDAC4           | L |
| 604 | BCL6     | 10014  | HDAC5           | L |
| 604 | BCL6     | 25942  | SIN3A           | L |
| 604 | BCL6     | 51341  | ZBTB7A          | L |
| 604 | BCL6     | 51564  | HDAC7A          | L |
| 604 | BCL6     | 54880  | BCOR            | L |
| 607 | BCL9     | 1499   | CTNNB1          | L |
| 607 | BCL9     | 26108  | PYGO1           | L |
| 607 | BCL9     | 90780  | PYGO2           | L |
| 608 | TNFRSF17 | 7185   | TRAF1           | L |
| 608 | TNFRSF17 | 7186   | TRAF2           | L |
| 608 | TNFRSF17 | 7187   | TRAF3           | L |
| 608 | TNFRSF17 | 10673  | TNFSF13B        | L |
| 608 | TNFRSF17 | 407977 | TNFSF12-TNFSF13 | L |
| 610 | HCN2     | 348980 | HCN1            | L |
| 613 | BCR      | 640    | BLK             | L |
| 613 | BCR      | 2071   | ERCC3           | L |
| 613 | BCR      | 2242   | FES             | L |
| 613 | BCR      | 2885   | GRB2            | L |
| 613 | BCR      | 2887   | GRB10           | L |
| 613 | BCR      | 3717   | JAK2            | L |
| 613 | BCR      | 4301   | MLLT4           | L |
| 613 | BCR      | 5335   | PLCG1           | L |
| 613 | BCR      | 5777   | PTPN6           | L |
| 613 | BCR      | 5781   | PTPN11          | L |
| 613 | BCR      | 5921   | RASA1           | L |
| 613 | BCR      | 6464   | SHC1            | L |
| 613 | BCR      | 6714   | SRC             | L |
| 613 | BCR      | 7157   | TP53            | S |
| 613 | BCR      | 7409   | VAV1            | L |
| 613 | BCR      | 7534   | YWHAZ           | L |
| 613 | BCR      | 8440   | NCK2            | L |
| 613 | BCR      | 9094   | UNC119          | S |
| 613 | BCR      | 11183  | MAP4K5          | L |
| 613 | BCR      | 84966  | IGSF21          | S |
| 617 | BCS1L    | 57062  | DDX24           | S |
| 624 | BDKRB2   | 4842   | NOS1            | L |
| 624 | BDKRB2   | 4846   | NOS3            | L |
| 624 | BDKRB2   | 5781   | PTPN11          | L |
| 627 | BDNF     | 4684   | NCAM1           | L |
| 627 | BDNF     | 4846   | NOS3            | L |
| 627 | BDNF     | 4908   | NTF3            | L |
| 627 | BDNF     | 4909   | NTF5            | L |
| 627 | BDNF     | 4915   | NTRK2           | L |
| 629 | BF       | 718    | C3              | L |
| 629 | BF       | 721    | C4B             | L |
| 629 | BF       | 5199   | PFC             | L |
| 631 | BFSP1    | 7431   | VIM             | L |
| 631 | BFSP1    | 8419   | BFSP2           | L |
| 632 | BGLAP    | 2677   | GGCX            | L |
| 633 | BGN      | 1277   | COL1A1          | L |
| 633 | BGN      | 1278   | COL1A2          | L |
| 633 | BGN      | 1284   | COL4A2          | L |
| 633 | BGN      | 2006   | ELN             | L |
| 633 | BGN      | 4237   | MFAP2           | L |
| 633 | BGN      | 6442   | SGCA            | L |

|     |         |       |          |   |
|-----|---------|-------|----------|---|
| 633 | BGN     | 7040  | TGFB1    | L |
| 633 | BGN     | 7124  | TNF      | L |
| 634 | CEACAM1 | 1088  | CEACAM8  | L |
| 634 | CEACAM1 | 4680  | CEACAM6  | L |
| 634 | CEACAM1 | 5777  | PTPN6    | L |
| 634 | CEACAM1 | 5781  | PTPN11   | L |
| 634 | CEACAM1 | 5829  | PXN      | L |
| 634 | CEACAM1 | 6464  | SHC1     | L |
| 636 | BICD1   | 5870  | RAB6A    | L |
| 636 | BICD1   | 10540 | DCTN2    | L |
| 637 | BID     | 823   | CAPN1    | L |
| 637 | BID     | 835   | CASP2    | L |
| 639 | PRDM1   | 3662  | IRF4     | L |
| 639 | PRDM1   | 7088  | TLE1     | L |
| 639 | PRDM1   | 7089  | TLE2     | L |
| 640 | BLK     | 867   | CBL      | L |
| 640 | BLK     | 2212  | FCGR2A   | L |
| 640 | BLK     | 5336  | PLCG2    | L |
| 640 | BLK     | 7337  | UBE3A    | L |
| 640 | BLK     | 9646  | SH2BP1   | L |
| 640 | BLK     | 10286 | BCAS2    | L |
| 641 | BLM     | 4292  | MLH1     | L |
| 641 | BLM     | 4599  | MX1      | L |
| 641 | BLM     | 5888  | RAD51    | L |
| 641 | BLM     | 5892  | RAD51L3  | L |
| 641 | BLM     | 6117  | RPA1     | L |
| 641 | BLM     | 7014  | TERF2    | L |
| 641 | BLM     | 7156  | TOP3A    | L |
| 641 | BLM     | 7157  | TP53     | L |
| 641 | BLM     | 7486  | WRN      | L |
| 641 | BLM     | 8243  | SMC1L1   | L |
| 642 | BLMH    | 6135  | RPL11    | L |
| 642 | BLMH    | 6159  | RPL29    | L |
| 642 | BLMH    | 7204  | TRIO     | S |
| 642 | BLMH    | 7329  | UBE2I    | L |
| 642 | BLMH    | 84078 | KBTBD7   | R |
| 643 | BLR1    | 10563 | CXCL13   | L |
| 648 | PCGF4   | 1876  | E2F6     | L |
| 648 | PCGF4   | 1912  | PHC2     | L |
| 648 | PCGF4   | 4297  | MLL      | L |
| 648 | PCGF4   | 5764  | PTN      | S |
| 648 | PCGF4   | 6015  | RING1    | L |
| 648 | PCGF4   | 7704  | ZBTB16   | L |
| 648 | PCGF4   | 10524 | HTATIP   | S |
| 648 | PCGF4   | 10989 | IMMT     | S |
| 648 | PCGF4   | 55791 | C1orf103 | S |
| 648 | PCGF4   | 57562 | KIAA1377 | S |
| 649 | BMP1    | 3909  | LAMA3    | L |
| 649 | BMP1    | 3914  | LAMB3    | L |
| 649 | BMP1    | 3918  | LAMC2    | L |
| 649 | BMP1    | 56252 | YLPM1    | S |
| 649 | BMP1    | 57045 | TWSG1    | L |
| 650 | BMP2    | 657   | BMPR1A   | L |
| 650 | BMP2    | 658   | BMPR1B   | L |
| 650 | BMP2    | 659   | BMPR2    | L |
| 650 | BMP2    | 1280  | COL2A1   | L |
| 650 | BMP2    | 2022  | ENG      | L |
| 650 | BMP2    | 4256  | MGP      | L |
| 650 | BMP2    | 7040  | TGFB1    | L |
| 650 | BMP2    | 7042  | TGFB2    | L |
| 650 | BMP2    | 9241  | NOG      | L |
| 651 | BMP3    | 7040  | TGFB1    | L |
| 652 | BMP4    | 656   | BMP8B    | L |
| 652 | BMP4    | 657   | BMPR1A   | L |
| 652 | BMP4    | 658   | BMPR1B   | L |
| 652 | BMP4    | 659   | BMPR2    | L |
| 652 | BMP4    | 9241  | NOG      | L |

|     |        |        |           |   |
|-----|--------|--------|-----------|---|
| 652 | BMP4   | 9372   | ZFYVE9    | L |
| 652 | BMP4   | 55620  | STAP2     | L |
| 653 | BMP5   | 657    | BMPR1A    | L |
| 653 | BMP5   | 9241   | NOG       | L |
| 653 | BMP5   | 10468  | FST       | L |
| 654 | BMP6   | 657    | BMPR1A    | L |
| 654 | BMP6   | 658    | BMPR1B    | L |
| 654 | BMP6   | 659    | BMPR2     | L |
| 654 | BMP6   | 4090   | SMAD5     | L |
| 654 | BMP6   | 8202   | NCOA3     | L |
| 655 | BMP7   | 657    | BMPR1A    | L |
| 655 | BMP7   | 658    | BMPR1B    | L |
| 655 | BMP7   | 659    | BMPR2     | L |
| 655 | BMP7   | 2022   | ENG       | L |
| 655 | BMP7   | 8202   | NCOA3     | L |
| 655 | BMP7   | 9241   | NOG       | L |
| 657 | BMPR1A | 658    | BMPR1B    | L |
| 657 | BMPR1A | 659    | BMPR2     | L |
| 657 | BMPR1A | 2661   | GDF9      | L |
| 657 | BMPR1A | 3224   | HOXC8     | L |
| 657 | BMPR1A | 4086   | SMAD1     | L |
| 657 | BMPR1A | 8200   | GDF5      | L |
| 657 | BMPR1A | 9392   | TGFBRAP1  | L |
| 657 | BMPR1A | 10454  | MAP3K7IP1 | L |
| 658 | BMPR1B | 659    | BMPR2     | L |
| 658 | BMPR1B | 2661   | GDF9      | L |
| 658 | BMPR1B | 8200   | GDF5      | L |
| 659 | BMPR2  | 2661   | GDF9      | L |
| 659 | BMPR2  | 3984   | LIMK1     | L |
| 659 | BMPR2  | 8200   | GDF5      | L |
| 659 | BMPR2  | 392255 | GDF6      | L |
| 660 | BMX    | 836    | CASP3     | L |
| 660 | BMX    | 857    | CAV1      | L |
| 660 | BMX    | 5058   | PAK1      | L |
| 660 | BMX    | 5747   | PTK2      | L |
| 660 | BMX    | 6714   | SRC       | L |
| 660 | BMX    | 6772   | STAT1     | L |
| 660 | BMX    | 6774   | STAT3     | L |
| 660 | BMX    | 6776   | STAT5A    | L |
| 660 | BMX    | 11099  | PTPN21    | L |
| 660 | BMX    | 80230  | RUFY1     | L |
| 662 | BNIP1  | 4686   | NCBP1     | L |
| 663 | BNIP2  | 998    | CDC42     | L |
| 663 | BNIP2  | 2260   | FGFR1     | L |
| 663 | BNIP2  | 10488  | CREB3     | R |
| 664 | BNIP3  | 665    | BNIP3L    | R |
| 664 | BNIP3  | 961    | CD47      | L |
| 664 | BNIP3  | 4686   | NCBP1     | L |
| 664 | BNIP3  | 8834   | TMEM11    | R |
| 665 | BNIP3L | 2130   | EWSR1     | R |
| 665 | BNIP3L | 8834   | TMEM11    | R |
| 665 | BNIP3L | 55240  | STEAP3    | L |
| 665 | BNIP3L | 55816  | DOK5      | R |
| 665 | BNIP3L | 60561  | RINT-1    | S |
| 666 | BOK    | 4170   | MCL1      | L |
| 667 | DST    | 1308   | COL17A1   | L |
| 667 | DST    | 1639   | DCTN1     | L |
| 667 | DST    | 3691   | ITGB4     | L |
| 667 | DST    | 4093   | SMAD9     | L |
| 667 | DST    | 25865  | PRKD2     | L |
| 667 | DST    | 55914  | ERBB2IP   | L |
| 669 | BPGM   | 2597   | GAPDH     | L |
| 672 | BRCA1  | 675    | BRCA2     | L |
| 672 | BRCA1  | 890    | CCNA2     | L |
| 672 | BRCA1  | 891    | CCNB1     | L |
| 672 | BRCA1  | 983    | CDC2      | L |
| 672 | BRCA1  | 1017   | CDK2      | L |



|     |       |       |         |   |
|-----|-------|-------|---------|---|
| 672 | BRCA1 | 1019  | CDK4    | L |
| 672 | BRCA1 | 1040  | CDS1    | L |
| 672 | BRCA1 | 1387  | CREBBP  | L |
| 672 | BRCA1 | 1457  | CSNK2A1 | L |
| 672 | BRCA1 | 1460  | CSNK2B  | L |
| 672 | BRCA1 | 1487  | CTBP1   | L |
| 672 | BRCA1 | 1488  | CTBP2   | L |
| 672 | BRCA1 | 1660  | DHX9    | L |
| 672 | BRCA1 | 1869  | E2F1    | L |
| 672 | BRCA1 | 1874  | E2F4    | L |
| 672 | BRCA1 | 2002  | ELK1    | L |
| 672 | BRCA1 | 2033  | EP300   | L |
| 672 | BRCA1 | 2099  | ESR1    | L |
| 672 | BRCA1 | 2175  | FANCA   | L |
| 672 | BRCA1 | 2177  | FANCD2  | L |
| 672 | BRCA1 | 2316  | FLNA    | L |
| 672 | BRCA1 | 3065  | HDAC1   | L |
| 672 | BRCA1 | 3066  | HDAC2   | L |
| 672 | BRCA1 | 3716  | JAK1    | L |
| 672 | BRCA1 | 3717  | JAK2    | L |
| 672 | BRCA1 | 3725  | JUN     | L |
| 672 | BRCA1 | 3726  | JUNB    | L |
| 672 | BRCA1 | 3727  | JUND    | L |
| 672 | BRCA1 | 3836  | KPNA1   | L |
| 672 | BRCA1 | 4215  | MAP3K3  | L |
| 672 | BRCA1 | 4436  | MSH2    | L |
| 672 | BRCA1 | 4609  | MYC     | L |
| 672 | BRCA1 | 4790  | NFKB1   | L |
| 672 | BRCA1 | 4800  | NFYA    | L |
| 672 | BRCA1 | 5430  | POLR2A  | L |
| 672 | BRCA1 | 5440  | POLR2K  | L |
| 672 | BRCA1 | 5469  | PPARBP  | L |
| 672 | BRCA1 | 5888  | RAD51   | L |
| 672 | BRCA1 | 5925  | RB1     | L |
| 672 | BRCA1 | 5928  | RBBP4   | L |
| 672 | BRCA1 | 5931  | RBBP7   | L |
| 672 | BRCA1 | 5932  | RBBP8   | L |
| 672 | BRCA1 | 5970  | RELA    | L |
| 672 | BRCA1 | 5981  | RFC1    | L |
| 672 | BRCA1 | 6597  | SMARCA4 | L |
| 672 | BRCA1 | 6667  | SP1     | L |
| 672 | BRCA1 | 6772  | STAT1   | L |
| 672 | BRCA1 | 6774  | STAT3   | L |
| 672 | BRCA1 | 6776  | STAT5A  | L |
| 672 | BRCA1 | 7157  | TP53    | L |
| 672 | BRCA1 | 7283  | TUBG1   | L |
| 672 | BRCA1 | 7323  | UBE2D3  | L |
| 672 | BRCA1 | 7332  | UBE2L3  | L |
| 672 | BRCA1 | 7392  | USF2    | L |
| 672 | BRCA1 | 7415  | VCP     | L |
| 672 | BRCA1 | 7515  | XRCC1   | L |
| 672 | BRCA1 | 8243  | SMC1L1  | L |
| 672 | BRCA1 | 8314  | BAP1    | L |
| 672 | BRCA1 | 8315  | BRAP    | L |
| 672 | BRCA1 | 8543  | LMO4    | L |
| 672 | BRCA1 | 8900  | CCNA1   | L |
| 672 | BRCA1 | 9111  | NMI     | L |
| 672 | BRCA1 | 10111 | RAD50   | L |
| 672 | BRCA1 | 11200 | CHEK2   | L |
| 672 | BRCA1 | 25920 | COBRA1  | L |
| 672 | BRCA1 | 59348 | ZNF350  | L |
| 672 | BRCA1 | 63967 | CLSPN   | L |
| 672 | BRCA1 | 83990 | BRIP1   | L |
| 672 | BRCA1 | 84168 | ANTXR1  | L |
| 673 | BRAF  | 3265  | HRAS    | L |
| 673 | BRAF  | 5604  | MAP2K1  | L |
| 673 | BRAF  | 5605  | MAP2K2  | L |

|     |         |       |          |   |
|-----|---------|-------|----------|---|
| 673 | BRAF    | 5894  | RAF1     | L |
| 673 | BRAF    | 7529  | YWHAB    | L |
| 673 | BRAF    | 7533  | YWHAH    | L |
| 673 | BRAF    | 7534  | YWHAZ    | L |
| 673 | BRAF    | 10971 | YWHAQ    | L |
| 673 | BRAF    | 22808 | MRAS     | L |
| 675 | BRCA2   | 701   | BUB1B    | L |
| 675 | BRCA2   | 2177  | FANCD2   | L |
| 675 | BRCA2   | 2189  | FANCG    | L |
| 675 | BRCA2   | 2316  | FLNA     | L |
| 675 | BRCA2   | 4088  | SMAD3    | L |
| 675 | BRCA2   | 5888  | RAD51    | L |
| 675 | BRCA2   | 6776  | STAT5A   | L |
| 675 | BRCA2   | 7157  | TP53     | L |
| 675 | BRCA2   | 7979  | SHFM1    | L |
| 675 | BRCA2   | 8850  | PCAF     | L |
| 675 | BRCA2   | 10362 | HMG20B   | L |
| 675 | BRCA2   | 56946 | C11orf30 | L |
| 677 | ZFP36L1 | 1432  | MAPK14   | R |
| 677 | ZFP36L1 | 5049  | PAFAH1B2 | S |
| 682 | BSG     | 4312  | MMP1     | L |
| 682 | BSG     | 6566  | SLC16A1  | L |
| 682 | BSG     | 9123  | SLC16A3  | L |
| 682 | BSG     | 9260  | PDLIM7   | R |
| 683 | BST1    | 857   | CAV1     | L |
| 685 | BTC     | 1956  | EGFR     | L |
| 685 | BTC     | 2064  | ERBB2    | L |
| 685 | BTC     | 2066  | ERBB4    | L |
| 685 | BTC     | 4318  | MMP9     | L |
| 687 | KLF9    | 5241  | PGR      | L |
| 688 | KLF5    | 1387  | CREBBP   | L |
| 688 | KLF5    | 2961  | GTF2E2   | L |
| 688 | KLF5    | 2963  | GTF2F2   | L |
| 688 | KLF5    | 4790  | NFKB1    | L |
| 689 | BTF3    | 1460  | CSNK2B   | L |
| 694 | BTG1    | 9337  | CNOT8    | R |
| 695 | BTK     | 857   | CAV1     | L |
| 695 | BTK     | 867   | CBL      | L |
| 695 | BTK     | 1820  | ARID3A   | L |
| 695 | BTK     | 2130  | EWSR1    | L |
| 695 | BTK     | 2768  | GNA12    | L |
| 695 | BTK     | 2776  | GNAQ     | L |
| 695 | BTK     | 2969  | GTF2I    | L |
| 695 | BTK     | 3055  | HCK      | L |
| 695 | BTK     | 3716  | JAK1     | L |
| 695 | BTK     | 4067  | LYN      | L |
| 695 | BTK     | 5587  | PRKD1    | L |
| 695 | BTK     | 7409  | VAV1     | L |
| 695 | BTK     | 7454  | WAS      | L |
| 695 | BTK     | 10163 | WASF2    | L |
| 695 | BTK     | 10657 | KHDRBS1  | L |
| 695 | BTK     | 25998 | IBTK     | L |
| 695 | BTK     | 29760 | BLNK     | L |
| 696 | BTN1A1  | 7498  | XDH      | L |
| 699 | BUB1    | 1398  | CRK      | R |
| 699 | BUB1    | 8546  | AP3B1    | L |
| 699 | BUB1    | 9184  | BUB3     | L |
| 699 | BUB1    | 10425 | ARIH2    | R |
| 699 | BUB1    | 10717 | AP4B1    | L |
| 701 | BUB1B   | 996   | CDC27    | L |
| 701 | BUB1B   | 1062  | CENPE    | L |
| 701 | BUB1B   | 4216  | MAP3K4   | L |
| 701 | BUB1B   | 6623  | SNCG     | L |
| 701 | BUB1B   | 7094  | TLN1     | L |
| 701 | BUB1B   | 8546  | AP3B1    | L |
| 701 | BUB1B   | 8881  | CDC16    | L |
| 701 | BUB1B   | 9184  | BUB3     | L |

|     |          |        |        |   |
|-----|----------|--------|--------|---|
| 701 | BUB1B    | 10717  | AP4B1  | L |
| 705 | BYSL     | 3856   | KRT8   | L |
| 705 | BYSL     | 4591   | TRIM37 | R |
| 705 | BYSL     | 7216   | TRO    | L |
| 705 | BYSL     | 10024  | TROAP  | L |
| 708 | C1QBP    | 2549   | GAB1   | L |
| 708 | C1QBP    | 3184   | HNRPD  | L |
| 708 | C1QBP    | 4323   | MMP14  | L |
| 708 | C1QBP    | 5578   | PRKCA  | L |
| 708 | C1QBP    | 5580   | PRKCD  | L |
| 708 | C1QBP    | 5587   | PRKD1  | L |
| 708 | C1QBP    | 5590   | PRKCZ  | L |
| 708 | C1QBP    | 5594   | MAPK1  | L |
| 708 | C1QBP    | 5595   | MAPK3  | L |
| 708 | C1QBP    | 6426   | SFRS1  | L |
| 708 | C1QBP    | 7916   | BAT2   | L |
| 708 | C1QBP    | 8739   | HRK    | L |
| 708 | C1QBP    | 118460 | EXOSC6 | L |
| 710 | SERPING1 | 715    | C1R    | L |
| 710 | SERPING1 | 716    | C1S    | L |
| 710 | SERPING1 | 1991   | ELA2   | L |
| 710 | SERPING1 | 2147   | F2     | L |
| 710 | SERPING1 | 5327   | PLAT   | L |
| 710 | SERPING1 | 5340   | PLG    | L |
| 710 | SERPING1 | 5648   | MASP1  | L |
| 710 | SERPING1 | 6401   | SELE   | L |
| 710 | SERPING1 | 6403   | SELP   | L |
| 710 | SERPING1 | 10747  | MASP2  | L |
| 712 | C1QA     | 713    | C1QB   | L |
| 712 | C1QA     | 714    | C1QG   | L |
| 712 | C1QA     | 715    | C1R    | L |
| 712 | C1QA     | 716    | C1S    | L |
| 712 | C1QA     | 1280   | COL2A1 | L |
| 712 | C1QA     | 1378   | CR1    | L |
| 712 | C1QA     | 1634   | DCN    | L |
| 712 | C1QA     | 2335   | FN1    | L |
| 712 | C1QA     | 3273   | HRG    | L |
| 712 | C1QA     | 5806   | PTX3   | L |
| 712 | C1QA     | 10114  | HIPK3  | L |
| 712 | C1QA     | 22918  | C1QR1  | L |
| 713 | C1QB     | 714    | C1QG   | L |
| 713 | C1QB     | 715    | C1R    | L |
| 713 | C1QB     | 1667   | DEFA1  | L |
| 713 | C1QB     | 3273   | HRG    | L |
| 713 | C1QB     | 5806   | PTX3   | L |
| 714 | C1QG     | 5806   | PTX3   | L |
| 715 | C1R      | 716    | C1S    | L |
| 717 | C2       | 718    | C3     | L |
| 717 | C2       | 721    | C4B    | L |
| 717 | C2       | 727    | C5     | L |
| 717 | C2       | 5648   | MASP1  | L |
| 717 | C2       | 5685   | PSMA4  | L |
| 718 | C3       | 719    | C3AR1  | L |
| 718 | C3       | 727    | C5     | L |
| 718 | C3       | 1369   | CPN1   | L |
| 718 | C3       | 1378   | CR1    | L |
| 718 | C3       | 1380   | CR2    | L |
| 718 | C3       | 2638   | GC     | L |
| 718 | C3       | 3075   | CFH    | L |
| 718 | C3       | 3426   | IF     | L |
| 718 | C3       | 3684   | ITGAM  | L |
| 718 | C3       | 3687   | ITGAX  | L |
| 718 | C3       | 4035   | LRP1   | L |
| 718 | C3       | 4179   | MCP    | L |
| 718 | C3       | 5069   | PAPPA  | L |
| 718 | C3       | 5199   | PFC    | L |
| 718 | C3       | 5648   | MASP1  | L |

|     |         |        |          |   |
|-----|---------|--------|----------|---|
| 718 | C3      | 10562  | OLFM4    | L |
| 718 | C3      | 10877  | CFHL4    | L |
| 718 | C3      | 10878  | CFHL3    | L |
| 718 | C3      | 81494  | CFHL5    | L |
| 719 | C3AR1   | 720    | C4A      | L |
| 720 | C4A     | 1378   | CR1      | L |
| 720 | C4A     | 1471   | CST3     | L |
| 721 | C4B     | 722    | C4BPA    | L |
| 721 | C4B     | 1378   | CR1      | L |
| 721 | C4B     | 1915   | EEF1A1   | L |
| 721 | C4B     | 4179   | MCP      | L |
| 722 | C4BPA   | 4035   | LRP1     | L |
| 722 | C4BPA   | 5627   | PROS1    | L |
| 727 | C5      | 728    | C5R1     | L |
| 727 | C5      | 729    | C6       | L |
| 727 | C5      | 730    | C7       | L |
| 727 | C5      | 732    | C8B      | L |
| 728 | C5R1    | 2771   | GNAI2    | L |
| 728 | C5R1    | 6223   | RPS19    | L |
| 729 | C6      | 2147   | F2       | L |
| 730 | C7      | 1191   | CLU      | L |
| 730 | C7      | 5340   | PLG      | L |
| 731 | C8A     | 732    | C8B      | L |
| 731 | C8A     | 735    | C9       | L |
| 731 | C8A     | 966    | CD59     | L |
| 732 | C8B     | 1191   | CLU      | L |
| 735 | C9      | 966    | CD59     | L |
| 735 | C9      | 1191   | CLU      | L |
| 752 | FMNL1   | 2547   | XRCC6    | S |
| 752 | FMNL1   | 5216   | PFN1     | L |
| 752 | FMNL1   | 5879   | RAC1     | L |
| 752 | FMNL1   | 7094   | TLN1     | L |
| 752 | FMNL1   | 55660  | FNBP3    | L |
| 754 | PTTG1IP | 9232   | PTTG1    | L |
| 760 | CA2     | 3329   | HSPD1    | L |
| 760 | CA2     | 6508   | SLC4A3   | L |
| 760 | CA2     | 6521   | SLC4A1   | L |
| 760 | CA2     | 6548   | SLC9A1   | L |
| 760 | CA2     | 8655   | DNCL1    | L |
| 760 | CA2     | 8671   | SLC4A4   | L |
| 760 | CA2     | 9498   | SLC4A8   | L |
| 760 | CA2     | 55139  | FLJ10415 | S |
| 760 | CA2     | 57540  | PTCHD2   | S |
| 762 | CA4     | 6508   | SLC4A3   | L |
| 762 | CA4     | 6521   | SLC4A1   | L |
| 765 | CA6     | 2217   | FCGRT    | L |
| 767 | CA8     | 3708   | ITPR1    | L |
| 767 | CA8     | 4034   | LRCH4    | S |
| 768 | CA9     | 999    | CDH1     | L |
| 768 | CA9     | 1499   | CTNNB1   | L |
| 771 | CA12    | 1523   | CUTL1    | S |
| 771 | CA12    | 3963   | LGALS7   | S |
| 771 | CA12    | 9905   | RUTBC1   | S |
| 771 | CA12    | 65005  | MRPL9    | S |
| 771 | CA12    | 79768  | C15orf29 | S |
| 771 | CA12    | 114034 | TOE1     | S |
| 773 | CACNA1A | 785    | CACNB4   | L |
| 773 | CACNA1A | 6857   | SYT1     | L |
| 774 | CACNA1B | 8573   | CASK     | L |
| 774 | CACNA1B | 10611  | PDLIM5   | L |
| 775 | CACNA1C | 5092   | PCBD1    | L |
| 775 | CACNA1C | 6262   | RYR2     | L |
| 775 | CACNA1C | 6717   | SRI      | L |
| 776 | CACNA1D | 2263   | FGFR2    | L |
| 776 | CACNA1D | 6804   | STX1A    | L |
| 777 | CACNA1E | 114327 | EFHC1    | L |
| 779 | CACNA1S | 6261   | RYR1     | L |

|     |          |        |          |   |
|-----|----------|--------|----------|---|
| 779 | CACNA1S  | 6717   | SRI      | L |
| 779 | CACNA1S  | 9699   | RIMS2    | L |
| 780 | DDR1     | 1280   | COL2A1   | L |
| 780 | DDR1     | 1281   | COL3A1   | L |
| 780 | DDR1     | 1290   | COL5A2   | L |
| 780 | DDR1     | 1301   | COL11A1  | L |
| 780 | DDR1     | 4071   | TM4SF1   | S |
| 780 | DDR1     | 5335   | PLCG1    | L |
| 780 | DDR1     | 5997   | RGS2     | S |
| 780 | DDR1     | 6464   | SHC1     | L |
| 780 | DDR1     | 7276   | TTR      | S |
| 780 | DDR1     | 9410   | WDR57    | S |
| 780 | DDR1     | 10818  | FRS2     | L |
| 780 | DDR1     | 23557  | SNAPAP   | S |
| 780 | DDR1     | 67621  | (null)   | S |
| 780 | DDR1     | 150421 | (null)   | S |
| 785 | CACNB4   | 5764   | PTN      | S |
| 785 | CACNB4   | 10607  | TBL3     | S |
| 785 | CACNB4   | 51003  | MED31    | S |
| 788 | SLC25A20 | 90861  | C16orf34 | S |
| 793 | CALB1    | 3612   | IMPA1    | L |
| 793 | CALB1    | 10048  | RANBP9   | L |
| 794 | CALB2    | 3848   | KRT1     | L |
| 794 | CALB2    | 7277   | TUBA1    | L |
| 796 | CALCA    | 799    | CALCR    | L |
| 796 | CALCA    | 10267  | RAMP1    | L |
| 799 | CALCR    | 4153   | MBL2     | L |
| 799 | CALCR    | 10267  | RAMP1    | L |
| 799 | CALCR    | 10268  | RAMP3    | L |
| 800 | CALD1    | 801    | CALM1    | L |
| 800 | CALD1    | 805    | CALM2    | L |
| 800 | CALD1    | 808    | CALM3    | L |
| 800 | CALD1    | 2885   | GRB2     | L |
| 800 | CALD1    | 6464   | SHC1     | L |
| 801 | CALM1    | 818    | CAMK2G   | L |
| 801 | CALM1    | 1130   | LYST     | L |
| 801 | CALM1    | 1264   | CNN1     | L |
| 801 | CALM1    | 1956   | EGFR     | L |
| 801 | CALM1    | 2099   | ESR1     | L |
| 801 | CALM1    | 2100   | ESR2     | L |
| 801 | CALM1    | 2596   | GAP43    | L |
| 801 | CALM1    | 2868   | GRK4     | L |
| 801 | CALM1    | 2915   | GRM5     | L |
| 801 | CALM1    | 2917   | GRM7     | L |
| 801 | CALM1    | 3320   | HSPCA    | L |
| 801 | CALM1    | 3781   | KCNN2    | L |
| 801 | CALM1    | 3785   | KCNQ2    | L |
| 801 | CALM1    | 3786   | KCNQ3    | L |
| 801 | CALM1    | 4137   | MAPT     | L |
| 801 | CALM1    | 4617   | MYF5     | L |
| 801 | CALM1    | 4618   | MYF6     | L |
| 801 | CALM1    | 4638   | MYLK     | L |
| 801 | CALM1    | 4650   | MYO9B    | L |
| 801 | CALM1    | 4654   | MYOD1    | L |
| 801 | CALM1    | 4656   | MYOG     | L |
| 801 | CALM1    | 4760   | NEUROD1  | L |
| 801 | CALM1    | 4988   | OPRM1    | L |
| 801 | CALM1    | 5136   | PDE1A    | L |
| 801 | CALM1    | 5260   | PHKG1    | L |
| 801 | CALM1    | 5470   | PPEF2    | L |
| 801 | CALM1    | 5475   | PPEF1    | L |
| 801 | CALM1    | 5865   | RAB3B    | L |
| 801 | CALM1    | 5898   | RALA     | L |
| 801 | CALM1    | 5899   | RALB     | L |
| 801 | CALM1    | 6011   | GRK1     | L |
| 801 | CALM1    | 6261   | RYR1     | L |
| 801 | CALM1    | 6622   | SNCA     | L |

|     |        |       |          |   |
|-----|--------|-------|----------|---|
| 801 | CALM1  | 6640  | SNTA1    | L |
| 801 | CALM1  | 6925  | TCF4     | L |
| 801 | CALM1  | 6929  | TCF3     | L |
| 801 | CALM1  | 7273  | TTN      | L |
| 801 | CALM1  | 7442  | TRPV1    | L |
| 801 | CALM1  | 7531  | YWHAE    | L |
| 801 | CALM1  | 8721  | EDF1     | L |
| 801 | CALM1  | 10788 | IQGAP2   | L |
| 805 | CALM2  | 2099  | ESR1     | L |
| 805 | CALM2  | 2100  | ESR2     | L |
| 805 | CALM2  | 2596  | GAP43    | L |
| 805 | CALM2  | 2915  | GRM5     | L |
| 805 | CALM2  | 2917  | GRM7     | L |
| 805 | CALM2  | 3785  | KCNQ2    | L |
| 805 | CALM2  | 3786  | KCNQ3    | L |
| 805 | CALM2  | 4082  | MARCKS   | L |
| 805 | CALM2  | 4617  | MYF5     | L |
| 805 | CALM2  | 4618  | MYF6     | L |
| 805 | CALM2  | 4646  | MYO6     | S |
| 805 | CALM2  | 4654  | MYOD1    | L |
| 805 | CALM2  | 4656  | MYOG     | L |
| 805 | CALM2  | 4760  | NEUROD1  | L |
| 805 | CALM2  | 5116  | PCNT2    | L |
| 805 | CALM2  | 5470  | PPEF2    | L |
| 805 | CALM2  | 5475  | PPEF1    | L |
| 805 | CALM2  | 5865  | RAB3B    | L |
| 805 | CALM2  | 5898  | RALA     | L |
| 805 | CALM2  | 5899  | RALB     | L |
| 805 | CALM2  | 6925  | TCF4     | L |
| 805 | CALM2  | 8721  | EDF1     | L |
| 805 | CALM2  | 55052 | MRPL20   | S |
| 805 | CALM2  | 80726 | KIAA1683 | R |
| 808 | CALM3  | 2099  | ESR1     | L |
| 808 | CALM3  | 2100  | ESR2     | L |
| 808 | CALM3  | 2915  | GRM5     | L |
| 808 | CALM3  | 2917  | GRM7     | L |
| 808 | CALM3  | 3785  | KCNQ2    | L |
| 808 | CALM3  | 3786  | KCNQ3    | L |
| 808 | CALM3  | 4617  | MYF5     | L |
| 808 | CALM3  | 4618  | MYF6     | L |
| 808 | CALM3  | 4654  | MYOD1    | L |
| 808 | CALM3  | 4656  | MYOG     | L |
| 808 | CALM3  | 4760  | NEUROD1  | L |
| 808 | CALM3  | 5470  | PPEF2    | L |
| 808 | CALM3  | 5475  | PPEF1    | L |
| 808 | CALM3  | 5540  | PPYR1    | L |
| 808 | CALM3  | 5865  | RAB3B    | L |
| 808 | CALM3  | 5898  | RALA     | L |
| 808 | CALM3  | 5899  | RALB     | L |
| 808 | CALM3  | 6925  | TCF4     | L |
| 808 | CALM3  | 6929  | TCF3     | L |
| 808 | CALM3  | 8721  | EDF1     | L |
| 810 | CALML3 | 4651  | MYO10    | L |
| 810 | CALML3 | 80726 | KIAA1683 | R |
| 811 | CALR   | 912   | CD1D     | L |
| 811 | CALR   | 2153  | F5       | L |
| 811 | CALR   | 2157  | F8       | L |
| 811 | CALR   | 2200  | FBN1     | L |
| 811 | CALR   | 2244  | FGB      | L |
| 811 | CALR   | 2908  | NR3C1    | L |
| 811 | CALR   | 2923  | PDIA3    | L |
| 811 | CALR   | 3107  | HLA-C    | L |
| 811 | CALR   | 3674  | ITGA2B   | L |
| 811 | CALR   | 3675  | ITGA3    | L |
| 811 | CALR   | 4035  | LRP1     | L |
| 811 | CALR   | 4153  | MBL2     | L |
| 811 | CALR   | 5327  | PLAT     | L |

|     |        |       |           |   |
|-----|--------|-------|-----------|---|
| 811 | CALR   | 5551  | PRF1      | L |
| 811 | CALR   | 6513  | SLC2A1    | L |
| 811 | CALR   | 6532  | SLC6A4    | L |
| 811 | CALR   | 7018  | TF        | L |
| 811 | CALR   | 7057  | THBS1     | L |
| 811 | CALR   | 7080  | TITF1     | L |
| 811 | CALR   | 7253  | TSHR      | L |
| 811 | CALR   | 7450  | VWF       | L |
| 811 | CALR   | 8578  | SCARF1    | L |
| 811 | CALR   | 64714 | PDIA2     | L |
| 814 | CAMK4  | 5970  | RELA      | L |
| 814 | CAMK4  | 10645 | CAMKK2    | L |
| 815 | CAMK2A | 2904  | GRIN2B    | L |
| 815 | CAMK2A | 3706  | ITPKA     | L |
| 815 | CAMK2A | 8851  | CDK5R1    | L |
| 815 | CAMK2A | 23604 | DAPK2     | L |
| 815 | CAMK2A | 57554 | LRRC7     | L |
| 817 | CAMK2D | 6222  | RPS18     | L |
| 818 | CAMK2G | 4088  | SMAD3     | L |
| 818 | CAMK2G | 4089  | SMAD4     | L |
| 818 | CAMK2G | 6236  | RRAD      | L |
| 818 | CAMK2G | 6772  | STAT1     | L |
| 818 | CAMK2G | 7074  | TIAM1     | L |
| 818 | CAMK2G | 51475 | CABP2     | L |
| 819 | CAMLG  | 1956  | EGFR      | L |
| 819 | CAMLG  | 5479  | PPIB      | L |
| 819 | CAMLG  | 23495 | TNFRSF13B | L |
| 820 | CAMP   | 1511  | CTSG      | L |
| 820 | CAMP   | 2358  | FPRL1     | L |
| 820 | CAMP   | 3929  | LBP       | L |
| 820 | CAMP   | 5657  | PRTN3     | L |
| 821 | CANX   | 912   | CD1D      | L |
| 821 | CANX   | 915   | CD3D      | L |
| 821 | CANX   | 1080  | CFTR      | L |
| 821 | CANX   | 1244  | ABCC2     | L |
| 821 | CANX   | 2157  | F8        | L |
| 821 | CANX   | 2890  | GRIA1     | L |
| 821 | CANX   | 3359  | HTR3A     | L |
| 821 | CANX   | 3655  | ITGA6     | L |
| 821 | CANX   | 3688  | ITGB1     | L |
| 821 | CANX   | 3732  | CD82      | L |
| 821 | CANX   | 3938  | LCT       | L |
| 821 | CANX   | 4018  | LPA       | L |
| 821 | CANX   | 4035  | LRP1      | L |
| 821 | CANX   | 5376  | PMP22     | L |
| 821 | CANX   | 5589  | PRKCSH    | L |
| 821 | CANX   | 6513  | SLC2A1    | L |
| 821 | CANX   | 6521  | SLC4A1    | L |
| 821 | CANX   | 6955  | TRA@      | L |
| 821 | CANX   | 7018  | TF        | L |
| 821 | CANX   | 7038  | TG        | L |
| 821 | CANX   | 7253  | TSHR      | L |
| 821 | CANX   | 8720  | MBTPS1    | L |
| 821 | CANX   | 9695  | EDEM1     | L |
| 821 | CANX   | 10134 | BCAP31    | L |
| 821 | CANX   | 11170 | TU3A      | S |
| 821 | CANX   | 64750 | SMURF2    | L |
| 822 | CAPG   | 23397 | BRRN1     | L |
| 823 | CAPN1  | 826   | CAPNS1    | L |
| 823 | CAPN1  | 831   | CAST      | L |
| 823 | CAPN1  | 3631  | INPP4A    | L |
| 823 | CAPN1  | 3827  | KNG1      | L |
| 823 | CAPN1  | 4792  | NFKBIA    | L |
| 823 | CAPN1  | 5664  | PSEN2     | L |
| 824 | CAPN2  | 826   | CAPNS1    | L |
| 824 | CAPN2  | 2620  | GAS2      | L |
| 824 | CAPN2  | 3827  | KNG1      | L |

|     |        |       |         |   |
|-----|--------|-------|---------|---|
| 824 | CAPN2  | 7145  | TNS1    | L |
| 825 | CAPN3  | 2318  | FLNC    | L |
| 825 | CAPN3  | 6709  | SPTAN1  | L |
| 825 | CAPN3  | 7273  | TTN     | L |
| 825 | CAPN3  | 54550 | EFCBP2  | R |
| 826 | CAPNS1 | 831   | CAST    | L |
| 826 | CAPNS1 | 1019  | CDK4    | S |
| 826 | CAPNS1 | 2783  | GNB2    | S |
| 826 | CAPNS1 | 3561  | IL2RG   | L |
| 826 | CAPNS1 | 4733  | DRG1    | S |
| 826 | CAPNS1 | 5861  | RAB1A   | S |
| 826 | CAPNS1 | 7013  | TERF1   | S |
| 826 | CAPNS1 | 9551  | ATP5J2  | S |
| 826 | CAPNS1 | 51608 | C7orf20 | S |
| 826 | CAPNS1 | 85444 | LRRCC1  | S |
| 829 | CAPZA1 | 6271  | S100A1  | L |
| 829 | CAPZA1 | 6285  | S100B   | L |
| 829 | CAPZA1 | 23607 | CD2AP   | L |
| 829 | CAPZA1 | 30011 | SH3KBP1 | L |
| 830 | CAPZA2 | 5829  | PXN     | L |
| 832 | CAPZB  | 5764  | PTN     | S |
| 832 | CAPZB  | 55052 | MRPL20  | S |
| 832 | CAPZB  | 56647 | BCCIP   | S |
| 833 | CARS   | 1937  | EEF1G   | L |
| 834 | CASP1  | 1956  | EGFR    | L |
| 834 | CASP1  | 3064  | HD      | L |
| 834 | CASP1  | 4287  | ATXN3   | L |
| 834 | CASP1  | 4780  | NFE2L2  | L |
| 834 | CASP1  | 5663  | PSEN1   | L |
| 834 | CASP1  | 8767  | RIPK2   | L |
| 834 | CASP1  | 10134 | BCAP31  | L |
| 834 | CASP1  | 10392 | CARD4   | L |
| 834 | CASP1  | 23581 | CASP14  | L |
| 834 | CASP1  | 29108 | PYCARD  | L |
| 834 | CASP1  | 58484 | CARD12  | L |
| 835 | CASP2  | 840   | CASP7   | L |
| 835 | CASP2  | 843   | CASP10  | L |
| 835 | CASP2  | 896   | CCND3   | L |
| 835 | CASP2  | 1639  | DCTN1   | L |
| 835 | CASP2  | 2802  | GOLGA3  | L |
| 835 | CASP2  | 3064  | HD      | L |
| 835 | CASP2  | 8738  | CRADD   | L |
| 835 | CASP2  | 8996  | NOL3    | L |
| 835 | CASP2  | 10392 | CARD4   | L |
| 835 | CASP2  | 22861 | NALP1   | L |
| 835 | CASP2  | 23581 | CASP14  | L |
| 835 | CASP2  | 51237 | PACAP   | L |
| 835 | CASP2  | 55367 | LRDD    | L |
| 836 | CASP3  | 1499  | CTNNB1  | L |
| 836 | CASP3  | 1630  | DCC     | L |
| 836 | CASP3  | 1639  | DCTN1   | L |
| 836 | CASP3  | 1676  | DFFA    | L |
| 836 | CASP3  | 1975  | EIF4B   | L |
| 836 | CASP3  | 3059  | HCLS1   | L |
| 836 | CASP3  | 3064  | HD      | L |
| 836 | CASP3  | 3329  | HSPD1   | L |
| 836 | CASP3  | 3336  | HSPE1   | L |
| 836 | CASP3  | 3856  | KRT8    | L |
| 836 | CASP3  | 3875  | KRT18   | L |
| 836 | CASP3  | 4001  | LMNB1   | L |
| 836 | CASP3  | 4287  | ATXN3   | L |
| 836 | CASP3  | 4719  | NDUFS1  | L |
| 836 | CASP3  | 4756  | NEO1    | L |
| 836 | CASP3  | 4780  | NFE2L2  | L |
| 836 | CASP3  | 5530  | PPP3CA  | L |
| 836 | CASP3  | 5663  | PSEN1   | L |
| 836 | CASP3  | 6721  | SREBF2  | L |



|     |       |        |           |   |
|-----|-------|--------|-----------|---|
| 836 | CASP3 | 6731   | SRP72     | L |
| 836 | CASP3 | 7052   | TGM2      | L |
| 836 | CASP3 | 7185   | TRAF1     | L |
| 836 | CASP3 | 7187   | TRAF3     | L |
| 836 | CASP3 | 7531   | YWHAE     | L |
| 836 | CASP3 | 8301   | PICALM    | L |
| 836 | CASP3 | 8505   | PARG      | L |
| 836 | CASP3 | 8615   | VDP       | L |
| 836 | CASP3 | 8837   | CFLAR     | L |
| 836 | CASP3 | 9191   | DEDD      | L |
| 836 | CASP3 | 9748   | SLK       | L |
| 836 | CASP3 | 30818  | CSEN      | L |
| 836 | CASP3 | 64689  | GORASP1   | L |
| 836 | CASP3 | 79444  | BIRC7     | L |
| 837 | CASP4 | 843    | CASP10    | L |
| 837 | CASP4 | 5272   | SERPINB9  | L |
| 837 | CASP4 | 5663   | PSEN1     | L |
| 837 | CASP4 | 10392  | CARD4     | L |
| 837 | CASP4 | 23581  | CASP14    | L |
| 838 | CASP5 | 51535  | PPHLN1    | L |
| 839 | CASP6 | 841    | CASP8     | L |
| 839 | CASP6 | 843    | CASP10    | L |
| 839 | CASP6 | 1107   | CHD3      | S |
| 839 | CASP6 | 3064   | HD        | L |
| 839 | CASP6 | 3329   | HSPD1     | L |
| 839 | CASP6 | 4001   | LMNB1     | L |
| 840 | CASP7 | 843    | CASP10    | L |
| 840 | CASP7 | 1639   | DCTN1     | L |
| 840 | CASP7 | 3064   | HD        | L |
| 840 | CASP7 | 3309   | HSPA5     | L |
| 840 | CASP7 | 5663   | PSEN1     | L |
| 840 | CASP7 | 7132   | TNFRSF1A  | L |
| 840 | CASP7 | 9616   | RNF7      | L |
| 840 | CASP7 | 64689  | GORASP1   | L |
| 840 | CASP7 | 79444  | BIRC7     | L |
| 841 | CASP8 | 843    | CASP10    | L |
| 841 | CASP8 | 999    | CDH1      | L |
| 841 | CASP8 | 1107   | CHD3      | S |
| 841 | CASP8 | 1147   | CHUK      | L |
| 841 | CASP8 | 1499   | CTNNB1    | L |
| 841 | CASP8 | 3064   | HD        | L |
| 841 | CASP8 | 3092   | HIP1      | L |
| 841 | CASP8 | 3551   | IKBKB     | L |
| 841 | CASP8 | 7024   | TFCP2     | S |
| 841 | CASP8 | 7431   | VIM       | S |
| 841 | CASP8 | 8301   | PICALM    | L |
| 841 | CASP8 | 8682   | PEA15     | L |
| 841 | CASP8 | 8717   | TRADD     | L |
| 841 | CASP8 | 8737   | RIPK1     | L |
| 841 | CASP8 | 8738   | CRADD     | L |
| 841 | CASP8 | 8767   | RIPK2     | L |
| 841 | CASP8 | 8772   | FADD      | L |
| 841 | CASP8 | 8795   | TNFRSF10B | L |
| 841 | CASP8 | 8797   | TNFRSF10A | L |
| 841 | CASP8 | 8837   | CFLAR     | L |
| 841 | CASP8 | 8996   | NOL3      | L |
| 841 | CASP8 | 9020   | MAP3K14   | L |
| 841 | CASP8 | 9191   | DEDD      | L |
| 841 | CASP8 | 9448   | MAP4K4    | L |
| 841 | CASP8 | 9971   | NR1H4     | L |
| 841 | CASP8 | 9994   | CASP8AP2  | L |
| 841 | CASP8 | 10134  | BCAP31    | L |
| 841 | CASP8 | 10392  | CARD4     | L |
| 841 | CASP8 | 23581  | CASP14    | L |
| 841 | CASP8 | 55081  | ESRRBL1   | L |
| 841 | CASP8 | 162989 | DEDD2     | L |
| 842 | CASP9 | 843    | CASP10    | L |

|     |        |        |          |   |
|-----|--------|--------|----------|---|
| 842 | CASP9  | 1630   | DCC      | L |
| 842 | CASP9  | 3002   | GZMB     | L |
| 842 | CASP9  | 4671   | BIRC1    | L |
| 842 | CASP9  | 5594   | MAPK1    | L |
| 842 | CASP9  | 5595   | MAPK3    | L |
| 842 | CASP9  | 10392  | CARD4    | L |
| 842 | CASP9  | 22861  | NALP1    | L |
| 842 | CASP9  | 54205  | CYCS     | L |
| 842 | CASP9  | 57448  | BIRC6    | L |
| 842 | CASP9  | 79444  | BIRC7    | L |
| 843 | CASP10 | 7132   | TNFRSF1A | L |
| 843 | CASP10 | 8772   | FADD     | L |
| 843 | CASP10 | 8837   | CFLAR    | L |
| 843 | CASP10 | 9191   | DEDD     | L |
| 843 | CASP10 | 23429  | RYBP     | L |
| 843 | CASP10 | 23581  | CASP14   | L |
| 843 | CASP10 | 162989 | DEDD2    | L |
| 845 | CASQ2  | 10345  | TRDN     | L |
| 846 | CASR   | 2316   | FLNA     | L |
| 857 | CAV1   | 858    | CAV2     | L |
| 857 | CAV1   | 1445   | CSK      | L |
| 857 | CAV1   | 1901   | EDG1     | L |
| 857 | CAV1   | 1910   | EDNRB    | L |
| 857 | CAV1   | 1956   | EGFR     | L |
| 857 | CAV1   | 2064   | ERBB2    | L |
| 857 | CAV1   | 2099   | ESR1     | L |
| 857 | CAV1   | 2316   | FLNA     | L |
| 857 | CAV1   | 2319   | FLOT2    | L |
| 857 | CAV1   | 2697   | GJA1     | L |
| 857 | CAV1   | 2700   | GJA3     | L |
| 857 | CAV1   | 2706   | GJB2     | L |
| 857 | CAV1   | 2869   | GRK5     | L |
| 857 | CAV1   | 3643   | INSR     | L |
| 857 | CAV1   | 4804   | NGFR     | L |
| 857 | CAV1   | 4843   | NOS2A    | L |
| 857 | CAV1   | 4846   | NOS3     | L |
| 857 | CAV1   | 4914   | NTRK1    | L |
| 857 | CAV1   | 5156   | PDGFRA   | L |
| 857 | CAV1   | 5338   | PLD2     | L |
| 857 | CAV1   | 5499   | PPP1CA   | L |
| 857 | CAV1   | 5621   | PRNP     | L |
| 857 | CAV1   | 5728   | PTEN     | L |
| 857 | CAV1   | 5743   | PTGS2    | L |
| 857 | CAV1   | 5770   | PTPN1    | L |
| 857 | CAV1   | 5777   | PTPN6    | L |
| 857 | CAV1   | 5781   | PTPN11   | L |
| 857 | CAV1   | 5792   | PTPRF    | L |
| 857 | CAV1   | 5957   | RCV1     | L |
| 857 | CAV1   | 6011   | GRK1     | L |
| 857 | CAV1   | 6342   | SCP2     | L |
| 857 | CAV1   | 7046   | TGFBR1   | L |
| 857 | CAV1   | 7133   | TNFRSF1B | L |
| 857 | CAV1   | 7186   | TRAF2    | L |
| 857 | CAV1   | 8165   | AKAP1    | L |
| 857 | CAV1   | 8717   | TRADD    | L |
| 857 | CAV1   | 10825  | NEU3     | L |
| 858 | CAV2   | 2319   | FLOT2    | L |
| 858 | CAV2   | 2804   | GOLGB1   | S |
| 858 | CAV2   | 4690   | NCK1     | L |
| 859 | CAV3   | 1605   | DAG1     | L |
| 859 | CAV3   | 1956   | EGFR     | L |
| 859 | CAV3   | 2778   | GNAS     | L |
| 859 | CAV3   | 4842   | NOS1     | L |
| 859 | CAV3   | 5213   | PFKM     | L |
| 859 | CAV3   | 6546   | SLC8A1   | L |
| 859 | CAV3   | 8291   | DYSF     | L |
| 860 | RUNX2  | 1051   | CEBPB    | L |

|     |         |        |           |   |
|-----|---------|--------|-----------|---|
| 860 | RUNX2   | 2113   | ETS1      | L |
| 860 | RUNX2   | 2353   | FOS       | L |
| 860 | RUNX2   | 3725   | JUN       | L |
| 860 | RUNX2   | 4087   | SMAD2     | L |
| 860 | RUNX2   | 4088   | SMAD3     | L |
| 860 | RUNX2   | 4488   | MSX2      | L |
| 860 | RUNX2   | 8841   | HDAC3     | L |
| 860 | RUNX2   | 10013  | HDAC6     | L |
| 860 | RUNX2   | 10413  | YAP1      | L |
| 860 | RUNX2   | 23522  | MYST4     | L |
| 861 | RUNX1   | 863    | CBFA2T3   | L |
| 861 | RUNX1   | 865    | CBFB      | L |
| 861 | RUNX1   | 1051   | CEBPB     | L |
| 861 | RUNX1   | 2000   | ELF4      | L |
| 861 | RUNX1   | 2353   | FOS       | L |
| 861 | RUNX1   | 3725   | JUN       | L |
| 861 | RUNX1   | 5079   | PAX5      | L |
| 861 | RUNX1   | 6839   | SUV39H1   | L |
| 861 | RUNX1   | 7088   | TLE1      | L |
| 861 | RUNX1   | 7089   | TLE2      | L |
| 861 | RUNX1   | 9139   | CBFA2T2   | L |
| 861 | RUNX1   | 23522  | MYST4     | L |
| 861 | RUNX1   | 25937  | WWTR1     | L |
| 862 | RUNX1T1 | 863    | CBFA2T3   | L |
| 862 | RUNX1T1 | 2672   | GFI1      | L |
| 862 | RUNX1T1 | 3065   | HDAC1     | L |
| 862 | RUNX1T1 | 3320   | HSPCA     | L |
| 862 | RUNX1T1 | 3836   | KPNA1     | L |
| 862 | RUNX1T1 | 3837   | KPNB1     | L |
| 862 | RUNX1T1 | 6925   | TCF4      | L |
| 862 | RUNX1T1 | 6929   | TCF3      | L |
| 862 | RUNX1T1 | 6938   | TCF12     | L |
| 862 | RUNX1T1 | 7704   | ZBTB16    | L |
| 862 | RUNX1T1 | 8841   | HDAC3     | L |
| 862 | RUNX1T1 | 9139   | CBFA2T2   | L |
| 862 | RUNX1T1 | 9611   | NCOR1     | L |
| 862 | RUNX1T1 | 9612   | NCOR2     | L |
| 862 | RUNX1T1 | 25942  | SIN3A     | L |
| 862 | RUNX1T1 | 51225  | ABI3      | R |
| 862 | RUNX1T1 | 51616  | TAF9L     | R |
| 862 | RUNX1T1 | 51729  | WBP11     | R |
| 862 | RUNX1T1 | 54550  | EFCBP2    | R |
| 862 | RUNX1T1 | 55869  | HDAC8     | L |
| 862 | RUNX1T1 | 79173  | MGC11271  | R |
| 862 | RUNX1T1 | 220766 | KIAA0470L | R |
| 863 | CBFA2T3 | 3065   | HDAC1     | L |
| 863 | CBFA2T3 | 5576   | PRKAR2A   | L |
| 863 | CBFA2T3 | 8841   | HDAC3     | L |
| 863 | CBFA2T3 | 9139   | CBFA2T2   | L |
| 864 | RUNX3   | 865    | CBFB      | L |
| 864 | RUNX3   | 7088   | TLE1      | L |
| 865 | CBFB    | 1114   | CHGB      | S |
| 865 | CBFB    | 9139   | CBFA2T2   | L |
| 867 | CBL     | 921    | CD5       | L |
| 867 | CBL     | 930    | CD19      | L |
| 867 | CBL     | 1399   | ORKL      | L |
| 867 | CBL     | 1436   | CSF1R     | L |
| 867 | CBL     | 1445   | CSK       | L |
| 867 | CBL     | 2051   | EPHB6     | L |
| 867 | CBL     | 2185   | PTK2B     | L |
| 867 | CBL     | 2268   | FGR       | L |
| 867 | CBL     | 2534   | FYN       | L |
| 867 | CBL     | 2885   | GRB2      | L |
| 867 | CBL     | 3055   | HCK       | L |
| 867 | CBL     | 3636   | INPPL1    | L |
| 867 | CBL     | 3702   | ITK       | L |
| 867 | CBL     | 3875   | KRT18     | L |

|     |          |        |          |   |
|-----|----------|--------|----------|---|
| 867 | CBL      | 3932   | LCK      | L |
| 867 | CBL      | 3937   | LCP2     | L |
| 867 | CBL      | 4058   | LTK      | L |
| 867 | CBL      | 4067   | LYN      | L |
| 867 | CBL      | 4233   | MET      | L |
| 867 | CBL      | 4641   | MYO1C    | L |
| 867 | CBL      | 4643   | MYO1E    | L |
| 867 | CBL      | 5296   | PIK3R2   | L |
| 867 | CBL      | 5777   | PTPN6    | L |
| 867 | CBL      | 6456   | SH3GL2   | L |
| 867 | CBL      | 6457   | SH3GL3   | L |
| 867 | CBL      | 6464   | SHC1     | L |
| 867 | CBL      | 6503   | SLA      | L |
| 867 | CBL      | 6714   | SRC      | L |
| 867 | CBL      | 6850   | SYK      | L |
| 867 | CBL      | 7297   | TYK2     | L |
| 867 | CBL      | 7322   | UBE2D2   | L |
| 867 | CBL      | 7326   | UBE2G1   | L |
| 867 | CBL      | 7327   | UBE2G2   | L |
| 867 | CBL      | 7332   | UBE2L3   | L |
| 867 | CBL      | 7409   | VAV1     | L |
| 867 | CBL      | 7410   | VAV2     | L |
| 867 | CBL      | 7535   | ZAP70    | L |
| 867 | CBL      | 10211  | FLOT1    | L |
| 867 | CBL      | 10253  | SPRY2    | L |
| 867 | CBL      | 10580  | SORBS1   | L |
| 867 | CBL      | 10818  | FRS2     | L |
| 867 | CBL      | 10971  | YWHAQ    | L |
| 867 | CBL      | 23607  | CD2AP    | L |
| 867 | CBL      | 26191  | PTPN22   | L |
| 867 | CBL      | 26578  | OSTF1    | L |
| 867 | CBL      | 30011  | SH3KBP1  | L |
| 867 | CBL      | 84174  | SLA2     | L |
| 868 | CBLB     | 1399   | CRKL     | L |
| 868 | CBLB     | 1407   | CRY1     | R |
| 868 | CBLB     | 1956   | EGFR     | L |
| 868 | CBLB     | 2322   | FLT3     | L |
| 868 | CBLB     | 2885   | GRB2     | L |
| 868 | CBLB     | 4690   | NCK1     | L |
| 868 | CBLB     | 4734   | NEDD4    | L |
| 868 | CBLB     | 5336   | PLCG2    | L |
| 868 | CBLB     | 6464   | SHC1     | L |
| 868 | CBLB     | 6850   | SYK      | L |
| 868 | CBLB     | 7409   | VAV1     | L |
| 868 | CBLB     | 7535   | ZAP70    | L |
| 868 | CBLB     | 8440   | NCK2     | R |
| 868 | CBLB     | 10174  | SORBS3   | R |
| 868 | CBLB     | 26003  | GORASP2  | R |
| 868 | CBLB     | 26994  | RNF11    | L |
| 868 | CBLB     | 29760  | BLNK     | L |
| 868 | CBLB     | 30011  | SH3KBP1  | L |
| 871 | SERPINH1 | 928    | CD9      | L |
| 871 | SERPINH1 | 5829   | PXN      | L |
| 871 | SERPINH1 | 7343   | UBTF     | L |
| 871 | SERPINH1 | 7414   | VCL      | L |
| 871 | SERPINH1 | 51621  | KLF13    | L |
| 871 | SERPINH1 | 54978  | C2orf18  | S |
| 873 | CBR1     | 1161   | ERCC8    | S |
| 874 | CBR3     | 10425  | ARIH2    | S |
| 874 | CBR3     | 11021  | RAB35    | S |
| 875 | CBS      | 3064   | HD       | L |
| 875 | CBS      | 9513   | FXR2     | R |
| 875 | CBS      | 51534  | C6orf55  | R |
| 875 | CBS      | 283987 | C17orf28 | R |
| 885 | CCK      | 886    | CCKAR    | L |
| 889 | KRIT1    | 5906   | RAP1A    | L |
| 889 | KRIT1    | 9270   | ITGB1BP1 | L |

|     |       |       |         |    |
|-----|-------|-------|---------|----|
| 890 | CCNA2 | 983   | CDC2    | L  |
| 890 | CCNA2 | 990   | CDC6    | L  |
| 890 | CCNA2 | 991   | CDC20   | L  |
| 890 | CCNA2 | 995   | CDC25C  | L  |
| 890 | CCNA2 | 1017  | CDK2    | L  |
| 890 | CCNA2 | 1018  | CDK3    | L  |
| 890 | CCNA2 | 1027  | CDKN1B  | L  |
| 890 | CCNA2 | 1869  | E2F1    | L  |
| 890 | CCNA2 | 4605  | MYBL2   | L  |
| 890 | CCNA2 | 5757  | PTMA    | L  |
| 890 | CCNA2 | 5933  | RBL1    | L  |
| 890 | CCNA2 | 5934  | RBL2    | L  |
| 890 | CCNA2 | 6500  | SKP1A   | L  |
| 890 | CCNA2 | 6502  | SKP2    | L  |
| 890 | CCNA2 | 6872  | TAF1    | L  |
| 890 | CCNA2 | 7157  | TP53    | L  |
| 890 | CCNA2 | 7290  | HIRA    | L  |
| 890 | CCNA2 | 7343  | UBTF    | L  |
| 890 | CCNA2 | 23421 | ITGB3BP | L  |
| 890 | CCNA2 | 51191 | HERC5   | L  |
| 891 | CCNB1 | 899   | CCNF    | L  |
| 891 | CCNB1 | 993   | CDC25A  | L  |
| 891 | CCNB1 | 995   | CDC25C  | L  |
| 891 | CCNB1 | 4134  | MAP4    | L  |
| 891 | CCNB1 | 4616  | GADD45B | L  |
| 891 | CCNB1 | 5111  | PCNA    | L  |
| 891 | CCNB1 | 5300  | PIN1    | L  |
| 891 | CCNB1 | 5757  | PTMA    | L  |
| 891 | CCNB1 | 5891  | RAGE    | L  |
| 891 | CCNB1 | 7048  | TGFBR2  | L  |
| 891 | CCNB1 | 7088  | TLE1    | L  |
| 891 | CCNB1 | 7248  | TSC1    | L  |
| 891 | CCNB1 | 10912 | GADD45G | L  |
| 891 | CCNB1 | 10928 | RALBP1  | L  |
| 891 | CCNB1 | 51191 | HERC5   | L  |
| 891 | CCNB1 | 51343 | FZR1    | L  |
| 892 | CCNC  | 5430  | POLR2A  | L  |
| 894 | CCND2 | 1019  | CDK4    | L  |
| 894 | CCND2 | 1020  | CDK5    | L  |
| 894 | CCND2 | 1021  | CDK6    | L  |
| 894 | CCND2 | 1026  | CDKN1A  | R  |
| 894 | CCND2 | 1027  | CDKN1B  | R  |
| 894 | CCND2 | 9988  | DMTF1   | L  |
| 894 | CCND2 | 10270 | AKAP8   | L  |
| 896 | CCND3 | 984   | CDC2L1  | L  |
| 896 | CCND3 | 1019  | CDK4    | RL |
| 896 | CCND3 | 1021  | CDK6    | L  |
| 896 | CCND3 | 1026  | CDKN1A  | RL |
| 896 | CCND3 | 1027  | CDKN1B  | RL |
| 896 | CCND3 | 1382  | CRABP2  | L  |
| 896 | CCND3 | 5111  | PCNA    | L  |
| 896 | CCND3 | 5914  | RARA    | L  |
| 896 | CCND3 | 9988  | DMTF1   | L  |
| 896 | CCND3 | 10270 | AKAP8   | L  |
| 896 | CCND3 | 27335 | EIF3S12 | L  |
| 896 | CCND3 | 30008 | EFEMP2  | R  |
| 896 | CCND3 | 55388 | MCM10   | L  |
| 896 | CCND3 | 84062 | DTNBP1  | R  |
| 896 | CCND3 | 84232 | MAF1    | R  |
| 898 | CCNE1 | 983   | CDC2    | L  |
| 898 | CCNE1 | 993   | CDC25A  | L  |
| 898 | CCNE1 | 1018  | CDK3    | L  |
| 898 | CCNE1 | 5934  | RBL2    | L  |
| 898 | CCNE1 | 5966  | REL     | L  |
| 898 | CCNE1 | 6502  | SKP2    | L  |
| 898 | CCNE1 | 6597  | SMARCA4 | L  |
| 898 | CCNE1 | 6599  | SMARCC1 | L  |

|     |       |        |         |   |
|-----|-------|--------|---------|---|
| 898 | CCNE1 | 8161   | COIL    | L |
| 898 | CCNE1 | 8452   | CUL3    | L |
| 898 | CCNE1 | 10575  | CCT4    | L |
| 898 | CCNE1 | 51191  | HERC5   | L |
| 898 | CCNE1 | 55294  | FBXW7   | L |
| 900 | CCNG1 | 1020   | CDK5    | L |
| 900 | CCNG1 | 1029   | CDKN2A  | L |
| 900 | CCNG1 | 2580   | GAK     | L |
| 900 | CCNG1 | 4193   | MDM2    | L |
| 900 | CCNG1 | 5524   | PPP2R4  | L |
| 900 | CCNG1 | 7157   | TP53    | L |
| 901 | CCNG2 | 5515   | PPP2CA  | L |
| 901 | CCNG2 | 5524   | PPP2R4  | L |
| 902 | CCNH  | 2071   | ERCC3   | L |
| 902 | CCNH  | 2961   | GTF2E2  | L |
| 902 | CCNH  | 4176   | MCM7    | L |
| 902 | CCNH  | 5682   | PSMA1   | R |
| 902 | CCNH  | 8880   | FUBP1   | L |
| 902 | CCNH  | 9112   | MTA1    | L |
| 902 | CCNH  | 10534  | SSSCA1  | R |
| 902 | CCNH  | 404672 | GTF2H5  | L |
| 904 | CCNT1 | 2896   | GRN     | L |
| 904 | CCNT1 | 4609   | MYC     | L |
| 904 | CCNT1 | 5371   | PML     | L |
| 904 | CCNT1 | 5813   | PURA    | L |
| 904 | CCNT1 | 6502   | SKP2    | L |
| 904 | CCNT1 | 10614  | HEXIM1  | L |
| 904 | CCNT1 | 27125  | AFF4    | L |
| 904 | CCNT1 | 27336  | HTATSF1 | L |
| 905 | CCNT2 | 5925   | RB1     | L |
| 905 | CCNT2 | 10614  | HEXIM1  | L |
| 912 | CD1D  | 972    | CD74    | L |
| 912 | CD1D  | 5788   | PTPRC   | L |
| 914 | CD2   | 919    | CD3Z    | L |
| 914 | CD2   | 920    | CD4     | L |
| 914 | CD2   | 921    | CD5     | L |
| 914 | CD2   | 962    | CD48    | L |
| 914 | CD2   | 963    | CD53    | L |
| 914 | CD2   | 965    | CD58    | L |
| 914 | CD2   | 966    | CD59    | L |
| 914 | CD2   | 2534   | FYN     | L |
| 914 | CD2   | 3932   | LCK     | L |
| 914 | CD2   | 3956   | LGALS1  | L |
| 914 | CD2   | 4084   | MXD1    | L |
| 914 | CD2   | 5788   | PTPRC   | L |
| 914 | CD2   | 6667   | SP1     | L |
| 914 | CD2   | 9051   | PSTPIP1 | L |
| 914 | CD2   | 10421  | CD2BP2  | L |
| 914 | CD2   | 23607  | CD2AP   | L |
| 914 | CD2   | 30011  | SH3KBP1 | L |
| 915 | CD3D  | 919    | CD3Z    | L |
| 915 | CD3D  | 925    | CD8A    | L |
| 915 | CD3D  | 926    | CD8B1   | L |
| 916 | CD3E  | 919    | CD3Z    | L |
| 916 | CD3E  | 974    | CD79B   | L |
| 916 | CD3E  | 3932   | LCK     | L |
| 916 | CD3E  | 5295   | PIK3R1  | L |
| 916 | CD3E  | 6464   | SHC1    | L |
| 916 | CD3E  | 6850   | SYK     | L |
| 916 | CD3E  | 7155   | TOP2B   | L |
| 916 | CD3E  | 7535   | ZAP70   | L |
| 916 | CD3E  | 8440   | NCK2    | L |
| 916 | CD3E  | 10849  | CD3EAP  | L |
| 917 | CD3G  | 6955   | TRA@    | L |
| 917 | CD3G  | 6964   | TRD@    | L |
| 919 | CD3Z  | 921    | CD5     | L |
| 919 | CD3Z  | 940    | CD28    | L |

|     |      |        |           |   |
|-----|------|--------|-----------|---|
| 919 | CD3Z | 1445   | CSK       | L |
| 919 | CD3Z | 1794   | DOCK2     | L |
| 919 | CD3Z | 2534   | FYN       | L |
| 919 | CD3Z | 3718   | JAK3      | L |
| 919 | CD3Z | 4061   | LY6E      | L |
| 919 | CD3Z | 5788   | PTPRC     | L |
| 919 | CD3Z | 6464   | SHC1      | L |
| 919 | CD3Z | 6503   | SLA       | L |
| 919 | CD3Z | 6776   | STAT5A    | L |
| 919 | CD3Z | 6777   | STAT5B    | L |
| 919 | CD3Z | 6955   | TRA@      | L |
| 919 | CD3Z | 7037   | TFRC      | L |
| 919 | CD3Z | 7535   | ZAP70     | L |
| 919 | CD3Z | 9094   | UNC119    | L |
| 919 | CD3Z | 9437   | NCR1      | L |
| 919 | CD3Z | 9846   | GAB2      | L |
| 919 | CD3Z | 10019  | LNK       | L |
| 919 | CD3Z | 50852  | TRAT1     | L |
| 919 | CD3Z | 84174  | SLA2      | L |
| 919 | CD3Z | 114609 | TIRAP     | L |
| 919 | CD3Z | 259197 | NCR3      | L |
| 920 | CD4  | 921    | CD5       | L |
| 920 | CD4  | 940    | CD28      | L |
| 920 | CD4  | 952    | CD38      | L |
| 920 | CD4  | 960    | CD44      | L |
| 920 | CD4  | 963    | CD53      | L |
| 920 | CD4  | 1234   | CCR5      | L |
| 920 | CD4  | 1509   | CTSD      | L |
| 920 | CD4  | 1803   | DPP4      | L |
| 920 | CD4  | 2214   | FCGR3A    | L |
| 920 | CD4  | 3113   | HLA-DPA1  | L |
| 920 | CD4  | 3118   | HLA-DQA2  | L |
| 920 | CD4  | 3119   | HLA-DQB1  | L |
| 920 | CD4  | 3559   | IL2RA     | L |
| 920 | CD4  | 3603   | IL16      | L |
| 920 | CD4  | 3732   | CD82      | L |
| 920 | CD4  | 3932   | LCK       | L |
| 920 | CD4  | 3956   | LGALS1    | L |
| 920 | CD4  | 5295   | PIK3R1    | L |
| 920 | CD4  | 5297   | PIK4CA    | L |
| 920 | CD4  | 5304   | PIP       | L |
| 920 | CD4  | 5747   | PTK2      | L |
| 920 | CD4  | 5788   | PTPRC     | L |
| 920 | CD4  | 6387   | CXCL12    | L |
| 920 | CD4  | 6402   | SELL      | L |
| 920 | CD4  | 6520   | SLC3A2    | L |
| 920 | CD4  | 7037   | TFRC      | L |
| 920 | CD4  | 8797   | TNFRSF10A | L |
| 920 | CD4  | 8945   | BTRC      | L |
| 920 | CD4  | 9094   | UNC119    | L |
| 920 | CD4  | 27040  | LAT       | L |
| 920 | CD4  | 51324  | SPG21     | L |
| 921 | CD5  | 923    | CD6       | L |
| 921 | CD5  | 971    | CD72      | L |
| 921 | CD5  | 3932   | LCK       | L |
| 921 | CD5  | 5295   | PIK3R1    | L |
| 921 | CD5  | 5777   | PTPN6     | L |
| 921 | CD5  | 5921   | RASA1     | L |
| 921 | CD5  | 6990   | TCTE1L    | L |
| 921 | CD5  | 7535   | ZAP70     | L |
| 924 | CD7  | 3956   | LGALS1    | L |
| 924 | CD7  | 5295   | PIK3R1    | L |
| 924 | CD7  | 5297   | PIK4CA    | L |
| 924 | CD7  | 6398   | SECTM1    | L |
| 925 | CD8A | 926    | CD8B1     | L |
| 925 | CD8A | 3105   | HLA-A     | L |
| 925 | CD8A | 3106   | HLA-B     | L |

|     |         |       |          |   |
|-----|---------|-------|----------|---|
| 925 | CD8A    | 3107  | HLA-C    | L |
| 925 | CD8A    | 3133  | HLA-E    | L |
| 925 | CD8A    | 3135  | HLA-G    | L |
| 925 | CD8A    | 3956  | LGALS1   | L |
| 925 | CD8A    | 5788  | PTPRC    | L |
| 925 | CD8A    | 27040 | LAT      | L |
| 928 | CD9     | 930   | CD19     | L |
| 928 | CD9     | 948   | CD36     | L |
| 928 | CD9     | 963   | CD53     | L |
| 928 | CD9     | 966   | CD59     | L |
| 928 | CD9     | 967   | CD63     | L |
| 928 | CD9     | 975   | CD81     | L |
| 928 | CD9     | 1839  | HBEGF    | L |
| 928 | CD9     | 2515  | ADAM2    | L |
| 928 | CD9     | 3678  | ITGA5    | L |
| 928 | CD9     | 3815  | KIT      | L |
| 928 | CD9     | 5578  | PRKCA    | L |
| 928 | CD9     | 5738  | PTGFRN   | L |
| 928 | CD9     | 7106  | TSPAN4   | L |
| 928 | CD9     | 93185 | IGSF8    | L |
| 929 | CD14    | 1604  | DAF      | L |
| 929 | CD14    | 3684  | ITGAM    | L |
| 929 | CD14    | 3689  | ITGB2    | L |
| 929 | CD14    | 3929  | LBP      | L |
| 929 | CD14    | 3959  | LGALS3BP | L |
| 929 | CD14    | 4057  | LTF      | L |
| 929 | CD14    | 7097  | TLR2     | L |
| 929 | CD14    | 7099  | TLR4     | L |
| 930 | CD19    | 933   | CD22     | L |
| 930 | CD19    | 973   | CD79A    | L |
| 930 | CD19    | 974   | CD79B    | L |
| 930 | CD19    | 975   | CD81     | L |
| 930 | CD19    | 1380  | CR2      | L |
| 930 | CD19    | 2534  | FYN      | L |
| 930 | CD19    | 3732  | CD82     | L |
| 930 | CD19    | 4067  | LYN      | L |
| 930 | CD19    | 5295  | PIK3R1   | L |
| 930 | CD19    | 6850  | SYK      | L |
| 930 | CD19    | 7409  | VAV1     | L |
| 930 | CD19    | 7410  | VAV2     | L |
| 931 | MS4A1   | 958   | CD40     | L |
| 931 | MS4A1   | 2534  | FYN      | L |
| 932 | MS4A3   | 1017  | CDK2     | L |
| 932 | MS4A3   | 1033  | CDKN3    | L |
| 933 | CD22    | 1173  | AP2M1    | L |
| 933 | CD22    | 2885  | GRB2     | L |
| 933 | CD22    | 3240  | HP       | L |
| 933 | CD22    | 4067  | LYN      | L |
| 933 | CD22    | 5295  | PIK3R1   | L |
| 933 | CD22    | 5335  | PLCG1    | L |
| 933 | CD22    | 5777  | PTPN6    | L |
| 933 | CD22    | 5788  | PTPRC    | L |
| 933 | CD22    | 6464  | SHC1     | L |
| 933 | CD22    | 6850  | SYK      | L |
| 934 | CD24    | 2268  | FGR      | L |
| 934 | CD24    | 4067  | LYN      | L |
| 934 | CD24    | 6403  | SELP     | L |
| 939 | TNFRSF7 | 7186  | TRAF2    | L |
| 939 | TNFRSF7 | 7187  | TRAF3    | L |
| 939 | TNFRSF7 | 7188  | TRAF5    | L |
| 940 | CD28    | 941   | CD80     | L |
| 940 | CD28    | 942   | CD86     | L |
| 940 | CD28    | 2885  | GRB2     | L |
| 940 | CD28    | 3592  | IL12A    | L |
| 940 | CD28    | 3702  | ITK      | L |
| 940 | CD28    | 3932  | LCK      | L |
| 940 | CD28    | 4905  | NSF      | L |



|     |         |       |          |   |
|-----|---------|-------|----------|---|
| 940 | CD28    | 5295  | PIK3R1   | L |
| 940 | CD28    | 5296  | PIK3R2   | L |
| 940 | CD28    | 5335  | PLCG1    | L |
| 940 | CD28    | 5788  | PTPRC    | L |
| 940 | CD28    | 9402  | GRAP2    | L |
| 940 | CD28    | 10233 | B7       | L |
| 940 | CD28    | 11072 | DUSP14   | L |
| 941 | CD80    | 1493  | CTLA4    | L |
| 942 | CD86    | 1493  | CTLA4    | L |
| 943 | TNFRSF8 | 944   | TNFSF8   | L |
| 943 | TNFRSF8 | 7185  | TRAF1    | L |
| 943 | TNFRSF8 | 7186  | TRAF2    | L |
| 943 | TNFRSF8 | 7187  | TRAF3    | L |
| 943 | TNFRSF8 | 7188  | TRAF5    | L |
| 943 | TNFRSF8 | 10293 | TRIP     | L |
| 943 | TNFRSF8 | 51567 | TTRAP    | L |
| 945 | CD33    | 5777  | PTPN6    | L |
| 945 | CD33    | 5781  | PTPN11   | L |
| 947 | CD34    | 1399  | CRKL     | L |
| 948 | CD36    | 1277  | COL1A1   | L |
| 948 | CD36    | 1278  | COL1A2   | L |
| 948 | CD36    | 2534  | FYN      | L |
| 948 | CD36    | 3655  | ITGA6    | L |
| 948 | CD36    | 3674  | ITGA2B   | L |
| 948 | CD36    | 3688  | ITGB1    | L |
| 948 | CD36    | 3690  | ITGB3    | L |
| 948 | CD36    | 4067  | LYN      | L |
| 948 | CD36    | 4145  | MATK     | L |
| 948 | CD36    | 6714  | SRC      | L |
| 948 | CD36    | 7057  | THBS1    | L |
| 948 | CD36    | 7525  | YES1     | L |
| 949 | SCARB1  | 5174  | PDZK1    | L |
| 950 | SCARB2  | 1176  | AP3S1    | L |
| 950 | SCARB2  | 7057  | THBS1    | L |
| 952 | CD38    | 2214  | FCGR3A   | L |
| 952 | CD38    | 3932  | LCK      | L |
| 952 | CD38    | 5175  | PECAM1   | L |
| 958 | CD40    | 959   | CD40LG   | L |
| 958 | CD40    | 2547  | XRCC6    | L |
| 958 | CD40    | 7185  | TRAF1    | L |
| 958 | CD40    | 7186  | TRAF2    | L |
| 958 | CD40    | 7187  | TRAF3    | L |
| 958 | CD40    | 7188  | TRAF5    | L |
| 958 | CD40    | 7189  | TRAF6    | L |
| 958 | CD40    | 7520  | XRCC5    | L |
| 958 | CD40    | 8439  | NSMAF    | L |
| 958 | CD40    | 8767  | RIPK2    | L |
| 958 | CD40    | 10758 | TRAF3IP2 | L |
| 958 | CD40    | 51567 | TTRAP    | L |
| 959 | CD40LG  | 3500  | IGHG1    | L |
| 960 | CD44    | 972   | CD74     | L |
| 960 | CD44    | 1277  | COL1A1   | L |
| 960 | CD44    | 1278  | COL1A2   | L |
| 960 | CD44    | 1445  | CSK      | L |
| 960 | CD44    | 1462  | CSPG2    | L |
| 960 | CD44    | 1758  | DMP1     | L |
| 960 | CD44    | 1839  | HBEGF    | L |
| 960 | CD44    | 1956  | EGFR     | L |
| 960 | CD44    | 2066  | ERBB4    | L |
| 960 | CD44    | 2247  | FGF2     | L |
| 960 | CD44    | 2534  | FYN      | L |
| 960 | CD44    | 3486  | IGFBP3   | L |
| 960 | CD44    | 3932  | LCK      | L |
| 960 | CD44    | 4316  | MMP7     | L |
| 960 | CD44    | 4318  | MMP9     | L |
| 960 | CD44    | 4771  | NF2      | L |
| 960 | CD44    | 5552  | PRG1     | L |

|     |       |        |         |   |
|-----|-------|--------|---------|---|
| 960 | CD44  | 6401   | SELE    | L |
| 960 | CD44  | 6696   | SPP1    | L |
| 960 | CD44  | 7046   | TGFBR1  | L |
| 960 | CD44  | 7048   | TGFBR2  | L |
| 960 | CD44  | 7074   | TIAM1   | L |
| 960 | CD44  | 7373   | COL14A1 | L |
| 960 | CD44  | 7410   | VAV2    | L |
| 960 | CD44  | 7430   | VIL2    | L |
| 960 | CD44  | 8174   | MADCAM1 | L |
| 960 | CD44  | 9138   | ARHGEF1 | L |
| 961 | CD47  | 2038   | EPB42   | L |
| 961 | CD47  | 2770   | GNAI1   | L |
| 961 | CD47  | 5029   | P2RY2   | L |
| 961 | CD47  | 5747   | PTK2    | L |
| 961 | CD47  | 6005   | RHAG    | L |
| 961 | CD47  | 7057   | THBS1   | L |
| 961 | CD47  | 140885 | PTPNS1  | L |
| 962 | CD48  | 1936   | EEF1D   | S |
| 962 | CD48  | 2534   | FYN     | L |
| 962 | CD48  | 2773   | GNAI3   | L |
| 962 | CD48  | 3932   | LCK     | L |
| 962 | CD48  | 55299  | BXDC2   | S |
| 963 | CD53  | 2678   | GGT1    | L |
| 963 | CD53  | 3558   | IL2     | L |
| 963 | CD53  | 3565   | IL4     | L |
| 965 | CD58  | 3301   | DNAJA1  | S |
| 965 | CD58  | 9709   | HERPUD1 | S |
| 966 | CD59  | 2773   | GNAI3   | L |
| 966 | CD59  | 4089   | SMAD4   | L |
| 966 | CD59  | 6535   | SLC6A8  | L |
| 966 | CD59  | 6714   | SRC     | L |
| 966 | CD59  | 9437   | NCR1    | L |
| 966 | CD59  | 259197 | NCR3    | L |
| 967 | CD63  | 3109   | HLA-DMB | L |
| 967 | CD63  | 3122   | HLA-DRA | L |
| 967 | CD63  | 3655   | ITGA6   | L |
| 967 | CD63  | 3732   | CD82    | L |
| 967 | CD63  | 3815   | KIT     | L |
| 967 | CD63  | 5738   | PTGFRN  | L |
| 967 | CD63  | 9179   | AP4M1   | L |
| 971 | CD72  | 2885   | GRB2    | L |
| 971 | CD72  | 5777   | PTPN6   | L |
| 971 | CD72  | 10507  | SEMA4D  | L |
| 971 | CD72  | 29760  | BLNK    | L |
| 972 | CD74  | 3108   | HLA-DMA | L |
| 972 | CD74  | 3109   | HLA-DMB | L |
| 972 | CD74  | 4282   | MIF     | L |
| 973 | CD79A | 974    | CD79B   | L |
| 973 | CD79A | 2204   | FCAR    | L |
| 973 | CD79A | 3059   | HCLS1   | L |
| 973 | CD79A | 3507   | IGHM    | L |
| 973 | CD79A | 3512   | IGJ     | L |
| 973 | CD79A | 5284   | PIGR    | L |
| 973 | CD79A | 5788   | PTPRC   | L |
| 973 | CD79A | 6850   | SYK     | L |
| 973 | CD79A | 29760  | BLNK    | L |
| 975 | CD81  | 3676   | ITGA4   | L |
| 975 | CD81  | 3815   | KIT     | L |
| 975 | CD81  | 7704   | ZBTB16  | S |
| 975 | CD81  | 9231   | DLG5    | S |
| 975 | CD81  | 83444  | ZNHIT4  | S |
| 975 | CD81  | 93185  | IGSF8   | L |
| 976 | CD97  | 1604   | DAF     | L |
| 977 | CD151 | 5738   | PTGFRN  | L |
| 983 | CDC2  | 995    | CDC25C  | L |
| 983 | CDC2  | 1033   | CDKN3   | L |
| 983 | CDC2  | 1163   | CKS1B   | L |

|     |        |       |          |   |
|-----|--------|-------|----------|---|
| 983 | CDC2   | 1164  | CKS2     | L |
| 983 | CDC2   | 1601  | DAB2     | L |
| 983 | CDC2   | 1647  | GADD45A  | L |
| 983 | CDC2   | 1785  | DNM2     | L |
| 983 | CDC2   | 1936  | EEF1D    | L |
| 983 | CDC2   | 2068  | ERCC2    | L |
| 983 | CDC2   | 2176  | FANCC    | L |
| 983 | CDC2   | 2534  | FYN      | L |
| 983 | CDC2   | 2810  | SFN      | L |
| 983 | CDC2   | 4001  | LMNB1    | L |
| 983 | CDC2   | 4067  | LYN      | L |
| 983 | CDC2   | 4616  | GADD45B  | L |
| 983 | CDC2   | 5300  | PIN1     | L |
| 983 | CDC2   | 5757  | PTMA     | L |
| 983 | CDC2   | 7088  | TLE1     | L |
| 983 | CDC2   | 7157  | TP53     | L |
| 983 | CDC2   | 7248  | TSC1     | L |
| 983 | CDC2   | 7704  | ZBTB16   | L |
| 983 | CDC2   | 8208  | CHAF1B   | L |
| 983 | CDC2   | 8900  | CCNA1    | L |
| 983 | CDC2   | 9088  | PKMYT1   | L |
| 983 | CDC2   | 9113  | LATS1    | L |
| 983 | CDC2   | 9133  | CCNB2    | L |
| 983 | CDC2   | 9600  | PITPNM1  | L |
| 983 | CDC2   | 10600 | USP16    | L |
| 983 | CDC2   | 10615 | SPAG5    | L |
| 983 | CDC2   | 10912 | GADD45G  | L |
| 983 | CDC2   | 11178 | LZTS1    | L |
| 983 | CDC2   | 29883 | CNOT7    | L |
| 983 | CDC2   | 64689 | GORASP1  | L |
| 984 | CDC2L1 | 81605 | C9orf74  | S |
| 984 | CDC2L1 | 81669 | CCNL2    | L |
| 985 | CDC2L2 | 2683  | B4GALT1  | L |
| 985 | CDC2L2 | 5058  | PAK1     | L |
| 985 | CDC2L2 | 6432  | SFRS7    | L |
| 985 | CDC2L2 | 6499  | SKIV2L   | L |
| 985 | CDC2L2 | 10921 | RNPS1    | L |
| 985 | CDC2L2 | 57018 | CCNL1    | L |
| 988 | CDC5L  | 1026  | CDKN1A   | L |
| 988 | CDC5L  | 1029  | CDKN2A   | L |
| 988 | CDC5L  | 4172  | MCM3     | L |
| 988 | CDC5L  | 4173  | MCM4     | L |
| 988 | CDC5L  | 4174  | MCM5     | L |
| 988 | CDC5L  | 4998  | ORC1L    | L |
| 988 | CDC5L  | 4999  | ORC2L    | L |
| 988 | CDC5L  | 5001  | ORC5L    | L |
| 988 | CDC5L  | 5356  | PLRG1    | L |
| 988 | CDC5L  | 5511  | PPP1R8   | L |
| 988 | CDC5L  | 8458  | TTF2     | L |
| 988 | CDC5L  | 55388 | MCM10    | L |
| 988 | CDC5L  | 81620 | CDT1     | L |
| 989 | SEPT7  | 10435 | CDC42EP2 | L |
| 989 | SEPT7  | 10801 | SEPT9    | L |
| 989 | SEPT7  | 54443 | ANLN     | L |
| 990 | CDC6   | 1026  | CDKN1A   | L |
| 990 | CDC6   | 1029  | CDKN2A   | L |
| 990 | CDC6   | 4171  | MCM2     | L |
| 990 | CDC6   | 4172  | MCM3     | L |
| 990 | CDC6   | 4176  | MCM7     | L |
| 990 | CDC6   | 4609  | MYC      | L |
| 990 | CDC6   | 4998  | ORC1L    | L |
| 990 | CDC6   | 4999  | ORC2L    | L |
| 990 | CDC6   | 5001  | ORC5L    | L |
| 990 | CDC6   | 5111  | PCNA     | L |
| 990 | CDC6   | 5523  | PPP2R3A  | L |
| 990 | CDC6   | 23594 | ORC6L    | L |
| 990 | CDC6   | 23595 | ORC3L    | L |

|     |        |       |         |   |
|-----|--------|-------|---------|---|
| 990 | CDC6   | 26993 | AKAP8L  | L |
| 990 | CDC6   | 28227 | PPP2R3B | L |
| 990 | CDC6   | 55388 | MCM10   | L |
| 990 | CDC6   | 81620 | CDT1    | L |
| 991 | CDC20  | 996   | CDC27   | L |
| 991 | CDC20  | 4085  | MAD2L1  | L |
| 991 | CDC20  | 6790  | STK6    | L |
| 991 | CDC20  | 8881  | CDC16   | L |
| 991 | CDC20  | 9232  | PTTG1   | L |
| 991 | CDC20  | 26271 | FBXO5   | L |
| 993 | CDC25A | 1017  | CDK2    | L |
| 993 | CDC25A | 1033  | CDKN3   | L |
| 993 | CDC25A | 1111  | CHEK1   | L |
| 993 | CDC25A | 1523  | CUTL1   | L |
| 993 | CDC25A | 1956  | EGFR    | L |
| 993 | CDC25A | 3265  | HRAS    | L |
| 993 | CDC25A | 4217  | MAP3K5  | L |
| 993 | CDC25A | 5292  | PIM1    | L |
| 993 | CDC25A | 5894  | RAF1    | L |
| 993 | CDC25A | 6093  | ROCK1   | L |
| 993 | CDC25A | 7529  | YWHAB   | L |
| 993 | CDC25A | 7531  | YWHAE   | L |
| 993 | CDC25A | 7534  | YWHAZ   | L |
| 993 | CDC25A | 8260  | ARD1A   | R |
| 993 | CDC25A | 8900  | CCNA1   | L |
| 994 | CDC25B | 1111  | CHEK1   | L |
| 994 | CDC25B | 1387  | CREBBP  | L |
| 994 | CDC25B | 1460  | CSNK2B  | L |
| 994 | CDC25B | 2099  | ESR1    | L |
| 994 | CDC25B | 7529  | YWHAB   | L |
| 994 | CDC25B | 7531  | YWHAE   | L |
| 994 | CDC25B | 7533  | YWHAH   | L |
| 994 | CDC25B | 7534  | YWHAZ   | L |
| 994 | CDC25B | 8850  | PCAF    | L |
| 994 | CDC25B | 9833  | MELK    | L |
| 994 | CDC25B | 10971 | YWHAQ   | L |
| 995 | CDC25C | 1111  | CHEK1   | L |
| 995 | CDC25C | 1263  | PLK3    | L |
| 995 | CDC25C | 1432  | MAPK14  | L |
| 995 | CDC25C | 3932  | LCK     | L |
| 995 | CDC25C | 4734  | NEDD4   | L |
| 995 | CDC25C | 5111  | PCNA    | L |
| 995 | CDC25C | 5300  | PIN1    | L |
| 995 | CDC25C | 5347  | PLK1    | L |
| 995 | CDC25C | 7157  | TP53    | L |
| 995 | CDC25C | 7533  | YWHAH   | L |
| 995 | CDC25C | 7534  | YWHAZ   | L |
| 996 | CDC27  | 3226  | HOXC10  | L |
| 996 | CDC27  | 4085  | MAD2L1  | L |
| 996 | CDC27  | 4087  | SMAD2   | L |
| 996 | CDC27  | 4088  | SMAD3   | L |
| 996 | CDC27  | 5300  | PIN1    | L |
| 996 | CDC27  | 5536  | PPP5C   | L |
| 996 | CDC27  | 6498  | SKIL    | L |
| 996 | CDC27  | 8881  | CDC16   | L |
| 996 | CDC27  | 51433 | ANAPC5  | L |
| 997 | CDC34  | 1390  | CREM    | L |
| 997 | CDC34  | 1460  | CSNK2B  | L |
| 997 | CDC34  | 4605  | MYBL2   | L |
| 997 | CDC34  | 4654  | MYOD1   | L |
| 997 | CDC34  | 6502  | SKP2    | L |
| 997 | CDC34  | 22809 | ATF5    | L |
| 998 | CDC42  | 1464  | CSPG4   | L |
| 998 | CDC42  | 1937  | EEF1G   | S |
| 998 | CDC42  | 2245  | FGD1    | L |
| 998 | CDC42  | 2316  | FLNA    | L |
| 998 | CDC42  | 2664  | GDI1    | L |

|     |       |        |          |   |
|-----|-------|--------|----------|---|
| 998 | CDC42 | 3895   | KTN1     | L |
| 998 | CDC42 | 4216   | MAP3K4   | L |
| 998 | CDC42 | 4294   | MAP3K10  | L |
| 998 | CDC42 | 4296   | MAP3K11  | L |
| 998 | CDC42 | 4649   | MYO9A    | S |
| 998 | CDC42 | 4688   | NCF2     | L |
| 998 | CDC42 | 4983   | OPHN1    | L |
| 998 | CDC42 | 5058   | PAK1     | L |
| 998 | CDC42 | 5062   | PAK2     | L |
| 998 | CDC42 | 5147   | PDE6D    | S |
| 998 | CDC42 | 5295   | PIK3R1   | L |
| 998 | CDC42 | 5337   | PLD1     | L |
| 998 | CDC42 | 5578   | PRKCA    | L |
| 998 | CDC42 | 5880   | RAC2     | L |
| 998 | CDC42 | 6198   | RPS6KB1  | L |
| 998 | CDC42 | 6453   | ITSN1    | L |
| 998 | CDC42 | 7157   | TP53     | S |
| 998 | CDC42 | 7409   | VAV1     | L |
| 998 | CDC42 | 7454   | WAS      | L |
| 998 | CDC42 | 8826   | IQGAP1   | L |
| 998 | CDC42 | 8936   | WASF1    | L |
| 998 | CDC42 | 8976   | WASL     | L |
| 998 | CDC42 | 9094   | UNC119   | S |
| 998 | CDC42 | 9322   | TRIP10   | L |
| 998 | CDC42 | 10096  | ACTR3    | L |
| 998 | CDC42 | 10163  | WASF2    | L |
| 998 | CDC42 | 10188  | TNK2     | L |
| 998 | CDC42 | 10298  | PAK4     | L |
| 998 | CDC42 | 10435  | CDC42EP2 | L |
| 998 | CDC42 | 10458  | BAIAP2   | L |
| 998 | CDC42 | 10524  | HTATIP   | S |
| 998 | CDC42 | 10602  | CDC42EP3 | L |
| 998 | CDC42 | 10788  | IQGAP2   | L |
| 998 | CDC42 | 11135  | CDC42EP1 | R |
| 998 | CDC42 | 11161  | C14orf1  | S |
| 998 | CDC42 | 23263  | MCF2L    | L |
| 998 | CDC42 | 23348  | DOCK9    | L |
| 998 | CDC42 | 50619  | DEF6     | L |
| 998 | CDC42 | 50855  | PARD6A   | L |
| 998 | CDC42 | 54206  | ERRF1    | L |
| 998 | CDC42 | 55791  | C1orf103 | S |
| 998 | CDC42 | 56288  | PARD3    | L |
| 998 | CDC42 | 56924  | PAK6     | L |
| 998 | CDC42 | 57144  | PAK7     | L |
| 998 | CDC42 | 57381  | RHOJ     | L |
| 998 | CDC42 | 57522  | SRGAP1   | L |
| 998 | CDC42 | 81704  | DOCK8    | L |
| 998 | CDC42 | 84218  | TBC1D3   | L |
| 998 | CDC42 | 84552  | PARD6G   | L |
| 998 | CDC42 | 197131 | UBR1     | S |
| 999 | CDH1  | 1434   | CSE1L    | L |
| 999 | CDH1  | 1499   | CTNNB1   | L |
| 999 | CDH1  | 1500   | CTNND1   | L |
| 999 | CDH1  | 1739   | DLG1     | L |
| 999 | CDH1  | 1956   | EGFR     | L |
| 999 | CDH1  | 2768   | GNA12    | L |
| 999 | CDH1  | 3667   | IRS1     | L |
| 999 | CDH1  | 3728   | JUP      | L |
| 999 | CDH1  | 5310   | PKD1     | L |
| 999 | CDH1  | 5663   | PSEN1    | L |
| 999 | CDH1  | 5784   | PTPN14   | L |
| 999 | CDH1  | 5792   | PTPRF    | L |
| 999 | CDH1  | 7430   | VIL2     | L |
| 999 | CDH1  | 8826   | IQGAP1   | L |
| 999 | CDH1  | 10096  | ACTR3    | L |
| 999 | CDH1  | 10672  | GNA13    | L |
| 999 | CDH1  | 51762  | RAB8B    | L |

|      |       |       |         |   |
|------|-------|-------|---------|---|
| 999  | CDH1  | 55591 | VEZATIN | L |
| 999  | CDH1  | 55914 | ERBB2IP | L |
| 999  | CDH1  | 79872 | CBLL1   | L |
| 1000 | CDH2  | 1002  | CDH4    | L |
| 1000 | CDH2  | 1009  | CDH11   | L |
| 1000 | CDH2  | 1495  | CTNNA1  | L |
| 1000 | CDH2  | 2768  | GNA12   | L |
| 1000 | CDH2  | 2898  | GRIK2   | L |
| 1000 | CDH2  | 3728  | JUP     | L |
| 1000 | CDH2  | 5770  | PTPN1   | L |
| 1000 | CDH2  | 10672 | GNA13   | L |
| 1000 | CDH2  | 57554 | LRRC7   | L |
| 1001 | CDH3  | 1499  | CTNNB1  | L |
| 1001 | CDH3  | 1500  | CTNND1  | L |
| 1003 | CDH5  | 1495  | CTNNA1  | L |
| 1003 | CDH5  | 1499  | CTNNB1  | L |
| 1003 | CDH5  | 1500  | CTNND1  | L |
| 1003 | CDH5  | 1832  | DSP     | L |
| 1003 | CDH5  | 2243  | FGA     | L |
| 1003 | CDH5  | 3728  | JUP     | L |
| 1003 | CDH5  | 3791  | KDR     | L |
| 1003 | CDH5  | 5025  | P2RX4   | L |
| 1003 | CDH5  | 5781  | PTPN11  | L |
| 1003 | CDH5  | 5787  | PTPRB   | L |
| 1003 | CDH5  | 6464  | SHC1    | L |
| 1003 | CDH5  | 7431  | VIM     | L |
| 1003 | CDH5  | 8502  | PKP4    | L |
| 1003 | CDH5  | 9127  | P2RXL1  | L |
| 1003 | CDH5  | 23049 | SMG1    | L |
| 1004 | CDH6  | 1008  | CDH10   | L |
| 1004 | CDH6  | 1016  | CDH18   | L |
| 1004 | CDH6  | 28513 | CDH19   | L |
| 1006 | CDH8  | 1499  | CTNNB1  | L |
| 1008 | CDH10 | 5764  | PTN     | S |
| 1008 | CDH10 | 10980 | COPS6   | S |
| 1009 | CDH11 | 1499  | CTNNB1  | L |
| 1009 | CDH11 | 55729 | ATF7IP  | L |
| 1010 | CDH12 | 1016  | CDH18   | L |
| 1013 | CDH15 | 1499  | CTNNB1  | L |
| 1013 | CDH15 | 2768  | GNA12   | L |
| 1013 | CDH15 | 3728  | JUP     | L |
| 1017 | CDK2  | 1026  | CDKN1A  | L |
| 1017 | CDK2  | 1027  | CDKN1B  | L |
| 1017 | CDK2  | 1033  | CDKN3   | L |
| 1017 | CDK2  | 1050  | CEBPA   | L |
| 1017 | CDK2  | 1163  | CKS1B   | L |
| 1017 | CDK2  | 1869  | E2F1    | L |
| 1017 | CDK2  | 2237  | FEN1    | L |
| 1017 | CDK2  | 2946  | GSTM2   | L |
| 1017 | CDK2  | 4067  | LYN     | L |
| 1017 | CDK2  | 4087  | SMAD2   | L |
| 1017 | CDK2  | 4088  | SMAD3   | L |
| 1017 | CDK2  | 4172  | MCM3    | L |
| 1017 | CDK2  | 4999  | ORC2L   | L |
| 1017 | CDK2  | 5583  | PRKCH   | L |
| 1017 | CDK2  | 5757  | PTMA    | L |
| 1017 | CDK2  | 5925  | RB1     | L |
| 1017 | CDK2  | 5933  | RBL1    | L |
| 1017 | CDK2  | 5934  | RBL2    | L |
| 1017 | CDK2  | 6502  | SKP2    | L |
| 1017 | CDK2  | 7343  | UBTF    | L |
| 1017 | CDK2  | 8099  | CDK2AP1 | L |
| 1017 | CDK2  | 8208  | CHAF1B  | L |
| 1017 | CDK2  | 8900  | CCNA1   | L |
| 1017 | CDK2  | 9133  | CCNB2   | L |
| 1017 | CDK2  | 9134  | CCNE2   | L |
| 1017 | CDK2  | 29883 | CNOT7   | L |

|      |        |       |         |     |
|------|--------|-------|---------|-----|
| 1017 | CDK2   | 85417 | CCNB3   | L   |
| 1018 | CDK3   | 1033  | CDKN3   | L   |
| 1018 | CDK3   | 1163  | CKS1B   | L   |
| 1018 | CDK3   | 1869  | E2F1    | L   |
| 1018 | CDK3   | 1870  | E2F2    | L   |
| 1018 | CDK3   | 1871  | E2F3    | L   |
| 1019 | CDK4   | 1026  | CDKN1A  | L   |
| 1019 | CDK4   | 1027  | CDKN1B  | L   |
| 1019 | CDK4   | 1029  | CDKN2A  | L   |
| 1019 | CDK4   | 1030  | CDKN2B  | RSL |
| 1019 | CDK4   | 1031  | CDKN2C  | L   |
| 1019 | CDK4   | 1032  | CDKN2D  | R   |
| 1019 | CDK4   | 1050  | CEBPA   | L   |
| 1019 | CDK4   | 3429  | IFI27   | L   |
| 1019 | CDK4   | 4087  | SMAD2   | L   |
| 1019 | CDK4   | 4088  | SMAD3   | L   |
| 1019 | CDK4   | 4171  | MCM2    | L   |
| 1019 | CDK4   | 4654  | MYOD1   | L   |
| 1019 | CDK4   | 5716  | PSMD10  | L   |
| 1019 | CDK4   | 5757  | PTMA    | L   |
| 1019 | CDK4   | 5925  | RB1     | L   |
| 1019 | CDK4   | 5981  | RFC1    | L   |
| 1019 | CDK4   | 5984  | RFC4    | L   |
| 1019 | CDK4   | 7917  | BAT3    | S   |
| 1019 | CDK4   | 8317  | CDC7    | L   |
| 1019 | CDK4   | 9869  | SETDB1  | S   |
| 1019 | CDK4   | 11140 | CDC37   | L   |
| 1019 | CDK4   | 29883 | CNOT7   | L   |
| 1019 | CDK4   | 51534 | C6orf55 | R   |
| 1019 | CDK4   | 79159 | MGC3731 | S   |
| 1020 | CDK5   | 1499  | CTNNB1  | L   |
| 1020 | CDK5   | 2580  | GAK     | L   |
| 1020 | CDK5   | 6418  | SET     | L   |
| 1020 | CDK5   | 6804  | STX1A   | L   |
| 1020 | CDK5   | 6812  | STXBP1  | L   |
| 1020 | CDK5   | 8851  | CDK5R1  | L   |
| 1020 | CDK5   | 8941  | CDK5R2  | L   |
| 1020 | CDK5   | 10763 | NES     | L   |
| 1021 | CDK6   | 1026  | CDKN1A  | L   |
| 1021 | CDK6   | 1029  | CDKN2A  | L   |
| 1021 | CDK6   | 1031  | CDKN2C  | L   |
| 1021 | CDK6   | 1032  | CDKN2D  | L   |
| 1021 | CDK6   | 4171  | MCM2    | L   |
| 1021 | CDK6   | 5111  | PCNA    | L   |
| 1021 | CDK6   | 5495  | PPM1B   | L   |
| 1021 | CDK6   | 29883 | CNOT7   | L   |
| 1021 | CDK6   | 55388 | MCM10   | L   |
| 1022 | CDK7   | 5914  | RARA    | L   |
| 1022 | CDK7   | 7067  | THRA    | L   |
| 1022 | CDK7   | 7421  | VDR     | L   |
| 1024 | CDK8   | 1030  | CDKN2B  | L   |
| 1026 | CDKN1A | 1027  | CDKN1B  | L   |
| 1026 | CDKN1A | 1387  | CREBBP  | L   |
| 1026 | CDKN1A | 1460  | CSNK2B  | L   |
| 1026 | CDKN1A | 1647  | GADD45A | L   |
| 1026 | CDKN1A | 4616  | GADD45B | L   |
| 1026 | CDKN1A | 5111  | PCNA    | RL  |
| 1026 | CDKN1A | 5292  | PIM1    | L   |
| 1026 | CDKN1A | 5425  | POLD2   | L   |
| 1026 | CDKN1A | 5684  | PSMA3   | L   |
| 1026 | CDKN1A | 5861  | RAB1A   | S   |
| 1026 | CDKN1A | 6418  | SET     | L   |
| 1026 | CDKN1A | 6774  | STAT3   | L   |
| 1026 | CDKN1A | 7083  | TK1     | L   |
| 1026 | CDKN1A | 7251  | TSG101  | L   |
| 1026 | CDKN1A | 8317  | CDC7    | L   |
| 1026 | CDKN1A | 8318  | CDC45L  | L   |

|      |        |        |               |   |
|------|--------|--------|---------------|---|
| 1026 | CDKN1A | 8402   | SLC25A11      | S |
| 1026 | CDKN1A | 8900   | CCNA1         | L |
| 1026 | CDKN1A | 9133   | CCNB2         | L |
| 1026 | CDKN1A | 9134   | CCNE2         | L |
| 1026 | CDKN1A | 10399  | GNB2L1        | S |
| 1026 | CDKN1A | 10912  | GADD45G       | L |
| 1026 | CDKN1A | 11007  | DIPA          | R |
| 1026 | CDKN1A | 23093  | TLL5          | S |
| 1026 | CDKN1A | 27231  | ITGB1BP3      | S |
| 1026 | CDKN1A | 51053  | GMNN          | L |
| 1026 | CDKN1A | 51608  | C7orf20       | S |
| 1026 | CDKN1A | 54987  | C1orf123      | S |
| 1026 | CDKN1A | 55388  | MCM10         | L |
| 1026 | CDKN1A | 56159  | TEX11         | R |
| 1026 | CDKN1A | 79885  | HDAC11        | S |
| 1026 | CDKN1A | 115106 | CCDC5         | L |
| 1027 | CDKN1B | 2885   | GRB2          | L |
| 1027 | CDKN1B | 6502   | SKP2          | L |
| 1027 | CDKN1B | 7186   | TRAF2         | R |
| 1027 | CDKN1B | 7345   | UCHL1         | L |
| 1027 | CDKN1B | 7514   | XPO1          | L |
| 1027 | CDKN1B | 7531   | YWHAE         | L |
| 1027 | CDKN1B | 7533   | YWHAH         | L |
| 1027 | CDKN1B | 8900   | CCNA1         | L |
| 1027 | CDKN1B | 9134   | CCNE2         | L |
| 1027 | CDKN1B | 10762  | NUP50         | L |
| 1027 | CDKN1B | 10971  | YWHAQ         | L |
| 1028 | CDKN1C | 3984   | LIMK1         | L |
| 1028 | CDKN1C | 4654   | MYOD1         | L |
| 1028 | CDKN1C | 5111   | PCNA          | L |
| 1028 | CDKN1C | 6502   | SKP2          | L |
| 1029 | CDKN2A | 1031   | CDKN2C        | L |
| 1029 | CDKN2A | 1877   | E4F1          | L |
| 1029 | CDKN2A | 3091   | HIF1A         | L |
| 1029 | CDKN2A | 4171   | MCM2          | L |
| 1029 | CDKN2A | 4174   | MCM5          | L |
| 1029 | CDKN2A | 4193   | MDM2          | L |
| 1029 | CDKN2A | 5000   | ORC4L         | L |
| 1029 | CDKN2A | 5702   | PSMC3         | L |
| 1029 | CDKN2A | 7528   | YY1           | L |
| 1029 | CDKN2A | 8317   | CDC7          | L |
| 1029 | CDKN2A | 8318   | CDC45L        | L |
| 1029 | CDKN2A | 51053  | GMNN          | L |
| 1029 | CDKN2A | 55388  | MCM10         | L |
| 1029 | CDKN2A | 55602  | CARF          | L |
| 1029 | CDKN2A | 84687  | PPP1R9B       | L |
| 1029 | CDKN2A | 115106 | CCDC5         | L |
| 1030 | CDKN2B | 4110   | MAGEA11       | R |
| 1030 | CDKN2B | 7709   | ZBTB17        | L |
| 1030 | CDKN2B | 8099   | CDK2AP1       | L |
| 1030 | CDKN2B | 8518   | IKBKAP        | S |
| 1030 | CDKN2B | 10094  | ARPC3         | S |
| 1030 | CDKN2B | 57562  | KIAA1377      | S |
| 1030 | CDKN2B | 60492  | MDS025        | S |
| 1031 | CDKN2C | 2661   | GDF9          | S |
| 1031 | CDKN2C | 4809   | NHP2L1        | S |
| 1031 | CDKN2C | 7088   | TLE1          | S |
| 1031 | CDKN2C | 7157   | TP53          | S |
| 1031 | CDKN2C | 9094   | UNC119        | S |
| 1031 | CDKN2C | 10589  | DRAP1         | S |
| 1031 | CDKN2C | 10980  | COPS6         | S |
| 1031 | CDKN2C | 55791  | C1orf103      | S |
| 1031 | CDKN2C | 60492  | MDS025        | S |
| 1031 | CDKN2C | 84060  | DKFZP564O0523 | S |
| 1032 | CDKN2D | 79735  | TBC1D17       | R |
| 1033 | CDKN3  | 1050   | CEBPA         | L |
| 1039 | CDR2   | 5585   | PKN1          | L |



|      |         |       |         |   |
|------|---------|-------|---------|---|
| 1045 | CDX2    | 1387  | CREBBP  | L |
| 1045 | CDX2    | 2033  | EP300   | L |
| 1045 | CDX2    | 5080  | PAX6    | L |
| 1045 | CDX2    | 6927  | TCF1    | L |
| 1047 | CLGN    | 2515  | ADAM2   | L |
| 1048 | CEACAM5 | 2130  | EWSR1   | R |
| 1048 | CEACAM5 | 4670  | HNRPM   | L |
| 1050 | CEBPA   | 1051  | CEBPB   | L |
| 1050 | CEBPA   | 1052  | CEBPD   | L |
| 1050 | CEBPA   | 1053  | CEBPE   | L |
| 1050 | CEBPA   | 1054  | CEBPG   | L |
| 1050 | CEBPA   | 1386  | ATF2    | L |
| 1050 | CEBPA   | 1499  | CTNNB1  | L |
| 1050 | CEBPA   | 1649  | DDIT3   | L |
| 1050 | CEBPA   | 2908  | NR3C1   | L |
| 1050 | CEBPA   | 4488  | MSX2    | L |
| 1050 | CEBPA   | 4609  | MYC     | L |
| 1050 | CEBPA   | 5981  | RFC1    | L |
| 1050 | CEBPA   | 6688  | SPI1    | L |
| 1050 | CEBPA   | 6927  | TCF1    | L |
| 1050 | CEBPA   | 9586  | CREB5   | L |
| 1050 | CEBPA   | 10538 | BATF    | L |
| 1050 | CEBPA   | 11016 | ATF7    | L |
| 1050 | CEBPA   | 22809 | ATF5    | L |
| 1050 | CEBPA   | 23054 | NCOA6   | L |
| 1050 | CEBPA   | 55509 | SNFT    | L |
| 1051 | CEBPB   | 1052  | CEBPD   | L |
| 1051 | CEBPB   | 1053  | CEBPE   | L |
| 1051 | CEBPB   | 1054  | CEBPG   | L |
| 1051 | CEBPB   | 1385  | CREB1   | L |
| 1051 | CEBPB   | 1386  | ATF2    | L |
| 1051 | CEBPB   | 1628  | DBP     | L |
| 1051 | CEBPB   | 1649  | DDIT3   | L |
| 1051 | CEBPB   | 1956  | EGFR    | L |
| 1051 | CEBPB   | 1958  | EGR1    | L |
| 1051 | CEBPB   | 2002  | ELK1    | L |
| 1051 | CEBPB   | 2033  | EP300   | L |
| 1051 | CEBPB   | 2099  | ESR1    | L |
| 1051 | CEBPB   | 2308  | FOXO1A  | L |
| 1051 | CEBPB   | 2908  | NR3C1   | L |
| 1051 | CEBPB   | 3159  | HMGA1   | L |
| 1051 | CEBPB   | 3190  | HNRPK   | L |
| 1051 | CEBPB   | 3297  | HSF1    | L |
| 1051 | CEBPB   | 4088  | SMAD3   | L |
| 1051 | CEBPB   | 4089  | SMAD4   | L |
| 1051 | CEBPB   | 4602  | MYB     | L |
| 1051 | CEBPB   | 4609  | MYC     | L |
| 1051 | CEBPB   | 4790  | NFKB1   | L |
| 1051 | CEBPB   | 5925  | RB1     | L |
| 1051 | CEBPB   | 5970  | RELA    | L |
| 1051 | CEBPB   | 6348  | CCL3    | L |
| 1051 | CEBPB   | 6597  | SMARCA4 | L |
| 1051 | CEBPB   | 6598  | SMARCB1 | L |
| 1051 | CEBPB   | 6599  | SMARCC1 | L |
| 1051 | CEBPB   | 6667  | SP1     | L |
| 1051 | CEBPB   | 6688  | SPI1    | L |
| 1051 | CEBPB   | 6722  | SRF     | L |
| 1051 | CEBPB   | 6776  | STAT5A  | L |
| 1051 | CEBPB   | 6778  | STAT6   | L |
| 1051 | CEBPB   | 9221  | NOLC1   | L |
| 1051 | CEBPB   | 9439  | CRSP3   | L |
| 1051 | CEBPB   | 9586  | CREB5   | L |
| 1051 | CEBPB   | 10155 | TRIM28  | L |
| 1051 | CEBPB   | 10538 | BATF    | L |
| 1051 | CEBPB   | 11016 | ATF7    | L |
| 1051 | CEBPB   | 22809 | ATF5    | L |
| 1051 | CEBPB   | 55509 | SNFT    | L |

|      |        |        |         |    |
|------|--------|--------|---------|----|
| 1052 | CEBPD  | 1053   | CEBPE   | L  |
| 1052 | CEBPD  | 1054   | CEBPG   | L  |
| 1052 | CEBPD  | 1649   | DDIT3   | L  |
| 1052 | CEBPD  | 5970   | RELA    | L  |
| 1052 | CEBPD  | 10538  | BATF    | L  |
| 1052 | CEBPD  | 22809  | ATF5    | L  |
| 1052 | CEBPD  | 55509  | SNFT    | L  |
| 1053 | CEBPE  | 1054   | CEBPG   | L  |
| 1053 | CEBPE  | 1649   | DDIT3   | L  |
| 1053 | CEBPE  | 3725   | JUN     | L  |
| 1053 | CEBPE  | 4602   | MYB     | L  |
| 1053 | CEBPE  | 9586   | CREB5   | L  |
| 1053 | CEBPE  | 10538  | BATF    | L  |
| 1053 | CEBPE  | 55509  | SNFT    | L  |
| 1054 | CEBPG  | 1386   | ATF2    | L  |
| 1054 | CEBPG  | 1628   | DBP     | L  |
| 1054 | CEBPG  | 1649   | DDIT3   | RL |
| 1054 | CEBPG  | 2353   | FOS     | L  |
| 1054 | CEBPG  | 2355   | FOSL2   | L  |
| 1054 | CEBPG  | 3131   | HLF     | L  |
| 1054 | CEBPG  | 4302   | MLLT6   | R  |
| 1054 | CEBPG  | 4783   | NFIL3   | L  |
| 1054 | CEBPG  | 7008   | TEF     | L  |
| 1054 | CEBPG  | 7975   | MAFK    | L  |
| 1054 | CEBPG  | 8061   | FOSL1   | L  |
| 1054 | CEBPG  | 9586   | CREB5   | L  |
| 1054 | CEBPG  | 10488  | CREB3   | L  |
| 1054 | CEBPG  | 10538  | BATF    | L  |
| 1054 | CEBPG  | 11016  | ATF7    | L  |
| 1054 | CEBPG  | 22809  | ATF5    | L  |
| 1054 | CEBPG  | 55509  | SNFT    | L  |
| 1054 | CEBPG  | 81488  | GRINL1A | R  |
| 1054 | CEBPG  | 84699  | CREB3L3 | L  |
| 1054 | CEBPG  | 90993  | CREB3L1 | L  |
| 1054 | CEBPG  | 148327 | CREB3L4 | L  |
| 1058 | CENPA  | 1729   | DIAPH1  | L  |
| 1058 | CENPA  | 1730   | DIAPH2  | L  |
| 1058 | CENPA  | 10038  | PARP2   | L  |
| 1059 | CENPB  | 9464   | HAND2   | L  |
| 1059 | CENPB  | 10038  | PARP2   | L  |
| 1060 | CENPC1 | 1616   | DAXX    | L  |
| 1060 | CENPC1 | 7343   | UBTF    | L  |
| 1062 | CENPE  | 1063   | CENPF   | L  |
| 1063 | CENPF  | 8315   | BRAP    | L  |
| 1063 | CENPF  | 8940   | TOP3B   | L  |
| 1066 | CES1   | 2990   | GUSB    | L  |
| 1069 | CETN2  | 5887   | RAD23B  | L  |
| 1069 | CETN2  | 7508   | XPC     | L  |
| 1069 | CETN2  | 9814   | SFI1    | L  |
| 1070 | CETN3  | 9094   | UNC119  | S  |
| 1071 | CETP   | 2130   | EWSR1   | R  |
| 1071 | CETP   | 4023   | LPL     | L  |
| 1071 | CETP   | 10094  | ARPC3   | S  |
| 1072 | CFL1   | 3984   | LIMK1   | L  |
| 1072 | CFL1   | 7167   | TPI1    | L  |
| 1072 | CFL1   | 10487  | CAP1    | L  |
| 1072 | CFL1   | 10808  | HSPH1   | L  |
| 1072 | CFL1   | 26292  | MYCBP   | S  |
| 1072 | CFL1   | 54434  | SSH1    | L  |
| 1072 | CFL1   | 54961  | SSH3    | L  |
| 1072 | CFL1   | 85464  | SSH2    | L  |
| 1080 | CFTR   | 3301   | DNAJA1  | L  |
| 1080 | CFTR   | 5174   | PDZK1   | L  |
| 1080 | CFTR   | 5562   | PRKAA1  | L  |
| 1080 | CFTR   | 5576   | PRKAR2A | L  |
| 1080 | CFTR   | 5581   | PRKCE   | L  |
| 1080 | CFTR   | 6804   | STX1A   | L  |

|      |         |       |           |   |
|------|---------|-------|-----------|---|
| 1080 | CFTR    | 7430  | VIL2      | L |
| 1080 | CFTR    | 8773  | SNAP23    | L |
| 1080 | CFTR    | 9351  | SLC9A3R2  | L |
| 1080 | CFTR    | 9368  | SLC9A3R1  | L |
| 1080 | CFTR    | 9497  | SLC4A7    | L |
| 1080 | CFTR    | 9498  | SLC4A8    | L |
| 1080 | CFTR    | 57120 | GOPC      | L |
| 1080 | CFTR    | 80331 | DNAJC5    | L |
| 1081 | CGA     | 1082  | CGB       | L |
| 1081 | CGA     | 2488  | FSHB      | L |
| 1081 | CGA     | 3972  | LHB       | L |
| 1081 | CGA     | 3973  | LHCGR     | L |
| 1081 | CGA     | 5764  | PTN       | S |
| 1081 | CGA     | 5782  | PTPN12    | L |
| 1081 | CGA     | 7252  | TSHB      | L |
| 1081 | CGA     | 93659 | CGB5      | L |
| 1081 | CGA     | 94027 | CGB7      | L |
| 1082 | CGB     | 2488  | FSHB      | L |
| 1082 | CGB     | 3973  | LHCGR     | L |
| 1088 | CEACAM8 | 4680  | CEACAM6   | L |
| 1101 | CHAD    | 1280  | COL2A1    | L |
| 1102 | RCBTB2  | 51138 | COPS4     | R |
| 1104 | RCC1    | 1119  | CHKA      | L |
| 1104 | RCC1    | 1452  | CSNK1A1   | L |
| 1104 | RCC1    | 3839  | KPNA3     | L |
| 1104 | RCC1    | 5757  | PTMA      | L |
| 1104 | RCC1    | 5901  | RAN       | L |
| 1104 | RCC1    | 5902  | RANBP1    | L |
| 1104 | RCC1    | 7514  | XPO1      | L |
| 1104 | RCC1    | 8337  | HIST2H2AA | L |
| 1104 | RCC1    | 8349  | HIST2H2BE | L |
| 1104 | RCC1    | 8498  | RANBP3    | L |
| 1105 | CHD1    | 3065  | HDAC1     | L |
| 1105 | CHD1    | 6294  | SAFB      | L |
| 1105 | CHD1    | 6428  | SFRS3     | L |
| 1105 | CHD1    | 6749  | SSRP1     | L |
| 1105 | CHD1    | 9611  | NCOR1     | L |
| 1107 | CHD3    | 1363  | CPE       | S |
| 1107 | CHD3    | 1385  | CREB1     | S |
| 1107 | CHD3    | 1478  | CSTF2     | S |
| 1107 | CHD3    | 2017  | CTTN      | S |
| 1107 | CHD3    | 2874  | GPS2      | S |
| 1107 | CHD3    | 3065  | HDAC1     | L |
| 1107 | CHD3    | 3066  | HDAC2     | L |
| 1107 | CHD3    | 3550  | IK        | S |
| 1107 | CHD3    | 4097  | MAFG      | S |
| 1107 | CHD3    | 4122  | MAN2A2    | S |
| 1107 | CHD3    | 5110  | PCMT1     | S |
| 1107 | CHD3    | 5553  | PRG2      | S |
| 1107 | CHD3    | 5720  | PSME1     | S |
| 1107 | CHD3    | 5764  | PTN       | S |
| 1107 | CHD3    | 5802  | PTPRS     | S |
| 1107 | CHD3    | 5888  | RAD51     | S |
| 1107 | CHD3    | 6159  | RPL29     | S |
| 1107 | CHD3    | 6294  | SAFB      | S |
| 1107 | CHD3    | 6303  | SAT       | S |
| 1107 | CHD3    | 6304  | SATB1     | L |
| 1107 | CHD3    | 6613  | SUMO2     | S |
| 1107 | CHD3    | 7105  | TSPAN6    | S |
| 1107 | CHD3    | 7157  | TP53      | L |
| 1107 | CHD3    | 7161  | TP73      | L |
| 1107 | CHD3    | 7276  | TTR       | S |
| 1107 | CHD3    | 7329  | UBE2I     | L |
| 1107 | CHD3    | 7341  | SUMO1     | L |
| 1107 | CHD3    | 7518  | XRCC4     | S |
| 1107 | CHD3    | 8553  | BHLHB2    | S |
| 1107 | CHD3    | 8764  | TNFRSF14  | S |

|      |       |        |               |    |
|------|-------|--------|---------------|----|
| 1107 | CHD3  | 8789   | FBP2          | S  |
| 1107 | CHD3  | 8880   | FUBP1         | S  |
| 1107 | CHD3  | 9039   | UBE1C         | S  |
| 1107 | CHD3  | 9905   | RUTBC1        | S  |
| 1107 | CHD3  | 10120  | ACTR1B        | S  |
| 1107 | CHD3  | 10155  | TRIM28        | S  |
| 1107 | CHD3  | 10169  | SERF2         | S  |
| 1107 | CHD3  | 10190  | TXNDC9        | S  |
| 1107 | CHD3  | 10320  | ZNFN1A1       | L  |
| 1107 | CHD3  | 10606  | PAICS         | S  |
| 1107 | CHD3  | 10625  | IVNS1ABP      | S  |
| 1107 | CHD3  | 10807  | SDCCAG3       | S  |
| 1107 | CHD3  | 10808  | HSPH1         | S  |
| 1107 | CHD3  | 10989  | IMMT          | S  |
| 1107 | CHD3  | 22827  | SIAHBP1       | S  |
| 1107 | CHD3  | 22927  | HABP4         | S  |
| 1107 | CHD3  | 26135  | SERBP1        | SL |
| 1107 | CHD3  | 28965  | SLC27A6       | S  |
| 1107 | CHD3  | 51548  | SIRT6         | S  |
| 1107 | CHD3  | 51593  | ARS2          | S  |
| 1107 | CHD3  | 51631  | LUC7L2        | S  |
| 1107 | CHD3  | 54544  | C1orf42       | S  |
| 1107 | CHD3  | 56992  | KIF15         | S  |
| 1107 | CHD3  | 57002  | C7orf36       | S  |
| 1107 | CHD3  | 79137  | C2orf17       | S  |
| 1107 | CHD3  | 80145  | NIF3L1BP1     | S  |
| 1107 | CHD3  | 84103  | C4orf17       | S  |
| 1107 | CHD3  | 84213  | (null)        | S  |
| 1107 | CHD3  | 93974  | ATPIF1        | S  |
| 1108 | CHD4  | 54464  | XRN1          | L  |
| 1108 | CHD4  | 64375  | ZNFN1A4       | L  |
| 1111 | CHEK1 | 2547   | XRCC6         | L  |
| 1111 | CHEK1 | 7157   | TP53          | L  |
| 1111 | CHEK1 | 63967  | CLSPN         | L  |
| 1112 | CHES1 | 11340  | EXOSC8        | L  |
| 1113 | CHGA  | 5340   | PLG           | L  |
| 1113 | CHGA  | 29106  | SCG3          | L  |
| 1114 | CHGB  | 2261   | FGFR3         | S  |
| 1114 | CHGB  | 4140   | MARK3         | S  |
| 1114 | CHGB  | 4968   | OGG1          | S  |
| 1114 | CHGB  | 5424   | POLD1         | S  |
| 1114 | CHGB  | 5434   | POLR2E        | S  |
| 1114 | CHGB  | 5728   | PTEN          | S  |
| 1114 | CHGB  | 6258   | RXRG          | S  |
| 1114 | CHGB  | 6279   | S100A8        | S  |
| 1114 | CHGB  | 6311   | ATXN2         | S  |
| 1114 | CHGB  | 6901   | TAZ           | S  |
| 1114 | CHGB  | 7280   | TUBB2         | S  |
| 1114 | CHGB  | 7343   | UBTF          | S  |
| 1114 | CHGB  | 7841   | GCS1          | S  |
| 1114 | CHGB  | 9667   | SAFB2         | S  |
| 1114 | CHGB  | 11343  | MGLL          | S  |
| 1114 | CHGB  | 11344  | PTK9L         | S  |
| 1114 | CHGB  | 56252  | YLPM1         | S  |
| 1114 | CHGB  | 80126  | FLJ23185      | S  |
| 1114 | CHGB  | 80212  | FLJ22471      | S  |
| 1114 | CHGB  | 157285 | DKFZp761P0423 | S  |
| 1121 | CHM   | 5864   | RAB3A         | L  |
| 1121 | CHM   | 9545   | RAB3D         | L  |
| 1121 | CHM   | 81876  | RAB1B         | L  |
| 1122 | CHML  | 5861   | RAB1A         | L  |
| 1122 | CHML  | 5864   | RAB3A         | L  |
| 1122 | CHML  | 5868   | RAB5A         | L  |
| 1122 | CHML  | 5870   | RAB6A         | L  |
| 1123 | CHN1  | 2975   | GTF3C1        | S  |
| 1123 | CHN1  | 6189   | RPS3A         | S  |
| 1124 | CHN2  | 4690   | NCK1          | L  |

|      |        |        |          |   |
|------|--------|--------|----------|---|
| 1124 | CHN2   | 7917   | BAT3     | S |
| 1124 | CHN2   | 222019 | (null)   | S |
| 1128 | CHRM1  | 2771   | GNAI2    | L |
| 1129 | CHRM2  | 2767   | GNA11    | L |
| 1129 | CHRM2  | 2769   | GNA15    | L |
| 1129 | CHRM2  | 2869   | GRK5     | L |
| 1129 | CHRM2  | 6295   | SAG      | L |
| 1129 | CHRM2  | 9630   | GNA14    | L |
| 1130 | LYST   | 1460   | CSNK2B   | L |
| 1130 | LYST   | 1822   | ATN1     | L |
| 1130 | LYST   | 2101   | ESRRA    | L |
| 1130 | LYST   | 3837   | KPNB1    | L |
| 1130 | LYST   | 4670   | HNRPM    | L |
| 1130 | LYST   | 7529   | YWHAB    | L |
| 1130 | LYST   | 8220   | DGCR14   | L |
| 1130 | LYST   | 9146   | HGS      | L |
| 1130 | LYST   | 9968   | MED12    | L |
| 1130 | LYST   | 10971  | YWHAQ    | L |
| 1130 | LYST   | 23154  | NCDN     | L |
| 1130 | LYST   | 63875  | MRPL17   | L |
| 1131 | CHRM3  | 1452   | CSNK1A1  | L |
| 1131 | CHRM3  | 2776   | GNAQ     | L |
| 1131 | CHRM3  | 2870   | GRK6     | L |
| 1131 | CHRM3  | 3002   | GZMB     | L |
| 1134 | CHRNA1 | 1144   | CHRND    | L |
| 1134 | CHRNA1 | 1145   | CHRNE    | L |
| 1134 | CHRNA1 | 1146   | CHRNA1   | L |
| 1134 | CHRNA1 | 3679   | ITGA7    | L |
| 1135 | CHRNA2 | 1141   | CHRNA2   | L |
| 1135 | CHRNA2 | 1143   | CHRNA2   | L |
| 1136 | CHRNA3 | 1143   | CHRNA3   | L |
| 1137 | CHRNA4 | 1143   | CHRNA4   | L |
| 1137 | CHRNA4 | 7447   | VSNL1    | L |
| 1137 | CHRNA4 | 7533   | YWHAH    | L |
| 1138 | CHRNA5 | 1143   | CHRNA5   | L |
| 1139 | CHRNA7 | 5295   | PIK3R1   | L |
| 1140 | CHRNA1 | 10980  | COPS6    | S |
| 1144 | CHRND  | 2885   | GRB2     | L |
| 1147 | CHUK   | 1326   | MAP3K8   | L |
| 1147 | CHUK   | 1499   | CTNNB1   | L |
| 1147 | CHUK   | 2309   | FOXO3A   | L |
| 1147 | CHUK   | 3320   | HSPCA    | L |
| 1147 | CHUK   | 3667   | IRS1     | L |
| 1147 | CHUK   | 4296   | MAP3K11  | L |
| 1147 | CHUK   | 4790   | NFKB1    | L |
| 1147 | CHUK   | 4793   | NFKBIB   | L |
| 1147 | CHUK   | 5591   | PRKDC    | L |
| 1147 | CHUK   | 6885   | MAP3K7   | L |
| 1147 | CHUK   | 7128   | TNFAIP3  | L |
| 1147 | CHUK   | 7132   | TNFRSF1A | L |
| 1147 | CHUK   | 7157   | TP53     | L |
| 1147 | CHUK   | 7186   | TRAF2    | L |
| 1147 | CHUK   | 8518   | IKBKAP   | L |
| 1147 | CHUK   | 8915   | BCL10    | L |
| 1147 | CHUK   | 9020   | MAP3K14  | L |
| 1147 | CHUK   | 10477  | UBE2E3   | L |
| 1147 | CHUK   | 10758  | TRAF3IP2 | L |
| 1147 | CHUK   | 11140  | CDC37    | L |
| 1147 | CHUK   | 26133  | TRPC4AP  | L |
| 1147 | CHUK   | 147945 | NALP4    | L |
| 1149 | CIDEA  | 7704   | ZBTB16   | S |
| 1152 | CKB    | 1158   | CKM      | L |
| 1152 | CKB    | 140462 | ASB9     | R |
| 1152 | CKB    | 387923 | C13orf21 | R |
| 1153 | CIRBP  | 3276   | HRMT1L2  | L |
| 1153 | CIRBP  | 7094   | TLN1     | L |
| 1153 | CIRBP  | 7414   | VCL      | L |

|      |        |        |           |   |
|------|--------|--------|-----------|---|
| 1153 | CIRBP  | 27316  | RBMX      | R |
| 1154 | CISH   | 2057   | EPOR      | L |
| 1154 | CISH   | 3560   | IL2RB     | L |
| 1154 | CISH   | 3563   | IL3RA     | L |
| 1154 | CISH   | 4087   | SMAD2     | L |
| 1154 | CISH   | 5618   | PRLR      | L |
| 1154 | CISH   | 8649   | MAP2K1IP1 | L |
| 1155 | CKAP1  | 7277   | TUBA1     | L |
| 1159 | CKMT1B | 7416   | VDAC1     | L |
| 1160 | CKMT2  | 9094   | UNC119    | S |
| 1160 | CKMT2  | 55791  | C1orf103  | S |
| 1160 | CKMT2  | 56944  | OLFML3    | S |
| 1161 | ERCC8  | 27089  | QP-C      | S |
| 1163 | CKS1B  | 6502   | SKP2      | L |
| 1164 | CKS2   | 1915   | EEF1A1    | S |
| 1164 | CKS2   | 9094   | UNC119    | S |
| 1164 | CKS2   | 81628  | TSC22D4   | R |
| 1173 | AP2M1  | 1493   | CTLA4     | L |
| 1173 | AP2M1  | 1601   | DAB2      | L |
| 1173 | AP2M1  | 1856   | DVL2      | R |
| 1173 | AP2M1  | 2580   | GAK       | L |
| 1173 | AP2M1  | 3916   | LAMP1     | L |
| 1173 | AP2M1  | 4063   | LY9       | L |
| 1173 | AP2M1  | 5045   | FURIN     | L |
| 1173 | AP2M1  | 9513   | FXR2      | R |
| 1173 | AP2M1  | 9779   | TBC1D5    | R |
| 1173 | AP2M1  | 10320  | ZNFN1A1   | R |
| 1173 | AP2M1  | 10900  | RPIP8     | R |
| 1173 | AP2M1  | 10928  | RALBP1    | L |
| 1173 | AP2M1  | 27156  | RTDR1     | R |
| 1173 | AP2M1  | 29079  | MED4      | R |
| 1173 | AP2M1  | 30846  | EHD2      | L |
| 1173 | AP2M1  | 127557 | ZBTB8     | R |
| 1173 | AP2M1  | 151871 | DPPA2     | R |
| 1174 | AP1S1  | 8906   | AP1G2     | L |
| 1174 | AP1S1  | 10053  | AP1M2     | L |
| 1174 | AP1S1  | 23431  | AP4E1     | L |
| 1176 | AP3S1  | 3667   | IRS1      | L |
| 1176 | AP3S1  | 8120   | AP3B2     | L |
| 1176 | AP3S1  | 10239  | AP3S2     | L |
| 1179 | CLCA1  | 3779   | KCNMB1    | L |
| 1182 | CLCN3  | 5174   | PDZK1     | L |
| 1182 | CLCN3  | 9368   | SLC9A3R1  | L |
| 1182 | CLCN3  | 57120  | GOPC      | L |
| 1191 | CLU    | 2547   | XRCC6     | L |
| 1191 | CLU    | 3952   | LEP       | L |
| 1191 | CLU    | 3953   | LEPR      | L |
| 1191 | CLU    | 4036   | LRP2      | L |
| 1191 | CLU    | 5444   | PON1      | L |
| 1191 | CLU    | 7046   | TGFBR1    | L |
| 1191 | CLU    | 7048   | TGFBR2    | L |
| 1191 | CLU    | 7436   | VLDLR     | L |
| 1191 | CLU    | 7804   | LRP8      | L |
| 1191 | CLU    | 64386  | MMP25     | L |
| 1192 | CLIC1  | 6399   | TRAPPC2   | L |
| 1192 | CLIC1  | 10142  | AKAP9     | L |
| 1192 | CLIC1  | 27257  | LSM1      | L |
| 1192 | CLIC1  | 286262 | C9orf75   | L |
| 1193 | CLIC2  | 6399   | TRAPPC2   | L |
| 1195 | CLK1   | 4155   | MBP       | L |
| 1195 | CLK1   | 6426   | SFRS1     | L |
| 1195 | CLK1   | 6431   | SFRS6     | L |
| 1195 | CLK1   | 9128   | PRPF4     | L |
| 1195 | CLK1   | 9360   | PPIG      | L |
| 1195 | CLK1   | 51280  | GOLPH2    | S |
| 1195 | CLK1   | 59286  | UBL5      | L |
| 1196 | CLK2   | 1198   | CLK3      | R |

|      |        |       |          |   |
|------|--------|-------|----------|---|
| 1198 | CLK3   | 57035 | C1orf63  | R |
| 1207 | CLNS1A | 2035  | EPB41    | L |
| 1207 | CLNS1A | 13682 | (null)   | S |
| 1208 | CLPS   | 5406  | PNLIP    | L |
| 1208 | CLPS   | 8513  | LIPF     | L |
| 1211 | CLTA   | 1213  | CLTC     | L |
| 1211 | CLTA   | 3092  | HIP1     | L |
| 1211 | CLTA   | 3312  | HSPA8    | L |
| 1211 | CLTA   | 9026  | HIP1R    | L |
| 1212 | CLTB   | 1213  | CLTC     | L |
| 1212 | CLTB   | 3092  | HIP1     | L |
| 1212 | CLTB   | 9026  | HIP1R    | L |
| 1212 | CLTB   | 10084 | PQBP1    | S |
| 1213 | CLTC   | 2580  | GAK      | L |
| 1213 | CLTC   | 3092  | HIP1     | L |
| 1213 | CLTC   | 3815  | KIT      | L |
| 1213 | CLTC   | 4294  | MAP3K10  | L |
| 1213 | CLTC   | 7414  | VCL      | L |
| 1213 | CLTC   | 8120  | AP3B2    | L |
| 1213 | CLTC   | 8546  | AP3B1    | L |
| 1213 | CLTC   | 9026  | HIP1R    | L |
| 1213 | CLTC   | 9146  | HGS      | L |
| 1213 | CLTC   | 9685  | ENTH     | L |
| 1213 | CLTC   | 10043 | TOM1     | L |
| 1213 | CLTC   | 26119 | LDLRAP1  | L |
| 1213 | CLTC   | 29924 | EPN1     | L |
| 1213 | CLTC   | 51566 | ARMCX3   | S |
| 1213 | CLTC   | 80007 | C10orf88 | S |
| 1213 | CLTC   | 83988 | NCALD    | L |
| 1230 | CCR1   | 6348  | CCL3     | L |
| 1230 | CCR1   | 6349  | CCL3L1   | L |
| 1230 | CCR1   | 6352  | CCL5     | L |
| 1230 | CCR1   | 6354  | CCL7     | L |
| 1230 | CCR1   | 6355  | CCL8     | L |
| 1230 | CCR1   | 6358  | CCL14    | L |
| 1230 | CCR1   | 6359  | CCL15    | L |
| 1230 | CCR1   | 6360  | CCL16    | L |
| 1230 | CCR1   | 6368  | CCL23    | L |
| 1230 | CCR1   | 9630  | GNA14    | L |
| 1231 | CCR2   | 1234  | CCR5     | L |
| 1231 | CCR2   | 3717  | JAK2     | L |
| 1231 | CCR2   | 6347  | CCL2     | L |
| 1231 | CCR2   | 6354  | CCL7     | L |
| 1231 | CCR2   | 6355  | CCL8     | L |
| 1231 | CCR2   | 6356  | CCL11    | L |
| 1231 | CCR2   | 6357  | CCL13    | L |
| 1231 | CCR2   | 6360  | CCL16    | L |
| 1232 | CCR3   | 2268  | FGR      | L |
| 1232 | CCR3   | 3055  | HCK      | L |
| 1232 | CCR3   | 6349  | CCL3L1   | L |
| 1232 | CCR3   | 6352  | CCL5     | L |
| 1232 | CCR3   | 6354  | CCL7     | L |
| 1232 | CCR3   | 6355  | CCL8     | L |
| 1232 | CCR3   | 6356  | CCL11    | L |
| 1232 | CCR3   | 6357  | CCL13    | L |
| 1232 | CCR3   | 6358  | CCL14    | L |
| 1232 | CCR3   | 6359  | CCL15    | L |
| 1232 | CCR3   | 6369  | CCL24    | L |
| 1232 | CCR3   | 10344 | CCL26    | L |
| 1232 | CCR3   | 56477 | CCL28    | L |
| 1233 | CCR4   | 6348  | CCL3     | L |
| 1233 | CCR4   | 6352  | CCL5     | L |
| 1233 | CCR4   | 6361  | CCL17    | L |
| 1233 | CCR4   | 6367  | CCL22    | L |
| 1234 | CCR5   | 2185  | PTK2B    | L |
| 1234 | CCR5   | 3717  | JAK2     | L |
| 1234 | CCR5   | 3932  | LCK      | L |

|      |       |       |          |   |
|------|-------|-------|----------|---|
| 1234 | CCR5  | 5747  | PTK2     | L |
| 1234 | CCR5  | 6347  | CCL2     | L |
| 1234 | CCR5  | 6348  | CCL3     | L |
| 1234 | CCR5  | 6349  | CCL3L1   | L |
| 1234 | CCR5  | 6351  | CCL4     | L |
| 1234 | CCR5  | 6352  | CCL5     | L |
| 1234 | CCR5  | 6354  | CCL7     | L |
| 1234 | CCR5  | 6355  | CCL8     | L |
| 1234 | CCR5  | 6356  | CCL11    | L |
| 1234 | CCR5  | 6357  | CCL13    | L |
| 1234 | CCR5  | 6358  | CCL14    | L |
| 1234 | CCR5  | 6360  | CCL16    | L |
| 1234 | CCR5  | 7294  | TXK      | L |
| 1234 | CCR5  | 7852  | CXCR4    | L |
| 1235 | CCR6  | 1673  | DEFB4    | L |
| 1235 | CCR6  | 6364  | CCL20    | L |
| 1235 | CCR6  | 55894 | DEFB103A | L |
| 1236 | CCR7  | 6363  | CCL19    | L |
| 1236 | CCR7  | 6366  | CCL21    | L |
| 1237 | CCR8  | 6346  | CCL1     | L |
| 1237 | CCR8  | 6351  | CCL4     | L |
| 1237 | CCR8  | 6360  | CCL16    | L |
| 1237 | CCR8  | 6361  | CCL17    | L |
| 1238 | CCBP2 | 6347  | CCL2     | L |
| 1238 | CCBP2 | 6348  | CCL3     | L |
| 1238 | CCBP2 | 6351  | CCL4     | L |
| 1238 | CCBP2 | 6352  | CCL5     | L |
| 1238 | CCBP2 | 6354  | CCL7     | L |
| 1238 | CCBP2 | 6355  | CCL8     | L |
| 1238 | CCBP2 | 6356  | CCL11    | L |
| 1238 | CCBP2 | 6357  | CCL13    | L |
| 1238 | CCBP2 | 6358  | CCL14    | L |
| 1238 | CCBP2 | 6363  | CCL19    | L |
| 1238 | CCBP2 | 6366  | CCL21    | L |
| 1238 | CCBP2 | 6370  | CCL25    | L |
| 1238 | CCBP2 | 10850 | CCL27    | L |
| 1238 | CCBP2 | 56477 | CCL28    | L |
| 1241 | LTB4R | 2769  | GNA15    | L |
| 1244 | ABCC2 | 5174  | PDZK1    | L |
| 1244 | ABCC2 | 5962  | RDX      | L |
| 1244 | ABCC2 | 9368  | SLC9A3R1 | L |
| 1258 | CNGB1 | 5961  | RDS      | L |
| 1259 | CNGA1 | 9187  | SLC24A1  | L |
| 1260 | CNGA2 | 9368  | SLC9A3R1 | L |
| 1263 | PLK3  | 7157  | TP53     | L |
| 1263 | PLK3  | 9319  | TRIP13   | R |
| 1263 | PLK3  | 10519 | CIB1     | L |
| 1263 | PLK3  | 11200 | CHEK2    | L |
| 1264 | CNN1  | 5581  | PRKCE    | L |
| 1264 | CNN1  | 7170  | TPM3     | L |
| 1267 | CNP   | 7846  | TUBA3    | L |
| 1268 | CNR1  | 2769  | GNA15    | L |
| 1268 | CNR1  | 2770  | GNAI1    | L |
| 1268 | CNR1  | 2771  | GNAI2    | L |
| 1268 | CNR1  | 2773  | GNAI3    | L |
| 1268 | CNR1  | 3061  | HCRTR1   | L |
| 1269 | CNR2  | 2769  | GNA15    | L |
| 1270 | CNTF  | 1271  | CNTFR    | L |
| 1270 | CNTF  | 3570  | IL6R     | L |
| 1270 | CNTF  | 3572  | IL6ST    | L |
| 1270 | CNTF  | 3977  | LIFR     | L |
| 1271 | CNTFR | 3572  | IL6ST    | L |
| 1271 | CNTFR | 3977  | LIFR     | L |
| 1271 | CNTFR | 5359  | PLSCR1   | R |
| 1271 | CNTFR | 9244  | CRLF1    | L |
| 1271 | CNTFR | 10513 | APPBP2   | R |
| 1271 | CNTFR | 23529 | CLCF1    | L |



|      |        |        |           |   |
|------|--------|--------|-----------|---|
| 1271 | CNTFR  | 83755  | KRTAP4-12 | R |
| 1272 | CNTN1  | 2534   | FYN       | L |
| 1272 | CNTN1  | 3371   | TNC       | L |
| 1272 | CNTN1  | 3897   | L1CAM     | L |
| 1272 | CNTN1  | 4851   | NOTCH1    | L |
| 1272 | CNTN1  | 4853   | NOTCH2    | L |
| 1272 | CNTN1  | 5787   | PTPRB     | L |
| 1272 | CNTN1  | 6338   | SCNN1B    | L |
| 1272 | CNTN1  | 6900   | CNTN2     | L |
| 1272 | CNTN1  | 7143   | TNR       | L |
| 1277 | COL1A1 | 1294   | COL7A1    | L |
| 1277 | COL1A1 | 1634   | DCN       | L |
| 1277 | COL1A1 | 2252   | FGF7      | L |
| 1277 | COL1A1 | 2335   | FN1       | L |
| 1277 | COL1A1 | 3486   | IGFBP3    | L |
| 1277 | COL1A1 | 3673   | ITGA2     | L |
| 1277 | COL1A1 | 3678   | ITGA5     | L |
| 1277 | COL1A1 | 4147   | MATN2     | L |
| 1277 | COL1A1 | 4313   | MMP2      | L |
| 1277 | COL1A1 | 4318   | MMP9      | L |
| 1277 | COL1A1 | 4811   | NID1      | L |
| 1277 | COL1A1 | 4921   | DDR2      | L |
| 1277 | COL1A1 | 5034   | P4HB      | L |
| 1277 | COL1A1 | 5058   | PAK1      | L |
| 1277 | COL1A1 | 5155   | PDGFB     | L |
| 1277 | COL1A1 | 5549   | PRELP     | L |
| 1277 | COL1A1 | 5829   | PXN       | L |
| 1277 | COL1A1 | 6678   | SPARC     | L |
| 1277 | COL1A1 | 7045   | TGFBI     | L |
| 1277 | COL1A1 | 7057   | THBS1     | L |
| 1277 | COL1A1 | 7295   | TXN       | L |
| 1277 | COL1A1 | 7450   | VWF       | L |
| 1277 | COL1A1 | 22918  | C1QR1     | L |
| 1277 | COL1A1 | 164656 | TMPRSS6   | L |
| 1278 | COL1A2 | 1634   | DCN       | L |
| 1278 | COL1A2 | 2335   | FN1       | L |
| 1278 | COL1A2 | 3673   | ITGA2     | L |
| 1278 | COL1A2 | 3674   | ITGA2B    | L |
| 1278 | COL1A2 | 4060   | LUM       | L |
| 1278 | COL1A2 | 4318   | MMP9      | L |
| 1278 | COL1A2 | 5034   | P4HB      | L |
| 1278 | COL1A2 | 5829   | PXN       | L |
| 1278 | COL1A2 | 6678   | SPARC     | L |
| 1278 | COL1A2 | 7045   | TGFBI     | L |
| 1278 | COL1A2 | 7450   | VWF       | L |
| 1278 | COL1A2 | 22918  | C1QR1     | L |
| 1278 | COL1A2 | 50509  | COL5A3    | L |
| 1280 | COL2A1 | 1291   | COL6A1    | L |
| 1280 | COL2A1 | 1298   | COL9A2    | L |
| 1280 | COL2A1 | 1299   | COL9A3    | L |
| 1280 | COL2A1 | 1311   | COMP      | L |
| 1280 | COL2A1 | 1634   | DCN       | L |
| 1280 | COL2A1 | 2252   | FGF7      | L |
| 1280 | COL2A1 | 2335   | FN1       | L |
| 1280 | COL2A1 | 3674   | ITGA2B    | L |
| 1280 | COL2A1 | 4099   | MAG       | L |
| 1280 | COL2A1 | 4146   | MATN1     | L |
| 1280 | COL2A1 | 5310   | PKD1      | L |
| 1280 | COL2A1 | 5549   | PRELP     | L |
| 1280 | COL2A1 | 6678   | SPARC     | L |
| 1280 | COL2A1 | 7040   | TGFB1     | L |
| 1280 | COL2A1 | 7045   | TGFBI     | L |
| 1280 | COL2A1 | 7057   | THBS1     | L |
| 1280 | COL2A1 | 8797   | TNFRSF10A | L |
| 1280 | COL2A1 | 84171  | LOXL4     | L |
| 1281 | COL3A1 | 2252   | FGF7      | L |
| 1281 | COL3A1 | 4099   | MAG       | L |

|      |        |        |          |   |
|------|--------|--------|----------|---|
| 1281 | COL3A1 | 4921   | DDR2     | L |
| 1281 | COL3A1 | 6678   | SPARC    | L |
| 1281 | COL3A1 | 7057   | THBS1    | L |
| 1282 | COL4A1 | 1284   | COL4A2   | L |
| 1282 | COL4A1 | 1294   | COL7A1   | L |
| 1282 | COL4A1 | 1634   | DCN      | L |
| 1282 | COL4A1 | 2199   | FBLN2    | L |
| 1282 | COL4A1 | 3026   | HABP2    | L |
| 1282 | COL4A1 | 4147   | MATN2    | L |
| 1282 | COL4A1 | 4318   | MMP9     | L |
| 1282 | COL4A1 | 5008   | OSM      | L |
| 1282 | COL4A1 | 5270   | SERPINE2 | L |
| 1282 | COL4A1 | 5829   | PXN      | L |
| 1282 | COL4A1 | 6288   | SAA1     | L |
| 1282 | COL4A1 | 7045   | TGFBI    | L |
| 1282 | COL4A1 | 22918  | C1QR1    | L |
| 1284 | COL4A2 | 1634   | DCN      | L |
| 1284 | COL4A2 | 2199   | FBLN2    | L |
| 1284 | COL4A2 | 3026   | HABP2    | L |
| 1284 | COL4A2 | 4147   | MATN2    | L |
| 1284 | COL4A2 | 4318   | MMP9     | L |
| 1284 | COL4A2 | 5008   | OSM      | L |
| 1284 | COL4A2 | 5270   | SERPINE2 | L |
| 1284 | COL4A2 | 6288   | SAA1     | L |
| 1284 | COL4A2 | 6498   | SKIL     | L |
| 1284 | COL4A2 | 7045   | TGFBI    | L |
| 1284 | COL4A2 | 22918  | C1QR1    | L |
| 1284 | COL4A2 | 55603  | FAM46A   | L |
| 1284 | COL4A2 | 55729  | ATF7IP   | L |
| 1284 | COL4A2 | 118429 | ANTXR2   | L |
| 1285 | COL4A3 | 1634   | DCN      | L |
| 1285 | COL4A3 | 2199   | FBLN2    | L |
| 1285 | COL4A3 | 2335   | FN1      | L |
| 1285 | COL4A3 | 3026   | HABP2    | L |
| 1285 | COL4A3 | 4147   | MATN2    | L |
| 1285 | COL4A3 | 4237   | MFAP2    | L |
| 1285 | COL4A3 | 4318   | MMP9     | L |
| 1285 | COL4A3 | 5008   | OSM      | L |
| 1285 | COL4A3 | 5270   | SERPINE2 | L |
| 1285 | COL4A3 | 6288   | SAA1     | L |
| 1285 | COL4A3 | 7045   | TGFBI    | L |
| 1285 | COL4A3 | 7399   | USH2A    | L |
| 1285 | COL4A3 | 10087  | COL4A3BP | L |
| 1285 | COL4A3 | 22918  | C1QR1    | L |
| 1285 | COL4A3 | 118429 | ANTXR2   | L |
| 1286 | COL4A4 | 1634   | DCN      | L |
| 1286 | COL4A4 | 2199   | FBLN2    | L |
| 1286 | COL4A4 | 2335   | FN1      | L |
| 1286 | COL4A4 | 3026   | HABP2    | L |
| 1286 | COL4A4 | 4147   | MATN2    | L |
| 1286 | COL4A4 | 4318   | MMP9     | L |
| 1286 | COL4A4 | 5008   | OSM      | L |
| 1286 | COL4A4 | 5270   | SERPINE2 | L |
| 1286 | COL4A4 | 6288   | SAA1     | L |
| 1286 | COL4A4 | 7045   | TGFBI    | L |
| 1286 | COL4A4 | 22918  | C1QR1    | L |
| 1286 | COL4A4 | 118429 | ANTXR2   | L |
| 1287 | COL4A5 | 1634   | DCN      | L |
| 1287 | COL4A5 | 2199   | FBLN2    | L |
| 1287 | COL4A5 | 2335   | FN1      | L |
| 1287 | COL4A5 | 3026   | HABP2    | L |
| 1287 | COL4A5 | 4147   | MATN2    | L |
| 1287 | COL4A5 | 4318   | MMP9     | L |
| 1287 | COL4A5 | 5008   | OSM      | L |
| 1287 | COL4A5 | 5270   | SERPINE2 | L |
| 1287 | COL4A5 | 9921   | RNF10    | S |
| 1287 | COL4A5 | 22918  | C1QR1    | L |

|      |         |       |           |   |
|------|---------|-------|-----------|---|
| 1288 | COL4A6  | 1634  | DCN       | L |
| 1288 | COL4A6  | 2199  | FBLN2     | L |
| 1288 | COL4A6  | 2335  | FN1       | L |
| 1288 | COL4A6  | 4147  | MATN2     | L |
| 1288 | COL4A6  | 4318  | MMP9      | L |
| 1288 | COL4A6  | 5008  | OSM       | L |
| 1288 | COL4A6  | 5270  | SERPINE2  | L |
| 1288 | COL4A6  | 22918 | C1QR1     | L |
| 1289 | COL5A1  | 3959  | LGALS3BP  | L |
| 1289 | COL5A1  | 5829  | PXN       | L |
| 1289 | COL5A1  | 7057  | THBS1     | L |
| 1289 | COL5A1  | 9672  | SDC3      | L |
| 1289 | COL5A1  | 50509 | COL5A3    | L |
| 1290 | COL5A2  | 5829  | PXN       | L |
| 1290 | COL5A2  | 7094  | TLN1      | L |
| 1291 | COL6A1  | 3912  | LAMB1     | L |
| 1291 | COL6A1  | 3959  | LGALS3BP  | L |
| 1291 | COL6A1  | 5829  | PXN       | L |
| 1292 | COL6A2  | 5825  | ABCD3     | L |
| 1292 | COL6A2  | 5829  | PXN       | L |
| 1294 | COL7A1  | 2335  | FN1       | L |
| 1294 | COL7A1  | 3312  | HSPA8     | S |
| 1294 | COL7A1  | 3911  | LAMA5     | L |
| 1294 | COL7A1  | 3914  | LAMB3     | L |
| 1294 | COL7A1  | 3918  | LAMC2     | L |
| 1294 | COL7A1  | 4313  | MMP2      | L |
| 1294 | COL7A1  | 7057  | THBS1     | L |
| 1294 | COL7A1  | 25827 | FBXL2     | S |
| 1294 | COL7A1  | 29066 | ZC3H7A    | S |
| 1294 | COL7A1  | 92799 | SHKBP1    | S |
| 1295 | COL8A1  | 1296  | COL8A2    | L |
| 1295 | COL8A1  | 3672  | ITGA1     | L |
| 1295 | COL8A1  | 3673  | ITGA2     | L |
| 1295 | COL8A1  | 5829  | PXN       | L |
| 1295 | COL8A1  | 7414  | VCL       | L |
| 1295 | COL8A1  | 30008 | EFEMP2    | R |
| 1295 | COL8A1  | 59349 | KLHL12    | R |
| 1295 | COL8A1  | 83755 | KRTAP4-12 | R |
| 1297 | COL9A1  | 4099  | MAG       | L |
| 1298 | COL9A2  | 4099  | MAG       | L |
| 1298 | COL9A2  | 9001  | HAP1      | S |
| 1298 | COL9A2  | 9638  | FEZ1      | S |
| 1298 | COL9A2  | 84273 | C4orf14   | S |
| 1299 | COL9A3  | 4099  | MAG       | L |
| 1300 | COL10A1 | 5034  | P4HB      | L |
| 1303 | COL12A1 | 5829  | PXN       | L |
| 1303 | COL12A1 | 7094  | TLN1      | L |
| 1305 | COL13A1 | 2335  | FN1       | L |
| 1305 | COL13A1 | 3339  | HSPG2     | L |
| 1305 | COL13A1 | 3672  | ITGA1     | L |
| 1305 | COL13A1 | 4811  | NID1      | L |
| 1305 | COL13A1 | 6678  | SPARC     | L |
| 1305 | COL13A1 | 22795 | NID2      | L |
| 1308 | COL17A1 | 1500  | CTNND1    | L |
| 1308 | COL17A1 | 3655  | ITGA6     | L |
| 1308 | COL17A1 | 3691  | ITGB4     | L |
| 1308 | COL17A1 | 3875  | KRT18     | L |
| 1308 | COL17A1 | 3898  | LAD1      | L |
| 1308 | COL17A1 | 5493  | PPL       | L |
| 1312 | COMT    | 1636  | ACE       | L |
| 1312 | COMT    | 9319  | TRIP13    | R |
| 1312 | COMT    | 9516  | LITAF     | S |
| 1312 | COMT    | 22803 | XRN2      | L |
| 1314 | COPA    | 5159  | PDGFRB    | L |
| 1314 | COPA    | 8402  | SLC25A11  | S |
| 1314 | COPA    | 9482  | STX8      | L |
| 1314 | COPA    | 11316 | COPE      | S |

|      |        |        |          |   |
|------|--------|--------|----------|---|
| 1314 | COPA   | 55738  | ARFGAP1  | L |
| 1315 | COPB   | 3135   | HLA-G    | L |
| 1315 | COPB   | 3777   | KCNK3    | L |
| 1315 | COPB   | 4591   | TRIM37   | R |
| 1315 | COPB   | 5159   | PDGFRB   | L |
| 1315 | COPB   | 5581   | PRKCE    | L |
| 1315 | COPB   | 5997   | RGS2     | L |
| 1315 | COPB   | 5999   | RGS4     | L |
| 1315 | COPB   | 6892   | TAPBP    | L |
| 1315 | COPB   | 8615   | VDP      | L |
| 1315 | COPB   | 8728   | ADAM19   | L |
| 1315 | COPB   | 10945  | KDELR1   | L |
| 1315 | COPB   | 22820  | COPG     | L |
| 1315 | COPB   | 23433  | RHOQ     | L |
| 1315 | COPB   | 26958  | COPG2    | L |
| 1316 | KLF6   | 1952   | CELSR2   | S |
| 1316 | KLF6   | 2975   | GTF3C1   | S |
| 1316 | KLF6   | 6667   | SP1      | L |
| 1316 | KLF6   | 9314   | KLF4     | L |
| 1316 | KLF6   | 10919  | EHMT2    | R |
| 1316 | KLF6   | 23649  | POLA2    | S |
| 1316 | KLF6   | 55937  | APOM     | S |
| 1316 | KLF6   | 56902  | LOC56902 | S |
| 1325 | CORT   | 2693   | GHSR     | L |
| 1325 | CORT   | 6751   | SSTR1    | L |
| 1325 | CORT   | 6752   | SSTR2    | L |
| 1325 | CORT   | 6753   | SSTR3    | L |
| 1325 | CORT   | 6754   | SSTR4    | L |
| 1325 | CORT   | 6755   | SSTR5    | L |
| 1325 | CORT   | 117194 | MRGPRX2  | L |
| 1326 | MAP3K8 | 4790   | NFKB1    | L |
| 1326 | MAP3K8 | 6416   | MAP2K4   | L |
| 1326 | MAP3K8 | 7186   | TRAF2    | L |
| 1326 | MAP3K8 | 9020   | MAP3K14  | L |
| 1345 | COX6C  | 5764   | PTN      | S |
| 1356 | CP     | 2512   | FTL      | L |
| 1356 | CP     | 2520   | GAST     | L |
| 1356 | CP     | 4057   | LTF      | L |
| 1356 | CP     | 5624   | PROC     | L |
| 1361 | CPB2   | 5340   | PLG      | L |
| 1361 | CPB2   | 5858   | PZP      | L |
| 1361 | CPB2   | 7056   | THBD     | L |
| 1363 | CPE    | 2641   | GCG      | L |
| 1363 | CPE    | 2975   | GTF3C1   | S |
| 1363 | CPE    | 4922   | NTS      | L |
| 1363 | CPE    | 5367   | PMCH     | L |
| 1363 | CPE    | 6092   | ROBO2    | S |
| 1363 | CPE    | 6117   | RPA1     | S |
| 1363 | CPE    | 10813  | UTP14A   | S |
| 1363 | CPE    | 23649  | POLA2    | S |
| 1363 | CPE    | 26073  | POLDIP2  | S |
| 1363 | CPE    | 51003  | MED31    | S |
| 1363 | CPE    | 55791  | C1orf103 | S |
| 1364 | CLDN4  | 7082   | TJP1     | L |
| 1365 | CLDN3  | 7082   | TJP1     | L |
| 1365 | CLDN3  | 7122   | CLDN5    | L |
| 1365 | CLDN3  | 9076   | CLDN1    | L |
| 1366 | CLDN7  | 7082   | TJP1     | L |
| 1366 | CLDN7  | 84528  | PEPP-2   | R |
| 1371 | CPOX   | 6622   | SNCA     | L |
| 1378 | CR1    | 1380   | CR2      | L |
| 1378 | CR1    | 1604   | DAF      | L |
| 1378 | CR1    | 2526   | FUT4     | L |
| 1380 | CR2    | 2208   | FCER2    | L |
| 1380 | CR2    | 3192   | HNRPU    | L |
| 1380 | CR2    | 3439   | IFNA1    | L |
| 1380 | CR2    | 7157   | TP53     | L |

|      |        |       |          |   |
|------|--------|-------|----------|---|
| 1380 | CR2    | 8519  | IFITM1   | L |
| 1381 | CRABP1 | 4356  | MPP3     | S |
| 1385 | CREB1  | 1387  | CREBBP   | L |
| 1385 | CREB1  | 1390  | CREM     | L |
| 1385 | CREB1  | 1432  | MAPK14   | L |
| 1385 | CREB1  | 2736  | GLI2     | L |
| 1385 | CREB1  | 2908  | NR3C1    | L |
| 1385 | CREB1  | 2963  | GTF2F2   | L |
| 1385 | CREB1  | 3651  | IPF1     | L |
| 1385 | CREB1  | 5861  | RAB1A    | S |
| 1385 | CREB1  | 7431  | VIM      | S |
| 1385 | CREB1  | 7528  | YY1      | L |
| 1385 | CREB1  | 8721  | EDF1     | L |
| 1385 | CREB1  | 8986  | RPS6KA4  | L |
| 1385 | CREB1  | 9400  | RECQL5   | S |
| 1385 | CREB1  | 9457  | FHL5     | L |
| 1385 | CREB1  | 10524 | HTATIP   | L |
| 1385 | CREB1  | 11161 | C14orf1  | S |
| 1385 | CREB1  | 30818 | CSEN     | L |
| 1385 | CREB1  | 79803 | HPS6     | S |
| 1386 | ATF2   | 1432  | MAPK14   | L |
| 1386 | ATF2   | 1457  | CSNK2A1  | L |
| 1386 | ATF2   | 1459  | CSNK2A2  | L |
| 1386 | ATF2   | 1649  | DDIT3    | L |
| 1386 | ATF2   | 2353  | FOS      | L |
| 1386 | ATF2   | 2354  | FOSB     | L |
| 1386 | ATF2   | 2355  | FOSL2    | L |
| 1386 | ATF2   | 2963  | GTF2F2   | L |
| 1386 | ATF2   | 3159  | HMGA1    | L |
| 1386 | ATF2   | 3725  | JUN      | L |
| 1386 | ATF2   | 3726  | JUNB     | L |
| 1386 | ATF2   | 3727  | JUND     | L |
| 1386 | ATF2   | 4088  | SMAD3    | L |
| 1386 | ATF2   | 4089  | SMAD4    | L |
| 1386 | ATF2   | 5599  | MAPK8    | L |
| 1386 | ATF2   | 5603  | MAPK13   | L |
| 1386 | ATF2   | 5925  | RB1      | L |
| 1386 | ATF2   | 7329  | UBE2I    | L |
| 1386 | ATF2   | 7528  | YY1      | L |
| 1386 | ATF2   | 8061  | FOSL1    | L |
| 1386 | ATF2   | 8550  | MAPKAPK5 | L |
| 1386 | ATF2   | 8721  | EDF1     | L |
| 1386 | ATF2   | 9586  | CREB5    | L |
| 1386 | ATF2   | 10538 | BATF     | L |
| 1386 | ATF2   | 11016 | ATF7     | L |
| 1386 | ATF2   | 55509 | SNFT     | L |
| 1387 | CREBBP | 1445  | CSK      | L |
| 1387 | CREBBP | 1457  | CSNK2A1  | L |
| 1387 | CREBBP | 1459  | CSNK2A2  | L |
| 1387 | CREBBP | 1523  | CUTL1    | L |
| 1387 | CREBBP | 1655  | DDX5     | L |
| 1387 | CREBBP | 1879  | EBF      | L |
| 1387 | CREBBP | 1958  | EGR1     | L |
| 1387 | CREBBP | 2122  | EVI1     | L |
| 1387 | CREBBP | 2130  | EWSR1    | L |
| 1387 | CREBBP | 2308  | FOXO1A   | L |
| 1387 | CREBBP | 2908  | NR3C1    | L |
| 1387 | CREBBP | 3064  | HD       | L |
| 1387 | CREBBP | 3091  | HIF1A    | L |
| 1387 | CREBBP | 3172  | HNF4A    | L |
| 1387 | CREBBP | 3175  | ONECUT1  | L |
| 1387 | CREBBP | 3217  | HOXB7    | L |
| 1387 | CREBBP | 3297  | HSF1     | L |
| 1387 | CREBBP | 3661  | IRF3     | L |
| 1387 | CREBBP | 3725  | JUN      | L |
| 1387 | CREBBP | 4087  | SMAD2    | L |
| 1387 | CREBBP | 4094  | MAF      | L |

|      |        |       |         |   |
|------|--------|-------|---------|---|
| 1387 | CREBBP | 4097  | MAFG    | L |
| 1387 | CREBBP | 4255  | MGMT    | L |
| 1387 | CREBBP | 4297  | MLL     | L |
| 1387 | CREBBP | 4303  | MLLT7   | L |
| 1387 | CREBBP | 4435  | CITED1  | L |
| 1387 | CREBBP | 4487  | MSX1    | L |
| 1387 | CREBBP | 4602  | MYB     | L |
| 1387 | CREBBP | 4605  | MYBL2   | L |
| 1387 | CREBBP | 4654  | MYOD1   | L |
| 1387 | CREBBP | 4762  | NEUROG1 | L |
| 1387 | CREBBP | 4773  | NFATC2  | L |
| 1387 | CREBBP | 4776  | NFATC4  | L |
| 1387 | CREBBP | 4780  | NFE2L2  | L |
| 1387 | CREBBP | 4928  | NUP98   | L |
| 1387 | CREBBP | 5371  | PML     | L |
| 1387 | CREBBP | 5430  | POLR2A  | L |
| 1387 | CREBBP | 5629  | PROX1   | L |
| 1387 | CREBBP | 5757  | PTMA    | L |
| 1387 | CREBBP | 5928  | RBBP4   | L |
| 1387 | CREBBP | 5970  | RELA    | L |
| 1387 | CREBBP | 6195  | RPS6KA1 | L |
| 1387 | CREBBP | 6197  | RPS6KA3 | L |
| 1387 | CREBBP | 6721  | SREBF2  | L |
| 1387 | CREBBP | 6772  | STAT1   | L |
| 1387 | CREBBP | 6773  | STAT2   | L |
| 1387 | CREBBP | 6778  | STAT6   | L |
| 1387 | CREBBP | 6927  | TCF1    | L |
| 1387 | CREBBP | 6929  | TCF3    | L |
| 1387 | CREBBP | 6996  | TDG     | L |
| 1387 | CREBBP | 7157  | TP53    | L |
| 1387 | CREBBP | 7533  | YWHAH   | L |
| 1387 | CREBBP | 8092  | CART1   | L |
| 1387 | CREBBP | 8202  | NCOA3   | L |
| 1387 | CREBBP | 8648  | NCOA1   | L |
| 1387 | CREBBP | 8850  | PCAF    | L |
| 1387 | CREBBP | 8932  | MBD2    | L |
| 1387 | CREBBP | 9314  | KLF4    | L |
| 1387 | CREBBP | 9325  | TRIP4   | L |
| 1387 | CREBBP | 9794  | MAML1   | L |
| 1387 | CREBBP | 10370 | CITED2  | L |
| 1387 | CREBBP | 10657 | KHDRBS1 | L |
| 1387 | CREBBP | 26039 | SS18L1  | L |
| 1387 | CREBBP | 27043 | PELP1   | L |
| 1387 | CREBBP | 28996 | HIPK2   | L |
| 1387 | CREBBP | 55728 | N4BP2   | L |
| 1387 | CREBBP | 55809 | TRERF1  | L |
| 1387 | CREBBP | 79753 | SNIP1   | L |
| 1388 | CREBL1 | 4802  | NFYC    | L |
| 1388 | CREBL1 | 8720  | MBTPS1  | L |
| 1388 | CREBL1 | 51360 | MBTPS2  | L |
| 1390 | CREM   | 3725  | JUN     | L |
| 1390 | CREM   | 4783  | NFIL3   | L |
| 1390 | CREM   | 6688  | SPI1    | L |
| 1390 | CREM   | 6874  | TAF4    | L |
| 1390 | CREM   | 6908  | TBP     | L |
| 1390 | CREM   | 9457  | FHL5    | L |
| 1390 | CREM   | 30818 | CSEN    | L |
| 1390 | CREM   | 84699 | CREB3L3 | L |
| 1390 | CREM   | 90993 | CREB3L1 | L |
| 1392 | CRH    | 1394  | CRHR1   | L |
| 1392 | CRH    | 1395  | CRHR2   | L |
| 1393 | CRHBP  | 7349  | UCN     | L |
| 1394 | CRHR1  | 2770  | GNAI1   | L |
| 1394 | CRHR1  | 2775  | GNAO1   | L |
| 1394 | CRHR1  | 2776  | GNAQ    | L |
| 1394 | CRHR1  | 2778  | GNAS    | L |
| 1395 | CRHR2  | 7349  | UCN     | L |

|      |       |       |          |   |
|------|-------|-------|----------|---|
| 1396 | CRIP1 | 6457  | SH3GL3   | S |
| 1396 | CRIP1 | 9001  | HAP1     | S |
| 1396 | CRIP1 | 9737  | GPRASP1  | S |
| 1397 | CRIP2 | 6722  | SRF      | L |
| 1398 | CRK   | 1399  | CRKL     | L |
| 1398 | CRK   | 1795  | DOCK3    | L |
| 1398 | CRK   | 2042  | EPHA3    | L |
| 1398 | CRK   | 2049  | EPHB3    | L |
| 1398 | CRK   | 2060  | EPS15    | L |
| 1398 | CRK   | 2185  | PTK2B    | L |
| 1398 | CRK   | 2549  | GAB1     | L |
| 1398 | CRK   | 5156  | PDGFRA   | L |
| 1398 | CRK   | 5159  | PDGFRB   | L |
| 1398 | CRK   | 5359  | PLSCR1   | R |
| 1398 | CRK   | 5599  | MAPK8    | L |
| 1398 | CRK   | 5706  | PSMC6    | R |
| 1398 | CRK   | 5829  | PXN      | L |
| 1398 | CRK   | 6461  | SHB      | L |
| 1398 | CRK   | 6853  | SYN1     | L |
| 1398 | CRK   | 7465  | WEE1     | L |
| 1398 | CRK   | 7514  | XPO1     | L |
| 1398 | CRK   | 7535  | ZAP70    | L |
| 1398 | CRK   | 8471  | IRS4     | L |
| 1398 | CRK   | 11183 | MAP4K5   | L |
| 1398 | CRK   | 11184 | MAP4K1   | L |
| 1398 | CRK   | 23616 | SH3BP1   | L |
| 1398 | CRK   | 23624 | CBLC     | L |
| 1398 | CRK   | 55211 | DPPA4    | R |
| 1398 | CRK   | 80725 | SNIP     | L |
| 1399 | CRKL  | 1794  | DOCK2    | L |
| 1399 | CRKL  | 1796  | DOK1     | L |
| 1399 | CRKL  | 2057  | EPOR     | L |
| 1399 | CRKL  | 2209  | FCGR1A   | L |
| 1399 | CRKL  | 2549  | GAB1     | L |
| 1399 | CRKL  | 2885  | GRB2     | L |
| 1399 | CRKL  | 3454  | IFNAR1   | L |
| 1399 | CRKL  | 3815  | KIT      | L |
| 1399 | CRKL  | 5156  | PDGFRA   | L |
| 1399 | CRKL  | 5295  | PIK3R1   | L |
| 1399 | CRKL  | 5296  | PIK3R2   | L |
| 1399 | CRKL  | 5829  | PXN      | L |
| 1399 | CRKL  | 6464  | SHC1     | L |
| 1399 | CRKL  | 6654  | SOS1     | L |
| 1399 | CRKL  | 6776  | STAT5A   | L |
| 1399 | CRKL  | 6850  | SYK      | L |
| 1399 | CRKL  | 7041  | TGFB111  | L |
| 1399 | CRKL  | 7297  | TYK2     | L |
| 1399 | CRKL  | 7454  | WAS      | L |
| 1399 | CRKL  | 8471  | IRS4     | L |
| 1399 | CRKL  | 9564  | BCAR1    | L |
| 1399 | CRKL  | 11183 | MAP4K5   | L |
| 1399 | CRKL  | 11184 | MAP4K1   | L |
| 1399 | CRKL  | 29760 | BLNK     | L |
| 1399 | CRKL  | 51466 | EVL      | L |
| 1400 | CRMP1 | 1808  | DPYSL2   | L |
| 1400 | CRMP1 | 1936  | EEF1D    | S |
| 1400 | CRMP1 | 2495  | FTH1     | S |
| 1400 | CRMP1 | 3146  | HMGB1    | S |
| 1400 | CRMP1 | 3187  | HNRPH1   | S |
| 1400 | CRMP1 | 3189  | HNRPH3   | S |
| 1400 | CRMP1 | 3336  | HSPE1    | S |
| 1400 | CRMP1 | 4729  | NDUFV2   | S |
| 1400 | CRMP1 | 4931  | NVL      | S |
| 1400 | CRMP1 | 5050  | PAFAH1B3 | S |
| 1400 | CRMP1 | 5216  | PFN1     | S |
| 1400 | CRMP1 | 5272  | SERPINB9 | S |
| 1400 | CRMP1 | 5320  | PLA2G2A  | S |

|      |        |        |           |   |
|------|--------|--------|-----------|---|
| 1400 | CRMP1  | 5511   | PPP1R8    | S |
| 1400 | CRMP1  | 5717   | PSMD11    | S |
| 1400 | CRMP1  | 5863   | RGL2      | S |
| 1400 | CRMP1  | 6093   | ROCK1     | L |
| 1400 | CRMP1  | 6118   | RPA2      | S |
| 1400 | CRMP1  | 6183   | MRPS12    | S |
| 1400 | CRMP1  | 6303   | SAT       | S |
| 1400 | CRMP1  | 6362   | CCL18     | S |
| 1400 | CRMP1  | 6637   | SNRPG     | S |
| 1400 | CRMP1  | 7083   | TK1       | S |
| 1400 | CRMP1  | 7320   | UBE2B     | S |
| 1400 | CRMP1  | 7572   | ZNF24     | S |
| 1400 | CRMP1  | 8087   | FXR1      | S |
| 1400 | CRMP1  | 8312   | AXIN1     | S |
| 1400 | CRMP1  | 8880   | FUBP1     | S |
| 1400 | CRMP1  | 8886   | DDX18     | S |
| 1400 | CRMP1  | 8888   | MCM3AP    | S |
| 1400 | CRMP1  | 8894   | EIF2S2    | S |
| 1400 | CRMP1  | 9319   | TRIP13    | S |
| 1400 | CRMP1  | 10342  | TFG       | S |
| 1400 | CRMP1  | 10551  | AGR2      | S |
| 1400 | CRMP1  | 10574  | CCT7      | S |
| 1400 | CRMP1  | 11100  | HNRPUL1   | S |
| 1400 | CRMP1  | 11243  | PMF1      | S |
| 1400 | CRMP1  | 22929  | SEPHS1    | S |
| 1400 | CRMP1  | 25843  | PREI3     | S |
| 1400 | CRMP1  | 26151  | NAT9      | S |
| 1400 | CRMP1  | 27252  | KLHL20    | S |
| 1400 | CRMP1  | 29903  | HSU79303  | S |
| 1400 | CRMP1  | 29924  | EPN1      | S |
| 1400 | CRMP1  | 54622  | ARFRP2    | S |
| 1400 | CRMP1  | 55227  | LRRC1     | S |
| 1400 | CRMP1  | 55643  | BTBD2     | S |
| 1400 | CRMP1  | 55755  | CDK5RAP2  | S |
| 1400 | CRMP1  | 57142  | RTN4      | S |
| 1400 | CRMP1  | 57819  | LSM2      | S |
| 1400 | CRMP1  | 79756  | (null)    | S |
| 1400 | CRMP1  | 80279  | CDK5RAP3  | S |
| 1400 | CRMP1  | 90865  | C9orf26   | S |
| 1400 | CRMP1  | 307255 | (null)    | S |
| 1401 | CRP    | 2209   | FCGR1A    | L |
| 1401 | CRP    | 2212   | FCGR2A    | L |
| 1401 | CRP    | 2213   | FCGR2B    | L |
| 1401 | CRP    | 2335   | FN1       | L |
| 1401 | CRP    | 3075   | CFH       | L |
| 1401 | CRP    | 6625   | SNRP70    | L |
| 1404 | HAPLN1 | 1462   | CSPG2     | L |
| 1406 | CRX    | 4188   | MDFI      | R |
| 1406 | CRX    | 4901   | NRL       | L |
| 1406 | CRX    | 6314   | ATXN7     | L |
| 1406 | CRX    | 130951 | LOC130951 | R |
| 1407 | CRY1   | 1454   | CSNK1E    | L |
| 1407 | CRY1   | 4188   | MDFI      | R |
| 1407 | CRY1   | 5187   | PER1      | L |
| 1407 | CRY1   | 5359   | PLSCR1    | R |
| 1407 | CRY1   | 7186   | TRAF2     | R |
| 1407 | CRY1   | 8863   | PER3      | L |
| 1407 | CRY1   | 8864   | PER2      | L |
| 1407 | CRY1   | 8914   | TIMELESS  | L |
| 1407 | CRY1   | 83755  | KRTAP4-12 | R |
| 1408 | CRY2   | 5187   | PER1      | L |
| 1408 | CRY2   | 5536   | PPP5C     | L |
| 1408 | CRY2   | 8864   | PER2      | L |
| 1409 | CRYAA  | 1410   | CRYAB     | L |
| 1409 | CRYAA  | 1415   | CRYBB2    | L |
| 1409 | CRYAA  | 1420   | CRYGC     | L |
| 1409 | CRYAA  | 1429   | CRYZ      | L |



|      |        |        |           |   |
|------|--------|--------|-----------|---|
| 1409 | CRYAA  | 1431   | CS        | L |
| 1409 | CRYAA  | 3315   | HSPB1     | L |
| 1409 | CRYAA  | 3906   | LALBA     | L |
| 1409 | CRYAA  | 4284   | MIP       | L |
| 1410 | CRYAB  | 1415   | CRYBB2    | L |
| 1410 | CRYAB  | 1420   | CRYGC     | L |
| 1410 | CRYAB  | 1431   | CS        | L |
| 1410 | CRYAB  | 3315   | HSPB1     | L |
| 1410 | CRYAB  | 5684   | PSMA3     | L |
| 1412 | CRYBA2 | 57658  | CALCOCO1  | R |
| 1414 | CRYBB1 | 6833   | ABCC8     | L |
| 1415 | CRYBB2 | 1420   | CRYGC     | L |
| 1415 | CRYBB2 | 3315   | HSPB1     | L |
| 1420 | CRYGC  | 3315   | HSPB1     | L |
| 1431 | CS     | 4191   | MDH2      | L |
| 1431 | CS     | 8655   | DNCL1     | L |
| 1432 | MAPK14 | 1459   | CSNK2A2   | L |
| 1432 | MAPK14 | 1649   | DDIT3     | L |
| 1432 | MAPK14 | 1843   | DUSP1     | L |
| 1432 | MAPK14 | 1844   | DUSP2     | L |
| 1432 | MAPK14 | 1846   | DUSP4     | L |
| 1432 | MAPK14 | 2002   | ELK1      | L |
| 1432 | MAPK14 | 2316   | FLNA      | L |
| 1432 | MAPK14 | 2764   | GMFB      | L |
| 1432 | MAPK14 | 2885   | GRB2      | L |
| 1432 | MAPK14 | 3875   | KRT18     | L |
| 1432 | MAPK14 | 4092   | SMAD7     | L |
| 1432 | MAPK14 | 4141   | MARS      | L |
| 1432 | MAPK14 | 4205   | MEF2A     | L |
| 1432 | MAPK14 | 4208   | MEF2C     | L |
| 1432 | MAPK14 | 5371   | PML       | L |
| 1432 | MAPK14 | 5594   | MAPK1     | L |
| 1432 | MAPK14 | 5595   | MAPK3     | L |
| 1432 | MAPK14 | 5604   | MAP2K1    | L |
| 1432 | MAPK14 | 5606   | MAP2K3    | L |
| 1432 | MAPK14 | 5608   | MAP2K6    | L |
| 1432 | MAPK14 | 5778   | PTPN7     | L |
| 1432 | MAPK14 | 6416   | MAP2K4    | L |
| 1432 | MAPK14 | 7867   | MAPKAPK3  | L |
| 1432 | MAPK14 | 8569   | MKNK1     | L |
| 1432 | MAPK14 | 8986   | RPS6KA4   | L |
| 1432 | MAPK14 | 9043   | SPAG9     | L |
| 1432 | MAPK14 | 9149   | DYRK1B    | L |
| 1432 | MAPK14 | 9255   | SCYE1     | L |
| 1432 | MAPK14 | 9261   | MAPKAPK2  | L |
| 1432 | MAPK14 | 10454  | MAP3K7IP1 | L |
| 1432 | MAPK14 | 23770  | FKBP8     | S |
| 1432 | MAPK14 | 27347  | STK39     | L |
| 1432 | MAPK14 | 27429  | HTRA2     | L |
| 1432 | MAPK14 | 80824  | DUSP16    | L |
| 1434 | CSE1L  | 3191   | HNRPL     | S |
| 1434 | CSE1L  | 5536   | PPP5C     | S |
| 1434 | CSE1L  | 5901   | RAN       | L |
| 1434 | CSE1L  | 6146   | RPL22     | S |
| 1434 | CSE1L  | 23633  | KPNA6     | L |
| 1434 | CSE1L  | 80021  | TMEM62    | S |
| 1435 | CSF1   | 1436   | CSF1R     | L |
| 1435 | CSF1   | 7124   | TNF       | L |
| 1435 | CSF1   | 8651   | SOCS1     | L |
| 1435 | CSF1   | 139716 | GAB3      | L |
| 1436 | CSF1R  | 2534   | FYN       | L |
| 1436 | CSF1R  | 2885   | GRB2      | L |
| 1436 | CSF1R  | 4067   | LYN       | L |
| 1436 | CSF1R  | 5295   | PIK3R1    | L |
| 1436 | CSF1R  | 5296   | PIK3R2    | L |
| 1436 | CSF1R  | 5921   | RASA1     | L |
| 1436 | CSF1R  | 7525   | YES1      | L |

|      |         |       |          |   |
|------|---------|-------|----------|---|
| 1436 | CSF1R   | 8651  | SOCS1    | L |
| 1436 | CSF1R   | 9021  | SOCS3    | L |
| 1436 | CSF1R   | 9402  | GRAP2    | L |
| 1437 | CSF2    | 1438  | CSF2RA   | L |
| 1437 | CSF2    | 1439  | CSF2RB   | L |
| 1437 | CSF2    | 1441  | CSF3R    | L |
| 1437 | CSF2    | 4254  | KITLG    | L |
| 1437 | CSF2    | 5553  | PRG2     | L |
| 1437 | CSF2    | 6383  | SDC2     | L |
| 1438 | CSF2RA  | 1439  | CSF2RB   | L |
| 1438 | CSF2RA  | 5295  | PIK3R1   | L |
| 1439 | CSF2RB  | 2057  | EPOR     | L |
| 1439 | CSF2RB  | 3562  | IL3      | L |
| 1439 | CSF2RB  | 3568  | IL5RA    | L |
| 1439 | CSF2RB  | 4067  | LYN      | L |
| 1439 | CSF2RB  | 4085  | MAD2L1   | L |
| 1439 | CSF2RB  | 5777  | PTPN6    | L |
| 1439 | CSF2RB  | 5781  | PTPN11   | L |
| 1439 | CSF2RB  | 6464  | SHC1     | L |
| 1439 | CSF2RB  | 7534  | YWHAZ    | L |
| 1439 | CSF2RB  | 10399 | GNB2L1   | L |
| 1440 | CSF3    | 1441  | CSF3R    | L |
| 1441 | CSF3R   | 2885  | GRB2     | L |
| 1441 | CSF3R   | 3055  | HCK      | L |
| 1441 | CSF3R   | 3716  | JAK1     | L |
| 1441 | CSF3R   | 3717  | JAK2     | L |
| 1441 | CSF3R   | 4067  | LYN      | L |
| 1441 | CSF3R   | 5781  | PTPN11   | L |
| 1441 | CSF3R   | 6464  | SHC1     | L |
| 1441 | CSF3R   | 6850  | SYK      | L |
| 1442 | CSH1    | 4087  | SMAD2    | L |
| 1442 | CSH1    | 4089  | SMAD4    | L |
| 1442 | CSH1    | 4093  | SMAD9    | L |
| 1442 | CSH1    | 5782  | PTPN12   | L |
| 1443 | CSH2    | 4088  | SMAD3    | L |
| 1443 | CSH2    | 5430  | POLR2A   | L |
| 1444 | CSHL1   | 84441 | MAML2    | L |
| 1445 | CSK     | 1601  | DAB2     | L |
| 1445 | CSK     | 2534  | FYN      | L |
| 1445 | CSK     | 3190  | HNRPK    | L |
| 1445 | CSK     | 3480  | IGF1R    | L |
| 1445 | CSK     | 3643  | INSR     | L |
| 1445 | CSK     | 5175  | PECAM1   | L |
| 1445 | CSK     | 5338  | PLD2     | L |
| 1445 | CSK     | 5747  | PTK2     | L |
| 1445 | CSK     | 5782  | PTPN12   | L |
| 1445 | CSK     | 5829  | PXN      | L |
| 1445 | CSK     | 5921  | RASA1    | L |
| 1445 | CSK     | 6464  | SHC1     | L |
| 1445 | CSK     | 6714  | SRC      | L |
| 1445 | CSK     | 9672  | SDC3     | L |
| 1445 | CSK     | 26469 | PTPN18   | L |
| 1445 | CSK     | 27240 | SIT1     | L |
| 1445 | CSK     | 55824 | PAG1     | L |
| 1446 | CSN1S1  | 6789  | STK4     | L |
| 1446 | CSN1S1  | 84630 | TTBK1    | L |
| 1447 | CSN2    | 1448  | CSN3     | L |
| 1447 | CSN2    | 1990  | ELA1     | L |
| 1447 | CSN2    | 4750  | NEK1     | L |
| 1448 | CSN3    | 1459  | CSNK2A2  | L |
| 1452 | CSNK1A1 | 3146  | HMGB1    | L |
| 1452 | CSNK1A1 | 3148  | HMGB2    | L |
| 1452 | CSNK1A1 | 3838  | KPNA2    | L |
| 1452 | CSNK1A1 | 5525  | PPP2R5A  | L |
| 1452 | CSNK1A1 | 7133  | TNFRSF1B | L |
| 1452 | CSNK1A1 | 8312  | AXIN1    | L |
| 1452 | CSNK1A1 | 8546  | AP3B1    | L |

|      |         |       |          |   |
|------|---------|-------|----------|---|
| 1452 | CSNK1A1 | 11033 | CENTA1   | L |
| 1453 | CSNK1D  | 1855  | DVL1     | L |
| 1453 | CSNK1D  | 1857  | DVL3     | R |
| 1453 | CSNK1D  | 2697  | GJA1     | L |
| 1453 | CSNK1D  | 5187  | PER1     | L |
| 1453 | CSNK1D  | 7157  | TP53     | L |
| 1453 | CSNK1D  | 8863  | PER3     | L |
| 1453 | CSNK1D  | 10142 | AKAP9    | L |
| 1453 | CSNK1D  | 55738 | ARFGAP1  | L |
| 1454 | CSNK1E  | 1855  | DVL1     | L |
| 1454 | CSNK1E  | 1856  | DVL2     | R |
| 1454 | CSNK1E  | 5187  | PER1     | L |
| 1454 | CSNK1E  | 7157  | TP53     | L |
| 1454 | CSNK1E  | 8312  | AXIN1    | L |
| 1454 | CSNK1E  | 8863  | PER3     | L |
| 1454 | CSNK1E  | 10142 | AKAP9    | L |
| 1454 | CSNK1E  | 22881 | ANKRD6   | L |
| 1454 | CSNK1E  | 25788 | RAD54B   | R |
| 1455 | CSNK1G2 | 4690  | NCK1     | L |
| 1455 | CSNK1G2 | 10087 | COL4A3BP | R |
| 1457 | CSNK2A1 | 1460  | CSNK2B   | L |
| 1457 | CSNK2A1 | 1649  | DDIT3    | L |
| 1457 | CSNK2A1 | 1855  | DVL1     | L |
| 1457 | CSNK2A1 | 1857  | DVL3     | L |
| 1457 | CSNK2A1 | 1936  | EEF1D    | L |
| 1457 | CSNK2A1 | 2246  | FGF1     | L |
| 1457 | CSNK2A1 | 2247  | FGF2     | L |
| 1457 | CSNK2A1 | 2353  | FOS      | L |
| 1457 | CSNK2A1 | 2668  | GDNF     | L |
| 1457 | CSNK2A1 | 2972  | BRF1     | L |
| 1457 | CSNK2A1 | 3066  | HDAC2    | L |
| 1457 | CSNK2A1 | 3181  | HNRPA2B1 | L |
| 1457 | CSNK2A1 | 3660  | IRF2     | L |
| 1457 | CSNK2A1 | 3725  | JUN      | L |
| 1457 | CSNK2A1 | 4255  | MGMT     | L |
| 1457 | CSNK2A1 | 4691  | NCL      | L |
| 1457 | CSNK2A1 | 5048  | PAFAH1B1 | L |
| 1457 | CSNK2A1 | 5058  | PAK1     | L |
| 1457 | CSNK2A1 | 5300  | PIN1     | L |
| 1457 | CSNK2A1 | 5685  | PSMA4    | L |
| 1457 | CSNK2A1 | 5970  | RELA     | L |
| 1457 | CSNK2A1 | 6125  | RPL5     | L |
| 1457 | CSNK2A1 | 6689  | SPIB     | L |
| 1457 | CSNK2A1 | 7150  | TOP1     | L |
| 1457 | CSNK2A1 | 7184  | TRA1     | L |
| 1457 | CSNK2A1 | 7343  | UBTF     | L |
| 1457 | CSNK2A1 | 8894  | EIF2S2   | L |
| 1457 | CSNK2A1 | 9158  | FIBP     | L |
| 1457 | CSNK2A1 | 10661 | KLF1     | L |
| 1457 | CSNK2A1 | 11244 | ZHX1     | S |
| 1459 | CSNK2A2 | 1460  | CSNK2B   | L |
| 1459 | CSNK2A2 | 2246  | FGF1     | L |
| 1459 | CSNK2A2 | 2247  | FGF2     | L |
| 1459 | CSNK2A2 | 2353  | FOS      | L |
| 1459 | CSNK2A2 | 2668  | GDNF     | L |
| 1459 | CSNK2A2 | 3320  | HSPCA    | L |
| 1459 | CSNK2A2 | 5058  | PAK1     | L |
| 1459 | CSNK2A2 | 5300  | PIN1     | L |
| 1459 | CSNK2A2 | 7184  | TRA1     | L |
| 1459 | CSNK2A2 | 10661 | KLF1     | L |
| 1460 | CSNK2B  | 2246  | FGF1     | L |
| 1460 | CSNK2B  | 4067  | LYN      | L |
| 1460 | CSNK2B  | 4528  | MTIF2    | L |
| 1460 | CSNK2B  | 4687  | NCF1     | L |
| 1460 | CSNK2B  | 5300  | PIN1     | L |
| 1460 | CSNK2B  | 5590  | PRKCZ    | L |
| 1460 | CSNK2B  | 6125  | RPL5     | L |

|      |          |       |            |   |
|------|----------|-------|------------|---|
| 1460 | CSNK2B   | 6470  | SHMT1      | L |
| 1460 | CSNK2B   | 6472  | SHMT2      | L |
| 1460 | CSNK2B   | 7155  | TOP2B      | L |
| 1460 | CSNK2B   | 7157  | TP53       | L |
| 1460 | CSNK2B   | 8099  | CDK2AP1    | L |
| 1460 | CSNK2B   | 8894  | EIF2S2     | L |
| 1460 | CSNK2B   | 8930  | MBD4       | L |
| 1460 | CSNK2B   | 9158  | FIBP       | L |
| 1460 | CSNK2B   | 9221  | NOLC1      | L |
| 1460 | CSNK2B   | 9332  | CD163      | L |
| 1460 | CSNK2B   | 9616  | RNF7       | L |
| 1460 | CSNK2B   | 10467 | ZNHIT1     | L |
| 1460 | CSNK2B   | 11124 | FAF1       | L |
| 1460 | CSNK2B   | 90480 | GADD45GIP1 | L |
| 1462 | CSPG2    | 2192  | FBLN1      | L |
| 1462 | CSPG2    | 2199  | FBLN2      | L |
| 1462 | CSPG2    | 2200  | FBN1       | L |
| 1462 | CSPG2    | 3627  | CXCL10     | L |
| 1462 | CSPG2    | 3676  | ITGA4      | L |
| 1462 | CSPG2    | 3688  | ITGB1      | L |
| 1462 | CSPG2    | 5320  | PLA2G2A    | L |
| 1462 | CSPG2    | 6347  | CCL2       | L |
| 1462 | CSPG2    | 6352  | CCL5       | L |
| 1462 | CSPG2    | 6355  | CCL8       | L |
| 1462 | CSPG2    | 6364  | CCL20      | L |
| 1462 | CSPG2    | 6366  | CCL21      | L |
| 1462 | CSPG2    | 6375  | XCL1       | L |
| 1462 | CSPG2    | 6403  | SELP       | L |
| 1462 | CSPG2    | 7143  | TNR        | L |
| 1463 | CSPG3    | 3146  | HMGB1      | L |
| 1463 | CSPG3    | 3371  | TNC        | L |
| 1463 | CSPG3    | 3897  | L1CAM      | L |
| 1463 | CSPG3    | 4684  | NCAM1      | L |
| 1463 | CSPG3    | 5764  | PTN        | L |
| 1463 | CSPG3    | 6900  | CNTN2      | L |
| 1464 | CSPG4    | 5747  | PTK2       | L |
| 1464 | CSPG4    | 8777  | MPDZ       | L |
| 1464 | CSPG4    | 9564  | BCAR1      | L |
| 1464 | CSPG4    | 10188 | TNK2       | L |
| 1464 | CSPG4    | 55729 | ATF7IP     | L |
| 1466 | CSRP2    | 8554  | PIAS1      | L |
| 1468 | SLC25A10 | 6993  | TCTEL1     | L |
| 1468 | SLC25A10 | 8655  | DNCL1      | L |
| 1468 | SLC25A10 | 22924 | MAPRE3     | L |
| 1468 | SLC25A10 | 83755 | KRTAP4-12  | R |
| 1471 | CST3     | 1508  | CTSB       | L |
| 1471 | CST3     | 1520  | CTSS       | L |
| 1471 | CST3     | 23037 | PDZK3      | L |
| 1473 | CST5     | 1520  | CTSS       | L |
| 1475 | CSTA     | 1508  | CTSB       | L |
| 1475 | CSTA     | 1512  | CTSH       | L |
| 1475 | CSTA     | 1514  | CTSL       | L |
| 1475 | CSTA     | 5764  | PTN        | S |
| 1476 | CSTB     | 1508  | CTSB       | L |
| 1476 | CSTB     | 1509  | CTSD       | L |
| 1476 | CSTB     | 1512  | CTSH       | L |
| 1476 | CSTB     | 1514  | CTSL       | L |
| 1477 | CSTF1    | 1479  | CSTF3      | L |
| 1478 | CSTF2    | 1479  | CSTF3      | L |
| 1478 | CSTF2    | 1653  | DDX1       | L |
| 1478 | CSTF2    | 1891  | ECH1       | S |
| 1478 | CSTF2    | 1937  | EEF1G      | S |
| 1478 | CSTF2    | 7917  | BAT3       | S |
| 1478 | CSTF2    | 8189  | SYMPK      | L |
| 1478 | CSTF2    | 8518  | IKBKAP     | S |
| 1478 | CSTF2    | 9638  | FEZ1       | S |
| 1478 | CSTF2    | 10524 | HTATIP     | S |

|      |        |        |          |   |
|------|--------|--------|----------|---|
| 1478 | CSTF2  | 10923  | SUB1     | L |
| 1478 | CSTF2  | 10989  | IMMT     | S |
| 1478 | CSTF2  | 11161  | C14orf1  | S |
| 1478 | CSTF2  | 29979  | UBQLN1   | R |
| 1478 | CSTF2  | 57562  | KIAA1377 | S |
| 1482 | NKX2-5 | 2626   | GATA4    | L |
| 1482 | NKX2-5 | 6722   | SRF      | L |
| 1482 | NKX2-5 | 6910   | TBX5     | L |
| 1482 | NKX2-5 | 28996  | HIPK2    | L |
| 1482 | NKX2-5 | 204851 | HIPK1    | L |
| 1487 | CTBP1  | 1488   | CTBP2    | L |
| 1487 | CTBP1  | 2004   | ELK3     | L |
| 1487 | CTBP1  | 2122   | EVI1     | L |
| 1487 | CTBP1  | 3064   | HD       | L |
| 1487 | CTBP1  | 3065   | HDAC1    | L |
| 1487 | CTBP1  | 3066   | HDAC2    | L |
| 1487 | CTBP1  | 5925   | RB1      | L |
| 1487 | CTBP1  | 5932   | RBBP8    | L |
| 1487 | CTBP1  | 7050   | TGIF     | L |
| 1487 | CTBP1  | 8204   | NRIP1    | L |
| 1487 | CTBP1  | 8543   | LMO4     | L |
| 1487 | CTBP1  | 9734   | HDAC9    | L |
| 1487 | CTBP1  | 10320  | ZNFN1A1  | L |
| 1487 | CTBP1  | 23414  | ZFPM2    | L |
| 1487 | CTBP1  | 64375  | ZNFN1A4  | L |
| 1488 | CTBP2  | 2275   | FHL3     | L |
| 1488 | CTBP2  | 6935   | TCF8     | L |
| 1488 | CTBP2  | 7005   | TEAD3    | R |
| 1488 | CTBP2  | 7050   | TGIF     | R |
| 1488 | CTBP2  | 8204   | NRIP1    | R |
| 1488 | CTBP2  | 8535   | CBX4     | L |
| 1488 | CTBP2  | 8715   | NOL4     | R |
| 1488 | CTBP2  | 9491   | PSMF1    | R |
| 1488 | CTBP2  | 10742  | RAI2     | R |
| 1488 | CTBP2  | 11279  | KLF8     | L |
| 1488 | CTBP2  | 23414  | ZFPM2    | L |
| 1488 | CTBP2  | 29994  | BAZ2B    | R |
| 1488 | CTBP2  | 55553  | SOX6     | L |
| 1488 | CTBP2  | 57473  | GM632    | L |
| 1488 | CTBP2  | 60528  | ELAC2    | L |
| 1488 | CTBP2  | 64400  | FTS      | R |
| 1489 | CTF1   | 3572   | IL6ST    | L |
| 1489 | CTF1   | 3977   | LIFR     | L |
| 1490 | CTGF   | 2066   | ERBB4    | L |
| 1490 | CTGF   | 4035   | LRP1     | L |
| 1490 | CTGF   | 7040   | TGFB1    | L |
| 1490 | CTGF   | 7042   | TGFB2    | L |
| 1490 | CTGF   | 7043   | TGFB3    | L |
| 1490 | CTGF   | 7422   | VEGF     | L |
| 1493 | CTLA4  | 2534   | FYN      | L |
| 1493 | CTLA4  | 3717   | JAK2     | L |
| 1493 | CTLA4  | 3932   | LCK      | L |
| 1493 | CTLA4  | 4067   | LYN      | L |
| 1493 | CTLA4  | 5295   | PIK3R1   | L |
| 1493 | CTLA4  | 5525   | PPP2R5A  | L |
| 1493 | CTLA4  | 5781   | PTPN11   | L |
| 1493 | CTLA4  | 8907   | AP1M1    | L |
| 1495 | CTNNA1 | 1499   | CTNNB1   | L |
| 1495 | CTNNA1 | 1739   | DLG1     | L |
| 1495 | CTNNA1 | 3728   | JUP      | L |
| 1495 | CTNNA1 | 4301   | MLLT4    | L |
| 1495 | CTNNA1 | 5663   | PSEN1    | L |
| 1495 | CTNNA1 | 6709   | SPTAN1   | L |
| 1495 | CTNNA1 | 7414   | VCL      | L |
| 1495 | CTNNA1 | 9414   | TJP2     | L |
| 1495 | CTNNA1 | 55591  | VEZATIN  | L |
| 1495 | CTNNA1 | 157638 | FAM84B   | L |

|      |        |       |          |   |
|------|--------|-------|----------|---|
| 1499 | CTNNB1 | 1739  | DLG1     | L |
| 1499 | CTNNB1 | 1825  | DSC3     | L |
| 1499 | CTNNB1 | 1855  | DVL1     | L |
| 1499 | CTNNB1 | 1857  | DVL3     | L |
| 1499 | CTNNB1 | 1956  | EGFR     | L |
| 1499 | CTNNB1 | 2064  | ERBB2    | L |
| 1499 | CTNNB1 | 2274  | FHL2     | L |
| 1499 | CTNNB1 | 2494  | NR5A2    | L |
| 1499 | CTNNB1 | 2516  | NR5A1    | L |
| 1499 | CTNNB1 | 2898  | GRIK2    | L |
| 1499 | CTNNB1 | 3551  | IKBKB    | L |
| 1499 | CTNNB1 | 4087  | SMAD2    | L |
| 1499 | CTNNB1 | 4088  | SMAD3    | L |
| 1499 | CTNNB1 | 4089  | SMAD4    | L |
| 1499 | CTNNB1 | 4582  | MUC1     | L |
| 1499 | CTNNB1 | 5175  | PECAM1   | L |
| 1499 | CTNNB1 | 5295  | PIK3R1   | L |
| 1499 | CTNNB1 | 5300  | PIN1     | L |
| 1499 | CTNNB1 | 5310  | PKD1     | L |
| 1499 | CTNNB1 | 5318  | PKP2     | L |
| 1499 | CTNNB1 | 5663  | PSEN1    | L |
| 1499 | CTNNB1 | 5770  | PTPN1    | L |
| 1499 | CTNNB1 | 5784  | PTPN14   | L |
| 1499 | CTNNB1 | 5787  | PTPRB    | L |
| 1499 | CTNNB1 | 5792  | PTPRF    | L |
| 1499 | CTNNB1 | 5795  | PTPRJ    | L |
| 1499 | CTNNB1 | 5796  | PTPRK    | L |
| 1499 | CTNNB1 | 5803  | PTPRZ1   | L |
| 1499 | CTNNB1 | 6597  | SMARCA4  | L |
| 1499 | CTNNB1 | 6907  | TBL1X    | L |
| 1499 | CTNNB1 | 6925  | TCF4     | L |
| 1499 | CTNNB1 | 6927  | TCF1     | L |
| 1499 | CTNNB1 | 6929  | TCF3     | L |
| 1499 | CTNNB1 | 6934  | TCF7L2   | L |
| 1499 | CTNNB1 | 7046  | TGFBR1   | L |
| 1499 | CTNNB1 | 7430  | VIL2     | L |
| 1499 | CTNNB1 | 8239  | USP9X    | L |
| 1499 | CTNNB1 | 8312  | AXIN1    | L |
| 1499 | CTNNB1 | 8313  | AXIN2    | L |
| 1499 | CTNNB1 | 8607  | RUVBL1   | L |
| 1499 | CTNNB1 | 8826  | IQGAP1   | L |
| 1499 | CTNNB1 | 8851  | CDK5R1   | L |
| 1499 | CTNNB1 | 8945  | BTRC     | L |
| 1499 | CTNNB1 | 9223  | MAG1     | L |
| 1499 | CTNNB1 | 9231  | DLG5     | L |
| 1499 | CTNNB1 | 9368  | SLC9A3R1 | L |
| 1499 | CTNNB1 | 9372  | ZFYVE9   | L |
| 1499 | CTNNB1 | 10076 | PTPRU    | L |
| 1499 | CTNNB1 | 10297 | APC2     | L |
| 1499 | CTNNB1 | 10672 | GNA13    | L |
| 1499 | CTNNB1 | 25776 | PGEA1    | L |
| 1499 | CTNNB1 | 25794 | FSCN2    | L |
| 1499 | CTNNB1 | 26108 | PYGO1    | L |
| 1499 | CTNNB1 | 29119 | CTNNA3   | L |
| 1499 | CTNNB1 | 50649 | ARHGEF4  | L |
| 1499 | CTNNB1 | 51176 | LEF1     | L |
| 1499 | CTNNB1 | 55591 | VEZATIN  | L |
| 1499 | CTNNB1 | 56998 | CTNNBIP1 | L |
| 1499 | CTNNB1 | 83439 | TCF7L1   | L |
| 1500 | CTNND1 | 2017  | CTTN     | L |
| 1500 | CTNND1 | 2241  | FER      | L |
| 1500 | CTNND1 | 2898  | GRIK2    | L |
| 1500 | CTNND1 | 4582  | MUC1     | L |
| 1500 | CTNND1 | 5777  | PTPN6    | L |
| 1500 | CTNND1 | 5795  | PTPRJ    | L |
| 1500 | CTNND1 | 5797  | PTPRM    | L |
| 1500 | CTNND1 | 10009 | ZBTB33   | L |

|      |         |       |           |   |
|------|---------|-------|-----------|---|
| 1500 | CTNND1  | 55914 | ERBB2IP   | L |
| 1501 | CTNND2  | 2017  | CTTN      | L |
| 1501 | CTNND2  | 2534  | FYN       | L |
| 1501 | CTNND2  | 3932  | LCK       | L |
| 1501 | CTNND2  | 5663  | PSEN1     | L |
| 1501 | CTNND2  | 5664  | PSEN2     | L |
| 1501 | CTNND2  | 23037 | PDZK3     | L |
| 1501 | CTNND2  | 55914 | ERBB2IP   | L |
| 1501 | CTNND2  | 57554 | LRRC7     | L |
| 1504 | CTRB1   | 5265  | SERPINA1  | L |
| 1504 | CTRB1   | 5345  | SERPINF2  | L |
| 1508 | CTSB    | 4082  | MARCKS    | L |
| 1508 | CTSB    | 5275  | SERPINB13 | L |
| 1508 | CTSB    | 5997  | RGS2      | S |
| 1508 | CTSB    | 6281  | S100A10   | L |
| 1508 | CTSB    | 7917  | BAT3      | S |
| 1508 | CTSB    | 8530  | CST7      | L |
| 1509 | CTSD    | 2335  | FN1       | L |
| 1509 | CTSD    | 5660  | PSAP      | L |
| 1510 | CTSE    | 7917  | BAT3      | S |
| 1510 | CTSE    | 10436 | C2F       | S |
| 1511 | CTSG    | 2151  | F2RL2     | L |
| 1511 | CTSG    | 2153  | F5        | L |
| 1511 | CTSG    | 2811  | GP1BA     | L |
| 1511 | CTSG    | 3827  | KNG1      | L |
| 1511 | CTSG    | 4035  | LRP1      | L |
| 1511 | CTSG    | 5275  | SERPINB13 | L |
| 1511 | CTSG    | 5473  | PPBP      | L |
| 1511 | CTSG    | 6382  | SDC1      | L |
| 1511 | CTSG    | 7057  | THBS1     | L |
| 1513 | CTSK    | 2261  | FGFR3     | S |
| 1513 | CTSK    | 5275  | SERPINB13 | L |
| 1513 | CTSK    | 6317  | SERPINB3  | L |
| 1514 | CTSL    | 3827  | KNG1      | L |
| 1514 | CTSL    | 5275  | SERPINB13 | L |
| 1514 | CTSL    | 6256  | RXRA      | L |
| 1514 | CTSL    | 6317  | SERPINB3  | L |
| 1514 | CTSL    | 8530  | CST7      | L |
| 1514 | CTSL    | 80781 | COL18A1   | L |
| 1520 | CTSS    | 3827  | KNG1      | L |
| 1520 | CTSS    | 5335  | PLCG1     | L |
| 1520 | CTSS    | 6317  | SERPINB3  | L |
| 1520 | CTSS    | 6318  | SERPINB4  | L |
| 1523 | CUTL1   | 5925  | RB1       | L |
| 1523 | CUTL1   | 6304  | SATB1     | L |
| 1523 | CUTL1   | 8850  | PCAF      | L |
| 1523 | CUTL1   | 9400  | RECQL5    | S |
| 1523 | CUTL1   | 9672  | SDC3      | L |
| 1523 | CUTL1   | 60528 | ELAC2     | S |
| 1524 | CX3CR1  | 6376  | CX3CL1    | L |
| 1525 | CXADR   | 2130  | EWSR1     | R |
| 1527 | CXorf2  | 2059  | EPS8      | R |
| 1528 | CYB5    | 1543  | CYP1A1    | L |
| 1528 | CYB5    | 1727  | CYB5R3    | L |
| 1528 | CYB5    | 6319  | SCD       | L |
| 1528 | CYB5    | 54205 | CYCS      | L |
| 1535 | CYBA    | 1536  | CYBB      | L |
| 1535 | CYBA    | 4687  | NCF1      | L |
| 1535 | CYBA    | 4688  | NCF2      | L |
| 1535 | CYBA    | 5879  | RAC1      | L |
| 1536 | CYBB    | 4688  | NCF2      | L |
| 1537 | CYC1    | 7386  | UQCRRS1   | L |
| 1537 | CYC1    | 54205 | CYCS      | L |
| 1544 | CYP1A2  | 5447  | POR       | L |
| 1557 | CYP2C19 | 5447  | POR       | L |
| 1559 | CYP2C9  | 5447  | POR       | L |
| 1583 | CYP11A1 | 1585  | CYP11B2   | L |

|      |         |        |           |   |
|------|---------|--------|-----------|---|
| 1583 | CYP11A1 | 2230   | FDX1      | L |
| 1583 | CYP11A1 | 4087   | SMAD2     | L |
| 1583 | CYP11A1 | 4088   | SMAD3     | L |
| 1583 | CYP11A1 | 4093   | SMAD9     | L |
| 1584 | CYP11B1 | 1585   | CYP11B2   | L |
| 1585 | CYP11B2 | 2230   | FDX1      | L |
| 1586 | CYP17A1 | 5447   | POR       | L |
| 1588 | CYP19A1 | 2189   | FANCG     | L |
| 1600 | DAB1    | 3949   | LDLR      | L |
| 1600 | DAB1    | 4035   | LRP1      | L |
| 1600 | DAB1    | 4036   | LRP2      | L |
| 1600 | DAB1    | 5048   | PAFAH1B1  | L |
| 1600 | DAB1    | 6477   | SIAH1     | L |
| 1600 | DAB1    | 7436   | VLDLR     | L |
| 1600 | DAB1    | 7804   | LRP8      | L |
| 1600 | DAB1    | 153090 | DAB2IP    | L |
| 1601 | DAB2    | 1857   | DVL3      | L |
| 1601 | DAB2    | 2268   | FGR       | L |
| 1601 | DAB2    | 2885   | GRB2      | L |
| 1601 | DAB2    | 4036   | LRP2      | L |
| 1601 | DAB2    | 4087   | SMAD2     | L |
| 1601 | DAB2    | 4088   | SMAD3     | L |
| 1601 | DAB2    | 4646   | MYO6      | L |
| 1601 | DAB2    | 5300   | PIN1      | L |
| 1601 | DAB2    | 6714   | SRC       | L |
| 1601 | DAB2    | 7046   | TGFBR1    | L |
| 1601 | DAB2    | 7048   | TGFBR2    | L |
| 1601 | DAB2    | 23181  | C21orf106 | L |
| 1601 | DAB2    | 57534  | MIB1      | L |
| 1601 | DAB2    | 64750  | SMURF2    | L |
| 1602 | DACH1   | 7329   | UBE2I     | R |
| 1602 | DACH1   | 55577  | NAGK      | R |
| 1604 | DAF     | 2534   | FYN       | L |
| 1604 | DAF     | 2822   | GPLD1     | L |
| 1604 | DAF     | 3932   | LCK       | L |
| 1605 | DAG1    | 1756   | DMD       | L |
| 1605 | DAG1    | 2885   | GRB2      | L |
| 1605 | DAG1    | 3908   | LAMA2     | L |
| 1605 | DAG1    | 3911   | LAMA5     | L |
| 1605 | DAG1    | 5913   | RAPSN     | L |
| 1605 | DAG1    | 6464   | SHC1      | L |
| 1605 | DAG1    | 7402   | UTRN      | L |
| 1605 | DAG1    | 9215   | LARGE     | L |
| 1606 | DGKA    | 59067  | IL21      | L |
| 1611 | DAP     | 1742   | DLG4      | L |
| 1611 | DAP     | 7132   | TNFRSF1A  | L |
| 1611 | DAP     | 9869   | SETDB1    | S |
| 1612 | DAPK1   | 7132   | TNFRSF1A  | L |
| 1612 | DAPK1   | 7529   | YWHAB     | L |
| 1612 | DAPK1   | 8717   | TRADD     | L |
| 1612 | DAPK1   | 8772   | FADD      | L |
| 1612 | DAPK1   | 57534  | MIB1      | L |
| 1613 | DAPK3   | 1616   | DAXX      | L |
| 1613 | DAPK3   | 5590   | PRKCZ     | L |
| 1613 | DAPK3   | 9002   | F2RL3     | L |
| 1615 | DARS    | 1915   | EEF1A1    | L |
| 1615 | DARS    | 3320   | HSPCA     | L |
| 1615 | DARS    | 7965   | JTV1      | R |
| 1616 | DAXX    | 2113   | ETS1      | L |
| 1616 | DAXX    | 3065   | HDAC1     | L |
| 1616 | DAXX    | 3315   | HSPB1     | L |
| 1616 | DAXX    | 4217   | MAP3K5    | L |
| 1616 | DAXX    | 4599   | MX1       | L |
| 1616 | DAXX    | 5077   | PAX3      | L |
| 1616 | DAXX    | 5079   | PAX5      | L |
| 1616 | DAXX    | 5371   | PML       | L |
| 1616 | DAXX    | 6517   | SLC2A4    | L |



|      |       |        |          |   |
|------|-------|--------|----------|---|
| 1616 | DAXX  | 7040   | TGFB1    | L |
| 1616 | DAXX  | 7048   | TGFBR2   | L |
| 1616 | DAXX  | 7157   | TP53     | L |
| 1616 | DAXX  | 7329   | UBE2I    | L |
| 1616 | DAXX  | 7341   | SUMO1    | L |
| 1616 | DAXX  | 8837   | CFLAR    | L |
| 1616 | DAXX  | 10445  | MCRS1    | L |
| 1616 | DAXX  | 28996  | HIPK2    | L |
| 1616 | DAXX  | 204851 | HIPK1    | L |
| 1618 | DAZL  | 9802   | DAZAP2   | L |
| 1618 | DAZL  | 23369  | PUM2     | L |
| 1618 | DAZL  | 26528  | DAZAP1   | L |
| 1620 | DBC1  | 10924  | SMPDL3A  | L |
| 1622 | DBI   | 60490  | PPCDC    | S |
| 1627 | DBN1  | 9455   | HOMER2   | L |
| 1627 | DBN1  | 20924  | (null)   | S |
| 1627 | DBN1  | 23268  | DNMBP    | L |
| 1627 | DBN1  | 25836  | NIPBL    | S |
| 1628 | DBP   | 1649   | DDIT3    | L |
| 1628 | DBP   | 3131   | HLF      | L |
| 1628 | DBP   | 3725   | JUN      | L |
| 1628 | DBP   | 7008   | TEF      | L |
| 1628 | DBP   | 10538  | BATF     | L |
| 1628 | DBP   | 55509  | SNFT     | L |
| 1629 | DBT   | 5829   | PXN      | L |
| 1630 | DCC   | 4150   | MAZ      | L |
| 1630 | DCC   | 4690   | NCK1     | L |
| 1630 | DCC   | 5595   | MAPK3    | L |
| 1630 | DCC   | 6477   | SIAH1    | L |
| 1630 | DCC   | 6478   | SIAH2    | L |
| 1630 | DCC   | 9423   | NTN1     | L |
| 1630 | DCC   | 26060  | APPL     | L |
| 1633 | DCK   | 11269  | DDX19B   | S |
| 1633 | DCK   | 51280  | GOLPH2   | S |
| 1633 | DCK   | 219541 | MED19    | S |
| 1634 | DCN   | 1956   | EGFR     | L |
| 1634 | DCN   | 2006   | ELN      | L |
| 1634 | DCN   | 2200   | FBN1     | L |
| 1634 | DCN   | 2316   | FLNA     | L |
| 1634 | DCN   | 2335   | FN1      | L |
| 1634 | DCN   | 5320   | PLA2G2A  | L |
| 1634 | DCN   | 6441   | SFTPD    | L |
| 1634 | DCN   | 7040   | TGFB1    | L |
| 1634 | DCN   | 7057   | THBS1    | L |
| 1634 | DCN   | 7124   | TNF      | L |
| 1634 | DCN   | 7373   | COL14A1  | L |
| 1635 | DCTD  | 60491  | NIF3L1   | R |
| 1635 | DCTD  | 79873  | NUDT18   | R |
| 1635 | DCTD  | 79959  | C18orf9  | R |
| 1635 | DCTD  | 84708  | LNX      | R |
| 1638 | DCT   | 7414   | VCL      | L |
| 1639 | DCTN1 | 1780   | DNCI1    | L |
| 1639 | DCTN1 | 1781   | DNCI2    | L |
| 1639 | DCTN1 | 2885   | GRB2     | L |
| 1639 | DCTN1 | 3064   | HD       | L |
| 1639 | DCTN1 | 3832   | KIF11    | L |
| 1639 | DCTN1 | 5048   | PAFAH1B1 | L |
| 1639 | DCTN1 | 5223   | PGAM1    | S |
| 1639 | DCTN1 | 6249   | RSN      | L |
| 1639 | DCTN1 | 7431   | VIM      | L |
| 1639 | DCTN1 | 23299  | BICD2    | L |
| 1639 | DCTN1 | 57473  | GM632    | L |
| 1641 | DCX   | 5048   | PAFAH1B1 | L |
| 1642 | DDB1  | 1643   | DDB2     | L |
| 1642 | DDB1  | 8543   | LMO4     | L |
| 1642 | DDB1  | 9341   | VAMP3    | S |
| 1643 | DDB2  | 3065   | HDAC1    | L |

|      |         |        |            |    |
|------|---------|--------|------------|----|
| 1647 | GADD45A | 2512   | FTL        | S  |
| 1647 | GADD45A | 4216   | MAP3K4     | L  |
| 1647 | GADD45A | 4616   | GADD45B    | L  |
| 1647 | GADD45A | 5111   | PCNA       | L  |
| 1647 | GADD45A | 5465   | PPARA      | L  |
| 1647 | GADD45A | 6256   | RXRA       | L  |
| 1647 | GADD45A | 10540  | DCTN2      | R  |
| 1647 | GADD45A | 10912  | GADD45G    | L  |
| 1647 | GADD45A | 90480  | GADD45GIP1 | L  |
| 1649 | DDIT3   | 2353   | FOS        | L  |
| 1649 | DDIT3   | 2354   | FOSB       | L  |
| 1649 | DDIT3   | 2355   | FOSL2      | L  |
| 1649 | DDIT3   | 3131   | HLF        | L  |
| 1649 | DDIT3   | 3725   | JUN        | L  |
| 1649 | DDIT3   | 3727   | JUND       | L  |
| 1649 | DDIT3   | 4097   | MAFG       | L  |
| 1649 | DDIT3   | 4783   | NFIL3      | L  |
| 1649 | DDIT3   | 6189   | RPS3A      | L  |
| 1649 | DDIT3   | 7008   | TEF        | L  |
| 1649 | DDIT3   | 7975   | MAFK       | L  |
| 1649 | DDIT3   | 8061   | FOSL1      | L  |
| 1649 | DDIT3   | 8301   | PICALM     | L  |
| 1649 | DDIT3   | 8405   | SPOP       | R  |
| 1649 | DDIT3   | 9586   | CREB5      | L  |
| 1649 | DDIT3   | 10488  | CREB3      | L  |
| 1649 | DDIT3   | 10538  | BATF       | RL |
| 1649 | DDIT3   | 11016  | ATF7       | L  |
| 1649 | DDIT3   | 51171  | DHRS10     | R  |
| 1649 | DDIT3   | 55509  | SNFT       | L  |
| 1649 | DDIT3   | 79892  | C10orf119  | R  |
| 1653 | DDX1    | 3190   | HNRPK      | L  |
| 1653 | DDX1    | 5829   | PXN        | L  |
| 1653 | DDX1    | 7414   | VCL        | L  |
| 1654 | DDX3X   | 7414   | VCL        | L  |
| 1654 | DDX3X   | 57473  | GM632      | L  |
| 1655 | DDX5    | 2091   | FBL        | L  |
| 1655 | DDX5    | 10270  | AKAP8      | L  |
| 1655 | DDX5    | 10521  | DDX17      | L  |
| 1656 | DDX6    | 11338  | U2AF2      | L  |
| 1660 | DHX9    | 3276   | HRMT1L2    | L  |
| 1660 | DHX9    | 6606   | SMN1       | L  |
| 1660 | DHX9    | 7153   | TOP2A      | L  |
| 1660 | DHX9    | 10482  | NXF1       | L  |
| 1660 | DHX9    | 10657  | KHDRBS1    | L  |
| 1660 | DHX9    | 26993  | AKAP8L     | L  |
| 1663 | DDX11   | 5217   | PFN2       | S  |
| 1663 | DDX11   | 11143  | MYST2      | S  |
| 1667 | DEFA1   | 5201   | PFDN1      | S  |
| 1667 | DEFA1   | 5345   | SERPINF2   | L  |
| 1674 | DES     | 1832   | DSP        | L  |
| 1674 | DES     | 6271   | S100A1     | L  |
| 1674 | DES     | 6285   | S100B      | L  |
| 1674 | DES     | 6709   | SPTAN1     | L  |
| 1674 | DES     | 23336  | DMN        | L  |
| 1675 | DF      | 5345   | SERPINF2   | L  |
| 1675 | DF      | 307255 | (null)     | S  |
| 1676 | DFFA    | 1677   | DFFB       | L  |
| 1676 | DFFA    | 2130   | EWSR1      | R  |
| 1676 | DFFA    | 29888  | STRN4      | S  |
| 1676 | DFFA    | 54550  | EFCBP2     | R  |
| 1677 | DFFB    | 7153   | TOP2A      | L  |
| 1678 | TIMM8A  | 8027   | STAM       | L  |
| 1687 | DFNA5   | 5764   | PTN        | S  |
| 1719 | DHFR    | 2280   | FKBP1A     | L  |
| 1719 | DHFR    | 3329   | HSPD1      | L  |
| 1719 | DHFR    | 7057   | THBS1      | L  |
| 1719 | DHFR    | 9804   | TOMM20     | L  |

|      |        |        |          |   |
|------|--------|--------|----------|---|
| 1725 | DHPS   | 1984   | EIF5A    | L |
| 1725 | DHPS   | 6133   | RPL9     | R |
| 1725 | DHPS   | 56648  | EIF5A2   | R |
| 1725 | DHPS   | 60491  | NIF3L1   | R |
| 1725 | DHPS   | 79873  | NUDT18   | R |
| 1727 | CYB5R3 | 54205  | CYCS     | L |
| 1728 | NQO1   | 3303   | HSPA1A   | L |
| 1729 | DIAPH1 | 5311   | PKD2     | L |
| 1729 | DIAPH1 | 5879   | RAC1     | L |
| 1729 | DIAPH1 | 8317   | CDC7     | L |
| 1729 | DIAPH1 | 10458  | BAIAP2   | L |
| 1729 | DIAPH1 | 23214  | XPO6     | L |
| 1729 | DIAPH1 | 55660  | FNBP3    | L |
| 1730 | DIAPH2 | 29984  | RHOD     | L |
| 1731 | SEPT1  | 23157  | SEPT6    | R |
| 1731 | SEPT1  | 54472  | TOLLIP   | R |
| 1734 | DIO2   | 10868  | USP20    | L |
| 1734 | DIO2   | 23032  | USP33    | L |
| 1736 | DKC1   | 1937   | EEF1G    | S |
| 1736 | DKC1   | 6745   | SSR1     | S |
| 1736 | DKC1   | 8665   | EIF3S5   | S |
| 1736 | DKC1   | 11313  | LYPLA2   | S |
| 1737 | DLAT   | 1738   | DLD      | L |
| 1737 | DLAT   | 5160   | PDHA1    | L |
| 1737 | DLAT   | 5162   | PDHB     | L |
| 1737 | DLAT   | 5163   | PDK1     | L |
| 1737 | DLAT   | 5164   | PDK2     | L |
| 1737 | DLAT   | 5165   | PDK3     | L |
| 1737 | DLAT   | 5166   | PDK4     | L |
| 1737 | DLAT   | 8050   | PDHX     | L |
| 1738 | DLD    | 4967   | OGDH     | L |
| 1739 | DLG1   | 1740   | DLG2     | L |
| 1739 | DLG1   | 1741   | DLG3     | L |
| 1739 | DLG1   | 2035   | EPB41    | L |
| 1739 | DLG1   | 2066   | ERBB4    | L |
| 1739 | DLG1   | 2890   | GRIA1    | L |
| 1739 | DLG1   | 2898   | GRIK2    | L |
| 1739 | DLG1   | 2903   | GRIN2A   | L |
| 1739 | DLG1   | 2977   | GUCY1A2  | L |
| 1739 | DLG1   | 3739   | KCNA4    | L |
| 1739 | DLG1   | 3759   | KCNJ2    | L |
| 1739 | DLG1   | 3766   | KCNJ10   | L |
| 1739 | DLG1   | 3768   | KCNJ12   | L |
| 1739 | DLG1   | 3932   | LCK      | L |
| 1739 | DLG1   | 4036   | LRP2     | L |
| 1739 | DLG1   | 4130   | MAP1A    | L |
| 1739 | DLG1   | 4646   | MYO6     | L |
| 1739 | DLG1   | 5728   | PTEN     | L |
| 1739 | DLG1   | 6868   | ADAM17   | L |
| 1739 | DLG1   | 7430   | VIL2     | L |
| 1739 | DLG1   | 7881   | KCNAB1   | L |
| 1739 | DLG1   | 8573   | CASK     | L |
| 1739 | DLG1   | 9228   | DLGAP2   | L |
| 1739 | DLG1   | 9229   | DLGAP1   | L |
| 1739 | DLG1   | 9419   | CRIP1    | L |
| 1739 | DLG1   | 9495   | AKAP5    | L |
| 1739 | DLG1   | 9615   | GDA      | L |
| 1739 | DLG1   | 23095  | KIF1B    | L |
| 1739 | DLG1   | 23303  | KIF13B   | L |
| 1739 | DLG1   | 54910  | SEMA4C   | L |
| 1739 | DLG1   | 57596  | KIAA1446 | L |
| 1739 | DLG1   | 93643  | TJAP1    | L |
| 1739 | DLG1   | 166647 | GPR125   | L |
| 1740 | DLG2   | 1742   | DLG4     | L |
| 1740 | DLG2   | 2066   | ERBB4    | L |
| 1740 | DLG2   | 2903   | GRIN2A   | L |
| 1740 | DLG2   | 2904   | GRIN2B   | L |

|      |      |       |         |   |
|------|------|-------|---------|---|
| 1740 | DLG2 | 2977  | GUCY1A2 | L |
| 1740 | DLG2 | 3739  | KCNA4   | L |
| 1740 | DLG2 | 3761  | KCNJ4   | L |
| 1740 | DLG2 | 3768  | KCNJ12  | L |
| 1740 | DLG2 | 4036  | LRP2    | L |
| 1740 | DLG2 | 4130  | MAP1A   | L |
| 1740 | DLG2 | 4842  | NOS1    | L |
| 1740 | DLG2 | 8825  | LIN7A   | L |
| 1740 | DLG2 | 9419  | CRIPT   | L |
| 1740 | DLG2 | 54413 | NLGN3   | L |
| 1741 | DLG3 | 1742  | DLG4    | L |
| 1741 | DLG3 | 2066  | ERBB4   | L |
| 1741 | DLG3 | 2185  | PTK2B   | L |
| 1741 | DLG3 | 2898  | GRIK2   | L |
| 1741 | DLG3 | 2903  | GRIN2A  | L |
| 1741 | DLG3 | 2904  | GRIN2B  | L |
| 1741 | DLG3 | 2905  | GRIN2C  | L |
| 1741 | DLG3 | 2977  | GUCY1A2 | L |
| 1741 | DLG3 | 3768  | KCNJ12  | L |
| 1741 | DLG3 | 4036  | LRP2    | L |
| 1741 | DLG3 | 8825  | LIN7A   | L |
| 1741 | DLG3 | 9419  | CRIPT   | L |
| 1741 | DLG3 | 9615  | GDA     | L |
| 1741 | DLG3 | 54413 | NLGN3   | L |
| 1741 | DLG3 | 54910 | SEMA4C  | L |
| 1742 | DLG4 | 2064  | ERBB2   | L |
| 1742 | DLG4 | 2066  | ERBB4   | L |
| 1742 | DLG4 | 2185  | PTK2B   | L |
| 1742 | DLG4 | 2534  | FYN     | L |
| 1742 | DLG4 | 2897  | GRIK1   | L |
| 1742 | DLG4 | 2898  | GRIK2   | L |
| 1742 | DLG4 | 2901  | GRIK5   | L |
| 1742 | DLG4 | 2903  | GRIN2A  | L |
| 1742 | DLG4 | 2904  | GRIN2B  | L |
| 1742 | DLG4 | 2905  | GRIN2C  | L |
| 1742 | DLG4 | 2906  | GRIN2D  | L |
| 1742 | DLG4 | 2977  | GUCY1A2 | L |
| 1742 | DLG4 | 3064  | HD      | L |
| 1742 | DLG4 | 3356  | HTR2A   | L |
| 1742 | DLG4 | 3358  | HTR2C   | L |
| 1742 | DLG4 | 3737  | KCNA2   | L |
| 1742 | DLG4 | 3739  | KCNA4   | L |
| 1742 | DLG4 | 3759  | KCNJ2   | L |
| 1742 | DLG4 | 3766  | KCNJ10  | L |
| 1742 | DLG4 | 3768  | KCNJ12  | L |
| 1742 | DLG4 | 4035  | LRP1    | L |
| 1742 | DLG4 | 4036  | LRP2    | L |
| 1742 | DLG4 | 4067  | LYN     | L |
| 1742 | DLG4 | 4130  | MAP1A   | L |
| 1742 | DLG4 | 4179  | MCP     | L |
| 1742 | DLG4 | 4294  | MAP3K10 | L |
| 1742 | DLG4 | 4842  | NOS1    | L |
| 1742 | DLG4 | 5578  | PRKCA   | L |
| 1742 | DLG4 | 5793  | PTPRG   | L |
| 1742 | DLG4 | 7525  | YES1    | L |
| 1742 | DLG4 | 8321  | FZD1    | L |
| 1742 | DLG4 | 8322  | FZD4    | L |
| 1742 | DLG4 | 8573  | CASK    | L |
| 1742 | DLG4 | 8655  | DNCL1   | L |
| 1742 | DLG4 | 8825  | LIN7A   | L |
| 1742 | DLG4 | 9146  | HGS     | L |
| 1742 | DLG4 | 9228  | DLGAP2  | L |
| 1742 | DLG4 | 9229  | DLGAP1  | L |
| 1742 | DLG4 | 9311  | ACCN3   | L |
| 1742 | DLG4 | 9419  | CRIPT   | L |
| 1742 | DLG4 | 9495  | AKAP5   | L |
| 1742 | DLG4 | 9615  | GDA     | L |

|      |       |        |          |   |
|------|-------|--------|----------|---|
| 1742 | DLG4  | 10369  | CACNG2   | L |
| 1742 | DLG4  | 10505  | SEMA4F   | L |
| 1742 | DLG4  | 22941  | SHANK2   | L |
| 1742 | DLG4  | 23095  | KIF1B    | L |
| 1742 | DLG4  | 23303  | KIF13B   | L |
| 1742 | DLG4  | 50944  | SHANK1   | L |
| 1742 | DLG4  | 54413  | NLGN3    | L |
| 1742 | DLG4  | 54910  | SEMA4C   | L |
| 1742 | DLG4  | 55227  | LRRC1    | L |
| 1742 | DLG4  | 55914  | ERBB2IP  | L |
| 1742 | DLG4  | 57502  | NLGN4X   | L |
| 1742 | DLG4  | 57596  | KIAA1446 | L |
| 1742 | DLG4  | 140735 | Dic2     | L |
| 1743 | DLST  | 2314   | FLII     | S |
| 1743 | DLST  | 4673   | NAP1L1   | S |
| 1743 | DLST  | 4967   | OGDH     | L |
| 1743 | DLST  | 5217   | PFN2     | S |
| 1743 | DLST  | 7372   | UMPS     | S |
| 1743 | DLST  | 7704   | ZBTB16   | S |
| 1743 | DLST  | 9231   | DLG5     | S |
| 1743 | DLST  | 9853   | RUSC2    | S |
| 1743 | DLST  | 10298  | PAK4     | S |
| 1743 | DLST  | 10383  | TUBB2    | S |
| 1743 | DLST  | 10425  | ARIH2    | S |
| 1743 | DLST  | 11244  | ZHX1     | S |
| 1743 | DLST  | 23256  | SCFD1    | S |
| 1743 | DLST  | 79080  | MGC2574  | S |
| 1745 | DLX1  | 4089   | SMAD4    | L |
| 1746 | DLX2  | 4488   | MSX2     | L |
| 1748 | DLX4  | 9500   | MAGED1   | L |
| 1749 | DLX5  | 4488   | MSX2     | L |
| 1749 | DLX5  | 9500   | MAGED1   | L |
| 1749 | DLX5  | 23013  | SPEN     | L |
| 1755 | DMBT1 | 6435   | SFTPA1   | L |
| 1755 | DMBT1 | 6441   | SFTPD    | L |
| 1756 | DMD   | 1837   | DTNA     | L |
| 1756 | DMD   | 3768   | KCNJ12   | L |
| 1756 | DMD   | 5239   | PGM5     | L |
| 1756 | DMD   | 6640   | SNTA1    | L |
| 1756 | DMD   | 6641   | SNTB1    | L |
| 1756 | DMD   | 8525   | DGKZ     | L |
| 1759 | DNM1  | 2017   | CTTN     | L |
| 1759 | DNM1  | 2060   | EPS15    | L |
| 1759 | DNM1  | 2885   | GRB2     | L |
| 1759 | DNM1  | 4690   | NCK1     | L |
| 1759 | DNM1  | 5217   | PFN2     | L |
| 1759 | DNM1  | 5303   | PIN4     | S |
| 1759 | DNM1  | 6453   | ITSN1    | L |
| 1759 | DNM1  | 6455   | SH3GL1   | L |
| 1759 | DNM1  | 6456   | SH3GL2   | L |
| 1759 | DNM1  | 9022   | CLIC3    | L |
| 1759 | DNM1  | 10399  | GNB2L1   | L |
| 1759 | DNM1  | 23048  | FNBP1    | L |
| 1759 | DNM1  | 23268  | DNMBP    | L |
| 1759 | DNM1  | 23523  | CABIN1   | L |
| 1759 | DNM1  | 29763  | PACSIN3  | L |
| 1759 | DNM1  | 29993  | PACSIN1  | L |
| 1759 | DNM1  | 51003  | MED31    | S |
| 1759 | DNM1  | 57562  | KIAA1377 | S |
| 1759 | DNM1  | 79754  | ASB13    | S |
| 1759 | DNM1  | 92609  | TIMM50   | S |
| 1760 | DMPK  | 3316   | HSPB2    | L |
| 1760 | DMPK  | 4659   | PPP1R12A | L |
| 1760 | DMPK  | 5894   | RAF1     | L |
| 1760 | DMPK  | 11337  | GABARAP  | S |
| 1762 | DMWD  | 5473   | PPBP     | S |
| 1778 | DNCH1 | 4087   | SMAD2    | L |

|      |        |        |               |   |
|------|--------|--------|---------------|---|
| 1778 | DNCH1  | 8655   | DNCL1         | L |
| 1778 | DNCH1  | 55603  | FAM46A        | L |
| 1780 | DNCH1  | 83658  | DNCL2A        | R |
| 1780 | DNCH1  | 140735 | Dic2          | R |
| 1781 | DNCH2  | 6990   | TCTE1L        | R |
| 1783 | DNCL2  | 2039   | EPB49         | S |
| 1785 | DNM2   | 2017   | CTTN          | L |
| 1785 | DNM2   | 2060   | EPS15         | L |
| 1785 | DNM2   | 5216   | PFN1          | L |
| 1785 | DNM2   | 5479   | PPIB          | S |
| 1785 | DNM2   | 7919   | BAT1          | S |
| 1785 | DNM2   | 8655   | DNCL1         | L |
| 1785 | DNM2   | 10200  | MPHOSPH6      | L |
| 1785 | DNM2   | 22941  | SHANK2        | L |
| 1785 | DNM2   | 23578  | (null)        | S |
| 1785 | DNM2   | 50944  | SHANK1        | L |
| 1785 | DNM2   | 51386  | EIF3S6IP      | S |
| 1785 | DNM2   | 51678  | MPP6          | L |
| 1785 | DNM2   | 54469  | ZA20D3        | S |
| 1785 | DNM2   | 55729  | ATF7IP        | L |
| 1786 | DNMT1  | 1788   | DNMT3A        | L |
| 1786 | DNMT1  | 1789   | DNMT3B        | L |
| 1786 | DNMT1  | 3066   | HDAC2         | L |
| 1786 | DNMT1  | 5111   | PCNA          | L |
| 1786 | DNMT1  | 5925   | RB1           | L |
| 1786 | DNMT1  | 5987   | RFP           | S |
| 1786 | DNMT1  | 7251   | TSG101        | L |
| 1786 | DNMT1  | 8655   | DNCL1         | L |
| 1786 | DNMT1  | 8932   | MBD2          | L |
| 1786 | DNMT1  | 10951  | CBX1          | L |
| 1786 | DNMT1  | 53615  | MBD3          | L |
| 1786 | DNMT1  | 55929  | DMAP1         | L |
| 1787 | DNMT2  | 1915   | EEF1A1        | S |
| 1787 | DNMT2  | 6804   | STX1A         | S |
| 1787 | DNMT2  | 9094   | UNC119        | S |
| 1787 | DNMT2  | 9869   | SETDB1        | S |
| 1787 | DNMT2  | 10813  | UTP14A        | S |
| 1787 | DNMT2  | 10980  | COPS6         | S |
| 1787 | DNMT2  | 55791  | C1orf103      | S |
| 1787 | DNMT2  | 57062  | DDX24         | S |
| 1787 | DNMT2  | 84060  | DKFZP564O0523 | S |
| 1788 | DNMT3A | 1789   | DNMT3B        | L |
| 1788 | DNMT3A | 3065   | HDAC1         | L |
| 1788 | DNMT3A | 4609   | MYC           | L |
| 1788 | DNMT3A | 6839   | SUV39H1       | L |
| 1788 | DNMT3A | 7329   | UBE2I         | L |
| 1788 | DNMT3A | 10951  | CBX1          | L |
| 1788 | DNMT3A | 29947  | DNMT3L        | L |
| 1789 | DNMT3B | 3065   | HDAC1         | L |
| 1789 | DNMT3B | 7329   | UBE2I         | L |
| 1789 | DNMT3B | 7341   | SUMO1         | L |
| 1789 | DNMT3B | 10951  | CBX1          | L |
| 1789 | DNMT3B | 23468  | CBX5          | L |
| 1789 | DNMT3B | 29947  | DNMT3L        | L |
| 1791 | DNTT   | 2547   | XRCC6         | L |
| 1791 | DNTT   | 30836  | ERBP          | L |
| 1793 | DOCK1  | 5879   | RAC1          | L |
| 1793 | DOCK1  | 8440   | NCK2          | L |
| 1793 | DOCK1  | 10163  | WASF2         | L |
| 1793 | DOCK1  | 23210  | PTDSR         | L |
| 1794 | DOCK2  | 5879   | RAC1          | L |
| 1794 | DOCK2  | 5880   | RAC2          | L |
| 1794 | DOCK2  | 7409   | VAV1          | L |
| 1795 | DOCK3  | 5663   | PSEN1         | L |
| 1795 | DOCK3  | 5664   | PSEN2         | L |
| 1796 | DOK1   | 3815   | KIT           | L |
| 1796 | DOK1   | 4068   | SH2D1A        | L |

|      |         |       |          |   |
|------|---------|-------|----------|---|
| 1796 | DOK1    | 4690  | NCK1     | L |
| 1796 | DOK1    | 5777  | PTPN6    | L |
| 1796 | DOK1    | 5794  | PTPRH    | L |
| 1796 | DOK1    | 5921  | RASA1    | L |
| 1796 | DOK1    | 5979  | RET      | L |
| 1796 | DOK1    | 8440  | NCK2     | L |
| 1796 | DOK1    | 9448  | MAP4K4   | L |
| 1797 | DOM3Z   | 2319  | FLOT2    | L |
| 1797 | DOM3Z   | 5394  | EXOSC10  | L |
| 1797 | DOM3Z   | 5976  | RENT1    | L |
| 1797 | DOM3Z   | 22803 | XRN2     | L |
| 1797 | DOM3Z   | 23016 | EXOSC7   | L |
| 1797 | DOM3Z   | 54464 | XRN1     | L |
| 1797 | DOM3Z   | 54512 | EXOSC4   | L |
| 1800 | DPEP1   | 26128 | KIAA1279 | R |
| 1801 | DPH1    | 3309  | HSPA5    | L |
| 1801 | DPH1    | 9939  | RBM8A    | L |
| 1803 | DPP4    | 2922  | GRP      | L |
| 1803 | DPP4    | 27151 | CPAMD8   | L |
| 1805 | DPT     | 4015  | LOX      | L |
| 1805 | DPT     | 7917  | BAT3     | S |
| 1807 | DPYS    | 56896 | DPYSL5   | L |
| 1808 | DPYSL2  | 6093  | ROCK1    | L |
| 1808 | DPYSL2  | 8650  | NUMB     | L |
| 1808 | DPYSL2  | 56896 | DPYSL5   | L |
| 1809 | DPYSL3  | 56896 | DPYSL5   | L |
| 1810 | DR1     | 4783  | NFIL3    | L |
| 1810 | DR1     | 6908  | TBP      | L |
| 1810 | DR1     | 10589 | DRAP1    | L |
| 1810 | DR1     | 54107 | POLE3    | R |
| 1811 | SLC26A3 | 9368  | SLC9A3R1 | L |
| 1812 | DRD1    | 2037  | EPB41L2  | L |
| 1812 | DRD1    | 2316  | FLNA     | L |
| 1812 | DRD1    | 22820 | COPG     | L |
| 1812 | DRD1    | 26958 | COPG2    | L |
| 1812 | DRD1    | 50632 | DRD1IP   | L |
| 1813 | DRD2    | 2035  | EPB41    | L |
| 1813 | DRD2    | 2036  | EPB41L1  | L |
| 1813 | DRD2    | 2316  | FLNA     | L |
| 1813 | DRD2    | 2771  | GNAI2    | L |
| 1813 | DRD2    | 2773  | GNAI3    | L |
| 1813 | DRD2    | 2781  | GNAZ     | L |
| 1813 | DRD2    | 3763  | KCNJ6    | L |
| 1813 | DRD2    | 3765  | KCNJ9    | L |
| 1813 | DRD2    | 6755  | SSTR5    | L |
| 1813 | DRD2    | 23413 | FREQ     | L |
| 1813 | DRD2    | 54102 | CLIC6    | L |
| 1813 | DRD2    | 84687 | PPP1R9B  | L |
| 1814 | DRD3    | 2035  | EPB41    | L |
| 1814 | DRD3    | 2036  | EPB41L1  | L |
| 1814 | DRD3    | 2037  | EPB41L2  | L |
| 1814 | DRD3    | 2316  | FLNA     | L |
| 1814 | DRD3    | 2770  | GNAI1    | L |
| 1814 | DRD3    | 2885  | GRB2     | L |
| 1814 | DRD3    | 4690  | NCK1     | L |
| 1814 | DRD3    | 8777  | MPDZ     | L |
| 1814 | DRD3    | 23413 | FREQ     | L |
| 1814 | DRD3    | 54102 | CLIC6    | L |
| 1815 | DRD4    | 2554  | GABRA1   | L |
| 1815 | DRD4    | 2885  | GRB2     | L |
| 1815 | DRD4    | 3765  | KCNJ9    | L |
| 1815 | DRD4    | 4690  | NCK1     | L |
| 1815 | DRD4    | 6714  | SRC      | L |
| 1815 | DRD4    | 54102 | CLIC6    | L |
| 1816 | DRD5    | 2566  | GABRG2   | L |
| 1816 | DRD5    | 2768  | GNA12    | L |
| 1816 | DRD5    | 2781  | GNAZ     | L |

|      |         |        |         |   |
|------|---------|--------|---------|---|
| 1816 | DRD5    | 10672  | GNA13   | L |
| 1816 | DRD5    | 23413  | FREQ    | L |
| 1819 | DRG2    | 51389  | RWDD1   | R |
| 1820 | ARID3A  | 1832   | DSP     | L |
| 1820 | ARID3A  | 1869   | E2F1    | L |
| 1821 | DRP2    | 1837   | DTNA    | L |
| 1821 | DRP2    | 57716  | PRX     | L |
| 1822 | ATN1    | 7088   | TLE1    | S |
| 1822 | ATN1    | 7431   | VIM     | S |
| 1822 | ATN1    | 9223   | MAG1    | L |
| 1822 | ATN1    | 10015  | PDCD6IP | L |
| 1822 | ATN1    | 10458  | BAIAP2  | L |
| 1822 | ATN1    | 11059  | WWP1    | L |
| 1822 | ATN1    | 11060  | WWP2    | L |
| 1822 | ATN1    | 11143  | MYST2   | S |
| 1822 | ATN1    | 83737  | ITCH    | L |
| 1822 | ATN1    | 222019 | (null)  | S |
| 1823 | DSC1    | 1829   | DSG2    | L |
| 1823 | DSC1    | 1832   | DSP     | L |
| 1823 | DSC1    | 3728   | JUP     | L |
| 1823 | DSC1    | 5318   | PKP2    | L |
| 1823 | DSC1    | 11187  | PKP3    | L |
| 1824 | DSC2    | 1828   | DSG1    | L |
| 1824 | DSC2    | 1829   | DSG2    | L |
| 1824 | DSC2    | 3728   | JUP     | L |
| 1824 | DSC2    | 5318   | PKP2    | L |
| 1824 | DSC2    | 11187  | PKP3    | L |
| 1825 | DSC3    | 3728   | JUP     | L |
| 1825 | DSC3    | 8502   | PKP4    | L |
| 1825 | DSC3    | 11187  | PKP3    | L |
| 1828 | DSG1    | 3728   | JUP     | L |
| 1828 | DSG1    | 5317   | PKP1    | L |
| 1828 | DSG1    | 5318   | PKP2    | L |
| 1828 | DSG1    | 25818  | KLK5    | L |
| 1829 | DSG2    | 3728   | JUP     | L |
| 1829 | DSG2    | 5318   | PKP2    | L |
| 1829 | DSG2    | 11187  | PKP3    | L |
| 1830 | DSG3    | 3728   | JUP     | L |
| 1831 | TSC22D3 | 2353   | FOS     | L |
| 1831 | TSC22D3 | 3725   | JUN     | L |
| 1831 | TSC22D3 | 4790   | NFKB1   | L |
| 1831 | TSC22D3 | 4791   | NFKB2   | L |
| 1831 | TSC22D3 | 5894   | RAF1    | L |
| 1831 | TSC22D3 | 51440  | HPCAL4  | R |
| 1831 | TSC22D3 | 79666  | PLEKHF2 | R |
| 1832 | DSP     | 2125   | EVPL    | L |
| 1832 | DSP     | 3728   | JUP     | L |
| 1832 | DSP     | 3848   | KRT1    | L |
| 1832 | DSP     | 5175   | PECAM1  | L |
| 1832 | DSP     | 5317   | PKP1    | L |
| 1832 | DSP     | 5318   | PKP2    | L |
| 1832 | DSP     | 7431   | VIM     | L |
| 1837 | DTNA    | 3768   | KCNJ12  | L |
| 1837 | DTNA    | 6640   | SNTA1   | L |
| 1837 | DTNA    | 6641   | SNTB1   | L |
| 1837 | DTNA    | 6645   | SNTB2   | L |
| 1837 | DTNA    | 6714   | SRC     | L |
| 1837 | DTNA    | 7402   | UTRN    | L |
| 1837 | DTNA    | 23336  | DMN     | L |
| 1837 | DTNA    | 84062  | DTNBP1  | L |
| 1838 | DTNB    | 3798   | KIF5A   | L |
| 1838 | DTNB    | 7186   | TRAF2   | R |
| 1838 | DTNB    | 8495   | PPFIBP2 | R |
| 1838 | DTNB    | 10363  | HMG20A  | R |
| 1838 | DTNB    | 11007  | DIPA    | R |
| 1838 | DTNB    | 23636  | NUP62   | R |
| 1838 | DTNB    | 56952  | PRTFDC1 | R |



|      |       |        |          |   |
|------|-------|--------|----------|---|
| 1838 | DTNB  | 57596  | KIAA1446 | R |
| 1838 | DTNB  | 128229 | C1orf182 | R |
| 1839 | HBEGF | 1956   | EGFR     | L |
| 1839 | HBEGF | 2066   | ERBB4    | L |
| 1839 | HBEGF | 3732   | CD82     | L |
| 1839 | HBEGF | 4316   | MMP7     | L |
| 1839 | HBEGF | 4898   | NRD1     | L |
| 1839 | HBEGF | 7704   | ZBTB16   | L |
| 1840 | DTX1  | 2033   | EP300    | L |
| 1840 | DTX1  | 2885   | GRB2     | L |
| 1840 | DTX1  | 4853   | NOTCH2   | L |
| 1843 | DUSP1 | 5594   | MAPK1    | L |
| 1843 | DUSP1 | 5595   | MAPK3    | L |
| 1843 | DUSP1 | 5599   | MAPK8    | L |
| 1843 | DUSP1 | 6300   | MAPK12   | L |
| 1845 | DUSP3 | 1950   | EGF      | L |
| 1845 | DUSP3 | 2252   | FGF7     | L |
| 1845 | DUSP3 | 5594   | MAPK1    | L |
| 1845 | DUSP3 | 5595   | MAPK3    | L |
| 1846 | DUSP4 | 5594   | MAPK1    | L |
| 1846 | DUSP4 | 5595   | MAPK3    | L |
| 1847 | DUSP5 | 5595   | MAPK3    | L |
| 1848 | DUSP6 | 4188   | MDFI     | R |
| 1848 | DUSP6 | 5594   | MAPK1    | L |
| 1848 | DUSP6 | 5595   | MAPK3    | L |
| 1848 | DUSP6 | 56159  | TEX11    | R |
| 1854 | DUT   | 5465   | PPARA    | L |
| 1854 | DUT   | 5467   | PPARD    | L |
| 1854 | DUT   | 5468   | PPARG    | L |
| 1854 | DUT   | 9825   | SPATA2   | R |
| 1854 | DUT   | 79873  | NUDT18   | R |
| 1855 | DVL1  | 1857   | DVL3     | L |
| 1855 | DVL1  | 2059   | EPS8     | L |
| 1855 | DVL1  | 2932   | GSK3B    | L |
| 1855 | DVL1  | 4087   | SMAD2    | L |
| 1855 | DVL1  | 5494   | PPM1A    | L |
| 1855 | DVL1  | 6993   | TCTEL1   | L |
| 1855 | DVL1  | 8312   | AXIN1    | L |
| 1855 | DVL1  | 8975   | USP13    | S |
| 1855 | DVL1  | 10023  | FRAT1    | L |
| 1855 | DVL1  | 23002  | DAAM1    | L |
| 1855 | DVL1  | 23072  | HECW1    | L |
| 1855 | DVL1  | 57216  | VANGL2   | L |
| 1855 | DVL1  | 307255 | (null)   | S |
| 1856 | DVL2  | 5092   | PCBD1    | R |
| 1856 | DVL2  | 5494   | PPM1A    | L |
| 1856 | DVL2  | 6993   | TCTEL1   | L |
| 1856 | DVL2  | 7157   | TP53     | R |
| 1856 | DVL2  | 7186   | TRAF2    | R |
| 1856 | DVL2  | 7718   | ZNF165   | R |
| 1856 | DVL2  | 8078   | USP5     | R |
| 1856 | DVL2  | 8312   | AXIN1    | L |
| 1856 | DVL2  | 8907   | AP1M1    | R |
| 1856 | DVL2  | 9129   | PRPF3    | R |
| 1856 | DVL2  | 9531   | BAG3     | R |
| 1856 | DVL2  | 10127  | ZNF263   | R |
| 1856 | DVL2  | 10174  | SORBS3   | R |
| 1856 | DVL2  | 10445  | MCRS1    | R |
| 1856 | DVL2  | 10921  | RNPS1    | R |
| 1856 | DVL2  | 11030  | RBPMS    | R |
| 1856 | DVL2  | 11201  | POLI     | R |
| 1856 | DVL2  | 11267  | SNF8     | R |
| 1856 | DVL2  | 11338  | U2AF2    | R |
| 1856 | DVL2  | 22893  | BAHD1    | R |
| 1856 | DVL2  | 51224  | TCEB3B   | R |
| 1856 | DVL2  | 55145  | THAP1    | R |
| 1856 | DVL2  | 58500  | ZNF250   | R |

|      |        |        |           |   |
|------|--------|--------|-----------|---|
| 1856 | DVL2   | 79753  | SNIP1     | R |
| 1856 | DVL2   | 79869  | FLJ12529  | R |
| 1856 | DVL2   | 80125  | FLJ32855  | R |
| 1856 | DVL2   | 84080  | C16orf48  | R |
| 1856 | DVL2   | 84528  | PEPP-2    | R |
| 1856 | DVL2   | 84904  | C9orf100  | R |
| 1856 | DVL2   | 90268  | LOC90268  | R |
| 1856 | DVL2   | 92610  | TIFA      | R |
| 1856 | DVL2   | 127557 | ZBTB8     | R |
| 1856 | DVL2   | 151871 | DPPA2     | R |
| 1856 | DVL2   | 414301 | DDI1      | R |
| 1857 | DVL3   | 3104   | HKR3      | R |
| 1857 | DVL3   | 4062   | LY6H      | S |
| 1857 | DVL3   | 5307   | PITX1     | R |
| 1857 | DVL3   | 8812   | CCNK      | R |
| 1857 | DVL3   | 9129   | PRPF3     | R |
| 1857 | DVL3   | 11143  | MYST2     | R |
| 1857 | DVL3   | 22893  | BAHD1     | R |
| 1857 | DVL3   | 57473  | GM632     | L |
| 1857 | DVL3   | 59349  | KLHL12    | R |
| 1857 | DVL3   | 79797  | ZNF408    | R |
| 1857 | DVL3   | 79856  | SNX22     | R |
| 1857 | DVL3   | 84708  | LNX       | R |
| 1857 | DVL3   | 85362  | (null)    | R |
| 1857 | DVL3   | 126282 | TNFAIP8L1 | R |
| 1857 | DVL3   | 151871 | DPPA2     | R |
| 1859 | DYRK1A | 81669  | CCNL2     | L |
| 1861 | TOR1A  | 6622   | SNCA      | L |
| 1869 | E2F1   | 2965   | GTF2H1    | L |
| 1869 | E2F1   | 4194   | MDM4      | L |
| 1869 | E2F1   | 4331   | MNAT1     | L |
| 1869 | E2F1   | 4692   | NDN       | L |
| 1869 | E2F1   | 4790   | NFKB1     | L |
| 1869 | E2F1   | 5245   | PHB       | L |
| 1869 | E2F1   | 5813   | PURA      | L |
| 1869 | E2F1   | 5925   | RB1       | L |
| 1869 | E2F1   | 5926   | ARID4A    | L |
| 1869 | E2F1   | 5934   | RBL2      | L |
| 1869 | E2F1   | 6046   | BRD2      | L |
| 1869 | E2F1   | 6502   | SKP2      | L |
| 1869 | E2F1   | 6667   | SP1       | L |
| 1869 | E2F1   | 6668   | SP2       | L |
| 1869 | E2F1   | 6670   | SP3       | L |
| 1869 | E2F1   | 6671   | SP4       | L |
| 1869 | E2F1   | 7027   | TFDP1     | L |
| 1869 | E2F1   | 7029   | TFDP2     | L |
| 1869 | E2F1   | 8202   | NCOA3     | L |
| 1869 | E2F1   | 8295   | TRRAP     | L |
| 1869 | E2F1   | 8454   | CUL1      | L |
| 1869 | E2F1   | 8900   | CCNA1     | L |
| 1869 | E2F1   | 9150   | CTDP1     | L |
| 1869 | E2F1   | 11073  | TOPBP1    | L |
| 1870 | E2F2   | 5925   | RB1       | L |
| 1870 | E2F2   | 6046   | BRD2      | L |
| 1870 | E2F2   | 6667   | SP1       | L |
| 1870 | E2F2   | 7027   | TFDP1     | L |
| 1870 | E2F2   | 7029   | TFDP2     | L |
| 1870 | E2F2   | 7528   | YY1       | L |
| 1870 | E2F2   | 9564   | BCAR1     | S |
| 1870 | E2F2   | 23429  | RYBP      | L |
| 1871 | E2F3   | 6667   | SP1       | L |
| 1871 | E2F3   | 7027   | TFDP1     | L |
| 1871 | E2F3   | 7029   | TFDP2     | L |
| 1871 | E2F3   | 7030   | TFE3      | L |
| 1871 | E2F3   | 7528   | YY1       | L |
| 1871 | E2F3   | 23429  | RYBP      | L |
| 1874 | E2F4   | 3065   | HDAC1     | L |

|      |        |        |          |    |
|------|--------|--------|----------|----|
| 1874 | E2F4   | 4087   | SMAD2    | L  |
| 1874 | E2F4   | 4088   | SMAD3    | L  |
| 1874 | E2F4   | 4692   | NDN      | L  |
| 1874 | E2F4   | 5933   | RBL1     | L  |
| 1874 | E2F4   | 5934   | RBL2     | L  |
| 1874 | E2F4   | 7027   | TFDP1    | L  |
| 1874 | E2F4   | 7029   | TFDP2    | L  |
| 1874 | E2F4   | 23309  | SIN3B    | L  |
| 1875 | E2F5   | 5934   | RBL2     | L  |
| 1875 | E2F5   | 7027   | TFDP1    | L  |
| 1875 | E2F5   | 7514   | XPO1     | L  |
| 1876 | E2F6   | 7027   | TFDP1    | R  |
| 1876 | E2F6   | 7029   | TFDP2    | RL |
| 1876 | E2F6   | 23429  | RYBP     | L  |
| 1876 | E2F6   | 84108  | PCGF6    | L  |
| 1877 | E4F1   | 4093   | SMAD9    | L  |
| 1877 | E4F1   | 5925   | RB1      | L  |
| 1877 | E4F1   | 7157   | TP53     | L  |
| 1877 | E4F1   | 10919  | EHMT2    | R  |
| 1879 | EBF    | 23090  | ZNF423   | L  |
| 1880 | EBI2   | 9112   | MTA1     | S  |
| 1891 | ECH1   | 1937   | EEF1G    | S  |
| 1891 | ECH1   | 5050   | PAFAH1B3 | S  |
| 1891 | ECH1   | 5272   | SERPINB9 | S  |
| 1891 | ECH1   | 7076   | TIMP1    | S  |
| 1892 | ECHS1  | 150472 | CBWD2    | S  |
| 1896 | EDA    | 10913  | EDAR     | L  |
| 1896 | EDA    | 60401  | EDA2R    | L  |
| 1901 | EDG1   | 2770   | GNAI1    | L  |
| 1901 | EDG1   | 2773   | GNAI3    | L  |
| 1901 | EDG1   | 3350   | HTR1A    | L  |
| 1901 | EDG1   | 3352   | HTR1D    | L  |
| 1901 | EDG1   | 5159   | PDGFRB   | L  |
| 1902 | EDG2   | 2773   | GNAI3    | L  |
| 1903 | EDG3   | 2770   | GNAI1    | L  |
| 1903 | EDG3   | 2776   | GNAQ     | L  |
| 1903 | EDG3   | 3350   | HTR1A    | L  |
| 1903 | EDG3   | 10672  | GNA13    | L  |
| 1906 | EDN1   | 1909   | EDNRA    | L  |
| 1906 | EDN1   | 1910   | EDNRB    | L  |
| 1906 | EDN1   | 4880   | NPPC     | L  |
| 1906 | EDN1   | 7917   | BAT3     | S  |
| 1906 | EDN1   | 10980  | COPS6    | S  |
| 1908 | EDN3   | 1909   | EDNRA    | L  |
| 1908 | EDN3   | 1910   | EDNRB    | L  |
| 1909 | EDNRA  | 2767   | GNA11    | L  |
| 1909 | EDNRA  | 2771   | GNAI2    | L  |
| 1909 | EDNRA  | 2870   | GRK6     | L  |
| 1910 | EDNRB  | 2767   | GNA11    | L  |
| 1910 | EDNRB  | 2870   | GRK6     | L  |
| 1910 | EDNRB  | 10672  | GNA13    | L  |
| 1911 | PHC1   | 1912   | PHC2     | R  |
| 1911 | PHC1   | 3312   | HSPA8    | S  |
| 1911 | PHC1   | 7329   | UBE2I    | R  |
| 1911 | PHC1   | 51460  | SFMBT1   | R  |
| 1912 | PHC2   | 2275   | FHL3     | R  |
| 1912 | PHC2   | 4171   | MCM2     | S  |
| 1912 | PHC2   | 6129   | RPL7     | S  |
| 1912 | PHC2   | 10445  | MCRS1    | R  |
| 1912 | PHC2   | 10939  | AFG3L2   | S  |
| 1912 | PHC2   | 22955  | SCMH1    | S  |
| 1912 | PHC2   | 51460  | SFMBT1   | R  |
| 1912 | PHC2   | 54968  | TMEM70   | S  |
| 1912 | PHC2   | 55108  | BSDC1    | S  |
| 1912 | PHC2   | 55885  | LMO3     | R  |
| 1915 | EEF1A1 | 3336   | HSPE1    | S  |
| 1915 | EEF1A1 | 3910   | LAMA4    | S  |

|      |        |       |          |   |
|------|--------|-------|----------|---|
| 1915 | EEF1A1 | 4087  | SMAD2    | L |
| 1915 | EEF1A1 | 4089  | SMAD4    | L |
| 1915 | EEF1A1 | 4300  | MLLT3    | S |
| 1915 | EEF1A1 | 4331  | MNAT1    | S |
| 1915 | EEF1A1 | 4758  | NEU1     | S |
| 1915 | EEF1A1 | 5047  | PAEP     | S |
| 1915 | EEF1A1 | 5050  | PAFAH1B3 | S |
| 1915 | EEF1A1 | 5217  | PFN2     | S |
| 1915 | EEF1A1 | 5272  | SERPINB9 | S |
| 1915 | EEF1A1 | 5329  | PLAUR    | S |
| 1915 | EEF1A1 | 5335  | PLCG1    | L |
| 1915 | EEF1A1 | 5427  | POLE2    | S |
| 1915 | EEF1A1 | 5432  | POLR2C   | S |
| 1915 | EEF1A1 | 5678  | PSG9     | S |
| 1915 | EEF1A1 | 5717  | PSMD11   | S |
| 1915 | EEF1A1 | 5775  | PTPN4    | S |
| 1915 | EEF1A1 | 5790  | PTPRCAP  | S |
| 1915 | EEF1A1 | 5873  | RAB27A   | S |
| 1915 | EEF1A1 | 5985  | RFC5     | S |
| 1915 | EEF1A1 | 6118  | RPA2     | S |
| 1915 | EEF1A1 | 6176  | RPLP1    | S |
| 1915 | EEF1A1 | 6362  | CCL18    | S |
| 1915 | EEF1A1 | 6453  | ITSN1    | S |
| 1915 | EEF1A1 | 6745  | SSR1     | S |
| 1915 | EEF1A1 | 6783  | SULT1E1  | S |
| 1915 | EEF1A1 | 6880  | TAF9     | S |
| 1915 | EEF1A1 | 7050  | TGIF     | S |
| 1915 | EEF1A1 | 7159  | TP53BP2  | S |
| 1915 | EEF1A1 | 7276  | TTR      | S |
| 1915 | EEF1A1 | 7407  | VARS     | L |
| 1915 | EEF1A1 | 7414  | VCL      | L |
| 1915 | EEF1A1 | 7572  | ZNF24    | S |
| 1915 | EEF1A1 | 8312  | AXIN1    | S |
| 1915 | EEF1A1 | 8655  | DNCL1    | S |
| 1915 | EEF1A1 | 8665  | EIF3S5   | S |
| 1915 | EEF1A1 | 8738  | CRADD    | S |
| 1915 | EEF1A1 | 8882  | ZNF259   | L |
| 1915 | EEF1A1 | 9061  | PAPSS1   | S |
| 1915 | EEF1A1 | 9587  | MAD2L1BP | S |
| 1915 | EEF1A1 | 9796  | PHYHIP   | S |
| 1915 | EEF1A1 | 9921  | RNF10    | S |
| 1915 | EEF1A1 | 10063 | COX17    | S |
| 1915 | EEF1A1 | 10084 | PQBP1    | S |
| 1915 | EEF1A1 | 10301 | DLEU1    | S |
| 1915 | EEF1A1 | 10425 | ARIH2    | S |
| 1915 | EEF1A1 | 10542 | HBXIP    | S |
| 1915 | EEF1A1 | 10571 | SMA3     | S |
| 1915 | EEF1A1 | 10916 | MAGED2   | S |
| 1915 | EEF1A1 | 11075 | STMN2    | S |
| 1915 | EEF1A1 | 19241 | (null)   | S |
| 1915 | EEF1A1 | 22803 | XRN2     | L |
| 1915 | EEF1A1 | 23095 | KIF1B    | S |
| 1915 | EEF1A1 | 25855 | BRMS1    | S |
| 1915 | EEF1A1 | 27258 | LSM3     | S |
| 1915 | EEF1A1 | 28977 | MRPL42   | S |
| 1915 | EEF1A1 | 51319 | RSRC1    | S |
| 1915 | EEF1A1 | 54512 | EXOSC4   | L |
| 1915 | EEF1A1 | 54544 | C1orf42  | S |
| 1915 | EEF1A1 | 54819 | ZCCHC10  | S |
| 1915 | EEF1A1 | 54949 | FLJ20487 | S |
| 1915 | EEF1A1 | 55004 | FLJ20625 | S |
| 1915 | EEF1A1 | 55643 | BTBD2    | S |
| 1915 | EEF1A1 | 56144 | PCDHA4   | S |
| 1915 | EEF1A1 | 56893 | UBQLN4   | S |
| 1915 | EEF1A1 | 57510 | XPO5     | L |
| 1915 | EEF1A1 | 64699 | TMPRSS3  | S |
| 1915 | EEF1A1 | 81576 | MGC10471 | S |

|      |        |        |           |    |
|------|--------|--------|-----------|----|
| 1915 | EEF1A1 | 94103  | ORMDL3    | S  |
| 1915 | EEF1A1 | 170961 | ANKRD24   | S  |
| 1933 | EEF1B2 | 1937   | EEF1G     | RS |
| 1933 | EEF1B2 | 3035   | HARS      | L  |
| 1933 | EEF1B2 | 7076   | TIMP1     | S  |
| 1933 | EEF1B2 | 9706   | ULK2      | S  |
| 1936 | EEF1D  | 1937   | EEF1G     | RS |
| 1936 | EEF1D  | 2617   | GARS      | L  |
| 1936 | EEF1D  | 3895   | KTN1      | L  |
| 1936 | EEF1D  | 7407   | VARS      | L  |
| 1936 | EEF1D  | 84164  | ASCC2     | S  |
| 1936 | EEF1D  | 118924 | C10orf4   | S  |
| 1936 | EEF1D  | 162952 | (null)    | S  |
| 1936 | EEF1D  | 284004 | FLJ23825  | S  |
| 1937 | EEF1G  | 1942   | EFNA1     | S  |
| 1937 | EEF1G  | 2237   | FEN1      | S  |
| 1937 | EEF1G  | 2290   | FOXG1B    | S  |
| 1937 | EEF1G  | 3035   | HARS      | L  |
| 1937 | EEF1G  | 3163   | HMOX2     | S  |
| 1937 | EEF1G  | 3189   | HNRPH3    | S  |
| 1937 | EEF1G  | 3608   | ILF2      | R  |
| 1937 | EEF1G  | 3735   | KARS      | S  |
| 1937 | EEF1G  | 4597   | MVD       | S  |
| 1937 | EEF1G  | 5717   | PSMD11    | S  |
| 1937 | EEF1G  | 5775   | PTPN4     | S  |
| 1937 | EEF1G  | 5802   | PTPRS     | S  |
| 1937 | EEF1G  | 5863   | RGL2      | S  |
| 1937 | EEF1G  | 6234   | RPS28     | S  |
| 1937 | EEF1G  | 6303   | SAT       | S  |
| 1937 | EEF1G  | 6498   | SKIL      | L  |
| 1937 | EEF1G  | 6633   | SNRPD2    | S  |
| 1937 | EEF1G  | 7572   | ZNF24     | S  |
| 1937 | EEF1G  | 8440   | NCK2      | S  |
| 1937 | EEF1G  | 9141   | PDCD5     | S  |
| 1937 | EEF1G  | 9400   | RECQL5    | S  |
| 1937 | EEF1G  | 9446   | GSTO1     | S  |
| 1937 | EEF1G  | 9540   | TP53I3    | S  |
| 1937 | EEF1G  | 10014  | HDAC5     | S  |
| 1937 | EEF1G  | 10060  | ABCC9     | R  |
| 1937 | EEF1G  | 10301  | DLEU1     | S  |
| 1937 | EEF1G  | 10381  | TUBB3     | S  |
| 1937 | EEF1G  | 10425  | ARIH2     | S  |
| 1937 | EEF1G  | 10563  | CXCL13    | S  |
| 1937 | EEF1G  | 10574  | CCT7      | S  |
| 1937 | EEF1G  | 23557  | SNAPAP    | S  |
| 1937 | EEF1G  | 29903  | HSU79303  | S  |
| 1937 | EEF1G  | 51003  | MED31     | S  |
| 1937 | EEF1G  | 51520  | LARS      | L  |
| 1937 | EEF1G  | 51608  | C7orf20   | S  |
| 1937 | EEF1G  | 55068  | FLJ10094  | S  |
| 1937 | EEF1G  | 55339  | WDR33     | S  |
| 1937 | EEF1G  | 55743  | CHFR      | S  |
| 1937 | EEF1G  | 55755  | CDK5RAP2  | S  |
| 1937 | EEF1G  | 55803  | CENTA2    | S  |
| 1937 | EEF1G  | 57332  | CBX8      | S  |
| 1937 | EEF1G  | 57664  | PLEKHA4   | S  |
| 1937 | EEF1G  | 57761  | TRIB3     | S  |
| 1937 | EEF1G  | 65220  | NADK      | S  |
| 1937 | EEF1G  | 78987  | CRELD1    | S  |
| 1937 | EEF1G  | 79676  | FLJ13491  | S  |
| 1937 | EEF1G  | 79902  | PCNT1     | S  |
| 1937 | EEF1G  | 84331  | MGC15416  | S  |
| 1937 | EEF1G  | 116154 | PHACTR3   | S  |
| 1937 | EEF1G  | 126272 | EID-3     | S  |
| 1937 | EEF1G  | 158345 | LOC158345 | S  |
| 1937 | EEF1G  | 196549 | LOC196549 | R  |
| 1937 | EEF1G  | 222019 | (null)    | S  |

|      |        |        |           |   |
|------|--------|--------|-----------|---|
| 1937 | EEF1G  | 339448 | LOC339448 | S |
| 1938 | EEF2   | 7157   | TP53      | L |
| 1938 | EEF2   | 54822  | TRPM7     | L |
| 1942 | EFNA1  | 1969   | EPHA2     | L |
| 1942 | EFNA1  | 2041   | EPHA1     | L |
| 1942 | EFNA1  | 2043   | EPHA4     | L |
| 1942 | EFNA1  | 2044   | EPHA5     | L |
| 1942 | EFNA1  | 2045   | EPHA7     | L |
| 1942 | EFNA1  | 5473   | PPBP      | S |
| 1942 | EFNA1  | 10524  | HTATIP    | S |
| 1942 | EFNA1  | 222019 | (null)    | S |
| 1943 | EFNA2  | 1969   | EPHA2     | L |
| 1943 | EFNA2  | 2042   | EPHA3     | L |
| 1944 | EFNA3  | 1969   | EPHA2     | L |
| 1944 | EFNA3  | 2043   | EPHA4     | L |
| 1944 | EFNA3  | 2044   | EPHA5     | L |
| 1944 | EFNA3  | 2045   | EPHA7     | L |
| 1944 | EFNA3  | 11098  | PRSS23    | S |
| 1945 | EFNA4  | 1969   | EPHA2     | L |
| 1945 | EFNA4  | 2043   | EPHA4     | L |
| 1945 | EFNA4  | 2045   | EPHA7     | L |
| 1946 | EFNA5  | 1969   | EPHA2     | L |
| 1946 | EFNA5  | 2042   | EPHA3     | L |
| 1946 | EFNA5  | 2043   | EPHA4     | L |
| 1946 | EFNA5  | 2044   | EPHA5     | L |
| 1946 | EFNA5  | 2045   | EPHA7     | L |
| 1946 | EFNA5  | 2046   | EPHA8     | L |
| 1946 | EFNA5  | 2047   | EPHB1     | L |
| 1947 | EFNB1  | 2047   | EPHB1     | L |
| 1947 | EFNB1  | 2048   | EPHB2     | L |
| 1947 | EFNB1  | 5783   | PTPN13    | L |
| 1947 | EFNB1  | 5998   | RGS3      | L |
| 1947 | EFNB1  | 6386   | SDCBP     | L |
| 1947 | EFNB1  | 6714   | SRC       | L |
| 1947 | EFNB1  | 8440   | NCK2      | L |
| 1947 | EFNB1  | 10580  | SORBS1    | L |
| 1948 | EFNB2  | 2042   | EPHA3     | L |
| 1948 | EFNB2  | 2043   | EPHA4     | L |
| 1948 | EFNB2  | 2047   | EPHB1     | L |
| 1948 | EFNB2  | 2048   | EPHB2     | L |
| 1948 | EFNB2  | 2050   | EPHB4     | L |
| 1948 | EFNB2  | 2051   | EPHB6     | L |
| 1948 | EFNB2  | 6386   | SDCBP     | L |
| 1948 | EFNB2  | 8440   | NCK2      | L |
| 1948 | EFNB2  | 54933  | RHBDL2    | L |
| 1949 | EFNB3  | 2043   | EPHA4     | L |
| 1949 | EFNB3  | 2049   | EPHB3     | L |
| 1949 | EFNB3  | 54933  | RHBDL2    | L |
| 1950 | EGF    | 1956   | EGFR      | L |
| 1950 | EGF    | 2064   | ERBB2     | L |
| 1950 | EGF    | 2065   | ERBB3     | L |
| 1950 | EGF    | 2250   | FGF5      | L |
| 1950 | EGF    | 2885   | GRB2      | L |
| 1950 | EGF    | 3084   | NRG1      | L |
| 1950 | EGF    | 5296   | PIK3R2    | L |
| 1950 | EGF    | 7448   | VTN       | L |
| 1951 | CELSR3 | 9905   | RUTBC1    | S |
| 1951 | CELSR3 | 23075  | SWAP70    | L |
| 1952 | CELSR2 | 2617   | GARS      | S |
| 1952 | CELSR2 | 55274  | PHF10     | S |
| 1956 | EGFR   | 2059   | EPS8      | L |
| 1956 | EGFR   | 2060   | EPS15     | L |
| 1956 | EGFR   | 2064   | ERBB2     | L |
| 1956 | EGFR   | 2065   | ERBB3     | L |
| 1956 | EGFR   | 2069   | EREG      | L |
| 1956 | EGFR   | 2099   | ESR1      | L |
| 1956 | EGFR   | 2185   | PTK2B     | L |

|      |      |       |         |   |
|------|------|-------|---------|---|
| 1956 | EGFR | 2241  | FER     | L |
| 1956 | EGFR | 2547  | XRCC6   | L |
| 1956 | EGFR | 2549  | GAB1    | L |
| 1956 | EGFR | 2771  | GNAI2   | L |
| 1956 | EGFR | 2885  | GRB2    | L |
| 1956 | EGFR | 2886  | GRB7    | L |
| 1956 | EGFR | 2887  | GRB10   | L |
| 1956 | EGFR | 2888  | GRB14   | L |
| 1956 | EGFR | 3064  | HD      | L |
| 1956 | EGFR | 3084  | NRG1    | L |
| 1956 | EGFR | 3320  | HSPCA   | L |
| 1956 | EGFR | 3371  | TNC     | L |
| 1956 | EGFR | 3636  | INPPL1  | L |
| 1956 | EGFR | 3678  | ITGA5   | L |
| 1956 | EGFR | 3732  | CD82    | L |
| 1956 | EGFR | 3855  | KRT7    | L |
| 1956 | EGFR | 3856  | KRT8    | L |
| 1956 | EGFR | 3872  | KRT17   | L |
| 1956 | EGFR | 3875  | KRT18   | L |
| 1956 | EGFR | 4582  | MUC1    | L |
| 1956 | EGFR | 4690  | NCK1    | L |
| 1956 | EGFR | 5058  | PAK1    | L |
| 1956 | EGFR | 5159  | PDGFRB  | L |
| 1956 | EGFR | 5287  | PIK3C2B | L |
| 1956 | EGFR | 5295  | PIK3R1  | L |
| 1956 | EGFR | 5296  | PIK3R2  | L |
| 1956 | EGFR | 5306  | PITPNA  | L |
| 1956 | EGFR | 5335  | PLCG1   | L |
| 1956 | EGFR | 5338  | PLD2    | L |
| 1956 | EGFR | 5339  | PLEC1   | L |
| 1956 | EGFR | 5359  | PLSCR1  | L |
| 1956 | EGFR | 5566  | PRKACA  | L |
| 1956 | EGFR | 5573  | PRKAR1A | L |
| 1956 | EGFR | 5578  | PRKCA   | L |
| 1956 | EGFR | 5747  | PTK2    | L |
| 1956 | EGFR | 5753  | PTK6    | L |
| 1956 | EGFR | 5770  | PTPN1   | L |
| 1956 | EGFR | 5777  | PTPN6   | L |
| 1956 | EGFR | 5781  | PTPN11  | L |
| 1956 | EGFR | 5795  | PTPRJ   | L |
| 1956 | EGFR | 5921  | RASA1   | L |
| 1956 | EGFR | 6004  | RGS16   | L |
| 1956 | EGFR | 6464  | SHC1    | L |
| 1956 | EGFR | 6633  | SNRPD2  | L |
| 1956 | EGFR | 6642  | SNX1    | L |
| 1956 | EGFR | 6643  | SNX2    | L |
| 1956 | EGFR | 6654  | SOS1    | L |
| 1956 | EGFR | 6655  | SOS2    | L |
| 1956 | EGFR | 6714  | SRC     | L |
| 1956 | EGFR | 6772  | STAT1   | L |
| 1956 | EGFR | 6774  | STAT3   | L |
| 1956 | EGFR | 6776  | STAT5A  | L |
| 1956 | EGFR | 6777  | STAT5B  | L |
| 1956 | EGFR | 7039  | TGFA    | L |
| 1956 | EGFR | 7082  | TJP1    | L |
| 1956 | EGFR | 7409  | VAV1    | L |
| 1956 | EGFR | 7410  | VAV2    | L |
| 1956 | EGFR | 8440  | NCK2    | L |
| 1956 | EGFR | 8651  | SOCS1   | L |
| 1956 | EGFR | 8723  | SNX4    | L |
| 1956 | EGFR | 8737  | RIPK1   | L |
| 1956 | EGFR | 8882  | ZNF259  | L |
| 1956 | EGFR | 9020  | MAP3K14 | L |
| 1956 | EGFR | 9021  | SOCS3   | L |
| 1956 | EGFR | 9046  | DOK2    | L |
| 1956 | EGFR | 9905  | RUTBC1  | S |
| 1956 | EGFR | 10045 | SH2D3A  | L |

|      |          |       |           |    |
|------|----------|-------|-----------|----|
| 1956 | EGFR     | 10188 | TNK2      | L  |
| 1956 | EGFR     | 10451 | VAV3      | L  |
| 1956 | EGFR     | 11184 | MAP4K1    | L  |
| 1956 | EGFR     | 23624 | CBLC      | L  |
| 1956 | EGFR     | 54206 | ERRFI1    | L  |
| 1956 | EGFR     | 83481 | EPPK1     | L  |
| 1958 | EGR1     | 2033  | EP300     | L  |
| 1958 | EGR1     | 3725  | JUN       | L  |
| 1958 | EGR1     | 4664  | NAB1      | L  |
| 1958 | EGR1     | 4665  | NAB2      | L  |
| 1958 | EGR1     | 4773  | NFATC2    | L  |
| 1958 | EGR1     | 5307  | PITX1     | L  |
| 1958 | EGR1     | 5684  | PSMA3     | L  |
| 1958 | EGR1     | 5970  | RELA      | L  |
| 1958 | EGR1     | 6667  | SP1       | L  |
| 1958 | EGR1     | 7157  | TP53      | L  |
| 1959 | EGR2     | 3054  | HCFC1     | L  |
| 1959 | EGR2     | 51003 | MED31     | S  |
| 1961 | EGR4     | 4773  | NFATC2    | L  |
| 1962 | EHHADH   | 6342  | SCP2      | L  |
| 1964 | EIF1AX   | 1983  | EIF5      | L  |
| 1964 | EIF1AX   | 5901  | RAN       | L  |
| 1964 | EIF1AX   | 8663  | EIF3S8    | L  |
| 1964 | EIF1AX   | 9669  | EIF5B     | L  |
| 1965 | EIF2S1   | 5610  | EIF2AK2   | L  |
| 1965 | EIF2S1   | 8892  | EIF2B2    | L  |
| 1965 | EIF2S1   | 23645 | PPP1R15A  | L  |
| 1967 | EIF2B1   | 8892  | EIF2B2    | L  |
| 1967 | EIF2B1   | 8894  | EIF2S2    | L  |
| 1967 | EIF2B1   | 51073 | MRPL4     | S  |
| 1968 | EIF2S3   | 10988 | METAP2    | L  |
| 1969 | EPHA2    | 2885  | GRB2      | L  |
| 1969 | EPHA2    | 5295  | PIK3R1    | L  |
| 1969 | EPHA2    | 5747  | PTK2      | L  |
| 1969 | EPHA2    | 5781  | PTPN11    | L  |
| 1969 | EPHA2    | 6464  | SHC1      | L  |
| 1969 | EPHA2    | 6503  | SLA       | L  |
| 1969 | EPHA2    | 7126  | TNFAIP1   | L  |
| 1973 | EIF4A1   | 9890  | LPPR4     | S  |
| 1973 | EIF4A1   | 26019 | UPF2      | L  |
| 1975 | EIF4B    | 1977  | EIF4E     | L  |
| 1975 | EIF4B    | 8661  | EIF3S10   | L  |
| 1975 | EIF4B    | 26986 | PABPC1    | L  |
| 1977 | EIF4E    | 1978  | EIF4EBP1  | RL |
| 1977 | EIF4E    | 1979  | EIF4EBP2  | L  |
| 1977 | EIF4E    | 1981  | EIF4G1    | L  |
| 1977 | EIF4E    | 1982  | EIF4G2    | L  |
| 1977 | EIF4E    | 5371  | PML       | L  |
| 1977 | EIF4E    | 7414  | VCL       | L  |
| 1977 | EIF4E    | 8550  | MAPKAPK5  | L  |
| 1977 | EIF4E    | 8637  | EIF4EBP3  | L  |
| 1977 | EIF4E    | 8672  | EIF4G3    | L  |
| 1977 | EIF4E    | 56478 | EIF4ENIF1 | L  |
| 1978 | EIF4EBP1 | 4597  | MVD       | S  |
| 1978 | EIF4EBP1 | 8550  | MAPKAPK5  | L  |
| 1978 | EIF4EBP1 | 54921 | DERPC     | R  |
| 1981 | EIF4G1   | 1983  | EIF5      | L  |
| 1981 | EIF4G1   | 8569  | MKNK1     | L  |
| 1981 | EIF4G1   | 9372  | ZFYVE9    | L  |
| 1981 | EIF4G1   | 27250 | PDCD4     | L  |
| 1982 | EIF4G2   | 6498  | SKIL      | L  |
| 1982 | EIF4G2   | 8569  | MKNK1     | L  |
| 1983 | EIF5     | 8666  | EIF3S4    | L  |
| 1983 | EIF5     | 8894  | EIF2S2    | L  |
| 1984 | EIF5A    | 6125  | RPL5      | L  |
| 1984 | EIF5A    | 7514  | XPO1      | L  |
| 1984 | EIF5A    | 22803 | XRN2      | L  |



|      |          |        |           |   |
|------|----------|--------|-----------|---|
| 1990 | ELA1     | 5265   | SERPINA1  | L |
| 1990 | ELA1     | 5266   | PI3       | L |
| 1991 | ELA2     | 1992   | SERPINB1  | L |
| 1991 | ELA2     | 2006   | ELN       | L |
| 1991 | ELA2     | 3827   | KNG1      | L |
| 1991 | ELA2     | 4035   | LRP1      | L |
| 1991 | ELA2     | 5054   | SERPINE1  | L |
| 1991 | ELA2     | 5265   | SERPINA1  | L |
| 1991 | ELA2     | 5275   | SERPINB13 | L |
| 1991 | ELA2     | 5345   | SERPINF2  | L |
| 1991 | ELA2     | 6382   | SDC1      | L |
| 1991 | ELA2     | 6590   | SLPI      | L |
| 1991 | ELA2     | 7057   | THBS1     | L |
| 1992 | SERPINB1 | 5657   | PRTN3     | L |
| 1995 | ELAVL3   | 2130   | EWSR1     | R |
| 1996 | ELAVL4   | 2130   | EWSR1     | R |
| 1997 | ELF1     | 4790   | NFKB1     | L |
| 1997 | ELF1     | 4801   | NFYB      | L |
| 1997 | ELF1     | 5925   | RB1       | L |
| 1997 | ELF1     | 6667   | SP1       | L |
| 1999 | ELF3     | 2060   | EPS15     | L |
| 1999 | ELF3     | 4790   | NFKB1     | L |
| 1999 | ELF3     | 9439   | CRSP3     | L |
| 2001 | ELF5     | 6210   | RPS15A    | R |
| 2001 | ELF5     | 51548  | SIRT6     | R |
| 2002 | ELK1     | 2353   | FOS       | L |
| 2002 | ELK1     | 2885   | GRB2      | L |
| 2002 | ELK1     | 2887   | GRB10     | L |
| 2002 | ELK1     | 5594   | MAPK1     | L |
| 2002 | ELK1     | 5595   | MAPK3     | L |
| 2002 | ELK1     | 6622   | SNCA      | L |
| 2002 | ELK1     | 8576   | STK16     | L |
| 2002 | ELK1     | 25843  | PREI3     | S |
| 2004 | ELK3     | 6929   | TCF3      | L |
| 2005 | ELK4     | 6722   | SRF       | L |
| 2006 | ELN      | 2192   | FBLN1     | L |
| 2006 | ELN      | 2199   | FBLN2     | L |
| 2006 | ELN      | 2200   | FBN1      | L |
| 2006 | ELN      | 2201   | FBN2      | L |
| 2006 | ELN      | 2219   | FCN1      | L |
| 2006 | ELN      | 3958   | LGALS3    | L |
| 2006 | ELN      | 4015   | LOX       | L |
| 2006 | ELN      | 4069   | LYZ       | L |
| 2006 | ELN      | 4237   | MFAP2     | L |
| 2006 | ELN      | 5657   | PRTN3     | L |
| 2006 | ELN      | 6690   | SPINK1    | L |
| 2006 | ELN      | 22795  | NID2      | L |
| 2006 | ELN      | 60681  | FKBP10    | L |
| 2009 | EML1     | 2895   | GRID2     | L |
| 2009 | EML1     | 81875  | ISG20L2   | R |
| 2010 | EMD      | 4000   | LMNA      | L |
| 2010 | EMD      | 5829   | PXN       | L |
| 2010 | EMD      | 6456   | SH3GL2    | S |
| 2010 | EMD      | 6457   | SH3GL3    | S |
| 2010 | EMD      | 8815   | BANF1     | L |
| 2010 | EMD      | 10488  | CREB3     | R |
| 2010 | EMD      | 10980  | COPS6     | S |
| 2010 | EMD      | 23345  | SYNE1     | L |
| 2010 | EMD      | 26993  | AKAP8L    | L |
| 2010 | EMD      | 55211  | DPPA4     | S |
| 2010 | EMD      | 89885  | FATE1     | R |
| 2010 | EMD      | 91746  | YT521     | L |
| 2010 | EMD      | 222389 | C10orf30  | R |
| 2017 | CTTN     | 2241   | FER       | L |
| 2017 | CTTN     | 2245   | FGD1      | L |
| 2017 | CTTN     | 2885   | GRB2      | L |
| 2017 | CTTN     | 3737   | KCNA2     | L |

|      |         |        |          |   |
|------|---------|--------|----------|---|
| 2017 | CTTN    | 4638   | MYLK     | L |
| 2017 | CTTN    | 6850   | SYK      | L |
| 2017 | CTTN    | 7082   | TJP1     | L |
| 2017 | CTTN    | 9672   | SDC3     | L |
| 2017 | CTTN    | 22941  | SHANK2   | L |
| 2017 | CTTN    | 55139  | FLJ10415 | S |
| 2022 | ENG     | 3624   | INHBA    | L |
| 2022 | ENG     | 7040   | TGFB1    | L |
| 2022 | ENG     | 7042   | TGFB2    | L |
| 2022 | ENG     | 7043   | TGFB3    | L |
| 2022 | ENG     | 7046   | TGFBR1   | L |
| 2022 | ENG     | 7048   | TGFBR2   | L |
| 2023 | ENO1    | 5340   | PLG      | L |
| 2023 | ENO1    | 5829   | PXN      | L |
| 2023 | ENO1    | 6399   | TRAPPC2  | L |
| 2026 | ENO2    | 2029   | ENSA     | S |
| 2026 | ENO2    | 3098   | HK1      | S |
| 2026 | ENO2    | 3297   | HSF1     | S |
| 2026 | ENO2    | 4134   | MAP4     | S |
| 2026 | ENO2    | 6483   | ST3GAL2  | S |
| 2026 | ENO2    | 7277   | TUBA1    | S |
| 2026 | ENO2    | 10073  | RNUT1    | S |
| 2026 | ENO2    | 11065  | UBE2C    | S |
| 2026 | ENO2    | 22927  | HABP4    | S |
| 2026 | ENO2    | 26151  | NAT9     | S |
| 2026 | ENO2    | 27190  | IL17B    | S |
| 2026 | ENO2    | 57827  | C6orf47  | S |
| 2026 | ENO2    | 59307  | SIGIRR   | S |
| 2026 | ENO2    | 89927  | C16orf45 | S |
| 2026 | ENO2    | 374291 | NDUFS7   | S |
| 2029 | ENSA    | 10425  | ARIH2    | S |
| 2029 | ENSA    | 79047  | KCTD15   | S |
| 2030 | SLC29A1 | 8859   | STK19    | L |
| 2033 | EP300   | 2099   | ESR1     | L |
| 2033 | EP300   | 2113   | ETS1     | L |
| 2033 | EP300   | 2114   | ETS2     | L |
| 2033 | EP300   | 2237   | FEN1     | L |
| 2033 | EP300   | 2627   | GATA6    | L |
| 2033 | EP300   | 2959   | GTF2B    | L |
| 2033 | EP300   | 3091   | HIF1A    | L |
| 2033 | EP300   | 3164   | NR4A1    | L |
| 2033 | EP300   | 3192   | HNRPU    | L |
| 2033 | EP300   | 3621   | ING1     | L |
| 2033 | EP300   | 4086   | SMAD1    | L |
| 2033 | EP300   | 4087   | SMAD2    | L |
| 2033 | EP300   | 4088   | SMAD3    | L |
| 2033 | EP300   | 4092   | SMAD7    | L |
| 2033 | EP300   | 4094   | MAF      | L |
| 2033 | EP300   | 4193   | MDM2     | L |
| 2033 | EP300   | 4194   | MDM4     | L |
| 2033 | EP300   | 4205   | MEF2A    | L |
| 2033 | EP300   | 4255   | MGMT     | L |
| 2033 | EP300   | 4435   | CITED1   | L |
| 2033 | EP300   | 4605   | MYBL2    | L |
| 2033 | EP300   | 4654   | MYOD1    | L |
| 2033 | EP300   | 4773   | NFATC2   | L |
| 2033 | EP300   | 4862   | NPAS2    | L |
| 2033 | EP300   | 5111   | PCNA     | L |
| 2033 | EP300   | 5467   | PPARD    | L |
| 2033 | EP300   | 5629   | PROX1    | L |
| 2033 | EP300   | 5757   | PTMA     | L |
| 2033 | EP300   | 5886   | RAD23A   | L |
| 2033 | EP300   | 5970   | RELA     | L |
| 2033 | EP300   | 6095   | RORA     | L |
| 2033 | EP300   | 6721   | SREBF2   | L |
| 2033 | EP300   | 6760   | SS18     | L |
| 2033 | EP300   | 6772   | STAT1    | L |

|      |         |        |        |   |
|------|---------|--------|--------|---|
| 2033 | EP300   | 6773   | STAT2  | L |
| 2033 | EP300   | 6774   | STAT3  | L |
| 2033 | EP300   | 6778   | STAT6  | L |
| 2033 | EP300   | 6886   | TAL1   | L |
| 2033 | EP300   | 6908   | TBP    | L |
| 2033 | EP300   | 6927   | TCF1   | L |
| 2033 | EP300   | 6929   | TCF3   | L |
| 2033 | EP300   | 6996   | TDG    | L |
| 2033 | EP300   | 7020   | TFAP2A | L |
| 2033 | EP300   | 7157   | TP53   | L |
| 2033 | EP300   | 7161   | TP73   | L |
| 2033 | EP300   | 7251   | TSG101 | L |
| 2033 | EP300   | 7291   | TWIST1 | L |
| 2033 | EP300   | 7329   | UBE2I  | L |
| 2033 | EP300   | 7392   | USF2   | L |
| 2033 | EP300   | 7528   | YY1    | L |
| 2033 | EP300   | 8092   | CART1  | L |
| 2033 | EP300   | 9325   | TRIP4  | L |
| 2033 | EP300   | 9406   | ZNF265 | L |
| 2033 | EP300   | 9464   | HAND2  | L |
| 2033 | EP300   | 9794   | MAML1  | L |
| 2033 | EP300   | 10370  | CITED2 | L |
| 2033 | EP300   | 10432  | RBM14  | L |
| 2033 | EP300   | 10474  | TADA3L | L |
| 2033 | EP300   | 10499  | NCOA2  | L |
| 2033 | EP300   | 10923  | SUB1   | L |
| 2033 | EP300   | 10980  | COPS6  | S |
| 2033 | EP300   | 23741  | CRI1   | L |
| 2033 | EP300   | 26039  | SS18L1 | L |
| 2033 | EP300   | 27043  | PELP1  | L |
| 2033 | EP300   | 51147  | ING4   | L |
| 2033 | EP300   | 51176  | LEF1   | L |
| 2033 | EP300   | 55728  | N4BP2  | L |
| 2033 | EP300   | 55809  | TRERF1 | L |
| 2033 | EP300   | 79753  | SNIP1  | L |
| 2033 | EP300   | 84289  | ING5   | L |
| 2033 | EP300   | 133746 | JMY    | L |
| 2033 | EP300   | 163732 | CITED4 | L |
| 2034 | EPAS1   | 4088   | SMAD3  | L |
| 2035 | EPB41   | 2038   | EPB42  | L |
| 2035 | EPB41   | 2995   | GYPC   | L |
| 2035 | EPB41   | 3838   | KPNA2  | L |
| 2035 | EPB41   | 4926   | NUMA1  | L |
| 2035 | EPB41   | 6521   | SLC4A1 | L |
| 2035 | EPB41   | 6709   | SPTAN1 | L |
| 2035 | EPB41   | 6710   | SPTB   | L |
| 2035 | EPB41   | 7307   | U2AF1  | L |
| 2035 | EPB41   | 8573   | CASK   | L |
| 2035 | EPB41   | 8666   | EIF3S4 | L |
| 2035 | EPB41   | 9414   | TJP2   | L |
| 2035 | EPB41   | 55835  | CENPJ  | L |
| 2036 | EPB41L1 | 2890   | GRIA1  | L |
| 2036 | EPB41L1 | 3708   | ITPR1  | L |
| 2036 | EPB41L1 | 4926   | NUMA1  | L |
| 2036 | EPB41L1 | 116986 | CENTG1 | L |
| 2037 | EPB41L2 | 2286   | FKBP2  | L |
| 2037 | EPB41L2 | 2890   | GRIA1  | L |
| 2037 | EPB41L2 | 4926   | NUMA1  | L |
| 2037 | EPB41L2 | 6709   | SPTAN1 | L |
| 2038 | EPB42   | 2039   | EPB49  | L |
| 2038 | EPB42   | 3845   | KRAS   | L |
| 2038 | EPB42   | 6522   | SLC4A2 | L |
| 2038 | EPB42   | 6709   | SPTAN1 | L |
| 2038 | EPB42   | 23673  | STX12  | L |
| 2039 | EPB49   | 6633   | SNRPD2 | S |
| 2039 | EPB49   | 6710   | SPTB   | L |
| 2039 | EPB49   | 10544  | PROCR  | S |

|      |       |        |           |    |
|------|-------|--------|-----------|----|
| 2039 | EPB49 | 53635  | PTOV1     | S  |
| 2040 | STOM  | 6513   | SLC2A1    | L  |
| 2040 | STOM  | 9311   | ACCN3     | L  |
| 2042 | EPHA3 | 55680  | RUFY2     | L  |
| 2043 | EPHA4 | 2534   | FYN       | L  |
| 2043 | EPHA4 | 22899  | ARHGEF15  | L  |
| 2043 | EPHA4 | 25791  | NGEF      | L  |
| 2045 | EPHA7 | 4301   | MLLT4     | L  |
| 2046 | EPHA8 | 2534   | FYN       | L  |
| 2046 | EPHA8 | 5294   | PIK3CG    | L  |
| 2047 | EPHB1 | 2051   | EPHB6     | L  |
| 2047 | EPHB1 | 2885   | GRB2      | L  |
| 2047 | EPHB1 | 2887   | GRB10     | L  |
| 2047 | EPHB1 | 4690   | NCK1      | L  |
| 2047 | EPHB1 | 5159   | PDGFRB    | L  |
| 2048 | EPHB2 | 4301   | MLLT4     | L  |
| 2048 | EPHB2 | 4690   | NCK1      | L  |
| 2048 | EPHB2 | 5921   | RASA1     | L  |
| 2048 | EPHB2 | 6259   | RYK       | L  |
| 2048 | EPHB2 | 6453   | ITSN1     | L  |
| 2048 | EPHB2 | 6714   | SRC       | L  |
| 2048 | EPHB2 | 6868   | ADAM17    | L  |
| 2049 | EPHB3 | 2534   | FYN       | L  |
| 2049 | EPHB3 | 4301   | MLLT4     | L  |
| 2049 | EPHB3 | 5921   | RASA1     | L  |
| 2049 | EPHB3 | 6259   | RYK       | L  |
| 2051 | EPHB6 | 4301   | MLLT4     | L  |
| 2051 | EPHB6 | 6303   | SAT       | S  |
| 2051 | EPHB6 | 307255 | (null)    | S  |
| 2053 | EPHX2 | 25934  | NIPSNAP3A | S  |
| 2056 | EPO   | 2057   | EPOR      | L  |
| 2056 | EPO   | 10399  | GNB2L1    | L  |
| 2057 | EPOR  | 2770   | GNAI1     | L  |
| 2057 | EPOR  | 2885   | GRB2      | L  |
| 2057 | EPOR  | 3717   | JAK2      | L  |
| 2057 | EPOR  | 3815   | KIT       | L  |
| 2057 | EPOR  | 4067   | LYN       | L  |
| 2057 | EPOR  | 4254   | KITLG     | L  |
| 2057 | EPOR  | 5295   | PIK3R1    | L  |
| 2057 | EPOR  | 5594   | MAPK1     | L  |
| 2057 | EPOR  | 5595   | MAPK3     | L  |
| 2057 | EPOR  | 5777   | PTPN6     | L  |
| 2057 | EPOR  | 5781   | PTPN11    | L  |
| 2057 | EPOR  | 6464   | SHC1      | L  |
| 2057 | EPOR  | 6776   | STAT5A    | L  |
| 2057 | EPOR  | 6850   | SYK       | L  |
| 2057 | EPOR  | 7409   | VAV1      | L  |
| 2057 | EPOR  | 8660   | IRS2      | L  |
| 2057 | EPOR  | 8835   | SOCS2     | L  |
| 2057 | EPOR  | 9021   | SOCS3     | L  |
| 2057 | EPOR  | 9846   | GAB2      | L  |
| 2057 | EPOR  | 10399  | GNB2L1    | L  |
| 2057 | EPOR  | 10750  | GRAP      | L  |
| 2057 | EPOR  | 11273  | ATXN2L    | L  |
| 2058 | EPRS  | 3320   | HSPCA     | L  |
| 2058 | EPRS  | 3376   | IARS      | L  |
| 2058 | EPRS  | 51497  | TH1L      | S  |
| 2059 | EPS8  | 5108   | PCM1      | R  |
| 2059 | EPS8  | 6461   | SHB       | L  |
| 2059 | EPS8  | 6464   | SHC1      | L  |
| 2059 | EPS8  | 6714   | SRC       | L  |
| 2059 | EPS8  | 7802   | DNALI1    | S  |
| 2059 | EPS8  | 7965   | JTV1      | R  |
| 2059 | EPS8  | 9712   | USP6NL    | L  |
| 2059 | EPS8  | 10006  | ABI1      | L  |
| 2059 | EPS8  | 10458  | BAIAP2    | RL |
| 2059 | EPS8  | 11007  | DIPA      | R  |

|      |       |       |         |   |
|------|-------|-------|---------|---|
| 2059 | EPS8  | 26258 | PLDN    | R |
| 2059 | EPS8  | 29911 | HOOK2   | R |
| 2059 | EPS8  | 51168 | MYO15A  | S |
| 2059 | EPS8  | 55052 | MRPL20  | S |
| 2060 | EPS15 | 3267  | HRB     | L |
| 2060 | EPS15 | 3268  | HRBL    | L |
| 2060 | EPS15 | 4734  | NEDD4   | L |
| 2060 | EPS15 | 6453  | ITSN1   | L |
| 2060 | EPS15 | 7805  | LAPTM5  | L |
| 2060 | EPS15 | 8650  | NUMB    | L |
| 2060 | EPS15 | 8867  | SYNJ1   | L |
| 2060 | EPS15 | 9146  | HGS     | L |
| 2060 | EPS15 | 9185  | REPS2   | L |
| 2060 | EPS15 | 9253  | NUMBL   | L |
| 2060 | EPS15 | 9892  | SNAP91  | L |
| 2060 | EPS15 | 10254 | STAM2   | L |
| 2060 | EPS15 | 22905 | EPN2    | L |
| 2060 | EPS15 | 23677 | SH3BP4  | L |
| 2060 | EPS15 | 26994 | RNF11   | L |
| 2060 | EPS15 | 29924 | EPN1    | L |
| 2060 | EPS15 | 51362 | CDC40   | L |
| 2060 | EPS15 | 85439 | STN2    | L |
| 2063 | NR2F6 | 2099  | ESR1    | L |
| 2063 | NR2F6 | 2908  | NR3C1   | L |
| 2063 | NR2F6 | 7026  | NR2F2   | L |
| 2063 | NR2F6 | 7068  | THRB    | L |
| 2063 | NR2F6 | 8648  | NCOA1   | L |
| 2063 | NR2F6 | 9068  | ANGPTL1 | L |
| 2064 | ERBB2 | 2065  | ERBB3   | L |
| 2064 | ERBB2 | 2185  | PTK2B   | L |
| 2064 | ERBB2 | 2885  | GRB2    | L |
| 2064 | ERBB2 | 2886  | GRB7    | L |
| 2064 | ERBB2 | 3084  | NRG1    | L |
| 2064 | ERBB2 | 3105  | HLA-A   | L |
| 2064 | ERBB2 | 3320  | HSPCA   | L |
| 2064 | ERBB2 | 3572  | IL6ST   | L |
| 2064 | ERBB2 | 3691  | ITGB4   | L |
| 2064 | ERBB2 | 3717  | JAK2    | L |
| 2064 | ERBB2 | 3728  | JUP     | L |
| 2064 | ERBB2 | 3732  | CD82    | L |
| 2064 | ERBB2 | 4145  | MATK    | L |
| 2064 | ERBB2 | 4582  | MUC1    | L |
| 2064 | ERBB2 | 5058  | PAK1    | L |
| 2064 | ERBB2 | 5295  | PIK3R1  | L |
| 2064 | ERBB2 | 5296  | PIK3R2  | L |
| 2064 | ERBB2 | 5335  | PLCG1   | L |
| 2064 | ERBB2 | 5747  | PTK2    | L |
| 2064 | ERBB2 | 6464  | SHC1    | L |
| 2064 | ERBB2 | 6654  | SOS1    | L |
| 2064 | ERBB2 | 6714  | SRC     | L |
| 2064 | ERBB2 | 10140 | TOB1    | L |
| 2064 | ERBB2 | 10273 | STUB1   | L |
| 2064 | ERBB2 | 54206 | ERRFI1  | L |
| 2064 | ERBB2 | 55914 | ERBB2IP | L |
| 2065 | ERBB3 | 2886  | GRB7    | L |
| 2065 | ERBB3 | 3084  | NRG1    | L |
| 2065 | ERBB3 | 3572  | IL6ST   | L |
| 2065 | ERBB3 | 3732  | CD82    | L |
| 2065 | ERBB3 | 4582  | MUC1    | L |
| 2065 | ERBB3 | 5036  | PA2G4   | L |
| 2065 | ERBB3 | 5295  | PIK3R1  | L |
| 2065 | ERBB3 | 5747  | PTK2    | L |
| 2065 | ERBB3 | 5753  | PTK6    | L |
| 2065 | ERBB3 | 5999  | RGS4    | L |
| 2065 | ERBB3 | 6464  | SHC1    | L |
| 2065 | ERBB3 | 6654  | SOS1    | L |
| 2065 | ERBB3 | 9542  | NRG2    | L |

|      |       |        |               |   |
|------|-------|--------|---------------|---|
| 2065 | ERBB3 | 10156  | RASA4         | S |
| 2065 | ERBB3 | 10728  | PTGES3        | L |
| 2065 | ERBB3 | 57489  | ODF2L         | S |
| 2065 | ERBB3 | 84256  | FLYWCH1       | S |
| 2066 | ERBB4 | 2069   | EREG          | L |
| 2066 | ERBB4 | 3084   | NRG1          | L |
| 2066 | ERBB4 | 4582   | MUC1          | L |
| 2066 | ERBB4 | 6645   | SNTB2         | L |
| 2066 | ERBB4 | 9542   | NRG2          | L |
| 2066 | ERBB4 | 10413  | YAP1          | L |
| 2067 | ERCC1 | 2072   | ERCC4         | L |
| 2067 | ERCC1 | 7507   | XPA           | L |
| 2067 | ERCC1 | 84993  | UBL7          | R |
| 2068 | ERCC2 | 2073   | ERCC5         | L |
| 2068 | ERCC2 | 2966   | GTF2H2        | L |
| 2068 | ERCC2 | 7157   | TP53          | L |
| 2068 | ERCC2 | 8878   | SQSTM1        | L |
| 2068 | ERCC2 | 404672 | GTF2H5        | L |
| 2071 | ERCC3 | 2960   | GTF2E1        | L |
| 2071 | ERCC3 | 2961   | GTF2E2        | L |
| 2071 | ERCC3 | 2965   | GTF2H1        | L |
| 2071 | ERCC3 | 2966   | GTF2H2        | L |
| 2071 | ERCC3 | 2967   | GTF2H3        | L |
| 2071 | ERCC3 | 2968   | GTF2H4        | L |
| 2071 | ERCC3 | 4331   | MNAT1         | L |
| 2071 | ERCC3 | 5705   | PSMC5         | L |
| 2071 | ERCC3 | 7157   | TP53          | L |
| 2071 | ERCC3 | 7508   | XPC           | L |
| 2071 | ERCC3 | 404672 | GTF2H5        | L |
| 2073 | ERCC5 | 2074   | ERCC6         | L |
| 2073 | ERCC5 | 2965   | GTF2H1        | L |
| 2073 | ERCC5 | 4913   | NTHL1         | L |
| 2073 | ERCC5 | 5111   | PCNA          | L |
| 2074 | ERCC6 | 2961   | GTF2E2        | L |
| 2074 | ERCC6 | 5430   | POLR2A        | L |
| 2074 | ERCC6 | 7157   | TP53          | L |
| 2074 | ERCC6 | 7507   | XPA           | L |
| 2074 | ERCC6 | 11200  | CHEK2         | L |
| 2074 | ERCC6 | 26994  | RNF11         | L |
| 2077 | ERF   | 7514   | XPO1          | L |
| 2078 | ERG   | 2114   | ETS2          | L |
| 2078 | ERG   | 2313   | FLI1          | L |
| 2078 | ERG   | 2353   | FOS           | L |
| 2078 | ERG   | 3725   | JUN           | L |
| 2079 | ERH   | 3312   | HSPA8         | S |
| 2079 | ERH   | 6456   | SH3GL2        | S |
| 2079 | ERH   | 7088   | TLE1          | S |
| 2079 | ERH   | 7157   | TP53          | S |
| 2079 | ERH   | 9094   | UNC119        | S |
| 2079 | ERH   | 9869   | SETDB1        | S |
| 2079 | ERH   | 10980  | COPS6         | S |
| 2079 | ERH   | 51003  | MED31         | S |
| 2079 | ERH   | 84060  | DKFZP564O0523 | S |
| 2079 | ERH   | 84966  | IGSF21        | S |
| 2081 | ERN1  | 3309   | HSPA5         | L |
| 2081 | ERN1  | 3320   | HSPCA         | L |
| 2081 | ERN1  | 4217   | MAP3K5        | L |
| 2081 | ERN1  | 5663   | PSEN1         | L |
| 2081 | ERN1  | 7186   | TRAF2         | L |
| 2091 | FBL   | 3276   | HRMT1L2       | L |
| 2091 | FBL   | 5303   | PIN4          | L |
| 2091 | FBL   | 5694   | PSMB6         | L |
| 2091 | FBL   | 6606   | SMN1          | L |
| 2091 | FBL   | 6638   | SNRPN         | L |
| 2091 | FBL   | 51602  | NOP5/NOP58    | L |
| 2091 | FBL   | 79735  | TBC1D17       | S |
| 2099 | ESR1  | 2100   | ESR2          | L |

|      |      |       |          |   |
|------|------|-------|----------|---|
| 2099 | ESR1 | 2308  | FOXO1A   | L |
| 2099 | ESR1 | 2647  | BLOC1S1  | L |
| 2099 | ESR1 | 2872  | MKNK2    | L |
| 2099 | ESR1 | 2965  | GTF2H1   | L |
| 2099 | ESR1 | 3275  | HRMT1L1  | L |
| 2099 | ESR1 | 3320  | HSPCA    | L |
| 2099 | ESR1 | 3326  | HSPCB    | L |
| 2099 | ESR1 | 3670  | ISL1     | L |
| 2099 | ESR1 | 3725  | JUN      | L |
| 2099 | ESR1 | 4087  | SMAD2    | L |
| 2099 | ESR1 | 4193  | MDM2     | L |
| 2099 | ESR1 | 4303  | MLLT7    | L |
| 2099 | ESR1 | 4331  | MNAT1    | L |
| 2099 | ESR1 | 4616  | GADD45B  | L |
| 2099 | ESR1 | 5295  | PIK3R1   | L |
| 2099 | ESR1 | 5458  | POU4F2   | L |
| 2099 | ESR1 | 5469  | PPARBP   | L |
| 2099 | ESR1 | 5594  | MAPK1    | L |
| 2099 | ESR1 | 5927  | JARID1A  | L |
| 2099 | ESR1 | 5992  | RFX4     | L |
| 2099 | ESR1 | 5998  | RGS3     | L |
| 2099 | ESR1 | 6294  | SAFB     | L |
| 2099 | ESR1 | 6464  | SHC1     | L |
| 2099 | ESR1 | 6595  | SMARCA2  | L |
| 2099 | ESR1 | 6597  | SMARCA4  | L |
| 2099 | ESR1 | 6605  | SMARCE1  | L |
| 2099 | ESR1 | 6776  | STAT5A   | L |
| 2099 | ESR1 | 6908  | TBP      | L |
| 2099 | ESR1 | 6996  | TDG      | L |
| 2099 | ESR1 | 7025  | NR2F1    | L |
| 2099 | ESR1 | 7157  | TP53     | L |
| 2099 | ESR1 | 7181  | NR2C1    | L |
| 2099 | ESR1 | 7182  | NR2C2    | L |
| 2099 | ESR1 | 7494  | XBP1     | L |
| 2099 | ESR1 | 7533  | YWHAH    | L |
| 2099 | ESR1 | 7704  | ZBTB16   | L |
| 2099 | ESR1 | 7799  | PRDM2    | L |
| 2099 | ESR1 | 8202  | NCOA3    | L |
| 2099 | ESR1 | 8204  | NRIP1    | L |
| 2099 | ESR1 | 8431  | NR0B2    | L |
| 2099 | ESR1 | 8648  | NCOA1    | L |
| 2099 | ESR1 | 8668  | EIF3S2   | L |
| 2099 | ESR1 | 8805  | TRIM24   | L |
| 2099 | ESR1 | 9112  | MTA1     | L |
| 2099 | ESR1 | 9325  | TRIP4    | L |
| 2099 | ESR1 | 9584  | RNPC2    | L |
| 2099 | ESR1 | 9604  | RNF14    | L |
| 2099 | ESR1 | 9611  | NCOR1    | L |
| 2099 | ESR1 | 9612  | NCOR2    | L |
| 2099 | ESR1 | 9862  | THRAP4   | L |
| 2099 | ESR1 | 9961  | MVP      | L |
| 2099 | ESR1 | 10474 | TADA3L   | L |
| 2099 | ESR1 | 10499 | NCOA2    | L |
| 2099 | ESR1 | 10728 | PTGES3   | L |
| 2099 | ESR1 | 10891 | PPARGC1A | L |
| 2099 | ESR1 | 10912 | GADD45G  | L |
| 2099 | ESR1 | 11214 | AKAP13   | L |
| 2099 | ESR1 | 11331 | PHB2     | L |
| 2099 | ESR1 | 24148 | C20orf14 | L |
| 2099 | ESR1 | 25920 | COBRA1   | L |
| 2099 | ESR1 | 27043 | PELP1    | L |
| 2099 | ESR1 | 29931 | LOH3CR2A | L |
| 2099 | ESR1 | 30836 | ERBP     | L |
| 2099 | ESR1 | 55629 | PNRC2    | L |
| 2099 | ESR1 | 56924 | PAK6     | L |
| 2099 | ESR1 | 57109 | REXO4    | L |
| 2099 | ESR1 | 64324 | NSD1     | L |

|      |       |        |          |   |
|------|-------|--------|----------|---|
| 2099 | ESR1  | 84172  | POLR1B   | L |
| 2099 | ESR1  | 133522 | PPARGC1B | L |
| 2100 | ESR2  | 2872   | MKNK2    | L |
| 2100 | ESR2  | 4085   | MAD2L1   | L |
| 2100 | ESR2  | 5020   | OXT      | L |
| 2100 | ESR2  | 5469   | PPARBP   | L |
| 2100 | ESR2  | 6605   | SMARCE1  | L |
| 2100 | ESR2  | 6776   | STAT5A   | L |
| 2100 | ESR2  | 7533   | YWHAH    | L |
| 2100 | ESR2  | 8202   | NCOA3    | L |
| 2100 | ESR2  | 8431   | NR0B2    | L |
| 2100 | ESR2  | 8648   | NCOA1    | L |
| 2100 | ESR2  | 8805   | TRIM24   | L |
| 2100 | ESR2  | 9584   | RNPC2    | L |
| 2100 | ESR2  | 23054  | NCOA6    | L |
| 2100 | ESR2  | 27043  | PELP1    | L |
| 2100 | ESR2  | 30836  | ERBP     | L |
| 2100 | ESR2  | 57109  | REXO4    | L |
| 2101 | ESRRA | 8648   | NCOA1    | L |
| 2101 | ESRRA | 55629  | PNRC2    | L |
| 2101 | ESRRA | 118460 | EXOSC6   | L |
| 2103 | ESRRB | 8202   | NCOA3    | L |
| 2103 | ESRRB | 10499  | NCOA2    | L |
| 2104 | ESRRG | 8648   | NCOA1    | L |
| 2104 | ESRRG | 10891  | PPARGC1A | L |
| 2104 | ESRRG | 133522 | PPARGC1B | L |
| 2107 | ETF1  | 2935   | GSPT1    | L |
| 2107 | ETF1  | 9817   | KEAP1    | R |
| 2107 | ETF1  | 23708  | GSPT2    | L |
| 2108 | ETFA  | 2109   | ETFB     | L |
| 2113 | ETS1  | 2114   | ETS2     | L |
| 2113 | ETS1  | 2353   | FOS      | L |
| 2113 | ETS1  | 2625   | GATA3    | L |
| 2113 | ETS1  | 2908   | NR3C1    | L |
| 2113 | ETS1  | 3725   | JUN      | L |
| 2113 | ETS1  | 4094   | MAF      | L |
| 2113 | ETS1  | 4790   | NFKB1    | L |
| 2113 | ETS1  | 5079   | PAX5     | L |
| 2113 | ETS1  | 6672   | SP100    | L |
| 2113 | ETS1  | 7329   | UBE2I    | L |
| 2113 | ETS1  | 51567  | TTRAP    | L |
| 2114 | ETS2  | 2625   | GATA3    | L |
| 2114 | ETS2  | 2908   | NR3C1    | L |
| 2114 | ETS2  | 3725   | JUN      | L |
| 2114 | ETS2  | 8558   | CDK10    | L |
| 2114 | ETS2  | 9372   | ZFYVE9   | L |
| 2114 | ETS2  | 10771  | ZMYND11  | L |
| 2115 | ETV1  | 6195   | RPS6KA1  | L |
| 2115 | ETV1  | 8202   | NCOA3    | L |
| 2120 | ETV6  | 7329   | UBE2I    | L |
| 2120 | ETV6  | 7341   | SUMO1    | L |
| 2122 | EVI1  | 3065   | HDAC1    | L |
| 2122 | EVI1  | 4088   | SMAD3    | L |
| 2122 | EVI1  | 8850   | PCAF     | L |
| 2122 | EVI1  | 9759   | HDAC4    | L |
| 2125 | EVPL  | 3713   | IVL      | L |
| 2125 | EVPL  | 3848   | KRT1     | L |
| 2125 | EVPL  | 3849   | KRT2A    | L |
| 2125 | EVPL  | 3852   | KRT5     | L |
| 2125 | EVPL  | 3858   | KRT10    | L |
| 2125 | EVPL  | 5493   | PPL      | L |
| 2125 | EVPL  | 6707   | SPRR3    | L |
| 2130 | EWSR1 | 2185   | PTK2B    | L |
| 2130 | EWSR1 | 2194   | FASN     | R |
| 2130 | EWSR1 | 3159   | HMGA1    | R |
| 2130 | EWSR1 | 3779   | KCNMB1   | R |
| 2130 | EWSR1 | 3792   | KEL      | R |



|      |       |       |          |   |
|------|-------|-------|----------|---|
| 2130 | EWSR1 | 4086  | SMAD1    | L |
| 2130 | EWSR1 | 4089  | SMAD4    | R |
| 2130 | EWSR1 | 4110  | MAGEA11  | R |
| 2130 | EWSR1 | 4145  | MATK     | R |
| 2130 | EWSR1 | 4188  | MDFI     | R |
| 2130 | EWSR1 | 4515  | MTCP1    | R |
| 2130 | EWSR1 | 4542  | MYO1F    | R |
| 2130 | EWSR1 | 4591  | TRIM37   | R |
| 2130 | EWSR1 | 4598  | MVK      | R |
| 2130 | EWSR1 | 4637  | MYL6     | R |
| 2130 | EWSR1 | 4707  | NDUFB1   | R |
| 2130 | EWSR1 | 4723  | NDUFV1   | R |
| 2130 | EWSR1 | 4879  | NPPB     | R |
| 2130 | EWSR1 | 5359  | PLSCR1   | R |
| 2130 | EWSR1 | 5457  | POU4F1   | L |
| 2130 | EWSR1 | 5829  | PXN      | L |
| 2130 | EWSR1 | 5886  | RAD23A   | R |
| 2130 | EWSR1 | 6160  | RPL31    | R |
| 2130 | EWSR1 | 6210  | RPS15A   | R |
| 2130 | EWSR1 | 6297  | SALL2    | R |
| 2130 | EWSR1 | 6505  | SLC1A1   | R |
| 2130 | EWSR1 | 6631  | SNRPC    | L |
| 2130 | EWSR1 | 6872  | TAF1     | L |
| 2130 | EWSR1 | 6944  | VPS72    | R |
| 2130 | EWSR1 | 7094  | TLN1     | L |
| 2130 | EWSR1 | 7288  | TULP2    | R |
| 2130 | EWSR1 | 7536  | SF1      | L |
| 2130 | EWSR1 | 7718  | ZNF165   | R |
| 2130 | EWSR1 | 8050  | PDHX     | R |
| 2130 | EWSR1 | 9087  | TMSB4Y   | R |
| 2130 | EWSR1 | 9242  | MSC      | R |
| 2130 | EWSR1 | 9709  | HERPUD1  | R |
| 2130 | EWSR1 | 10007 | GNPDA1   | R |
| 2130 | EWSR1 | 10099 | TSPAN3   | R |
| 2130 | EWSR1 | 10428 | CFDP1    | R |
| 2130 | EWSR1 | 11026 | LILRA3   | R |
| 2130 | EWSR1 | 11030 | RBPMS    | R |
| 2130 | EWSR1 | 11052 | CPSF6    | R |
| 2130 | EWSR1 | 11059 | WWP1     | R |
| 2130 | EWSR1 | 11060 | WWP2     | R |
| 2130 | EWSR1 | 11103 | HRB2     | R |
| 2130 | EWSR1 | 22884 | WDR37    | R |
| 2130 | EWSR1 | 22981 | KIAA0980 | R |
| 2130 | EWSR1 | 23635 | SSBP2    | R |
| 2130 | EWSR1 | 25796 | PGLS     | R |
| 2130 | EWSR1 | 25941 | C18orf10 | R |
| 2130 | EWSR1 | 26148 | C10orf12 | R |
| 2130 | EWSR1 | 27104 | (null)   | R |
| 2130 | EWSR1 | 28973 | MRPS18B  | R |
| 2130 | EWSR1 | 51304 | ZDHHC3   | R |
| 2130 | EWSR1 | 51778 | MYOZ2    | R |
| 2130 | EWSR1 | 54475 | NLE1     | R |
| 2130 | EWSR1 | 55249 | YY1AP1   | R |
| 2130 | EWSR1 | 55297 | FLJ11088 | R |
| 2130 | EWSR1 | 55329 | MNS1     | R |
| 2130 | EWSR1 | 56302 | TRPV5    | R |
| 2130 | EWSR1 | 56673 | C11orf16 | R |
| 2130 | EWSR1 | 56952 | PRTFDC1  | R |
| 2130 | EWSR1 | 57126 | CD177    | R |
| 2130 | EWSR1 | 60313 | GPBP1L1  | R |
| 2130 | EWSR1 | 63948 | DMRTB1   | R |
| 2130 | EWSR1 | 64777 | FLJ22318 | R |
| 2130 | EWSR1 | 65997 | RASL11B  | R |
| 2130 | EWSR1 | 66036 | MTMR9    | R |
| 2130 | EWSR1 | 79004 | CUEDC2   | R |
| 2130 | EWSR1 | 79036 | MGC2749  | R |
| 2130 | EWSR1 | 79173 | MGC11271 | R |

|      |       |        |           |   |
|------|-------|--------|-----------|---|
| 2130 | EWSR1 | 79723  | SUV39H2   | R |
| 2130 | EWSR1 | 79869  | FLJ12529  | R |
| 2130 | EWSR1 | 84224  | AE2       | R |
| 2130 | EWSR1 | 84528  | PEPP-2    | R |
| 2130 | EWSR1 | 84628  | NTNG2     | R |
| 2130 | EWSR1 | 85465  | SELI      | R |
| 2130 | EWSR1 | 93487  | C14orf32  | R |
| 2130 | EWSR1 | 138046 | LOC138046 | R |
| 2130 | EWSR1 | 138065 | RNF183    | R |
| 2130 | EWSR1 | 140735 | Dlc2      | R |
| 2130 | EWSR1 | 158471 | C9orf65   | R |
| 2130 | EWSR1 | 163882 | C1orf71   | R |
| 2130 | EWSR1 | 202559 | KHDRBS2   | R |
| 2130 | EWSR1 | 221016 | CCDC7     | R |
| 2130 | EWSR1 | 283238 | MGC34821  | R |
| 2130 | EWSR1 | 326624 | RAB37     | R |
| 2130 | EWSR1 | 348487 | C1orf117  | R |
| 2130 | EWSR1 | 387338 | NSUN4     | R |
| 2130 | EWSR1 | 387923 | C13orf21  | R |
| 2130 | EWSR1 | 414061 | HCG3      | R |
| 2131 | EXT1  | 2132   | EXT2      | L |
| 2131 | EXT1  | 10131  | TRAP1     | L |
| 2132 | EXT2  | 10131  | TRAP1     | L |
| 2132 | EXT2  | 11227  | GALNT5    | L |
| 2138 | EYA1  | 6495   | SIX1      | L |
| 2138 | EYA1  | 6496   | SIX3      | L |
| 2139 | EYA2  | 2771   | GNAI2     | L |
| 2139 | EYA2  | 2781   | GNAZ      | L |
| 2139 | EYA2  | 6495   | SIX1      | L |
| 2139 | EYA2  | 11030  | RBPMS     | R |
| 2139 | EYA2  | 51804  | SIX4      | L |
| 2139 | EYA2  | 63948  | DMRTB1    | R |
| 2140 | EYA3  | 6495   | SIX1      | L |
| 2140 | EYA3  | 10736  | SIX2      | L |
| 2140 | EYA3  | 51804  | SIX4      | L |
| 2140 | EYA3  | 147912 | SIX5      | L |
| 2145 | EZH1  | 8726   | EED       | L |
| 2146 | EZH2  | 2975   | GTF3C1    | S |
| 2146 | EZH2  | 3065   | HDAC1     | L |
| 2146 | EZH2  | 5252   | PHF1      | L |
| 2146 | EZH2  | 5303   | PIN4      | S |
| 2146 | EZH2  | 5694   | PSMB6     | S |
| 2146 | EZH2  | 6185   | RPN2      | S |
| 2146 | EZH2  | 6611   | SMS       | S |
| 2146 | EZH2  | 7409   | VAV1      | L |
| 2146 | EZH2  | 8726   | EED       | L |
| 2146 | EZH2  | 11007  | DIPA      | R |
| 2146 | EZH2  | 22981  | KIAA0980  | S |
| 2146 | EZH2  | 23588  | KLHDC2    | S |
| 2146 | EZH2  | 23649  | POLA2     | S |
| 2146 | EZH2  | 55884  | WSB2      | S |
| 2146 | EZH2  | 80349  | WDR61     | S |
| 2147 | F2    | 2151   | F2RL2     | L |
| 2147 | F2    | 2153   | F5        | L |
| 2147 | F2    | 2158   | F9        | L |
| 2147 | F2    | 2160   | F11       | L |
| 2147 | F2    | 2243   | FGA       | L |
| 2147 | F2    | 2811   | GP1BA     | L |
| 2147 | F2    | 3053   | SERPIND1  | L |
| 2147 | F2    | 3674   | ITGA2B    | L |
| 2147 | F2    | 3678   | ITGA5     | L |
| 2147 | F2    | 3827   | KNG1      | L |
| 2147 | F2    | 5054   | SERPINE1  | L |
| 2147 | F2    | 5104   | SERPINA5  | L |
| 2147 | F2    | 5269   | SERPINE6  | L |
| 2147 | F2    | 5270   | SERPINE2  | L |
| 2147 | F2    | 5271   | SERPINE8  | L |

|      |       |       |          |   |
|------|-------|-------|----------|---|
| 2147 | F2    | 5624  | PROC     | L |
| 2147 | F2    | 7056  | THBD     | L |
| 2147 | F2    | 7057  | THBS1    | L |
| 2147 | F2    | 9002  | F2RL3    | L |
| 2149 | F2R   | 2172  | FABP6    | L |
| 2149 | F2R   | 2768  | GNA12    | L |
| 2149 | F2R   | 2769  | GNA15    | L |
| 2149 | F2R   | 2771  | GNAI2    | L |
| 2149 | F2R   | 3685  | ITGAV    | L |
| 2149 | F2R   | 6642  | SNX1     | L |
| 2149 | F2R   | 10672 | GNA13    | L |
| 2150 | F2RL1 | 6768  | ST14     | L |
| 2151 | F2RL2 | 58494 | JAM2     | L |
| 2151 | F2RL2 | 83700 | JAM3     | L |
| 2152 | F3    | 2155  | F7       | L |
| 2152 | F3    | 2159  | F10      | L |
| 2152 | F3    | 2316  | FLNA     | L |
| 2152 | F3    | 5340  | PLG      | L |
| 2153 | F5    | 2159  | F10      | L |
| 2153 | F5    | 5624  | PROC     | L |
| 2153 | F5    | 5627  | PROS1    | L |
| 2153 | F5    | 8475  | EPR1     | L |
| 2155 | F7    | 2158  | F9       | L |
| 2155 | F7    | 2159  | F10      | L |
| 2157 | F8    | 2158  | F9       | L |
| 2157 | F8    | 2159  | F10      | L |
| 2157 | F8    | 3309  | HSPA5    | L |
| 2157 | F8    | 3998  | LMAN1    | L |
| 2157 | F8    | 4035  | LRP1     | L |
| 2157 | F8    | 5264  | PHYH     | L |
| 2157 | F8    | 5624  | PROC     | L |
| 2157 | F8    | 5627  | PROS1    | L |
| 2157 | F8    | 7450  | VWF      | L |
| 2158 | F9    | 4035  | LRP1     | L |
| 2159 | F10   | 3006  | HIST1H1C | S |
| 2159 | F10   | 4259  | MGST3    | S |
| 2159 | F10   | 5104  | SERPINA5 | L |
| 2159 | F10   | 5269  | SERPINB6 | L |
| 2159 | F10   | 5271  | SERPINB8 | L |
| 2159 | F10   | 5327  | PLAT     | L |
| 2159 | F10   | 5340  | PLG      | L |
| 2159 | F10   | 5564  | PRKAB1   | S |
| 2159 | F10   | 5627  | PROS1    | L |
| 2159 | F10   | 7035  | TFPI     | L |
| 2160 | F11   | 2811  | GP1BA    | L |
| 2160 | F11   | 3827  | KNG1     | L |
| 2160 | F11   | 5104  | SERPINA5 | L |
| 2160 | F11   | 5345  | SERPINF2 | L |
| 2160 | F11   | 7980  | TFPI2    | L |
| 2161 | F12   | 2811  | GP1BA    | L |
| 2161 | F12   | 3848  | KRT1     | L |
| 2161 | F12   | 22918 | C1QR1    | L |
| 2162 | F13A1 | 2165  | F13B     | L |
| 2162 | F13A1 | 2243  | FGA      | L |
| 2162 | F13A1 | 2266  | FGG      | L |
| 2162 | F13A1 | 2335  | FN1      | L |
| 2165 | F13B  | 2266  | FGG      | L |
| 2166 | FAAH  | 5829  | PXN      | L |
| 2167 | FABP4 | 3991  | LIPE     | L |
| 2167 | FABP4 | 7431  | VIM      | S |
| 2168 | FABP1 | 5465  | PPARA    | L |
| 2168 | FABP1 | 5468  | PPARG    | L |
| 2170 | FABP3 | 51160 | VPS28    | S |
| 2171 | FABP5 | 6278  | S100A7   | L |
| 2175 | FANCA | 2176  | FANCC    | L |
| 2175 | FANCA | 2178  | FANCE    | L |
| 2175 | FANCA | 2188  | FANCF    | L |

|      |        |        |         |    |
|------|--------|--------|---------|----|
| 2175 | FANCA  | 2189   | FANCG   | RL |
| 2175 | FANCA  | 3551   | IKBKB   | L  |
| 2175 | FANCA  | 6597   | SMARCA4 | L  |
| 2175 | FANCA  | 6599   | SMARCC1 | L  |
| 2175 | FANCA  | 6604   | SMARCD3 | L  |
| 2175 | FANCA  | 27131  | SNX5    | L  |
| 2176 | FANCC  | 2177   | FANCD2  | L  |
| 2176 | FANCC  | 2178   | FANCE   | L  |
| 2176 | FANCC  | 2188   | FANCF   | L  |
| 2176 | FANCC  | 2189   | FANCG   | L  |
| 2176 | FANCC  | 3303   | HSPA1A  | L  |
| 2176 | FANCC  | 6708   | SPTA1   | L  |
| 2176 | FANCC  | 7184   | TRA1    | L  |
| 2177 | FANCD2 | 2178   | FANCE   | L  |
| 2177 | FANCD2 | 5888   | RAD51   | L  |
| 2178 | FANCE  | 2189   | FANCG   | L  |
| 2185 | PTK2B  | 2885   | GRB2    | L  |
| 2185 | PTK2B  | 2903   | GRIN2A  | L  |
| 2185 | PTK2B  | 2934   | GSN     | L  |
| 2185 | PTK2B  | 3689   | ITGB2   | L  |
| 2185 | PTK2B  | 3690   | ITGB3   | L  |
| 2185 | PTK2B  | 3716   | JAK1    | L  |
| 2185 | PTK2B  | 3717   | JAK2    | L  |
| 2185 | PTK2B  | 3718   | JAK3    | L  |
| 2185 | PTK2B  | 3737   | KCNA2   | L  |
| 2185 | PTK2B  | 3932   | LCK     | L  |
| 2185 | PTK2B  | 4067   | LYN     | L  |
| 2185 | PTK2B  | 4145   | MATK    | L  |
| 2185 | PTK2B  | 4162   | MCAM    | L  |
| 2185 | PTK2B  | 4867   | NPHP1   | L  |
| 2185 | PTK2B  | 5295   | PIK3R1  | L  |
| 2185 | PTK2B  | 5580   | PRKCD   | L  |
| 2185 | PTK2B  | 5777   | PTPN6   | L  |
| 2185 | PTK2B  | 5781   | PTPN11  | L  |
| 2185 | PTK2B  | 5782   | PTPN12  | L  |
| 2185 | PTK2B  | 5829   | PXN     | L  |
| 2185 | PTK2B  | 5921   | RASA1   | L  |
| 2185 | PTK2B  | 6464   | SHC1    | L  |
| 2185 | PTK2B  | 6513   | SLC2A1  | L  |
| 2185 | PTK2B  | 6714   | SRC     | L  |
| 2185 | PTK2B  | 6850   | SYK     | L  |
| 2185 | PTK2B  | 7041   | TGFB111 | L  |
| 2185 | PTK2B  | 7094   | TLN1    | L  |
| 2185 | PTK2B  | 7409   | VAV1    | L  |
| 2185 | PTK2B  | 7535   | ZAP70   | L  |
| 2185 | PTK2B  | 8853   | DDEF2   | L  |
| 2185 | PTK2B  | 9404   | LPXN    | L  |
| 2185 | PTK2B  | 9564   | BCAR1   | L  |
| 2185 | PTK2B  | 9600   | PITPNM1 | L  |
| 2185 | PTK2B  | 10278  | EFS     | L  |
| 2185 | PTK2B  | 10672  | GNA13   | L  |
| 2185 | PTK2B  | 57605  | PITPNM2 | L  |
| 2185 | PTK2B  | 83394  | PITPNM3 | L  |
| 2186 | FALZ   | 4150   | MAZ     | L  |
| 2188 | FANCF  | 2189   | FANCG   | L  |
| 2188 | FANCF  | 4140   | MARK3   | S  |
| 2188 | FANCF  | 93145  | OLFM2   | S  |
| 2189 | FANCG  | 2553   | GABPB2  | R  |
| 2189 | FANCG  | 3880   | KRT19   | R  |
| 2189 | FANCG  | 9189   | ZBED1   | R  |
| 2189 | FANCG  | 83878  | USHBP1  | R  |
| 2189 | FANCG  | 154075 | SAMD3   | R  |
| 2191 | FAP    | 5329   | PLAUR   | L  |
| 2192 | FBLN1  | 2244   | FGB     | L  |
| 2192 | FBLN1  | 2335   | FN1     | L  |
| 2192 | FBLN1  | 3339   | HSPG2   | L  |
| 2192 | FBLN1  | 4089   | SMAD4   | L  |

|      |        |        |           |   |
|------|--------|--------|-----------|---|
| 2192 | FBLN1  | 4856   | NOV       | L |
| 2192 | FBLN1  | 6498   | SKIL      | L |
| 2192 | FBLN1  | 8076   | MFAP5     | L |
| 2193 | FARSLA | 10236  | HNRPR     | S |
| 2197 | FAU    | 5829   | PXN       | L |
| 2197 | FAU    | 10980  | COPS6     | S |
| 2199 | FBLN2  | 2200   | FBN1      | L |
| 2199 | FBLN2  | 2335   | FN1       | L |
| 2199 | FBLN2  | 3339   | HSPG2     | L |
| 2199 | FBLN2  | 3911   | LAMA5     | L |
| 2199 | FBLN2  | 4811   | NID1      | L |
| 2199 | FBLN2  | 5549   | PRELP     | L |
| 2199 | FBLN2  | 63827  | BCAN      | L |
| 2199 | FBLN2  | 80781  | COL18A1   | L |
| 2199 | FBLN2  | 284217 | LAMA1     | L |
| 2200 | FBN1   | 2201   | FBN2      | L |
| 2200 | FBN1   | 4237   | MFAP2     | L |
| 2200 | FBN1   | 4653   | MYOC      | L |
| 2200 | FBN1   | 8076   | MFAP5     | L |
| 2201 | FBN2   | 4087   | SMAD2     | L |
| 2201 | FBN2   | 4147   | MATN2     | L |
| 2201 | FBN2   | 8076   | MFAP5     | L |
| 2202 | EFEMP1 | 4089   | SMAD4     | L |
| 2202 | EFEMP1 | 6449   | SGTA      | R |
| 2203 | FBP1   | 3312   | HSPA8     | S |
| 2203 | FBP1   | 9513   | FXR2      | R |
| 2203 | FBP1   | 9551   | ATP5J2    | S |
| 2203 | FBP1   | 64430  | C14orf135 | R |
| 2203 | FBP1   | 84164  | ASCC2     | S |
| 2203 | FBP1   | 84708  | LNX       | R |
| 2203 | FBP1   | 138065 | RNF183    | R |
| 2204 | FCAR   | 2209   | FCGR1A    | L |
| 2204 | FCAR   | 4067   | LYN       | L |
| 2205 | FCER1A | 2206   | MS4A2     | L |
| 2205 | FCER1A | 2207   | FCER1G    | L |
| 2205 | FCER1A | 3497   | IGHE      | L |
| 2206 | MS4A2  | 4067   | LYN       | L |
| 2206 | MS4A2  | 6850   | SYK       | L |
| 2207 | FCER1G | 4067   | LYN       | L |
| 2207 | FCER1G | 5336   | PLCG2     | L |
| 2207 | FCER1G | 6850   | SYK       | L |
| 2207 | FCER1G | 9437   | NCR1      | L |
| 2207 | FCER1G | 51206  | GP6       | L |
| 2208 | FCER2  | 2534   | FYN       | L |
| 2208 | FCER2  | 3687   | ITGAX     | L |
| 2209 | FCGR1A | 2214   | FCGR3A    | L |
| 2209 | FCGR1A | 3055   | HCK       | L |
| 2209 | FCGR1A | 3273   | HRG       | L |
| 2209 | FCGR1A | 6850   | SYK       | L |
| 2209 | FCGR1A | 27040  | LAT       | L |
| 2212 | FCGR2A | 3055   | HCK       | L |
| 2212 | FCGR2A | 3958   | LGALS3    | L |
| 2212 | FCGR2A | 5295   | PIK3R1    | L |
| 2212 | FCGR2A | 6464   | SHC1      | L |
| 2212 | FCGR2A | 27040  | LAT       | L |
| 2213 | FCGR2B | 3636   | INPPL1    | L |
| 2213 | FCGR2B | 4061   | LY6E      | L |
| 2213 | FCGR2B | 5777   | PTPN6     | L |
| 2213 | FCGR2B | 11161  | C14orf1   | S |
| 2214 | FCGR3A | 3932   | LCK       | L |
| 2214 | FCGR3A | 5788   | PTPRC     | L |
| 2214 | FCGR3A | 6464   | SHC1      | L |
| 2214 | FCGR3A | 7535   | ZAP70     | L |
| 2215 | FCGR3B | 3500   | IGHG1     | L |
| 2219 | FCN1   | 7040   | TGFB1     | L |
| 2220 | FCN2   | 5648   | MASP1     | L |
| 2220 | FCN2   | 10747  | MASP2     | L |

|      |       |        |          |   |
|------|-------|--------|----------|---|
| 2222 | FDFT1 | 10856  | RUVBL2   | S |
| 2222 | FDFT1 | 23204  | ARL6IP   | S |
| 2222 | FDFT1 | 73121  | (null)   | S |
| 2222 | FDFT1 | 79188  | TMEM43   | S |
| 2222 | FDFT1 | 257218 | SHPRH    | S |
| 2224 | FDPS  | 2260   | FGFR1    | L |
| 2230 | FDX1  | 2232   | FDXR     | L |
| 2230 | FDX1  | 54205  | CYCS     | L |
| 2237 | FEN1  | 3178   | HNRPA1   | L |
| 2237 | FEN1  | 5111   | PCNA     | L |
| 2237 | FEN1  | 7414   | VCL      | L |
| 2237 | FEN1  | 7486   | WRN      | L |
| 2239 | GPC4  | 2247   | FGF2     | L |
| 2239 | GPC4  | 80781  | COL18A1  | L |
| 2241 | FER   | 6774   | STAT3    | L |
| 2241 | FER   | 7110   | TMF1     | L |
| 2242 | FES   | 3566   | IL4R     | L |
| 2242 | FES   | 5295   | PIK3R1   | L |
| 2242 | FES   | 5921   | RASA1    | L |
| 2242 | FES   | 6774   | STAT3    | L |
| 2242 | FES   | 9564   | BCAR1    | L |
| 2242 | FES   | 22821  | RASA3    | L |
| 2242 | FES   | 56896  | DPYSL5   | L |
| 2243 | FGA   | 2244   | FGB      | L |
| 2243 | FGA   | 2266   | FGG      | L |
| 2243 | FGA   | 3273   | HRG      | L |
| 2243 | FGA   | 3674   | ITGA2B   | L |
| 2243 | FGA   | 3690   | ITGB3    | L |
| 2243 | FGA   | 4811   | NID1     | L |
| 2243 | FGA   | 5104   | SERPINA5 | L |
| 2243 | FGA   | 5327   | PLAT     | L |
| 2243 | FGA   | 7057   | THBS1    | L |
| 2243 | FGA   | 7916   | BAT2     | L |
| 2244 | FGB   | 2266   | FGG      | L |
| 2244 | FGB   | 4018   | LPA      | L |
| 2244 | FGB   | 4811   | NID1     | L |
| 2244 | FGB   | 5104   | SERPINA5 | L |
| 2246 | FGF1  | 2260   | FGFR1    | L |
| 2246 | FGF1  | 2261   | FGFR3    | L |
| 2246 | FGF1  | 2263   | FGFR2    | L |
| 2246 | FGF1  | 2264   | FGFR4    | L |
| 2246 | FGF1  | 3313   | HSPA9B   | L |
| 2246 | FGF1  | 6284   | S100A13  | L |
| 2246 | FGF1  | 6857   | SYT1     | L |
| 2246 | FGF1  | 9158   | FIBP     | L |
| 2246 | FGF1  | 9982   | FGFBP1   | L |
| 2247 | FGF2  | 2260   | FGFR1    | L |
| 2247 | FGF2  | 2263   | FGFR2    | L |
| 2247 | FGF2  | 2264   | FGFR4    | L |
| 2247 | FGF2  | 2719   | GPC3     | L |
| 2247 | FGF2  | 3339   | HSPG2    | L |
| 2247 | FGF2  | 5196   | PF4      | L |
| 2247 | FGF2  | 6128   | RPL6     | L |
| 2247 | FGF2  | 6223   | RPS19    | L |
| 2247 | FGF2  | 7448   | VTN      | L |
| 2247 | FGF2  | 9672   | SDC3     | L |
| 2247 | FGF2  | 9982   | FGFBP1   | L |
| 2247 | FGF2  | 10563  | CXCL13   | L |
| 2248 | FGF3  | 2263   | FGFR2    | L |
| 2250 | FGF5  | 2260   | FGFR1    | L |
| 2250 | FGF5  | 2263   | FGFR2    | L |
| 2250 | FGF5  | 7039   | TGFA     | L |
| 2250 | FGF5  | 7422   | VEGF     | L |
| 2251 | FGF6  | 2264   | FGFR4    | L |
| 2252 | FGF7  | 2263   | FGFR2    | L |
| 2252 | FGF7  | 3339   | HSPG2    | L |
| 2253 | FGF8  | 2261   | FGFR3    | L |

|      |       |        |          |   |
|------|-------|--------|----------|---|
| 2253 | FGF8  | 2264   | FGFR4    | L |
| 2254 | FGF9  | 2261   | FGFR3    | L |
| 2254 | FGF9  | 2263   | FGFR2    | L |
| 2255 | FGF10 | 2263   | FGFR2    | L |
| 2257 | FGF12 | 23542  | MAPK8IP2 | L |
| 2258 | FGF13 | 23542  | MAPK8IP2 | L |
| 2260 | FGFR1 | 2885   | GRB2     | L |
| 2260 | FGFR1 | 2888   | GRB14    | L |
| 2260 | FGFR1 | 3837   | KPNB1    | L |
| 2260 | FGFR1 | 4684   | NCAM1    | L |
| 2260 | FGFR1 | 6461   | SHB      | L |
| 2260 | FGFR1 | 6464   | SHC1     | L |
| 2260 | FGFR1 | 10817  | FRS3     | L |
| 2260 | FGFR1 | 10818  | FRS2     | L |
| 2261 | FGFR3 | 2885   | GRB2     | L |
| 2261 | FGFR3 | 2975   | GTF3C1   | S |
| 2261 | FGFR3 | 3050   | HBZ      | S |
| 2261 | FGFR3 | 3191   | HNRPL    | S |
| 2261 | FGFR3 | 3856   | KRT8     | S |
| 2261 | FGFR3 | 4726   | NDUFS6   | S |
| 2261 | FGFR3 | 5781   | PTPN11   | L |
| 2261 | FGFR3 | 6132   | RPL8     | S |
| 2261 | FGFR3 | 9887   | C1orf16  | S |
| 2261 | FGFR3 | 10571  | SMA3     | S |
| 2261 | FGFR3 | 23649  | POLA2    | S |
| 2261 | FGFR3 | 55698  | FLJ10324 | S |
| 2261 | FGFR3 | 55819  | RNF130   | S |
| 2261 | FGFR3 | 57562  | KIAA1377 | S |
| 2261 | FGFR3 | 63940  | GPSM3    | L |
| 2261 | FGFR3 | 79866  | FLJ22624 | S |
| 2261 | FGFR3 | 116985 | CENTD2   | S |
| 2261 | FGFR3 | 149483 | CCDC17   | S |
| 2263 | FGFR2 | 5335   | PLCG1    | L |
| 2264 | FGFR4 | 9965   | FGF19    | L |
| 2266 | FGG   | 3383   | ICAM1    | L |
| 2266 | FGG   | 3684   | ITGAM    | L |
| 2266 | FGG   | 5104   | SERPINA5 | L |
| 2266 | FGG   | 7448   | VTN      | L |
| 2268 | FGR   | 5747   | PTK2     | L |
| 2268 | FGR   | 6504   | SLAMF1   | L |
| 2268 | FGR   | 6850   | SYK      | L |
| 2268 | FGR   | 7454   | WAS      | L |
| 2268 | FGR   | 10971  | YWHAQ    | L |
| 2271 | FH    | 4191   | MDH2     | L |
| 2272 | FHIT  | 7329   | UBE2I    | L |
| 2273 | FHL1  | 2274   | FHL2     | L |
| 2274 | FHL2  | 2275   | FHL3     | L |
| 2274 | FHL2  | 3488   | IGFBP5   | L |
| 2274 | FHL2  | 3675   | ITGA3    | L |
| 2274 | FHL2  | 3679   | ITGA7    | L |
| 2274 | FHL2  | 3688   | ITGB1    | L |
| 2274 | FHL2  | 3689   | ITGB2    | L |
| 2274 | FHL2  | 3694   | ITGB6    | L |
| 2274 | FHL2  | 4176   | MCM7     | L |
| 2274 | FHL2  | 5664   | PSEN2    | L |
| 2274 | FHL2  | 6421   | SFPQ     | L |
| 2274 | FHL2  | 7273   | TTN      | L |
| 2274 | FHL2  | 7704   | ZBTB16   | L |
| 2274 | FHL2  | 9372   | ZFYVE9   | L |
| 2274 | FHL2  | 9457   | FHL5     | L |
| 2274 | FHL2  | 22900  | CARD8    | L |
| 2274 | FHL2  | 51455  | REV1L    | L |
| 2275 | FHL3  | 3927   | LASP1    | R |
| 2275 | FHL3  | 5594   | MAPK1    | L |
| 2275 | FHL3  | 7205   | TRIP6    | R |
| 2275 | FHL3  | 7965   | JTV1     | R |
| 2275 | FHL3  | 11135  | CDC42EP1 | R |

|      |        |        |          |   |
|------|--------|--------|----------|---|
| 2275 | FHL3   | 11279  | KLF8     | L |
| 2275 | FHL3   | 51586  | PCQAP    | R |
| 2275 | FHL3   | 54507  | TSRC1    | R |
| 2275 | FHL3   | 57144  | PAK7     | R |
| 2275 | FHL3   | 79171  | MGC10433 | R |
| 2275 | FHL3   | 84708  | LNX      | R |
| 2275 | FHL3   | 222546 | RFXDC1   | R |
| 2277 | FIGF   | 2324   | FLT4     | L |
| 2277 | FIGF   | 3791   | KDR      | L |
| 2280 | FKBP1A | 2288   | FKBP4    | L |
| 2280 | FKBP1A | 2475   | FRAP1    | L |
| 2280 | FKBP1A | 3708   | ITPR1    | L |
| 2280 | FKBP1A | 5530   | PPP3CA   | L |
| 2280 | FKBP1A | 5534   | PPP3R1   | L |
| 2280 | FKBP1A | 6261   | RYR1     | L |
| 2280 | FKBP1A | 6263   | RYR3     | L |
| 2280 | FKBP1A | 7041   | TGFB111  | L |
| 2280 | FKBP1A | 7046   | TGFBR1   | L |
| 2280 | FKBP1A | 7528   | YY1      | L |
| 2280 | FKBP1A | 11146  | GLMN     | L |
| 2281 | FKBP1B | 6262   | RYR2     | L |
| 2286 | FKBP2  | 7917   | BAT3     | S |
| 2286 | FKBP2  | 10565  | ARFGEF1  | L |
| 2287 | FKBP3  | 3065   | HDAC1    | L |
| 2287 | FKBP3  | 3066   | HDAC2    | L |
| 2287 | FKBP3  | 7528   | YY1      | L |
| 2288 | FKBP4  | 2908   | NR3C1    | L |
| 2288 | FKBP4  | 3662   | IRF4     | L |
| 2288 | FKBP4  | 5264   | PHYH     | L |
| 2288 | FKBP4  | 11146  | GLMN     | L |
| 2289 | FKBP5  | 3320   | HSPCA    | L |
| 2289 | FKBP5  | 5241   | PGR      | L |
| 2290 | FOXG1B | 2308   | FOXO1A   | L |
| 2290 | FOXG1B | 2661   | GDF9     | S |
| 2290 | FOXG1B | 3065   | HDAC1    | L |
| 2290 | FOXG1B | 3280   | HES1     | L |
| 2290 | FOXG1B | 4086   | SMAD1    | L |
| 2290 | FOXG1B | 4303   | MLLT7    | L |
| 2290 | FOXG1B | 7088   | TLE1     | L |
| 2290 | FOXG1B | 7090   | TLE3     | L |
| 2290 | FOXG1B | 10765  | JARID1B  | L |
| 2295 | FOXF2  | 2959   | GTF2B    | L |
| 2295 | FOXF2  | 6908   | TBP      | L |
| 2304 | FOXE1  | 5331   | PLCB3    | L |
| 2307 | FKHL18 | 11030  | RBPMS    | R |
| 2308 | FOXO1A | 2538   | G6PC     | L |
| 2308 | FOXO1A | 3172   | HNF4A    | L |
| 2308 | FOXO1A | 3202   | HOXA5    | L |
| 2308 | FOXO1A | 4088   | SMAD3    | L |
| 2308 | FOXO1A | 4089   | SMAD4    | L |
| 2308 | FOXO1A | 6714   | SRC      | L |
| 2308 | FOXO1A | 7532   | YWHAG    | L |
| 2308 | FOXO1A | 7534   | YWHAZ    | L |
| 2309 | FOXO3A | 3551   | IKBKB    | L |
| 2309 | FOXO3A | 4087   | SMAD2    | L |
| 2309 | FOXO3A | 4088   | SMAD3    | L |
| 2309 | FOXO3A | 4089   | SMAD4    | L |
| 2309 | FOXO3A | 7534   | YWHAZ    | L |
| 2313 | FLI1   | 2623   | GATA1    | L |
| 2313 | FLI1   | 4093   | SMAD9    | L |
| 2313 | FLI1   | 6722   | SRF      | L |
| 2314 | FLII   | 9208   | LRRFIP1  | L |
| 2314 | FLII   | 9209   | LRRFIP2  | L |
| 2314 | FLII   | 10133  | OPTN     | L |
| 2314 | FLII   | 10293  | TRIP     | L |
| 2316 | FLNA   | 2317   | FLNB     | L |
| 2316 | FLNA   | 2811   | GP1BA    | L |



|      |        |       |          |   |
|------|--------|-------|----------|---|
| 2316 | FLNA   | 2897  | GRIK1    | L |
| 2316 | FLNA   | 2899  | GRIK3    | L |
| 2316 | FLNA   | 2918  | GRM8     | L |
| 2316 | FLNA   | 3688  | ITGB1    | L |
| 2316 | FLNA   | 3695  | ITGB7    | L |
| 2316 | FLNA   | 4088  | SMAD3    | L |
| 2316 | FLNA   | 4090  | SMAD5    | L |
| 2316 | FLNA   | 4867  | NPHP1    | L |
| 2316 | FLNA   | 5045  | FURIN    | L |
| 2316 | FLNA   | 5663  | PSEN1    | L |
| 2316 | FLNA   | 5664  | PSEN2    | L |
| 2316 | FLNA   | 5829  | PXN      | L |
| 2316 | FLNA   | 5898  | RALA     | L |
| 2316 | FLNA   | 6401  | SELE     | L |
| 2316 | FLNA   | 6416  | MAP2K4   | L |
| 2316 | FLNA   | 7094  | TLN1     | L |
| 2316 | FLNA   | 7186  | TRAF2    | L |
| 2316 | FLNA   | 7204  | TRIO     | L |
| 2316 | FLNA   | 7428  | VHL      | L |
| 2316 | FLNA   | 9499  | MYOT     | L |
| 2316 | FLNA   | 10019 | LNK      | L |
| 2316 | FLNA   | 54751 | FBLIM1   | L |
| 2316 | FLNA   | 80790 | CMIP     | L |
| 2316 | FLNA   | 89790 | SIGLEC10 | L |
| 2317 | FLNB   | 2811  | GP1BA    | L |
| 2317 | FLNB   | 3688  | ITGB1    | L |
| 2317 | FLNB   | 4867  | NPHP1    | L |
| 2317 | FLNB   | 5663  | PSEN1    | L |
| 2317 | FLNB   | 5664  | PSEN2    | L |
| 2317 | FLNB   | 7253  | TSHR     | L |
| 2317 | FLNB   | 54751 | FBLIM1   | L |
| 2317 | FLNB   | 55729 | ATF7IP   | L |
| 2317 | FLNB   | 64750 | SMURF2   | L |
| 2318 | FLNC   | 3636  | INPPL1   | L |
| 2318 | FLNC   | 3751  | KCND2    | L |
| 2318 | FLNC   | 4867  | NPHP1    | L |
| 2318 | FLNC   | 5045  | FURIN    | L |
| 2318 | FLNC   | 6416  | MAP2K4   | L |
| 2318 | FLNC   | 6444  | SGCD     | L |
| 2318 | FLNC   | 6445  | SGCG     | L |
| 2318 | FLNC   | 9499  | MYOT     | L |
| 2318 | FLNC   | 10114 | HIPK3    | L |
| 2318 | FLNC   | 58529 | MYOZ1    | L |
| 2318 | FLNC   | 90102 | PHLDB2   | L |
| 2321 | FLT1   | 3791  | KDR      | L |
| 2321 | FLT1   | 5228  | PGF      | L |
| 2321 | FLT1   | 5336  | PLCG2    | L |
| 2321 | FLT1   | 6464  | SHC1     | L |
| 2321 | FLT1   | 7422  | VEGF     | L |
| 2321 | FLT1   | 7423  | VEGFB    | L |
| 2321 | FLT1   | 25759 | SHC2     | L |
| 2322 | FLT3   | 2323  | FLT3LG   | L |
| 2322 | FLT3   | 2885  | GRB2     | L |
| 2322 | FLT3   | 6464  | SHC1     | L |
| 2322 | FLT3   | 8651  | SOCS1    | L |
| 2323 | FLT3LG | 4254  | KITLG    | L |
| 2323 | FLT3LG | 5217  | PFN2     | S |
| 2324 | FLT4   | 2885  | GRB2     | L |
| 2324 | FLT4   | 3688  | ITGB1    | L |
| 2324 | FLT4   | 6464  | SHC1     | L |
| 2324 | FLT4   | 7424  | VEGFC    | L |
| 2324 | FLT4   | 55729 | ATF7IP   | L |
| 2329 | FMO4   | 7094  | TLN1     | L |
| 2331 | FMOD   | 7040  | TGFB1    | L |
| 2331 | FMOD   | 7042  | TGFB2    | L |
| 2331 | FMOD   | 7043  | TGFB3    | L |
| 2332 | FMR1   | 7329  | UBE2I    | L |

|      |       |        |          |   |
|------|-------|--------|----------|---|
| 2332 | FMR1  | 8087   | FXR1     | L |
| 2332 | FMR1  | 9513   | FXR2     | L |
| 2332 | FMR1  | 23191  | CYFIP1   | L |
| 2332 | FMR1  | 26747  | NUFIP1   | L |
| 2332 | FMR1  | 26999  | CYFIP2   | L |
| 2332 | FMR1  | 57532  | 182-FIP  | L |
| 2335 | FN1   | 2934   | GSN      | L |
| 2335 | FN1   | 3371   | TNC      | L |
| 2335 | FN1   | 3486   | IGFBP3   | L |
| 2335 | FN1   | 3675   | ITGA3    | L |
| 2335 | FN1   | 3676   | ITGA4    | L |
| 2335 | FN1   | 3694   | ITGB6    | L |
| 2335 | FN1   | 3695   | ITGB7    | L |
| 2335 | FN1   | 3959   | LGALS3BP | L |
| 2335 | FN1   | 4018   | LPA      | L |
| 2335 | FN1   | 4052   | LTBP1    | L |
| 2335 | FN1   | 4089   | SMAD4    | L |
| 2335 | FN1   | 4093   | SMAD9    | L |
| 2335 | FN1   | 4147   | MATN2    | L |
| 2335 | FN1   | 4224   | MEP1A    | L |
| 2335 | FN1   | 4225   | MEP1B    | L |
| 2335 | FN1   | 4318   | MMP9     | L |
| 2335 | FN1   | 4653   | MYOC     | L |
| 2335 | FN1   | 4856   | NOV      | L |
| 2335 | FN1   | 5068   | REG3A    | L |
| 2335 | FN1   | 5310   | PKD1     | L |
| 2335 | FN1   | 5549   | PRELP    | L |
| 2335 | FN1   | 5829   | PXN      | L |
| 2335 | FN1   | 6383   | SDC2     | L |
| 2335 | FN1   | 6387   | CXCL12   | L |
| 2335 | FN1   | 6498   | SKIL     | L |
| 2335 | FN1   | 6863   | TAC1     | L |
| 2335 | FN1   | 7045   | TGFBI    | L |
| 2335 | FN1   | 7052   | TGM2     | L |
| 2335 | FN1   | 7057   | THBS1    | L |
| 2335 | FN1   | 7094   | TLN1     | L |
| 2335 | FN1   | 7253   | TSHR     | L |
| 2335 | FN1   | 7356   | SCGB1A1  | L |
| 2335 | FN1   | 7414   | VCL      | L |
| 2335 | FN1   | 7428   | VHL      | L |
| 2335 | FN1   | 8190   | MIA      | L |
| 2335 | FN1   | 8516   | ITGA8    | L |
| 2335 | FN1   | 55660  | FNBP3    | L |
| 2335 | FN1   | 90070  | LACRT    | L |
| 2335 | FN1   | 164656 | TMPRSS6  | L |
| 2339 | FNTA  | 2342   | FNTB     | L |
| 2339 | FNTA  | 7040   | TGFB1    | L |
| 2339 | FNTA  | 7046   | TGFBR1   | L |
| 2348 | FOLR1 | 4067   | LYN      | L |
| 2353 | FOS   | 2355   | FOSL2    | L |
| 2353 | FOS   | 2626   | GATA4    | L |
| 2353 | FOS   | 2963   | GTF2F2   | L |
| 2353 | FOS   | 3725   | JUN      | L |
| 2353 | FOS   | 3726   | JUNB     | L |
| 2353 | FOS   | 3727   | JUND     | L |
| 2353 | FOS   | 4094   | MAF      | L |
| 2353 | FOS   | 4286   | MITF     | L |
| 2353 | FOS   | 4773   | NFATC2   | L |
| 2353 | FOS   | 4790   | NFKB1    | L |
| 2353 | FOS   | 5371   | PML      | L |
| 2353 | FOS   | 5925   | RB1      | L |
| 2353 | FOS   | 5970   | RELA     | L |
| 2353 | FOS   | 6602   | SMARCD1  | L |
| 2353 | FOS   | 6872   | TAF1     | L |
| 2353 | FOS   | 6885   | MAP3K7   | L |
| 2353 | FOS   | 6908   | TBP      | L |
| 2353 | FOS   | 6927   | TCF1     | L |

|      |       |        |          |    |
|------|-------|--------|----------|----|
| 2353 | FOS   | 7392   | USF2     | L  |
| 2353 | FOS   | 7494   | XBP1     | L  |
| 2353 | FOS   | 8648   | NCOA1    | L  |
| 2353 | FOS   | 8986   | RPS6KA4  | L  |
| 2353 | FOS   | 9586   | CREB5    | L  |
| 2353 | FOS   | 9612   | NCOR2    | L  |
| 2353 | FOS   | 9935   | MAFB     | L  |
| 2353 | FOS   | 10538  | BATF     | L  |
| 2353 | FOS   | 11016  | ATF7     | L  |
| 2353 | FOS   | 25920  | COBRA1   | L  |
| 2354 | FOSB  | 3725   | JUN      | L  |
| 2354 | FOSB  | 3726   | JUNB     | L  |
| 2354 | FOSB  | 3727   | JUND     | L  |
| 2354 | FOSB  | 8061   | FOSL1    | L  |
| 2354 | FOSB  | 9586   | CREB5    | L  |
| 2354 | FOSB  | 9935   | MAFB     | L  |
| 2354 | FOSB  | 11016  | ATF7     | L  |
| 2355 | FOSL2 | 3725   | JUN      | L  |
| 2355 | FOSL2 | 3726   | JUNB     | L  |
| 2355 | FOSL2 | 3727   | JUND     | L  |
| 2355 | FOSL2 | 7008   | TEF      | L  |
| 2355 | FOSL2 | 9586   | CREB5    | L  |
| 2355 | FOSL2 | 9935   | MAFB     | L  |
| 2355 | FOSL2 | 11016  | ATF7     | L  |
| 2357 | FPR1  | 2771   | GNAI2    | L  |
| 2395 | FXN   | 9512   | PMPCB    | L  |
| 2444 | FRK   | 5925   | RB1      | L  |
| 2475 | FRAP1 | 5170   | PDPK1    | L  |
| 2475 | FRAP1 | 10243  | GPHN     | L  |
| 2475 | FRAP1 | 29979  | UBQLN1   | L  |
| 2475 | FRAP1 | 57521  | raptor   | L  |
| 2475 | FRAP1 | 253260 | AVO3     | L  |
| 2488 | FSHB  | 2492   | FSHR     | L  |
| 2492 | FSHR  | 2868   | GRK4     | L  |
| 2492 | FSHR  | 2870   | GRK6     | L  |
| 2492 | FSHR  | 6281   | S100A10  | L  |
| 2492 | FSHR  | 7150   | TOP1     | L  |
| 2492 | FSHR  | 7704   | ZBTB16   | L  |
| 2492 | FSHR  | 10971  | YWHAQ    | L  |
| 2492 | FSHR  | 23468  | CBX5     | L  |
| 2492 | FSHR  | 26060  | APPL     | L  |
| 2494 | NR5A2 | 8431   | NR0B2    | L  |
| 2494 | NR5A2 | 8721   | EDF1     | L  |
| 2495 | FTH1  | 2512   | FTL      | RS |
| 2495 | FTH1  | 9513   | FXR2     | R  |
| 2495 | FTH1  | 29117  | BRD7     | S  |
| 2495 | FTH1  | 51280  | GOLPH2   | S  |
| 2495 | FTH1  | 80237  | ELL3     | S  |
| 2495 | FTH1  | 197131 | UBR1     | S  |
| 2512 | FTL   | 3827   | KNG1     | L  |
| 2512 | FTL   | 4093   | SMAD9    | L  |
| 2512 | FTL   | 5764   | PTN      | S  |
| 2512 | FTL   | 6881   | TAF10    | S  |
| 2512 | FTL   | 7786   | MAP3K12  | S  |
| 2512 | FTL   | 10200  | MPHOSPH6 | L  |
| 2512 | FTL   | 51678  | MPP6     | L  |
| 2516 | NR5A1 | 2626   | GATA4    | L  |
| 2516 | NR5A1 | 2959   | GTF2B    | L  |
| 2516 | NR5A1 | 3725   | JUN      | L  |
| 2516 | NR5A1 | 5307   | PITX1    | L  |
| 2516 | NR5A1 | 6662   | SOX9     | L  |
| 2516 | NR5A1 | 6667   | SP1      | L  |
| 2516 | NR5A1 | 8204   | NRIP1    | L  |
| 2516 | NR5A1 | 8648   | NCOA1    | L  |
| 2516 | NR5A1 | 8721   | EDF1     | L  |
| 2516 | NR5A1 | 55629  | PNRC2    | L  |
| 2516 | NR5A1 | 55809  | TRERF1   | L  |

|      |       |       |         |    |
|------|-------|-------|---------|----|
| 2517 | FUCA1 | 7414  | VCL     | L  |
| 2521 | FUS   | 3276  | HRMT1L2 | SL |
| 2521 | FUS   | 3609  | ILF3    | L  |
| 2521 | FUS   | 4904  | YBX1    | L  |
| 2521 | FUS   | 5725  | PTBP1   | L  |
| 2521 | FUS   | 5970  | RELA    | L  |
| 2521 | FUS   | 6256  | RXRA    | L  |
| 2521 | FUS   | 6427  | SFRS2   | L  |
| 2521 | FUS   | 6429  | SFRS4   | L  |
| 2521 | FUS   | 6688  | SPI1    | L  |
| 2521 | FUS   | 7067  | THRA    | L  |
| 2521 | FUS   | 7094  | TLN1    | L  |
| 2521 | FUS   | 7414  | VCL     | L  |
| 2521 | FUS   | 7536  | SF1     | L  |
| 2521 | FUS   | 10250 | SRRM1   | L  |
| 2521 | FUS   | 10772 | FUSIP1  | L  |
| 2526 | FUT4  | 3689  | ITGB2   | L  |
| 2526 | FUT4  | 6403  | SELP    | L  |
| 2532 | FY    | 2919  | CXCL1   | L  |
| 2532 | FY    | 3576  | IL8     | L  |
| 2532 | FY    | 6347  | CCL2    | L  |
| 2532 | FY    | 6352  | CCL5    | L  |
| 2533 | FYB   | 2534  | FYN     | L  |
| 2533 | FYB   | 3937  | LCP2    | L  |
| 2533 | FYB   | 4068  | SH2D1A  | L  |
| 2533 | FYB   | 7408  | VASP    | L  |
| 2533 | FYB   | 7454  | WAS     | L  |
| 2533 | FYB   | 8631  | SCAP1   | L  |
| 2533 | FYB   | 8935  | SCAP2   | L  |
| 2534 | FYN   | 2887  | GRB10   | L  |
| 2534 | FYN   | 2903  | GRIN2A  | L  |
| 2534 | FYN   | 2904  | GRIN2B  | L  |
| 2534 | FYN   | 3190  | HNRPK   | L  |
| 2534 | FYN   | 3575  | IL7R    | L  |
| 2534 | FYN   | 3702  | ITK     | L  |
| 2534 | FYN   | 3717  | JAK2    | L  |
| 2534 | FYN   | 4068  | SH2D1A  | L  |
| 2534 | FYN   | 4099  | MAG     | L  |
| 2534 | FYN   | 4162  | MCAM    | L  |
| 2534 | FYN   | 4868  | NPHS1   | L  |
| 2534 | FYN   | 4915  | NTRK2   | L  |
| 2534 | FYN   | 5159  | PDGFRB  | L  |
| 2534 | FYN   | 5175  | PECAM1  | L  |
| 2534 | FYN   | 5295  | PIK3R1  | L  |
| 2534 | FYN   | 5296  | PIK3R2  | L  |
| 2534 | FYN   | 5329  | PLAUR   | L  |
| 2534 | FYN   | 5335  | PLCG1   | L  |
| 2534 | FYN   | 5336  | PLCG2   | L  |
| 2534 | FYN   | 5338  | PLD2    | L  |
| 2534 | FYN   | 5588  | PRKCQ   | L  |
| 2534 | FYN   | 5781  | PTPN11  | L  |
| 2534 | FYN   | 5786  | PTPRA   | L  |
| 2534 | FYN   | 5788  | PTPRC   | L  |
| 2534 | FYN   | 5829  | PXN     | L  |
| 2534 | FYN   | 5894  | RAF1    | L  |
| 2534 | FYN   | 6504  | SLAMF1  | L  |
| 2534 | FYN   | 6622  | SNCA    | L  |
| 2534 | FYN   | 6654  | SOS1    | L  |
| 2534 | FYN   | 6693  | SPN     | L  |
| 2534 | FYN   | 6850  | SYK     | L  |
| 2534 | FYN   | 7070  | THY1    | L  |
| 2534 | FYN   | 7225  | TRPC6   | L  |
| 2534 | FYN   | 7277  | TUBA1   | L  |
| 2534 | FYN   | 7278  | TUBA2   | L  |
| 2534 | FYN   | 7297  | TYK2    | L  |
| 2534 | FYN   | 7301  | TYRO3   | L  |
| 2534 | FYN   | 7409  | VAV1    | L  |

|      |       |        |           |   |
|------|-------|--------|-----------|---|
| 2534 | FYN   | 7454   | WAS       | L |
| 2534 | FYN   | 7535   | ZAP70     | L |
| 2534 | FYN   | 8631   | SCAP1     | L |
| 2534 | FYN   | 8651   | SOCS1     | L |
| 2534 | FYN   | 8751   | ADAM15    | L |
| 2534 | FYN   | 8935   | SCAP2     | L |
| 2534 | FYN   | 8936   | WASF1     | L |
| 2534 | FYN   | 9094   | UNC119    | L |
| 2534 | FYN   | 9564   | BCAR1     | L |
| 2534 | FYN   | 9672   | SDC3      | L |
| 2534 | FYN   | 10163  | WASF2     | L |
| 2534 | FYN   | 10188  | TNK2      | L |
| 2534 | FYN   | 10376  | K-ALPHA-1 | L |
| 2534 | FYN   | 10399  | GNB2L1    | L |
| 2534 | FYN   | 10657  | KHDRBS1   | L |
| 2534 | FYN   | 10666  | CD226     | L |
| 2534 | FYN   | 23360  | FNBP4     | L |
| 2534 | FYN   | 23607  | CD2AP     | L |
| 2534 | FYN   | 27240  | SIT1      | L |
| 2534 | FYN   | 51206  | GP6       | L |
| 2534 | FYN   | 51466  | EVL       | L |
| 2534 | FYN   | 55824  | PAG1      | L |
| 2534 | FYN   | 59341  | TRPV4     | L |
| 2534 | FYN   | 84867  | PTPN5     | L |
| 2534 | FYN   | 91746  | YT521     | L |
| 2534 | FYN   | 139716 | GAB3      | L |
| 2547 | XRCC6 | 2648   | GCN5L2    | L |
| 2547 | XRCC6 | 3221   | HOXC4     | L |
| 2547 | XRCC6 | 3297   | HSF1      | L |
| 2547 | XRCC6 | 4088   | SMAD3     | L |
| 2547 | XRCC6 | 4092   | SMAD7     | L |
| 2547 | XRCC6 | 4361   | MRE11A    | L |
| 2547 | XRCC6 | 4689   | NCF4      | L |
| 2547 | XRCC6 | 4809   | NHP2L1    | S |
| 2547 | XRCC6 | 4817   | NIT1      | S |
| 2547 | XRCC6 | 4851   | NOTCH1    | S |
| 2547 | XRCC6 | 5047   | PAEP      | S |
| 2547 | XRCC6 | 5050   | PAFAH1B3  | S |
| 2547 | XRCC6 | 5111   | PCNA      | L |
| 2547 | XRCC6 | 5175   | PECAM1    | S |
| 2547 | XRCC6 | 5223   | PGAM1     | S |
| 2547 | XRCC6 | 5272   | SERPINB9  | S |
| 2547 | XRCC6 | 5447   | POR       | S |
| 2547 | XRCC6 | 5451   | POU2F1    | L |
| 2547 | XRCC6 | 5452   | POU2F2    | L |
| 2547 | XRCC6 | 5599   | MAPK8     | L |
| 2547 | XRCC6 | 5826   | ABCD4     | S |
| 2547 | XRCC6 | 5829   | PXN       | L |
| 2547 | XRCC6 | 5928   | RBBP4     | S |
| 2547 | XRCC6 | 6176   | RPLP1     | S |
| 2547 | XRCC6 | 6498   | SKIL      | L |
| 2547 | XRCC6 | 6640   | SNTA1     | S |
| 2547 | XRCC6 | 6904   | TBCD      | S |
| 2547 | XRCC6 | 7014   | TERF2     | L |
| 2547 | XRCC6 | 7015   | TERT      | L |
| 2547 | XRCC6 | 7409   | VAV1      | L |
| 2547 | XRCC6 | 7486   | WRN       | L |
| 2547 | XRCC6 | 7520   | XRCC5     | L |
| 2547 | XRCC6 | 7534   | YWHAZ     | S |
| 2547 | XRCC6 | 8900   | CCNA1     | L |
| 2547 | XRCC6 | 9232   | PTTG1     | L |
| 2547 | XRCC6 | 10994  | ILVBL     | S |
| 2547 | XRCC6 | 22800  | RRAS2     | S |
| 2547 | XRCC6 | 23054  | NCOA6     | L |
| 2547 | XRCC6 | 23199  | KIAA0182  | S |
| 2547 | XRCC6 | 23411  | SIRT1     | L |
| 2547 | XRCC6 | 23468  | CBX5      | L |

|      |        |        |          |   |
|------|--------|--------|----------|---|
| 2547 | XRCC6  | 55848  | C9orf46  | S |
| 2547 | XRCC6  | 57473  | GM632    | L |
| 2547 | XRCC6  | 65057  | ACD      | S |
| 2547 | XRCC6  | 79690  | GAL3ST4  | S |
| 2547 | XRCC6  | 79756  | (null)   | S |
| 2547 | XRCC6  | 90861  | C16orf34 | S |
| 2547 | XRCC6  | 113130 | CDCA5    | S |
| 2547 | XRCC6  | 116985 | CENTD2   | S |
| 2547 | XRCC6  | 380789 | (null)   | S |
| 2549 | GAB1   | 2885   | GRB2     | L |
| 2549 | GAB1   | 3643   | INSR     | L |
| 2549 | GAB1   | 4215   | MAP3K3   | L |
| 2549 | GAB1   | 4233   | MET      | L |
| 2549 | GAB1   | 5295   | PIK3R1   | L |
| 2549 | GAB1   | 5335   | PLCG1    | L |
| 2549 | GAB1   | 5336   | PLCG2    | L |
| 2549 | GAB1   | 5781   | PTPN11   | L |
| 2549 | GAB1   | 5979   | RET      | L |
| 2549 | GAB1   | 6654   | SOS1     | L |
| 2549 | GAB1   | 9402   | GRAP2    | L |
| 2550 | GABBR1 | 9568   | GPR51    | L |
| 2550 | GABBR1 | 22809  | ATF5     | L |
| 2550 | GABBR1 | 55743  | CHFR     | S |
| 2550 | GABBR1 | 152789 | MARLIN1  | L |
| 2551 | GABPA  | 6667   | SP1      | L |
| 2551 | GABPA  | 6670   | SP3      | L |
| 2553 | GABPB2 | 8615   | VDP      | R |
| 2553 | GABPB2 | 23424  | TDRD7    | R |
| 2553 | GABPB2 | 55885  | LMO3     | R |
| 2553 | GABPB2 | 286514 | MAGEB18  | R |
| 2554 | GABRA1 | 5580   | PRKCD    | L |
| 2554 | GABRA1 | 5582   | PRKCG    | L |
| 2557 | GABRA4 | 5582   | PRKCG    | L |
| 2561 | GABRB2 | 3350   | HTR1A    | L |
| 2561 | GABRB2 | 66008  | ALS2CR3  | L |
| 2563 | GABRD  | 29979  | UBQLN1   | R |
| 2566 | GABRG2 | 11337  | GABARAP  | L |
| 2571 | GAD1   | 23498  | HAAO     | R |
| 2577 | GAGE5  | 64396  | GMCL1L   | R |
| 2580 | GAK    | 3312   | HSPA8    | L |
| 2580 | GAK    | 8312   | AXIN1    | S |
| 2580 | GAK    | 8615   | VDP      | R |
| 2580 | GAK    | 8907   | AP1M1    | L |
| 2580 | GAK    | 10053  | AP1M2    | L |
| 2587 | GALR1  | 51083  | GAL      | L |
| 2588 | GALNS  | 4758   | NEU1     | L |
| 2589 | GALNT1 | 4582   | MUC1     | L |
| 2590 | GALNT2 | 4582   | MUC1     | L |
| 2592 | GALT   | 9319   | TRIP13   | R |
| 2596 | GAP43  | 5333   | PLCD1    | L |
| 2596 | GAP43  | 6709   | SPTAN1   | L |
| 2596 | GAP43  | 9135   | RABEP1   | L |
| 2597 | GAPDH  | 2911   | GRM1     | L |
| 2597 | GAPDH  | 3064   | HD       | L |
| 2597 | GAPDH  | 3910   | LAMA4    | S |
| 2597 | GAPDH  | 5050   | PAFAH1B3 | S |
| 2597 | GAPDH  | 5052   | PRDX1    | S |
| 2597 | GAPDH  | 5230   | PGK1     | L |
| 2597 | GAPDH  | 5272   | SERPINB9 | S |
| 2597 | GAPDH  | 5338   | PLD2     | L |
| 2597 | GAPDH  | 5584   | PRKCI    | L |
| 2597 | GAPDH  | 5717   | PSMD11   | S |
| 2597 | GAPDH  | 5829   | PXN      | L |
| 2597 | GAPDH  | 6118   | RPA2     | S |
| 2597 | GAPDH  | 6277   | S100A6   | L |
| 2597 | GAPDH  | 6310   | ATXN1    | L |
| 2597 | GAPDH  | 6513   | SLC2A1   | L |

|      |         |        |          |   |
|------|---------|--------|----------|---|
| 2597 | GAPDH   | 7083   | TK1      | S |
| 2597 | GAPDH   | 7094   | TLN1     | L |
| 2597 | GAPDH   | 7414   | VCL      | L |
| 2597 | GAPDH   | 8655   | DNCL1    | L |
| 2597 | GAPDH   | 10542  | HBXIP    | S |
| 2597 | GAPDH   | 54622  | ARFRP2   | S |
| 2597 | GAPDH   | 55643  | BTBD2    | S |
| 2597 | GAPDH   | 56144  | PCDHA4   | S |
| 2597 | GAPDH   | 64714  | PDIA2    | L |
| 2617 | GARS    | 3376   | IARS     | L |
| 2617 | GARS    | 10243  | GPHN     | L |
| 2619 | GAS1    | 8788   | DLK1     | L |
| 2621 | GAS6    | 7301   | TYRO3    | L |
| 2621 | GAS6    | 10461  | MERTK    | L |
| 2623 | GATA1   | 4005   | LMO2     | L |
| 2623 | GATA1   | 6886   | TAL1     | L |
| 2623 | GATA1   | 7704   | ZBTB16   | L |
| 2623 | GATA1   | 10014  | HDAC5    | L |
| 2623 | GATA1   | 23414  | ZFPM2    | L |
| 2624 | GATA2   | 3725   | JUN      | L |
| 2624 | GATA2   | 5371   | PML      | L |
| 2624 | GATA2   | 5449   | POU1F1   | L |
| 2624 | GATA2   | 5914   | RARA     | L |
| 2624 | GATA2   | 6688   | SPI1     | L |
| 2624 | GATA2   | 7704   | ZBTB16   | L |
| 2624 | GATA2   | 8841   | HDAC3    | L |
| 2624 | GATA2   | 10014  | HDAC5    | L |
| 2624 | GATA2   | 161882 | ZFPM1    | L |
| 2625 | GATA3   | 4004   | LMO1     | L |
| 2625 | GATA3   | 4005   | LMO2     | L |
| 2625 | GATA3   | 6886   | TAL1     | L |
| 2626 | GATA4   | 4776   | NFATC4   | L |
| 2626 | GATA4   | 5595   | MAPK3    | L |
| 2626 | GATA4   | 6722   | SRF      | L |
| 2626 | GATA4   | 6910   | TBX5     | L |
| 2626 | GATA4   | 9464   | HAND2    | L |
| 2626 | GATA4   | 23414  | ZFPM2    | L |
| 2629 | GBA     | 5660   | PSAP     | L |
| 2632 | GBE1    | 5226   | PGD      | S |
| 2634 | GBP2    | 3336   | HSPE1    | S |
| 2634 | GBP2    | 5050   | PAFAH1B3 | S |
| 2634 | GBP2    | 5272   | SERPINB9 | S |
| 2634 | GBP2    | 5511   | PPP1R8   | S |
| 2634 | GBP2    | 6303   | SAT      | S |
| 2634 | GBP2    | 8087   | FXR1     | S |
| 2634 | GBP2    | 9223   | MAGI1    | S |
| 2634 | GBP2    | 10342  | TFG      | S |
| 2634 | GBP2    | 22929  | SEPHS1   | S |
| 2634 | GBP2    | 27252  | KLHL20   | S |
| 2634 | GBP2    | 55643  | BTBD2    | S |
| 2634 | GBP2    | 57819  | LSM2     | S |
| 2635 | GBP3    | 9448   | MAP4K4   | L |
| 2638 | GC      | 4036   | LRP2     | L |
| 2638 | GC      | 8029   | CUBN     | L |
| 2638 | GC      | 10169  | SERF2    | S |
| 2638 | GC      | 55791  | C1orf103 | S |
| 2638 | GC      | 79577  | CDC73    | S |
| 2641 | GCG     | 2642   | GCGR     | L |
| 2641 | GCG     | 2740   | GLP1R    | L |
| 2641 | GCG     | 9340   | GLP2R    | L |
| 2642 | GCGR    | 2778   | GNAS     | L |
| 2643 | GCH1    | 2644   | GCHFR    | L |
| 2645 | GCK     | 2646   | GCKR     | L |
| 2647 | BLOC1S1 | 4149   | MAX      | L |
| 2647 | BLOC1S1 | 5089   | PBX2     | L |
| 2647 | BLOC1S1 | 5764   | PTN      | S |
| 2647 | BLOC1S1 | 9112   | MTA1     | L |

|      |        |       |          |   |
|------|--------|-------|----------|---|
| 2648 | GCN5L2 | 4609  | MYC      | L |
| 2648 | GCN5L2 | 6871  | TADA2L   | L |
| 2649 | NR6A1  | 9611  | NCOR1    | L |
| 2649 | NR6A1  | 10681 | GNB5     | S |
| 2649 | NR6A1  | 51720 | RAP80    | L |
| 2650 | GCNT1  | 5579  | PRKCB1   | L |
| 2652 | OPN1MW | 5903  | RANBP2   | L |
| 2653 | GCSH   | 7704  | ZBTB16   | S |
| 2653 | GCSH   | 9111  | NMI      | R |
| 2653 | GCSH   | 84289 | ING5     | S |
| 2660 | GDF8   | 8557  | TCAP     | L |
| 2660 | GDF8   | 10272 | FSTL3    | L |
| 2661 | GDF9   | 3609  | ILF3     | S |
| 2661 | GDF9   | 3835  | KIF22    | S |
| 2661 | GDF9   | 4715  | NDUFB9   | S |
| 2661 | GDF9   | 5050  | PAFAH1B3 | S |
| 2661 | GDF9   | 5272  | SERPINB9 | S |
| 2661 | GDF9   | 5717  | PSMD11   | S |
| 2661 | GDF9   | 5873  | RAB27A   | S |
| 2661 | GDF9   | 6279  | S100A8   | S |
| 2661 | GDF9   | 6303  | SAT      | S |
| 2661 | GDF9   | 6606  | SMN1     | S |
| 2661 | GDF9   | 6637  | SNRPG    | S |
| 2661 | GDF9   | 6997  | TDGF1    | S |
| 2661 | GDF9   | 7083  | TK1      | S |
| 2661 | GDF9   | 8575  | PRKRA    | S |
| 2661 | GDF9   | 10200 | MPHOSPH6 | S |
| 2661 | GDF9   | 10301 | DLEU1    | S |
| 2661 | GDF9   | 11243 | PMF1     | S |
| 2661 | GDF9   | 23028 | AOF2     | S |
| 2661 | GDF9   | 25843 | PREI3    | S |
| 2661 | GDF9   | 26292 | MYCBP    | S |
| 2661 | GDF9   | 27258 | LSM3     | S |
| 2661 | GDF9   | 29888 | STRN4    | S |
| 2661 | GDF9   | 51019 | CGI-116  | S |
| 2661 | GDF9   | 51319 | RSRC1    | S |
| 2661 | GDF9   | 53826 | FXVD6    | S |
| 2661 | GDF9   | 55643 | BTBD2    | S |
| 2661 | GDF9   | 56144 | PCDHA4   | S |
| 2661 | GDF9   | 57761 | TRIB3    | S |
| 2661 | GDF9   | 78987 | CRELD1   | S |
| 2661 | GDF9   | 79756 | (null)   | S |
| 2661 | GDF9   | 80228 | C7orf19  | S |
| 2661 | GDF9   | 83440 | ADPGK    | S |
| 2664 | GDI1   | 5880  | RAC2     | L |
| 2664 | GDI1   | 10567 | RABAC1   | L |
| 2664 | GDI1   | 81876 | RAB1B    | L |
| 2665 | GDI2   | 4218  | RAB8A    | L |
| 2665 | GDI2   | 5862  | RAB2     | L |
| 2665 | GDI2   | 5867  | RAB4A    | L |
| 2665 | GDI2   | 5868  | RAB5A    | L |
| 2665 | GDI2   | 8766  | RAB11A   | L |
| 2665 | GDI2   | 9367  | RAB9A    | L |
| 2668 | GDNF   | 2674  | GFRA1    | L |
| 2668 | GDNF   | 2675  | GFRA2    | L |
| 2668 | GDNF   | 5979  | RET      | L |
| 2669 | GEM    | 9260  | PDLIM7   | R |
| 2669 | GEM    | 51291 | GMIP     | L |
| 2670 | GFAP   | 4221  | MEN1     | L |
| 2670 | GFAP   | 5174  | PDZK1    | R |
| 2670 | GFAP   | 5663  | PSEN1    | L |
| 2670 | GFAP   | 6271  | S100A1   | L |
| 2670 | GFAP   | 6285  | S100B    | L |
| 2670 | GFAP   | 6714  | SRC      | L |
| 2670 | GFAP   | 7431  | VIM      | R |
| 2670 | GFAP   | 9124  | PDLIM1   | R |
| 2670 | GFAP   | 9260  | PDLIM7   | R |



|      |         |        |          |   |
|------|---------|--------|----------|---|
| 2670 | GFAP    | 9402   | GRAP2    | R |
| 2670 | GFAP    | 9729   | KIAA0408 | R |
| 2670 | GFAP    | 9883   | POM121   | R |
| 2670 | GFAP    | 26150  | RIBC2    | R |
| 2670 | GFAP    | 26751  | SH3YL1   | R |
| 2670 | GFAP    | 27229  | 76P      | R |
| 2670 | GFAP    | 79959  | C18orf9  | R |
| 2670 | GFAP    | 80022  | MYO15B   | R |
| 2671 | GFER    | 10987  | COPS5    | L |
| 2671 | GFER    | 84164  | ASCC2    | S |
| 2671 | GFER    | 149428 | BNIP1    | L |
| 2672 | GFI1    | 10401  | PIAS3    | L |
| 2674 | GFRA1   | 4902   | NRTN     | L |
| 2674 | GFRA1   | 5979   | RET      | L |
| 2676 | GFRA3   | 9048   | ARTN     | L |
| 2683 | B4GALT1 | 3906   | LALBA    | L |
| 2688 | GH1     | 2690   | GHR      | L |
| 2688 | GH1     | 5618   | PRLR     | L |
| 2689 | GH2     | 2690   | GHR      | L |
| 2690 | GHR     | 2885   | GRB2     | L |
| 2690 | GHR     | 2887   | GRB10    | L |
| 2690 | GHR     | 3716   | JAK1     | L |
| 2690 | GHR     | 3717   | JAK2     | L |
| 2690 | GHR     | 5295   | PIK3R1   | L |
| 2690 | GHR     | 5777   | PTPN6    | L |
| 2690 | GHR     | 5781   | PTPN11   | L |
| 2690 | GHR     | 6449   | SGTA     | L |
| 2690 | GHR     | 6464   | SHC1     | L |
| 2690 | GHR     | 6774   | STAT3    | L |
| 2690 | GHR     | 6776   | STAT5A   | L |
| 2690 | GHR     | 6777   | STAT5B   | L |
| 2690 | GHR     | 7297   | TYK2     | L |
| 2690 | GHR     | 8651   | SOCS1    | L |
| 2690 | GHR     | 8835   | SOCS2    | L |
| 2690 | GHR     | 9021   | SOCS3    | L |
| 2691 | GHRH    | 2692   | GHRHR    | L |
| 2692 | GHRHR   | 51738  | GHRL     | L |
| 2693 | GHSR    | 51738  | GHRL     | L |
| 2694 | GIF     | 8029   | CUBN     | L |
| 2697 | GJA1    | 2700   | GJA3     | L |
| 2697 | GJA1    | 2702   | GJA5     | L |
| 2697 | GJA1    | 5578   | PRKCA    | L |
| 2697 | GJA1    | 5581   | PRKCE    | L |
| 2697 | GJA1    | 5598   | MAPK7    | L |
| 2697 | GJA1    | 6271   | S100A1   | L |
| 2697 | GJA1    | 6714   | SRC      | L |
| 2697 | GJA1    | 7082   | TJP1     | L |
| 2700 | GJA3    | 4284   | MIP      | L |
| 2700 | GJA3    | 7082   | TJP1     | L |
| 2702 | GJA5    | 25980  | C20orf4  | R |
| 2703 | GJA8    | 4284   | MIP      | L |
| 2703 | GJA8    | 7082   | TJP1     | L |
| 2705 | GJB1    | 2706   | GJB2     | L |
| 2705 | GJB1    | 4950   | OCLN     | L |
| 2707 | GJB3    | 7082   | TJP1     | L |
| 2719 | GPC3    | 3481   | IGF2     | L |
| 2719 | GPC3    | 10518  | CIB2     | L |
| 2720 | GLB1    | 4758   | NEU1     | L |
| 2733 | GLE1L   | 9631   | NUP155   | L |
| 2734 | GLG1    | 6401   | SELE     | L |
| 2735 | GLI1    | 7545   | ZIC1     | L |
| 2735 | GLI1    | 7546   | ZIC2     | L |
| 2735 | GLI1    | 27148  | STK36    | L |
| 2735 | GLI1    | 51684  | SUFU     | L |
| 2736 | GLI2    | 7545   | ZIC1     | L |
| 2736 | GLI2    | 7546   | ZIC2     | L |
| 2736 | GLI2    | 27148  | STK36    | L |

|      |       |       |          |   |
|------|-------|-------|----------|---|
| 2736 | GLI2  | 51684 | SUFU     | L |
| 2737 | GLI3  | 4086  | SMAD1    | L |
| 2737 | GLI3  | 4087  | SMAD2    | L |
| 2737 | GLI3  | 4088  | SMAD3    | L |
| 2737 | GLI3  | 4089  | SMAD4    | L |
| 2737 | GLI3  | 7291  | TWIST1   | L |
| 2737 | GLI3  | 7545  | ZIC1     | L |
| 2737 | GLI3  | 7546  | ZIC2     | L |
| 2737 | GLI3  | 27148 | STK36    | L |
| 2737 | GLI3  | 51684 | SUFU     | L |
| 2742 | GLRA2 | 5662  | PSD      | S |
| 2742 | GLRA2 | 7917  | BAT3     | S |
| 2742 | GLRA2 | 56927 | GPR108   | S |
| 2743 | GLRB  | 10243 | GPHN     | L |
| 2744 | GLS   | 6640  | SNTA1    | L |
| 2745 | GLRX  | 4217  | MAP3K5   | L |
| 2747 | GLUD2 | 10040 | TOM1L1   | S |
| 2752 | GLUL  | 6498  | SKIL     | L |
| 2752 | GLUL  | 8655  | DNCL1    | L |
| 2752 | GLUL  | 79666 | PLEKHF2  | R |
| 2752 | GLUL  | 79873 | NUDT18   | R |
| 2760 | GM2A  | 2822  | GPLD1    | L |
| 2760 | GM2A  | 3073  | HEXA     | L |
| 2760 | GM2A  | 5338  | PLD2     | L |
| 2764 | GMFB  | 5594  | MAPK1    | L |
| 2764 | GMFB  | 5595  | MAPK3    | L |
| 2767 | GNA11 | 3356  | HTR2A    | L |
| 2767 | GNA11 | 4543  | MTNR1A   | L |
| 2767 | GNA11 | 5739  | PTGIR    | L |
| 2767 | GNA11 | 5998  | RGS3     | L |
| 2767 | GNA11 | 6915  | TBXA2R   | L |
| 2768 | GNA12 | 2782  | GNB1     | L |
| 2768 | GNA12 | 3320  | HSPCA    | L |
| 2768 | GNA12 | 5536  | PPP5C    | L |
| 2768 | GNA12 | 5578  | PRKCA    | L |
| 2768 | GNA12 | 5922  | RASA2    | L |
| 2768 | GNA12 | 6915  | TBXA2R   | L |
| 2768 | GNA12 | 7006  | TEC      | L |
| 2768 | GNA12 | 7253  | TSHR     | L |
| 2768 | GNA12 | 8698  | EDG6     | L |
| 2768 | GNA12 | 9826  | ARHGEF11 | L |
| 2768 | GNA12 | 23365 | ARHGEF12 | L |
| 2769 | GNA15 | 3577  | IL8RA    | L |
| 2769 | GNA15 | 3579  | IL8RB    | L |
| 2769 | GNA15 | 4985  | OPRD1    | L |
| 2769 | GNA15 | 4986  | OPRK1    | L |
| 2769 | GNA15 | 4988  | OPRM1    | L |
| 2769 | GNA15 | 5997  | RGS2     | L |
| 2769 | GNA15 | 7265  | TTC1     | L |
| 2769 | GNA15 | 59340 | HRH4     | L |
| 2770 | GNAI1 | 2825  | GPR1     | L |
| 2770 | GNAI1 | 2864  | GPR40    | L |
| 2770 | GNAI1 | 3356  | HTR2A    | L |
| 2770 | GNAI1 | 3480  | IGF1R    | L |
| 2770 | GNAI1 | 4935  | GPR143   | L |
| 2770 | GNAI1 | 4988  | OPRM1    | L |
| 2770 | GNAI1 | 5147  | PDE6D    | L |
| 2770 | GNAI1 | 5999  | RGS4     | L |
| 2770 | GNAI1 | 6000  | RGS7     | L |
| 2770 | GNAI1 | 6001  | RGS10    | L |
| 2770 | GNAI1 | 6002  | RGS12    | L |
| 2770 | GNAI1 | 6752  | SSTR2    | L |
| 2770 | GNAI1 | 6753  | SSTR3    | L |
| 2770 | GNAI1 | 9294  | EDG5     | L |
| 2770 | GNAI1 | 10287 | RGS19    | L |
| 2770 | GNAI1 | 10636 | RGS14    | L |
| 2770 | GNAI1 | 51655 | RASD1    | L |

|      |       |       |        |   |
|------|-------|-------|--------|---|
| 2770 | GNAI1 | 53637 | EDG8   | L |
| 2770 | GNAI1 | 58157 | NGB    | L |
| 2770 | GNAI1 | 59340 | HRH4   | L |
| 2770 | GNAI1 | 64407 | RGS18  | L |
| 2771 | GNAI2 | 3480  | IGF1R  | L |
| 2771 | GNAI2 | 3576  | IL8    | L |
| 2771 | GNAI2 | 3577  | IL8RA  | L |
| 2771 | GNAI2 | 3973  | LHCGR  | L |
| 2771 | GNAI2 | 4188  | MDFI   | R |
| 2771 | GNAI2 | 4543  | MTNR1A | L |
| 2771 | GNAI2 | 4924  | NUCB1  | L |
| 2771 | GNAI2 | 4985  | OPRD1  | L |
| 2771 | GNAI2 | 4988  | OPRM1  | L |
| 2771 | GNAI2 | 5359  | PLSCR1 | R |
| 2771 | GNAI2 | 5999  | RGS4   | L |
| 2771 | GNAI2 | 6002  | RGS12  | L |
| 2771 | GNAI2 | 8490  | RGS5   | L |
| 2771 | GNAI2 | 10287 | RGS19  | L |
| 2771 | GNAI2 | 10636 | RGS14  | L |
| 2771 | GNAI2 | 22142 | (null) | S |
| 2771 | GNAI2 | 23566 | EDG7   | L |
| 2771 | GNAI2 | 29899 | GPSM2  | L |
| 2771 | GNAI2 | 51655 | RASD1  | L |
| 2771 | GNAI2 | 58157 | NGB    | L |
| 2771 | GNAI2 | 64407 | RGS18  | L |
| 2771 | GNAI2 | 64805 | P2RY12 | L |
| 2773 | GNAI3 | 4543  | MTNR1A | L |
| 2773 | GNAI3 | 5998  | RGS3   | L |
| 2773 | GNAI3 | 6000  | RGS7   | L |
| 2773 | GNAI3 | 6001  | RGS10  | L |
| 2773 | GNAI3 | 6002  | RGS12  | L |
| 2773 | GNAI3 | 6004  | RGS16  | L |
| 2773 | GNAI3 | 8490  | RGS5   | L |
| 2773 | GNAI3 | 10287 | RGS19  | L |
| 2773 | GNAI3 | 10636 | RGS14  | L |
| 2773 | GNAI3 | 29899 | GPSM2  | L |
| 2773 | GNAI3 | 58157 | NGB    | L |
| 2773 | GNAI3 | 64407 | RGS18  | L |
| 2775 | GNAO1 | 2867  | GPR43  | L |
| 2775 | GNAO1 | 3355  | HTR1F  | L |
| 2775 | GNAO1 | 4985  | OPRD1  | L |
| 2775 | GNAO1 | 4988  | OPRM1  | L |
| 2775 | GNAO1 | 5999  | RGS4   | L |
| 2775 | GNAO1 | 6000  | RGS7   | L |
| 2775 | GNAO1 | 6334  | SCN8A  | L |
| 2775 | GNAO1 | 8490  | RGS5   | L |
| 2775 | GNAO1 | 10287 | RGS19  | L |
| 2775 | GNAO1 | 10540 | DCTN2  | S |
| 2775 | GNAO1 | 10636 | RGS14  | L |
| 2775 | GNAO1 | 29899 | GPSM2  | L |
| 2775 | GNAO1 | 53637 | EDG8   | L |
| 2775 | GNAO1 | 58157 | NGB    | L |
| 2775 | GNAO1 | 59340 | HRH4   | L |
| 2776 | GNAQ  | 2864  | GPR40  | L |
| 2776 | GNAQ  | 2867  | GPR43  | L |
| 2776 | GNAQ  | 2912  | GRM2   | L |
| 2776 | GNAQ  | 2914  | GRM4   | L |
| 2776 | GNAQ  | 2917  | GRM7   | L |
| 2776 | GNAQ  | 3356  | HTR2A  | L |
| 2776 | GNAQ  | 3357  | HTR2B  | L |
| 2776 | GNAQ  | 3362  | HTR6   | L |
| 2776 | GNAQ  | 5290  | PIK3CA | L |
| 2776 | GNAQ  | 5330  | PLCB2  | L |
| 2776 | GNAQ  | 5739  | PTGIR  | L |
| 2776 | GNAQ  | 5997  | RGS2   | L |
| 2776 | GNAQ  | 5999  | RGS4   | L |
| 2776 | GNAQ  | 6000  | RGS7   | L |

|      |        |       |          |    |
|------|--------|-------|----------|----|
| 2776 | GNAQ   | 6915  | TBXA2R   | L  |
| 2776 | GNAQ   | 7265  | TTC1     | L  |
| 2776 | GNAQ   | 7433  | VIPR1    | L  |
| 2776 | GNAQ   | 8490  | RGS5     | L  |
| 2776 | GNAQ   | 8811  | GALR2    | L  |
| 2776 | GNAQ   | 9294  | EDG5     | L  |
| 2776 | GNAQ   | 9368  | SLC9A3R1 | L  |
| 2776 | GNAQ   | 11214 | AKAP13   | L  |
| 2776 | GNAQ   | 23236 | PLCB1    | L  |
| 2776 | GNAQ   | 64407 | RGS18    | L  |
| 2778 | GNAS   | 2782  | GNB1     | L  |
| 2778 | GNAS   | 3362  | HTR6     | L  |
| 2778 | GNAS   | 3973  | LHCGR    | L  |
| 2778 | GNAS   | 5729  | PTGDR    | L  |
| 2778 | GNAS   | 5739  | PTGIR    | L  |
| 2778 | GNAS   | 5997  | RGS2     | L  |
| 2778 | GNAS   | 7265  | TTC1     | L  |
| 2778 | GNAS   | 7433  | VIPR1    | L  |
| 2778 | GNAS   | 23161 | SNX13    | L  |
| 2778 | GNAS   | 55188 | RIC8B    | L  |
| 2778 | GNAS   | 58473 | PLEKHB1  | L  |
| 2781 | GNAZ   | 4985  | OPRD1    | L  |
| 2781 | GNAZ   | 5909  | RAP1GA1  | L  |
| 2781 | GNAZ   | 6000  | RGS7     | L  |
| 2781 | GNAZ   | 6001  | RGS10    | L  |
| 2781 | GNAZ   | 8601  | RGS20    | L  |
| 2781 | GNAZ   | 10287 | RGS19    | L  |
| 2782 | GNB1   | 2788  | GNG7     | L  |
| 2782 | GNB1   | 2790  | GNG10    | L  |
| 2782 | GNB1   | 2792  | GNGT1    | L  |
| 2782 | GNB1   | 10399 | GNB2L1   | L  |
| 2783 | GNB2   | 2792  | GNGT1    | L  |
| 2784 | GNB3   | 2792  | GNGT1    | L  |
| 2788 | GNG7   | 4356  | MPP3     | S  |
| 2788 | GNG7   | 10681 | GNB5     | L  |
| 2788 | GNG7   | 51205 | ACP6     | S  |
| 2790 | GNG10  | 8844  | KSR      | L  |
| 2791 | GNG11  | 11244 | ZHX1     | S  |
| 2791 | GNG11  | 51421 | AMOTL2   | R  |
| 2792 | GNGT1  | 6010  | RHO      | L  |
| 2792 | GNGT1  | 58473 | PLEKHB1  | L  |
| 2793 | GNGT2  | 3761  | KCNJ4    | L  |
| 2796 | GNRH1  | 2798  | GNRHR    | L  |
| 2798 | GNRHR  | 6001  | RGS10    | L  |
| 2800 | GOLGA1 | 5870  | RAB6A    | L  |
| 2801 | GOLGA2 | 2874  | GPS2     | S  |
| 2801 | GOLGA2 | 3983  | ABLIM1   | R  |
| 2801 | GOLGA2 | 5861  | RAB1A    | L  |
| 2801 | GOLGA2 | 5862  | RAB2     | RL |
| 2801 | GOLGA2 | 9883  | POM121   | R  |
| 2801 | GOLGA2 | 23650 | TRIM29   | R  |
| 2801 | GOLGA2 | 26003 | GORASP2  | L  |
| 2801 | GOLGA2 | 27229 | 76P      | R  |
| 2801 | GOLGA2 | 58500 | ZNF250   | R  |
| 2801 | GOLGA2 | 64689 | GORASP1  | L  |
| 2801 | GOLGA2 | 81876 | RAB1B    | L  |
| 2801 | GOLGA2 | 83452 | RAB33B   | L  |
| 2801 | GOLGA2 | 84622 | ZNF594   | S  |
| 2803 | GOLGA4 | 23499 | MACF1    | L  |
| 2804 | GOLGB1 | 4694  | NDUFA1   | S  |
| 2804 | GOLGB1 | 5217  | PFN2     | S  |
| 2804 | GOLGB1 | 6498  | SKIL     | L  |
| 2804 | GOLGB1 | 6515  | SLC2A3   | S  |
| 2804 | GOLGB1 | 8615  | VDP      | L  |
| 2804 | GOLGB1 | 10490 | VT11B    | S  |
| 2804 | GOLGB1 | 25855 | BRMS1    | S  |
| 2804 | GOLGB1 | 57562 | KIAA1377 | S  |

|      |        |        |           |   |
|------|--------|--------|-----------|---|
| 2804 | GOLGB1 | 64746  | ACBD3     | L |
| 2804 | GOLGB1 | 362598 | (null)    | S |
| 2805 | GOT1   | 83862  | TMPIT     | S |
| 2806 | GOT2   | 3312   | HSPA8     | L |
| 2806 | GOT2   | 4191   | MDH2      | L |
| 2806 | GOT2   | 64429  | ZDHHC6    | S |
| 2806 | GOT2   | 80145  | NIF3L1BP1 | S |
| 2810 | SFN    | 2908   | NR3C1     | L |
| 2810 | SFN    | 3875   | KRT18     | L |
| 2810 | SFN    | 4140   | MARK3     | R |
| 2810 | SFN    | 7538   | ZFP36     | L |
| 2810 | SFN    | 7706   | TRIM25    | L |
| 2810 | SFN    | 8534   | CHST1     | R |
| 2810 | SFN    | 9413   | C9orf61   | R |
| 2810 | SFN    | 9721   | KIAA0514  | R |
| 2810 | SFN    | 9729   | KIAA0408  | R |
| 2810 | SFN    | 10014  | HDAC5     | L |
| 2810 | SFN    | 10607  | TBL3      | R |
| 2810 | SFN    | 10733  | PLK4      | R |
| 2810 | SFN    | 55093  | C8orf32   | R |
| 2810 | SFN    | 55749  | CCAR1     | L |
| 2810 | SFN    | 79666  | PLEKHF2   | R |
| 2811 | GP1BA  | 2814   | GP5       | L |
| 2811 | GP1BA  | 3684   | ITGAM     | L |
| 2811 | GP1BA  | 3827   | KNG1      | L |
| 2811 | GP1BA  | 6403   | SELP      | L |
| 2811 | GP1BA  | 7450   | VWF       | L |
| 2811 | GP1BA  | 7534   | YWHAZ     | L |
| 2811 | GP1BA  | 55644  | OSGEP     | L |
| 2812 | GP1BB  | 7534   | YWHAZ     | L |
| 2817 | GPC1   | 6585   | SLIT1     | L |
| 2817 | GPC1   | 7422   | VEGF      | L |
| 2817 | GPC1   | 9353   | SLIT2     | L |
| 2817 | GPC1   | 80781  | COL18A1   | L |
| 2819 | GPD1   | 4190   | MDH1      | L |
| 2819 | GPD1   | 5764   | PTN       | S |
| 2826 | CCR10  | 6347   | CCL2      | L |
| 2826 | CCR10  | 6354   | CCL7      | L |
| 2826 | CCR10  | 7916   | BAT2      | L |
| 2826 | CCR10  | 10850  | CCL27     | L |
| 2826 | CCR10  | 56477  | CCL28     | L |
| 2829 | XCR1   | 6375   | XCL1      | L |
| 2829 | XCR1   | 6846   | XCL2      | L |
| 2831 | GPR7   | 6129   | RPL7      | L |
| 2833 | CXCR3  | 3627   | CXCL10    | L |
| 2833 | CXCR3  | 4283   | CXCL9     | L |
| 2833 | CXCR3  | 5196   | PF4       | L |
| 2833 | CXCR3  | 6373   | CXCL11    | L |
| 2833 | CXCR3  | 10563  | CXCL13    | L |
| 2834 | GPR10  | 51052  | PRLH      | L |
| 2837 | UTS2R  | 10911  | UTS2      | L |
| 2840 | GPR17  | 10672  | GNA13     | L |
| 2849 | GPR26  | 3350   | HTR1A     | L |
| 2861 | GPR37  | 5071   | PARK2     | L |
| 2861 | GPR37  | 10273  | STUB1     | L |
| 2862 | MLNR   | 51738  | GHRL      | L |
| 2869 | GRK5   | 5957   | RCV1      | L |
| 2869 | GRK5   | 6010   | RHO       | L |
| 2869 | GRK5   | 6623   | SNCG      | L |
| 2869 | GRK5   | 6869   | TACR1     | L |
| 2869 | GRK5   | 6915   | TBXA2R    | L |
| 2869 | GRK5   | 28964  | GIT1      | L |
| 2870 | GRK6   | 5957   | RCV1      | L |
| 2870 | GRK6   | 6010   | RHO       | L |
| 2870 | GRK6   | 6915   | TBXA2R    | L |
| 2870 | GRK6   | 9368   | SLC9A3R1  | L |
| 2870 | GRK6   | 11098  | PRSS23    | S |

|      |       |       |          |   |
|------|-------|-------|----------|---|
| 2870 | GRK6  | 28964 | GIT1     | L |
| 2872 | MKNK2 | 5594  | MAPK1    | L |
| 2873 | GPS1  | 79735 | TBC1D17  | S |
| 2874 | GPS2  | 7157  | TP53     | L |
| 2874 | GPS2  | 8900  | CCNA1    | L |
| 2874 | GPS2  | 9869  | SETDB1   | S |
| 2874 | GPS2  | 54908 | FLJ20364 | S |
| 2874 | GPS2  | 55872 | PBK      | S |
| 2874 | GPS2  | 56911 | C21orf7  | R |
| 2874 | GPS2  | 79173 | MGC11271 | R |
| 2882 | GPX7  | 6449  | SGTA     | R |
| 2885 | GRB2  | 2886  | GRB7     | L |
| 2885 | GRB2  | 2889  | RAPGEF1  | L |
| 2885 | GRB2  | 3064  | HD       | L |
| 2885 | GRB2  | 3183  | HNRPC    | L |
| 2885 | GRB2  | 3265  | HRAS     | L |
| 2885 | GRB2  | 3560  | IL2RB    | L |
| 2885 | GRB2  | 3635  | INPP5D   | L |
| 2885 | GRB2  | 3655  | ITGA6    | L |
| 2885 | GRB2  | 3667  | IRS1     | L |
| 2885 | GRB2  | 3674  | ITGA2B   | L |
| 2885 | GRB2  | 3691  | ITGB4    | L |
| 2885 | GRB2  | 3702  | ITK      | L |
| 2885 | GRB2  | 3716  | JAK1     | L |
| 2885 | GRB2  | 3717  | JAK2     | L |
| 2885 | GRB2  | 3791  | KDR      | L |
| 2885 | GRB2  | 3815  | KIT      | L |
| 2885 | GRB2  | 4133  | MAP2     | L |
| 2885 | GRB2  | 4233  | MET      | L |
| 2885 | GRB2  | 4486  | MST1R    | L |
| 2885 | GRB2  | 4582  | MUC1     | L |
| 2885 | GRB2  | 4914  | NTRK1    | L |
| 2885 | GRB2  | 4952  | OCRL     | L |
| 2885 | GRB2  | 5058  | PAK1     | L |
| 2885 | GRB2  | 5148  | PDE6G    | L |
| 2885 | GRB2  | 5159  | PDGFRB   | L |
| 2885 | GRB2  | 5287  | PIK3C2B  | L |
| 2885 | GRB2  | 5295  | PIK3R1   | L |
| 2885 | GRB2  | 5296  | PIK3R2   | L |
| 2885 | GRB2  | 5335  | PLCG1    | L |
| 2885 | GRB2  | 5573  | PRKAR1A  | L |
| 2885 | GRB2  | 5621  | PRNP     | L |
| 2885 | GRB2  | 5716  | PSMD10   | L |
| 2885 | GRB2  | 5747  | PTK2     | L |
| 2885 | GRB2  | 5770  | PTPN1    | L |
| 2885 | GRB2  | 5777  | PTPN6    | L |
| 2885 | GRB2  | 5781  | PTPN11   | L |
| 2885 | GRB2  | 5782  | PTPN12   | L |
| 2885 | GRB2  | 5786  | PTPRA    | L |
| 2885 | GRB2  | 5788  | PTPRC    | L |
| 2885 | GRB2  | 5791  | PTPRE    | L |
| 2885 | GRB2  | 5913  | RAPSN    | L |
| 2885 | GRB2  | 5921  | RASA1    | L |
| 2885 | GRB2  | 5979  | RET      | L |
| 2885 | GRB2  | 6300  | MAPK12   | L |
| 2885 | GRB2  | 6352  | CCL5     | L |
| 2885 | GRB2  | 6402  | SELL     | L |
| 2885 | GRB2  | 6442  | SGCA     | L |
| 2885 | GRB2  | 6452  | SH3BP2   | L |
| 2885 | GRB2  | 6461  | SHB      | L |
| 2885 | GRB2  | 6640  | SNTA1    | L |
| 2885 | GRB2  | 6654  | SOS1     | L |
| 2885 | GRB2  | 6655  | SOS2     | L |
| 2885 | GRB2  | 6714  | SRC      | L |
| 2885 | GRB2  | 6850  | SYK      | L |
| 2885 | GRB2  | 6853  | SYN1     | L |
| 2885 | GRB2  | 7010  | TEK      | L |

|      |       |        |          |   |
|------|-------|--------|----------|---|
| 2885 | GRB2  | 7132   | TNFRSF1A | L |
| 2885 | GRB2  | 7275   | TUB      | L |
| 2885 | GRB2  | 7409   | VAV1     | L |
| 2885 | GRB2  | 7410   | VAV2     | L |
| 2885 | GRB2  | 7454   | WAS      | L |
| 2885 | GRB2  | 7462   | LAT2     | L |
| 2885 | GRB2  | 7916   | BAT2     | L |
| 2885 | GRB2  | 8038   | ADAM12   | L |
| 2885 | GRB2  | 8471   | IRS4     | L |
| 2885 | GRB2  | 8626   | TP73L    | L |
| 2885 | GRB2  | 8631   | SCAP1    | L |
| 2885 | GRB2  | 8651   | SOCS1    | L |
| 2885 | GRB2  | 8660   | IRS2     | L |
| 2885 | GRB2  | 8751   | ADAM15   | L |
| 2885 | GRB2  | 8867   | SYNJ1    | L |
| 2885 | GRB2  | 8871   | SYNJ2    | L |
| 2885 | GRB2  | 8936   | WASF1    | L |
| 2885 | GRB2  | 8976   | WASL     | L |
| 2885 | GRB2  | 9101   | USP8     | L |
| 2885 | GRB2  | 9112   | MTA1     | L |
| 2885 | GRB2  | 9185   | REPS2    | L |
| 2885 | GRB2  | 9564   | BCAR1    | L |
| 2885 | GRB2  | 9649   | RALGPS1  | L |
| 2885 | GRB2  | 9712   | USP6NL   | L |
| 2885 | GRB2  | 9846   | GAB2     | L |
| 2885 | GRB2  | 10019  | LNK      | L |
| 2885 | GRB2  | 10040  | TOM1L1   | L |
| 2885 | GRB2  | 10163  | WASF2    | L |
| 2885 | GRB2  | 10188  | TNK2     | L |
| 2885 | GRB2  | 10252  | SPRY1    | L |
| 2885 | GRB2  | 10253  | SPRY2    | L |
| 2885 | GRB2  | 10451  | VAV3     | L |
| 2885 | GRB2  | 10461  | MERTK    | L |
| 2885 | GRB2  | 10657  | KHDRBS1  | L |
| 2885 | GRB2  | 10817  | FRS3     | L |
| 2885 | GRB2  | 10818  | FRS2     | L |
| 2885 | GRB2  | 10825  | NEU3     | L |
| 2885 | GRB2  | 11184  | MAP4K1   | L |
| 2885 | GRB2  | 23607  | CD2AP    | L |
| 2885 | GRB2  | 23624  | CBLC     | L |
| 2885 | GRB2  | 26191  | PTPN22   | L |
| 2885 | GRB2  | 27036  | SIGLEC7  | L |
| 2885 | GRB2  | 27040  | LAT      | L |
| 2885 | GRB2  | 27240  | SIT1     | L |
| 2885 | GRB2  | 29760  | BLNK     | L |
| 2885 | GRB2  | 30011  | SH3KBP1  | L |
| 2885 | GRB2  | 51517  | NCKIPSD  | L |
| 2885 | GRB2  | 54900  | LAX1     | L |
| 2885 | GRB2  | 55824  | PAG1     | L |
| 2885 | GRB2  | 85021  | REPS1    | L |
| 2885 | GRB2  | 139716 | GAB3     | L |
| 2886 | GRB7  | 3643   | INSR     | L |
| 2886 | GRB7  | 3815   | KIT      | L |
| 2886 | GRB7  | 5747   | PTK2     | L |
| 2886 | GRB7  | 5979   | RET      | L |
| 2886 | GRB7  | 7010   | TEK      | L |
| 2887 | GRB10 | 3480   | IGF1R    | L |
| 2887 | GRB10 | 3643   | INSR     | L |
| 2887 | GRB10 | 3717   | JAK2     | L |
| 2887 | GRB10 | 3791   | KDR      | L |
| 2887 | GRB10 | 3815   | KIT      | L |
| 2887 | GRB10 | 4734   | NEDD4    | L |
| 2887 | GRB10 | 5159   | PDGFRB   | L |
| 2887 | GRB10 | 5604   | MAP2K1   | L |
| 2887 | GRB10 | 5894   | RAF1     | L |
| 2887 | GRB10 | 5979   | RET      | L |
| 2887 | GRB10 | 26058  | TNRC15   | L |

|      |         |        |          |   |
|------|---------|--------|----------|---|
| 2887 | GRB10   | 64599  | PERQ1    | L |
| 2888 | GRB14   | 3643   | INSR     | L |
| 2888 | GRB14   | 5156   | PDGFRA   | L |
| 2888 | GRB14   | 5159   | PDGFRB   | L |
| 2888 | GRB14   | 5590   | PRKCZ    | L |
| 2888 | GRB14   | 7010   | TEK      | L |
| 2888 | GRB14   | 80351  | TNKS2    | L |
| 2889 | RAPGEF1 | 3055   | HCK      | L |
| 2889 | RAPGEF1 | 5156   | PDGFRA   | L |
| 2889 | RAPGEF1 | 6464   | SHC1     | L |
| 2889 | RAPGEF1 | 9564   | BCAR1    | L |
| 2889 | RAPGEF1 | 22800  | RRAS2    | L |
| 2890 | GRIA1   | 2893   | GRIA4    | L |
| 2890 | GRIA1   | 2895   | GRID2    | L |
| 2890 | GRIA1   | 2898   | GRIK2    | L |
| 2890 | GRIA1   | 3309   | HSPA5    | L |
| 2890 | GRIA1   | 6386   | SDCBP    | L |
| 2890 | GRIA1   | 9456   | HOMER1   | L |
| 2890 | GRIA1   | 10369  | CACNG2   | L |
| 2891 | GRIA2   | 6386   | SDCBP    | L |
| 2891 | GRIA2   | 6709   | SPTAN1   | L |
| 2892 | GRIA3   | 4067   | LYN      | L |
| 2892 | GRIA3   | 5496   | PPM1G    | L |
| 2892 | GRIA3   | 6386   | SDCBP    | L |
| 2893 | GRIA4   | 5582   | PRKCG    | L |
| 2893 | GRIA4   | 6386   | SDCBP    | L |
| 2895 | GRID2   | 2898   | GRIK2    | L |
| 2895 | GRID2   | 2901   | GRIK5    | L |
| 2895 | GRID2   | 5775   | PTPN4    | L |
| 2895 | GRID2   | 57120  | GOPC     | L |
| 2896 | GRN     | 3101   | HK3      | L |
| 2896 | GRN     | 3198   | HOXA1    | R |
| 2896 | GRN     | 3339   | HSPG2    | L |
| 2896 | GRN     | 4093   | SMAD9    | L |
| 2896 | GRN     | 6590   | SLPI     | L |
| 2896 | GRN     | 8788   | DLK1     | L |
| 2896 | GRN     | 8940   | TOP3B    | L |
| 2896 | GRN     | 348487 | C1orf117 | R |
| 2897 | GRIK1   | 6386   | SDCBP    | L |
| 2897 | GRIK1   | 9456   | HOMER1   | L |
| 2898 | GRIK2   | 2900   | GRIK4    | L |
| 2898 | GRIK2   | 2901   | GRIK5    | L |
| 2898 | GRIK2   | 6386   | SDCBP    | L |
| 2898 | GRIK2   | 8573   | CASK     | L |
| 2899 | GRIK3   | 2901   | GRIK5    | L |
| 2901 | GRIK5   | 4291   | MLF1     | S |
| 2901 | GRIK5   | 8733   | GPAA1    | S |
| 2901 | GRIK5   | 51280  | GOLPH2   | S |
| 2901 | GRIK5   | 90678  | LRSAM1   | S |
| 2902 | GRIN1   | 2903   | GRIN2A   | L |
| 2903 | GRIN2A  | 3603   | IL16     | L |
| 2903 | GRIN2A  | 5775   | PTPN4    | L |
| 2903 | GRIN2A  | 6714   | SRC      | L |
| 2903 | GRIN2A  | 9229   | DLGAP1   | L |
| 2903 | GRIN2A  | 10207  | INADL    | L |
| 2904 | GRIN2B  | 3603   | IL16     | L |
| 2904 | GRIN2B  | 5071   | PARK2    | L |
| 2904 | GRIN2B  | 6714   | SRC      | L |
| 2904 | GRIN2B  | 8825   | LIN7A    | L |
| 2904 | GRIN2B  | 10207  | INADL    | L |
| 2904 | GRIN2B  | 10399  | GNB2L1   | L |
| 2904 | GRIN2B  | 260425 | MAGI3    | L |
| 2905 | GRIN2C  | 3603   | IL16     | L |
| 2905 | GRIN2C  | 10207  | INADL    | L |
| 2906 | GRIN2D  | 3603   | IL16     | L |
| 2906 | GRIN2D  | 10207  | INADL    | L |
| 2908 | NR3C1   | 3175   | ONECUT1  | L |



|      |       |       |           |   |
|------|-------|-------|-----------|---|
| 2908 | NR3C1 | 3192  | HNRPU     | L |
| 2908 | NR3C1 | 3211  | HOXB1     | L |
| 2908 | NR3C1 | 3320  | HSPCA     | L |
| 2908 | NR3C1 | 3416  | IDE       | L |
| 2908 | NR3C1 | 3557  | IL1RN     | L |
| 2908 | NR3C1 | 4088  | SMAD3     | L |
| 2908 | NR3C1 | 4306  | NR3C2     | L |
| 2908 | NR3C1 | 4691  | NCL       | L |
| 2908 | NR3C1 | 4790  | NFKB1     | L |
| 2908 | NR3C1 | 4791  | NFKB2     | L |
| 2908 | NR3C1 | 5087  | PBX1      | L |
| 2908 | NR3C1 | 5449  | POU1F1    | L |
| 2908 | NR3C1 | 5452  | POU2F2    | L |
| 2908 | NR3C1 | 5763  | PTMS      | L |
| 2908 | NR3C1 | 5894  | RAF1      | L |
| 2908 | NR3C1 | 5927  | JARID1A   | L |
| 2908 | NR3C1 | 5970  | RELA      | L |
| 2908 | NR3C1 | 6595  | SMARCA2   | L |
| 2908 | NR3C1 | 6598  | SMARCB1   | L |
| 2908 | NR3C1 | 6602  | SMARCD1   | L |
| 2908 | NR3C1 | 6605  | SMARCE1   | L |
| 2908 | NR3C1 | 6774  | STAT3     | L |
| 2908 | NR3C1 | 6776  | STAT5A    | L |
| 2908 | NR3C1 | 6777  | STAT5B    | L |
| 2908 | NR3C1 | 6908  | TBP       | L |
| 2908 | NR3C1 | 7041  | TGFB111   | L |
| 2908 | NR3C1 | 7157  | TP53      | L |
| 2908 | NR3C1 | 7251  | TSG101    | L |
| 2908 | NR3C1 | 7295  | TXN       | L |
| 2908 | NR3C1 | 7329  | UBE2I     | L |
| 2908 | NR3C1 | 7341  | SUMO1     | L |
| 2908 | NR3C1 | 7533  | YWHAH     | L |
| 2908 | NR3C1 | 7704  | ZBTB16    | L |
| 2908 | NR3C1 | 7818  | DAP3      | L |
| 2908 | NR3C1 | 8204  | NRIP1     | L |
| 2908 | NR3C1 | 8648  | NCOA1     | L |
| 2908 | NR3C1 | 8805  | TRIM24    | L |
| 2908 | NR3C1 | 8991  | SELENBP1  | L |
| 2908 | NR3C1 | 9282  | CRSP2     | L |
| 2908 | NR3C1 | 9604  | RNF14     | L |
| 2908 | NR3C1 | 9611  | NCOR1     | L |
| 2908 | NR3C1 | 9612  | NCOR2     | L |
| 2908 | NR3C1 | 10155 | TRIM28    | L |
| 2908 | NR3C1 | 10499 | NCOA2     | L |
| 2908 | NR3C1 | 10891 | PPARGC1A  | L |
| 2908 | NR3C1 | 11319 | HSGT1     | L |
| 2908 | NR3C1 | 23054 | NCOA6     | L |
| 2908 | NR3C1 | 24148 | C20orf14  | L |
| 2908 | NR3C1 | 27043 | PELP1     | L |
| 2911 | GRM1  | 3708  | ITPR1     | L |
| 2911 | GRM1  | 7280  | TUBB2     | L |
| 2911 | GRM1  | 9456  | HOMER1    | L |
| 2912 | GRM2  | 6002  | RGS12     | L |
| 2913 | GRM3  | 6386  | SDCBP     | L |
| 2915 | GRM5  | 6002  | RGS12     | L |
| 2917 | GRM7  | 7277  | TUBA1     | L |
| 2917 | GRM7  | 7278  | TUBA2     | L |
| 2917 | GRM7  | 7846  | TUBA3     | L |
| 2917 | GRM7  | 10376 | K-ALPHA-1 | L |
| 2917 | GRM7  | 51807 | TUBA8     | L |
| 2919 | CXCL1 | 3577  | IL8RA     | L |
| 2919 | CXCL1 | 3579  | IL8RB     | L |
| 2920 | CXCL2 | 3577  | IL8RA     | L |
| 2920 | CXCL2 | 3579  | IL8RB     | L |
| 2920 | CXCL2 | 5340  | PLG       | L |
| 2921 | CXCL3 | 3577  | IL8RA     | L |
| 2921 | CXCL3 | 3579  | IL8RB     | L |

|      |        |       |          |   |
|------|--------|-------|----------|---|
| 2922 | GRP    | 2925  | GRPR     | L |
| 2923 | PDIA3  | 2995  | GYPC     | L |
| 2923 | PDIA3  | 3105  | HLA-A    | L |
| 2923 | PDIA3  | 3458  | IFNG     | L |
| 2923 | PDIA3  | 5829  | PXN      | L |
| 2923 | PDIA3  | 6513  | SLC2A1   | L |
| 2923 | PDIA3  | 6559  | SLC12A3  | L |
| 2923 | PDIA3  | 6774  | STAT3    | L |
| 2923 | PDIA3  | 6890  | TAP1     | L |
| 2923 | PDIA3  | 7094  | TLN1     | L |
| 2923 | PDIA3  | 7414  | VCL      | L |
| 2928 | GSCL   | 6047  | RNF4     | L |
| 2932 | GSK3B  | 3611  | ILK      | L |
| 2932 | GSK3B  | 4137  | MAPT     | L |
| 2932 | GSK3B  | 4582  | MUC1     | L |
| 2932 | GSK3B  | 4790  | NFKB1    | L |
| 2932 | GSK3B  | 4851  | NOTCH1   | L |
| 2932 | GSK3B  | 4853  | NOTCH2   | L |
| 2932 | GSK3B  | 5540  | PPYR1    | L |
| 2932 | GSK3B  | 5579  | PRKCB1   | L |
| 2932 | GSK3B  | 5747  | PTK2     | L |
| 2932 | GSK3B  | 5770  | PTPN1    | L |
| 2932 | GSK3B  | 6615  | SNAI1    | L |
| 2932 | GSK3B  | 7157  | TP53     | L |
| 2932 | GSK3B  | 8312  | AXIN1    | L |
| 2932 | GSK3B  | 8313  | AXIN2    | L |
| 2932 | GSK3B  | 10023 | FRAT1    | L |
| 2932 | GSK3B  | 10059 | DNM1L    | L |
| 2932 | GSK3B  | 11215 | AKAP11   | L |
| 2932 | GSK3B  | 23401 | FRAT2    | L |
| 2932 | GSK3B  | 23678 | SGK3     | L |
| 2932 | GSK3B  | 51199 | NIN      | L |
| 2932 | GSK3B  | 65110 | UPF3A    | L |
| 2934 | GSN    | 3985  | LIMK2    | L |
| 2934 | GSN    | 5829  | PXN      | L |
| 2934 | GSN    | 7408  | VASP     | L |
| 2934 | GSN    | 7414  | VCL      | L |
| 2934 | GSN    | 7416  | VDAC1    | L |
| 2934 | GSN    | 9564  | BCAR1    | L |
| 2934 | GSN    | 10040 | TOM1L1   | S |
| 2934 | GSN    | 53405 | CLIC5    | L |
| 2935 | GSPT1  | 26986 | PABPC1   | L |
| 2936 | GSR    | 64219 | PJA1     | S |
| 2944 | GSTM1  | 2946  | GSTM2    | L |
| 2944 | GSTM1  | 4217  | MAP3K5   | L |
| 2946 | GSTM2  | 2947  | GSTM3    | L |
| 2948 | GSTM4  | 7088  | TLE1     | S |
| 2948 | GSTM4  | 7704  | ZBTB16   | S |
| 2948 | GSTM4  | 51003 | MED31    | S |
| 2948 | GSTM4  | 51497 | TH1L     | S |
| 2948 | GSTM4  | 55791 | C1orf103 | S |
| 2948 | GSTM4  | 84966 | IGSF21   | S |
| 2950 | GSTP1  | 5599  | MAPK8    | L |
| 2950 | GSTP1  | 5764  | PTN      | S |
| 2950 | GSTP1  | 56902 | LOC56902 | S |
| 2956 | MSH6   | 5111  | PCNA     | L |
| 2957 | GTF2A1 | 2958  | GTF2A2   | L |
| 2957 | GTF2A1 | 2959  | GTF2B    | L |
| 2957 | GTF2A1 | 2960  | GTF2E1   | L |
| 2957 | GTF2A1 | 2961  | GTF2E2   | L |
| 2957 | GTF2A1 | 2962  | GTF2F1   | L |
| 2957 | GTF2A1 | 6908  | TBP      | L |
| 2957 | GTF2A1 | 9325  | TRIP4    | L |
| 2957 | GTF2A1 | 9519  | TBPL1    | L |
| 2958 | GTF2A2 | 2960  | GTF2E1   | L |
| 2958 | GTF2A2 | 3297  | HSF1     | L |
| 2958 | GTF2A2 | 6908  | TBP      | L |

|      |        |        |          |   |
|------|--------|--------|----------|---|
| 2958 | GTF2A2 | 9519   | TBPL1    | L |
| 2958 | GTF2A2 | 11036  | ALF      | L |
| 2959 | GTF2B  | 2960   | GTF2E1   | L |
| 2959 | GTF2B  | 2961   | GTF2E2   | L |
| 2959 | GTF2B  | 2962   | GTF2F1   | L |
| 2959 | GTF2B  | 2963   | GTF2F2   | L |
| 2959 | GTF2B  | 3297   | HSF1     | L |
| 2959 | GTF2B  | 4171   | MCM2     | L |
| 2959 | GTF2B  | 6908   | TBP      | L |
| 2959 | GTF2B  | 7025   | NR2F1    | L |
| 2959 | GTF2B  | 7421   | VDR      | L |
| 2959 | GTF2B  | 8031   | NCOA4    | L |
| 2959 | GTF2B  | 8202   | NCOA3    | L |
| 2959 | GTF2B  | 8648   | NCOA1    | L |
| 2959 | GTF2B  | 9221   | NOLC1    | L |
| 2959 | GTF2B  | 9519   | TBPL1    | L |
| 2959 | GTF2B  | 10320  | ZNFN1A1  | L |
| 2960 | GTF2E1 | 2961   | GTF2E2   | L |
| 2960 | GTF2E1 | 2963   | GTF2F2   | L |
| 2960 | GTF2E1 | 2965   | GTF2H1   | L |
| 2960 | GTF2E1 | 2968   | GTF2H4   | L |
| 2960 | GTF2E1 | 6878   | TAF6     | L |
| 2960 | GTF2E1 | 6908   | TBP      | L |
| 2960 | GTF2E1 | 6917   | TCEA1    | L |
| 2960 | GTF2E1 | 8805   | TRIM24   | L |
| 2960 | GTF2E1 | 27044  | SND1     | L |
| 2961 | GTF2E2 | 2962   | GTF2F1   | L |
| 2961 | GTF2E2 | 2963   | GTF2F2   | L |
| 2961 | GTF2E2 | 2965   | GTF2H1   | L |
| 2961 | GTF2E2 | 4193   | MDM2     | L |
| 2961 | GTF2E2 | 4331   | MNAT1    | L |
| 2961 | GTF2E2 | 6908   | TBP      | L |
| 2961 | GTF2E2 | 7507   | XPA      | L |
| 2961 | GTF2E2 | 23636  | NUP62    | L |
| 2961 | GTF2E2 | 27044  | SND1     | L |
| 2961 | GTF2E2 | 55729  | ATF7IP   | L |
| 2962 | GTF2F1 | 2963   | GTF2F2   | L |
| 2962 | GTF2F1 | 4488   | MSX2     | L |
| 2962 | GTF2F1 | 4609   | MYC      | L |
| 2962 | GTF2F1 | 5701   | PSMC2    | L |
| 2962 | GTF2F1 | 5764   | PTN      | S |
| 2962 | GTF2F1 | 6722   | SRF      | L |
| 2962 | GTF2F1 | 9150   | CTDP1    | L |
| 2962 | GTF2F1 | 9638   | FEZ1     | S |
| 2962 | GTF2F1 | 55729  | ATF7IP   | L |
| 2962 | GTF2F1 | 58190  | CTDSP1   | L |
| 2963 | GTF2F2 | 3725   | JUN      | L |
| 2963 | GTF2F2 | 4488   | MSX2     | L |
| 2963 | GTF2F2 | 5430   | POLR2A   | L |
| 2963 | GTF2F2 | 6908   | TBP      | L |
| 2963 | GTF2F2 | 27336  | HTATSF1  | L |
| 2965 | GTF2H1 | 3192   | HNRPU    | L |
| 2965 | GTF2H1 | 4171   | MCM2     | L |
| 2965 | GTF2H1 | 5430   | POLR2A   | L |
| 2965 | GTF2H1 | 5701   | PSMC2    | L |
| 2965 | GTF2H1 | 7157   | TP53     | L |
| 2965 | GTF2H1 | 8880   | FUBP1    | L |
| 2965 | GTF2H1 | 54462  | KIAA1128 | S |
| 2965 | GTF2H1 | 55729  | ATF7IP   | L |
| 2965 | GTF2H1 | 63971  | KIF13A   | L |
| 2965 | GTF2H1 | 404672 | GTF2H5   | L |
| 2966 | GTF2H2 | 404672 | GTF2H5   | L |
| 2967 | GTF2H3 | 404672 | GTF2H5   | L |
| 2968 | GTF2H4 | 404672 | GTF2H5   | L |
| 2969 | GTF2I  | 4609   | MYC      | L |
| 2969 | GTF2I  | 5396   | PRRX1    | L |
| 2969 | GTF2I  | 5592   | PRKG1    | L |

|      |         |       |           |    |
|------|---------|-------|-----------|----|
| 2969 | GTF2I   | 5595  | MAPK3     | L  |
| 2969 | GTF2I   | 6722  | SRF       | L  |
| 2969 | GTF2I   | 6772  | STAT1     | L  |
| 2969 | GTF2I   | 6774  | STAT3     | L  |
| 2969 | GTF2I   | 7391  | USF1      | L  |
| 2969 | GTF2I   | 7528  | YY1       | L  |
| 2969 | GTF2I   | 7709  | ZBTB17    | L  |
| 2969 | GTF2I   | 8841  | HDAC3     | L  |
| 2969 | GTF2I   | 9063  | PIAS2     | L  |
| 2969 | GTF2I   | 51691 | LSM8      | L  |
| 2971 | GTF3A   | 2976  | GTF3C2    | L  |
| 2971 | GTF3A   | 10133 | OPTN      | L  |
| 2972 | BRF1    | 5933  | RBL1      | L  |
| 2972 | BRF1    | 6908  | TBP       | L  |
| 2972 | BRF1    | 7157  | TP53      | L  |
| 2975 | GTF3C1  | 3486  | IGFBP3    | S  |
| 2975 | GTF3C1  | 4809  | NHP2L1    | S  |
| 2975 | GTF3C1  | 5602  | MAPK10    | S  |
| 2975 | GTF3C1  | 9191  | DEDD      | L  |
| 2975 | GTF3C1  | 20924 | (null)    | S  |
| 2975 | GTF3C1  | 51236 | C8orf30A  | S  |
| 2975 | GTF3C1  | 55147 | RBM23     | S  |
| 2975 | GTF3C1  | 64400 | FTS       | S  |
| 2975 | GTF3C1  | 79735 | TBC1D17   | S  |
| 2975 | GTF3C1  | 84164 | ASCC2     | S  |
| 2975 | GTF3C1  | 84950 | PRPF38A   | S  |
| 2976 | GTF3C2  | 5925  | RB1       | L  |
| 2977 | GUCY1A2 | 2983  | GUCY1B3   | L  |
| 2979 | GUCA1B  | 2986  | GUCY2F    | L  |
| 2979 | GUCA1B  | 3000  | GUCY2D    | L  |
| 2980 | GUCA2A  | 2984  | GUCY2C    | L  |
| 2981 | GUCA2B  | 3000  | GUCY2D    | L  |
| 2983 | GUCY1B3 | 3320  | HSPCA     | L  |
| 2984 | GUCY2C  | 79849 | PDZK2     | L  |
| 2992 | GYG     | 2997  | GYS1      | R  |
| 2992 | GYG     | 8908  | GYG2      | L  |
| 2992 | GYG     | 9883  | POM121    | R  |
| 2992 | GYG     | 81786 | TRIM7     | L  |
| 2994 | GYPB    | 6005  | RHAG      | L  |
| 2995 | GYPE    | 4354  | MPP1      | L  |
| 2997 | GYS1    | 8550  | MAPKAPK5  | L  |
| 2997 | GYS1    | 8908  | GYG2      | RL |
| 3000 | GUCY2D  | 8787  | RGS9      | L  |
| 3001 | GZMA    | 3148  | HMGB2     | L  |
| 3001 | GZMA    | 4691  | NCL       | L  |
| 3001 | GZMA    | 6418  | SET       | L  |
| 3002 | GZMB    | 3482  | IGF2R     | L  |
| 3002 | GZMB    | 5272  | SERPINB9  | L  |
| 3002 | GZMB    | 5551  | PRF1      | L  |
| 3002 | GZMB    | 5552  | PRG1      | L  |
| 3002 | GZMB    | 5873  | RAB27A    | L  |
| 3005 | H1F0    | 3837  | KPNB1     | L  |
| 3005 | H1F0    | 3838  | KPNA2     | L  |
| 3005 | H1F0    | 3843  | RANBP5    | L  |
| 3005 | H1F0    | 5890  | RAD51L1   | L  |
| 3005 | H1F0    | 10527 | IPO7      | L  |
| 3005 | H1F0    | 84273 | C4orf14   | S  |
| 3014 | H2AFX   | 4683  | NBN       | L  |
| 3014 | H2AFX   | 7158  | TP53BP1   | L  |
| 3014 | H2AFX   | 20924 | (null)    | S  |
| 3014 | H2AFX   | 79796 | ALG9      | L  |
| 3015 | H2AFZ   | 3017  | HIST1H2BD | L  |
| 3015 | H2AFZ   | 3619  | INCENP    | L  |
| 3015 | H2AFZ   | 6261  | RYR1      | L  |
| 3015 | H2AFZ   | 8350  | HIST1H3A  | L  |
| 3015 | H2AFZ   | 8359  | HIST1H4A  | L  |
| 3020 | H3F3A   | 7089  | TLE2      | L  |

|      |          |       |          |   |
|------|----------|-------|----------|---|
| 3021 | H3F3B    | 7290  | HIRA     | L |
| 3021 | H3F3B    | 10919 | EHMT2    | R |
| 3024 | HIST1H1A | 4678  | NASP     | L |
| 3032 | HADHB    | 7414  | VCL      | L |
| 3035 | HARS     | 6125  | RPL5     | L |
| 3035 | HARS     | 6897  | TARS     | L |
| 3039 | HBA1     | 3043  | HBB      | S |
| 3039 | HBA1     | 4673  | NAP1L1   | S |
| 3039 | HBA1     | 5728  | PTEN     | S |
| 3040 | HBA2     | 3043  | HBB      | L |
| 3040 | HBA2     | 3048  | HBG2     | L |
| 3043 | HBB      | 3050  | HBZ      | L |
| 3043 | HBB      | 3240  | HP       | L |
| 3043 | HBB      | 51714 | SELT     | S |
| 3048 | HBG2     | 4090  | SMAD5    | L |
| 3054 | HCFC1    | 5134  | PDCD2    | L |
| 3054 | HCFC1    | 5451  | POU2F1   | L |
| 3054 | HCFC1    | 6667  | SP1      | L |
| 3054 | HCFC1    | 7709  | ZBTB17   | L |
| 3054 | HCFC1    | 10488 | CREB3    | L |
| 3054 | HCFC1    | 10891 | PPARGC1A | L |
| 3054 | HCFC1    | 11168 | PSIP1    | L |
| 3054 | HCFC1    | 58487 | ZF       | L |
| 3055 | HCK      | 3572  | IL6ST    | L |
| 3055 | HCK      | 5175  | PECAM1   | L |
| 3055 | HCK      | 5329  | PLAUR    | L |
| 3055 | HCK      | 5335  | PLCG1    | L |
| 3055 | HCK      | 5921  | RASA1    | L |
| 3055 | HCK      | 7456  | WASPIP   | L |
| 3055 | HCK      | 8751  | ADAM15   | L |
| 3055 | HCK      | 8935  | SCAP2    | L |
| 3055 | HCK      | 9094  | UNC119   | L |
| 3055 | HCK      | 9564  | BCAR1    | L |
| 3055 | HCK      | 10657 | KHDRBS1  | L |
| 3055 | HCK      | 22821 | RASA3    | L |
| 3055 | HCK      | 55750 | MULK     | S |
| 3055 | HCK      | 59341 | TRPV4    | L |
| 3059 | HCLS1    | 4067  | LYN      | L |
| 3059 | HCLS1    | 10097 | ACTR2    | L |
| 3059 | HCLS1    | 11184 | MAP4K1   | L |
| 3059 | HCLS1    | 63898 | SH2D4A   | R |
| 3060 | HCRT     | 3061  | HCRTR1   | L |
| 3060 | HCRT     | 3062  | HCRTR2   | L |
| 3062 | HCRTR2   | 4345  | CD200    | L |
| 3064 | HD       | 3092  | HIP1     | L |
| 3064 | HD       | 3093  | HIP2     | L |
| 3064 | HD       | 4102  | MAGEA3   | L |
| 3064 | HD       | 4294  | MAP3K10  | L |
| 3064 | HD       | 5164  | PDK2     | S |
| 3064 | HD       | 5921  | RASA1    | L |
| 3064 | HD       | 6457  | SH3GL3   | L |
| 3064 | HD       | 6667  | SP1      | L |
| 3064 | HD       | 6874  | TAF4     | L |
| 3064 | HD       | 6908  | TBP      | L |
| 3064 | HD       | 7052  | TGM2     | L |
| 3064 | HD       | 7157  | TP53     | L |
| 3064 | HD       | 7166  | TPH1     | L |
| 3064 | HD       | 7341  | SUMO1    | L |
| 3064 | HD       | 8189  | SYMPK    | L |
| 3064 | HD       | 8263  | F8A1     | L |
| 3064 | HD       | 8819  | SAP30    | L |
| 3064 | HD       | 9001  | HAP1     | L |
| 3064 | HD       | 9026  | HIP1R    | L |
| 3064 | HD       | 9322  | TRIP10   | L |
| 3064 | HD       | 9611  | NCOR1    | L |
| 3064 | HD       | 10133 | OPTN     | L |
| 3064 | HD       | 10915 | TCERG1   | L |

|      |       |       |         |   |
|------|-------|-------|---------|---|
| 3064 | HD    | 11153 | HYPE    | L |
| 3064 | HD    | 23390 | ZDHC17  | L |
| 3064 | HD    | 25763 | CXorf27 | L |
| 3064 | HD    | 25764 | HYPK    | L |
| 3064 | HD    | 25766 | HYPK    | L |
| 3064 | HD    | 25942 | SIN3A   | L |
| 3064 | HD    | 29072 | HYPB    | L |
| 3064 | HD    | 29993 | PACSIN1 | L |
| 3064 | HD    | 55081 | ESRRBL1 | L |
| 3064 | HD    | 55660 | FBNBP3  | L |
| 3065 | HDAC1 | 3364  | HUS1    | L |
| 3065 | HDAC1 | 4084  | MXD1    | L |
| 3065 | HDAC1 | 4087  | SMAD2   | L |
| 3065 | HDAC1 | 4193  | MDM2    | L |
| 3065 | HDAC1 | 4197  | MDS1    | L |
| 3065 | HDAC1 | 4654  | MYOD1   | L |
| 3065 | HDAC1 | 4763  | NF1     | L |
| 3065 | HDAC1 | 4790  | NFKB1   | L |
| 3065 | HDAC1 | 5111  | PCNA    | L |
| 3065 | HDAC1 | 5195  | PEX14   | L |
| 3065 | HDAC1 | 5245  | PHB     | L |
| 3065 | HDAC1 | 5371  | PML     | L |
| 3065 | HDAC1 | 5467  | PPARD   | L |
| 3065 | HDAC1 | 5757  | PTMA    | L |
| 3065 | HDAC1 | 5883  | RAD9A   | L |
| 3065 | HDAC1 | 5925  | RB1     | L |
| 3065 | HDAC1 | 5926  | ARID4A  | L |
| 3065 | HDAC1 | 5928  | RBBP4   | L |
| 3065 | HDAC1 | 5933  | RBL1    | L |
| 3065 | HDAC1 | 5970  | RELA    | L |
| 3065 | HDAC1 | 5981  | RFC1    | L |
| 3065 | HDAC1 | 5984  | RFC4    | L |
| 3065 | HDAC1 | 6299  | SALL1   | L |
| 3065 | HDAC1 | 6304  | SATB1   | L |
| 3065 | HDAC1 | 6667  | SP1     | L |
| 3065 | HDAC1 | 6670  | SP3     | L |
| 3065 | HDAC1 | 6886  | TAL1    | L |
| 3065 | HDAC1 | 7026  | NR2F2   | L |
| 3065 | HDAC1 | 7153  | TOP2A   | L |
| 3065 | HDAC1 | 7155  | TOP2B   | L |
| 3065 | HDAC1 | 7164  | TPD52L1 | S |
| 3065 | HDAC1 | 7704  | ZBTB16  | L |
| 3065 | HDAC1 | 8204  | NRIP1   | L |
| 3065 | HDAC1 | 8462  | KLF11   | L |
| 3065 | HDAC1 | 8726  | EED     | L |
| 3065 | HDAC1 | 8841  | HDAC3   | L |
| 3065 | HDAC1 | 9112  | MTA1    | L |
| 3065 | HDAC1 | 9425  | CDYL    | L |
| 3065 | HDAC1 | 9643  | MORF4L2 | L |
| 3065 | HDAC1 | 9734  | HDAC9   | L |
| 3065 | HDAC1 | 9869  | SETDB1  | L |
| 3065 | HDAC1 | 10284 | SAP18   | L |
| 3065 | HDAC1 | 10320 | ZNFN1A1 | L |
| 3065 | HDAC1 | 10401 | PIAS3   | L |
| 3065 | HDAC1 | 10521 | DDX17   | L |
| 3065 | HDAC1 | 10524 | HTATIP  | L |
| 3065 | HDAC1 | 10628 | TXNIP   | L |
| 3065 | HDAC1 | 11176 | BAZ2A   | L |
| 3065 | HDAC1 | 23013 | SPEN    | L |
| 3065 | HDAC1 | 23028 | AOF2    | L |
| 3065 | HDAC1 | 23493 | HEY2    | L |
| 3065 | HDAC1 | 23523 | CABIN1  | L |
| 3065 | HDAC1 | 25942 | SIN3A   | L |
| 3065 | HDAC1 | 29947 | DNMT3L  | L |
| 3065 | HDAC1 | 51317 | PHF21A  | L |
| 3065 | HDAC1 | 54880 | BCOR    | L |
| 3065 | HDAC1 | 55662 | HIF1AN  | L |

|      |       |       |           |   |
|------|-------|-------|-----------|---|
| 3065 | HDAC1 | 55806 | HR        | L |
| 3065 | HDAC1 | 57708 | MIER1     | L |
| 3065 | HDAC1 | 60436 | TGIF2     | L |
| 3066 | HDAC2 | 3475  | IFRD1     | L |
| 3066 | HDAC2 | 4084  | MXD1      | L |
| 3066 | HDAC2 | 5036  | PA2G4     | L |
| 3066 | HDAC2 | 5371  | PML       | L |
| 3066 | HDAC2 | 5467  | PPARD     | L |
| 3066 | HDAC2 | 5511  | PPP1R8    | L |
| 3066 | HDAC2 | 5757  | PTMA      | L |
| 3066 | HDAC2 | 5926  | ARID4A    | L |
| 3066 | HDAC2 | 5970  | RELA      | L |
| 3066 | HDAC2 | 6299  | SALL1     | L |
| 3066 | HDAC2 | 6667  | SP1       | L |
| 3066 | HDAC2 | 6670  | SP3       | L |
| 3066 | HDAC2 | 6839  | SUV39H1   | L |
| 3066 | HDAC2 | 7067  | THRA      | L |
| 3066 | HDAC2 | 7068  | THRB      | L |
| 3066 | HDAC2 | 7153  | TOP2A     | L |
| 3066 | HDAC2 | 7528  | YY1       | L |
| 3066 | HDAC2 | 8726  | EED       | L |
| 3066 | HDAC2 | 9112  | MTA1      | L |
| 3066 | HDAC2 | 9425  | CDYL      | L |
| 3066 | HDAC2 | 9541  | CIR       | L |
| 3066 | HDAC2 | 9869  | SETDB1    | L |
| 3066 | HDAC2 | 10320 | ZNFN1A1   | L |
| 3066 | HDAC2 | 22938 | SNW1      | L |
| 3066 | HDAC2 | 23013 | SPEN      | L |
| 3066 | HDAC2 | 23523 | CABIN1    | L |
| 3066 | HDAC2 | 25942 | SIN3A     | L |
| 3066 | HDAC2 | 55662 | HIF1AN    | L |
| 3066 | HDAC2 | 55929 | DMAP1     | L |
| 3066 | HDAC2 | 64375 | ZNFN1A4   | L |
| 3066 | HDAC2 | 83933 | HDAC10    | L |
| 3066 | HDAC2 | 84168 | ANTXR1    | L |
| 3066 | HDAC2 | 84525 | HOP       | L |
| 3069 | HDLBP | 4089  | SMAD4     | L |
| 3069 | HDLBP | 11260 | XPOT      | L |
| 3069 | HDLBP | 55603 | FAM46A    | L |
| 3073 | HEXA  | 23326 | USP22     | S |
| 3075 | CFH   | 3078  | CFHL1     | L |
| 3075 | CFH   | 3426  | IF        | L |
| 3075 | CFH   | 3684  | ITGAM     | L |
| 3075 | CFH   | 6402  | SELL      | L |
| 3077 | HFE   | 7036  | TFR2      | L |
| 3077 | HFE   | 7037  | TFRC      | L |
| 3078 | CFHL1 | 3929  | LBP       | L |
| 3082 | HGF   | 3083  | HGFAC     | L |
| 3082 | HGF   | 4233  | MET       | L |
| 3082 | HGF   | 6382  | SDC1      | L |
| 3082 | HGF   | 6383  | SDC2      | L |
| 3082 | HGF   | 7123  | CLEC3B    | L |
| 3083 | HGFAC | 6692  | SPINT1    | L |
| 3083 | HGFAC | 10653 | SPINT2    | L |
| 3084 | NRG1  | 3984  | LIMK1     | L |
| 3087 | HHEX  | 5371  | PML       | L |
| 3087 | HHEX  | 30008 | EFEMP2    | R |
| 3087 | HHEX  | 83755 | KRTAP4-12 | R |
| 3091 | HIF1A | 3320  | HSPCA     | L |
| 3091 | HIF1A | 3725  | JUN       | L |
| 3091 | HIF1A | 4193  | MDM2      | L |
| 3091 | HIF1A | 5187  | PER1      | L |
| 3091 | HIF1A | 5230  | PGK1      | L |
| 3091 | HIF1A | 5595  | MAPK3     | L |
| 3091 | HIF1A | 5688  | PSMA7     | L |
| 3091 | HIF1A | 5702  | PSMC3     | L |
| 3091 | HIF1A | 6759  | SSX4      | R |

|      |          |        |          |   |
|------|----------|--------|----------|---|
| 3091 | HIF1A    | 7157   | TP53     | L |
| 3091 | HIF1A    | 7428   | VHL      | L |
| 3091 | HIF1A    | 7818   | DAP3     | L |
| 3091 | HIF1A    | 8533   | COPS3    | L |
| 3091 | HIF1A    | 8648   | NCOA1    | L |
| 3091 | HIF1A    | 55662  | HIF1AN   | L |
| 3092 | HIP1     | 3692   | ITGB4BP  | S |
| 3092 | HIP1     | 5201   | PFDN1    | S |
| 3092 | HIP1     | 6204   | RPS10    | S |
| 3092 | HIP1     | 9026   | HIP1R    | L |
| 3092 | HIP1     | 55081  | ESRRBL1  | L |
| 3093 | HIP2     | 4738   | NEDD8    | L |
| 3093 | HIP2     | 4790   | NFKB1    | L |
| 3093 | HIP2     | 7157   | TP53     | L |
| 3093 | HIP2     | 10612  | TRIM3    | L |
| 3096 | HIVEP1   | 4088   | SMAD3    | L |
| 3096 | HIVEP1   | 5861   | RAB1A    | S |
| 3096 | HIVEP1   | 7414   | VCL      | L |
| 3096 | HIVEP1   | 10436  | C2F      | S |
| 3098 | HK1      | 7416   | VDAC1    | L |
| 3098 | HK1      | 22955  | SCMH1    | S |
| 3099 | HK2      | 29979  | UBQLN1   | R |
| 3101 | HK3      | 3487   | IGFBP4   | L |
| 3101 | HK3      | 3952   | LEP      | L |
| 3101 | HK3      | 7709   | ZBTB17   | L |
| 3101 | HK3      | 27306  | PGDS     | L |
| 3104 | HKR3     | 127557 | ZBTB8    | R |
| 3104 | HKR3     | 135927 | C7orf34  | R |
| 3105 | HLA-A    | 3812   | KIR3DL2  | L |
| 3105 | HLA-A    | 4103   | MAGEA4   | L |
| 3105 | HLA-A    | 6955   | TRA@     | L |
| 3105 | HLA-A    | 10859  | LILRB1   | L |
| 3106 | HLA-B    | 3811   | KIR3DL1  | L |
| 3106 | HLA-B    | 3824   | KLRD1    | L |
| 3106 | HLA-B    | 4100   | MAGEA1   | L |
| 3106 | HLA-B    | 6955   | TRA@     | L |
| 3106 | HLA-B    | 10859  | LILRB1   | L |
| 3107 | HLA-C    | 3309   | HSPA5    | L |
| 3107 | HLA-C    | 3803   | KIR2DL2  | L |
| 3107 | HLA-C    | 3804   | KIR2DL3  | L |
| 3107 | HLA-C    | 3806   | KIR2DS1  | L |
| 3107 | HLA-C    | 6891   | TAP2     | L |
| 3107 | HLA-C    | 6892   | TAPBP    | L |
| 3107 | HLA-C    | 10859  | LILRB1   | L |
| 3108 | HLA-DMA  | 3109   | HLA-DMB  | L |
| 3108 | HLA-DMA  | 3111   | HLA-DOA  | L |
| 3108 | HLA-DMA  | 3122   | HLA-DRA  | L |
| 3108 | HLA-DMA  | 3123   | HLA-DRB1 | L |
| 3108 | HLA-DMA  | 3732   | CD82     | L |
| 3109 | HLA-DMB  | 3112   | HLA-DOB  | L |
| 3109 | HLA-DMB  | 3122   | HLA-DRA  | L |
| 3109 | HLA-DMB  | 3732   | CD82     | L |
| 3113 | HLA-DPA1 | 3115   | HLA-DPB1 | L |
| 3117 | HLA-DQA1 | 6456   | SH3GL2   | S |
| 3117 | HLA-DQA1 | 7088   | TLE1     | S |
| 3117 | HLA-DQA1 | 9094   | UNC119   | S |
| 3117 | HLA-DQA1 | 55791  | C1orf103 | S |
| 3118 | HLA-DQA2 | 3119   | HLA-DQB1 | L |
| 3118 | HLA-DQA2 | 3630   | INS      | L |
| 3119 | HLA-DQB1 | 3630   | INS      | L |
| 3122 | HLA-DRA  | 3123   | HLA-DRB1 | L |
| 3122 | HLA-DRA  | 3125   | HLA-DRB3 | L |
| 3122 | HLA-DRA  | 3127   | HLA-DRB5 | L |
| 3122 | HLA-DRA  | 3732   | CD82     | L |
| 3122 | HLA-DRA  | 4155   | MBP      | L |
| 3122 | HLA-DRA  | 25766  | HYPIC    | L |
| 3123 | HLA-DRB1 | 6955   | TRA@     | L |



|      |          |        |          |   |
|------|----------|--------|----------|---|
| 3125 | HLA-DRB3 | 5443   | POMC     | L |
| 3125 | HLA-DRB3 | 375078 | (null)   | S |
| 3131 | HLF      | 3725   | JUN      | L |
| 3131 | HLF      | 3727   | JUND     | L |
| 3131 | HLF      | 7008   | TEF      | L |
| 3131 | HLF      | 10538  | BATF     | L |
| 3131 | HLF      | 55509  | SNFT     | L |
| 3133 | HLA-E    | 3821   | KLRC1    | L |
| 3133 | HLA-E    | 3822   | KLRC2    | L |
| 3133 | HLA-E    | 3824   | KLRD1    | L |
| 3134 | HLA-F    | 6890   | TAP1     | L |
| 3134 | HLA-F    | 10859  | LILRB1   | L |
| 3135 | HLA-G    | 3824   | KLRD1    | L |
| 3135 | HLA-G    | 6890   | TAP1     | L |
| 3135 | HLA-G    | 6891   | TAP2     | L |
| 3135 | HLA-G    | 10859  | LILRB1   | L |
| 3146 | HMGB1    | 3190   | HNRPK    | L |
| 3146 | HMGB1    | 3235   | HOXD9    | L |
| 3146 | HMGB1    | 4790   | NFKB1    | L |
| 3146 | HMGB1    | 5327   | PLAT     | L |
| 3146 | HMGB1    | 5340   | PLG      | L |
| 3146 | HMGB1    | 5460   | POU5F1   | L |
| 3146 | HMGB1    | 5591   | PRKDC    | L |
| 3146 | HMGB1    | 5896   | RAG1     | L |
| 3146 | HMGB1    | 5925   | RB1      | L |
| 3146 | HMGB1    | 5970   | RELA     | L |
| 3146 | HMGB1    | 6872   | TAF1     | L |
| 3146 | HMGB1    | 6908   | TBP      | L |
| 3146 | HMGB1    | 7088   | TLE1     | L |
| 3146 | HMGB1    | 7157   | TP53     | L |
| 3146 | HMGB1    | 7161   | TP73     | L |
| 3146 | HMGB1    | 9094   | UNC119   | S |
| 3146 | HMGB1    | 11161  | C14orf1  | S |
| 3146 | HMGB1    | 55791  | C1orf103 | S |
| 3148 | HMGB2    | 5241   | PGR      | L |
| 3148 | HMGB2    | 5451   | POU2F1   | L |
| 3148 | HMGB2    | 5452   | POU2F2   | L |
| 3148 | HMGB2    | 5453   | POU3F1   | L |
| 3148 | HMGB2    | 5460   | POU5F1   | L |
| 3148 | HMGB2    | 5591   | PRKDC    | L |
| 3148 | HMGB2    | 5896   | RAG1     | L |
| 3148 | HMGB2    | 6418   | SET      | L |
| 3148 | HMGB2    | 7157   | TP53     | L |
| 3150 | HMG1     | 3151   | HMG2     | L |
| 3150 | HMG1     | 7534   | YWHAZ    | L |
| 3155 | HMGCL    | 58475  | MS4A7    | S |
| 3156 | HMGCR    | 3638   | INSIG1   | L |
| 3156 | HMGCR    | 90627  | STARD13  | L |
| 3159 | HMGA1    | 3659   | IRF1     | L |
| 3159 | HMGA1    | 3725   | JUN      | L |
| 3159 | HMGA1    | 4800   | NFYA     | L |
| 3159 | HMGA1    | 5453   | POU3F1   | L |
| 3159 | HMGA1    | 6047   | RNF4     | L |
| 3159 | HMGA1    | 6667   | SP1      | L |
| 3159 | HMGA1    | 28996  | HIPK2    | L |
| 3159 | HMGA1    | 51684  | SUFU     | L |
| 3162 | HMOX1    | 4842   | NOS1     | L |
| 3163 | HMOX2    | 9001   | HAP1     | S |
| 3163 | HMOX2    | 9737   | GPRASP1  | S |
| 3163 | HMOX2    | 9869   | SETDB1   | S |
| 3163 | HMOX2    | 10980  | COPS6    | S |
| 3163 | HMOX2    | 28964  | GIT1     | S |
| 3163 | HMOX2    | 55791  | C1orf103 | S |
| 3163 | HMOX2    | 57562  | KIAA1377 | S |
| 3164 | NR4A1    | 5349   | FXYD3    | S |
| 3164 | NR4A1    | 5371   | PML      | L |
| 3164 | NR4A1    | 5469   | PPARBP   | L |

|      |          |        |           |   |
|------|----------|--------|-----------|---|
| 3164 | NR4A1    | 6258   | RXRG      | L |
| 3164 | NR4A1    | 8202   | NCOA3     | L |
| 3164 | NR4A1    | 8648   | NCOA1     | L |
| 3164 | NR4A1    | 8850   | PCAF      | L |
| 3164 | NR4A1    | 9612   | NCOR2     | L |
| 3164 | NR4A1    | 27330  | RPS6KA6   | S |
| 3164 | NR4A1    | 55160  | ARHGEF10L | S |
| 3169 | FOXA1    | 8290   | HIST3H3   | L |
| 3170 | FOXA2    | 3175   | ONECUT1   | L |
| 3170 | FOXA2    | 3202   | HOXA5     | L |
| 3170 | FOXA2    | 4284   | MIP       | L |
| 3170 | FOXA2    | 5015   | OTX2      | L |
| 3170 | FOXA2    | 7088   | TLE1      | L |
| 3170 | FOXA2    | 8648   | NCOA1     | L |
| 3172 | HNF4A    | 4087   | SMAD2     | L |
| 3172 | HNF4A    | 5469   | PPARBP    | L |
| 3172 | HNF4A    | 6927   | TCF1      | L |
| 3172 | HNF4A    | 7025   | NR2F1     | L |
| 3172 | HNF4A    | 7157   | TP53      | L |
| 3172 | HNF4A    | 7182   | NR2C2     | L |
| 3172 | HNF4A    | 8648   | NCOA1     | L |
| 3172 | HNF4A    | 8805   | TRIM24    | L |
| 3172 | HNF4A    | 9282   | CRSP2     | L |
| 3172 | HNF4A    | 9326   | ZNHIT3    | L |
| 3172 | HNF4A    | 10499  | NCOA2     | L |
| 3172 | HNF4A    | 10923  | SUB1      | L |
| 3172 | HNF4A    | 29982  | NRBF2     | L |
| 3172 | HNF4A    | 133522 | PPARGC1B  | L |
| 3175 | ONECUT1  | 8850   | PCAF      | L |
| 3178 | HNRPA1   | 6144   | RPL21     | S |
| 3178 | HNRPA1   | 7916   | BAT2      | L |
| 3178 | HNRPA1   | 7920   | BAT5      | L |
| 3178 | HNRPA1   | 8458   | TTF2      | L |
| 3178 | HNRPA1   | 9796   | PHYHIP    | S |
| 3178 | HNRPA1   | 54464  | XRN1      | L |
| 3178 | HNRPA1   | 65110  | UPF3A     | L |
| 3181 | HNRPA2B1 | 3191   | HNRPL     | L |
| 3181 | HNRPA2B1 | 6625   | SNRP70    | L |
| 3181 | HNRPA2B1 | 7428   | VHL       | L |
| 3181 | HNRPA2B1 | 8458   | TTF2      | L |
| 3182 | HNRPA1   | 4792   | NFKBIA    | L |
| 3182 | HNRPA1   | 8626   | TP73L     | L |
| 3183 | HNRPC    | 3839   | KPNA3     | R |
| 3183 | HNRPC    | 3845   | KRAS      | R |
| 3183 | HNRPC    | 5155   | PDGFB     | L |
| 3183 | HNRPC    | 5257   | PHKB      | R |
| 3183 | HNRPC    | 5300   | PIN1      | R |
| 3183 | HNRPC    | 7329   | UBE2I     | R |
| 3183 | HNRPC    | 8907   | AP1M1     | R |
| 3183 | HNRPC    | 9513   | FXR2      | R |
| 3183 | HNRPC    | 11007  | DIPA      | R |
| 3183 | HNRPC    | 51545  | ZNF581    | R |
| 3183 | HNRPC    | 55285  | FLJ11016  | R |
| 3183 | HNRPC    | 55885  | LMO3      | R |
| 3183 | HNRPC    | 138046 | LOC138046 | R |
| 3184 | HNRPD    | 3939   | LDHA      | L |
| 3184 | HNRPD    | 6294   | SAFB      | L |
| 3184 | HNRPD    | 23658  | LSM5      | L |
| 3184 | HNRPD    | 54512  | EXOSC4    | L |
| 3185 | HNRPF    | 4686   | NCBP1     | L |
| 3185 | HNRPF    | 5430   | POLR2A    | L |
| 3185 | HNRPF    | 8570   | KHSRP     | L |
| 3185 | HNRPF    | 22916  | NCBP2     | L |
| 3187 | HNRPH1   | 4686   | NCBP1     | L |
| 3187 | HNRPH1   | 7094   | TLN1      | L |
| 3187 | HNRPH1   | 7414   | VCL       | L |
| 3187 | HNRPH1   | 8570   | KHSRP     | L |

|      |        |        |           |    |
|------|--------|--------|-----------|----|
| 3187 | HNRPH1 | 10040  | TOM1L1    | S  |
| 3187 | HNRPH1 | 10915  | TCERG1    | L  |
| 3187 | HNRPH1 | 22916  | NCBP2     | L  |
| 3189 | HNRPH3 | 6191   | RPS4X     | S  |
| 3189 | HNRPH3 | 6357   | CCL13     | S  |
| 3189 | HNRPH3 | 7094   | TLN1      | L  |
| 3189 | HNRPH3 | 7276   | TTR       | S  |
| 3189 | HNRPH3 | 7414   | VCL       | L  |
| 3189 | HNRPH3 | 10524  | HTATIP    | S  |
| 3189 | HNRPH3 | 10813  | UTP14A    | S  |
| 3189 | HNRPH3 | 11040  | PIM2      | S  |
| 3189 | HNRPH3 | 11161  | C14orf1   | S  |
| 3190 | HNRPK  | 3191   | HNRPL     | L  |
| 3190 | HNRPK  | 3276   | HRMT1L2   | L  |
| 3190 | HNRPK  | 3702   | ITK       | L  |
| 3190 | HNRPK  | 4904   | YBX1      | L  |
| 3190 | HNRPK  | 5094   | PCBP2     | L  |
| 3190 | HNRPK  | 5295   | PIK3R1    | L  |
| 3190 | HNRPK  | 6294   | SAFB      | L  |
| 3190 | HNRPK  | 6428   | SFRS3     | L  |
| 3190 | HNRPK  | 6714   | SRC       | L  |
| 3190 | HNRPK  | 7094   | TLN1      | L  |
| 3190 | HNRPK  | 7329   | UBE2I     | R  |
| 3190 | HNRPK  | 7409   | VAV1      | L  |
| 3190 | HNRPK  | 7414   | VCL       | L  |
| 3190 | HNRPK  | 8440   | NCK2      | RL |
| 3190 | HNRPK  | 9402   | GRAP2     | R  |
| 3190 | HNRPK  | 9444   | QKI       | R  |
| 3190 | HNRPK  | 9782   | MATR3     | R  |
| 3190 | HNRPK  | 10174  | SORBS3    | R  |
| 3190 | HNRPK  | 10179  | RBM7      | R  |
| 3190 | HNRPK  | 10656  | KHDRBS3   | R  |
| 3190 | HNRPK  | 10657  | KHDRBS1   | L  |
| 3190 | HNRPK  | 26505  | CNNM3     | R  |
| 3190 | HNRPK  | 27316  | RBMX      | R  |
| 3190 | HNRPK  | 55285  | FLJ11016  | R  |
| 3190 | HNRPK  | 56654  | NPDC1     | R  |
| 3190 | HNRPK  | 79171  | MGC10433  | R  |
| 3190 | HNRPK  | 85362  | (null)    | R  |
| 3190 | HNRPK  | 202559 | KHDRBS2   | R  |
| 3191 | HNRPL  | 5094   | PCBP2     | L  |
| 3191 | HNRPL  | 5725   | PTBP1     | L  |
| 3191 | HNRPL  | 10362  | HMG20B    | S  |
| 3191 | HNRPL  | 64219  | PJA1      | S  |
| 3192 | HNRPU  | 3276   | HRMT1L2   | L  |
| 3192 | HNRPU  | 4692   | NDN       | L  |
| 3192 | HNRPU  | 5456   | POU3F4    | L  |
| 3192 | HNRPU  | 6606   | SMN1      | L  |
| 3192 | HNRPU  | 6850   | SYK       | L  |
| 3192 | HNRPU  | 8178   | ELL       | L  |
| 3195 | TLX1   | 5540   | PPYR1     | L  |
| 3196 | TLX2   | 7533   | YWHAH     | L  |
| 3198 | HOXA1  | 4188   | MDFI      | R  |
| 3198 | HOXA1  | 5316   | PKNOX1    | L  |
| 3198 | HOXA1  | 5359   | PLSCR1    | R  |
| 3198 | HOXA1  | 7205   | TRIP6     | R  |
| 3198 | HOXA1  | 9404   | LPXN      | R  |
| 3198 | HOXA1  | 26511  | CHIC2     | R  |
| 3198 | HOXA1  | 30008  | EFEMP2    | R  |
| 3198 | HOXA1  | 79090  | TRAPPC6A  | R  |
| 3198 | HOXA1  | 83755  | KRTAP4-12 | R  |
| 3202 | HOXA5  | 5087   | PBX1      | L  |
| 3204 | HOXA7  | 4211   | MEIS1     | L  |
| 3205 | HOXA9  | 4087   | SMAD2     | L  |
| 3205 | HOXA9  | 4089   | SMAD4     | L  |
| 3205 | HOXA9  | 5089   | PBX2      | L  |
| 3205 | HOXA9  | 5359   | PLSCR1    | R  |

|      |        |        |           |   |
|------|--------|--------|-----------|---|
| 3205 | HOXA9  | 7205   | TRIP6     | R |
| 3205 | HOXA9  | 11030  | RBPMS     | R |
| 3206 | HOXA10 | 4211   | MEIS1     | L |
| 3206 | HOXA10 | 5087   | PBX1      | L |
| 3206 | HOXA10 | 5777   | PTPN6     | L |
| 3208 | HPCA   | 4671   | BIRC1     | L |
| 3211 | HOXB1  | 4211   | MEIS1     | L |
| 3211 | HOXB1  | 5080   | PAX6      | L |
| 3211 | HOXB1  | 5087   | PBX1      | L |
| 3211 | HOXB1  | 5316   | PKNOX1    | L |
| 3216 | HOXB6  | 3217   | HOXB7     | L |
| 3216 | HOXB6  | 3866   | KRT15     | R |
| 3216 | HOXB6  | 5316   | PKNOX1    | L |
| 3216 | HOXB6  | 5359   | PLSCR1    | R |
| 3216 | HOXB6  | 6303   | SAT       | R |
| 3217 | HOXB7  | 4792   | NFKBIA    | L |
| 3217 | HOXB7  | 5316   | PKNOX1    | L |
| 3218 | HOXB8  | 4212   | MEIS2     | L |
| 3218 | HOXB8  | 5087   | PBX1      | L |
| 3218 | HOXB8  | 5089   | PBX2      | L |
| 3219 | HOXB9  | 4188   | MDFI      | R |
| 3219 | HOXB9  | 6303   | SAT       | R |
| 3219 | HOXB9  | 7832   | BTG2      | L |
| 3219 | HOXB9  | 11030  | RBPMS     | R |
| 3219 | HOXB9  | 83755  | KRTAP4-12 | R |
| 3221 | HOXC4  | 5451   | POU2F1    | L |
| 3221 | HOXC4  | 5591   | PRKDC     | L |
| 3224 | HOXC8  | 4086   | SMAD1     | L |
| 3224 | HOXC8  | 4089   | SMAD4     | L |
| 3224 | HOXC8  | 4091   | SMAD6     | L |
| 3224 | HOXC8  | 7832   | BTG2      | L |
| 3233 | HOXD4  | 4211   | MEIS1     | L |
| 3233 | HOXD4  | 5087   | PBX1      | L |
| 3233 | HOXD4  | 204851 | HIPK1     | L |
| 3235 | HOXD9  | 5316   | PKNOX1    | L |
| 3236 | HOXD10 | 5087   | PBX1      | L |
| 3237 | HOXD11 | 4211   | MEIS1     | L |
| 3238 | HOXD12 | 4097   | MAFG      | L |
| 3238 | HOXD12 | 4211   | MEIS1     | L |
| 3238 | HOXD12 | 23764  | MAFF      | L |
| 3240 | HP     | 3684   | ITGAM     | L |
| 3240 | HP     | 3689   | ITGB2     | L |
| 3240 | HP     | 9332   | CD163     | L |
| 3241 | HPCAL1 | 10363  | HMG20A    | R |
| 3241 | HPCAL1 | 113878 | DTX2      | R |
| 3251 | HPRT1  | 55093  | C8orf32   | R |
| 3251 | HPRT1  | 56952  | PRTFDC1   | R |
| 3265 | HRAS   | 3643   | INSR      | L |
| 3265 | HRAS   | 3654   | IRAK1     | L |
| 3265 | HRAS   | 3656   | IRAK2     | L |
| 3265 | HRAS   | 3956   | LGALS1    | L |
| 3265 | HRAS   | 4301   | MLLT4     | L |
| 3265 | HRAS   | 4763   | NF1       | L |
| 3265 | HRAS   | 5147   | PDE6D     | L |
| 3265 | HRAS   | 5155   | PDGFB     | L |
| 3265 | HRAS   | 5290   | PIK3CA    | L |
| 3265 | HRAS   | 5294   | PIK3CG    | L |
| 3265 | HRAS   | 5295   | PIK3R1    | L |
| 3265 | HRAS   | 5599   | MAPK8     | L |
| 3265 | HRAS   | 5604   | MAP2K1    | L |
| 3265 | HRAS   | 5894   | RAF1      | L |
| 3265 | HRAS   | 5900   | RALGDS    | L |
| 3265 | HRAS   | 5910   | RAP1GDS1  | L |
| 3265 | HRAS   | 5921   | RASA1     | L |
| 3265 | HRAS   | 6654   | SOS1      | L |
| 3265 | HRAS   | 6655   | SOS2      | L |
| 3265 | HRAS   | 7074   | TIAM1     | L |

|      |         |        |          |    |
|------|---------|--------|----------|----|
| 3265 | HRAS    | 7409   | VAV1     | L  |
| 3265 | HRAS    | 8036   | SHOC2    | L  |
| 3265 | HRAS    | 8315   | BRAP     | L  |
| 3265 | HRAS    | 8525   | DGKZ     | L  |
| 3265 | HRAS    | 9610   | RIN1     | L  |
| 3265 | HRAS    | 10567  | RABAC1   | L  |
| 3265 | HRAS    | 11186  | RASSF1   | L  |
| 3265 | HRAS    | 22806  | ZNFN1A3  | L  |
| 3265 | HRAS    | 29899  | GPSP2    | L  |
| 3265 | HRAS    | 55914  | ERBB2IP  | L  |
| 3265 | HRAS    | 115727 | RASGRP4  | L  |
| 3265 | HRAS    | 266747 | Rgr      | L  |
| 3266 | ERAS    | 5293   | PIK3CD   | L  |
| 3266 | ERAS    | 5295   | PIK3R1   | L  |
| 3267 | HRB     | 7514   | XPO1     | L  |
| 3267 | HRB     | 58513  | EPS15L1  | L  |
| 3269 | HRH1    | 3569   | IL6      | L  |
| 3270 | HRC     | 10345  | TRDN     | L  |
| 3273 | HRG     | 5340   | PLG      | L  |
| 3273 | HRG     | 7057   | THBS1    | L  |
| 3275 | HRMT1L1 | 7916   | BAT2     | L  |
| 3275 | HRMT1L1 | 11100  | HNRPUL1  | L  |
| 3275 | HRMT1L1 | 63948  | DMRTB1   | R  |
| 3275 | HRMT1L1 | 79869  | FLJ12529 | R  |
| 3276 | HRMT1L2 | 3420   | IDH3B    | S  |
| 3276 | HRMT1L2 | 3454   | IFNAR1   | L  |
| 3276 | HRMT1L2 | 3609   | ILF3     | L  |
| 3276 | HRMT1L2 | 6279   | S100A8   | S  |
| 3276 | HRMT1L2 | 6829   | SUPT5H   | L  |
| 3276 | HRMT1L2 | 7157   | TP53     | L  |
| 3276 | HRMT1L2 | 7832   | BTG2     | L  |
| 3276 | HRMT1L2 | 8202   | NCOA3    | L  |
| 3276 | HRMT1L2 | 8648   | NCOA1    | L  |
| 3276 | HRMT1L2 | 8715   | NOL4     | S  |
| 3276 | HRMT1L2 | 9444   | QKI      | L  |
| 3276 | HRMT1L2 | 10094  | ARPC3    | S  |
| 3276 | HRMT1L2 | 10236  | HNRPR    | SL |
| 3276 | HRMT1L2 | 10499  | NCOA2    | L  |
| 3276 | HRMT1L2 | 10656  | KHDRBS3  | L  |
| 3276 | HRMT1L2 | 10657  | KHDRBS1  | L  |
| 3276 | HRMT1L2 | 22927  | HABP4    | S  |
| 3276 | HRMT1L2 | 51003  | MED31    | S  |
| 3276 | HRMT1L2 | 55339  | WDR33    | S  |
| 3276 | HRMT1L2 | 55791  | C1orf103 | S  |
| 3276 | HRMT1L2 | 56252  | YLPM1    | S  |
| 3276 | HRMT1L2 | 84966  | IGSF21   | S  |
| 3280 | HES1    | 7088   | TLE1     | L  |
| 3280 | HES1    | 23411  | SIRT1    | L  |
| 3280 | HES1    | 23493  | HEY2     | L  |
| 3280 | HES1    | 55502  | HES6     | L  |
| 3281 | HSBP1   | 3297   | HSF1     | L  |
| 3281 | HSBP1   | 51019  | CGI-116  | R  |
| 3297 | HSF1    | 3298   | HSF2     | L  |
| 3297 | HSF1    | 3303   | HSPA1A   | L  |
| 3297 | HSF1    | 3312   | HSPA8    | L  |
| 3297 | HSF1    | 3337   | DNAJB1   | L  |
| 3297 | HSF1    | 5591   | PRKDC    | L  |
| 3297 | HSF1    | 5601   | MAPK9    | L  |
| 3297 | HSF1    | 6597   | SMARCA4  | L  |
| 3297 | HSF1    | 6772   | STAT1    | L  |
| 3297 | HSF1    | 6872   | TAF1     | L  |
| 3297 | HSF1    | 6879   | TAF7     | L  |
| 3297 | HSF1    | 6908   | TBP      | L  |
| 3297 | HSF1    | 7520   | XRCC5    | L  |
| 3297 | HSF1    | 8189   | SYMPK    | L  |
| 3297 | HSF1    | 10923  | SUB1     | L  |
| 3297 | HSF1    | 23054  | NCOA6    | L  |

|      |        |        |          |   |
|------|--------|--------|----------|---|
| 3297 | HSF1   | 85021  | REPS1    | L |
| 3298 | HSF2   | 7329   | UBE2I    | L |
| 3298 | HSF2   | 11077  | HSF2BP   | L |
| 3298 | HSF2   | 23636  | NUP62    | L |
| 3300 | DNAJB2 | 4089   | SMAD4    | L |
| 3301 | DNAJA1 | 3312   | HSPA8    | L |
| 3301 | DNAJA1 | 4071   | TM4SF1   | S |
| 3301 | DNAJA1 | 9232   | PTTG1    | L |
| 3301 | DNAJA1 | 51343  | FZR1     | S |
| 3301 | DNAJA1 | 51497  | TH1L     | S |
| 3301 | DNAJA1 | 57819  | LSM2     | L |
| 3303 | HSPA1A | 3337   | DNAJB1   | L |
| 3303 | HSPA1A | 3855   | KRT7     | L |
| 3303 | HSPA1A | 4217   | MAP3K5   | L |
| 3303 | HSPA1A | 4481   | MSR1     | L |
| 3303 | HSPA1A | 5610   | EIF2AK2  | L |
| 3303 | HSPA1A | 5757   | PTMA     | L |
| 3303 | HSPA1A | 5830   | PEX5     | L |
| 3303 | HSPA1A | 6523   | SLC5A1   | L |
| 3303 | HSPA1A | 6662   | SOX9     | L |
| 3303 | HSPA1A | 6767   | ST13     | L |
| 3303 | HSPA1A | 7157   | TP53     | L |
| 3303 | HSPA1A | 7917   | BAT3     | L |
| 3303 | HSPA1A | 8517   | IKBKG    | L |
| 3303 | HSPA1A | 8805   | TRIM24   | L |
| 3303 | HSPA1A | 9093   | DNAJA3   | L |
| 3303 | HSPA1A | 9131   | PDCD8    | L |
| 3303 | HSPA1A | 9530   | BAG4     | L |
| 3303 | HSPA1A | 9531   | BAG3     | L |
| 3303 | HSPA1A | 9532   | BAG2     | L |
| 3303 | HSPA1A | 10273  | STUB1    | L |
| 3303 | HSPA1A | 10915  | TCERG1   | L |
| 3303 | HSPA1A | 23640  | HSPBP1   | L |
| 3303 | HSPA1A | 23645  | PPP1R15A | L |
| 3303 | HSPA1A | 51726  | DNAJB11  | L |
| 3304 | HSPA1B | 5611   | DNAJC3   | L |
| 3304 | HSPA1B | 192111 | MGC5352  | S |
| 3306 | HSPA2  | 23640  | HSPBP1   | R |
| 3308 | HSPA4  | 4306   | NR3C2    | L |
| 3308 | HSPA4  | 8841   | HDAC3    | L |
| 3308 | HSPA4  | 11098  | PRSS23   | S |
| 3308 | HSPA4  | 79577  | CDC73    | S |
| 3309 | HSPA5  | 3359   | HTR3A    | L |
| 3309 | HSPA5  | 3507   | IGHM     | L |
| 3309 | HSPA5  | 3856   | KRT8     | L |
| 3309 | HSPA5  | 3875   | KRT18    | L |
| 3309 | HSPA5  | 3925   | STMN1    | L |
| 3309 | HSPA5  | 3938   | LCT      | L |
| 3309 | HSPA5  | 3949   | LDLR     | L |
| 3309 | HSPA5  | 5829   | PXN      | L |
| 3309 | HSPA5  | 6955   | TRA@     | L |
| 3309 | HSPA5  | 7253   | TSHR     | L |
| 3309 | HSPA5  | 7450   | VWF      | L |
| 3309 | HSPA5  | 9159   | PCSK7    | L |
| 3309 | HSPA5  | 9451   | EIF2AK3  | L |
| 3309 | HSPA5  | 9564   | BCAR1    | S |
| 3309 | HSPA5  | 10197  | PSME3    | S |
| 3309 | HSPA5  | 10915  | TCERG1   | L |
| 3309 | HSPA5  | 10961  | ERP29    | L |
| 3309 | HSPA5  | 54431  | DNAJC10  | L |
| 3309 | HSPA5  | 54972  | HSPA5BP1 | L |
| 3309 | HSPA5  | 56896  | DPYSL5   | S |
| 3309 | HSPA5  | 57062  | DDX24    | S |
| 3309 | HSPA5  | 64215  | DNAJC1   | L |
| 3309 | HSPA5  | 80021  | TMEM62   | S |
| 3312 | HSPA8  | 3320   | HSPCA    | L |
| 3312 | HSPA8  | 3337   | DNAJB1   | L |

|      |        |        |               |     |
|------|--------|--------|---------------|-----|
| 3312 | HSPA8  | 3717   | JAK2          | L   |
| 3312 | HSPA8  | 3925   | STMN1         | L   |
| 3312 | HSPA8  | 4071   | TM4SF1        | S   |
| 3312 | HSPA8  | 4435   | CITED1        | L   |
| 3312 | HSPA8  | 5829   | PXN           | L   |
| 3312 | HSPA8  | 5966   | REL           | L   |
| 3312 | HSPA8  | 5997   | RGS2          | S   |
| 3312 | HSPA8  | 6667   | SP1           | L   |
| 3312 | HSPA8  | 7132   | TNFRSF1A      | L   |
| 3312 | HSPA8  | 7203   | CCT3          | L   |
| 3312 | HSPA8  | 7316   | UBC           | S   |
| 3312 | HSPA8  | 7414   | VCL           | L   |
| 3312 | HSPA8  | 8841   | HDAC3         | L   |
| 3312 | HSPA8  | 9093   | DNAJA3        | L   |
| 3312 | HSPA8  | 9531   | BAG3          | L   |
| 3312 | HSPA8  | 9532   | BAG2          | L   |
| 3312 | HSPA8  | 10072  | DPP3          | S   |
| 3312 | HSPA8  | 10273  | STUB1         | L   |
| 3312 | HSPA8  | 10474  | TADA3L        | S   |
| 3312 | HSPA8  | 10808  | HSPH1         | L   |
| 3312 | HSPA8  | 10915  | TCERG1        | L   |
| 3312 | HSPA8  | 23640  | HSPBP1        | RSL |
| 3312 | HSPA8  | 54205  | CYCS          | L   |
| 3312 | HSPA8  | 84273  | C4orf14       | S   |
| 3312 | HSPA8  | 286397 | (null)        | S   |
| 3313 | HSPA9B | 4597   | MVD           | L   |
| 3313 | HSPA9B | 7157   | TP53          | L   |
| 3313 | HSPA9B | 7184   | TRA1          | L   |
| 3313 | HSPA9B | 7416   | VDAC1         | L   |
| 3315 | HSPB1  | 5464   | PPA1          | S   |
| 3315 | HSPB1  | 7041   | TGFB11        | L   |
| 3315 | HSPB1  | 7157   | TP53          | S   |
| 3315 | HSPB1  | 8550   | MAPKAPK5      | L   |
| 3315 | HSPB1  | 10248  | POP7          | L   |
| 3315 | HSPB1  | 26353  | HSPB8         | L   |
| 3315 | HSPB1  | 51003  | MED31         | S   |
| 3315 | HSPB1  | 55791  | C1orf103      | S   |
| 3315 | HSPB1  | 84060  | DKFZP564O0523 | S   |
| 3315 | HSPB1  | 84966  | IGSF21        | S   |
| 3316 | HSPB2  | 8988   | HSPB3         | L   |
| 3320 | HSPCA  | 3551   | IKBKB         | L   |
| 3320 | HSPCA  | 4141   | MARS          | L   |
| 3320 | HSPCA  | 4306   | NR3C2         | L   |
| 3320 | HSPCA  | 4609   | MYC           | L   |
| 3320 | HSPCA  | 4654   | MYOD1         | L   |
| 3320 | HSPCA  | 4846   | NOS3          | L   |
| 3320 | HSPCA  | 4862   | NPAS2         | L   |
| 3320 | HSPCA  | 5170   | PDPK1         | L   |
| 3320 | HSPCA  | 5292   | PIM1          | L   |
| 3320 | HSPCA  | 5465   | PPARA         | L   |
| 3320 | HSPCA  | 5594   | MAPK1         | L   |
| 3320 | HSPCA  | 5610   | EIF2AK2       | L   |
| 3320 | HSPCA  | 5859   | QARS          | L   |
| 3320 | HSPCA  | 5894   | RAF1          | L   |
| 3320 | HSPCA  | 6189   | RPS3A         | S   |
| 3320 | HSPCA  | 6449   | SGTA          | L   |
| 3320 | HSPCA  | 6714   | SRC           | L   |
| 3320 | HSPCA  | 6767   | ST13          | L   |
| 3320 | HSPCA  | 6774   | STAT3         | L   |
| 3320 | HSPCA  | 7132   | TNFRSF1A      | L   |
| 3320 | HSPCA  | 7157   | TP53          | L   |
| 3320 | HSPCA  | 7818   | DAP3          | L   |
| 3320 | HSPCA  | 8517   | IKBKG         | L   |
| 3320 | HSPCA  | 8737   | RIPK1         | L   |
| 3320 | HSPCA  | 9049   | AIP           | L   |
| 3320 | HSPCA  | 9451   | EIF2AK3       | L   |
| 3320 | HSPCA  | 10273  | STUB1         | L   |

|      |        |        |           |   |
|------|--------|--------|-----------|---|
| 3320 | HSPCA  | 10598  | AHSA1     | L |
| 3320 | HSPCA  | 10953  | TOMM34    | L |
| 3320 | HSPCA  | 27257  | LSM1      | L |
| 3320 | HSPCA  | 64754  | SMYD3     | L |
| 3326 | HSPCB  | 4846   | NOS3      | L |
| 3326 | HSPCB  | 57062  | DDX24     | S |
| 3326 | HSPCB  | 90627  | STARD13   | L |
| 3329 | HSPD1  | 3336   | HSPE1     | L |
| 3329 | HSPD1  | 3845   | KRAS      | L |
| 3329 | HSPD1  | 5621   | PRNP      | L |
| 3329 | HSPD1  | 8349   | HIST2H2BE | L |
| 3336 | HSPE1  | 6303   | SAT       | S |
| 3336 | HSPE1  | 7088   | TLE1      | S |
| 3336 | HSPE1  | 7414   | VCL       | L |
| 3336 | HSPE1  | 9094   | UNC119    | S |
| 3336 | HSPE1  | 11161  | C14orf1   | S |
| 3336 | HSPE1  | 11244  | ZHX1      | S |
| 3336 | HSPE1  | 55791  | C1orf103  | S |
| 3337 | DNAJB1 | 5611   | DNAJC3    | L |
| 3337 | DNAJB1 | 10273  | STUB1     | L |
| 3337 | DNAJB1 | 10728  | PTGES3    | L |
| 3339 | HSPG2  | 3688   | ITGB1     | L |
| 3339 | HSPG2  | 5155   | PDGFB     | L |
| 3339 | HSPG2  | 5549   | PRELP     | L |
| 3339 | HSPG2  | 6678   | SPARC     | L |
| 3339 | HSPG2  | 7276   | TTR       | L |
| 3339 | HSPG2  | 9982   | FGFBP1    | L |
| 3339 | HSPG2  | 22795  | NID2      | L |
| 3339 | HSPG2  | 55660  | FNBP3     | L |
| 3339 | HSPG2  | 55729  | ATF7IP    | L |
| 3339 | HSPG2  | 284217 | LAMA1     | L |
| 3350 | HTR1A  | 3351   | HTR1B     | L |
| 3350 | HTR1A  | 3352   | HTR1D     | L |
| 3351 | HTR1B  | 3352   | HTR1D     | L |
| 3356 | HTR2A  | 3717   | JAK2      | L |
| 3358 | HTR2C  | 8777   | MPDZ      | L |
| 3364 | HUS1   | 5111   | PCNA      | L |
| 3364 | HUS1   | 5883   | RAD9A     | L |
| 3364 | HUS1   | 5884   | RAD17     | L |
| 3364 | HUS1   | 7266   | DNAJC7    | L |
| 3371 | TNC    | 3678   | ITGA5     | L |
| 3371 | TNC    | 3688   | ITGB1     | L |
| 3371 | TNC    | 3694   | ITGB6     | L |
| 3371 | TNC    | 5787   | PTPRB     | L |
| 3371 | TNC    | 5829   | PXN       | L |
| 3371 | TNC    | 8516   | ITGA8     | L |
| 3375 | IAPP   | 3651   | IPF1      | L |
| 3375 | IAPP   | 10267  | RAMP1     | L |
| 3383 | ICAM1  | 3559   | IL2RA     | L |
| 3383 | ICAM1  | 3561   | IL2RG     | L |
| 3383 | ICAM1  | 3683   | ITGAL     | L |
| 3383 | ICAM1  | 3684   | ITGAM     | L |
| 3383 | ICAM1  | 3689   | ITGB2     | L |
| 3383 | ICAM1  | 4478   | MSN       | L |
| 3383 | ICAM1  | 7430   | VIL2      | L |
| 3384 | ICAM2  | 3684   | ITGAM     | L |
| 3384 | ICAM2  | 3689   | ITGB2     | L |
| 3384 | ICAM2  | 4478   | MSN       | L |
| 3384 | ICAM2  | 30835  | CD209     | L |
| 3385 | ICAM3  | 3681   | ITGAD     | L |
| 3385 | ICAM3  | 3683   | ITGAL     | L |
| 3385 | ICAM3  | 3689   | ITGB2     | L |
| 3385 | ICAM3  | 4478   | MSN       | L |
| 3385 | ICAM3  | 7430   | VIL2      | L |
| 3385 | ICAM3  | 7704   | ZBTB16    | S |
| 3385 | ICAM3  | 30835  | CD209     | L |
| 3386 | ICAM4  | 3676   | ITGA4     | L |



|      |        |        |               |   |
|------|--------|--------|---------------|---|
| 3386 | ICAM4  | 3684   | ITGAM         | L |
| 3386 | ICAM4  | 3685   | ITGAV         | L |
| 3386 | ICAM4  | 3688   | ITGB1         | L |
| 3386 | ICAM4  | 3689   | ITGB2         | L |
| 3386 | ICAM4  | 6005   | RHAG          | L |
| 3394 | IRF8   | 3659   | IRF1          | L |
| 3394 | IRF8   | 3660   | IRF2          | L |
| 3394 | IRF8   | 6688   | SPI1          | L |
| 3394 | IRF8   | 9318   | COPS2         | L |
| 3397 | ID1    | 4617   | MYF5          | L |
| 3397 | ID1    | 4654   | MYOD1         | L |
| 3397 | ID1    | 8573   | CASK          | L |
| 3398 | ID2    | 4617   | MYF5          | L |
| 3398 | ID2    | 4654   | MYOD1         | L |
| 3398 | ID2    | 6925   | TCF4          | L |
| 3398 | ID2    | 6929   | TCF3          | L |
| 3398 | ID2    | 6938   | TCF12         | L |
| 3398 | ID2    | 9094   | UNC119        | S |
| 3398 | ID2    | 9242   | MSC           | L |
| 3398 | ID2    | 55791  | C1orf103      | S |
| 3398 | ID2    | 84060  | DKFZP564O0523 | S |
| 3399 | ID3    | 4617   | MYF5          | L |
| 3399 | ID3    | 4654   | MYOD1         | L |
| 3399 | ID3    | 5079   | PAX5          | L |
| 3399 | ID3    | 6720   | SREBF1        | L |
| 3399 | ID3    | 6925   | TCF4          | L |
| 3399 | ID3    | 6929   | TCF3          | L |
| 3399 | ID3    | 11036  | ALF           | L |
| 3416 | IDE    | 3479   | IGF1          | L |
| 3416 | IDE    | 3481   | IGF2          | L |
| 3417 | IDH1   | 11244  | ZHX1          | S |
| 3419 | IDH3A  | 3420   | IDH3B         | L |
| 3419 | IDH3A  | 3421   | IDH3G         | L |
| 3420 | IDH3B  | 3421   | IDH3G         | L |
| 3420 | IDH3B  | 11021  | RAB35         | S |
| 3425 | IDUA   | 4356   | MPP3          | S |
| 3428 | IFI16  | 7157   | TP53          | L |
| 3430 | IFI35  | 9111   | NMI           | L |
| 3430 | IFI35  | 10538  | BATF          | L |
| 3431 | SP110  | 4729   | NDUFV2        | S |
| 3433 | IFIT2  | 3437   | IFIT3         | R |
| 3434 | IFIT1  | 3437   | IFIT3         | R |
| 3434 | IFIT1  | 3646   | EIF3S6        | L |
| 3437 | IFIT3  | 159989 | FLJ25393      | R |
| 3439 | IFNA1  | 3558   | IL2           | L |
| 3439 | IFNA1  | 10379  | ISGF3G        | L |
| 3440 | IFNA2  | 3454   | IFNAR1        | L |
| 3440 | IFNA2  | 3455   | IFNAR2        | L |
| 3454 | IFNAR1 | 3456   | IFNB1         | L |
| 3454 | IFNAR1 | 3467   | IFNW1         | L |
| 3454 | IFNAR1 | 5295   | PIK3R1        | L |
| 3454 | IFNAR1 | 5566   | PRKACA        | L |
| 3454 | IFNAR1 | 5594   | MAPK1         | L |
| 3454 | IFNAR1 | 5777   | PTPN6         | L |
| 3454 | IFNAR1 | 5781   | PTPN11        | L |
| 3454 | IFNAR1 | 6773   | STAT2         | L |
| 3454 | IFNAR1 | 6774   | STAT3         | L |
| 3454 | IFNAR1 | 7297   | TYK2          | L |
| 3454 | IFNAR1 | 10399  | GNB2L1        | L |
| 3455 | IFNAR2 | 6773   | STAT2         | L |
| 3455 | IFNAR2 | 10399  | GNB2L1        | L |
| 3458 | IFNG   | 3459   | IFNGR1        | L |
| 3458 | IFNG   | 3460   | IFNGR2        | L |
| 3459 | IFNGR1 | 3460   | IFNGR2        | L |
| 3459 | IFNGR1 | 3716   | JAK1          | L |
| 3460 | IFNGR2 | 3717   | JAK2          | L |
| 3460 | IFNGR2 | 9093   | DNAJA3        | L |

|      |        |       |          |   |
|------|--------|-------|----------|---|
| 3475 | IFRD1  | 6016  | RIT1     | S |
| 3476 | IGBP1  | 4281  | MID1     | L |
| 3476 | IGBP1  | 5515  | PPP2CA   | L |
| 3476 | IGBP1  | 5531  | PPP4C    | L |
| 3476 | IGBP1  | 5537  | PPP6C    | L |
| 3476 | IGBP1  | 11043 | MID2     | L |
| 3479 | IGF1   | 3480  | IGF1R    | L |
| 3479 | IGF1   | 3483  | IGFALS   | L |
| 3479 | IGF1   | 3484  | IGFBP1   | L |
| 3479 | IGF1   | 3485  | IGFBP2   | L |
| 3479 | IGF1   | 3486  | IGFBP3   | L |
| 3479 | IGF1   | 3487  | IGFBP4   | L |
| 3479 | IGF1   | 3488  | IGFBP5   | L |
| 3479 | IGF1   | 3489  | IGFBP6   | L |
| 3479 | IGF1   | 3490  | IGFBP7   | L |
| 3479 | IGF1   | 3547  | IGSF1    | L |
| 3479 | IGF1   | 4856  | NOV      | L |
| 3480 | IGF1R  | 3481  | IGF2     | L |
| 3480 | IGF1R  | 3486  | IGFBP3   | L |
| 3480 | IGF1R  | 3630  | INS      | L |
| 3480 | IGF1R  | 3667  | IRS1     | L |
| 3480 | IGF1R  | 3716  | JAK1     | L |
| 3480 | IGF1R  | 4734  | NEDD4    | L |
| 3480 | IGF1R  | 5295  | PIK3R1   | L |
| 3480 | IGF1R  | 5296  | PIK3R2   | L |
| 3480 | IGF1R  | 5770  | PTPN1    | L |
| 3480 | IGF1R  | 5781  | PTPN11   | L |
| 3480 | IGF1R  | 5921  | RASA1    | L |
| 3480 | IGF1R  | 6464  | SHC1     | L |
| 3480 | IGF1R  | 7529  | YWHAB    | L |
| 3480 | IGF1R  | 7531  | YWHAE    | L |
| 3480 | IGF1R  | 7534  | YWHAZ    | L |
| 3480 | IGF1R  | 8503  | PIK3R3   | L |
| 3480 | IGF1R  | 8651  | SOCS1    | L |
| 3480 | IGF1R  | 8660  | IRS2     | L |
| 3480 | IGF1R  | 8835  | SOCS2    | L |
| 3480 | IGF1R  | 9021  | SOCS3    | L |
| 3480 | IGF1R  | 10399 | GNB2L1   | L |
| 3480 | IGF1R  | 10451 | VAV3     | L |
| 3480 | IGF1R  | 10938 | EHD1     | L |
| 3480 | IGF1R  | 23365 | ARHGEF12 | L |
| 3480 | IGF1R  | 64599 | PERQ1    | L |
| 3481 | IGF2   | 3482  | IGF2R    | L |
| 3481 | IGF2   | 3484  | IGFBP1   | L |
| 3481 | IGF2   | 3485  | IGFBP2   | L |
| 3481 | IGF2   | 3486  | IGFBP3   | L |
| 3481 | IGF2   | 3487  | IGFBP4   | L |
| 3481 | IGF2   | 3488  | IGFBP5   | L |
| 3481 | IGF2   | 3489  | IGFBP6   | L |
| 3481 | IGF2   | 3490  | IGFBP7   | L |
| 3481 | IGF2   | 3643  | INSR     | L |
| 3481 | IGF2   | 4856  | NOV      | L |
| 3481 | IGF2   | 7448  | VTN      | L |
| 3482 | IGF2R  | 5328  | PLAU     | L |
| 3482 | IGF2R  | 8804  | CREG1    | L |
| 3482 | IGF2R  | 10226 | M6PRBP1  | L |
| 3482 | IGF2R  | 23062 | GGA2     | L |
| 3482 | IGF2R  | 23163 | GGA3     | L |
| 3482 | IGF2R  | 26088 | GGA1     | L |
| 3482 | IGF2R  | 55690 | PACS1    | L |
| 3483 | IGFALS | 3486  | IGFBP3   | L |
| 3483 | IGFALS | 3488  | IGFBP5   | L |
| 3484 | IGFBP1 | 7018  | TF       | L |
| 3485 | IGFBP2 | 7018  | TF       | L |
| 3486 | IGFBP3 | 3818  | KLKB1    | L |
| 3486 | IGFBP3 | 3837  | KPNB1    | L |
| 3486 | IGFBP3 | 4052  | LTBP1    | L |

|      |         |       |          |   |
|------|---------|-------|----------|---|
| 3486 | IGFBP3  | 5340  | PLG      | L |
| 3486 | IGFBP3  | 6256  | RXRA     | L |
| 3486 | IGFBP3  | 7018  | TF       | L |
| 3486 | IGFBP3  | 8038  | ADAM12   | L |
| 3486 | IGFBP3  | 23649 | POLA2    | S |
| 3486 | IGFBP3  | 60676 | PAPPA2   | L |
| 3487 | IGFBP4  | 7018  | TF       | L |
| 3488 | IGFBP5  | 3837  | KPNB1    | L |
| 3488 | IGFBP5  | 5054  | SERPINE1 | L |
| 3488 | IGFBP5  | 6696  | SPP1     | L |
| 3488 | IGFBP5  | 7018  | TF       | L |
| 3488 | IGFBP5  | 7057  | THBS1    | L |
| 3488 | IGFBP5  | 7917  | BAT3     | S |
| 3488 | IGFBP5  | 8038  | ADAM12   | L |
| 3488 | IGFBP5  | 56902 | LOC56902 | S |
| 3489 | IGFBP6  | 7018  | TF       | L |
| 3490 | IGFBP7  | 3624  | INHBA    | L |
| 3490 | IGFBP7  | 3627  | CXCL10   | L |
| 3490 | IGFBP7  | 3630  | INS      | L |
| 3490 | IGFBP7  | 6352  | CCL5     | L |
| 3490 | IGFBP7  | 6366  | CCL21    | L |
| 3490 | IGFBP7  | 6382  | SDC1     | L |
| 3490 | IGFBP7  | 7422  | VEGF     | L |
| 3491 | CYR61   | 3685  | ITGAV    | L |
| 3491 | CYR61   | 3693  | ITGB5    | L |
| 3500 | IGHG1   | 3514  | IGKC     | L |
| 3500 | IGHG1   | 3538  | IGLC2    | L |
| 3500 | IGHG1   | 3586  | IL10     | L |
| 3500 | IGHG1   | 23075 | SWAP70   | L |
| 3503 | IGHG4   | 3514  | IGKC     | L |
| 3507 | IGHM    | 3512  | IGJ      | L |
| 3507 | IGHM    | 7441  | VPREB1   | L |
| 3507 | IGHM    | 29802 | VPREB3   | L |
| 3507 | IGHM    | 55722 | Cep72    | R |
| 3508 | IGHMBP2 | 51691 | LSM8     | L |
| 3514 | IGKC    | 7450  | VWF      | L |
| 3516 | RBPSUH  | 4851  | NOTCH1   | L |
| 3516 | RBPSUH  | 4853  | NOTCH2   | L |
| 3516 | RBPSUH  | 4854  | NOTCH3   | L |
| 3516 | RBPSUH  | 8850  | PCAF     | L |
| 3516 | RBPSUH  | 9541  | CIR      | L |
| 3516 | RBPSUH  | 9612  | NCOR2    | L |
| 3516 | RBPSUH  | 22938 | SNW1     | L |
| 3516 | RBPSUH  | 23013 | SPEN     | L |
| 3516 | RBPSUH  | 27044 | SND1     | L |
| 3516 | RBPSUH  | 51684 | SUFU     | L |
| 3537 | IGLC1   | 6449  | SGTA     | R |
| 3537 | IGLC1   | 29979 | UBQLN1   | R |
| 3547 | IGSF1   | 3625  | INHBB    | L |
| 3549 | IHH     | 5727  | PTCH     | L |
| 3549 | IHH     | 8643  | PTCH2    | L |
| 3550 | IK      | 5217  | PFN2     | S |
| 3550 | IK      | 10524 | HTATIP   | S |
| 3550 | IK      | 20924 | (null)   | S |
| 3550 | IK      | 23636 | NUP62    | S |
| 3551 | IKBKB   | 4296  | MAP3K11  | L |
| 3551 | IKBKB   | 4790  | NFKB1    | L |
| 3551 | IKBKB   | 4792  | NFKBIA   | L |
| 3551 | IKBKB   | 5588  | PRKCQ    | L |
| 3551 | IKBKB   | 5610  | EIF2AK2  | L |
| 3551 | IKBKB   | 7128  | TNFAIP3  | L |
| 3551 | IKBKB   | 7132  | TNFRSF1A | L |
| 3551 | IKBKB   | 7186  | TRAF2    | L |
| 3551 | IKBKB   | 8202  | NCOA3    | L |
| 3551 | IKBKB   | 8518  | IKBKAP   | L |
| 3551 | IKBKB   | 8837  | CFLAR    | L |
| 3551 | IKBKB   | 9020  | MAP3K14  | L |

|      |        |       |          |   |
|------|--------|-------|----------|---|
| 3551 | IKBKB  | 9175  | MAP3K13  | L |
| 3551 | IKBKB  | 10010 | TANK     | L |
| 3551 | IKBKB  | 10758 | TRAF3IP2 | L |
| 3551 | IKBKB  | 26133 | TRPC4AP  | L |
| 3552 | IL1A   | 3556  | IL1RAP   | L |
| 3552 | IL1A   | 4692  | NDN      | L |
| 3552 | IL1A   | 4794  | NFKBIE   | L |
| 3552 | IL1A   | 6284  | S100A13  | L |
| 3552 | IL1A   | 7850  | IL1R2    | L |
| 3552 | IL1A   | 10456 | HAX1     | L |
| 3553 | IL1B   | 3554  | IL1R1    | L |
| 3553 | IL1B   | 3556  | IL1RAP   | L |
| 3553 | IL1B   | 5657  | PRTN3    | L |
| 3553 | IL1B   | 7850  | IL1R2    | L |
| 3554 | IL1R1  | 3556  | IL1RAP   | L |
| 3554 | IL1R1  | 3557  | IL1RN    | L |
| 3554 | IL1R1  | 3656  | IRAK2    | L |
| 3554 | IL1R1  | 5295  | PIK3R1   | L |
| 3556 | IL1RAP | 3654  | IRAK1    | L |
| 3556 | IL1RAP | 4615  | MYD88    | L |
| 3556 | IL1RAP | 5295  | PIK3R1   | L |
| 3556 | IL1RAP | 5879  | RAC1     | L |
| 3556 | IL1RAP | 6774  | STAT3    | L |
| 3556 | IL1RAP | 7850  | IL1R2    | L |
| 3556 | IL1RAP | 8809  | IL18R1   | L |
| 3556 | IL1RAP | 54472 | TOLLIP   | L |
| 3556 | IL1RAP | 55660 | FBNP3    | L |
| 3557 | IL1RN  | 7850  | IL1R2    | L |
| 3557 | IL1RN  | 8658  | TNKS     | L |
| 3558 | IL2    | 3559  | IL2RA    | L |
| 3558 | IL2    | 3560  | IL2RB    | L |
| 3558 | IL2    | 3561  | IL2RG    | L |
| 3558 | IL2    | 4804  | NGFR     | L |
| 3558 | IL2    | 6464  | SHC1     | L |
| 3559 | IL2RA  | 3560  | IL2RB    | L |
| 3559 | IL2RA  | 4790  | NFKB1    | L |
| 3559 | IL2RA  | 6774  | STAT3    | L |
| 3559 | IL2RA  | 6777  | STAT5B   | L |
| 3560 | IL2RB  | 3561  | IL2RG    | L |
| 3560 | IL2RB  | 3600  | IL15     | L |
| 3560 | IL2RB  | 3601  | IL15RA   | L |
| 3560 | IL2RB  | 3716  | JAK1     | L |
| 3560 | IL2RB  | 3718  | JAK3     | L |
| 3560 | IL2RB  | 3932  | LCK      | L |
| 3560 | IL2RB  | 5295  | PIK3R1   | L |
| 3560 | IL2RB  | 6461  | SHB      | L |
| 3560 | IL2RB  | 6464  | SHC1     | L |
| 3560 | IL2RB  | 6772  | STAT1    | L |
| 3560 | IL2RB  | 6774  | STAT3    | L |
| 3560 | IL2RB  | 6776  | STAT5A   | L |
| 3560 | IL2RB  | 6777  | STAT5B   | L |
| 3560 | IL2RB  | 8651  | SOCS1    | L |
| 3560 | IL2RB  | 8662  | EIF3S9   | L |
| 3560 | IL2RB  | 10399 | GNB2L1   | L |
| 3561 | IL2RG  | 3565  | IL4      | L |
| 3561 | IL2RG  | 3566  | IL4R     | L |
| 3561 | IL2RG  | 3574  | IL7      | L |
| 3561 | IL2RG  | 3575  | IL7R     | L |
| 3561 | IL2RG  | 3581  | IL9R     | L |
| 3561 | IL2RG  | 3600  | IL15     | L |
| 3561 | IL2RG  | 3601  | IL15RA   | L |
| 3561 | IL2RG  | 3718  | JAK3     | L |
| 3561 | IL2RG  | 5795  | PTPRJ    | L |
| 3561 | IL2RG  | 6461  | SHB      | L |
| 3561 | IL2RG  | 6464  | SHC1     | L |
| 3561 | IL2RG  | 6772  | STAT1    | L |
| 3561 | IL2RG  | 6776  | STAT5A   | L |

|      |       |       |           |   |
|------|-------|-------|-----------|---|
| 3562 | IL3   | 3563  | IL3RA     | L |
| 3562 | IL3   | 5293  | PIK3CD    | L |
| 3565 | IL4   | 3566  | IL4R      | L |
| 3565 | IL4   | 3598  | IL13RA2   | L |
| 3565 | IL4   | 5293  | PIK3CD    | L |
| 3566 | IL4R  | 3596  | IL13      | L |
| 3566 | IL4R  | 3597  | IL13RA1   | L |
| 3566 | IL4R  | 3635  | INPP5D    | L |
| 3566 | IL4R  | 3667  | IRS1      | L |
| 3566 | IL4R  | 3716  | JAK1      | L |
| 3566 | IL4R  | 4687  | NCF1      | L |
| 3566 | IL4R  | 5777  | PTPN6     | L |
| 3566 | IL4R  | 5781  | PTPN11    | L |
| 3566 | IL4R  | 6464  | SHC1      | L |
| 3566 | IL4R  | 6778  | STAT6     | L |
| 3566 | IL4R  | 8660  | IRS2      | L |
| 3566 | IL4R  | 10399 | GNB2L1    | L |
| 3566 | IL4R  | 10425 | ARIH2     | S |
| 3567 | IL5   | 3568  | IL5RA     | L |
| 3568 | IL5RA | 3716  | JAK1      | L |
| 3568 | IL5RA | 3717  | JAK2      | L |
| 3568 | IL5RA | 6386  | SDCBP     | L |
| 3568 | IL5RA | 9094  | UNC119    | L |
| 3569 | IL6   | 3570  | IL6R      | L |
| 3569 | IL6   | 3572  | IL6ST     | L |
| 3569 | IL6   | 5744  | PTHLH     | L |
| 3569 | IL6   | 6456  | SH3GL2    | S |
| 3569 | IL6   | 7704  | ZBTB16    | S |
| 3570 | IL6R  | 3572  | IL6ST     | L |
| 3570 | IL6R  | 6714  | SRC       | L |
| 3570 | IL6R  | 6774  | STAT3     | L |
| 3572 | IL6ST | 3716  | JAK1      | L |
| 3572 | IL6ST | 3976  | LIF       | L |
| 3572 | IL6ST | 3977  | LIFR      | L |
| 3572 | IL6ST | 5008  | OSM       | L |
| 3572 | IL6ST | 5294  | PIK3CG    | L |
| 3572 | IL6ST | 5580  | PRKCD     | L |
| 3572 | IL6ST | 5777  | PTPN6     | L |
| 3572 | IL6ST | 5781  | PTPN11    | L |
| 3572 | IL6ST | 6774  | STAT3     | L |
| 3572 | IL6ST | 7088  | TLE1      | L |
| 3572 | IL6ST | 7297  | TYK2      | L |
| 3572 | IL6ST | 7409  | VAV1      | L |
| 3572 | IL6ST | 9021  | SOCS3     | L |
| 3572 | IL6ST | 9180  | OSMR      | L |
| 3574 | IL7   | 3575  | IL7R      | L |
| 3575 | IL7R  | 4067  | LYN       | L |
| 3575 | IL7R  | 64109 | CRLF2     | L |
| 3575 | IL7R  | 85480 | TSLP      | L |
| 3576 | IL8   | 3577  | IL8RA     | L |
| 3576 | IL8   | 3579  | IL8RB     | L |
| 3576 | IL8   | 6351  | CCL4      | L |
| 3576 | IL8   | 6382  | SDC1      | L |
| 3577 | IL8RA | 5473  | PPBP      | L |
| 3577 | IL8RA | 6372  | CXCL6     | L |
| 3577 | IL8RA | 6374  | CXCL5     | L |
| 3578 | IL9   | 3581  | IL9R      | L |
| 3579 | IL8RB | 5473  | PPBP      | L |
| 3579 | IL8RB | 6002  | RGS12     | L |
| 3579 | IL8RB | 6372  | CXCL6     | L |
| 3579 | IL8RB | 6374  | CXCL5     | L |
| 3579 | IL8RB | 22841 | RAB11FIP2 | L |
| 3581 | IL9R  | 3716  | JAK1      | L |
| 3581 | IL9R  | 7534  | YWHAZ     | L |
| 3581 | IL9R  | 10524 | HTATIP    | L |
| 3586 | IL10  | 3587  | IL10RA    | L |
| 3586 | IL10  | 3588  | IL10RB    | L |

|      |         |        |           |   |
|------|---------|--------|-----------|---|
| 3587 | IL10RA  | 3588   | IL10RB    | L |
| 3587 | IL10RA  | 3716   | JAK1      | L |
| 3588 | IL10RB  | 50616  | IL22      | L |
| 3588 | IL10RB  | 282616 | IL28A     | L |
| 3588 | IL10RB  | 282617 | IL28B     | L |
| 3588 | IL10RB  | 282618 | IL29      | L |
| 3589 | IL11    | 3590   | IL11RA    | L |
| 3589 | IL11    | 4110   | MAGEA11   | R |
| 3592 | IL12A   | 3593   | IL12B     | L |
| 3593 | IL12B   | 3594   | IL12RB1   | L |
| 3593 | IL12B   | 3595   | IL12RB2   | L |
| 3594 | IL12RB1 | 3595   | IL12RB2   | L |
| 3594 | IL12RB1 | 6775   | STAT4     | L |
| 3595 | IL12RB2 | 3717   | JAK2      | L |
| 3595 | IL12RB2 | 6775   | STAT4     | L |
| 3596 | IL13    | 3597   | IL13RA1   | L |
| 3596 | IL13    | 3598   | IL13RA2   | L |
| 3596 | IL13    | 5295   | PIK3R1    | L |
| 3596 | IL13    | 7412   | VCAM1     | L |
| 3597 | IL13RA1 | 7297   | TYK2      | L |
| 3600 | IL15    | 3601   | IL15RA    | L |
| 3601 | IL15RA  | 7186   | TRAF2     | L |
| 3603 | IL16    | 3750   | KCND1     | L |
| 3603 | IL16    | 3751   | KCND2     | L |
| 3603 | IL16    | 3759   | KCNJ2     | L |
| 3603 | IL16    | 3761   | KCNJ4     | L |
| 3603 | IL16    | 3766   | KCNJ10    | L |
| 3603 | IL16    | 3772   | KCNJ15    | L |
| 3603 | IL16    | 4659   | PPP1R12A  | L |
| 3603 | IL16    | 4660   | PPP1R12B  | L |
| 3603 | IL16    | 10534  | SSSCA1    | R |
| 3603 | IL16    | 30008  | EFEMP2    | R |
| 3603 | IL16    | 54776  | PPP1R12C  | L |
| 3603 | IL16    | 63948  | DMRTB1    | R |
| 3603 | IL16    | 83878  | USHBP1    | R |
| 3604 | TNFRSF9 | 7185   | TRAF1     | L |
| 3604 | TNFRSF9 | 7186   | TRAF2     | L |
| 3604 | TNFRSF9 | 7187   | TRAF3     | L |
| 3604 | TNFRSF9 | 8744   | TNFSF9    | L |
| 3605 | IL17    | 23765  | IL17R     | L |
| 3606 | IL18    | 8807   | IL18RAP   | L |
| 3606 | IL18    | 8808   | IL1RL2    | L |
| 3606 | IL18    | 8809   | IL18R1    | L |
| 3606 | IL18    | 10068  | IL18BP    | L |
| 3608 | ILF2    | 3609   | ILF3      | L |
| 3608 | ILF2    | 5610   | EIF2AK2   | L |
| 3609 | ILF3    | 4110   | MAGEA11   | R |
| 3609 | ILF3    | 4188   | MDFI      | R |
| 3609 | ILF3    | 5359   | PLSCR1    | R |
| 3609 | ILF3    | 5591   | PRKDC     | L |
| 3609 | ILF3    | 5610   | EIF2AK2   | L |
| 3609 | ILF3    | 7205   | TRIP6     | R |
| 3609 | ILF3    | 57510  | XPO5      | L |
| 3609 | ILF3    | 83755  | KRTAP4-12 | R |
| 3611 | ILK     | 3688   | ITGB1     | L |
| 3611 | ILK     | 3689   | ITGB2     | L |
| 3611 | ILK     | 3690   | ITGB3     | L |
| 3611 | ILK     | 3987   | LIMS1     | L |
| 3611 | ILK     | 5163   | PDK1      | L |
| 3611 | ILK     | 5829   | PXN       | L |
| 3611 | ILK     | 8440   | NCK2      | L |
| 3611 | ILK     | 55679  | LIMS2     | L |
| 3611 | ILK     | 55742  | PARVA     | R |
| 3613 | IMPA2   | 9709   | HERPUD1   | S |
| 3619 | INCENP  | 23468  | CBX5      | L |
| 3620 | INDO    | 57062  | DDX24     | S |
| 3620 | INDO    | 84988  | PPP1R16A  | S |

|      |        |        |         |   |
|------|--------|--------|---------|---|
| 3621 | ING1   | 5111   | PCNA    | L |
| 3621 | ING1   | 7157   | TP53    | L |
| 3621 | ING1   | 8850   | PCAF    | L |
| 3623 | INHA   | 3624   | INHBA   | L |
| 3623 | INHA   | 3625   | INHBB   | L |
| 3623 | INHA   | 7049   | TGFBR3  | L |
| 3624 | INHBA  | 3625   | INHBB   | L |
| 3624 | INHBA  | 3626   | INHBC   | L |
| 3624 | INHBA  | 7049   | TGFBR3  | L |
| 3624 | INHBA  | 10272  | FSTL3   | L |
| 3624 | INHBA  | 25884  | CHRD2   | L |
| 3625 | INHBB  | 3626   | INHBC   | L |
| 3625 | INHBB  | 130399 | ACVR1C  | L |
| 3628 | INPP1  | 3978   | LIG1    | S |
| 3630 | INS    | 3643   | INSR    | L |
| 3630 | INS    | 4036   | LRP2    | L |
| 3630 | INS    | 4856   | NOV     | L |
| 3630 | INS    | 84817  | TXNL5   | L |
| 3630 | INS    | 94121  | SYTL4   | L |
| 3631 | INPP4A | 4086   | SMAD1   | L |
| 3631 | INPP4A | 5295   | PIK3R1  | L |
| 3632 | INPP5A | 7534   | YWHAZ   | L |
| 3635 | INPP5D | 4067   | LYN     | L |
| 3635 | INPP5D | 5781   | PTPN11  | L |
| 3635 | INPP5D | 6464   | SHC1    | L |
| 3636 | INPPL1 | 6464   | SHC1    | L |
| 3636 | INPPL1 | 9564   | BCAR1   | L |
| 3636 | INPPL1 | 10580  | SORBS1  | L |
| 3638 | INSIG1 | 22937  | SCAP    | L |
| 3640 | INSL3  | 122042 | LGR8    | L |
| 3642 | INSM1  | 4356   | MPP3    | S |
| 3642 | INSM1  | 10381  | TUBB3   | S |
| 3642 | INSM1  | 10580  | SORBS1  | L |
| 3643 | INSR   | 3645   | INSRR   | L |
| 3643 | INSR   | 3667   | IRS1    | L |
| 3643 | INSR   | 3716   | JAK1    | L |
| 3643 | INSR   | 4085   | MAD2L1  | L |
| 3643 | INSR   | 4087   | SMAD2   | L |
| 3643 | INSR   | 5167   | ENPP1   | L |
| 3643 | INSR   | 5295   | PIK3R1  | L |
| 3643 | INSR   | 5580   | PRKCD   | L |
| 3643 | INSR   | 5595   | MAPK3   | L |
| 3643 | INSR   | 5770   | PTPN1   | L |
| 3643 | INSR   | 5777   | PTPN6   | L |
| 3643 | INSR   | 5781   | PTPN11  | L |
| 3643 | INSR   | 5782   | PTPN12  | L |
| 3643 | INSR   | 5792   | PTPRF   | L |
| 3643 | INSR   | 5894   | RAF1    | L |
| 3643 | INSR   | 5921   | RASA1   | L |
| 3643 | INSR   | 6464   | SHC1    | L |
| 3643 | INSR   | 6642   | SNX1    | L |
| 3643 | INSR   | 6643   | SNX2    | L |
| 3643 | INSR   | 7409   | VAV1    | L |
| 3643 | INSR   | 8503   | PIK3R3  | L |
| 3643 | INSR   | 8651   | SOCS1   | L |
| 3643 | INSR   | 8660   | IRS2    | L |
| 3643 | INSR   | 8723   | SNX4    | L |
| 3643 | INSR   | 9021   | SOCS3   | L |
| 3643 | INSR   | 9306   | SOCS6   | L |
| 3643 | INSR   | 10451  | VAV3    | L |
| 3643 | INSR   | 10492  | SYNCRIP | L |
| 3643 | INSR   | 10580  | SORBS1  | L |
| 3643 | INSR   | 10818  | FRS2    | L |
| 3646 | EIF3S6 | 4093   | SMAD9   | L |
| 3646 | EIF3S6 | 4905   | NSF     | S |
| 3646 | EIF3S6 | 7916   | BAT2    | L |
| 3646 | EIF3S6 | 8733   | GPAA1   | S |

|      |        |        |           |   |
|------|--------|--------|-----------|---|
| 3646 | EIF3S6 | 9001   | HAP1      | S |
| 3646 | EIF3S6 | 10900  | RPIP8     | R |
| 3646 | EIF3S6 | 51386  | EIF3S6IP  | L |
| 3646 | EIF3S6 | 57062  | DDX24     | S |
| 3646 | EIF3S6 | 60313  | GPBP1L1   | R |
| 3646 | EIF3S6 | 64708  | COPS7B    | L |
| 3651 | IPF1   | 4760   | NEUROD1   | L |
| 3651 | IPF1   | 6514   | SLC2A2    | L |
| 3651 | IPF1   | 6929   | TCF3      | L |
| 3654 | IRAK1  | 3684   | ITGAM     | L |
| 3654 | IRAK1  | 4615   | MYD88     | L |
| 3654 | IRAK1  | 4916   | NTRK3     | L |
| 3654 | IRAK1  | 5590   | PRKCZ     | L |
| 3654 | IRAK1  | 7097   | TLR2      | L |
| 3654 | IRAK1  | 7189   | TRAF6     | L |
| 3654 | IRAK1  | 8772   | FADD      | L |
| 3654 | IRAK1  | 8878   | SQSTM1    | L |
| 3654 | IRAK1  | 23118  | MAP3K7IP2 | L |
| 3654 | IRAK1  | 51135  | IRAK4     | L |
| 3654 | IRAK1  | 54472  | TOLLIP    | L |
| 3654 | IRAK1  | 92610  | TIFA      | L |
| 3655 | ITGA6  | 3732   | CD82      | L |
| 3655 | ITGA6  | 3921   | RPSA      | L |
| 3655 | ITGA6  | 5829   | PXN       | L |
| 3655 | ITGA6  | 7106   | TSPAN4    | L |
| 3655 | ITGA6  | 10755  | GIPC1     | L |
| 3656 | IRAK2  | 4615   | MYD88     | L |
| 3656 | IRAK2  | 7189   | TRAF6     | L |
| 3656 | IRAK2  | 114609 | TIRAP     | L |
| 3658 | IREB2  | 4904   | YBX1      | L |
| 3659 | IRF1   | 4790   | NFKB1     | L |
| 3659 | IRF1   | 6772   | STAT1     | L |
| 3659 | IRF1   | 8850   | PCAF      | L |
| 3660 | IRF2   | 4790   | NFKB1     | L |
| 3660 | IRF2   | 5970   | RELA      | L |
| 3660 | IRF2   | 8850   | PCAF      | L |
| 3661 | IRF3   | 3663   | IRF5      | L |
| 3661 | IRF3   | 3665   | IRF7      | L |
| 3661 | IRF3   | 5052   | PRDX1     | R |
| 3661 | IRF3   | 5055   | SERPINB2  | L |
| 3662 | IRF4   | 4773   | NFATC2    | L |
| 3662 | IRF4   | 6688   | SPI1      | L |
| 3662 | IRF4   | 6689   | SPIB      | L |
| 3662 | IRF4   | 6778   | STAT6     | L |
| 3662 | IRF4   | 7186   | TRAF2     | R |
| 3667 | IRS1   | 3718   | JAK3      | L |
| 3667 | IRS1   | 5295   | PIK3R1    | L |
| 3667 | IRS1   | 5296   | PIK3R2    | L |
| 3667 | IRS1   | 5580   | PRKCD     | L |
| 3667 | IRS1   | 5599   | MAPK8     | L |
| 3667 | IRS1   | 5601   | MAPK9     | L |
| 3667 | IRS1   | 5747   | PTK2      | L |
| 3667 | IRS1   | 5770   | PTPN1     | L |
| 3667 | IRS1   | 5781   | PTPN11    | L |
| 3667 | IRS1   | 5788   | PTPRC     | L |
| 3667 | IRS1   | 5792   | PTPRF     | L |
| 3667 | IRS1   | 6464   | SHC1      | L |
| 3667 | IRS1   | 7275   | TUB       | L |
| 3667 | IRS1   | 7297   | TYK2      | L |
| 3667 | IRS1   | 7343   | UBTF      | L |
| 3667 | IRS1   | 7529   | YWHAB     | L |
| 3667 | IRS1   | 7531   | YWHAE     | L |
| 3667 | IRS1   | 7534   | YWHAZ     | L |
| 3667 | IRS1   | 8503   | PIK3R3    | L |
| 3667 | IRS1   | 8517   | IKBKG     | L |
| 3667 | IRS1   | 8651   | SOCS1     | L |
| 3667 | IRS1   | 9021   | SOCS3     | L |



|      |        |        |          |   |
|------|--------|--------|----------|---|
| 3667 | IRS1   | 55023  | PHIP     | L |
| 3670 | ISL1   | 4005   | LMO2     | L |
| 3670 | ISL1   | 4009   | LMX1A    | L |
| 3670 | ISL1   | 7025   | NR2F1    | L |
| 3670 | ISL1   | 8022   | LHX3     | L |
| 3670 | ISL1   | 64843  | ISL2     | L |
| 3672 | ITGA1  | 3688   | ITGB1    | L |
| 3672 | ITGA1  | 4146   | MATN1    | L |
| 3672 | ITGA1  | 7094   | TLN1     | L |
| 3672 | ITGA1  | 284217 | LAMA1    | L |
| 3673 | ITGA2  | 4312   | MMP1     | L |
| 3673 | ITGA2  | 284217 | LAMA1    | L |
| 3674 | ITGA2B | 7450   | VWF      | L |
| 3674 | ITGA2B | 10519  | CIB1     | L |
| 3675 | ITGA3  | 3732   | CD82     | L |
| 3675 | ITGA3  | 3909   | LAMA3    | L |
| 3675 | ITGA3  | 5877   | RABIF    | L |
| 3675 | ITGA3  | 7106   | TSPAN4   | L |
| 3676 | ITGA4  | 3695   | ITGB7    | L |
| 3676 | ITGA4  | 3732   | CD82     | L |
| 3676 | ITGA4  | 8726   | EED      | L |
| 3676 | ITGA4  | 9404   | LPXN     | L |
| 3678 | ITGA5  | 3693   | ITGB5    | L |
| 3678 | ITGA5  | 3897   | L1CAM    | L |
| 3678 | ITGA5  | 6696   | SPP1     | L |
| 3678 | ITGA5  | 10755  | GIPC1    | L |
| 3678 | ITGA5  | 11188  | NISCH    | L |
| 3678 | ITGA5  | 27329  | ANGPTL3  | L |
| 3678 | ITGA5  | 80781  | COL18A1  | L |
| 3680 | ITGA9  | 5829   | PXN      | L |
| 3681 | ITGAD  | 3689   | ITGB2    | L |
| 3681 | ITGAD  | 7412   | VCAM1    | L |
| 3682 | ITGAE  | 8726   | EED      | L |
| 3682 | ITGAE  | 55743  | CHFR     | S |
| 3683 | ITGAL  | 7087   | ICAM5    | L |
| 3684 | ITGAM  | 3689   | ITGB2    | L |
| 3684 | ITGAM  | 5329   | PLAUR    | L |
| 3684 | ITGAM  | 83700  | JAM3     | L |
| 3685 | ITGAV  | 3690   | ITGB3    | L |
| 3685 | ITGAV  | 3693   | ITGB5    | L |
| 3685 | ITGAV  | 3694   | ITGB6    | L |
| 3685 | ITGAV  | 3696   | ITGB8    | L |
| 3685 | ITGAV  | 3897   | L1CAM    | L |
| 3685 | ITGAV  | 4313   | MMP2     | L |
| 3685 | ITGAV  | 5029   | P2RY2    | L |
| 3685 | ITGAV  | 5156   | PDGFRA   | L |
| 3685 | ITGAV  | 5747   | PTK2     | L |
| 3685 | ITGAV  | 6696   | SPP1     | L |
| 3685 | ITGAV  | 7040   | TGFB1    | L |
| 3685 | ITGAV  | 10298  | PAK4     | L |
| 3687 | ITGAX  | 83700  | JAM3     | L |
| 3688 | ITGB1  | 3732   | CD82     | L |
| 3688 | ITGB1  | 3959   | LGALS3BP | L |
| 3688 | ITGB1  | 3964   | LGALS8   | L |
| 3688 | ITGB1  | 4179   | MCP      | L |
| 3688 | ITGB1  | 4651   | MYO10    | L |
| 3688 | ITGB1  | 4830   | NME1     | L |
| 3688 | ITGB1  | 5578   | PRKCA    | L |
| 3688 | ITGB1  | 5747   | PTK2     | L |
| 3688 | ITGB1  | 5829   | PXN      | L |
| 3688 | ITGB1  | 6520   | SLC3A2   | L |
| 3688 | ITGB1  | 7057   | THBS1    | L |
| 3688 | ITGB1  | 7094   | TLN1     | L |
| 3688 | ITGB1  | 7106   | TSPAN4   | L |
| 3688 | ITGB1  | 7529   | YWHAB    | L |
| 3688 | ITGB1  | 8515   | ITGA10   | L |
| 3688 | ITGB1  | 8516   | ITGA8    | L |

|      |         |        |          |   |
|------|---------|--------|----------|---|
| 3688 | ITGB1   | 9270   | ITGB1BP1 | L |
| 3688 | ITGB1   | 9448   | MAP4K4   | L |
| 3688 | ITGB1   | 10399  | GNB2L1   | L |
| 3688 | ITGB1   | 10618  | TGOLN2   | L |
| 3688 | ITGB1   | 22801  | ITGA11   | L |
| 3688 | ITGB1   | 26232  | FBXO2    | L |
| 3688 | ITGB1   | 26548  | ITGB1BP2 | L |
| 3688 | ITGB1   | 284217 | LAMA1    | L |
| 3689 | ITGB2   | 3732   | CD82     | L |
| 3689 | ITGB2   | 3827   | KNG1     | L |
| 3689 | ITGB2   | 5657   | PRTN3    | L |
| 3689 | ITGB2   | 5747   | PTK2     | L |
| 3689 | ITGB2   | 7087   | ICAM5    | L |
| 3689 | ITGB2   | 7094   | TLN1     | L |
| 3689 | ITGB2   | 8533   | COPS3    | L |
| 3689 | ITGB2   | 8875   | VNN2     | L |
| 3689 | ITGB2   | 9267   | PSCD1    | L |
| 3689 | ITGB2   | 10048  | RANBP9   | L |
| 3689 | ITGB2   | 10399  | GNB2L1   | L |
| 3689 | ITGB2   | 10666  | CD226    | L |
| 3689 | ITGB2   | 11082  | ESM1     | L |
| 3690 | ITGB3   | 4651   | MYO10    | L |
| 3690 | ITGB3   | 4811   | NID1     | L |
| 3690 | ITGB3   | 5029   | P2RY2    | L |
| 3690 | ITGB3   | 5156   | PDGFRA   | L |
| 3690 | ITGB3   | 5159   | PDGFRB   | L |
| 3690 | ITGB3   | 5175   | PECAM1   | L |
| 3690 | ITGB3   | 5747   | PTK2     | L |
| 3690 | ITGB3   | 7057   | THBS1    | L |
| 3690 | ITGB3   | 7094   | TLN1     | L |
| 3690 | ITGB3   | 10519  | CIB1     | L |
| 3690 | ITGB3   | 23421  | ITGB3BP  | L |
| 3690 | ITGB3   | 27329  | ANGPTL3  | L |
| 3691 | ITGB4   | 3692   | ITGB4BP  | L |
| 3691 | ITGB4   | 5339   | PLEC1    | L |
| 3691 | ITGB4   | 55914  | ERBB2IP  | L |
| 3692 | ITGB4BP | 5160   | PDHA1    | S |
| 3692 | ITGB4BP | 5579   | PRKCB1   | L |
| 3692 | ITGB4BP | 5720   | PSME1    | S |
| 3692 | ITGB4BP | 6128   | RPL6     | S |
| 3692 | ITGB4BP | 7466   | WFS1     | S |
| 3692 | ITGB4BP | 8481   | OFD1     | S |
| 3692 | ITGB4BP | 10240  | MRPS31   | S |
| 3692 | ITGB4BP | 10399  | GNB2L1   | L |
| 3692 | ITGB4BP | 10956  | OS9      | S |
| 3692 | ITGB4BP | 22803  | XRN2     | L |
| 3692 | ITGB4BP | 23032  | USP33    | S |
| 3692 | ITGB4BP | 23649  | POLA2    | S |
| 3692 | ITGB4BP | 28964  | GIT1     | S |
| 3692 | ITGB4BP | 54969  | FLJ20534 | S |
| 3692 | ITGB4BP | 55068  | FLJ10094 | S |
| 3692 | ITGB4BP | 55791  | C1orf103 | S |
| 3692 | ITGB4BP | 55964  | SEPT3    | S |
| 3692 | ITGB4BP | 57562  | KIAA1377 | S |
| 3692 | ITGB4BP | 65109  | UPF3B    | S |
| 3692 | ITGB4BP | 65991  | FUNDC2   | S |
| 3692 | ITGB4BP | 78987  | CRELD1   | S |
| 3692 | ITGB4BP | 84335  | AKT1S1   | S |
| 3692 | ITGB4BP | 116983 | CENTB5   | S |
| 3693 | ITGB5   | 4052   | LTBP1    | L |
| 3693 | ITGB5   | 4054   | LTBP3    | L |
| 3693 | ITGB5   | 4651   | MYO10    | L |
| 3693 | ITGB5   | 5029   | P2RY2    | L |
| 3693 | ITGB5   | 7709   | ZBTB17   | L |
| 3693 | ITGB5   | 10298  | PAK4     | L |
| 3693 | ITGB5   | 10399  | GNB2L1   | L |
| 3693 | ITGB5   | 23421  | ITGB3BP  | L |

|      |       |       |               |   |
|------|-------|-------|---------------|---|
| 3694 | ITGB6 | 7040  | TGFB1         | L |
| 3695 | ITGB7 | 7412  | VCAM1         | L |
| 3695 | ITGB7 | 8174  | MADCAM1       | L |
| 3695 | ITGB7 | 8726  | EED           | L |
| 3695 | ITGB7 | 10399 | GNB2L1        | L |
| 3696 | ITGB8 | 4323  | MMP14         | L |
| 3696 | ITGB8 | 7040  | TGFB1         | L |
| 3698 | ITIH2 | 10653 | SPINT2        | L |
| 3699 | ITIH3 | 10653 | SPINT2        | L |
| 3702 | ITK   | 3836  | KPNA1         | L |
| 3702 | ITK   | 3838  | KPNA2         | L |
| 3702 | ITK   | 3937  | LCP2          | L |
| 3702 | ITK   | 5335  | PLCG1         | L |
| 3702 | ITK   | 5478  | PPIA          | L |
| 3702 | ITK   | 7454  | WAS           | L |
| 3702 | ITK   | 8651  | SOCS1         | L |
| 3702 | ITK   | 10657 | KHDRBS1       | L |
| 3702 | ITK   | 27040 | LAT           | L |
| 3703 | ITM1  | 7812  | CSDE1         | S |
| 3703 | ITM1  | 55355 | DKFZp762E1312 | S |
| 3703 | ITM1  | 81618 | ITM2C         | S |
| 3705 | ITPK1 | 7186  | TRAF2         | R |
| 3707 | ITPKB | 5566  | PRKACA        | L |
| 3707 | ITPKB | 5578  | PRKCA         | L |
| 3707 | ITPKB | 10197 | PSME3         | R |
| 3708 | ITPR1 | 3710  | ITPR3         | L |
| 3708 | ITPR1 | 6262  | RYR2          | L |
| 3708 | ITPR1 | 7223  | TRPC4         | L |
| 3708 | ITPR1 | 9454  | HOMER3        | L |
| 3708 | ITPR1 | 9455  | HOMER2        | L |
| 3708 | ITPR1 | 9456  | HOMER1        | L |
| 3708 | ITPR1 | 10768 | AHCYL1        | L |
| 3708 | ITPR1 | 55024 | BANK1         | L |
| 3708 | ITPR1 | 90627 | STARD13       | L |
| 3709 | ITPR2 | 7223  | TRPC4         | L |
| 3710 | ITPR3 | 7224  | TRPC5         | L |
| 3710 | ITPR3 | 7225  | TRPC6         | L |
| 3710 | ITPR3 | 7226  | TRPM2         | L |
| 3710 | ITPR3 | 10280 | OPRS1         | L |
| 3713 | IVL   | 6707  | SPRR3         | L |
| 3714 | JAG2  | 4851  | NOTCH1        | L |
| 3714 | JAG2  | 4853  | NOTCH2        | L |
| 3714 | JAG2  | 4854  | NOTCH3        | L |
| 3716 | JAK1  | 4192  | MDK           | L |
| 3716 | JAK1  | 5295  | PIK3R1        | L |
| 3716 | JAK1  | 5329  | PLAUR         | L |
| 3716 | JAK1  | 5781  | PTPN11        | L |
| 3716 | JAK1  | 5894  | RAF1          | L |
| 3716 | JAK1  | 6461  | SHB           | L |
| 3716 | JAK1  | 6772  | STAT1         | L |
| 3716 | JAK1  | 6774  | STAT3         | L |
| 3716 | JAK1  | 6776  | STAT5A        | L |
| 3716 | JAK1  | 6850  | SYK           | L |
| 3716 | JAK1  | 7006  | TEC           | L |
| 3716 | JAK1  | 7132  | TNFRSF1A      | L |
| 3716 | JAK1  | 7253  | TSHR          | L |
| 3716 | JAK1  | 7297  | TYK2          | L |
| 3716 | JAK1  | 8651  | SOCS1         | L |
| 3716 | JAK1  | 8660  | IRS2          | L |
| 3716 | JAK1  | 9180  | OSMR          | L |
| 3716 | JAK1  | 10254 | STAM2         | L |
| 3716 | JAK1  | 10399 | GNB2L1        | L |
| 3716 | JAK1  | 10419 | SKB1          | L |
| 3716 | JAK1  | 50615 | IL21R         | L |
| 3717 | JAK2  | 3815  | KIT           | L |
| 3717 | JAK2  | 3953  | LEPR          | L |
| 3717 | JAK2  | 4067  | LYN           | L |

|      |      |        |          |   |
|------|------|--------|----------|---|
| 3717 | JAK2 | 4192   | MDK      | L |
| 3717 | JAK2 | 5295   | PIK3R1   | L |
| 3717 | JAK2 | 5478   | PPIA     | L |
| 3717 | JAK2 | 5519   | PPP2R1B  | L |
| 3717 | JAK2 | 5525   | PPP2R5A  | L |
| 3717 | JAK2 | 5618   | PRLR     | L |
| 3717 | JAK2 | 5747   | PTK2     | L |
| 3717 | JAK2 | 5770   | PTPN1    | L |
| 3717 | JAK2 | 5777   | PTPN6    | L |
| 3717 | JAK2 | 5781   | PTPN11   | L |
| 3717 | JAK2 | 5782   | PTPN12   | L |
| 3717 | JAK2 | 5894   | RAF1     | L |
| 3717 | JAK2 | 6464   | SHC1     | L |
| 3717 | JAK2 | 6774   | STAT3    | L |
| 3717 | JAK2 | 6776   | STAT5A   | L |
| 3717 | JAK2 | 7006   | TEC      | L |
| 3717 | JAK2 | 7132   | TNFRSF1A | L |
| 3717 | JAK2 | 7253   | TSHR     | L |
| 3717 | JAK2 | 7275   | TUB      | L |
| 3717 | JAK2 | 7409   | VAV1     | L |
| 3717 | JAK2 | 7415   | VCP      | L |
| 3717 | JAK2 | 7525   | YES1     | L |
| 3717 | JAK2 | 7852   | CXCR4    | L |
| 3717 | JAK2 | 8027   | STAM     | L |
| 3717 | JAK2 | 8651   | SOCS1    | L |
| 3717 | JAK2 | 9021   | SOCS3    | L |
| 3717 | JAK2 | 9093   | DNAJA3   | L |
| 3717 | JAK2 | 9180   | OSMR     | L |
| 3717 | JAK2 | 10254  | STAM2    | L |
| 3717 | JAK2 | 10419  | SKB1     | L |
| 3717 | JAK2 | 140885 | PTPNS1   | L |
| 3718 | JAK3 | 3932   | LCK      | L |
| 3718 | JAK3 | 5788   | PTPRC    | L |
| 3718 | JAK3 | 6461   | SHB      | L |
| 3718 | JAK3 | 6774   | STAT3    | L |
| 3718 | JAK3 | 6776   | STAT5A   | L |
| 3718 | JAK3 | 7852   | CXCR4    | L |
| 3718 | JAK3 | 8027   | STAM     | L |
| 3718 | JAK3 | 8651   | SOCS1    | L |
| 3718 | JAK3 | 8660   | IRS2     | L |
| 3718 | JAK3 | 9220   | TIAF1    | L |
| 3718 | JAK3 | 10254  | STAM2    | L |
| 3718 | JAK3 | 10419  | SKB1     | L |
| 3725 | JUN  | 3727   | JUND     | L |
| 3725 | JUN  | 4087   | SMAD2    | L |
| 3725 | JUN  | 4088   | SMAD3    | L |
| 3725 | JUN  | 4089   | SMAD4    | L |
| 3725 | JUN  | 4094   | MAF      | L |
| 3725 | JUN  | 4097   | MAFG     | L |
| 3725 | JUN  | 4654   | MYOD1    | L |
| 3725 | JUN  | 4666   | NACA     | L |
| 3725 | JUN  | 4670   | HNRPM    | L |
| 3725 | JUN  | 4779   | NFE2L1   | L |
| 3725 | JUN  | 4780   | NFE2L2   | L |
| 3725 | JUN  | 5300   | PIN1     | L |
| 3725 | JUN  | 5371   | PML      | L |
| 3725 | JUN  | 5449   | POU1F1   | L |
| 3725 | JUN  | 5587   | PRKD1    | L |
| 3725 | JUN  | 5595   | MAPK3    | L |
| 3725 | JUN  | 5599   | MAPK8    | L |
| 3725 | JUN  | 5601   | MAPK9    | L |
| 3725 | JUN  | 5602   | MAPK10   | L |
| 3725 | JUN  | 5891   | RAGE     | L |
| 3725 | JUN  | 5925   | RB1      | L |
| 3725 | JUN  | 5970   | RELA     | L |
| 3725 | JUN  | 6497   | SKI      | L |
| 3725 | JUN  | 6602   | SMARCD1  | L |

|      |      |       |          |    |
|------|------|-------|----------|----|
| 3725 | JUN  | 6667  | SP1      | L  |
| 3725 | JUN  | 6688  | SPI1     | L  |
| 3725 | JUN  | 6689  | SPIB     | L  |
| 3725 | JUN  | 6772  | STAT1    | L  |
| 3725 | JUN  | 6774  | STAT3    | L  |
| 3725 | JUN  | 6775  | STAT4    | L  |
| 3725 | JUN  | 6872  | TAF1     | L  |
| 3725 | JUN  | 6908  | TBP      | L  |
| 3725 | JUN  | 6942  | TCF20    | L  |
| 3725 | JUN  | 7050  | TGIF     | L  |
| 3725 | JUN  | 7153  | TOP2A    | L  |
| 3725 | JUN  | 7329  | UBE2I    | L  |
| 3725 | JUN  | 7421  | VDR      | L  |
| 3725 | JUN  | 7975  | MAFK     | L  |
| 3725 | JUN  | 8061  | FOSL1    | L  |
| 3725 | JUN  | 8204  | NRIP1    | L  |
| 3725 | JUN  | 8550  | MAPKAPK5 | L  |
| 3725 | JUN  | 8648  | NCOA1    | L  |
| 3725 | JUN  | 8841  | HDAC3    | L  |
| 3725 | JUN  | 9188  | DDX21    | L  |
| 3725 | JUN  | 9325  | TRIP4    | L  |
| 3725 | JUN  | 9584  | RNPC2    | L  |
| 3725 | JUN  | 9586  | CREB5    | L  |
| 3725 | JUN  | 9612  | NCOR2    | L  |
| 3725 | JUN  | 10514 | MYBBP1A  | L  |
| 3725 | JUN  | 10538 | BATF     | L  |
| 3725 | JUN  | 10987 | COPS5    | L  |
| 3725 | JUN  | 11016 | ATF7     | L  |
| 3725 | JUN  | 25920 | COBRA1   | L  |
| 3725 | JUN  | 55509 | SNFT     | L  |
| 3725 | JUN  | 55690 | PACS1    | L  |
| 3725 | JUN  | 58487 | ZF       | L  |
| 3725 | JUN  | 60468 | BACH2    | L  |
| 3725 | JUN  | 64326 | RFWD2    | L  |
| 3726 | JUNB | 4088  | SMAD3    | L  |
| 3726 | JUNB | 4089  | SMAD4    | L  |
| 3726 | JUNB | 4097  | MAFG     | L  |
| 3726 | JUNB | 4779  | NFE2L1   | L  |
| 3726 | JUNB | 5599  | MAPK8    | L  |
| 3726 | JUNB | 7975  | MAFK     | L  |
| 3726 | JUNB | 8061  | FOSL1    | RL |
| 3726 | JUNB | 9586  | CREB5    | L  |
| 3726 | JUNB | 10538 | BATF     | L  |
| 3726 | JUNB | 11016 | ATF7     | L  |
| 3726 | JUNB | 22981 | KIAA0980 | R  |
| 3726 | JUNB | 55509 | SNFT     | L  |
| 3727 | JUND | 4089  | SMAD4    | L  |
| 3727 | JUND | 4221  | MEN1     | L  |
| 3727 | JUND | 4779  | NFE2L1   | L  |
| 3727 | JUND | 4780  | NFE2L2   | L  |
| 3727 | JUND | 5599  | MAPK8    | L  |
| 3727 | JUND | 5601  | MAPK9    | L  |
| 3727 | JUND | 6908  | TBP      | L  |
| 3727 | JUND | 7975  | MAFK     | L  |
| 3727 | JUND | 8061  | FOSL1    | L  |
| 3727 | JUND | 9586  | CREB5    | L  |
| 3727 | JUND | 10538 | BATF     | L  |
| 3727 | JUND | 10987 | COPS5    | L  |
| 3727 | JUND | 11016 | ATF7     | L  |
| 3727 | JUND | 55509 | SNFT     | L  |
| 3727 | JUND | 64326 | RFWD2    | L  |
| 3728 | JUP  | 4582  | MUC1     | L  |
| 3728 | JUP  | 4794  | NFKBIE   | R  |
| 3728 | JUP  | 5175  | PECAM1   | L  |
| 3728 | JUP  | 5310  | PKD1     | L  |
| 3728 | JUP  | 5318  | PKP2     | L  |
| 3728 | JUP  | 5784  | PTPN14   | L  |

|      |        |       |          |    |
|------|--------|-------|----------|----|
| 3728 | JUP    | 5792  | PTPRF    | L  |
| 3728 | JUP    | 5795  | PTPRJ    | L  |
| 3728 | JUP    | 5796  | PTPRK    | L  |
| 3728 | JUP    | 6934  | TCF7L2   | L  |
| 3728 | JUP    | 8945  | BTRC     | L  |
| 3728 | JUP    | 9372  | ZFYVE9   | L  |
| 3728 | JUP    | 26150 | RIBC2    | R  |
| 3728 | JUP    | 55093 | C8orf32  | R  |
| 3728 | JUP    | 56998 | CTNNBIP1 | RL |
| 3730 | KAL1   | 6383  | SDC2     | L  |
| 3732 | CD82   | 4035  | LRP1     | L  |
| 3732 | CD82   | 4927  | NUP88    | S  |
| 3732 | CD82   | 93185 | IGSF8    | L  |
| 3735 | KARS   | 5048  | PAFAH1B1 | S  |
| 3735 | KARS   | 7965  | JTV1     | R  |
| 3735 | KARS   | 10817 | FRS3     | S  |
| 3736 | KCNA1  | 23704 | KCNE4    | L  |
| 3737 | KCNA2  | 3739  | KCNA4    | L  |
| 3737 | KCNA2  | 5786  | PTPRA    | L  |
| 3737 | KCNA2  | 7881  | KCNAB1   | L  |
| 3739 | KCNA4  | 6303  | SAT      | S  |
| 3739 | KCNA4  | 9229  | DLGAP1   | L  |
| 3739 | KCNA4  | 56901 | LOC56901 | S  |
| 3745 | KCNB1  | 3755  | KCNG1    | L  |
| 3745 | KCNB1  | 3790  | KCNS3    | L  |
| 3745 | KCNB1  | 5791  | PTPRE    | L  |
| 3745 | KCNB1  | 6616  | SNAP25   | L  |
| 3745 | KCNB1  | 6804  | STX1A    | L  |
| 3750 | KCND1  | 30820 | KCNIP1   | L  |
| 3751 | KCND2  | 23413 | FREQ     | L  |
| 3753 | KCNE1  | 3757  | KCNH2    | L  |
| 3753 | KCNE1  | 3784  | KCNQ1    | L  |
| 3754 | KCNF1  | 3756  | KCNH1    | L  |
| 3756 | KCNH1  | 27133 | KCNH5    | L  |
| 3756 | KCNH1  | 84920 | ALG10    | L  |
| 3757 | KCNH2  | 4726  | NDUFS6   | S  |
| 3757 | KCNH2  | 7531  | YWHAE    | L  |
| 3757 | KCNH2  | 7533  | YWHAH    | L  |
| 3757 | KCNH2  | 9992  | KCNE2    | L  |
| 3757 | KCNH2  | 79577 | CDC73    | S  |
| 3757 | KCNH2  | 84920 | ALG10    | L  |
| 3758 | KCNJ1  | 9351  | SLC9A3R2 | L  |
| 3758 | KCNJ1  | 9368  | SLC9A3R1 | L  |
| 3759 | KCNJ2  | 3764  | KCNJ8    | L  |
| 3759 | KCNJ2  | 3767  | KCNJ11   | L  |
| 3759 | KCNJ2  | 8573  | CASK     | L  |
| 3759 | KCNJ2  | 9495  | AKAP5    | L  |
| 3760 | KCNJ3  | 3765  | KCNJ9    | L  |
| 3761 | KCNJ4  | 8573  | CASK     | L  |
| 3761 | KCNJ4  | 64130 | LIN7B    | L  |
| 3763 | KCNJ6  | 3765  | KCNJ9    | L  |
| 3764 | KCNJ8  | 6833  | ABCC8    | L  |
| 3764 | KCNJ8  | 10060 | ABCC9    | L  |
| 3766 | KCNJ10 | 10207 | INADL    | L  |
| 3767 | KCNJ11 | 3939  | LDHA     | L  |
| 3767 | KCNJ11 | 6833  | ABCC8    | L  |
| 3768 | KCNJ12 | 3983  | ABLIM1   | L  |
| 3768 | KCNJ12 | 6640  | SNTA1    | L  |
| 3768 | KCNJ12 | 6641  | SNTB1    | L  |
| 3768 | KCNJ12 | 6645  | SNTB2    | L  |
| 3768 | KCNJ12 | 8573  | CASK     | L  |
| 3768 | KCNJ12 | 8825  | LIN7A    | L  |
| 3768 | KCNJ12 | 64130 | LIN7B    | L  |
| 3772 | KCNJ15 | 10207 | INADL    | L  |
| 3777 | KCNK3  | 6281  | S100A10  | L  |
| 3784 | KCNQ1  | 9992  | KCNE2    | L  |
| 3784 | KCNQ1  | 10142 | AKAP9    | L  |

|      |         |       |           |   |
|------|---------|-------|-----------|---|
| 3784 | KCNQ1   | 23704 | KCNE4     | L |
| 3785 | KCNQ2   | 3786  | KCNQ3     | L |
| 3785 | KCNQ2   | 10425 | ARIH2     | S |
| 3786 | KCNQ3   | 9132  | KCNQ4     | L |
| 3791 | KDR     | 5335  | PLCG1     | L |
| 3791 | KDR     | 5336  | PLCG2     | L |
| 3791 | KDR     | 6461  | SHB       | L |
| 3791 | KDR     | 6464  | SHC1      | L |
| 3791 | KDR     | 7422  | VEGF      | L |
| 3791 | KDR     | 7424  | VEGFC     | L |
| 3791 | KDR     | 25759 | SHC2      | L |
| 3791 | KDR     | 80781 | COL18A1   | L |
| 3792 | KEL     | 7504  | XK        | L |
| 3797 | KIF3C   | 5683  | PSMA2     | L |
| 3797 | KIF3C   | 11127 | KIF3A     | L |
| 3798 | KIF5A   | 3831  | KNS2      | L |
| 3798 | KIF5A   | 6453  | ITSN1     | S |
| 3798 | KIF5A   | 7159  | TP53BP2   | S |
| 3800 | KIF5C   | 23557 | SNAPAP    | S |
| 3807 | KIR2DS2 | 7305  | TYROBP    | L |
| 3814 | KISS1   | 84634 | GPR54     | L |
| 3815 | KIT     | 3932  | LCK       | L |
| 3815 | KIT     | 4067  | LYN       | L |
| 3815 | KIT     | 4145  | MATK      | L |
| 3815 | KIT     | 4254  | KITLG     | L |
| 3815 | KIT     | 5295  | PIK3R1    | L |
| 3815 | KIT     | 5296  | PIK3R2    | L |
| 3815 | KIT     | 5335  | PLCG1     | L |
| 3815 | KIT     | 5777  | PTPN6     | L |
| 3815 | KIT     | 5781  | PTPN11    | L |
| 3815 | KIT     | 5800  | PTPRO     | L |
| 3815 | KIT     | 6772  | STAT1     | L |
| 3815 | KIT     | 7006  | TEC       | L |
| 3815 | KIT     | 8651  | SOCS1     | L |
| 3815 | KIT     | 8777  | MPDZ      | L |
| 3815 | KIT     | 9402  | GRAP2     | L |
| 3815 | KIT     | 10750 | GRAP      | L |
| 3816 | KLK1    | 5104  | SERPINA5  | L |
| 3816 | KLK1    | 5267  | SERPINA4  | L |
| 3817 | KLK2    | 5104  | SERPINA5  | L |
| 3817 | KLK2    | 5267  | SERPINA4  | L |
| 3817 | KLK2    | 5269  | SERPINB6  | L |
| 3817 | KLK2    | 5345  | SERPINF2  | L |
| 3818 | KLKB1   | 3827  | KNG1      | L |
| 3818 | KLKB1   | 5104  | SERPINA5  | L |
| 3818 | KLKB1   | 7980  | TFPI2     | L |
| 3821 | KLRC1   | 3824  | KLRD1     | L |
| 3821 | KLRC1   | 5777  | PTPN6     | L |
| 3821 | KLRC1   | 5781  | PTPN11    | L |
| 3823 | KLRC3   | 3824  | KLRD1     | L |
| 3823 | KLRC3   | 7305  | TYROBP    | L |
| 3827 | KNG1    | 3848  | KRT1      | L |
| 3827 | KNG1    | 5329  | PLAUR     | L |
| 3827 | KNG1    | 5340  | PLG       | L |
| 3827 | KNG1    | 7057  | THBS1     | L |
| 3827 | KNG1    | 7448  | VTN       | L |
| 3827 | KNG1    | 22918 | C1QR1     | L |
| 3831 | KNS2    | 90678 | LRSAM1    | S |
| 3835 | KIF22   | 6477  | SIAH1     | L |
| 3835 | KIF22   | 10989 | IMMT      | S |
| 3835 | KIF22   | 64219 | PJA1      | S |
| 3836 | KPNA1   | 5079  | PAX5      | L |
| 3836 | KPNA1   | 5896  | RAG1      | L |
| 3836 | KPNA1   | 6728  | SRP19     | L |
| 3836 | KPNA1   | 6772  | STAT1     | L |
| 3836 | KPNA1   | 8290  | HIST3H3   | L |
| 3836 | KPNA1   | 8349  | HIST2H2BE | L |

|      |        |       |           |   |
|------|--------|-------|-----------|---|
| 3836 | KPNA1  | 8543  | LMO4      | L |
| 3836 | KPNA1  | 51176 | LEF1      | L |
| 3836 | KPNA1  | 51366 | EDD1      | L |
| 3837 | KPNB1  | 3838  | KPNA2     | L |
| 3837 | KPNB1  | 3839  | KPNA3     | L |
| 3837 | KPNB1  | 4087  | SMAD2     | L |
| 3837 | KPNB1  | 4088  | SMAD3     | L |
| 3837 | KPNB1  | 4928  | NUP98     | L |
| 3837 | KPNB1  | 5744  | PTHLH     | L |
| 3837 | KPNB1  | 5757  | PTMA      | L |
| 3837 | KPNB1  | 5901  | RAN       | L |
| 3837 | KPNB1  | 5903  | RANBP2    | L |
| 3837 | KPNB1  | 6606  | SMN1      | L |
| 3837 | KPNB1  | 6662  | SOX9      | L |
| 3837 | KPNB1  | 7157  | TP53      | L |
| 3837 | KPNB1  | 9972  | NUP153    | L |
| 3837 | KPNB1  | 10073 | RNUT1     | L |
| 3837 | KPNB1  | 10526 | IPO8      | L |
| 3837 | KPNB1  | 10527 | IPO7      | L |
| 3837 | KPNB1  | 10762 | NUP50     | L |
| 3837 | KPNB1  | 23633 | KPNA6     | L |
| 3837 | KPNB1  | 23636 | NUP62     | L |
| 3837 | KPNB1  | 51366 | EDD1      | L |
| 3838 | KPNA2  | 5079  | PAX5      | L |
| 3838 | KPNA2  | 5324  | PLAG1     | L |
| 3838 | KPNA2  | 5757  | PTMA      | L |
| 3838 | KPNA2  | 5896  | RAG1      | L |
| 3838 | KPNA2  | 5965  | RECQL     | L |
| 3838 | KPNA2  | 5970  | RELA      | L |
| 3838 | KPNA2  | 6446  | SGK       | L |
| 3838 | KPNA2  | 6514  | SLC2A2    | L |
| 3838 | KPNA2  | 7157  | TP53      | L |
| 3838 | KPNA2  | 10762 | NUP50     | L |
| 3838 | KPNA2  | 51176 | LEF1      | L |
| 3838 | KPNA2  | 51366 | EDD1      | L |
| 3839 | KPNA3  | 7052  | TGM2      | L |
| 3839 | KPNA3  | 26240 | FAM50B    | R |
| 3840 | KPNA4  | 5965  | RECQL     | L |
| 3840 | KPNA4  | 7052  | TGM2      | L |
| 3842 | TNPO1  | 4928  | NUP98     | L |
| 3842 | TNPO1  | 5901  | RAN       | L |
| 3842 | TNPO1  | 5903  | RANBP2    | L |
| 3842 | TNPO1  | 6125  | RPL5      | L |
| 3842 | TNPO1  | 6201  | RPS7      | L |
| 3842 | TNPO1  | 6728  | SRP19     | L |
| 3842 | TNPO1  | 8021  | NUP214    | L |
| 3842 | TNPO1  | 8106  | PABPN1    | L |
| 3842 | TNPO1  | 8290  | HIST3H3   | L |
| 3842 | TNPO1  | 8349  | HIST2H2BE | L |
| 3842 | TNPO1  | 9972  | NUP153    | L |
| 3842 | TNPO1  | 10482 | NXF1      | L |
| 3842 | TNPO1  | 84220 | RANBP2L1  | L |
| 3843 | RANBP5 | 4928  | NUP98     | L |
| 3843 | RANBP5 | 5897  | RAG2      | L |
| 3843 | RANBP5 | 5901  | RAN       | L |
| 3843 | RANBP5 | 5903  | RANBP2    | L |
| 3843 | RANBP5 | 6125  | RPL5      | L |
| 3843 | RANBP5 | 6201  | RPS7      | L |
| 3843 | RANBP5 | 8021  | NUP214    | L |
| 3843 | RANBP5 | 9972  | NUP153    | L |
| 3843 | RANBP5 | 23636 | NUP62     | L |
| 3845 | KRAS   | 5294  | PIK3CG    | L |
| 3845 | KRAS   | 5910  | RAP1GDS1  | L |
| 3845 | KRAS   | 8036  | SHOC2     | L |
| 3845 | KRAS   | 10235 | RASGRP2   | L |
| 3845 | KRAS   | 83593 | RASSF5    | L |
| 3848 | KRT1   | 4153  | MBL2      | L |



|      |       |        |           |   |
|------|-------|--------|-----------|---|
| 3848 | KRT1  | 5581   | PRKCE     | L |
| 3852 | KRT5  | 3861   | KRT14     | L |
| 3852 | KRT5  | 3875   | KRT18     | L |
| 3852 | KRT5  | 5318   | PKP2      | L |
| 3853 | KRT6A | 3866   | KRT15     | R |
| 3853 | KRT6A | 3872   | KRT17     | R |
| 3853 | KRT6A | 11007  | DIPA      | R |
| 3853 | KRT6A | 51019  | CGI-116   | R |
| 3854 | KRT6B | 3866   | KRT15     | R |
| 3854 | KRT6B | 3880   | KRT19     | R |
| 3855 | KRT7  | 7805   | LAPTM5    | L |
| 3855 | KRT7  | 8661   | EIF3S10   | L |
| 3855 | KRT7  | 55729  | ATF7IP    | L |
| 3856 | KRT8  | 5317   | PKP1      | L |
| 3856 | KRT8  | 5327   | PLAT      | L |
| 3856 | KRT8  | 5411   | PNN       | L |
| 3858 | KRT10 | 5590   | PRKCZ     | L |
| 3861 | KRT14 | 5317   | PKP1      | L |
| 3861 | KRT14 | 8717   | TRADD     | L |
| 3866 | KRT15 | 3875   | KRT18     | R |
| 3866 | KRT15 | 3880   | KRT19     | R |
| 3866 | KRT15 | 3887   | KRTHB1    | R |
| 3866 | KRT15 | 3983   | ABLIM1    | R |
| 3866 | KRT15 | 5108   | PCM1      | R |
| 3866 | KRT15 | 5630   | PRPH      | R |
| 3866 | KRT15 | 5682   | PSMA1     | R |
| 3866 | KRT15 | 5705   | PSMC5     | R |
| 3866 | KRT15 | 6602   | SMARCD1   | R |
| 3866 | KRT15 | 7251   | TSG101    | R |
| 3866 | KRT15 | 9099   | USP2      | R |
| 3866 | KRT15 | 9587   | MAD2L1BP  | R |
| 3866 | KRT15 | 9729   | KIAA0408  | R |
| 3866 | KRT15 | 10152  | ABI2      | R |
| 3866 | KRT15 | 11067  | C10orf10  | R |
| 3866 | KRT15 | 11170  | TU3A      | R |
| 3866 | KRT15 | 23237  | ARC       | R |
| 3866 | KRT15 | 23641  | LDOC1     | R |
| 3866 | KRT15 | 26150  | RIBC2     | R |
| 3866 | KRT15 | 27229  | 76P       | R |
| 3866 | KRT15 | 27332  | ZNF638    | R |
| 3866 | KRT15 | 51061  | TXNDC11   | R |
| 3866 | KRT15 | 51225  | ABI3      | R |
| 3866 | KRT15 | 51322  | WAC       | R |
| 3866 | KRT15 | 51421  | AMOTL2    | R |
| 3866 | KRT15 | 54474  | KRT20     | R |
| 3866 | KRT15 | 55388  | MCM10     | R |
| 3866 | KRT15 | 55758  | RCOR3     | R |
| 3866 | KRT15 | 56243  | KIAA1217  | R |
| 3866 | KRT15 | 57658  | CALCOCO1  | R |
| 3866 | KRT15 | 60491  | NIF3L1    | R |
| 3866 | KRT15 | 79050  | NOC4L     | R |
| 3866 | KRT15 | 79696  | C14orf140 | R |
| 3866 | KRT15 | 79873  | NUDT18    | R |
| 3866 | KRT15 | 83878  | USHBP1    | R |
| 3866 | KRT15 | 84260  | MGC10854  | R |
| 3866 | KRT15 | 84708  | LNX       | R |
| 3866 | KRT15 | 84832  | MGC12538  | R |
| 3866 | KRT15 | 85359  | DGCR6L    | R |
| 3866 | KRT15 | 90060  | JM11      | R |
| 3866 | KRT15 | 112869 | LOC112869 | R |
| 3866 | KRT15 | 114822 | RHPN1     | R |
| 3866 | KRT15 | 127703 | FLJ38984  | R |
| 3866 | KRT15 | 149371 | EXOC8     | R |
| 3866 | KRT15 | 150483 | MGC27019  | R |
| 3866 | KRT15 | 164127 | C1orf65   | R |
| 3866 | KRT15 | 284058 | LOC284058 | R |
| 3872 | KRT17 | 11007  | DIPA      | R |

|      |        |        |           |   |
|------|--------|--------|-----------|---|
| 3875 | KRT18  | 5310   | PKD1      | L |
| 3875 | KRT18  | 5318   | PKP2      | L |
| 3875 | KRT18  | 5411   | PNN       | L |
| 3875 | KRT18  | 5581   | PRKCE     | L |
| 3875 | KRT18  | 7133   | TNFRSF1B  | L |
| 3875 | KRT18  | 7399   | USH2A     | L |
| 3875 | KRT18  | 7529   | YWHAB     | L |
| 3875 | KRT18  | 7531   | YWHAE     | L |
| 3875 | KRT18  | 7532   | YWHAG     | L |
| 3875 | KRT18  | 7533   | YWHAH     | L |
| 3875 | KRT18  | 7534   | YWHAZ     | L |
| 3875 | KRT18  | 8717   | TRADD     | L |
| 3875 | KRT18  | 9146   | HGS       | R |
| 3875 | KRT18  | 9191   | DEDD      | L |
| 3875 | KRT18  | 10049  | DNAJB6    | L |
| 3875 | KRT18  | 11007  | DIPA      | R |
| 3875 | KRT18  | 23641  | LDOC1     | R |
| 3875 | KRT18  | 27229  | 76P       | R |
| 3875 | KRT18  | 29922  | NME7      | R |
| 3875 | KRT18  | 85415  | RHPN2     | L |
| 3875 | KRT18  | 149371 | EXOC8     | R |
| 3880 | KRT19  | 5108   | PCM1      | R |
| 3880 | KRT19  | 5411   | PNN       | L |
| 3880 | KRT19  | 9146   | HGS       | R |
| 3880 | KRT19  | 9814   | SFI1      | R |
| 3880 | KRT19  | 10152  | ABI2      | R |
| 3880 | KRT19  | 11067  | C10orf10  | R |
| 3880 | KRT19  | 11170  | TU3A      | R |
| 3880 | KRT19  | 27332  | ZNF638    | R |
| 3880 | KRT19  | 83878  | USHBP1    | R |
| 3880 | KRT19  | 85359  | DGCR6L    | R |
| 3880 | KRT19  | 149371 | EXOC8     | R |
| 3887 | KRTHB1 | 6498   | SKIL      | L |
| 3887 | KRTHB1 | 79036  | MGC2749   | R |
| 3895 | KTN1   | 5879   | RAC1      | L |
| 3897 | L1CAM  | 4478   | MSN       | L |
| 3897 | L1CAM  | 4684   | NCAM1     | L |
| 3897 | L1CAM  | 5962   | RDX       | L |
| 3897 | L1CAM  | 6900   | CNTN2     | L |
| 3897 | L1CAM  | 7430   | VIL2      | L |
| 3897 | L1CAM  | 8650   | NUMB      | L |
| 3897 | L1CAM  | 8682   | PEA15     | S |
| 3902 | LAG3   | 10153  | CEBPZ     | L |
| 3902 | LAG3   | 55835  | CENPJ     | L |
| 3903 | LAIR1  | 4072   | TACSTD1   | L |
| 3903 | LAIR1  | 5777   | PTPN6     | L |
| 3903 | LAIR1  | 5781   | PTPN11    | L |
| 3906 | LALBA  | 8349   | HIST2H2BE | L |
| 3908 | LAMA2  | 3921   | RPSA      | L |
| 3909 | LAMA3  | 3914   | LAMB3     | L |
| 3909 | LAMA3  | 5327   | PLAT      | L |
| 3909 | LAMA3  | 5340   | PLG       | L |
| 3909 | LAMA3  | 6383   | SDC2      | L |
| 3909 | LAMA3  | 79939  | SLC35E1   | S |
| 3910 | LAMA4  | 5764   | PTN       | S |
| 3910 | LAMA4  | 7157   | TP53      | S |
| 3910 | LAMA4  | 7280   | TUBB2     | S |
| 3910 | LAMA4  | 9094   | UNC119    | S |
| 3910 | LAMA4  | 10980  | COPS6     | S |
| 3910 | LAMA4  | 11244  | ZHX1      | S |
| 3910 | LAMA4  | 29117  | BRD7      | S |
| 3910 | LAMA4  | 51003  | MED31     | S |
| 3910 | LAMA4  | 55729  | ATF7IP    | L |
| 3910 | LAMA4  | 55791  | C1orf103  | S |
| 3910 | LAMA4  | 197131 | UBR1      | S |
| 3910 | LAMA4  | 222019 | (null)    | S |
| 3911 | LAMA5  | 3915   | LAMC1     | L |

|      |       |       |         |   |
|------|-------|-------|---------|---|
| 3911 | LAMA5 | 4059  | LU      | L |
| 3911 | LAMA5 | 4087  | SMAD2   | L |
| 3911 | LAMA5 | 4224  | MEP1A   | L |
| 3911 | LAMA5 | 9900  | SV2A    | L |
| 3911 | LAMA5 | 55729 | ATF7IP  | L |
| 3911 | LAMA5 | 84280 | BTBD10  | S |
| 3913 | LAMB2 | 57473 | GM632   | L |
| 3914 | LAMB3 | 3918  | LAMC2   | L |
| 3914 | LAMB3 | 7057  | THBS1   | L |
| 3915 | LAMC1 | 4811  | NID1    | L |
| 3915 | LAMC1 | 22795 | NID2    | L |
| 3915 | LAMC1 | 23557 | SNAPAP  | S |
| 3915 | LAMC1 | 51019 | CGI-116 | S |
| 3915 | LAMC1 | 55729 | ATF7IP  | L |
| 3916 | LAMP1 | 8907  | AP1M1   | L |
| 3920 | LAMP2 | 6622  | SNCA    | L |
| 3921 | RPSA  | 5829  | PXN     | L |
| 3921 | RPSA  | 6227  | RPS21   | S |
| 3921 | RPSA  | 7414  | VCL     | L |
| 3921 | RPSA  | 23468 | CBX5    | L |
| 3927 | LASP1 | 4188  | MDFI    | R |
| 3927 | LASP1 | 5359  | PLSCR1  | R |
| 3927 | LASP1 | 9319  | TRIP13  | R |
| 3929 | LBP   | 6227  | RPS21   | L |
| 3930 | LBR   | 4001  | LMNB1   | L |
| 3930 | LBR   | 11335 | CBX3    | L |
| 3930 | LBR   | 23360 | FNBP4   | L |
| 3930 | LBR   | 23468 | CBX5    | L |
| 3930 | LBR   | 26993 | AKAP8L  | L |
| 3932 | LCK   | 4851  | NOTCH1  | L |
| 3932 | LCK   | 5175  | PECAM1  | L |
| 3932 | LCK   | 5290  | PIK3CA  | L |
| 3932 | LCK   | 5295  | PIK3R1  | L |
| 3932 | LCK   | 5335  | PLCG1   | L |
| 3932 | LCK   | 5338  | PLD2    | L |
| 3932 | LCK   | 5777  | PTPN6   | L |
| 3932 | LCK   | 5781  | PTPN11  | L |
| 3932 | LCK   | 5788  | PTPRC   | L |
| 3932 | LCK   | 5829  | PXN     | L |
| 3932 | LCK   | 5894  | RAF1    | L |
| 3932 | LCK   | 6774  | STAT3   | L |
| 3932 | LCK   | 6850  | SYK     | L |
| 3932 | LCK   | 7010  | TEK     | L |
| 3932 | LCK   | 7070  | THY1    | L |
| 3932 | LCK   | 7275  | TUB     | L |
| 3932 | LCK   | 7535  | ZAP70   | L |
| 3932 | LCK   | 8631  | SCAP1   | L |
| 3932 | LCK   | 8751  | ADAM15  | L |
| 3932 | LCK   | 8878  | SQSTM1  | L |
| 3932 | LCK   | 9046  | DOK2    | L |
| 3932 | LCK   | 9094  | UNC119  | L |
| 3932 | LCK   | 9564  | BCAR1   | L |
| 3932 | LCK   | 10019 | LNK     | L |
| 3932 | LCK   | 10657 | KHDRBS1 | L |
| 3932 | LCK   | 27240 | SIT1    | L |
| 3932 | LCK   | 55824 | PAG1    | L |
| 3932 | LCK   | 59341 | TRPV4   | L |
| 3933 | LCN1  | 4057  | LTF     | L |
| 3933 | LCN1  | 4069  | LYZ     | L |
| 3934 | LCN2  | 4313  | MMP2    | L |
| 3934 | LCN2  | 4318  | MMP9    | L |
| 3936 | LCP1  | 25801 | GCA     | L |
| 3937 | LCP2  | 4067  | LYN     | L |
| 3937 | LCP2  | 4690  | NCK1    | L |
| 3937 | LCP2  | 5335  | PLCG1   | L |
| 3937 | LCP2  | 5336  | PLCG2   | L |
| 3937 | LCP2  | 5777  | PTPN6   | L |

|      |          |       |          |    |
|------|----------|-------|----------|----|
| 3937 | LCP2     | 5788  | PTPRC    | L  |
| 3937 | LCP2     | 6461  | SHB      | L  |
| 3937 | LCP2     | 6464  | SHC1     | L  |
| 3937 | LCP2     | 6850  | SYK      | L  |
| 3937 | LCP2     | 7409  | VAV1     | L  |
| 3937 | LCP2     | 7454  | WAS      | L  |
| 3937 | LCP2     | 9402  | GRAP2    | RL |
| 3937 | LCP2     | 11184 | MAP4K1   | L  |
| 3937 | LCP2     | 27040 | LAT      | L  |
| 3937 | LCP2     | 55824 | PAG1     | L  |
| 3937 | LCP2     | 84106 | PRAM1    | L  |
| 3939 | LDHA     | 7414  | VCL      | L  |
| 3939 | LDHA     | 8655  | DNCL1    | L  |
| 3939 | LDHA     | 10060 | ABCC9    | L  |
| 3939 | LDHA     | 54464 | XRN1     | L  |
| 3949 | LDLR     | 4043  | LRPAP1   | L  |
| 3949 | LDLR     | 5196  | PF4      | L  |
| 3949 | LDLR     | 9784  | SNX17    | L  |
| 3949 | LDLR     | 10053 | AP1M2    | L  |
| 3949 | LDLR     | 26119 | LDLRAP1  | L  |
| 3952 | LEP      | 3953  | LEPR     | L  |
| 3952 | LEP      | 5563  | PRKAA2   | L  |
| 3952 | LEP      | 51738 | GHRL     | L  |
| 3953 | LEPR     | 5300  | PIN1     | S  |
| 3953 | LEPR     | 5781  | PTPN11   | L  |
| 3953 | LEPR     | 6642  | SNX1     | L  |
| 3953 | LEPR     | 6643  | SNX2     | L  |
| 3953 | LEPR     | 6774  | STAT3    | L  |
| 3953 | LEPR     | 8525  | DGKZ     | L  |
| 3953 | LEPR     | 8723  | SNX4     | L  |
| 3953 | LEPR     | 9021  | SOCS3    | L  |
| 3955 | LFNG     | 4851  | NOTCH1   | L  |
| 3955 | LFNG     | 4853  | NOTCH2   | L  |
| 3956 | LGALS1   | 3959  | LGALS3BP | L  |
| 3956 | LGALS1   | 5788  | PTPRC    | L  |
| 3956 | LGALS1   | 5829  | PXN      | L  |
| 3956 | LGALS1   | 6693  | SPN      | L  |
| 3956 | LGALS1   | 7414  | VCL      | L  |
| 3956 | LGALS1   | 50628 | GEMIN4   | L  |
| 3956 | LGALS1   | 94025 | MUC16    | L  |
| 3957 | LGALS2   | 4049  | LTA      | L  |
| 3958 | LGALS3   | 3959  | LGALS3BP | L  |
| 3958 | LGALS3   | 3982  | LIM2     | L  |
| 3958 | LGALS3   | 8029  | CUBN     | L  |
| 3958 | LGALS3   | 50628 | GEMIN4   | L  |
| 3958 | LGALS3   | 51684 | SUFU     | L  |
| 3959 | LGALS3BP | 4811  | NID1     | L  |
| 3959 | LGALS3BP | 7414  | VCL      | L  |
| 3960 | LGALS4   | 10094 | ARPC3    | S  |
| 3960 | LGALS4   | 22800 | RRAS2    | S  |
| 3960 | LGALS4   | 57670 | KIAA1549 | S  |
| 3964 | LGALS8   | 10241 | NDP52    | R  |
| 3972 | LHB      | 3973  | LHCGR    | L  |
| 3973 | LHCGR    | 7253  | TSHR     | L  |
| 3976 | LIF      | 3977  | LIFR     | L  |
| 3977 | LIFR     | 5008  | OSM      | L  |
| 3977 | LIFR     | 5335  | PLCG1    | L  |
| 3977 | LIFR     | 5451  | POU2F1   | L  |
| 3977 | LIFR     | 5777  | PTPN6    | L  |
| 3977 | LIFR     | 5781  | PTPN11   | L  |
| 3978 | LIG1     | 4361  | MRE11A   | L  |
| 3978 | LIG1     | 5111  | PCNA     | L  |
| 3978 | LIG1     | 10381 | TUBB3    | S  |
| 3980 | LIG3     | 7515  | XRCC1    | L  |
| 3980 | LIG3     | 79661 | NEIL1    | L  |
| 3983 | ABLIM1   | 7186  | TRAF2    | R  |
| 3983 | ABLIM1   | 7431  | VIM      | R  |

|      |        |        |          |   |
|------|--------|--------|----------|---|
| 3983 | ABLIM1 | 10241  | NDP52    | R |
| 3983 | ABLIM1 | 23641  | LDOC1    | R |
| 3983 | ABLIM1 | 29911  | HOOK2    | R |
| 3983 | ABLIM1 | 57596  | KIAA1446 | R |
| 3983 | ABLIM1 | 81628  | TSC22D4  | R |
| 3983 | ABLIM1 | 83878  | USHBP1   | R |
| 3984 | LIMK1  | 3985   | LIMK2    | L |
| 3984 | LIMK1  | 5058   | PAK1     | L |
| 3984 | LIMK1  | 6093   | ROCK1    | L |
| 3984 | LIMK1  | 7534   | YWHAZ    | L |
| 3984 | LIMK1  | 9113   | LATS1    | L |
| 3984 | LIMK1  | 10298  | PAK4     | L |
| 3984 | LIMK1  | 51132  | RNF12    | L |
| 3985 | LIMK2  | 10114  | HIPK3    | L |
| 3987 | LIMS1  | 5932   | RBBP8    | R |
| 3987 | LIMS1  | 8440   | NCK2     | L |
| 3987 | LIMS1  | 9404   | LPXN     | R |
| 3987 | LIMS1  | 10919  | EHMT2    | R |
| 3990 | LIPC   | 4035   | LRP1     | L |
| 3991 | LIPE   | 6770   | STAR     | L |
| 3991 | LIPE   | 55968  | NSFL1C   | S |
| 3996 | LLGL1  | 4179   | MCP      | L |
| 3996 | LLGL1  | 65057  | ACD      | S |
| 3998 | LMAN1  | 90411  | MCFD2    | L |
| 4000 | LMNA   | 4001   | LMNB1    | L |
| 4000 | LMNA   | 5578   | PRKCA    | L |
| 4000 | LMNA   | 5829   | PXN      | L |
| 4000 | LMNA   | 5925   | RB1      | L |
| 4000 | LMNA   | 6720   | SREBF1   | L |
| 4000 | LMNA   | 7112   | TMPO     | L |
| 4000 | LMNA   | 8187   | ZNF239   | L |
| 4000 | LMNA   | 9816   | KIAA0133 | L |
| 4000 | LMNA   | 10524  | HTATIP   | S |
| 4000 | LMNA   | 23345  | SYNE1    | L |
| 4000 | LMNA   | 26502  | NARF     | L |
| 4001 | LMNB1  | 5578   | PRKCA    | L |
| 4001 | LMNB1  | 5579   | PRKCB1   | L |
| 4001 | LMNB1  | 5580   | PRKCD    | L |
| 4001 | LMNB1  | 5630   | PRPH     | L |
| 4001 | LMNB1  | 7112   | TMPO     | L |
| 4001 | LMNB1  | 9816   | KIAA0133 | L |
| 4004 | LMO1   | 4066   | LYL1     | L |
| 4004 | LMO1   | 4807   | NHLH1    | L |
| 4004 | LMO1   | 6886   | TAL1     | L |
| 4004 | LMO1   | 6887   | TAL2     | L |
| 4005 | LMO2   | 4066   | LYL1     | L |
| 4005 | LMO2   | 4301   | MLLT4    | L |
| 4005 | LMO2   | 4807   | NHLH1    | L |
| 4005 | LMO2   | 5927   | JARID1A  | L |
| 4005 | LMO2   | 5932   | RBBP8    | L |
| 4005 | LMO2   | 6772   | STAT1    | R |
| 4005 | LMO2   | 6886   | TAL1     | L |
| 4005 | LMO2   | 6887   | TAL2     | L |
| 4005 | LMO2   | 9802   | DAZAP2   | R |
| 4005 | LMO2   | 10919  | EHMT2    | R |
| 4005 | LMO2   | 10982  | MAPRE2   | R |
| 4005 | LMO2   | 22924  | MAPRE3   | R |
| 4005 | LMO2   | 51132  | RNF12    | L |
| 4008 | LMO7   | 337867 | PHGDHL1  | S |
| 4012 | LNPEP  | 4093   | SMAD9    | L |
| 4012 | LNPEP  | 8658   | TNKS     | L |
| 4012 | LNPEP  | 25865  | PRKD2    | L |
| 4012 | LNPEP  | 29109  | FHOD1    | L |
| 4014 | LOR    | 7431   | VIM      | S |
| 4016 | LOXL1  | 10516  | FBLN5    | L |
| 4018 | LPA    | 4036   | LRP2     | L |
| 4018 | LPA    | 10516  | FBLN5    | L |

|      |       |        |          |   |
|------|-------|--------|----------|---|
| 4023 | LPL   | 4035   | LRP1     | L |
| 4023 | LPL   | 4036   | LRP2     | L |
| 4023 | LPL   | 5775   | PTPN4    | S |
| 4023 | LPL   | 6142   | RPL18A   | S |
| 4023 | LPL   | 7436   | VLDLR    | L |
| 4023 | LPL   | 10980  | COPS6    | S |
| 4023 | LPL   | 51631  | LUC7L2   | S |
| 4023 | LPL   | 57562  | KIAA1377 | S |
| 4023 | LPL   | 65264  | FLJ13855 | S |
| 4023 | LPL   | 84164  | ASCC2    | S |
| 4023 | LPL   | 374923 | (null)   | S |
| 4026 | LPP   | 7408   | VASP     | L |
| 4026 | LPP   | 9551   | ATP5J2   | S |
| 4026 | LPP   | 51374  | C2orf28  | S |
| 4026 | LPP   | 257218 | SHPRH    | S |
| 4034 | LRCH4 | 4188   | MDFI     | R |
| 4034 | LRCH4 | 57142  | RTN4     | R |
| 4035 | LRP1  | 4043   | LRPAP1   | L |
| 4035 | LRP1  | 4057   | LTF      | L |
| 4035 | LRP1  | 4192   | MDK      | L |
| 4035 | LRP1  | 4322   | MMP13    | L |
| 4035 | LRP1  | 4323   | MMP14    | L |
| 4035 | LRP1  | 4324   | MMP15    | L |
| 4035 | LRP1  | 4325   | MMP16    | L |
| 4035 | LRP1  | 4326   | MMP17    | L |
| 4035 | LRP1  | 5045   | FURIN    | L |
| 4035 | LRP1  | 5054   | SERPINE1 | L |
| 4035 | LRP1  | 5155   | PDGFB    | L |
| 4035 | LRP1  | 5265   | SERPINA1 | L |
| 4035 | LRP1  | 5327   | PLAT     | L |
| 4035 | LRP1  | 5329   | PLAUR    | L |
| 4035 | LRP1  | 5829   | PXN      | L |
| 4035 | LRP1  | 6328   | SCN3A    | L |
| 4035 | LRP1  | 6464   | SHC1     | L |
| 4035 | LRP1  | 6498   | SKIL     | L |
| 4035 | LRP1  | 7057   | THBS1    | L |
| 4035 | LRP1  | 7094   | TLN1     | L |
| 4035 | LRP1  | 7184   | TRA1     | L |
| 4035 | LRP1  | 7414   | VCL      | L |
| 4035 | LRP1  | 9270   | ITGB1BP1 | L |
| 4035 | LRP1  | 9479   | MAPK8IP1 | L |
| 4035 | LRP1  | 9567   | GTPBP1   | L |
| 4035 | LRP1  | 9784   | SNX17    | L |
| 4035 | LRP1  | 10524  | HTATIP   | L |
| 4035 | LRP1  | 10755  | GIPC1    | L |
| 4035 | LRP1  | 23542  | MAPK8IP2 | L |
| 4036 | LRP2  | 4043   | LRPAP1   | L |
| 4036 | LRP2  | 4192   | MDK      | L |
| 4036 | LRP2  | 5054   | SERPINE1 | L |
| 4036 | LRP2  | 5328   | PLAU     | L |
| 4036 | LRP2  | 5947   | RBP1     | L |
| 4036 | LRP2  | 6550   | SLC9A3   | L |
| 4036 | LRP2  | 7038   | TG       | L |
| 4036 | LRP2  | 7094   | TLN1     | L |
| 4036 | LRP2  | 7276   | TTR      | L |
| 4036 | LRP2  | 7356   | SCGB1A1  | L |
| 4036 | LRP2  | 8029   | CUBN     | L |
| 4036 | LRP2  | 9223   | MAGI1    | L |
| 4036 | LRP2  | 9270   | ITGB1BP1 | L |
| 4036 | LRP2  | 9479   | MAPK8IP1 | L |
| 4036 | LRP2  | 9737   | GPRASP1  | L |
| 4036 | LRP2  | 10755  | GIPC1    | L |
| 4036 | LRP2  | 23396  | PIP5K1C  | L |
| 4036 | LRP2  | 23542  | MAPK8IP2 | L |
| 4036 | LRP2  | 26119  | LDLRAP1  | L |
| 4036 | LRP2  | 55805  | LRP2BP   | L |
| 4036 | LRP2  | 56899  | EB-1     | L |

|      |        |       |          |   |
|------|--------|-------|----------|---|
| 4037 | LRP3   | 23062 | GGA2     | L |
| 4037 | LRP3   | 26088 | GGA1     | L |
| 4038 | LRP4   | 25861 | DFNB31   | L |
| 4040 | LRP6   | 22943 | DKK1     | L |
| 4040 | LRP6   | 27123 | DKK2     | L |
| 4041 | LRP5   | 4093  | SMAD9    | L |
| 4041 | LRP5   | 7057  | THBS1    | L |
| 4041 | LRP5   | 8312  | AXIN1    | L |
| 4041 | LRP5   | 22943 | DKK1     | L |
| 4043 | LRPAP1 | 5496  | PPM1G    | S |
| 4043 | LRPAP1 | 5829  | PXN      | L |
| 4043 | LRPAP1 | 6272  | SORT1    | L |
| 4043 | LRPAP1 | 6653  | SORL1    | L |
| 4043 | LRPAP1 | 7094  | TLN1     | L |
| 4043 | LRPAP1 | 7414  | VCL      | L |
| 4043 | LRPAP1 | 7436  | VLDLR    | L |
| 4043 | LRPAP1 | 7804  | LRP8     | L |
| 4043 | LRPAP1 | 23649 | POLA2    | S |
| 4043 | LRPAP1 | 57142 | RTN4     | S |
| 4048 | LTA4H  | 10094 | ARPC3    | S |
| 4048 | LTA4H  | 80021 | TMEM62   | S |
| 4049 | LTA    | 4050  | LTB      | L |
| 4049 | LTA    | 4055  | LTBR     | L |
| 4049 | LTA    | 7132  | TNFRSF1A | L |
| 4049 | LTA    | 7133  | TNFRSF1B | L |
| 4049 | LTA    | 8764  | TNFRSF14 | L |
| 4050 | LTB    | 4055  | LTBR     | L |
| 4050 | LTB    | 7132  | TNFRSF1A | L |
| 4054 | LTBP3  | 7040  | TGFB1    | L |
| 4054 | LTBP3  | 7042  | TGFB2    | L |
| 4054 | LTBP3  | 7043  | TGFB3    | L |
| 4054 | LTBP3  | 55660 | FNBP3    | L |
| 4055 | LTBR   | 7186  | TRAF2    | L |
| 4055 | LTBR   | 7187  | TRAF3    | L |
| 4055 | LTBR   | 7188  | TRAF5    | L |
| 4055 | LTBR   | 8740  | TNFSF14  | L |
| 4055 | LTBR   | 9618  | TRAF4    | L |
| 4055 | LTBR   | 56616 | DIABLO   | L |
| 4057 | LTF    | 4069  | LYZ      | L |
| 4057 | LTF    | 4589  | MUC7     | L |
| 4058 | LTK    | 5287  | PIK3C2B  | L |
| 4058 | LTK    | 5770  | PTPN1    | L |
| 4058 | LTK    | 6464  | SHC1     | L |
| 4060 | LUM    | 4323  | MMP14    | L |
| 4060 | LUM    | 6434  | SFRS10   | S |
| 4061 | LY6E   | 56005 | C19orf10 | L |
| 4062 | LY6H   | 84988 | PPP1R16A | S |
| 4063 | LY9    | 4068  | SH2D1A   | L |
| 4064 | CD180  | 9450  | LY86     | L |
| 4066 | LYL1   | 4790  | NFKB1    | L |
| 4066 | LYL1   | 6929  | TCF3     | L |
| 4067 | LYN    | 4311  | MME      | L |
| 4067 | LYN    | 4836  | NMT1     | L |
| 4067 | LYN    | 4868  | NPHS1    | L |
| 4067 | LYN    | 5141  | PDE4A    | L |
| 4067 | LYN    | 5175  | PECAM1   | L |
| 4067 | LYN    | 5294  | PIK3CG   | L |
| 4067 | LYN    | 5335  | PLCG1    | L |
| 4067 | LYN    | 5511  | PPP1R8   | L |
| 4067 | LYN    | 5588  | PRKCQ    | L |
| 4067 | LYN    | 5591  | PRKDC    | L |
| 4067 | LYN    | 5595  | MAPK3    | L |
| 4067 | LYN    | 5777  | PTPN6    | L |
| 4067 | LYN    | 6464  | SHC1     | L |
| 4067 | LYN    | 6850  | SYK      | L |
| 4067 | LYN    | 7297  | TYK2     | L |
| 4067 | LYN    | 7314  | UBB      | L |

|      |        |        |          |    |
|------|--------|--------|----------|----|
| 4067 | LYN    | 8631   | SCAP1    | L  |
| 4067 | LYN    | 8935   | SCAP2    | L  |
| 4067 | LYN    | 9094   | UNC119   | L  |
| 4067 | LYN    | 9322   | TRIP10   | L  |
| 4067 | LYN    | 9564   | BCAR1    | L  |
| 4067 | LYN    | 9846   | GAB2     | L  |
| 4067 | LYN    | 23624  | CBLC     | L  |
| 4067 | LYN    | 23645  | PPP1R15A | L  |
| 4067 | LYN    | 51206  | GP6      | L  |
| 4067 | LYN    | 51466  | EVL      | L  |
| 4067 | LYN    | 55024  | BANK1    | L  |
| 4067 | LYN    | 55824  | PAG1     | L  |
| 4067 | LYN    | 59341  | TRPV4    | L  |
| 4067 | LYN    | 84106  | PRAM1    | L  |
| 4067 | LYN    | 139716 | GAB3     | L  |
| 4068 | SH2D1A | 6504   | SLAMF1   | L  |
| 4068 | SH2D1A | 8832   | CD84     | L  |
| 4068 | SH2D1A | 51744  | CD244    | L  |
| 4068 | SH2D1A | 57823  | SLAMF7   | L  |
| 4068 | SH2D1A | 114836 | SLAMF6   | L  |
| 4071 | TM4SF1 | 22142  | (null)   | S  |
| 4074 | M6PR   | 5972   | REN      | L  |
| 4074 | M6PR   | 23163  | GGA3     | L  |
| 4074 | M6PR   | 26088  | GGA1     | L  |
| 4074 | M6PR   | 63971  | KIF13A   | L  |
| 4076 | M11S1  | 5829   | PXN      | L  |
| 4077 | NBR1   | 9638   | FEZ1     | L  |
| 4077 | NBR1   | 10519  | CIB1     | L  |
| 4077 | NBR1   | 51534  | C6orf55  | R  |
| 4082 | MARCKS | 10140  | TOB1     | L  |
| 4084 | MXD1   | 4149   | MAX      | L  |
| 4084 | MXD1   | 4609   | MYC      | L  |
| 4084 | MXD1   | 4610   | MYCL1    | L  |
| 4084 | MXD1   | 4613   | MYCN     | L  |
| 4084 | MXD1   | 5371   | PML      | L  |
| 4084 | MXD1   | 8819   | SAP30    | L  |
| 4084 | MXD1   | 9126   | CSPG6    | L  |
| 4084 | MXD1   | 23309  | SIN3B    | L  |
| 4084 | MXD1   | 84106  | PRAM1    | L  |
| 4085 | MAD2L1 | 4153   | MBL2     | L  |
| 4085 | MAD2L1 | 5980   | REV3L    | L  |
| 4085 | MAD2L1 | 6868   | ADAM17   | L  |
| 4085 | MAD2L1 | 8379   | MAD1L1   | RL |
| 4085 | MAD2L1 | 8881   | CDC16    | L  |
| 4085 | MAD2L1 | 9587   | MAD2L1BP | L  |
| 4085 | MAD2L1 | 10403  | KNTC2    | L  |
| 4085 | MAD2L1 | 10537  | UBD      | L  |
| 4085 | MAD2L1 | 81628  | TSC22D4  | R  |
| 4086 | SMAD1  | 4089   | SMAD4    | L  |
| 4086 | SMAD1  | 4090   | SMAD5    | L  |
| 4086 | SMAD1  | 4091   | SMAD6    | L  |
| 4086 | SMAD1  | 4152   | MBD1     | L  |
| 4086 | SMAD1  | 4734   | NEDD4    | L  |
| 4086 | SMAD1  | 4739   | NEDD9    | L  |
| 4086 | SMAD1  | 4762   | NEUROG1  | L  |
| 4086 | SMAD1  | 4853   | NOTCH2   | L  |
| 4086 | SMAD1  | 5692   | PSMB4    | L  |
| 4086 | SMAD1  | 5707   | PSMD1    | L  |
| 4086 | SMAD1  | 5717   | PSMD11   | L  |
| 4086 | SMAD1  | 6498   | SKIL     | L  |
| 4086 | SMAD1  | 6605   | SMARCE1  | L  |
| 4086 | SMAD1  | 6625   | SNRP70   | L  |
| 4086 | SMAD1  | 6660   | SOX5     | L  |
| 4086 | SMAD1  | 6942   | TCF20    | L  |
| 4086 | SMAD1  | 7508   | XPC      | L  |
| 4086 | SMAD1  | 7514   | XPO1     | L  |
| 4086 | SMAD1  | 7554   | ZNF8     | L  |



|      |       |        |         |   |
|------|-------|--------|---------|---|
| 4086 | SMAD1 | 7629   | ZNF76   | L |
| 4086 | SMAD1 | 8085   | MLL2    | L |
| 4086 | SMAD1 | 8458   | TTF2    | L |
| 4086 | SMAD1 | 8554   | PIAS1   | L |
| 4086 | SMAD1 | 9091   | PIGQ    | L |
| 4086 | SMAD1 | 9698   | PUM1    | L |
| 4086 | SMAD1 | 9839   | ZFH1B   | L |
| 4086 | SMAD1 | 10140  | TOB1    | L |
| 4086 | SMAD1 | 10691  | GMEB1   | L |
| 4086 | SMAD1 | 22858  | ICK     | L |
| 4086 | SMAD1 | 22869  | ZNF510  | L |
| 4086 | SMAD1 | 23090  | ZNF423  | L |
| 4086 | SMAD1 | 23269  | MGA     | L |
| 4086 | SMAD1 | 23592  | LEMD3   | L |
| 4086 | SMAD1 | 26959  | HBP1    | L |
| 4086 | SMAD1 | 28996  | HIPK2   | L |
| 4086 | SMAD1 | 29068  | BTBD15  | L |
| 4086 | SMAD1 | 51176  | LEF1    | L |
| 4086 | SMAD1 | 51304  | ZDHC3   | L |
| 4086 | SMAD1 | 51588  | PIAS4   | L |
| 4086 | SMAD1 | 51652  | VPS24   | L |
| 4086 | SMAD1 | 55914  | ERBB2IP | L |
| 4086 | SMAD1 | 57154  | SMURF1  | L |
| 4086 | SMAD1 | 57473  | GM632   | L |
| 4086 | SMAD1 | 57496  | MKL2    | L |
| 4086 | SMAD1 | 64750  | SMURF2  | L |
| 4086 | SMAD1 | 79753  | SNIP1   | L |
| 4086 | SMAD1 | 84079  | ANKRD27 | L |
| 4086 | SMAD1 | 90627  | STARD13 | L |
| 4086 | SMAD1 | 90987  | ZNF251  | L |
| 4086 | SMAD1 | 157922 | CAMSAP1 | L |
| 4086 | SMAD1 | 201516 | ZSCAN4  | L |
| 4086 | SMAD1 | 392255 | GDF6    | L |
| 4087 | SMAD2 | 4088   | SMAD3   | L |
| 4087 | SMAD2 | 4089   | SMAD4   | L |
| 4087 | SMAD2 | 4093   | SMAD9   | L |
| 4087 | SMAD2 | 4205   | MEF2A   | L |
| 4087 | SMAD2 | 4208   | MEF2C   | L |
| 4087 | SMAD2 | 4301   | MLLT4   | L |
| 4087 | SMAD2 | 4609   | MYC     | L |
| 4087 | SMAD2 | 4802   | NFYC    | L |
| 4087 | SMAD2 | 5069   | PAPPA   | L |
| 4087 | SMAD2 | 5371   | PML     | L |
| 4087 | SMAD2 | 5518   | PPP2R1A | L |
| 4087 | SMAD2 | 5573   | PRKAR1A | L |
| 4087 | SMAD2 | 5660   | PSAP    | L |
| 4087 | SMAD2 | 5678   | PSG9    | L |
| 4087 | SMAD2 | 5714   | PSMD8   | L |
| 4087 | SMAD2 | 5717   | PSMD11  | L |
| 4087 | SMAD2 | 5824   | PEX19   | L |
| 4087 | SMAD2 | 5915   | RARB    | L |
| 4087 | SMAD2 | 5933   | RBL1    | L |
| 4087 | SMAD2 | 6093   | ROCK1   | L |
| 4087 | SMAD2 | 6208   | RPS14   | L |
| 4087 | SMAD2 | 6233   | RPS27A  | L |
| 4087 | SMAD2 | 6256   | RXRA    | L |
| 4087 | SMAD2 | 6497   | SKI     | L |
| 4087 | SMAD2 | 6498   | SKIL    | L |
| 4087 | SMAD2 | 6625   | SNRP70  | L |
| 4087 | SMAD2 | 6667   | SP1     | L |
| 4087 | SMAD2 | 6717   | SRI     | L |
| 4087 | SMAD2 | 6764   | ST5     | L |
| 4087 | SMAD2 | 6767   | ST13    | L |
| 4087 | SMAD2 | 6935   | TCF8    | L |
| 4087 | SMAD2 | 7046   | TGFBR1  | L |
| 4087 | SMAD2 | 7050   | TGIF    | L |
| 4087 | SMAD2 | 7052   | TGM2    | L |

|      |       |        |          |   |
|------|-------|--------|----------|---|
| 4087 | SMAD2 | 7266   | DNAJC7   | L |
| 4087 | SMAD2 | 7311   | UBA52    | L |
| 4087 | SMAD2 | 7554   | ZNF8     | L |
| 4087 | SMAD2 | 7592   | ZNF41    | L |
| 4087 | SMAD2 | 8021   | NUP214   | L |
| 4087 | SMAD2 | 8065   | CUL5     | L |
| 4087 | SMAD2 | 8312   | AXIN1    | L |
| 4087 | SMAD2 | 8881   | CDC16    | L |
| 4087 | SMAD2 | 8928   | FOXH1    | L |
| 4087 | SMAD2 | 9372   | ZFYVE9   | L |
| 4087 | SMAD2 | 9392   | TGFBRAP1 | L |
| 4087 | SMAD2 | 9516   | LITAF    | L |
| 4087 | SMAD2 | 9839   | ZFHX1B   | L |
| 4087 | SMAD2 | 9972   | NUP153   | L |
| 4087 | SMAD2 | 10048  | RANBP9   | L |
| 4087 | SMAD2 | 10140  | TOB1     | L |
| 4087 | SMAD2 | 10226  | M6PRBP1  | L |
| 4087 | SMAD2 | 10274  | STAG1    | L |
| 4087 | SMAD2 | 10393  | ANAPC10  | L |
| 4087 | SMAD2 | 10401  | PIAS3    | L |
| 4087 | SMAD2 | 10657  | KHDRBS1  | L |
| 4087 | SMAD2 | 10771  | ZMYND11  | L |
| 4087 | SMAD2 | 10914  | PAPOLA   | L |
| 4087 | SMAD2 | 10956  | OS9      | L |
| 4087 | SMAD2 | 10987  | COPS5    | L |
| 4087 | SMAD2 | 11171  | STRAP    | L |
| 4087 | SMAD2 | 11177  | BAZ1A    | L |
| 4087 | SMAD2 | 22938  | SNW1     | L |
| 4087 | SMAD2 | 22976  | PAXIP1   | L |
| 4087 | SMAD2 | 23054  | NCOA6    | L |
| 4087 | SMAD2 | 23325  | KIAA1033 | L |
| 4087 | SMAD2 | 23557  | SNAPAP   | L |
| 4087 | SMAD2 | 26953  | RANBP6   | L |
| 4087 | SMAD2 | 28996  | HIPK2    | L |
| 4087 | SMAD2 | 29882  | ANAPC2   | L |
| 4087 | SMAD2 | 51176  | LEF1     | L |
| 4087 | SMAD2 | 51366  | EDD1     | L |
| 4087 | SMAD2 | 51386  | EIF3S6IP | L |
| 4087 | SMAD2 | 54165  | DCUN1D1  | L |
| 4087 | SMAD2 | 54680  | C1orf181 | L |
| 4087 | SMAD2 | 55223  | TRIM62   | L |
| 4087 | SMAD2 | 55577  | NAGK     | L |
| 4087 | SMAD2 | 55599  | RNPC3    | L |
| 4087 | SMAD2 | 55643  | BTBD2    | L |
| 4087 | SMAD2 | 55914  | ERBB2IP  | L |
| 4087 | SMAD2 | 56288  | PARD3    | L |
| 4087 | SMAD2 | 57154  | SMURF1   | L |
| 4087 | SMAD2 | 57459  | GATAD2B  | L |
| 4087 | SMAD2 | 63891  | RNF123   | L |
| 4087 | SMAD2 | 64750  | SMURF2   | L |
| 4087 | SMAD2 | 79640  | FLJ23584 | L |
| 4087 | SMAD2 | 79753  | SNIP1    | L |
| 4087 | SMAD2 | 80325  | ABTB1    | L |
| 4087 | SMAD2 | 81704  | DOCK8    | L |
| 4087 | SMAD2 | 118429 | ANTXR2   | L |
| 4087 | SMAD2 | 145483 | C14orf44 | L |
| 4088 | SMAD3 | 4089   | SMAD4    | L |
| 4088 | SMAD3 | 4149   | MAX      | L |
| 4088 | SMAD3 | 4152   | MBD1     | L |
| 4088 | SMAD3 | 4194   | MDM4     | L |
| 4088 | SMAD3 | 4221   | MEN1     | L |
| 4088 | SMAD3 | 4303   | MLLT7    | L |
| 4088 | SMAD3 | 4609   | MYC      | L |
| 4088 | SMAD3 | 4739   | NEDD9    | L |
| 4088 | SMAD3 | 4802   | NFYC     | L |
| 4088 | SMAD3 | 4851   | NOTCH1   | L |
| 4088 | SMAD3 | 5069   | PAPPA    | L |

|      |       |        |            |   |
|------|-------|--------|------------|---|
| 4088 | SMAD3 | 5097   | PCDH1      | L |
| 4088 | SMAD3 | 5190   | PEX6       | L |
| 4088 | SMAD3 | 5324   | PLAG1      | L |
| 4088 | SMAD3 | 5325   | PLAGL1     | L |
| 4088 | SMAD3 | 5371   | PML        | L |
| 4088 | SMAD3 | 5518   | PPP2R1A    | L |
| 4088 | SMAD3 | 5599   | MAPK8      | L |
| 4088 | SMAD3 | 5717   | PSMD11     | L |
| 4088 | SMAD3 | 5933   | RBL1       | L |
| 4088 | SMAD3 | 6175   | RPLP0      | L |
| 4088 | SMAD3 | 6497   | SKI        | L |
| 4088 | SMAD3 | 6498   | SKIL       | L |
| 4088 | SMAD3 | 6625   | SNRP70     | L |
| 4088 | SMAD3 | 6935   | TCF8       | L |
| 4088 | SMAD3 | 7030   | TFE3       | L |
| 4088 | SMAD3 | 7052   | TGM2       | L |
| 4088 | SMAD3 | 7421   | VDR        | L |
| 4088 | SMAD3 | 7554   | ZNF8       | L |
| 4088 | SMAD3 | 7704   | ZBTB16     | L |
| 4088 | SMAD3 | 7750   | ZNF198     | L |
| 4088 | SMAD3 | 8021   | NUP214     | L |
| 4088 | SMAD3 | 8312   | AXIN1      | L |
| 4088 | SMAD3 | 8881   | CDC16      | L |
| 4088 | SMAD3 | 8888   | MCM3AP     | L |
| 4088 | SMAD3 | 8928   | FOXH1      | L |
| 4088 | SMAD3 | 9372   | ZFYVE9     | L |
| 4088 | SMAD3 | 9728   | KIAA0256   | L |
| 4088 | SMAD3 | 9757   | MLL4       | L |
| 4088 | SMAD3 | 9839   | ZFHX1B     | L |
| 4088 | SMAD3 | 10048  | RANBP9     | L |
| 4088 | SMAD3 | 10140  | TOB1       | L |
| 4088 | SMAD3 | 10148  | EBI3       | L |
| 4088 | SMAD3 | 10393  | ANAPC10    | L |
| 4088 | SMAD3 | 10401  | PIAS3      | L |
| 4088 | SMAD3 | 10428  | CFDP1      | L |
| 4088 | SMAD3 | 10610  | ST6GALNAC2 | L |
| 4088 | SMAD3 | 10691  | GMEB1      | L |
| 4088 | SMAD3 | 11018  | TMED1      | L |
| 4088 | SMAD3 | 11108  | PRDM4      | L |
| 4088 | SMAD3 | 11171  | STRAP      | L |
| 4088 | SMAD3 | 22823  | MTF2       | L |
| 4088 | SMAD3 | 22938  | SNW1       | L |
| 4088 | SMAD3 | 22992  | FBXL11     | L |
| 4088 | SMAD3 | 23054  | NCOA6      | L |
| 4088 | SMAD3 | 23462  | HEY1       | L |
| 4088 | SMAD3 | 26088  | GGA1       | L |
| 4088 | SMAD3 | 26508  | HEYL       | L |
| 4088 | SMAD3 | 51176  | LEF1       | L |
| 4088 | SMAD3 | 51523  | CXXC5      | L |
| 4088 | SMAD3 | 54778  | RNF111     | L |
| 4088 | SMAD3 | 55769  | ZNF83      | L |
| 4088 | SMAD3 | 55914  | ERBB2IP    | L |
| 4088 | SMAD3 | 56478  | EIF4ENIF1  | L |
| 4088 | SMAD3 | 57154  | SMURF1     | L |
| 4088 | SMAD3 | 57648  | KIAA1522   | L |
| 4088 | SMAD3 | 60436  | TGIF2      | L |
| 4088 | SMAD3 | 64115  | C10orf54   | L |
| 4088 | SMAD3 | 64750  | SMURF2     | L |
| 4088 | SMAD3 | 79595  | SAP130     | L |
| 4088 | SMAD3 | 79673  | ZNF329     | L |
| 4088 | SMAD3 | 79987  | SVEP1      | L |
| 4088 | SMAD3 | 284058 | LOC284058  | L |
| 4089 | SMAD4 | 4090   | SMAD5      | L |
| 4089 | SMAD4 | 4093   | SMAD9      | R |
| 4089 | SMAD4 | 4149   | MAX        | L |
| 4089 | SMAD4 | 4205   | MEF2A      | L |
| 4089 | SMAD4 | 4303   | MLLT7      | L |

|      |       |        |          |    |
|------|-------|--------|----------|----|
| 4089 | SMAD4 | 4435   | CITED1   | L  |
| 4089 | SMAD4 | 4654   | MYOD1    | L  |
| 4089 | SMAD4 | 5603   | MAPK13   | L  |
| 4089 | SMAD4 | 5670   | PSG2     | L  |
| 4089 | SMAD4 | 5678   | PSG9     | L  |
| 4089 | SMAD4 | 5717   | PSMD11   | L  |
| 4089 | SMAD4 | 5898   | RALA     | L  |
| 4089 | SMAD4 | 5933   | RBL1     | L  |
| 4089 | SMAD4 | 6158   | RPL28    | L  |
| 4089 | SMAD4 | 6497   | SKI      | L  |
| 4089 | SMAD4 | 6498   | SKIL     | L  |
| 4089 | SMAD4 | 6625   | SNRP70   | L  |
| 4089 | SMAD4 | 6667   | SP1      | L  |
| 4089 | SMAD4 | 6988   | TCTA     | L  |
| 4089 | SMAD4 | 7030   | TFE3     | L  |
| 4089 | SMAD4 | 7329   | UBE2I    | RL |
| 4089 | SMAD4 | 7332   | UBE2L3   | L  |
| 4089 | SMAD4 | 7554   | ZNF8     | L  |
| 4089 | SMAD4 | 7750   | ZNF198   | L  |
| 4089 | SMAD4 | 8554   | PIAS1    | L  |
| 4089 | SMAD4 | 8945   | BTRC     | L  |
| 4089 | SMAD4 | 9375   | TM9SF2   | L  |
| 4089 | SMAD4 | 9392   | TGFBRAP1 | L  |
| 4089 | SMAD4 | 10140  | TOB1     | L  |
| 4089 | SMAD4 | 10256  | CNKSRI   | L  |
| 4089 | SMAD4 | 10272  | FSTL3    | L  |
| 4089 | SMAD4 | 10363  | HMG20A   | L  |
| 4089 | SMAD4 | 10401  | PIAS3    | L  |
| 4089 | SMAD4 | 10457  | GPNMB    | L  |
| 4089 | SMAD4 | 10987  | COPS5    | L  |
| 4089 | SMAD4 | 23090  | ZNF423   | L  |
| 4089 | SMAD4 | 51176  | LEF1     | L  |
| 4089 | SMAD4 | 51497  | TH1L     | L  |
| 4089 | SMAD4 | 55660  | FNBP3    | L  |
| 4089 | SMAD4 | 55714  | ODZ3     | L  |
| 4089 | SMAD4 | 55802  | DCP1A    | L  |
| 4089 | SMAD4 | 55914  | ERBB2IP  | L  |
| 4089 | SMAD4 | 57510  | XPO5     | L  |
| 4089 | SMAD4 | 58486  | LOC58486 | L  |
| 4089 | SMAD4 | 60676  | PAPPA2   | L  |
| 4089 | SMAD4 | 64777  | FLJ22318 | L  |
| 4089 | SMAD4 | 79650  | FLJ13154 | L  |
| 4089 | SMAD4 | 79753  | SNIP1    | L  |
| 4089 | SMAD4 | 114790 | STK11IP  | L  |
| 4089 | SMAD4 | 115426 | UHRF2    | L  |
| 4089 | SMAD4 | 196513 | DCP1B    | L  |
| 4090 | SMAD5 | 4152   | MBD1     | L  |
| 4090 | SMAD5 | 4734   | NEDD4    | L  |
| 4090 | SMAD5 | 5717   | PSMD11   | L  |
| 4090 | SMAD5 | 5782   | PTPN12   | L  |
| 4090 | SMAD5 | 5936   | RBM4     | L  |
| 4090 | SMAD5 | 6262   | RYR2     | L  |
| 4090 | SMAD5 | 6421   | SFPQ     | L  |
| 4090 | SMAD5 | 6625   | SNRP70   | L  |
| 4090 | SMAD5 | 6626   | SNRPA    | L  |
| 4090 | SMAD5 | 6660   | SOX5     | L  |
| 4090 | SMAD5 | 7554   | ZNF8     | L  |
| 4090 | SMAD5 | 9839   | ZFHX1B   | L  |
| 4090 | SMAD5 | 10140  | TOB1     | L  |
| 4090 | SMAD5 | 11059  | WWP1     | L  |
| 4090 | SMAD5 | 11284  | PNKP     | L  |
| 4090 | SMAD5 | 11338  | U2AF2    | L  |
| 4090 | SMAD5 | 51523  | CXXC5    | L  |
| 4090 | SMAD5 | 51652  | VPS24    | L  |
| 4090 | SMAD5 | 54893  | MTMR10   | L  |
| 4090 | SMAD5 | 57154  | SMURF1   | L  |
| 4090 | SMAD5 | 64750  | SMURF2   | L  |

|      |       |        |           |   |
|------|-------|--------|-----------|---|
| 4090 | SMAD5 | 83595  | SOX7      | L |
| 4090 | SMAD5 | 85313  | PPIL4     | L |
| 4090 | SMAD5 | 392255 | GDF6      | L |
| 4091 | SMAD6 | 4092   | SMAD7     | L |
| 4091 | SMAD6 | 6885   | MAP3K7    | L |
| 4091 | SMAD6 | 10454  | MAP3K7IP1 | L |
| 4091 | SMAD6 | 10617  | STAMPB    | L |
| 4091 | SMAD6 | 11171  | STRAP     | L |
| 4091 | SMAD6 | 54778  | RNF111    | L |
| 4091 | SMAD6 | 57154  | SMURF1    | L |
| 4091 | SMAD6 | 64750  | SMURF2    | L |
| 4092 | SMAD7 | 4152   | MBD1      | L |
| 4092 | SMAD7 | 4654   | MYOD1     | L |
| 4092 | SMAD7 | 5606   | MAP2K3    | L |
| 4092 | SMAD7 | 5608   | MAP2K6    | L |
| 4092 | SMAD7 | 6660   | SOX5      | L |
| 4092 | SMAD7 | 6885   | MAP3K7    | L |
| 4092 | SMAD7 | 7046   | TGFBR1    | L |
| 4092 | SMAD7 | 7048   | TGFBR2    | L |
| 4092 | SMAD7 | 8458   | TTF2      | L |
| 4092 | SMAD7 | 8554   | PIAS1     | L |
| 4092 | SMAD7 | 9580   | SOX13     | L |
| 4092 | SMAD7 | 10413  | YAP1      | L |
| 4092 | SMAD7 | 10454  | MAP3K7IP1 | L |
| 4092 | SMAD7 | 10617  | STAMPB    | L |
| 4092 | SMAD7 | 11171  | STRAP     | L |
| 4092 | SMAD7 | 22992  | FBXL11    | L |
| 4092 | SMAD7 | 26508  | HEYL      | L |
| 4092 | SMAD7 | 27107  | ZBTB11    | L |
| 4092 | SMAD7 | 29068  | BTBD15    | L |
| 4092 | SMAD7 | 51427  | ZNF588    | L |
| 4092 | SMAD7 | 51523  | CXXC5     | L |
| 4092 | SMAD7 | 51588  | PIAS4     | L |
| 4092 | SMAD7 | 54778  | RNF111    | L |
| 4092 | SMAD7 | 55870  | ASH1L     | L |
| 4092 | SMAD7 | 55914  | ERBB2IP   | L |
| 4092 | SMAD7 | 56288  | PARD3     | L |
| 4092 | SMAD7 | 57154  | SMURF1    | L |
| 4092 | SMAD7 | 57496  | MKL2      | L |
| 4092 | SMAD7 | 64750  | SMURF2    | L |
| 4092 | SMAD7 | 83595  | SOX7      | L |
| 4093 | SMAD9 | 4125   | MAN2B1    | L |
| 4093 | SMAD9 | 4152   | MBD1      | L |
| 4093 | SMAD9 | 4245   | MGAT1     | L |
| 4093 | SMAD9 | 4299   | AFF1      | L |
| 4093 | SMAD9 | 5069   | PAPPA     | L |
| 4093 | SMAD9 | 5256   | PHKA2     | L |
| 4093 | SMAD9 | 5318   | PKP2      | L |
| 4093 | SMAD9 | 5339   | PLEC1     | L |
| 4093 | SMAD9 | 5467   | PPARD     | L |
| 4093 | SMAD9 | 5529   | PPP2R5E   | L |
| 4093 | SMAD9 | 5660   | PSAP      | L |
| 4093 | SMAD9 | 5714   | PSMD8     | L |
| 4093 | SMAD9 | 5859   | QARS      | L |
| 4093 | SMAD9 | 6238   | RRBP1     | L |
| 4093 | SMAD9 | 6625   | SNRP70    | L |
| 4093 | SMAD9 | 6711   | SPTBN1    | L |
| 4093 | SMAD9 | 6904   | TBCD      | L |
| 4093 | SMAD9 | 7013   | TERF1     | L |
| 4093 | SMAD9 | 7266   | DNAJC7    | L |
| 4093 | SMAD9 | 7337   | UBE3A     | L |
| 4093 | SMAD9 | 7403   | UTX       | L |
| 4093 | SMAD9 | 8085   | MLL2      | L |
| 4093 | SMAD9 | 8543   | LMO4      | L |
| 4093 | SMAD9 | 8544   | PIR       | L |
| 4093 | SMAD9 | 8663   | EIF3S8    | L |
| 4093 | SMAD9 | 8665   | EIF3S5    | L |

|      |       |        |          |   |
|------|-------|--------|----------|---|
| 4093 | SMAD9 | 8761   | PABPC4   | L |
| 4093 | SMAD9 | 8888   | MCM3AP   | L |
| 4093 | SMAD9 | 9070   | ASH2L    | L |
| 4093 | SMAD9 | 9093   | DNAJA3   | L |
| 4093 | SMAD9 | 9320   | TRIP12   | L |
| 4093 | SMAD9 | 9640   | ZNF592   | L |
| 4093 | SMAD9 | 9646   | SH2BP1   | L |
| 4093 | SMAD9 | 9652   | KIAA0372 | L |
| 4093 | SMAD9 | 9662   | CEP4     | L |
| 4093 | SMAD9 | 9839   | ZFHX1B   | L |
| 4093 | SMAD9 | 10048  | RANBP9   | L |
| 4093 | SMAD9 | 10274  | STAG1    | L |
| 4093 | SMAD9 | 10903  | MTMR11   | L |
| 4093 | SMAD9 | 10905  | MAN1A2   | L |
| 4093 | SMAD9 | 10971  | YWHAQ    | L |
| 4093 | SMAD9 | 11034  | DSTN     | L |
| 4093 | SMAD9 | 11177  | BAZ1A    | L |
| 4093 | SMAD9 | 22943  | DKK1     | L |
| 4093 | SMAD9 | 23049  | SMG1     | L |
| 4093 | SMAD9 | 23086  | EXPH5    | L |
| 4093 | SMAD9 | 23173  | METAP1   | L |
| 4093 | SMAD9 | 23355  | KIAA0804 | L |
| 4093 | SMAD9 | 23462  | HEY1     | L |
| 4093 | SMAD9 | 23592  | LEMD3    | L |
| 4093 | SMAD9 | 23650  | TRIM29   | L |
| 4093 | SMAD9 | 26508  | HEYL     | L |
| 4093 | SMAD9 | 27043  | PELP1    | L |
| 4093 | SMAD9 | 29979  | UBQLN1   | L |
| 4093 | SMAD9 | 51523  | CXXC5    | L |
| 4093 | SMAD9 | 51676  | ASB2     | L |
| 4093 | SMAD9 | 54893  | MTMR10   | L |
| 4093 | SMAD9 | 55219  | TMEM57   | L |
| 4093 | SMAD9 | 55236  | FLJ10808 | L |
| 4093 | SMAD9 | 55577  | NAGK     | L |
| 4093 | SMAD9 | 55611  | OTUB1    | L |
| 4093 | SMAD9 | 55769  | ZNF83    | L |
| 4093 | SMAD9 | 55898  | SMAP-1   | L |
| 4093 | SMAD9 | 56652  | PEO1     | L |
| 4093 | SMAD9 | 56893  | UBQLN4   | L |
| 4093 | SMAD9 | 57104  | PNPLA2   | L |
| 4093 | SMAD9 | 57134  | MAN1C1   | L |
| 4093 | SMAD9 | 57492  | ARID1B   | L |
| 4093 | SMAD9 | 63891  | RNF123   | L |
| 4093 | SMAD9 | 64129  | TINAGL1  | L |
| 4093 | SMAD9 | 64333  | ARHGAP9  | L |
| 4093 | SMAD9 | 64374  | SIL1     | L |
| 4093 | SMAD9 | 64795  | FLJ13910 | L |
| 4093 | SMAD9 | 79048  | SECISBP2 | L |
| 4093 | SMAD9 | 79230  | ZNF557   | L |
| 4093 | SMAD9 | 79586  | CHPF     | L |
| 4093 | SMAD9 | 79987  | SVEP1    | L |
| 4093 | SMAD9 | 80124  | VCPIP1   | L |
| 4093 | SMAD9 | 80325  | ABTB1    | L |
| 4093 | SMAD9 | 81570  | CLPB     | L |
| 4093 | SMAD9 | 81624  | DIAPH3   | L |
| 4093 | SMAD9 | 84914  | ZNF587   | L |
| 4093 | SMAD9 | 132884 | EVC2     | L |
| 4093 | SMAD9 | 147664 | FLJ32214 | L |
| 4093 | SMAD9 | 157922 | CAMSAP1  | L |
| 4093 | SMAD9 | 201516 | ZSCAN4   | L |
| 4094 | MAF   | 4097   | MAFG     | L |
| 4094 | MAF   | 4602   | MYB      | L |
| 4094 | MAF   | 6662   | SOX9     | L |
| 4094 | MAF   | 7392   | USF2     | L |
| 4094 | MAF   | 9935   | MAFB     | L |
| 4097 | MAFG  | 4778   | NFE2     | L |
| 4097 | MAFG  | 4779   | NFE2L1   | L |

|      |         |        |               |   |
|------|---------|--------|---------------|---|
| 4097 | MAFG    | 4780   | NFE2L2        | L |
| 4097 | MAFG    | 5080   | PAX6          | L |
| 4097 | MAFG    | 5396   | PRRX1         | L |
| 4097 | MAFG    | 7431   | VIM           | S |
| 4097 | MAFG    | 7975   | MAFK          | L |
| 4097 | MAFG    | 9586   | CREB5         | L |
| 4097 | MAFG    | 9603   | NFE2L3        | L |
| 4097 | MAFG    | 11016  | ATF7          | L |
| 4097 | MAFG    | 51003  | MED31         | S |
| 4097 | MAFG    | 55509  | SNFT          | L |
| 4097 | MAFG    | 60468  | BACH2         | L |
| 4097 | MAFG    | 84060  | DKFZP564O0523 | S |
| 4099 | MAG     | 4131   | MAP1B         | L |
| 4099 | MAG     | 4155   | MBP           | L |
| 4099 | MAG     | 5354   | PLP1          | L |
| 4100 | MAGEA1  | 7381   | UQCRB         | R |
| 4100 | MAGEA1  | 11074  | TRIM31        | R |
| 4100 | MAGEA1  | 54471  | FLJ20232      | R |
| 4100 | MAGEA1  | 56904  | SH3GLB2       | R |
| 4103 | MAGEA4  | 5716   | PSMD10        | L |
| 4103 | MAGEA4  | 7381   | UQCRB         | R |
| 4103 | MAGEA4  | 140691 | RNF36         | R |
| 4103 | MAGEA4  | 150483 | MGC27019      | R |
| 4110 | MAGEA11 | 4291   | MLF1          | R |
| 4110 | MAGEA11 | 4715   | NDUFB9        | R |
| 4110 | MAGEA11 | 5264   | PHYH          | R |
| 4110 | MAGEA11 | 5987   | RFP           | R |
| 4110 | MAGEA11 | 6919   | TCEA2         | R |
| 4110 | MAGEA11 | 7704   | ZBTB16        | R |
| 4110 | MAGEA11 | 8644   | AKR1C3        | R |
| 4110 | MAGEA11 | 8715   | NOL4          | R |
| 4110 | MAGEA11 | 9167   | COX7A2L       | R |
| 4110 | MAGEA11 | 9411   | ARHGAP29      | R |
| 4110 | MAGEA11 | 9491   | PSMF1         | R |
| 4110 | MAGEA11 | 9589   | WTAP          | R |
| 4110 | MAGEA11 | 9729   | KIAA0408      | R |
| 4110 | MAGEA11 | 10445  | MCRS1         | R |
| 4110 | MAGEA11 | 10495  | COVA1         | R |
| 4110 | MAGEA11 | 10935  | PRDX3         | R |
| 4110 | MAGEA11 | 11284  | PNKP          | R |
| 4110 | MAGEA11 | 22980  | KIAA1049      | R |
| 4110 | MAGEA11 | 23059  | CLUAP1        | R |
| 4110 | MAGEA11 | 25953  | MR-1          | R |
| 4110 | MAGEA11 | 27042  | C1orf107      | R |
| 4110 | MAGEA11 | 29057  | TMEM29        | R |
| 4110 | MAGEA11 | 51082  | POLR1D        | R |
| 4110 | MAGEA11 | 51103  | NDUFAF1       | R |
| 4110 | MAGEA11 | 51375  | SNX7          | R |
| 4110 | MAGEA11 | 51534  | C6orf55       | R |
| 4110 | MAGEA11 | 51619  | UBE2D4        | R |
| 4110 | MAGEA11 | 54431  | DNAJC10       | R |
| 4110 | MAGEA11 | 55621  | TRMT1         | R |
| 4110 | MAGEA11 | 55698  | FLJ10324      | R |
| 4110 | MAGEA11 | 58529  | MYOZ1         | R |
| 4110 | MAGEA11 | 60491  | NIF3L1        | R |
| 4110 | MAGEA11 | 63898  | SH2D4A        | R |
| 4110 | MAGEA11 | 64770  | CCDC14        | R |
| 4110 | MAGEA11 | 78990  | OTUB2         | R |
| 4110 | MAGEA11 | 79027  | ZNF655        | R |
| 4110 | MAGEA11 | 79706  | PRKRIP1       | R |
| 4110 | MAGEA11 | 79959  | C18orf9       | R |
| 4110 | MAGEA11 | 80306  | MED28         | R |
| 4110 | MAGEA11 | 81565  | NDEL1         | R |
| 4110 | MAGEA11 | 83463  | MXD3          | R |
| 4110 | MAGEA11 | 84707  | BEX2          | R |
| 4110 | MAGEA11 | 84708  | LNX           | R |
| 4110 | MAGEA11 | 84767  | TRIM51        | R |

|      |         |        |           |   |
|------|---------|--------|-----------|---|
| 4110 | MAGEA11 | 92667  | C20orf72  | R |
| 4110 | MAGEA11 | 114908 | PORIMIN   | R |
| 4110 | MAGEA11 | 124460 | SLIC1     | R |
| 4110 | MAGEA11 | 130013 | ACMSD     | R |
| 4110 | MAGEA11 | 151112 | ZSWIM2    | R |
| 4110 | MAGEA11 | 162681 | C18orf54  | R |
| 4110 | MAGEA11 | 164127 | C1orf65   | R |
| 4110 | MAGEA11 | 170082 | MGC17403  | R |
| 4110 | MAGEA11 | 200523 | FLJ25369  | R |
| 4110 | MAGEA11 | 387338 | NSUN4     | R |
| 4111 | MAGEA12 | 6776   | STAT5A    | R |
| 4115 | MAGEB4  | 117246 | FSTSJ3    | R |
| 4116 | MAGOH   | 9939   | RBM8A     | L |
| 4116 | MAGOH   | 10482  | NXF1      | L |
| 4122 | MAN2A2  | 7431   | VIM       | S |
| 4122 | MAN2A2  | 8518   | IKBKAP    | S |
| 4122 | MAN2A2  | 28964  | GIT1      | S |
| 4122 | MAN2A2  | 51631  | LUC7L2    | S |
| 4123 | MAN2C1  | 7916   | BAT2      | L |
| 4130 | MAP1A   | 4131   | MAP1B     | L |
| 4130 | MAP1A   | 7280   | TUBB2     | L |
| 4130 | MAP1A   | 27185  | DISC1     | L |
| 4130 | MAP1A   | 84557  | MAP1LC3A  | L |
| 4131 | MAP1B   | 5599   | MAPK8     | L |
| 4131 | MAP1B   | 6622   | SNCA      | L |
| 4131 | MAP1B   | 8125   | ANP32A    | L |
| 4131 | MAP1B   | 8139   | GAN       | L |
| 4131 | MAP1B   | 8655   | DNCL1     | L |
| 4133 | MAP2    | 4647   | MYO7A     | L |
| 4133 | MAP2    | 5339   | PLEC1     | L |
| 4133 | MAP2    | 57787  | MARK4     | L |
| 4133 | MAP2    | 84630  | TTBK1     | L |
| 4134 | MAP4    | 5829   | PXN       | L |
| 4134 | MAP4    | 7094   | TLN1      | L |
| 4134 | MAP4    | 7280   | TUBB2     | L |
| 4134 | MAP4    | 57787  | MARK4     | L |
| 4137 | MAPT    | 5300   | PIN1      | L |
| 4137 | MAPT    | 5663   | PSEN1     | L |
| 4137 | MAPT    | 6285   | S100B     | L |
| 4137 | MAPT    | 6622   | SNCA      | L |
| 4137 | MAPT    | 6710   | SPTB      | L |
| 4137 | MAPT    | 6812   | STXBP1    | L |
| 4137 | MAPT    | 7280   | TUBB2     | L |
| 4137 | MAPT    | 7529   | YWHAB     | L |
| 4137 | MAPT    | 7534   | YWHAZ     | L |
| 4137 | MAPT    | 8287   | USP9Y     | L |
| 4137 | MAPT    | 8473   | OGT       | L |
| 4137 | MAPT    | 57787  | MARK4     | L |
| 4140 | MARK3   | 5588   | PRKCQ     | L |
| 4140 | MARK3   | 6919   | TCEA2     | S |
| 4140 | MARK3   | 7276   | TTR       | S |
| 4140 | MARK3   | 8655   | DNCL1     | L |
| 4140 | MARK3   | 9512   | PMPCB     | S |
| 4140 | MARK3   | 10898  | CPSF4     | S |
| 4140 | MARK3   | 25926  | NOL11     | S |
| 4140 | MARK3   | 55823  | VPS11     | S |
| 4140 | MARK3   | 56311  | ANKRD7    | S |
| 4140 | MARK3   | 57104  | PNPLA2    | S |
| 4140 | MARK3   | 79754  | ASB13     | S |
| 4140 | MARK3   | 113174 | LOC113174 | S |
| 4141 | MARS    | 5917   | RARS      | L |
| 4141 | MARS    | 7975   | MAFK      | L |
| 4141 | MARS    | 9647   | PPM1F     | S |
| 4141 | MARS    | 11100  | HNRPUL1   | S |
| 4144 | MAT2A   | 27430  | MAT2B     | L |
| 4145 | MATK    | 4914   | NTRK1     | L |
| 4145 | MATK    | 5829   | PXN       | L |



|      |       |       |          |    |
|------|-------|-------|----------|----|
| 4145 | MATK  | 6714  | SRC      | L  |
| 4146 | MATN1 | 4147  | MATN2    | L  |
| 4146 | MATN1 | 4148  | MATN3    | L  |
| 4146 | MATN1 | 8785  | MATN4    | L  |
| 4147 | MATN2 | 8785  | MATN4    | L  |
| 4148 | MATN3 | 8785  | MATN4    | L  |
| 4149 | MAX   | 4335  | MNT      | L  |
| 4149 | MAX   | 4436  | MSH2     | L  |
| 4149 | MAX   | 4601  | MXI1     | RL |
| 4149 | MAX   | 4609  | MYC      | L  |
| 4149 | MAX   | 4610  | MYCL1    | L  |
| 4149 | MAX   | 4613  | MYCN     | L  |
| 4149 | MAX   | 7003  | TEAD1    | L  |
| 4149 | MAX   | 8295  | TRRAP    | L  |
| 4149 | MAX   | 9043  | SPAG9    | L  |
| 4149 | MAX   | 10608 | MXD4     | L  |
| 4149 | MAX   | 79666 | PLEKHF2  | R  |
| 4152 | MBD1  | 6839  | SUV39H1  | L  |
| 4152 | MBD1  | 10036 | CHAF1A   | L  |
| 4152 | MBD1  | 10114 | HIPK3    | L  |
| 4152 | MBD1  | 23468 | CBX5     | L  |
| 4152 | MBD1  | 55729 | ATF7IP   | L  |
| 4152 | MBD1  | 57473 | GM632    | L  |
| 4153 | MBL2  | 5648  | MASP1    | L  |
| 4153 | MBL2  | 5788  | PTPRC    | L  |
| 4153 | MBL2  | 6399  | TRAPPC2  | L  |
| 4153 | MBL2  | 10747 | MASP2    | L  |
| 4153 | MBL2  | 22918 | C1QR1    | L  |
| 4155 | MBP   | 4316  | MMP7     | L  |
| 4155 | MBP   | 5354  | PLP1     | L  |
| 4155 | MBP   | 5603  | MAPK13   | L  |
| 4155 | MBP   | 5901  | RAN      | L  |
| 4155 | MBP   | 6789  | STK4     | L  |
| 4155 | MBP   | 8550  | MAPKAPK5 | L  |
| 4155 | MBP   | 8569  | MKNK1    | L  |
| 4155 | MBP   | 8576  | STK16    | L  |
| 4155 | MBP   | 9149  | DYRK1B   | L  |
| 4155 | MBP   | 10419 | SKB1     | L  |
| 4155 | MBP   | 11011 | TLK2     | L  |
| 4155 | MBP   | 27347 | STK39    | L  |
| 4155 | MBP   | 51755 | CRK7     | L  |
| 4155 | MBP   | 51765 | MASK     | L  |
| 4155 | MBP   | 54822 | TRPM7    | L  |
| 4155 | MBP   | 55589 | BMP2K    | L  |
| 4155 | MBP   | 58190 | CTDSP1   | L  |
| 4155 | MBP   | 91754 | NEK9     | L  |
| 4157 | MC1R  | 4160  | MC4R     | L  |
| 4157 | MC1R  | 5443  | POMC     | L  |
| 4158 | MC2R  | 5443  | POMC     | L  |
| 4160 | MC4R  | 4852  | NPY      | L  |
| 4160 | MC4R  | 5443  | POMC     | L  |
| 4161 | MC5R  | 5443  | POMC     | L  |
| 4162 | MCAM  | 55729 | ATF7IP   | L  |
| 4168 | MCF2  | 10188 | TNK2     | L  |
| 4170 | MCL1  | 8658  | TNKS     | L  |
| 4170 | MCL1  | 10018 | BCL2L11  | L  |
| 4171 | MCM2  | 4172  | MCM3     | L  |
| 4171 | MCM2  | 4174  | MCM5     | L  |
| 4171 | MCM2  | 4175  | MCM6     | RL |
| 4171 | MCM2  | 4176  | MCM7     | L  |
| 4171 | MCM2  | 4356  | MPP3     | S  |
| 4171 | MCM2  | 4998  | ORC1L    | L  |
| 4171 | MCM2  | 4999  | ORC2L    | L  |
| 4171 | MCM2  | 5000  | ORC4L    | L  |
| 4171 | MCM2  | 5001  | ORC5L    | L  |
| 4171 | MCM2  | 6117  | RPA1     | L  |
| 4171 | MCM2  | 6118  | RPA2     | L  |

|      |      |        |          |    |
|------|------|--------|----------|----|
| 4171 | MCM2 | 6119   | RPA3     | L  |
| 4171 | MCM2 | 6191   | RPS4X    | S  |
| 4171 | MCM2 | 6908   | TBP      | L  |
| 4171 | MCM2 | 8290   | HIST3H3  | L  |
| 4171 | MCM2 | 8317   | CDC7     | L  |
| 4171 | MCM2 | 9133   | CCNB2    | L  |
| 4171 | MCM2 | 10270  | AKAP8    | L  |
| 4171 | MCM2 | 10681  | GNB5     | S  |
| 4171 | MCM2 | 10926  | ASK      | L  |
| 4171 | MCM2 | 11143  | MYST2    | L  |
| 4171 | MCM2 | 23594  | ORC6L    | L  |
| 4171 | MCM2 | 25843  | PREI3    | S  |
| 4171 | MCM2 | 29894  | CPSF1    | L  |
| 4171 | MCM2 | 55388  | MCM10    | L  |
| 4172 | MCM3 | 4174   | MCM5     | L  |
| 4172 | MCM3 | 4175   | MCM6     | L  |
| 4172 | MCM3 | 4176   | MCM7     | L  |
| 4172 | MCM3 | 5000   | ORC4L    | L  |
| 4172 | MCM3 | 5001   | ORC5L    | L  |
| 4172 | MCM3 | 6772   | STAT1    | L  |
| 4172 | MCM3 | 8317   | CDC7     | L  |
| 4172 | MCM3 | 8318   | CDC45L   | L  |
| 4172 | MCM3 | 8888   | MCM3AP   | L  |
| 4172 | MCM3 | 10926  | ASK      | L  |
| 4172 | MCM3 | 55388  | MCM10    | L  |
| 4172 | MCM3 | 115106 | CCDC5    | L  |
| 4173 | MCM4 | 4175   | MCM6     | L  |
| 4173 | MCM4 | 4176   | MCM7     | L  |
| 4173 | MCM4 | 8317   | CDC7     | L  |
| 4173 | MCM4 | 8900   | CCNA1    | L  |
| 4173 | MCM4 | 23594  | ORC6L    | L  |
| 4173 | MCM4 | 55388  | MCM10    | L  |
| 4173 | MCM4 | 115106 | CCDC5    | L  |
| 4174 | MCM5 | 4176   | MCM7     | L  |
| 4174 | MCM5 | 4188   | MDFI     | R  |
| 4174 | MCM5 | 4998   | ORC1L    | L  |
| 4174 | MCM5 | 5001   | ORC5L    | L  |
| 4174 | MCM5 | 6772   | STAT1    | L  |
| 4174 | MCM5 | 8317   | CDC7     | L  |
| 4174 | MCM5 | 23595  | ORC3L    | L  |
| 4175 | MCM6 | 4300   | MLLT3    | R  |
| 4175 | MCM6 | 5682   | PSMA1    | R  |
| 4175 | MCM6 | 8900   | CCNA1    | L  |
| 4175 | MCM6 | 23594  | ORC6L    | L  |
| 4175 | MCM6 | 26525  | IL1F5    | R  |
| 4175 | MCM6 | 51053  | GMNN     | L  |
| 4175 | MCM6 | 55388  | MCM10    | RL |
| 4175 | MCM6 | 79005  | SCNM1    | R  |
| 4175 | MCM6 | 81620  | CDT1     | L  |
| 4175 | MCM6 | 84289  | ING5     | R  |
| 4175 | MCM6 | 151254 | ALS2CR11 | R  |
| 4176 | MCM7 | 4331   | MNAT1    | L  |
| 4176 | MCM7 | 4998   | ORC1L    | L  |
| 4176 | MCM7 | 4999   | ORC2L    | L  |
| 4176 | MCM7 | 5000   | ORC4L    | L  |
| 4176 | MCM7 | 5001   | ORC5L    | L  |
| 4176 | MCM7 | 5925   | RB1      | L  |
| 4176 | MCM7 | 5933   | RBL1     | L  |
| 4176 | MCM7 | 5934   | RBL2     | L  |
| 4176 | MCM7 | 6117   | RPA1     | L  |
| 4176 | MCM7 | 7337   | UBE3A    | L  |
| 4176 | MCM7 | 8290   | HIST3H3  | L  |
| 4176 | MCM7 | 8317   | CDC7     | L  |
| 4176 | MCM7 | 8318   | CDC45L   | L  |
| 4176 | MCM7 | 9939   | RBM8A    | R  |
| 4176 | MCM7 | 10926  | ASK      | L  |
| 4176 | MCM7 | 11277  | TREX1    | L  |

|      |        |       |           |   |
|------|--------|-------|-----------|---|
| 4176 | MCM7   | 23594 | ORC6L     | L |
| 4176 | MCM7   | 23595 | ORC3L     | L |
| 4176 | MCM7   | 51562 | MBIP      | R |
| 4176 | MCM7   | 55388 | MCM10     | L |
| 4179 | MCP    | 4478  | MSN       | L |
| 4179 | MCP    | 6714  | SRC       | L |
| 4179 | MCP    | 7106  | TSPAN4    | L |
| 4179 | MCP    | 7525  | YES1      | L |
| 4184 | SMCP   | 5359  | PLSCR1    | R |
| 4184 | SMCP   | 83755 | KRTAP4-12 | R |
| 4185 | ADAM11 | 8614  | STC2      | S |
| 4188 | MDFI   | 4656  | MYOG      | L |
| 4188 | MDFI   | 5013  | OTX1      | R |
| 4188 | MDFI   | 5300  | PIN1      | R |
| 4188 | MDFI   | 5819  | PVRL2     | R |
| 4188 | MDFI   | 5990  | RFX2      | R |
| 4188 | MDFI   | 6495  | SIX1      | R |
| 4188 | MDFI   | 6548  | SLC9A1    | R |
| 4188 | MDFI   | 6687  | SPG7      | R |
| 4188 | MDFI   | 6890  | TAP1      | R |
| 4188 | MDFI   | 6944  | VPS72     | R |
| 4188 | MDFI   | 7355  | SLC35A2   | R |
| 4188 | MDFI   | 7376  | NR1H2     | R |
| 4188 | MDFI   | 7597  | ZBTB25    | R |
| 4188 | MDFI   | 7695  | ZNF136    | R |
| 4188 | MDFI   | 7755  | ZNF205    | R |
| 4188 | MDFI   | 8227  | DXYS155E  | R |
| 4188 | MDFI   | 8326  | FZD9      | R |
| 4188 | MDFI   | 9139  | CBFA2T2   | R |
| 4188 | MDFI   | 9140  | ATG12     | R |
| 4188 | MDFI   | 9721  | KIAA0514  | R |
| 4188 | MDFI   | 9726  | ZNF646    | R |
| 4188 | MDFI   | 9729  | KIAA0408  | R |
| 4188 | MDFI   | 9814  | SFI1      | R |
| 4188 | MDFI   | 9841  | ZBTB24    | R |
| 4188 | MDFI   | 9907  | KIAA0415  | R |
| 4188 | MDFI   | 10148 | EBI3      | R |
| 4188 | MDFI   | 10169 | SERF2     | R |
| 4188 | MDFI   | 10758 | TRAF3IP2  | R |
| 4188 | MDFI   | 10922 | FASTK     | R |
| 4188 | MDFI   | 22822 | PHLDA1    | R |
| 4188 | MDFI   | 22893 | BAHD1     | R |
| 4188 | MDFI   | 22943 | DKK1      | R |
| 4188 | MDFI   | 23549 | DNPEP     | R |
| 4188 | MDFI   | 25796 | PGLS      | R |
| 4188 | MDFI   | 26505 | CNNM3     | R |
| 4188 | MDFI   | 26511 | CHIC2     | R |
| 4188 | MDFI   | 50717 | WDR42A    | R |
| 4188 | MDFI   | 51298 | THEG      | R |
| 4188 | MDFI   | 51545 | ZNF581    | R |
| 4188 | MDFI   | 54461 | FBXW5     | R |
| 4188 | MDFI   | 54973 | CPSF3L    | R |
| 4188 | MDFI   | 55049 | FLJ20850  | R |
| 4188 | MDFI   | 55093 | C8orf32   | R |
| 4188 | MDFI   | 55308 | DDX19A    | R |
| 4188 | MDFI   | 55367 | LRDD      | R |
| 4188 | MDFI   | 55503 | TRPV6     | R |
| 4188 | MDFI   | 55684 | C9orf86   | R |
| 4188 | MDFI   | 55885 | LMO3      | R |
| 4188 | MDFI   | 56654 | NPDC1     | R |
| 4188 | MDFI   | 60496 | AASDHPPT  | R |
| 4188 | MDFI   | 64129 | TINAGL1   | R |
| 4188 | MDFI   | 64745 | FLJ20859  | R |
| 4188 | MDFI   | 79088 | ZNF426    | R |
| 4188 | MDFI   | 79797 | ZNF408    | R |
| 4188 | MDFI   | 79843 | FLJ22746  | R |
| 4188 | MDFI   | 79870 | BAALC     | R |

|      |        |        |          |   |
|------|--------|--------|----------|---|
| 4188 | MDFI   | 80764  | THAP7    | R |
| 4188 | MDFI   | 84080  | C16orf48 | R |
| 4188 | MDFI   | 84527  | ZNF559   | R |
| 4188 | MDFI   | 84733  | CBX2     | R |
| 4188 | MDFI   | 84775  | ZNF607   | R |
| 4188 | MDFI   | 85019  | C18orf45 | R |
| 4188 | MDFI   | 90060  | JM11     | R |
| 4188 | MDFI   | 90594  | ZNF439   | R |
| 4188 | MDFI   | 92595  | MGC13138 | R |
| 4188 | MDFI   | 94039  | ZNF101   | R |
| 4188 | MDFI   | 113655 | MFSD3    | R |
| 4188 | MDFI   | 115817 | DHRS1    | R |
| 4188 | MDFI   | 117144 | CATSPER1 | R |
| 4188 | MDFI   | 126070 | ZNF440   | R |
| 4188 | MDFI   | 147687 | ZNF417   | R |
| 4188 | MDFI   | 154313 | C6orf165 | R |
| 4188 | MDFI   | 154865 | FLJ35834 | R |
| 4188 | MDFI   | 157773 | C8orf48  | R |
| 4188 | MDFI   | 164127 | C1orf65  | R |
| 4188 | MDFI   | 164312 | C20orf75 | R |
| 4188 | MDFI   | 164592 | FLJ36046 | R |
| 4188 | MDFI   | 168417 | ZNF679   | R |
| 4188 | MDFI   | 196477 | C12orf12 | R |
| 4188 | MDFI   | 286075 | ZNF707   | R |
| 4188 | MDFI   | 286301 | MGC42630 | R |
| 4188 | MDFI   | 389741 | MGC21881 | R |
| 4188 | MDFI   | 414157 | C10orf62 | R |
| 4188 | MDFI   | 494514 | C18orf56 | R |
| 4189 | DNAJB9 | 4637   | MYL6     | S |
| 4189 | DNAJB9 | 5347   | PLK1     | S |
| 4189 | DNAJB9 | 6624   | FSCN1    | S |
| 4189 | DNAJB9 | 6919   | TCEA2    | S |
| 4189 | DNAJB9 | 8655   | DNCL1    | S |
| 4189 | DNAJB9 | 10915  | TCERG1   | L |
| 4189 | DNAJB9 | 23539  | SLC16A8  | S |
| 4189 | DNAJB9 | 55312  | RFK      | S |
| 4190 | MDH1   | 4356   | MPP3     | S |
| 4191 | MDH2   | 4719   | NDUFS1   | L |
| 4191 | MDH2   | 5091   | PC       | L |
| 4191 | MDH2   | 7453   | WARS     | S |
| 4192 | MDK    | 4691   | NCL      | L |
| 4192 | MDK    | 5787   | PTPRB    | L |
| 4192 | MDK    | 5803   | PTPRZ1   | L |
| 4192 | MDK    | 6142   | RPL18A   | S |
| 4192 | MDK    | 6382   | SDC1     | L |
| 4192 | MDK    | 6385   | SDC4     | L |
| 4192 | MDK    | 6772   | STAT1    | L |
| 4192 | MDK    | 7051   | TGM1     | L |
| 4192 | MDK    | 9672   | SDC3     | L |
| 4193 | MDM2   | 4194   | MDM4     | L |
| 4193 | MDM2   | 5371   | PML      | L |
| 4193 | MDM2   | 5426   | POLE     | L |
| 4193 | MDM2   | 5925   | RB1      | L |
| 4193 | MDM2   | 6135   | RPL11    | L |
| 4193 | MDM2   | 6872   | TAF1     | L |
| 4193 | MDM2   | 7157   | TP53     | L |
| 4193 | MDM2   | 7161   | TP73     | L |
| 4193 | MDM2   | 7251   | TSG101   | L |
| 4193 | MDM2   | 7341   | SUMO1    | L |
| 4193 | MDM2   | 8650   | NUMB     | L |
| 4193 | MDM2   | 8850   | PCAF     | L |
| 4193 | MDM2   | 10524  | HTATIP   | L |
| 4193 | MDM2   | 23741  | CRI1     | L |
| 4193 | MDM2   | 64219  | PJA1     | L |
| 4194 | MDM4   | 5925   | RB1      | L |
| 4194 | MDM4   | 7157   | TP53     | L |
| 4194 | MDM4   | 7321   | UBE2D1   | L |

|      |        |        |         |   |
|------|--------|--------|---------|---|
| 4200 | ME2    | 8655   | DNCL1   | L |
| 4204 | MECP2  | 6497   | SKI     | L |
| 4204 | MECP2  | 9611   | NCOR1   | L |
| 4204 | MECP2  | 55660  | FNBP3   | L |
| 4205 | MEF2A  | 4209   | MEF2D   | L |
| 4205 | MEF2A  | 4654   | MYOD1   | L |
| 4205 | MEF2A  | 4656   | MYOG    | L |
| 4205 | MEF2A  | 5598   | MAPK7   | L |
| 4205 | MEF2A  | 7003   | TEAD1   | L |
| 4205 | MEF2A  | 7067   | THRA    | L |
| 4205 | MEF2A  | 9734   | HDAC9   | L |
| 4205 | MEF2A  | 9759   | HDAC4   | L |
| 4205 | MEF2A  | 10014  | HDAC5   | L |
| 4207 | MEF2B  | 23523  | CABIN1  | L |
| 4207 | MEF2B  | 56159  | TEX11   | R |
| 4208 | MEF2C  | 4209   | MEF2D   | L |
| 4208 | MEF2C  | 5598   | MAPK7   | L |
| 4208 | MEF2C  | 6667   | SP1     | L |
| 4208 | MEF2C  | 9686   | VGLL4   | L |
| 4208 | MEF2C  | 9759   | HDAC4   | L |
| 4208 | MEF2C  | 54345  | SOX18   | L |
| 4208 | MEF2C  | 117581 | TWIST2  | L |
| 4209 | MEF2D  | 4773   | NFATC2  | L |
| 4209 | MEF2D  | 5598   | MAPK7   | L |
| 4209 | MEF2D  | 6667   | SP1     | L |
| 4209 | MEF2D  | 9759   | HDAC4   | L |
| 4210 | MEFV   | 29108  | PYCARD  | L |
| 4211 | MEIS1  | 5089   | PBX2    | L |
| 4211 | MEIS1  | 10481  | HOXB13  | L |
| 4215 | MAP3K3 | 5607   | MAP2K5  | L |
| 4215 | MAP3K3 | 7531   | YWHAE   | L |
| 4215 | MAP3K3 | 7534   | YWHAZ   | L |
| 4215 | MAP3K3 | 7704   | ZBTB16  | S |
| 4215 | MAP3K3 | 8737   | RIPK1   | L |
| 4215 | MAP3K3 | 9043   | SPAG9   | L |
| 4216 | MAP3K4 | 4616   | GADD45B | L |
| 4216 | MAP3K4 | 5603   | MAPK13  | L |
| 4216 | MAP3K4 | 5604   | MAP2K1  | L |
| 4216 | MAP3K4 | 5606   | MAP2K3  | L |
| 4216 | MAP3K4 | 5608   | MAP2K6  | L |
| 4216 | MAP3K4 | 6416   | MAP2K4  | L |
| 4216 | MAP3K4 | 10912  | GADD45G | L |
| 4216 | MAP3K4 | 29127  | RACGAP1 | L |
| 4217 | MAP3K5 | 5536   | PPP5C   | L |
| 4217 | MAP3K5 | 5610   | EIF2AK2 | L |
| 4217 | MAP3K5 | 5859   | QARS    | L |
| 4217 | MAP3K5 | 5894   | RAF1    | L |
| 4217 | MAP3K5 | 6885   | MAP3K7  | L |
| 4217 | MAP3K5 | 7186   | TRAF2   | L |
| 4217 | MAP3K5 | 7188   | TRAF5   | L |
| 4217 | MAP3K5 | 7189   | TRAF6   | L |
| 4217 | MAP3K5 | 7295   | TXN     | L |
| 4217 | MAP3K5 | 7534   | YWHAZ   | L |
| 4217 | MAP3K5 | 9064   | MAP3K6  | L |
| 4217 | MAP3K5 | 10016  | PDCD6   | L |
| 4217 | MAP3K5 | 153090 | DAB2IP  | L |
| 4218 | RAB8A  | 5871   | MAP4K2  | L |
| 4218 | RAB8A  | 7917   | BAT3    | S |
| 4218 | RAB8A  | 9501   | RPH3AL  | L |
| 4218 | RAB8A  | 9699   | RIMS2   | L |
| 4218 | RAB8A  | 10084  | PQBP1   | S |
| 4218 | RAB8A  | 10133  | OPTN    | L |
| 4218 | RAB8A  | 94121  | SYTL4   | L |
| 4218 | RAB8A  | 117177 | RAB3IP  | L |
| 4221 | MEN1   | 4790   | NFKB1   | L |
| 4221 | MEN1   | 4791   | NFKB2   | L |
| 4221 | MEN1   | 5970   | RELA    | L |

|      |        |        |           |   |
|------|--------|--------|-----------|---|
| 4221 | MEN1   | 6118   | RPA2      | L |
| 4221 | MEN1   | 7431   | VIM       | L |
| 4222 | MEOX1  | 5075   | PAX1      | L |
| 4223 | MEOX2  | 5075   | PAX1      | L |
| 4223 | MEOX2  | 5077   | PAX3      | L |
| 4223 | MEOX2  | 7288   | TULP2     | R |
| 4223 | MEOX2  | 7432   | VIP       | R |
| 4223 | MEOX2  | 8153   | RND2      | R |
| 4223 | MEOX2  | 25813  | SAMM50    | R |
| 4223 | MEOX2  | 83755  | KRTAP4-12 | R |
| 4224 | MEP1A  | 4225   | MEP1B     | L |
| 4224 | MEP1A  | 5741   | PTH       | L |
| 4224 | MEP1A  | 284217 | LAMA1     | L |
| 4225 | MEP1B  | 5697   | PYY       | L |
| 4233 | MET    | 5781   | PTPN11    | L |
| 4233 | MET    | 6464   | SHC1      | L |
| 4233 | MET    | 6714   | SRC       | L |
| 4233 | MET    | 6774   | STAT3     | L |
| 4233 | MET    | 9146   | HGS       | L |
| 4233 | MET    | 10048  | RANBP9    | L |
| 4233 | MET    | 11146  | GLMN      | L |
| 4233 | MET    | 30011  | SH3KBP1   | L |
| 4234 | METTL1 | 10785  | WDR4      | R |
| 4239 | MFAP4  | 6441   | SFTPD     | L |
| 4242 | MFNG   | 4851   | NOTCH1    | L |
| 4242 | MFNG   | 4853   | NOTCH2    | L |
| 4254 | KITLG  | 5293   | PIK3CD    | L |
| 4254 | KITLG  | 6320   | CLEC11A   | L |
| 4254 | KITLG  | 9820   | CUL7      | L |
| 4255 | MGMT   | 5566   | PRKACA    | L |
| 4255 | MGMT   | 7317   | UBE1      | L |
| 4258 | MGST2  | 307255 | (null)    | S |
| 4261 | CIITA  | 4801   | NFYB      | L |
| 4261 | CIITA  | 5993   | RFX5      | L |
| 4261 | CIITA  | 7514   | XPO1      | L |
| 4261 | CIITA  | 8625   | RFXANK    | L |
| 4261 | CIITA  | 8648   | NCOA1     | L |
| 4267 | CD99   | 29979  | UBQLN1    | R |
| 4276 | MICA   | 22914  | KLRK1     | L |
| 4281 | MID1   | 11043  | MID2      | L |
| 4282 | MIF    | 7414   | VCL       | L |
| 4282 | MIF    | 10987  | COPS5     | L |
| 4282 | MIF    | 26003  | GORASP2   | R |
| 4282 | MIF    | 29888  | STRN4     | S |
| 4282 | MIF    | 79797  | ZNF408    | L |
| 4282 | MIF    | 149428 | BNIPL     | L |
| 4286 | MITF   | 5080   | PAX6      | L |
| 4286 | MITF   | 6688   | SPI1      | L |
| 4286 | MITF   | 7030   | TFE3      | L |
| 4286 | MITF   | 7329   | UBE2I     | L |
| 4286 | MITF   | 7341   | SUMO1     | L |
| 4286 | MITF   | 7942   | TFEB      | L |
| 4286 | MITF   | 10401  | PIAS3     | L |
| 4286 | MITF   | 22797  | TFEC      | L |
| 4286 | MITF   | 23598  | ZNF278    | L |
| 4286 | MITF   | 51176  | LEF1      | L |
| 4287 | ATXN3  | 5886   | RAD23A    | L |
| 4287 | ATXN3  | 5887   | RAD23B    | L |
| 4287 | ATXN3  | 7415   | VCP       | L |
| 4288 | MKI67  | 5579   | PRKCB1    | L |
| 4288 | MKI67  | 11335  | CBX3      | L |
| 4288 | MKI67  | 23468  | CBX5      | L |
| 4288 | MKI67  | 56992  | KIF15     | L |
| 4291 | MLF1   | 7534   | YWHAZ     | L |
| 4291 | MLF1   | 29959  | NRBP      | L |
| 4292 | MLH1   | 4438   | MSH4      | L |
| 4292 | MLH1   | 4609   | MYC       | L |

|      |         |        |               |   |
|------|---------|--------|---------------|---|
| 4292 | MLH1    | 5378   | PMS1          | L |
| 4292 | MLH1    | 5395   | PMS2          | L |
| 4292 | MLH1    | 8930   | MBD4          | L |
| 4292 | MLH1    | 9156   | EXO1          | L |
| 4292 | MLH1    | 9877   | ZC3H11A       | R |
| 4292 | MLH1    | 22888  | UBOX5         | R |
| 4292 | MLH1    | 23650  | TRIM29        | R |
| 4292 | MLH1    | 27030  | MLH3          | L |
| 4292 | MLH1    | 122786 | FRMD6         | R |
| 4294 | MAP3K10 | 5245   | PHB           | L |
| 4294 | MAP3K10 | 6416   | MAP2K4        | L |
| 4294 | MAP3K10 | 7280   | TUBB2         | L |
| 4294 | MAP3K10 | 7531   | YWHAE         | L |
| 4294 | MAP3K10 | 9371   | KIF3B         | L |
| 4294 | MAP3K10 | 10059  | DNM1L         | L |
| 4294 | MAP3K10 | 11127  | KIF3A         | L |
| 4294 | MAP3K10 | 22920  | KIFAP3        | L |
| 4294 | MAP3K10 | 29127  | RACGAP1       | L |
| 4296 | MAP3K11 | 5604   | MAP2K1        | L |
| 4296 | MAP3K11 | 5609   | MAP2K7        | L |
| 4296 | MAP3K11 | 5879   | RAC1          | L |
| 4296 | MAP3K11 | 7786   | MAP3K12       | L |
| 4296 | MAP3K11 | 11127  | KIF3A         | L |
| 4296 | MAP3K11 | 11184  | MAP4K1        | L |
| 4296 | MAP3K11 | 23542  | MAPK8IP2      | L |
| 4297 | MLL     | 5364   | PLXNB1        | L |
| 4297 | MLL     | 6418   | SET           | L |
| 4297 | MLL     | 10450  | PPIE          | L |
| 4297 | MLL     | 23645  | PPP1R15A      | L |
| 4300 | MLLT3   | 5764   | PTN           | S |
| 4300 | MLLT3   | 10513  | APPBP2        | R |
| 4300 | MLLT3   | 54880  | BCOR          | L |
| 4300 | MLLT3   | 55791  | C1orf103      | S |
| 4300 | MLLT3   | 84060  | DKFZP564O0523 | S |
| 4301 | MLLT4   | 5216   | PFN1          | L |
| 4301 | MLLT4   | 5818   | PVRL1         | L |
| 4301 | MLLT4   | 5819   | PVRL2         | L |
| 4301 | MLLT4   | 5906   | RAP1A         | L |
| 4301 | MLLT4   | 5909   | RAP1GA1       | L |
| 4301 | MLLT4   | 5911   | RAP2A         | L |
| 4301 | MLLT4   | 6016   | RIT1          | L |
| 4301 | MLLT4   | 6237   | RRAS          | L |
| 4301 | MLLT4   | 7082   | TJP1          | L |
| 4301 | MLLT4   | 8239   | USP9X         | L |
| 4301 | MLLT4   | 9369   | NRXN3         | L |
| 4301 | MLLT4   | 10580  | SORBS1        | L |
| 4301 | MLLT4   | 22800  | RRAS2         | L |
| 4301 | MLLT4   | 22808  | MRAS          | L |
| 4301 | MLLT4   | 25945  | PVRL3         | L |
| 4301 | MLLT4   | 117178 | SSX2IP        | L |
| 4302 | MLLT6   | 51586  | PCQAP         | R |
| 4303 | MLLT7   | 7514   | XPO1          | L |
| 4306 | NR3C2   | 8805   | TRIM24        | L |
| 4306 | NR3C2   | 10728  | PTGES3        | L |
| 4311 | MME     | 5291   | PIK3CB        | L |
| 4311 | MME     | 5295   | PIK3R1        | L |
| 4311 | MME     | 6464   | SHC1          | L |
| 4312 | MMP1    | 4316   | MMP7          | L |
| 4312 | MMP1    | 7076   | TIMP1         | L |
| 4312 | MMP1    | 63827  | BCAN          | L |
| 4313 | MMP2    | 4326   | MMP17         | L |
| 4313 | MMP2    | 6354   | CCL7          | L |
| 4313 | MMP2    | 6387   | CXCL12        | L |
| 4313 | MMP2    | 7040   | TGFB1         | L |
| 4313 | MMP2    | 7057   | THBS1         | L |
| 4313 | MMP2    | 7058   | THBS2         | L |
| 4313 | MMP2    | 7077   | TIMP2         | L |

|      |       |        |               |   |
|------|-------|--------|---------------|---|
| 4313 | MMP2  | 7078   | TIMP3         | L |
| 4313 | MMP2  | 7079   | TIMP4         | L |
| 4313 | MMP2  | 9076   | CLDN1         | L |
| 4313 | MMP2  | 23621  | BACE1         | L |
| 4313 | MMP2  | 63827  | BCAN          | L |
| 4313 | MMP2  | 80781  | COL18A1       | L |
| 4314 | MMP3  | 7076   | TIMP1         | L |
| 4314 | MMP3  | 7078   | TIMP3         | L |
| 4314 | MMP3  | 63827  | BCAN          | L |
| 4316 | MMP7  | 4318   | MMP9          | L |
| 4316 | MMP7  | 4803   | NGFB          | L |
| 4316 | MMP7  | 63827  | BCAN          | L |
| 4317 | MMP8  | 7077   | TIMP2         | L |
| 4317 | MMP8  | 63827  | BCAN          | L |
| 4318 | MMP9  | 5858   | PZP           | L |
| 4318 | MMP9  | 6374   | CXCL5         | L |
| 4318 | MMP9  | 7057   | THBS1         | L |
| 4318 | MMP9  | 7058   | THBS2         | L |
| 4318 | MMP9  | 7078   | TIMP3         | L |
| 4318 | MMP9  | 8434   | RECK          | L |
| 4319 | MMP10 | 63827  | BCAN          | L |
| 4320 | MMP11 | 55660  | FNBP3         | L |
| 4322 | MMP13 | 7078   | TIMP3         | L |
| 4322 | MMP13 | 11096  | ADAMTS5       | L |
| 4322 | MMP13 | 63827  | BCAN          | L |
| 4323 | MMP14 | 7077   | TIMP2         | L |
| 4323 | MMP14 | 7078   | TIMP3         | L |
| 4323 | MMP14 | 9076   | CLDN1         | L |
| 4331 | MNAT1 | 5451   | POU2F1        | L |
| 4331 | MNAT1 | 5452   | POU2F2        | L |
| 4331 | MNAT1 | 5460   | POU5F1        | L |
| 4331 | MNAT1 | 5925   | RB1           | L |
| 4331 | MNAT1 | 7157   | TP53          | L |
| 4331 | MNAT1 | 9112   | MTA1          | L |
| 4331 | MNAT1 | 10980  | COPS6         | S |
| 4331 | MNAT1 | 55791  | C1orf103      | S |
| 4331 | MNAT1 | 79803  | HPS6          | S |
| 4331 | MNAT1 | 84060  | DKFZP564O0523 | S |
| 4331 | MNAT1 | 404672 | GTF2H5        | L |
| 4335 | MNT   | 25942  | SIN3A         | L |
| 4338 | MOCS2 | 6133   | RPL9          | S |
| 4338 | MOCS2 | 27304  | MOCS3         | L |
| 4338 | MOCS2 | 55324  | ABCF3         | S |
| 4342 | MOS   | 4654   | MYOD1         | L |
| 4345 | CD200 | 131450 | CD200R1       | L |
| 4350 | MPG   | 5886   | RAD23A        | L |
| 4350 | MPG   | 5887   | RAD23B        | L |
| 4352 | MPL   | 7066   | THPO          | L |
| 4352 | MPL   | 11273  | ATXN2L        | L |
| 4354 | MPP1  | 9905   | RUTBC1        | S |
| 4354 | MPP1  | 10273  | STUB1         | S |
| 4354 | MPP1  | 51421  | AMOTL2        | R |
| 4356 | MPP3  | 6187   | RPS2          | S |
| 4356 | MPP3  | 6326   | SCN2A2        | S |
| 4356 | MPP3  | 9001   | HAP1          | S |
| 4356 | MPP3  | 10769  | PLK2          | S |
| 4356 | MPP3  | 11031  | RAB31         | S |
| 4356 | MPP3  | 23450  | SF3B3         | S |
| 4356 | MPP3  | 23705  | IGSF4         | L |
| 4356 | MPP3  | 55709  | KBTD4         | S |
| 4356 | MPP3  | 84273  | C4orf14       | S |
| 4356 | MPP3  | 90933  | TRIM41        | S |
| 4356 | MPP3  | 284208 | B3GNTL1       | S |
| 4356 | MPP3  | 339230 | MGC16597      | S |
| 4356 | MPP3  | 339231 | LOC339231     | S |
| 4356 | MPP3  | 378464 | MOPT          | S |
| 4359 | MPZ   | 5376   | PMP22         | L |



|      |        |        |          |   |
|------|--------|--------|----------|---|
| 4359 | MPZ    | 54984  | PINX1    | S |
| 4360 | MRC1   | 11200  | CHEK2    | L |
| 4361 | MRE11A | 4750   | NEK1     | L |
| 4435 | CITED1 | 7022   | TFAP2C   | L |
| 4436 | MSH2   | 4437   | MSH3     | L |
| 4436 | MSH2   | 5111   | PCNA     | L |
| 4436 | MSH2   | 8243   | SMC1L1   | L |
| 4436 | MSH2   | 9156   | EXO1     | L |
| 4436 | MSH2   | 11200  | CHEK2    | L |
| 4436 | MSH2   | 11277  | TREX1    | L |
| 4437 | MSH3   | 5111   | PCNA     | L |
| 4437 | MSH3   | 9156   | EXO1     | L |
| 4438 | MSH4   | 4439   | MSH5     | L |
| 4438 | MSH4   | 6117   | RPA1     | L |
| 4438 | MSH4   | 7411   | VBP1     | L |
| 4438 | MSH4   | 27030  | MLH3     | L |
| 4440 | MSI1   | 9240   | PNMA1    | S |
| 4477 | MSMB   | 284169 | (null)   | S |
| 4478 | MSN    | 4689   | NCF4     | L |
| 4478 | MSN    | 5339   | PLEC1    | L |
| 4478 | MSN    | 6693   | SPN      | L |
| 4478 | MSN    | 6850   | SYK      | L |
| 4478 | MSN    | 7248   | TSC1     | L |
| 4478 | MSN    | 7412   | VCAM1    | L |
| 4478 | MSN    | 7430   | VIL2     | L |
| 4478 | MSN    | 9368   | SLC9A3R1 | L |
| 4485 | MST1   | 4486   | MST1R    | L |
| 4486 | MST1R  | 5295   | PIK3R1   | L |
| 4486 | MST1R  | 5335   | PLCG1    | L |
| 4486 | MST1R  | 6464   | SHC1     | L |
| 4486 | MST1R  | 6714   | SRC      | L |
| 4486 | MST1R  | 8692   | HYAL2    | L |
| 4487 | MSX1   | 4488   | MSX2     | L |
| 4487 | MSX1   | 5077   | PAX3     | L |
| 4487 | MSX1   | 6000   | RGS7     | L |
| 4487 | MSX1   | 6667   | SP1      | L |
| 4487 | MSX1   | 6872   | TAF1     | L |
| 4487 | MSX1   | 6908   | TBP      | L |
| 4487 | MSX1   | 9355   | LHX2     | L |
| 4488 | MSX2   | 7709   | ZBTB17   | L |
| 4488 | MSX2   | 9063   | PIAS2    | L |
| 4488 | MSX2   | 9500   | MAGED1   | L |
| 4488 | MSX2   | 23013  | SPEN     | L |
| 4502 | MT2A   | 5587   | PRKD1    | L |
| 4507 | MTAP   | 29116  | MYLIP    | L |
| 4520 | MTF1   | 8907   | AP1M1    | R |
| 4524 | MTHFR  | 51691  | LSM8     | L |
| 4543 | MTNR1A | 10672  | GNA13    | L |
| 4548 | MTR    | 8655   | DNCL1    | L |
| 4582 | MUC1   | 5580   | PRKCD    | L |
| 4582 | MUC1   | 6654   | SOS1     | L |
| 4582 | MUC1   | 6714   | SRC      | L |
| 4582 | MUC1   | 55644  | OSGEP    | L |
| 4589 | MUC7   | 6402   | SELL     | L |
| 4591 | TRIM37 | 7185   | TRAF1    | L |
| 4591 | TRIM37 | 7186   | TRAF2    | L |
| 4591 | TRIM37 | 7187   | TRAF3    | L |
| 4591 | TRIM37 | 7188   | TRAF5    | L |
| 4591 | TRIM37 | 7189   | TRAF6    | L |
| 4591 | TRIM37 | 9055   | PRC1     | R |
| 4591 | TRIM37 | 9513   | FXR2     | R |
| 4591 | TRIM37 | 9618   | TRAF4    | L |
| 4591 | TRIM37 | 9729   | KIAA0408 | R |
| 4591 | TRIM37 | 9787   | DLG7     | R |
| 4591 | TRIM37 | 10445  | MCRS1    | R |
| 4591 | TRIM37 | 11170  | TU3A     | R |
| 4591 | TRIM37 | 11284  | PNKP     | R |

|      |        |        |           |   |
|------|--------|--------|-----------|---|
| 4591 | TRIM37 | 26150  | RIBC2     | R |
| 4591 | TRIM37 | 27301  | APEX2     | R |
| 4591 | TRIM37 | 51224  | TCEB3B    | R |
| 4591 | TRIM37 | 55388  | MCM10     | R |
| 4591 | TRIM37 | 55872  | PBK       | R |
| 4591 | TRIM37 | 79027  | ZNF655    | R |
| 4591 | TRIM37 | 79843  | FLJ22746  | R |
| 4591 | TRIM37 | 79873  | NUDT18    | R |
| 4591 | TRIM37 | 114822 | RHPN1     | R |
| 4591 | TRIM37 | 147687 | ZNF417    | R |
| 4591 | TRIM37 | 286514 | MAGEB18   | R |
| 4593 | MUSK   | 5913   | RAPSN     | L |
| 4593 | MUSK   | 23345  | SYNE1     | L |
| 4595 | MUTYH  | 5111   | PCNA      | L |
| 4595 | MUTYH  | 6117   | RPA1      | L |
| 4595 | MUTYH  | 90678  | LRSAM1    | S |
| 4597 | MVD    | 9044   | BTAF1     | L |
| 4597 | MVD    | 10681  | GNB5      | S |
| 4599 | MX1    | 7280   | TUBB2     | L |
| 4601 | MXI1   | 9126   | CSPG6     | L |
| 4602 | MYB    | 5079   | PAX5      | L |
| 4602 | MYB    | 5371   | PML       | L |
| 4602 | MYB    | 7329   | UBE2I     | L |
| 4602 | MYB    | 8458   | TTF2      | L |
| 4602 | MYB    | 10514  | MYBBP1A   | L |
| 4602 | MYB    | 27044  | SND1      | L |
| 4605 | MYBL2  | 5933   | RBL1      | L |
| 4605 | MYBL2  | 6502   | SKP2      | L |
| 4605 | MYBL2  | 7314   | UBB       | L |
| 4605 | MYBL2  | 8900   | CCNA1     | L |
| 4605 | MYBL2  | 9612   | NCOR2     | L |
| 4605 | MYBL2  | 27044  | SND1      | L |
| 4605 | MYBL2  | 90441  | ZNF622    | L |
| 4606 | MYBPC2 | 4608   | MYBPH     | L |
| 4607 | MYBPC3 | 7273   | TTN       | L |
| 4609 | MYC    | 4801   | NFYB      | L |
| 4609 | MYC    | 4802   | NFYC      | L |
| 4609 | MYC    | 5598   | MAPK7     | L |
| 4609 | MYC    | 5599   | MAPK8     | L |
| 4609 | MYC    | 5604   | MAP2K1    | L |
| 4609 | MYC    | 5891   | RAGE      | L |
| 4609 | MYC    | 5894   | RAF1      | L |
| 4609 | MYC    | 5925   | RB1       | L |
| 4609 | MYC    | 5933   | RBL1      | L |
| 4609 | MYC    | 5970   | RELA      | L |
| 4609 | MYC    | 6598   | SMARCB1   | L |
| 4609 | MYC    | 6667   | SP1       | L |
| 4609 | MYC    | 7021   | TFAP2B    | L |
| 4609 | MYC    | 7074   | TIAM1     | L |
| 4609 | MYC    | 7161   | TP73      | L |
| 4609 | MYC    | 7277   | TUBA1     | L |
| 4609 | MYC    | 7278   | TUBA2     | L |
| 4609 | MYC    | 7528   | YY1       | L |
| 4609 | MYC    | 7709   | ZBTB17    | L |
| 4609 | MYC    | 7846   | TUBA3     | L |
| 4609 | MYC    | 8295   | TRRAP     | L |
| 4609 | MYC    | 8464   | SUPT3H    | L |
| 4609 | MYC    | 9043   | SPAG9     | L |
| 4609 | MYC    | 9111   | NMI       | L |
| 4609 | MYC    | 10376  | K-ALPHA-1 | L |
| 4609 | MYC    | 10524  | HTATIP    | L |
| 4609 | MYC    | 23077  | MYCBP2    | L |
| 4609 | MYC    | 26292  | MYCBP     | L |
| 4609 | MYC    | 51807  | TUBA8     | L |
| 4613 | MYCN   | 9111   | NMI       | L |
| 4613 | MYCN   | 10138  | YAF2      | L |
| 4615 | MYD88  | 7098   | TLR3      | L |

|      |         |        |            |   |
|------|---------|--------|------------|---|
| 4615 | MYD88   | 7099   | TLR4       | L |
| 4615 | MYD88   | 8405   | SPOP       | R |
| 4615 | MYD88   | 8772   | FADD       | L |
| 4615 | MYD88   | 51135  | IRAK4      | L |
| 4615 | MYD88   | 114609 | TIRAP      | L |
| 4616 | GADD45B | 5111   | PCNA       | L |
| 4616 | GADD45B | 5465   | PPARA      | L |
| 4616 | GADD45B | 5467   | PPARD      | L |
| 4616 | GADD45B | 5468   | PPARG      | L |
| 4616 | GADD45B | 90480  | GADD45GIP1 | L |
| 4617 | MYF5    | 6929   | TCF3       | L |
| 4618 | MYF6    | 8048   | CSRP3      | L |
| 4620 | MYH2    | 5581   | PRKCE      | L |
| 4627 | MYH9    | 5829   | PXN        | L |
| 4627 | MYH9    | 7414   | VCL        | L |
| 4627 | MYH9    | 10398  | MYL9       | S |
| 4627 | MYH9    | 84164  | ASCC2      | S |
| 4628 | MYH10   | 5087   | PBX1       | L |
| 4628 | MYH10   | 10134  | BCAP31     | L |
| 4628 | MYH10   | 57473  | GM632      | L |
| 4629 | MYH11   | 8550   | MAPKAPK5   | L |
| 4633 | MYL2    | 4653   | MYOC       | L |
| 4633 | MYL2    | 5062   | PAK2       | L |
| 4633 | MYL2    | 54776  | PPP1R12C   | L |
| 4633 | MYL2    | 90678  | LRSAM1     | S |
| 4637 | MYL6    | 5829   | PXN        | L |
| 4637 | MYL6    | 7414   | VCL        | L |
| 4637 | MYL6    | 11051  | NUDT21     | R |
| 4637 | MYL6    | 25843  | PREI3      | S |
| 4638 | MYLK    | 5058   | PAK1       | L |
| 4638 | MYLK    | 5578   | PRKCA      | L |
| 4638 | MYLK    | 5595   | MAPK3      | L |
| 4638 | MYLK    | 6714   | SRC        | L |
| 4638 | MYLK    | 25865  | PRKD2      | L |
| 4644 | MYO5A   | 5873   | RAB27A     | L |
| 4644 | MYO5A   | 8655   | DNCL1      | L |
| 4644 | MYO5A   | 10612  | TRIM3      | L |
| 4644 | MYO5A   | 79083  | MLPH       | L |
| 4644 | MYO5A   | 140465 | MLC1SA     | L |
| 4645 | MYO5B   | 8766   | RAB11A     | L |
| 4645 | MYO5B   | 9230   | RAB11B     | L |
| 4645 | MYO5B   | 22841  | RAB11FIP2  | L |
| 4645 | MYO5B   | 57111  | RAB25      | L |
| 4646 | MYO6    | 10755  | GIPC1      | L |
| 4646 | MYO6    | 26994  | RNF11      | L |
| 4647 | MYO7A   | 10083  | USH1C      | L |
| 4647 | MYO7A   | 55591  | VEZATIN    | L |
| 4647 | MYO7A   | 64072  | CDH23      | L |
| 4649 | MYO9A   | 81488  | GRINL1A    | S |
| 4650 | MYO9B   | 10489  | LRRC41     | S |
| 4650 | MYO9B   | 25843  | PREI3      | S |
| 4651 | MYO10   | 8399   | PLA2G10    | S |
| 4651 | MYO10   | 8655   | DNCL1      | L |
| 4653 | MYOC    | 118427 | OLFM3      | L |
| 4654 | MYOD1   | 5710   | PSMD4      | L |
| 4654 | MYOD1   | 5925   | RB1        | L |
| 4654 | MYOD1   | 6095   | RORA       | L |
| 4654 | MYOD1   | 6256   | RXRA       | L |
| 4654 | MYOD1   | 6667   | SP1        | L |
| 4654 | MYOD1   | 6722   | SRF        | L |
| 4654 | MYOD1   | 6774   | STAT3      | L |
| 4654 | MYOD1   | 6925   | TCF4       | L |
| 4654 | MYOD1   | 7026   | NR2F2      | L |
| 4654 | MYOD1   | 7291   | TWIST1     | L |
| 4654 | MYOD1   | 8048   | CSRP3      | L |
| 4654 | MYOD1   | 9421   | HAND1      | L |
| 4654 | MYOD1   | 9612   | NCOR2      | L |

|      |          |        |          |   |
|------|----------|--------|----------|---|
| 4654 | MYOD1    | 10518  | CIB2     | L |
| 4654 | MYOD1    | 23462  | HEY1     | L |
| 4656 | MYOG     | 6667   | SP1      | L |
| 4656 | MYOG     | 6722   | SRF      | L |
| 4656 | MYOG     | 8048   | CSRP3    | L |
| 4659 | PPP1R12A | 5592   | PRKG1    | L |
| 4659 | PPP1R12A | 6093   | ROCK1    | L |
| 4660 | PPP1R12B | 5500   | PPP1CB   | L |
| 4661 | MYT1     | 5300   | PIN1     | L |
| 4666 | NACA     | 6908   | TBP      | L |
| 4666 | NACA     | 8772   | FADD     | L |
| 4666 | NACA     | 11244  | ZHX1     | S |
| 4666 | NACA     | 55791  | C1orf103 | S |
| 4666 | NACA     | 60492  | MDS025   | S |
| 4666 | NACA     | 65991  | FUNDC2   | S |
| 4666 | NACA     | 84966  | IGSF21   | S |
| 4666 | NACA     | 150572 | SMYD1    | L |
| 4670 | HNRPM    | 5829   | PXN      | L |
| 4670 | HNRPM    | 7916   | BAT2     | L |
| 4670 | HNRPM    | 10915  | TCERG1   | L |
| 4670 | HNRPM    | 55885  | LMO3     | R |
| 4670 | HNRPM    | 83759  | RBM30    | R |
| 4673 | NAP1L1   | 8850   | PCAF     | L |
| 4673 | NAP1L1   | 79187  | FSD1     | S |
| 4674 | NAP1L2   | 8850   | PCAF     | L |
| 4677 | NARS     | 5829   | PXN      | L |
| 4677 | NARS     | 27257  | LSM1     | L |
| 4678 | NASP     | 8355   | HIST1H3G | R |
| 4678 | NASP     | 8357   | HIST1H3H | R |
| 4678 | NASP     | 9706   | ULK2     | S |
| 4678 | NASP     | 51631  | LUC7L2   | S |
| 4678 | NASP     | 126961 | HIST2H3C | R |
| 4681 | NBL1     | 7917   | BAT3     | L |
| 4681 | NBL1     | 29979  | UBQLN1   | L |
| 4682 | NUBP1    | 4692   | NDN      | L |
| 4683 | NBN      | 7013   | TERF1    | L |
| 4683 | NBN      | 7014   | TERF2    | L |
| 4684 | NCAM1    | 6710   | SPTB     | L |
| 4684 | NCAM1    | 8128   | ST8SIA2  | L |
| 4686 | NCBP1    | 9810   | RNF40    | R |
| 4686 | NCBP1    | 22916  | NCBP2    | L |
| 4687 | NCF1     | 4688   | NCF2     | L |
| 4687 | NCF1     | 4790   | NFKB1    | L |
| 4687 | NCF1     | 5058   | PAK1     | L |
| 4687 | NCF1     | 9618   | TRAF4    | L |
| 4687 | NCF1     | 10657  | KHDRBS1  | L |
| 4687 | NCF1     | 114088 | TRIM9    | R |
| 4688 | NCF2     | 4689   | NCF4     | L |
| 4688 | NCF2     | 5879   | RAC1     | L |
| 4688 | NCF2     | 5880   | RAC2     | L |
| 4689 | NCF4     | 7295   | TXN      | L |
| 4690 | NCK1     | 4915   | NTRK2    | L |
| 4690 | NCK1     | 5058   | PAK1     | L |
| 4690 | NCK1     | 5062   | PAK2     | L |
| 4690 | NCK1     | 5159   | PDGFRB   | L |
| 4690 | NCK1     | 5586   | PKN2     | L |
| 4690 | NCK1     | 5829   | PXN      | L |
| 4690 | NCK1     | 5879   | RAC1     | L |
| 4690 | NCK1     | 5921   | RASA1    | L |
| 4690 | NCK1     | 6237   | RRAS     | L |
| 4690 | NCK1     | 6654   | SOS1     | L |
| 4690 | NCK1     | 7454   | WAS      | L |
| 4690 | NCK1     | 7456   | WASPIP   | L |
| 4690 | NCK1     | 8651   | SOCS1    | L |
| 4690 | NCK1     | 8892   | EIF2B2   | L |
| 4690 | NCK1     | 8894   | EIF2S2   | L |
| 4690 | NCK1     | 8976   | WASL     | L |

|      |        |       |          |   |
|------|--------|-------|----------|---|
| 4690 | NCK1   | 9046  | DOK2     | L |
| 4690 | NCK1   | 9448  | MAP4K4   | L |
| 4690 | NCK1   | 9564  | BCAR1    | L |
| 4690 | NCK1   | 10006 | ABI1     | L |
| 4690 | NCK1   | 10188 | TNK2     | L |
| 4690 | NCK1   | 10657 | KHDRBS1  | L |
| 4690 | NCK1   | 10787 | NCKAP1   | L |
| 4690 | NCK1   | 29110 | TBK1     | L |
| 4690 | NCK1   | 29760 | BLNK     | L |
| 4690 | NCK1   | 50488 | MINK1    | L |
| 4691 | NCL    | 4869  | NPM1     | L |
| 4691 | NCL    | 5590  | PRKCZ    | L |
| 4691 | NCL    | 6282  | S100A11  | L |
| 4691 | NCL    | 7015  | TERT     | L |
| 4691 | NCL    | 7150  | TOP1     | L |
| 4691 | NCL    | 7157  | TP53     | L |
| 4691 | NCL    | 10891 | PPARGC1A | L |
| 4691 | NCL    | 11033 | CENTA1   | L |
| 4691 | NCL    | 23075 | SWAP70   | L |
| 4692 | NDN    | 4804  | NGFR     | L |
| 4692 | NDN    | 4924  | NUCB1    | L |
| 4692 | NDN    | 4925  | NUCB2    | L |
| 4692 | NDN    | 7157  | TP53     | L |
| 4692 | NDN    | 64219 | PJA1     | L |
| 4698 | NDUFA5 | 4707  | NDUFB1   | R |
| 4698 | NDUFA5 | 9802  | DAZAP2   | R |
| 4698 | NDUFA5 | 11007 | DIPA     | R |
| 4700 | NDUFA6 | 7917  | BAT3     | S |
| 4700 | NDUFA6 | 9519  | TBPL1    | S |
| 4700 | NDUFA6 | 9551  | ATP5J2   | S |
| 4701 | NDUFA7 | 5564  | PRKAB1   | S |
| 4701 | NDUFA7 | 57519 | STARD9   | S |
| 4701 | NDUFA7 | 60528 | ELAC2    | S |
| 4703 | NEB    | 7111  | TMOD1    | L |
| 4703 | NEB    | 7273  | TTN      | L |
| 4703 | NEB    | 84665 | MYPN     | L |
| 4714 | NDUFB8 | 5217  | PFN2     | S |
| 4714 | NDUFB8 | 8891  | EIF2B3   | S |
| 4714 | NDUFB8 | 11040 | PIM2     | S |
| 4715 | NDUFB9 | 6457  | SH3GL3   | S |
| 4715 | NDUFB9 | 8518  | IKBKAP   | S |
| 4715 | NDUFB9 | 9001  | HAP1     | S |
| 4715 | NDUFB9 | 9638  | FEZ1     | S |
| 4715 | NDUFB9 | 10989 | IMMT     | S |
| 4729 | NDUFV2 | 10524 | HTATIP   | S |
| 4731 | NDUFV3 | 9796  | PHYHIP   | S |
| 4733 | DRG1   | 51389 | RWDD1    | R |
| 4734 | NEDD4  | 4778  | NFE2     | L |
| 4734 | NEDD4  | 6142  | RPL18A   | S |
| 4734 | NEDD4  | 6337  | SCNN1A   | L |
| 4734 | NEDD4  | 6338  | SCNN1B   | L |
| 4734 | NEDD4  | 6340  | SCNN1G   | L |
| 4734 | NEDD4  | 6446  | SGK      | L |
| 4734 | NEDD4  | 7322  | UBE2D2   | L |
| 4734 | NEDD4  | 7323  | UBE2D3   | L |
| 4734 | NEDD4  | 7324  | UBE2E1   | L |
| 4734 | NEDD4  | 7332  | UBE2L3   | L |
| 4734 | NEDD4  | 7805  | LAPTM5   | L |
| 4734 | NEDD4  | 9146  | HGS      | L |
| 4734 | NEDD4  | 9802  | DAZAP2   | L |
| 4734 | NEDD4  | 23138 | N4BP3    | L |
| 4734 | NEDD4  | 26994 | RNF11    | L |
| 4734 | NEDD4  | 30011 | SH3KBP1  | L |
| 4734 | NEDD4  | 55728 | N4BP2    | L |
| 4734 | NEDD4  | 56937 | TMEPAI   | L |
| 4735 | SEPT2  | 5413  | SEPT5    | L |
| 4735 | SEPT2  | 6804  | STX1A    | L |

|      |         |       |          |   |
|------|---------|-------|----------|---|
| 4735 | SEPT2   | 9802  | DAZAP2   | R |
| 4735 | SEPT2   | 10801 | SEPT9    | L |
| 4735 | SEPT2   | 23157 | SEPT6    | R |
| 4738 | NEDD8   | 5710  | PSMD4    | L |
| 4738 | NEDD8   | 7345  | UCHL1    | S |
| 4738 | NEDD8   | 7347  | UCHL3    | L |
| 4738 | NEDD8   | 8452  | CUL3     | L |
| 4738 | NEDD8   | 9039  | UBE1C    | L |
| 4738 | NEDD8   | 9040  | UBE2M    | L |
| 4738 | NEDD8   | 10054 | UBA2     | L |
| 4738 | NEDD8   | 51667 | NYREN18  | L |
| 4739 | NEDD9   | 51343 | FZR1     | L |
| 4739 | NEDD9   | 83737 | ITCH     | L |
| 4741 | NEF3    | 4744  | NEFH     | L |
| 4741 | NEF3    | 6812  | STXBP1   | L |
| 4744 | NEFH    | 4747  | NEFL     | L |
| 4744 | NEFH    | 5585  | PKN1     | L |
| 4744 | NEFH    | 6812  | STXBP1   | L |
| 4747 | NEFL    | 5585  | PKN1     | L |
| 4747 | NEFL    | 6709  | SPTAN1   | L |
| 4747 | NEFL    | 7248  | TSC1     | L |
| 4747 | NEFL    | 55755 | CDK5RAP2 | S |
| 4750 | NEK1    | 7158  | TP53BP1  | L |
| 4750 | NEK1    | 7249  | TSC2     | L |
| 4750 | NEK1    | 8727  | CTNNAL1  | L |
| 4750 | NEK1    | 54512 | EXOSC4   | L |
| 4750 | NEK1    | 59348 | ZNF350   | L |
| 4751 | NEK2    | 5504  | PPP1R2   | L |
| 4751 | NEK2    | 5594  | MAPK1    | L |
| 4751 | NEK2    | 10403 | KNTC2    | L |
| 4751 | NEK2    | 11190 | CEP2     | L |
| 4756 | NEO1    | 9423  | NTN1     | L |
| 4758 | NEU1    | 5476  | PPGB     | L |
| 4760 | NEUROD1 | 5307  | PITX1    | L |
| 4760 | NEUROD1 | 6239  | RREB1    | L |
| 4760 | NEUROD1 | 9001  | HAP1     | L |
| 4761 | NEUROD2 | 5585  | PKN1     | L |
| 4763 | NF1     | 7266  | DNAJC7   | L |
| 4771 | NF2     | 5829  | PXN      | L |
| 4771 | NF2     | 6386  | SDCBP    | L |
| 4771 | NF2     | 6711  | SPTBN1   | L |
| 4771 | NF2     | 6895  | TARBP2   | L |
| 4771 | NF2     | 7248  | TSC1     | L |
| 4771 | NF2     | 7430  | VIL2     | L |
| 4771 | NF2     | 7514  | XPO1     | L |
| 4771 | NF2     | 9146  | HGS      | L |
| 4771 | NF2     | 9368  | SLC9A3R1 | L |
| 4772 | NFATC1  | 5292  | PIM1     | L |
| 4773 | NFATC2  | 5300  | PIN1     | L |
| 4773 | NFATC2  | 5590  | PRKCZ    | L |
| 4773 | NFATC2  | 7431  | VIM      | S |
| 4773 | NFATC2  | 7534  | YWHAZ    | L |
| 4773 | NFATC2  | 10971 | YWHAQ    | L |
| 4773 | NFATC2  | 51003 | MED31    | S |
| 4776 | NFATC4  | 7534  | YWHAZ    | L |
| 4776 | NFATC4  | 10971 | YWHAQ    | L |
| 4778 | NFE2    | 4780  | NFE2L2   | L |
| 4778 | NFE2    | 7975  | MAFK     | L |
| 4778 | NFE2    | 9586  | CREB5    | L |
| 4778 | NFE2    | 9603  | NFE2L3   | L |
| 4778 | NFE2    | 9796  | PHYHIP   | S |
| 4778 | NFE2    | 10413 | YAP1     | L |
| 4778 | NFE2    | 58487 | ZF       | L |
| 4778 | NFE2    | 90993 | CREB3L1  | L |
| 4779 | NFE2L1  | 7975  | MAFK     | L |
| 4779 | NFE2L1  | 9586  | CREB5    | L |
| 4779 | NFE2L1  | 9935  | MAFB     | L |

|      |        |        |           |   |
|------|--------|--------|-----------|---|
| 4779 | NFE2L1 | 23764  | MAFF      | L |
| 4779 | NFE2L1 | 58487  | ZF        | L |
| 4780 | NFE2L2 | 5468   | PPARG     | L |
| 4780 | NFE2L2 | 7975   | MAFK      | L |
| 4780 | NFE2L2 | 9451   | EIF2AK3   | L |
| 4780 | NFE2L2 | 11243  | PMF1      | L |
| 4780 | NFE2L2 | 23764  | MAFF      | L |
| 4781 | NFIB   | 4782   | NFIC      | L |
| 4781 | NFIB   | 4784   | NFIX      | L |
| 4782 | NFIC   | 23174  | ZCCHC14   | R |
| 4782 | NFIC   | 55888  | ZNF167    | R |
| 4782 | NFIC   | 84076  | TKTL2     | R |
| 4782 | NFIC   | 84298  | MGC14817  | R |
| 4782 | NFIC   | 89882  | NYD-SP25  | R |
| 4783 | NFIL3  | 10488  | CREB3     | L |
| 4783 | NFIL3  | 10538  | BATF      | L |
| 4783 | NFIL3  | 55509  | SNFT      | L |
| 4783 | NFIL3  | 84699  | CREB3L3   | L |
| 4783 | NFIL3  | 90993  | CREB3L1   | L |
| 4784 | NFIX   | 5989   | RFX1      | L |
| 4784 | NFIX   | 6497   | SKI       | L |
| 4784 | NFIX   | 8544   | PIR       | L |
| 4790 | NFKB1  | 4792   | NFKBIA    | L |
| 4790 | NFKB1  | 4794   | NFKBIE    | L |
| 4790 | NFKB1  | 4798   | NFRKB     | L |
| 4790 | NFKB1  | 4851   | NOTCH1    | L |
| 4790 | NFKB1  | 5531   | PPP4C     | L |
| 4790 | NFKB1  | 5591   | PRKDC     | L |
| 4790 | NFKB1  | 6256   | RXRA      | L |
| 4790 | NFKB1  | 6688   | SPI1      | L |
| 4790 | NFKB1  | 6774   | STAT3     | L |
| 4790 | NFKB1  | 6778   | STAT6     | L |
| 4790 | NFKB1  | 7295   | TXN       | L |
| 4790 | NFKB1  | 8091   | HMGA2     | L |
| 4790 | NFKB1  | 8600   | TNFSF11   | L |
| 4790 | NFKB1  | 8648   | NCOA1     | L |
| 4790 | NFKB1  | 9325   | TRIP4     | L |
| 4790 | NFKB1  | 9612   | NCOR2     | L |
| 4790 | NFKB1  | 9908   | G3BP2     | L |
| 4790 | NFKB1  | 23421  | ITGB3BP   | L |
| 4790 | NFKB1  | 51773  | HBXAP     | L |
| 4790 | NFKB1  | 64332  | NFKBIZ    | L |
| 4790 | NFKB1  | 136319 | MTPN      | L |
| 4790 | NFKB1  | 222643 | UNC5CL    | L |
| 4791 | NFKB2  | 4794   | NFKBIE    | L |
| 4791 | NFKB2  | 5966   | REL       | L |
| 4791 | NFKB2  | 5970   | RELA      | L |
| 4791 | NFKB2  | 5971   | RELB      | L |
| 4791 | NFKB2  | 8945   | BTRC      | L |
| 4791 | NFKB2  | 9020   | MAP3K14   | L |
| 4791 | NFKB2  | 55922  | NKRF      | L |
| 4792 | NFKBIA | 5295   | PIK3R1    | L |
| 4792 | NFKBIA | 5783   | PTPN13    | L |
| 4792 | NFKBIA | 6195   | RPS6KA1   | L |
| 4792 | NFKBIA | 7157   | TP53      | L |
| 4792 | NFKBIA | 7278   | TUBA2     | L |
| 4792 | NFKBIA | 7415   | VCP       | L |
| 4792 | NFKBIA | 8600   | TNFSF11   | L |
| 4792 | NFKBIA | 8655   | DNCL1     | L |
| 4792 | NFKBIA | 8945   | BTRC      | L |
| 4792 | NFKBIA | 9883   | POM121    | R |
| 4792 | NFKBIA | 9908   | G3BP2     | L |
| 4792 | NFKBIA | 10376  | K-ALPHA-1 | L |
| 4792 | NFKBIA | 10477  | UBE2E3    | L |
| 4792 | NFKBIA | 23085  | RAB6IP2   | L |
| 4792 | NFKBIA | 23291  | FBXW11    | L |
| 4792 | NFKBIA | 219541 | MED19     | S |

|      |        |        |          |    |
|------|--------|--------|----------|----|
| 4792 | NFKBIA | 387082 | SUMO4    | L  |
| 4793 | NFKBIB | 5970   | RELA     | L  |
| 4793 | NFKBIB | 6256   | RXRA     | L  |
| 4793 | NFKBIB | 8945   | BTRC     | L  |
| 4794 | NFKBIE | 5966   | REL      | L  |
| 4800 | NFYA   | 5451   | POU2F1   | L  |
| 4800 | NFYA   | 6667   | SP1      | L  |
| 4800 | NFYA   | 10513  | APPBP2   | R  |
| 4800 | NFYA   | 11244  | ZHX1     | L  |
| 4800 | NFYA   | 23051  | ZHX3     | L  |
| 4801 | NFYB   | 4802   | NFYC     | L  |
| 4801 | NFYB   | 4904   | YBX1     | L  |
| 4801 | NFYB   | 6900   | CNTN2    | L  |
| 4801 | NFYB   | 6908   | TBP      | L  |
| 4801 | NFYB   | 7161   | TP73     | L  |
| 4801 | NFYB   | 8531   | CSDA     | L  |
| 4801 | NFYB   | 10153  | CEBPZ    | L  |
| 4801 | NFYB   | 10589  | DRAP1    | R  |
| 4803 | NGFB   | 4804   | NGFR     | L  |
| 4803 | NGFB   | 4914   | NTRK1    | L  |
| 4803 | NGFB   | 4919   | ROR1     | L  |
| 4803 | NGFB   | 5340   | PLG      | L  |
| 4803 | NGFB   | 6272   | SORT1    | L  |
| 4803 | NGFB   | 22986  | SORCS3   | L  |
| 4804 | NGFR   | 4909   | NTF5     | L  |
| 4804 | NGFR   | 4914   | NTRK1    | L  |
| 4804 | NGFR   | 4916   | NTRK3    | L  |
| 4804 | NGFR   | 5567   | PRKACB   | L  |
| 4804 | NGFR   | 6434   | SFRS10   | L  |
| 4804 | NGFR   | 6464   | SHC1     | L  |
| 4804 | NGFR   | 6624   | FSCN1    | L  |
| 4804 | NGFR   | 7186   | TRAF2    | L  |
| 4804 | NGFR   | 7189   | TRAF6    | L  |
| 4804 | NGFR   | 7314   | UBB      | L  |
| 4804 | NGFR   | 9500   | MAGED1   | L  |
| 4804 | NGFR   | 9618   | TRAF4    | L  |
| 4807 | NHLH1  | 8048   | CSRP3    | L  |
| 4807 | NHLH1  | 8543   | LMO4     | L  |
| 4809 | NHP2L1 | 5884   | RAD17    | L  |
| 4809 | NHP2L1 | 8241   | RBM10    | S  |
| 4809 | NHP2L1 | 23649  | POLA2    | S  |
| 4809 | NHP2L1 | 55791  | C1orf103 | S  |
| 4811 | NID1   | 5328   | PLAU     | L  |
| 4811 | NID1   | 5549   | PRELP    | L  |
| 4811 | NID1   | 5792   | PTPRF    | L  |
| 4811 | NID1   | 6498   | SKIL     | L  |
| 4811 | NID1   | 90070  | LACRT    | L  |
| 4817 | NIT1   | 9372   | ZFYVE9   | L  |
| 4824 | NKX3-1 | 6722   | SRF      | L  |
| 4824 | NKX3-1 | 28996  | HIPK2    | L  |
| 4828 | NMB    | 4829   | NMBR     | L  |
| 4830 | NME1   | 4832   | NME3     | RL |
| 4830 | NME1   | 4833   | NME4     | R  |
| 4830 | NME1   | 6095   | RORA     | L  |
| 4830 | NME1   | 6096   | RORB     | L  |
| 4830 | NME1   | 6236   | RRAD     | L  |
| 4830 | NME1   | 6418   | SET      | L  |
| 4830 | NME1   | 6790   | STK6     | L  |
| 4830 | NME1   | 7013   | TERF1    | L  |
| 4830 | NME1   | 7074   | TIAM1    | L  |
| 4830 | NME1   | 9533   | POLR1C   | R  |
| 4830 | NME1   | 26003  | GORASP2  | R  |
| 4830 | NME1   | 55093  | C8orf32  | R  |
| 4831 | NME2   | 4832   | NME3     | SL |
| 4831 | NME2   | 6095   | RORA     | L  |
| 4831 | NME2   | 7013   | TERF1    | L  |
| 4831 | NME2   | 7414   | VCL      | L  |



|      |        |        |               |   |
|------|--------|--------|---------------|---|
| 4831 | NME2   | 7431   | VIM           | L |
| 4831 | NME2   | 11214  | AKAP13        | L |
| 4832 | NME3   | 6449   | SGTA          | R |
| 4833 | NME4   | 9319   | TRIP13        | R |
| 4835 | NQO2   | 26003  | GORASP2       | R |
| 4839 | NOL1   | 5795   | PTPRJ         | L |
| 4839 | NOL1   | 10445  | MCRS1         | L |
| 4841 | NONO   | 5111   | PCNA          | L |
| 4841 | NONO   | 5300   | PIN1          | R |
| 4841 | NONO   | 5430   | POLR2A        | L |
| 4841 | NONO   | 5829   | PXN           | L |
| 4841 | NONO   | 6421   | SFPQ          | L |
| 4841 | NONO   | 6688   | SPI1          | L |
| 4841 | NONO   | 7414   | VCL           | L |
| 4841 | NONO   | 8379   | MAD1L1        | R |
| 4841 | NONO   | 9513   | FXR2          | R |
| 4841 | NONO   | 30834  | ZNRD1         | R |
| 4841 | NONO   | 55269  | PSPC1         | S |
| 4841 | NONO   | 79666  | PLEKHF2       | R |
| 4842 | NOS1   | 5777   | PTPN6         | L |
| 4842 | NOS1   | 5798   | PTPRN         | L |
| 4842 | NOS1   | 6640   | SNTA1         | L |
| 4842 | NOS1   | 8655   | DNCL1         | L |
| 4842 | NOS1   | 51655  | RASD1         | L |
| 4843 | NOS2A  | 5879   | RAC1          | L |
| 4843 | NOS2A  | 9368   | SLC9A3R1      | L |
| 4846 | NOS3   | 6667   | SP1           | L |
| 4846 | NOS3   | 115677 | NOSTRIN       | L |
| 4848 | CNOT2  | 4849   | CNOT3         | R |
| 4848 | CNOT2  | 23019  | CNOT1         | L |
| 4849 | CNOT3  | 9337   | CNOT8         | L |
| 4850 | CNOT4  | 9337   | CNOT8         | L |
| 4850 | CNOT4  | 23019  | CNOT1         | L |
| 4851 | NOTCH1 | 4856   | NOV           | L |
| 4851 | NOTCH1 | 5294   | PIK3CG        | L |
| 4851 | NOTCH1 | 5663   | PSEN1         | L |
| 4851 | NOTCH1 | 5970   | RELA          | L |
| 4851 | NOTCH1 | 7528   | YY1           | L |
| 4851 | NOTCH1 | 8650   | NUMB          | L |
| 4851 | NOTCH1 | 8850   | PCAF          | L |
| 4851 | NOTCH1 | 9794   | MAML1         | L |
| 4851 | NOTCH1 | 51176  | LEF1          | L |
| 4851 | NOTCH1 | 54567  | DLL4          | L |
| 4851 | NOTCH1 | 55294  | FBXW7         | L |
| 4851 | NOTCH1 | 83737  | ITCH          | L |
| 4852 | NPY    | 4886   | NPY1R         | L |
| 4852 | NPY    | 4887   | NPY2R         | L |
| 4852 | NPY    | 4889   | NPY5R         | L |
| 4852 | NPY    | 5367   | PMCH          | L |
| 4852 | NPY    | 5540   | PPYR1         | L |
| 4852 | NPY    | 8620   | NPFF          | L |
| 4852 | NPY    | 51738  | GHRL          | L |
| 4853 | NOTCH2 | 9794   | MAML1         | L |
| 4853 | NOTCH2 | 28514  | DLL1          | L |
| 4854 | NOTCH3 | 8850   | PCAF          | L |
| 4854 | NOTCH3 | 9794   | MAML1         | L |
| 4854 | NOTCH3 | 22938  | SNW1          | L |
| 4854 | NOTCH3 | 28514  | DLL1          | L |
| 4855 | NOTCH4 | 54567  | DLL4          | L |
| 4855 | NOTCH4 | 55294  | FBXW7         | L |
| 4857 | NOVA1  | 6601   | SMARCC2       | S |
| 4860 | NP     | 7157   | TP53          | S |
| 4860 | NP     | 11244  | ZHX1          | S |
| 4860 | NP     | 55791  | C1orf103      | S |
| 4860 | NP     | 60492  | MDS025        | S |
| 4860 | NP     | 83988  | NCALD         | L |
| 4860 | NP     | 84060  | DKFZP564O0523 | S |

|      |       |        |          |   |
|------|-------|--------|----------|---|
| 4862 | NPAS2 | 6256   | RXRA     | L |
| 4862 | NPAS2 | 8202   | NCOA3    | L |
| 4863 | NPAT  | 5451   | POU2F1   | L |
| 4867 | NPHP1 | 7145   | TNS1     | L |
| 4867 | NPHP1 | 7280   | TUBB2    | L |
| 4867 | NPHP1 | 9564   | BCAR1    | L |
| 4867 | NPHP1 | 27031  | NPHP3    | L |
| 4867 | NPHP1 | 27130  | INVS     | L |
| 4867 | NPHP1 | 261734 | NPHP4    | L |
| 4868 | NPHS1 | 6714   | SRC      | L |
| 4868 | NPHS1 | 7525   | YES1     | L |
| 4868 | NPHS1 | 7827   | NPHS2    | L |
| 4868 | NPHS1 | 8573   | CASK     | L |
| 4868 | NPHS1 | 23607  | CD2AP    | L |
| 4868 | NPHS1 | 55243  | KIRREL   | L |
| 4869 | NPM1  | 8290   | HIST3H3  | L |
| 4869 | NPM1  | 9464   | HAND2    | L |
| 4869 | NPM1  | 10915  | TCERG1   | L |
| 4869 | NPM1  | 23075  | SWAP70   | L |
| 4878 | NPPA  | 4881   | NPR1     | L |
| 4878 | NPPA  | 4883   | NPR3     | L |
| 4879 | NPPB  | 4881   | NPR1     | L |
| 4879 | NPPB  | 4883   | NPR3     | L |
| 4880 | NPPC  | 4882   | NPR2     | L |
| 4880 | NPPC  | 4883   | NPR3     | L |
| 4881 | NPR1  | 5592   | PRKG1    | L |
| 4881 | NPR1  | 55729  | ATF7IP   | L |
| 4886 | NPY1R | 51690  | LSM7     | L |
| 4887 | NPY2R | 5697   | PYY      | L |
| 4887 | NPY2R | 6002   | RGS12    | L |
| 4892 | NRAP  | 7094   | TLN1     | L |
| 4892 | NRAP  | 7414   | VCL      | L |
| 4893 | NRAS  | 5910   | RAP1GDS1 | L |
| 4893 | NRAS  | 8036   | SHOC2    | L |
| 4893 | NRAS  | 10235  | RASGRP2  | L |
| 4893 | NRAS  | 51196  | PLCE1    | S |
| 4897 | NRCAM | 5787   | PTPRB    | L |
| 4897 | NRCAM | 6900   | CNTN2    | L |
| 4899 | NRF1  | 7975   | MAFK     | L |
| 4899 | NRF1  | 8655   | DNCL1    | L |
| 4899 | NRF1  | 10891  | PPARGC1A | L |
| 4899 | NRF1  | 23764  | MAFF     | L |
| 4901 | NRL   | 84922  | FLJ14768 | L |
| 4902 | NRTN  | 5979   | RET      | L |
| 4904 | YBX1  | 5111   | PCNA     | L |
| 4904 | YBX1  | 5813   | PURA     | L |
| 4904 | YBX1  | 5829   | PXN      | L |
| 4904 | YBX1  | 7020   | TFAP2A   | L |
| 4904 | YBX1  | 7094   | TLN1     | L |
| 4904 | YBX1  | 7157   | TP53     | L |
| 4904 | YBX1  | 8683   | SFRS9    | L |
| 4904 | YBX1  | 10664  | CTCF     | L |
| 4905 | NSF   | 6176   | RPLP1    | S |
| 4905 | NSF   | 6804   | STX1A    | L |
| 4905 | NSF   | 6810   | STX4A    | L |
| 4905 | NSF   | 8615   | VDP      | L |
| 4905 | NSF   | 9482   | STX8     | L |
| 4905 | NSF   | 9527   | GOSR1    | L |
| 4905 | NSF   | 11161  | C14orf1  | S |
| 4905 | NSF   | 11337  | GABARAP  | L |
| 4905 | NSF   | 51631  | LUC7L2   | S |
| 4905 | NSF   | 57562  | KIAA1377 | S |
| 4905 | NSF   | 65991  | FUNDC2   | S |
| 4908 | NTF3  | 4915   | NTRK2    | L |
| 4908 | NTF3  | 4916   | NTRK3    | L |
| 4909 | NTF5  | 4915   | NTRK2    | L |
| 4914 | NTRK1 | 5770   | PTPN1    | L |

|      |           |        |                 |   |
|------|-----------|--------|-----------------|---|
| 4914 | NTRK1     | 6464   | SHC1            | L |
| 4914 | NTRK1     | 10755  | GIPC1           | L |
| 4914 | NTRK1     | 10818  | FRS2            | L |
| 4914 | NTRK1     | 23623  | RUSC1           | L |
| 4915 | NTRK2     | 5770   | PTPN1           | L |
| 4915 | NTRK2     | 8440   | NCK2            | L |
| 4915 | NTRK2     | 8655   | DNCL1           | L |
| 4915 | NTRK2     | 8878   | SQSTM1          | L |
| 4915 | NTRK2     | 10755  | GIPC1           | L |
| 4916 | NTRK3     | 5335   | PLCG1           | L |
| 4916 | NTRK3     | 5594   | MAPK1           | L |
| 4916 | NTRK3     | 5770   | PTPN1           | L |
| 4916 | NTRK3     | 6464   | SHC1            | L |
| 4916 | NTRK3     | 8878   | SQSTM1          | L |
| 4916 | NTRK3     | 27018  | NGFRAP1         | L |
| 4920 | ROR2      | 9500   | MAGED1          | L |
| 4921 | DDR2      | 6464   | SHC1            | L |
| 4921 | DDR2      | 6714   | SRC             | L |
| 4922 | NTS       | 4923   | NTSR1           | L |
| 4922 | NTS       | 6272   | SORT1           | L |
| 4922 | NTS       | 23620  | NTSR2           | L |
| 4923 | NTSR1     | 7189   | TRAF6           | L |
| 4924 | NUCB1     | 5743   | PTGS2           | L |
| 4926 | NUMA1     | 5292   | PIM1            | L |
| 4926 | NUMA1     | 5885   | RAD21           | L |
| 4926 | NUMA1     | 8089   | YEATS4          | L |
| 4926 | NUMA1     | 8243   | SMC1L1          | L |
| 4926 | NUMA1     | 8658   | TNKS            | L |
| 4926 | NUMA1     | 10121  | ACTR1A          | L |
| 4926 | NUMA1     | 29899  | GPSM2           | L |
| 4927 | NUP88     | 4928   | NUP98           | L |
| 4927 | NUP88     | 8021   | NUP214          | L |
| 4928 | NUP98     | 7175   | TPR             | L |
| 4928 | NUP98     | 8021   | NUP214          | L |
| 4928 | NUP98     | 10482  | NXF1            | L |
| 4928 | NUP98     | 23636  | NUP62           | L |
| 4928 | NUP98     | 55746  | NUP133          | L |
| 4929 | NR4A2     | 6256   | RXRA            | L |
| 4929 | NR4A2     | 6257   | RXRB            | L |
| 4935 | GPR143    | 8801   | SUCLG2          | L |
| 4942 | OAT       | 54978  | C2orf18         | S |
| 4946 | OAZ1      | 4953   | ODC1            | L |
| 4950 | OCLN      | 7082   | TJP1            | L |
| 4950 | OCLN      | 7525   | YES1            | L |
| 4950 | OCLN      | 9414   | TJP2            | L |
| 4950 | OCLN      | 83737  | ITCH            | L |
| 4952 | OCRL      | 9950   | GOLGA5          | L |
| 4956 | ODF1      | 4957   | ODF2            | L |
| 4956 | ODF1      | 6676   | SPAG4           | L |
| 4956 | ODF1      | 7205   | TRIP6           | L |
| 4956 | ODF1      | 10615  | SPAG5           | L |
| 4967 | OGDH      | 5359   | PLSCR1          | R |
| 4968 | OGG1      | 5578   | PRKCA           | L |
| 4968 | OGG1      | 7515   | XRCC1           | L |
| 4982 | TNFRSF11B | 8600   | TNFSF11         | L |
| 4982 | TNFRSF11B | 8743   | TNFSF10         | L |
| 4982 | TNFRSF11B | 407977 | TNFSF12-TNFSF13 | L |
| 4983 | OPHN1     | 5879   | RAC1            | L |
| 4985 | OPRD1     | 4986   | OPRK1           | L |
| 4985 | OPRD1     | 4988   | OPRM1           | L |
| 4985 | OPRD1     | 9737   | GPRASP1         | L |
| 4986 | OPRK1     | 9368   | SLC9A3R1        | L |
| 4987 | OPRL1     | 5368   | PNOC            | L |
| 4987 | OPRL1     | 9630   | GNA14           | L |
| 4987 | OPRL1     | 10287  | RGS19           | L |
| 4988 | OPRM1     | 5338   | PLD2            | L |
| 4988 | OPRM1     | 9737   | GPRASP1         | L |

|      |          |        |           |   |
|------|----------|--------|-----------|---|
| 4990 | SIX6     | 7088   | TLE1      | L |
| 4998 | ORC1L    | 4999   | ORC2L     | L |
| 4998 | ORC1L    | 5000   | ORC4L     | L |
| 4998 | ORC1L    | 5001   | ORC5L     | L |
| 4998 | ORC1L    | 6502   | SKP2      | L |
| 4998 | ORC1L    | 7514   | XPO1      | L |
| 4998 | ORC1L    | 8317   | CDC7      | L |
| 4998 | ORC1L    | 11143  | MYST2     | L |
| 4998 | ORC1L    | 23595  | ORC3L     | L |
| 4998 | ORC1L    | 81620  | CDT1      | L |
| 4998 | ORC1L    | 115106 | CCDC5     | L |
| 4999 | ORC2L    | 5000   | ORC4L     | L |
| 4999 | ORC2L    | 5001   | ORC5L     | L |
| 4999 | ORC2L    | 6117   | RPA1      | L |
| 4999 | ORC2L    | 6118   | RPA2      | L |
| 4999 | ORC2L    | 7520   | XRCC5     | L |
| 4999 | ORC2L    | 10926  | ASK       | L |
| 4999 | ORC2L    | 23594  | ORC6L     | L |
| 4999 | ORC2L    | 23595  | ORC3L     | L |
| 4999 | ORC2L    | 55388  | MCM10     | L |
| 4999 | ORC2L    | 81620  | CDT1      | L |
| 4999 | ORC2L    | 115106 | CCDC5     | L |
| 5000 | ORC4L    | 5001   | ORC5L     | L |
| 5000 | ORC4L    | 23594  | ORC6L     | L |
| 5000 | ORC4L    | 23595  | ORC3L     | L |
| 5000 | ORC4L    | 55388  | MCM10     | L |
| 5001 | ORC5L    | 8317   | CDC7      | L |
| 5001 | ORC5L    | 8318   | CDC45L    | L |
| 5001 | ORC5L    | 23595  | ORC3L     | L |
| 5004 | ORM1     | 5054   | SERPINE1  | L |
| 5008 | OSM      | 9180   | OSMR      | L |
| 5009 | OTC      | 9804   | TOMM20    | L |
| 5013 | OTX1     | 11030  | RBPM5     | R |
| 5013 | OTX1     | 26511  | CHIC2     | R |
| 5013 | OTX1     | 83755  | KRTAP4-12 | R |
| 5016 | OVGP1    | 6779   | STATH     | L |
| 5016 | OVGP1    | 10156  | RASA4     | S |
| 5027 | P2RX7    | 6840   | SVIL      | L |
| 5028 | P2RY1    | 9351   | SLC9A3R2  | L |
| 5028 | P2RY1    | 9368   | SLC9A3R1  | L |
| 5033 | P4HA1    | 5829   | PXN       | L |
| 5034 | P4HB     | 5764   | PTN       | S |
| 5034 | P4HB     | 5829   | PXN       | L |
| 5034 | P4HB     | 7038   | TG        | L |
| 5034 | P4HB     | 9638   | FEZ1      | S |
| 5034 | P4HB     | 29979  | UBQLN1    | L |
| 5036 | PA2G4    | 5925   | RB1       | L |
| 5037 | PBP      | 5578   | PRKCA     | L |
| 5037 | PBP      | 5580   | PRKCD     | L |
| 5037 | PBP      | 5594   | MAPK1     | L |
| 5037 | PBP      | 5604   | MAP2K1    | L |
| 5037 | PBP      | 5894   | RAF1      | L |
| 5037 | PBP      | 6885   | MAP3K7    | L |
| 5037 | PBP      | 8614   | STC2      | S |
| 5037 | PBP      | 84246  | TRG20     | S |
| 5045 | FURIN    | 5271   | SERPINB8  | L |
| 5045 | FURIN    | 55690  | PACS1     | L |
| 5047 | PAEP     | 5788   | PTPRC     | L |
| 5047 | PAEP     | 7324   | UBE2E1    | S |
| 5047 | PAEP     | 10980  | COPS6     | S |
| 5047 | PAEP     | 55791  | C1orf103  | S |
| 5047 | PAEP     | 84966  | IGSF21    | S |
| 5048 | PAFAH1B1 | 5049   | PAFAH1B2  | L |
| 5048 | PAFAH1B1 | 5050   | PAFAH1B3  | L |
| 5048 | PAFAH1B1 | 6249   | RSN       | L |
| 5048 | PAFAH1B1 | 10808  | HSPH1     | L |
| 5048 | PAFAH1B1 | 27019  | DNAI1     | L |

|      |          |        |               |   |
|------|----------|--------|---------------|---|
| 5048 | PAFAH1B1 | 81565  | NDEL1         | L |
| 5049 | PAFAH1B2 | 5050   | PAFAH1B3      | R |
| 5049 | PAFAH1B2 | 5071   | PARK2         | S |
| 5049 | PAFAH1B2 | 6175   | RPLP0         | S |
| 5049 | PAFAH1B2 | 6503   | SLA           | S |
| 5049 | PAFAH1B2 | 7203   | CCT3          | S |
| 5049 | PAFAH1B2 | 10073  | RNUT1         | S |
| 5049 | PAFAH1B2 | 22985  | ACIN1         | S |
| 5049 | PAFAH1B2 | 25842  | ASF1A         | S |
| 5049 | PAFAH1B2 | 54776  | PPP1R12C      | S |
| 5049 | PAFAH1B2 | 54984  | PINX1         | S |
| 5049 | PAFAH1B2 | 57455  | REXO1         | S |
| 5049 | PAFAH1B2 | 92609  | TIMM50        | S |
| 5050 | PAFAH1B3 | 7088   | TLE1          | S |
| 5050 | PAFAH1B3 | 7157   | TP53          | S |
| 5050 | PAFAH1B3 | 7280   | TUBB2         | S |
| 5050 | PAFAH1B3 | 7704   | ZBTB16        | S |
| 5050 | PAFAH1B3 | 9094   | UNC119        | S |
| 5050 | PAFAH1B3 | 9842   | PLEKHM1       | S |
| 5050 | PAFAH1B3 | 9869   | SETDB1        | S |
| 5050 | PAFAH1B3 | 10980  | COPS6         | S |
| 5050 | PAFAH1B3 | 11161  | C14orf1       | S |
| 5050 | PAFAH1B3 | 11244  | ZHX1          | S |
| 5050 | PAFAH1B3 | 27111  | SDCBP2        | R |
| 5050 | PAFAH1B3 | 29117  | BRD7          | S |
| 5050 | PAFAH1B3 | 51003  | MED31         | S |
| 5050 | PAFAH1B3 | 55791  | C1orf103      | S |
| 5050 | PAFAH1B3 | 57062  | DDX24         | S |
| 5050 | PAFAH1B3 | 60492  | MDS025        | S |
| 5050 | PAFAH1B3 | 84060  | DKFZP564O0523 | S |
| 5050 | PAFAH1B3 | 84708  | LNX           | R |
| 5050 | PAFAH1B3 | 84966  | IGSF21        | S |
| 5050 | PAFAH1B3 | 91782  | CHMP7         | R |
| 5050 | PAFAH1B3 | 222019 | (null)        | S |
| 5052 | PRDX1    | 5829   | PXN           | L |
| 5052 | PRDX1    | 10549  | PRDX4         | L |
| 5052 | PRDX1    | 27244  | SESN1         | L |
| 5054 | SERPINE1 | 5327   | PLAT          | L |
| 5054 | SERPINE1 | 5340   | PLG           | L |
| 5054 | SERPINE1 | 7056   | THBD          | L |
| 5054 | SERPINE1 | 7448   | VTN           | L |
| 5055 | SERPINB2 | 5328   | PLAU          | L |
| 5055 | SERPINB2 | 5925   | RB1           | L |
| 5058 | PAK1     | 5335   | PLCG1         | L |
| 5058 | PAK1     | 5829   | PXN           | L |
| 5058 | PAK1     | 5879   | RAC1          | L |
| 5058 | PAK1     | 5894   | RAF1          | L |
| 5058 | PAK1     | 8440   | NCK2          | L |
| 5058 | PAK1     | 8851   | CDK5R1        | L |
| 5058 | PAK1     | 8874   | ARHGEF7       | L |
| 5058 | PAK1     | 9146   | HGS           | L |
| 5058 | PAK1     | 9459   | ARHGEF6       | L |
| 5058 | PAK1     | 9647   | PPM1F         | L |
| 5058 | PAK1     | 10095  | ARPC1B        | L |
| 5058 | PAK1     | 51225  | ABI3          | L |
| 5058 | PAK1     | 55003  | PAK1IP1       | L |
| 5058 | PAK1     | 57381  | RHOJ          | L |
| 5062 | PAK2     | 5879   | RAC1          | L |
| 5062 | PAK2     | 8874   | ARHGEF7       | L |
| 5062 | PAK2     | 10006  | ABI1          | L |
| 5062 | PAK2     | 30011  | SH3KBP1       | L |
| 5062 | PAK2     | 51225  | ABI3          | L |
| 5063 | PAK3     | 5829   | PXN           | L |
| 5063 | PAK3     | 8874   | ARHGEF7       | L |
| 5063 | PAK3     | 9459   | ARHGEF6       | L |
| 5063 | PAK3     | 9815   | GIT2          | L |
| 5063 | PAK3     | 28964  | GIT1          | L |

|      |       |        |          |   |
|------|-------|--------|----------|---|
| 5066 | PAM   | 8997   | KALRN    | L |
| 5066 | PAM   | 9182   | PAMCI    | L |
| 5068 | REG3A | 5967   | REG1A    | L |
| 5068 | REG3A | 6383   | SDC2     | L |
| 5069 | PAPPA | 5340   | PLG      | L |
| 5069 | PAPPA | 5553   | PRG2     | L |
| 5069 | PAPPA | 6498   | SKIL     | L |
| 5069 | PAPPA | 55729  | ATF7IP   | L |
| 5071 | PARK2 | 5413   | SEPT5    | L |
| 5071 | PARK2 | 5414   | SEPT4    | L |
| 5071 | PARK2 | 5810   | RAD1     | S |
| 5071 | PARK2 | 5879   | RAC1     | S |
| 5071 | PARK2 | 5997   | RGS2     | S |
| 5071 | PARK2 | 6622   | SNCA     | L |
| 5071 | PARK2 | 7314   | UBB      | L |
| 5071 | PARK2 | 7326   | UBE2G1   | L |
| 5071 | PARK2 | 7332   | UBE2L3   | L |
| 5071 | PARK2 | 7414   | VCL      | L |
| 5071 | PARK2 | 7965   | JTV1     | L |
| 5071 | PARK2 | 8573   | CASK     | L |
| 5071 | PARK2 | 9246   | UBE2L6   | L |
| 5071 | PARK2 | 9319   | TRIP13   | R |
| 5071 | PARK2 | 9627   | SNCAIP   | L |
| 5071 | PARK2 | 55294  | FBXW7    | L |
| 5071 | PARK2 | 56901  | LOC56901 | S |
| 5071 | PARK2 | 284004 | FLJ23825 | S |
| 5073 | PARN  | 8570   | KHSRP    | L |
| 5073 | PARN  | 10200  | MPHOSPH6 | L |
| 5073 | PARN  | 84221  | C21orf56 | L |
| 5074 | PAWR  | 5371   | PML      | L |
| 5074 | PAWR  | 5590   | PRKCZ    | L |
| 5074 | PAWR  | 7490   | WT1      | L |
| 5074 | PAWR  | 22800  | RRAS2    | S |
| 5076 | PAX2  | 5599   | MAPK8    | L |
| 5076 | PAX2  | 22976  | PAXIP1   | L |
| 5077 | PAX3  | 6663   | SOX10    | L |
| 5077 | PAX3  | 10519  | CIB1     | L |
| 5079 | PAX5  | 7091   | TLE4     | L |
| 5080 | PAX6  | 5087   | PBX1     | L |
| 5080 | PAX6  | 6496   | SIX3     | L |
| 5080 | PAX6  | 6657   | SOX2     | L |
| 5080 | PAX6  | 6658   | SOX3     | L |
| 5080 | PAX6  | 6908   | TBP      | L |
| 5080 | PAX6  | 9670   | IPO13    | R |
| 5080 | PAX6  | 30062  | RAX      | L |
| 5081 | PAX7  | 7290   | HIRA     | L |
| 5082 | PDCL  | 6950   | TCP1     | L |
| 5083 | PAX9  | 10765  | JARID1B  | L |
| 5089 | PBX2  | 6124   | RPL4     | L |
| 5089 | PBX2  | 8518   | IKBKAP   | L |
| 5089 | PBX2  | 10445  | MCRS1    | L |
| 5089 | PBX2  | 10458  | BAIAP2   | L |
| 5089 | PBX2  | 10980  | COPS6    | L |
| 5089 | PBX2  | 11258  | DCTN3    | L |
| 5089 | PBX2  | 23636  | NUP62    | L |
| 5089 | PBX2  | 26750  | RPS6KC1  | L |
| 5089 | PBX2  | 55625  | ZDHHC7   | L |
| 5089 | PBX2  | 64754  | SMYD3    | L |
| 5089 | PBX2  | 197259 | MLKL     | L |
| 5089 | PBX2  | 283234 | FLJ37970 | L |
| 5090 | PBX3  | 57085  | AGTRAP   | R |
| 5092 | PCBD1 | 6927   | TCF1     | L |
| 5092 | PCBD1 | 9149   | DYRK1B   | L |
| 5092 | PCBD1 | 9513   | FXR2     | R |
| 5092 | PCBD1 | 26003  | GORASP2  | R |
| 5092 | PCBD1 | 55093  | C8orf32  | R |
| 5092 | PCBD1 | 60491  | NIF3L1   | R |

|      |          |        |          |   |
|------|----------|--------|----------|---|
| 5092 | PCBD1    | 79873  | NUDT18   | R |
| 5092 | PCBD1    | 84708  | LNX      | R |
| 5093 | PCBP1    | 10915  | TCERG1   | L |
| 5093 | PCBP1    | 26986  | PABPC1   | L |
| 5094 | PCBP2    | 5725   | PTBP1    | L |
| 5094 | PCBP2    | 26986  | PABPC1   | L |
| 5094 | PCBP2    | 55660  | FNBP3    | L |
| 5097 | PCDH1    | 55729  | ATF7IP   | L |
| 5104 | SERPINA5 | 5327   | PLAT     | L |
| 5104 | SERPINA5 | 5328   | PLAU     | L |
| 5104 | SERPINA5 | 5624   | PROC     | L |
| 5104 | SERPINA5 | 6407   | SEMG2    | L |
| 5104 | SERPINA5 | 7056   | THBD     | L |
| 5104 | SERPINA5 | 10980  | COPS6    | S |
| 5108 | PCM1     | 5116   | PCNT2    | L |
| 5108 | PCM1     | 9001   | HAP1     | L |
| 5108 | PCM1     | 10152  | ABI2     | R |
| 5108 | PCM1     | 23392  | KIAA0368 | R |
| 5108 | PCM1     | 51019  | CGI-116  | R |
| 5108 | PCM1     | 55722  | Cep72    | R |
| 5108 | PCM1     | 84289  | ING5     | R |
| 5108 | PCM1     | 123016 | TTC8     | L |
| 5108 | PCM1     | 149371 | EXOC8    | R |
| 5111 | PCNA     | 5423   | POLB     | L |
| 5111 | PCNA     | 5424   | POLD1    | L |
| 5111 | PCNA     | 5425   | POLD2    | L |
| 5111 | PCNA     | 5426   | POLE     | L |
| 5111 | PCNA     | 5429   | POLH     | L |
| 5111 | PCNA     | 5591   | PRKDC    | L |
| 5111 | PCNA     | 5757   | PTMA     | L |
| 5111 | PCNA     | 5883   | RAD9A    | L |
| 5111 | PCNA     | 5981   | RFC1     | L |
| 5111 | PCNA     | 5982   | RFC2     | L |
| 5111 | PCNA     | 5983   | RFC3     | L |
| 5111 | PCNA     | 5984   | RFC4     | L |
| 5111 | PCNA     | 5985   | RFC5     | L |
| 5111 | PCNA     | 6949   | TCOF1    | L |
| 5111 | PCNA     | 7374   | UNG      | L |
| 5111 | PCNA     | 7486   | WRN      | L |
| 5111 | PCNA     | 7515   | XRCC1    | L |
| 5111 | PCNA     | 7520   | XRCC5    | L |
| 5111 | PCNA     | 9156   | EXO1     | L |
| 5111 | PCNA     | 10036  | CHAF1A   | L |
| 5111 | PCNA     | 10309  | UNG2     | L |
| 5111 | PCNA     | 10514  | MYBBP1A  | L |
| 5111 | PCNA     | 10714  | POLD3    | L |
| 5111 | PCNA     | 10912  | GADD45G  | L |
| 5111 | PCNA     | 10923  | SUB1     | L |
| 5111 | PCNA     | 26073  | POLDIP2  | L |
| 5111 | PCNA     | 27301  | APEX2    | L |
| 5111 | PCNA     | 27343  | POLL     | L |
| 5111 | PCNA     | 30836  | ERBP     | L |
| 5111 | PCNA     | 79075  | DCC1     | L |
| 5111 | PCNA     | 253980 | KCTD13   | L |
| 5116 | PCNT2    | 7283   | TUBG1    | L |
| 5116 | PCNT2    | 10142  | AKAP9    | L |
| 5116 | PCNT2    | 10426  | TUBGCP3  | L |
| 5116 | PCNT2    | 27185  | DISC1    | L |
| 5118 | PCOLCE   | 5829   | PXN      | L |
| 5125 | PCSK5    | 5972   | REN      | L |
| 5125 | PCSK5    | 10513  | APPBP2   | R |
| 5126 | PCSK2    | 6447   | SGNE1    | L |
| 5127 | PCTK1    | 7531   | YWHAE    | L |
| 5127 | PCTK1    | 7532   | YWHAG    | L |
| 5127 | PCTK1    | 7533   | YWHAH    | L |
| 5127 | PCTK1    | 7534   | YWHAZ    | L |
| 5127 | PCTK1    | 7917   | BAT3     | S |

|      |        |        |           |   |
|------|--------|--------|-----------|---|
| 5128 | PCTK2  | 23424  | TDRD7     | L |
| 5129 | PCTK3  | 8812   | CCNK      | R |
| 5129 | PCTK3  | 11007  | DIPA      | R |
| 5130 | PCYT1A | 8841   | HDAC3     | L |
| 5133 | PDCD1  | 29126  | CD274     | L |
| 5133 | PDCD1  | 80380  | PDCD1LG2  | L |
| 5134 | PDCD2  | 9611   | NCOR1     | L |
| 5134 | PDCD2  | 25942  | SIN3A     | L |
| 5134 | PDCD2  | 51691  | LSM8      | L |
| 5140 | PDE3B  | 7529   | YWHAB     | L |
| 5144 | PDE4D  | 9472   | AKAP6     | L |
| 5144 | PDE4D  | 9659   | PDE4DIP   | L |
| 5144 | PDE4D  | 10399  | GNB2L1    | L |
| 5147 | PDE6D  | 5872   | RAB13     | L |
| 5147 | PDE6D  | 5886   | RAD23A    | R |
| 5147 | PDE6D  | 5906   | RAP1A     | L |
| 5147 | PDE6D  | 5912   | RAP2B     | L |
| 5147 | PDE6D  | 5921   | RASA1     | L |
| 5147 | PDE6D  | 6009   | RHEB      | L |
| 5147 | PDE6D  | 6103   | RPGR      | L |
| 5147 | PDE6D  | 22931  | RAB18     | S |
| 5147 | PDE6D  | 54622  | ARFRP2    | S |
| 5147 | PDE6D  | 203259 | C9orf25   | S |
| 5148 | PDE6G  | 6714   | SRC       | L |
| 5152 | PDE9A  | 22954  | TRIM32    | R |
| 5152 | PDE9A  | 84457  | PHYHIPL   | R |
| 5155 | PDGFB  | 5156   | PDGFRA    | L |
| 5155 | PDGFB  | 5159   | PDGFRB    | L |
| 5155 | PDGFB  | 7057   | THBS1     | L |
| 5155 | PDGFB  | 11333  | PDAP1     | L |
| 5156 | PDGFRA | 5159   | PDGFRB    | L |
| 5156 | PDGFRA | 5335   | PLCG1     | L |
| 5156 | PDGFRA | 5781   | PTPN11    | L |
| 5156 | PDGFRA | 6461   | SHB       | L |
| 5156 | PDGFRA | 6643   | SNX2      | L |
| 5156 | PDGFRA | 8723   | SNX4      | L |
| 5156 | PDGFRA | 9368   | SLC9A3R1  | L |
| 5156 | PDGFRA | 56034  | PDGFC     | L |
| 5159 | PDGFRB | 5295   | PIK3R1    | L |
| 5159 | PDGFRB | 5296   | PIK3R2    | L |
| 5159 | PDGFRB | 5335   | PLCG1     | L |
| 5159 | PDGFRB | 5610   | EIF2AK2   | L |
| 5159 | PDGFRB | 5747   | PTK2      | L |
| 5159 | PDGFRB | 5781   | PTPN11    | L |
| 5159 | PDGFRB | 5894   | RAF1      | L |
| 5159 | PDGFRB | 5921   | RASA1     | L |
| 5159 | PDGFRB | 6461   | SHB       | L |
| 5159 | PDGFRB | 6464   | SHC1      | L |
| 5159 | PDGFRB | 6642   | SNX1      | L |
| 5159 | PDGFRB | 6714   | SRC       | L |
| 5159 | PDGFRB | 8440   | NCK2      | L |
| 5159 | PDGFRB | 8503   | PIK3R3    | L |
| 5159 | PDGFRB | 8651   | SOCS1     | L |
| 5159 | PDGFRB | 9368   | SLC9A3R1  | L |
| 5159 | PDGFRB | 11333  | PDAP1     | L |
| 5159 | PDGFRB | 30011  | SH3KBP1   | L |
| 5159 | PDGFRB | 83755  | KRTAP4-12 | R |
| 5160 | PDHA1  | 5162   | PDHB      | L |
| 5161 | PDHA2  | 5162   | PDHB      | L |
| 5162 | PDHB   | 8050   | PDHX      | L |
| 5163 | PDK1   | 5164   | PDK2      | L |
| 5163 | PDK1   | 5580   | PRKCD     | L |
| 5163 | PDK1   | 7533   | YWHAH     | L |
| 5164 | PDK2   | 8050   | PDHX      | L |
| 5164 | PDK2   | 23119  | HIC2      | S |
| 5164 | PDK2   | 79763  | ISOC2     | S |
| 5170 | PDPK1  | 5566   | PRKACA    | L |



|      |        |        |          |   |
|------|--------|--------|----------|---|
| 5170 | PDPK1  | 5579   | PRKCB1   | L |
| 5170 | PDPK1  | 5580   | PRKCD    | L |
| 5170 | PDPK1  | 5584   | PRKCI    | L |
| 5170 | PDPK1  | 5585   | PKN1     | L |
| 5170 | PDPK1  | 5586   | PKN2     | L |
| 5170 | PDPK1  | 5590   | PRKCZ    | L |
| 5170 | PDPK1  | 5900   | RALGDS   | L |
| 5170 | PDPK1  | 6197   | RPS6KA3  | L |
| 5170 | PDPK1  | 6198   | RPS6KB1  | L |
| 5170 | PDPK1  | 6446   | SGK      | L |
| 5170 | PDPK1  | 7533   | YWHAH    | L |
| 5170 | PDPK1  | 9351   | SLC9A3R2 | L |
| 5170 | PDPK1  | 10971  | YWHAQ    | L |
| 5170 | PDPK1  | 11098  | PRSS23   | S |
| 5170 | PDPK1  | 64400  | FTS      | L |
| 5170 | PDPK1  | 146059 | CDAN1    | S |
| 5174 | PDZK1  | 5830   | PEX5     | R |
| 5174 | PDZK1  | 6550   | SLC9A3   | L |
| 5174 | PDZK1  | 6568   | SLC17A1  | L |
| 5174 | PDZK1  | 6583   | SLC22A4  | L |
| 5174 | PDZK1  | 10158  | PDZK1IP1 | L |
| 5174 | PDZK1  | 11216  | AKAP10   | L |
| 5174 | PDZK1  | 116085 | SLC22A12 | L |
| 5175 | PECAM1 | 5335   | PLCG1    | L |
| 5175 | PECAM1 | 5581   | PRKCE    | L |
| 5175 | PECAM1 | 5777   | PTPN6    | L |
| 5175 | PECAM1 | 5781   | PTPN11   | L |
| 5175 | PECAM1 | 6714   | SRC      | L |
| 5175 | PECAM1 | 7525   | YES1     | L |
| 5175 | PECAM1 | 55660  | FNBP3    | L |
| 5178 | PEG3   | 6477   | SIAH1    | L |
| 5178 | PEG3   | 6478   | SIAH2    | L |
| 5187 | PER1   | 8863   | PER3     | L |
| 5187 | PER1   | 8864   | PER2     | L |
| 5187 | PER1   | 8914   | TIMELESS | L |
| 5189 | PEX1   | 5190   | PEX6     | L |
| 5189 | PEX1   | 55670  | PEX26    | L |
| 5190 | PEX6   | 55670  | PEX26    | L |
| 5190 | PEX6   | 55729  | ATF7IP   | L |
| 5191 | PEX7   | 5194   | PEX13    | L |
| 5191 | PEX7   | 5195   | PEX14    | L |
| 5191 | PEX7   | 5264   | PHYH     | L |
| 5191 | PEX7   | 5830   | PEX5     | L |
| 5192 | PEX10  | 5193   | PEX12    | L |
| 5192 | PEX10  | 5824   | PEX19    | L |
| 5192 | PEX10  | 5828   | PXMP3    | L |
| 5192 | PEX10  | 5830   | PEX5     | L |
| 5193 | PEX12  | 5824   | PEX19    | L |
| 5193 | PEX12  | 5830   | PEX5     | L |
| 5194 | PEX13  | 5195   | PEX14    | L |
| 5194 | PEX13  | 5824   | PEX19    | L |
| 5194 | PEX13  | 5830   | PEX5     | L |
| 5195 | PEX14  | 5824   | PEX19    | L |
| 5195 | PEX14  | 5830   | PEX5     | L |
| 5195 | PEX14  | 6601   | SMARCC2  | S |
| 5195 | PEX14  | 11244  | ZHX1     | S |
| 5195 | PEX14  | 112950 | MED8     | S |
| 5196 | PF4    | 5552   | PRG1     | L |
| 5196 | PF4    | 5624   | PROC     | L |
| 5196 | PF4    | 6383   | SDC2     | L |
| 5196 | PF4    | 7056   | THBD     | L |
| 5201 | PFDN1  | 5720   | PSME1    | S |
| 5201 | PFDN1  | 6176   | RPLP1    | S |
| 5201 | PFDN1  | 9001   | HAP1     | S |
| 5201 | PFDN1  | 9737   | GPRASP1  | S |
| 5201 | PFDN1  | 10989  | IMMT     | S |
| 5201 | PFDN1  | 28964  | GIT1     | S |

|      |        |       |           |   |
|------|--------|-------|-----------|---|
| 5201 | PFDN1  | 51003 | MED31     | S |
| 5201 | PFDN1  | 55791 | C1orf103  | S |
| 5201 | PFDN1  | 57562 | KIAA1377  | S |
| 5201 | PFDN1  | 79953 | C20orf39  | S |
| 5204 | PFDN5  | 7161  | TP73      | L |
| 5208 | PFKFB2 | 7534  | YWHAZ     | L |
| 5208 | PFKFB2 | 10971 | YWHAQ     | L |
| 5211 | PFKL   | 7094  | TLN1      | L |
| 5211 | PFKL   | 10980 | COPS6     | S |
| 5211 | PFKL   | 55660 | FNBFP3    | L |
| 5211 | PFKL   | 83755 | KRTAP4-12 | R |
| 5213 | PFKM   | 8655  | DNCL1     | L |
| 5213 | PFKM   | 50617 | ATP6V0A4  | L |
| 5214 | PFKP   | 8655  | DNCL1     | L |
| 5216 | PFN1   | 5295  | PIK3R1    | L |
| 5216 | PFN1   | 7088  | TLE1      | S |
| 5216 | PFN1   | 7408  | VASP      | L |
| 5216 | PFN1   | 7414  | VCL       | L |
| 5216 | PFN1   | 8936  | WASF1     | L |
| 5216 | PFN1   | 8976  | WASL      | L |
| 5216 | PFN1   | 9231  | DLG5      | S |
| 5216 | PFN1   | 10243 | GPHN      | L |
| 5216 | PFN1   | 11161 | C14orf1   | S |
| 5216 | PFN1   | 23214 | XPO6      | L |
| 5216 | PFN1   | 23433 | RHOQ      | L |
| 5217 | PFN2   | 5329  | PLAUR     | S |
| 5217 | PFN2   | 5413  | SEPT5     | S |
| 5217 | PFN2   | 5802  | PTPRS     | S |
| 5217 | PFN2   | 5909  | RAP1GA1   | S |
| 5217 | PFN2   | 6093  | ROCK1     | L |
| 5217 | PFN2   | 6204  | RPS10     | S |
| 5217 | PFN2   | 6449  | SGTA      | S |
| 5217 | PFN2   | 7013  | TERF1     | S |
| 5217 | PFN2   | 7408  | VASP      | L |
| 5217 | PFN2   | 10625 | IVNS1ABP  | S |
| 5217 | PFN2   | 29070 | HSPC065   | S |
| 5217 | PFN2   | 29109 | FHOD1     | L |
| 5217 | PFN2   | 51466 | EVL       | L |
| 5217 | PFN2   | 55339 | WDR33     | S |
| 5217 | PFN2   | 65990 | C16orf24  | S |
| 5217 | PFN2   | 81847 | RNF146    | S |
| 5223 | PGAM1  | 8502  | PKP4      | S |
| 5224 | PGAM2  | 7414  | VCL       | L |
| 5226 | PGD    | 51691 | LSM8      | L |
| 5228 | PGF    | 7422  | VEGF      | L |
| 5228 | PGF    | 8828  | NRP2      | L |
| 5228 | PGF    | 8829  | NRP1      | L |
| 5230 | PGK1   | 10808 | HSPH1     | L |
| 5236 | PGM1   | 6271  | S100A1    | L |
| 5236 | PGM1   | 6285  | S100B     | L |
| 5239 | PGM5   | 7402  | UTRN      | L |
| 5241 | PGR    | 5970  | RELA      | L |
| 5241 | PGR    | 7337  | UBE3A     | L |
| 5241 | PGR    | 8648  | NCOA1     | L |
| 5241 | PGR    | 8805  | TRIM24    | L |
| 5241 | PGR    | 8850  | PCAF      | L |
| 5241 | PGR    | 51366 | EDD1      | L |
| 5245 | PHB    | 5894  | RAF1      | L |
| 5245 | PHB    | 5925  | RB1       | L |
| 5245 | PHB    | 5933  | RBL1      | L |
| 5245 | PHB    | 5934  | RBL2      | L |
| 5245 | PHB    | 6595  | SMARCA2   | L |
| 5245 | PHB    | 6597  | SMARCA4   | L |
| 5245 | PHB    | 7157  | TP53      | L |
| 5245 | PHB    | 9611  | NCOR1     | L |
| 5245 | PHB    | 25942 | SIN3A     | L |
| 5251 | PHEX   | 8074  | FGF23     | L |

|      |           |        |               |   |
|------|-----------|--------|---------------|---|
| 5252 | PHF1      | 11030  | RBPMS         | R |
| 5252 | PHF1      | 55145  | THAP1         | R |
| 5257 | PHKB      | 54976  | C20orf27      | R |
| 5264 | PHYH      | 10040  | TOM1L1        | S |
| 5265 | SERPINA1  | 5644   | PRSS1         | L |
| 5265 | SERPINA1  | 5646   | PRSS3         | L |
| 5265 | SERPINA1  | 5657   | PRTN3         | L |
| 5269 | SERPINB6  | 5328   | PLAU          | L |
| 5269 | SERPINB6  | 5340   | PLG           | L |
| 5269 | SERPINB6  | 5624   | PROC          | L |
| 5271 | SERPINB8  | 5644   | PRSS1         | L |
| 5271 | SERPINB8  | 10487  | CAP1          | L |
| 5272 | SERPINB9  | 7088   | TLE1          | S |
| 5272 | SERPINB9  | 7157   | TP53          | S |
| 5272 | SERPINB9  | 7280   | TUBB2         | S |
| 5272 | SERPINB9  | 9094   | UNC119        | S |
| 5272 | SERPINB9  | 9842   | PLEKHM1       | S |
| 5272 | SERPINB9  | 9869   | SETDB1        | S |
| 5272 | SERPINB9  | 10980  | COPS6         | S |
| 5272 | SERPINB9  | 11161  | C14orf1       | S |
| 5272 | SERPINB9  | 11244  | ZHX1          | S |
| 5272 | SERPINB9  | 29117  | BRD7          | S |
| 5272 | SERPINB9  | 51003  | MED31         | S |
| 5272 | SERPINB9  | 55660  | FNBP3         | S |
| 5272 | SERPINB9  | 55791  | C1orf103      | S |
| 5272 | SERPINB9  | 60492  | MDS025        | S |
| 5272 | SERPINB9  | 84060  | DKFZP564O0523 | S |
| 5272 | SERPINB9  | 84966  | IGSF21        | S |
| 5272 | SERPINB9  | 197131 | UBR1          | S |
| 5274 | SERPINI1  | 5327   | PLAT          | L |
| 5275 | SERPINB13 | 5340   | PLG           | L |
| 5275 | SERPINB13 | 5644   | PRSS1         | L |
| 5275 | SERPINB13 | 5657   | PRTN3         | L |
| 5276 | SERPINI2  | 29979  | UBQLN1        | R |
| 5277 | PIGA      | 5279   | PIGC          | L |
| 5277 | PIGA      | 5283   | PIGH          | L |
| 5277 | PIGA      | 9091   | PIGQ          | L |
| 5279 | PIGC      | 5283   | PIGH          | L |
| 5279 | PIGC      | 9091   | PIGQ          | L |
| 5279 | PIGC      | 11244  | ZHX1          | S |
| 5283 | PIGH      | 9091   | PIGQ          | L |
| 5284 | PIGR      | 5865   | RAB3B         | L |
| 5284 | PIGR      | 6352   | CCL5          | L |
| 5289 | PIK3C3    | 5306   | PITPNA        | L |
| 5289 | PIK3C3    | 30849  | PIK3R4        | L |
| 5290 | PIK3CA    | 5295   | PIK3R1        | L |
| 5290 | PIK3CA    | 5580   | PRKCD         | L |
| 5290 | PIK3CA    | 8471   | IRS4          | L |
| 5290 | PIK3CA    | 8503   | PIK3R3        | L |
| 5291 | PIK3CB    | 5295   | PIK3R1        | L |
| 5291 | PIK3CB    | 5581   | PRKCE         | L |
| 5292 | PIM1      | 6470   | SHMT1         | S |
| 5292 | PIM1      | 10951  | CBX1          | L |
| 5292 | PIM1      | 11335  | CBX3          | L |
| 5292 | PIM1      | 27044  | SND1          | L |
| 5293 | PIK3CD    | 5295   | PIK3R1        | L |
| 5293 | PIK3CD    | 5296   | PIK3R2        | L |
| 5293 | PIK3CD    | 22913  | RALY          | S |
| 5293 | PIK3CD    | 30000  | TNPO2         | S |
| 5293 | PIK3CD    | 84164  | ASCC2         | S |
| 5293 | PIK3CD    | 84331  | MGC15416      | S |
| 5294 | PIK3CG    | 23533  | PIK3R5        | L |
| 5294 | PIK3CG    | 23541  | SEC14L2       | L |
| 5295 | PIK3R1    | 5747   | PTK2          | L |
| 5295 | PIK3R1    | 5777   | PTPN6         | L |
| 5295 | PIK3R1    | 5781   | PTPN11        | L |
| 5295 | PIK3R1    | 5879   | RAC1          | L |

|      |        |        |               |   |
|------|--------|--------|---------------|---|
| 5295 | PIK3R1 | 5925   | RB1           | L |
| 5295 | PIK3R1 | 5979   | RET           | L |
| 5295 | PIK3R1 | 6461   | SHB           | L |
| 5295 | PIK3R1 | 6464   | SHC1          | L |
| 5295 | PIK3R1 | 6549   | SLC9A2        | L |
| 5295 | PIK3R1 | 6714   | SRC           | L |
| 5295 | PIK3R1 | 6853   | SYN1          | L |
| 5295 | PIK3R1 | 7010   | TEK           | L |
| 5295 | PIK3R1 | 7046   | TGFBR1        | L |
| 5295 | PIK3R1 | 7075   | TIE1          | L |
| 5295 | PIK3R1 | 7283   | TUBG1         | L |
| 5295 | PIK3R1 | 7297   | TYK2          | L |
| 5295 | PIK3R1 | 7301   | TYRO3         | L |
| 5295 | PIK3R1 | 7430   | VIL2          | L |
| 5295 | PIK3R1 | 7454   | WAS           | L |
| 5295 | PIK3R1 | 8038   | ADAM12        | L |
| 5295 | PIK3R1 | 8471   | IRS4          | L |
| 5295 | PIK3R1 | 8660   | IRS2          | L |
| 5295 | PIK3R1 | 9146   | HGS           | L |
| 5295 | PIK3R1 | 9846   | GAB2          | L |
| 5295 | PIK3R1 | 10040  | TOM1L1        | L |
| 5295 | PIK3R1 | 10376  | K-ALPHA-1     | L |
| 5295 | PIK3R1 | 10451  | VAV3          | L |
| 5295 | PIK3R1 | 22800  | RRAS2         | L |
| 5295 | PIK3R1 | 23607  | CD2AP         | L |
| 5295 | PIK3R1 | 50852  | TRAT1         | L |
| 5295 | PIK3R1 | 116986 | CENTG1        | L |
| 5295 | PIK3R1 | 139716 | GAB3          | L |
| 5296 | PIK3R2 | 6464   | SHC1          | L |
| 5296 | PIK3R2 | 7046   | TGFBR1        | L |
| 5296 | PIK3R2 | 8651   | SOCS1         | L |
| 5297 | PIK4CA | 29888  | STRN4         | S |
| 5298 | PIK4CB | 23413  | FREQ          | L |
| 5300 | PIN1   | 5347   | PLK1          | L |
| 5300 | PIN1   | 5430   | POLR2A        | L |
| 5300 | PIN1   | 5770   | PTPN1         | L |
| 5300 | PIN1   | 5867   | RAB4A         | L |
| 5300 | PIN1   | 5932   | RBBP8         | R |
| 5300 | PIN1   | 6829   | SUPT5H        | L |
| 5300 | PIN1   | 7153   | TOP2A         | L |
| 5300 | PIN1   | 7157   | TP53          | L |
| 5300 | PIN1   | 7161   | TP73          | L |
| 5300 | PIN1   | 7186   | TRAF2         | R |
| 5300 | PIN1   | 8733   | GPAA1         | S |
| 5300 | PIN1   | 9021   | SOCS3         | S |
| 5300 | PIN1   | 9088   | PKMYT1        | L |
| 5300 | PIN1   | 9585   | MPHOSPH1      | L |
| 5300 | PIN1   | 9650   | MTFR1         | S |
| 5300 | PIN1   | 10743  | RAI1          | R |
| 5300 | PIN1   | 11030  | RBPMS         | R |
| 5300 | PIN1   | 23062  | GGA2          | R |
| 5300 | PIN1   | 27252  | KLHL20        | S |
| 5300 | PIN1   | 53635  | PTOV1         | S |
| 5300 | PIN1   | 54819  | ZCCHC10       | S |
| 5300 | PIN1   | 57062  | DDX24         | S |
| 5300 | PIN1   | 79586  | CHPF          | S |
| 5300 | PIN1   | 81628  | TSC22D4       | R |
| 5300 | PIN1   | 83637  | DKFZp761I2123 | R |
| 5303 | PIN4   | 6709   | SPTAN1        | S |
| 5303 | PIN4   | 84164  | ASCC2         | S |
| 5306 | PITPNA | 5335   | PLCG1         | L |
| 5307 | PITX1  | 5449   | POU1F1        | L |
| 5307 | PITX1  | 11030  | RBPMS         | R |
| 5307 | PITX1  | 84528  | PEPP-2        | R |
| 5308 | PITX2  | 5626   | PROP1         | L |
| 5310 | PKD1   | 5311   | PKD2          | L |
| 5310 | PKD1   | 5747   | PTK2          | L |

|      |         |        |          |   |
|------|---------|--------|----------|---|
| 5310 | PKD1    | 5829   | PXN      | L |
| 5310 | PKD1    | 6000   | RGS7     | L |
| 5310 | PKD1    | 6714   | SRC      | L |
| 5310 | PKD1    | 7094   | TLN1     | L |
| 5310 | PKD1    | 9564   | BCAR1    | L |
| 5310 | PKD1    | 55729  | ATF7IP   | L |
| 5311 | PKD2    | 7137   | TNNI3    | L |
| 5311 | PKD2    | 23607  | CD2AP    | L |
| 5315 | PKM2    | 5829   | PXN      | L |
| 5315 | PKM2    | 56915  | EXOSC5   | L |
| 5315 | PKM2    | 93145  | OLFM2    | S |
| 5317 | PKP1    | 7431   | VIM      | L |
| 5319 | PLA2G1B | 9373   | PLAA     | L |
| 5321 | PLA2G4A | 5322   | PLA2G5   | L |
| 5321 | PLA2G4A | 10524  | HTATIP   | L |
| 5327 | PLAT    | 5328   | PLAU     | L |
| 5327 | PLAT    | 6678   | SPARC    | L |
| 5327 | PLAT    | 7123   | CLEC3B   | L |
| 5327 | PLAT    | 284217 | LAMA1    | L |
| 5328 | PLAU    | 5329   | PLAUR    | L |
| 5328 | PLAU    | 5340   | PLG      | L |
| 5328 | PLAU    | 6768   | ST14     | L |
| 5329 | PLAUR   | 6835   | SURF2    | S |
| 5329 | PLAUR   | 7448   | VTN      | L |
| 5329 | PLAUR   | 222019 | (null)   | S |
| 5330 | PLCB2   | 5606   | MAP2K3   | L |
| 5330 | PLCB2   | 5608   | MAP2K6   | L |
| 5330 | PLCB2   | 9368   | SLC9A3R1 | L |
| 5330 | PLCB2   | 54822  | TRPM7    | L |
| 5331 | PLCB3   | 6002   | RGS12    | L |
| 5331 | PLCB3   | 9351   | SLC9A3R2 | L |
| 5333 | PLCD1   | 7052   | TGM2     | L |
| 5335 | PLCG1   | 5336   | PLCG2    | L |
| 5335 | PLCG1   | 5338   | PLD2     | L |
| 5335 | PLCG1   | 5586   | PKN2     | L |
| 5335 | PLCG1   | 5587   | PRKD1    | L |
| 5335 | PLCG1   | 5747   | PTK2     | L |
| 5335 | PLCG1   | 5795   | PTPRJ    | L |
| 5335 | PLCG1   | 5979   | RET      | L |
| 5335 | PLCG1   | 6401   | SELE     | L |
| 5335 | PLCG1   | 6452   | SH3BP2   | L |
| 5335 | PLCG1   | 6461   | SHB      | L |
| 5335 | PLCG1   | 6654   | SOS1     | L |
| 5335 | PLCG1   | 6655   | SOS2     | L |
| 5335 | PLCG1   | 6714   | SRC      | L |
| 5335 | PLCG1   | 6850   | SYK      | L |
| 5335 | PLCG1   | 7275   | TUB      | L |
| 5335 | PLCG1   | 7454   | WAS      | L |
| 5335 | PLCG1   | 7462   | LAT2     | L |
| 5335 | PLCG1   | 7535   | ZAP70    | L |
| 5335 | PLCG1   | 8301   | PICALM   | L |
| 5335 | PLCG1   | 8525   | DGKZ     | L |
| 5335 | PLCG1   | 8615   | VDP      | L |
| 5335 | PLCG1   | 8660   | IRS2     | L |
| 5335 | PLCG1   | 8711   | TNK1     | L |
| 5335 | PLCG1   | 9531   | BAG3     | L |
| 5335 | PLCG1   | 9892   | SNAP91   | L |
| 5335 | PLCG1   | 10399  | GNB2L1   | L |
| 5335 | PLCG1   | 10451  | VAV3     | L |
| 5335 | PLCG1   | 10657  | KHDRBS1  | L |
| 5335 | PLCG1   | 28964  | GIT1     | L |
| 5335 | PLCG1   | 54822  | TRPM7    | L |
| 5336 | PLCG2   | 5587   | PRKD1    | L |
| 5336 | PLCG2   | 6452   | SH3BP2   | L |
| 5336 | PLCG2   | 7462   | LAT2     | L |
| 5336 | PLCG2   | 9846   | GAB2     | L |
| 5336 | PLCG2   | 10657  | KHDRBS1  | L |

|      |          |        |          |   |
|------|----------|--------|----------|---|
| 5336 | PLCG2    | 27040  | LAT      | L |
| 5336 | PLCG2    | 29760  | BLNK     | L |
| 5336 | PLCG2    | 57473  | GM632    | L |
| 5337 | PLD1     | 5578   | PRKCA    | L |
| 5337 | PLD1     | 5585   | PKN1     | L |
| 5337 | PLD1     | 5879   | RAC1     | L |
| 5337 | PLD1     | 5898   | RALA     | L |
| 5337 | PLD1     | 6622   | SNCA     | L |
| 5337 | PLD1     | 8394   | PIP5K1A  | L |
| 5337 | PLD1     | 8682   | PEA15    | L |
| 5337 | PLD1     | 25820  | ARIH1    | L |
| 5338 | PLD2     | 5578   | PRKCA    | L |
| 5338 | PLD2     | 5580   | PRKCD    | L |
| 5338 | PLD2     | 8394   | PIP5K1A  | L |
| 5338 | PLD2     | 8682   | PEA15    | L |
| 5339 | PLEC1    | 6708   | SPTA1    | L |
| 5339 | PLEC1    | 6709   | SPTAN1   | L |
| 5339 | PLEC1    | 7431   | VIM      | L |
| 5340 | PLG      | 5345   | SERPINF2 | L |
| 5340 | PLG      | 5621   | PRNP     | L |
| 5340 | PLG      | 6281   | S100A10  | L |
| 5340 | PLG      | 6678   | SPARC    | L |
| 5340 | PLG      | 7057   | THBS1    | L |
| 5340 | PLG      | 7123   | CLEC3B   | L |
| 5340 | PLG      | 7980   | TFPI2    | L |
| 5340 | PLG      | 154796 | AMOT     | L |
| 5340 | PLG      | 284217 | LAMA1    | L |
| 5345 | SERPINF2 | 5644   | PRSS1    | L |
| 5345 | SERPINF2 | 26085  | KLK13    | L |
| 5347 | PLK1     | 5682   | PSMA1    | L |
| 5347 | PLK1     | 5684   | PSMA3    | L |
| 5347 | PLK1     | 5685   | PSMA4    | L |
| 5347 | PLK1     | 5686   | PSMA5    | L |
| 5347 | PLK1     | 5687   | PSMA6    | L |
| 5347 | PLK1     | 5688   | PSMA7    | L |
| 5347 | PLK1     | 5689   | PSMB1    | L |
| 5347 | PLK1     | 5690   | PSMB2    | L |
| 5347 | PLK1     | 5691   | PSMB3    | L |
| 5347 | PLK1     | 5692   | PSMB4    | L |
| 5347 | PLK1     | 5693   | PSMB5    | L |
| 5347 | PLK1     | 5694   | PSMB6    | L |
| 5347 | PLK1     | 5695   | PSMB7    | L |
| 5347 | PLK1     | 7277   | TUBA1    | L |
| 5347 | PLK1     | 7280   | TUBB2    | L |
| 5347 | PLK1     | 7283   | TUBG1    | L |
| 5347 | PLK1     | 9400   | RECQL5   | S |
| 5347 | PLK1     | 9493   | KIF23    | L |
| 5347 | PLK1     | 9500   | MAGED1   | S |
| 5347 | PLK1     | 9600   | PITPNM1  | L |
| 5347 | PLK1     | 10726  | NUDC     | L |
| 5347 | PLK1     | 11200  | CHEK2    | L |
| 5347 | PLK1     | 51608  | C7orf20  | S |
| 5347 | PLK1     | 64689  | GORASP1  | L |
| 5347 | PLK1     | 259266 | ASPM     | L |
| 5348 | FXYD1    | 5566   | PRKACA   | L |
| 5348 | FXYD1    | 8611   | PPAP2A   | L |
| 5349 | FXYD3    | 26135  | SERBP1   | S |
| 5349 | FXYD3    | 54850  | FBXL12   | S |
| 5350 | PLN      | 5506   | PPP1R3A  | L |
| 5350 | PLN      | 6271   | S100A1   | L |
| 5350 | PLN      | 6588   | SLN      | L |
| 5355 | PLP2     | 8518   | IKBKAP   | S |
| 5355 | PLP2     | 10134  | BCAP31   | L |
| 5355 | PLP2     | 22839  | DLGAP4   | S |
| 5359 | PLSCR1   | 6590   | SLPI     | L |
| 5359 | PLSCR1   | 6687   | SPG7     | R |
| 5359 | PLSCR1   | 7355   | SLC35A2  | R |

|      |        |        |           |   |
|------|--------|--------|-----------|---|
| 5359 | PLSCR1 | 7408   | VASP      | R |
| 5359 | PLSCR1 | 7536   | SF1       | R |
| 5359 | PLSCR1 | 7704   | ZBTB16    | R |
| 5359 | PLSCR1 | 9140   | ATG12     | R |
| 5359 | PLSCR1 | 9618   | TRAF4     | L |
| 5359 | PLSCR1 | 9721   | KIAA0514  | R |
| 5359 | PLSCR1 | 9802   | DAZAP2    | R |
| 5359 | PLSCR1 | 10253  | SPRY2     | R |
| 5359 | PLSCR1 | 10342  | TFG       | R |
| 5359 | PLSCR1 | 10539  | TXNL2     | R |
| 5359 | PLSCR1 | 11052  | CPSF6     | R |
| 5359 | PLSCR1 | 11067  | C10orf10  | R |
| 5359 | PLSCR1 | 11135  | CDC42EP1  | R |
| 5359 | PLSCR1 | 22822  | PHLDA1    | R |
| 5359 | PLSCR1 | 23493  | HEY2      | R |
| 5359 | PLSCR1 | 25796  | PGLS      | R |
| 5359 | PLSCR1 | 25844  | YIPF3     | R |
| 5359 | PLSCR1 | 27332  | ZNF638    | R |
| 5359 | PLSCR1 | 30008  | EFEMP2    | R |
| 5359 | PLSCR1 | 51447  | IHPK2     | R |
| 5359 | PLSCR1 | 51545  | ZNF581    | R |
| 5359 | PLSCR1 | 51586  | PCQAP     | R |
| 5359 | PLSCR1 | 51655  | RASD1     | R |
| 5359 | PLSCR1 | 54507  | TSRC1     | R |
| 5359 | PLSCR1 | 54932  | FLJ20433  | R |
| 5359 | PLSCR1 | 54973  | CPSF3L    | R |
| 5359 | PLSCR1 | 55707  | NECAP2    | R |
| 5359 | PLSCR1 | 56654  | NPDC1     | R |
| 5359 | PLSCR1 | 57048  | PLSCR3    | R |
| 5359 | PLSCR1 | 57088  | PLSCR4    | R |
| 5359 | PLSCR1 | 59277  | NTN4      | R |
| 5359 | PLSCR1 | 64115  | C10orf54  | R |
| 5359 | PLSCR1 | 64773  | C20orf81  | R |
| 5359 | PLSCR1 | 65989  | EGFL9     | R |
| 5359 | PLSCR1 | 79050  | NOC4L     | R |
| 5359 | PLSCR1 | 80028  | FBXL18    | R |
| 5359 | PLSCR1 | 80125  | FLJ32855  | R |
| 5359 | PLSCR1 | 80726  | KIAA1683  | R |
| 5359 | PLSCR1 | 83640  | MGC2560   | R |
| 5359 | PLSCR1 | 83755  | KRTAP4-12 | R |
| 5359 | PLSCR1 | 84080  | C16orf48  | R |
| 5359 | PLSCR1 | 92070  | MGC21675  | R |
| 5359 | PLSCR1 | 92595  | MGC13138  | R |
| 5359 | PLSCR1 | 113878 | DTX2      | R |
| 5359 | PLSCR1 | 115817 | DHRS1     | R |
| 5359 | PLSCR1 | 129807 | NEU4      | R |
| 5359 | PLSCR1 | 196477 | C12orf12  | R |
| 5359 | PLSCR1 | 284440 | MGC39821  | R |
| 5359 | PLSCR1 | 414157 | C10orf62  | R |
| 5362 | PLXNA2 | 9898   | UBAP2L    | L |
| 5362 | PLXNA2 | 23360  | FNBP4     | L |
| 5362 | PLXNA2 | 57214  | KIAA1199  | L |
| 5362 | PLXNA2 | 57560  | WDR56     | L |
| 5364 | PLXNB1 | 5879   | RAC1      | L |
| 5364 | PLXNB1 | 9826   | ARHGEF11  | L |
| 5364 | PLXNB1 | 10507  | SEMA4D    | L |
| 5364 | PLXNB1 | 10509  | SEMA4B    | L |
| 5364 | PLXNB1 | 23365  | ARHGEF12  | L |
| 5364 | PLXNB1 | 27289  | RND1      | L |
| 5365 | PLXNB3 | 9826   | ARHGEF11  | L |
| 5366 | PMAIP1 | 5473   | PPBP      | S |
| 5366 | PMAIP1 | 7704   | ZBTB16    | S |
| 5371 | PML    | 5914   | RARA      | L |
| 5371 | PML    | 5925   | RB1       | L |
| 5371 | PML    | 5970   | RELA      | L |
| 5371 | PML    | 6135   | RPL11     | L |
| 5371 | PML    | 6497   | SKI       | L |

|      |         |        |          |   |
|------|---------|--------|----------|---|
| 5371 | PML     | 6613   | SUMO2    | L |
| 5371 | PML     | 6667   | SP1      | L |
| 5371 | PML     | 6722   | SRF      | L |
| 5371 | PML     | 6774   | STAT3    | L |
| 5371 | PML     | 6996   | TDG      | L |
| 5371 | PML     | 7046   | TGFBR1   | L |
| 5371 | PML     | 7048   | TGFBR2   | L |
| 5371 | PML     | 7067   | THRA     | L |
| 5371 | PML     | 7157   | TP53     | L |
| 5371 | PML     | 7161   | TP73     | L |
| 5371 | PML     | 7341   | SUMO1    | L |
| 5371 | PML     | 7704   | ZBTB16   | L |
| 5371 | PML     | 8805   | TRIM24   | L |
| 5371 | PML     | 8841   | HDAC3    | L |
| 5371 | PML     | 9372   | ZFYVE9   | L |
| 5371 | PML     | 9611   | NCOR1    | L |
| 5371 | PML     | 9612   | NCOR2    | L |
| 5371 | PML     | 11073  | TOPBP1   | L |
| 5371 | PML     | 25942  | SIN3A    | L |
| 5371 | PML     | 55743  | CHFR     | L |
| 5371 | PML     | 59343  | SENP2    | L |
| 5371 | PML     | 140691 | RNF36    | L |
| 5372 | PMM1    | 5870   | RAB6A    | R |
| 5376 | PMP22   | 5824   | PEX19    | L |
| 5393 | EXOSC9  | 7919   | BAT1     | L |
| 5393 | EXOSC9  | 51013  | EXOSC1   | L |
| 5394 | EXOSC10 | 6120   | RPE      | L |
| 5394 | EXOSC10 | 6499   | SKIV2L   | L |
| 5394 | EXOSC10 | 6749   | SSRP1    | L |
| 5394 | EXOSC10 | 9878   | C14orf92 | L |
| 5394 | EXOSC10 | 10438  | C1D      | L |
| 5394 | EXOSC10 | 10480  | hfl-B5   | L |
| 5394 | EXOSC10 | 10519  | CIB1     | L |
| 5394 | EXOSC10 | 10856  | RUVBL2   | L |
| 5394 | EXOSC10 | 22803  | XRN2     | L |
| 5394 | EXOSC10 | 22894  | KIAA1008 | L |
| 5394 | EXOSC10 | 23016  | EXOSC7   | L |
| 5394 | EXOSC10 | 23420  | NOMO1    | L |
| 5394 | EXOSC10 | 23435  | TARDBP   | L |
| 5394 | EXOSC10 | 23513  | SCRIB    | L |
| 5394 | EXOSC10 | 26019  | UPF2     | L |
| 5394 | EXOSC10 | 27005  | USP21    | L |
| 5394 | EXOSC10 | 27077  | EPPB9    | L |
| 5394 | EXOSC10 | 51691  | LSM8     | L |
| 5394 | EXOSC10 | 54464  | XRN1     | L |
| 5394 | EXOSC10 | 55572  | H17      | L |
| 5394 | EXOSC10 | 57819  | LSM2     | L |
| 5394 | EXOSC10 | 79586  | CHPF     | L |
| 5394 | EXOSC10 | 80142  | PTGES2   | L |
| 5394 | EXOSC10 | 83706  | URP2     | L |
| 5394 | EXOSC10 | 84641  | HIATL1   | L |
| 5394 | EXOSC10 | 118460 | EXOSC6   | L |
| 5396 | PRRX1   | 6722   | SRF      | L |
| 5411 | PNN     | 6429   | SFRS4    | L |
| 5411 | PNN     | 8899   | PRPF4B   | L |
| 5411 | PNN     | 10921  | RNPS1    | L |
| 5411 | PNN     | 23524  | SRRM2    | L |
| 5411 | PNN     | 25957  | C6orf111 | L |
| 5413 | SEPT5   | 6804   | STX1A    | L |
| 5413 | SEPT5   | 6810   | STX4A    | L |
| 5413 | SEPT5   | 11143  | MYST2    | S |
| 5413 | SEPT5   | 51691  | LSM8     | L |
| 5414 | SEPT4   | 6620   | SNCB     | L |
| 5414 | SEPT4   | 9627   | SNCAIP   | L |
| 5422 | POLA    | 5424   | POLD1    | L |
| 5422 | POLA    | 5426   | POLE     | L |
| 5422 | POLA    | 5925   | RB1      | L |



|      |         |        |          |   |
|------|---------|--------|----------|---|
| 5422 | POLA    | 7157   | TP53     | L |
| 5422 | POLA    | 7520   | XRCC5    | L |
| 5422 | POLA    | 8099   | CDK2AP1  | L |
| 5422 | POLA    | 23649  | POLA2    | L |
| 5422 | POLA    | 92797  | HELB     | L |
| 5423 | POLB    | 7088   | TLE1     | S |
| 5423 | POLB    | 7515   | XRCC1    | L |
| 5423 | POLB    | 11143  | MYST2    | S |
| 5423 | POLB    | 79661  | NEIL1    | L |
| 5424 | POLD1   | 5981   | RFC1     | L |
| 5424 | POLD1   | 7520   | XRCC5    | L |
| 5424 | POLD1   | 10714  | POLD3    | L |
| 5424 | POLD1   | 57562  | KIAA1377 | S |
| 5425 | POLD2   | 11157  | LSM6     | L |
| 5425 | POLD2   | 26073  | POLDIP2  | L |
| 5425 | POLD2   | 84271  | POLDIP3  | L |
| 5425 | POLD2   | 253980 | KCTD13   | L |
| 5426 | POLE    | 5884   | RAD17    | L |
| 5426 | POLE    | 8859   | STK19    | L |
| 5427 | POLE2   | 7088   | TLE1     | S |
| 5427 | POLE2   | 10524  | HTATIP   | S |
| 5427 | POLE2   | 11161  | C14orf1  | S |
| 5428 | POLG    | 6742   | SSBP1    | L |
| 5429 | POLH    | 8655   | DNCL1    | L |
| 5429 | POLH    | 51455  | REV1L    | L |
| 5430 | POLR2A  | 5435   | POLR2F   | L |
| 5430 | POLR2A  | 5976   | RENT1    | L |
| 5430 | POLR2A  | 6294   | SAFB     | L |
| 5430 | POLR2A  | 6595   | SMARCA2  | L |
| 5430 | POLR2A  | 6597   | SMARCA4  | L |
| 5430 | POLR2A  | 6598   | SMARCB1  | L |
| 5430 | POLR2A  | 6599   | SMARCC1  | L |
| 5430 | POLR2A  | 6601   | SMARCC2  | L |
| 5430 | POLR2A  | 6605   | SMARCE1  | L |
| 5430 | POLR2A  | 6829   | SUPT5H   | L |
| 5430 | POLR2A  | 6917   | TCEA1    | L |
| 5430 | POLR2A  | 7625   | ZNF74    | L |
| 5430 | POLR2A  | 9412   | SURB7    | L |
| 5430 | POLR2A  | 10915  | TCERG1   | L |
| 5430 | POLR2A  | 22906  | OIP106   | L |
| 5430 | POLR2A  | 27044  | SND1     | L |
| 5430 | POLR2A  | 58190  | CTDSP1   | L |
| 5430 | POLR2A  | 146705 | FLJ31528 | L |
| 5432 | POLR2C  | 6601   | SMARCC2  | S |
| 5432 | POLR2C  | 8614   | STC2     | S |
| 5432 | POLR2C  | 11161  | C14orf1  | S |
| 5432 | POLR2C  | 55284  | UBE2W    | S |
| 5432 | POLR2C  | 55791  | C1orf103 | S |
| 5434 | POLR2E  | 8725   | C19orf2  | L |
| 5436 | POLR2G  | 8859   | STK19    | L |
| 5439 | POLR2J  | 26574  | AATF     | L |
| 5441 | POLR2L  | 11007  | DIPA     | R |
| 5442 | POLRMT  | 51106  | TFB1M    | L |
| 5442 | POLRMT  | 64216  | TFB2M    | L |
| 5443 | POMC    | 7448   | VTN      | L |
| 5449 | POU1F1  | 8856   | NR1I2    | L |
| 5449 | POU1F1  | 9970   | NR1I3    | L |
| 5450 | POU2AF1 | 5451   | POU2F1   | L |
| 5450 | POU2AF1 | 5452   | POU2F2   | L |
| 5450 | POU2AF1 | 6477   | SIAH1    | L |
| 5450 | POU2AF1 | 6478   | SIAH2    | L |
| 5450 | POU2AF1 | 6580   | SLC22A1  | L |
| 5450 | POU2AF1 | 6582   | SLC22A2  | L |
| 5450 | POU2AF1 | 10923  | SUB1     | L |
| 5451 | POU2F1  | 5970   | RELA     | L |
| 5451 | POU2F1  | 6256   | RXRA     | L |
| 5451 | POU2F1  | 6621   | SNAPC4   | L |

|      |        |        |          |   |
|------|--------|--------|----------|---|
| 5451 | POU2F1 | 6657   | SOX2     | L |
| 5451 | POU2F1 | 6667   | SP1      | L |
| 5451 | POU2F1 | 6908   | TBP      | L |
| 5451 | POU2F1 | 9612   | NCOR2    | L |
| 5452 | POU2F2 | 6908   | TBP      | L |
| 5454 | POU3F2 | 6664   | SOX11    | L |
| 5454 | POU3F2 | 10084  | PQBP1    | L |
| 5455 | POU3F3 | 6664   | SOX11    | L |
| 5455 | POU3F3 | 23645  | PPP1R15A | S |
| 5460 | POU5F1 | 6657   | SOX2     | L |
| 5464 | PPA1   | 7157   | TP53     | S |
| 5464 | PPA1   | 9094   | UNC119   | S |
| 5464 | PPA1   | 9869   | SETDB1   | S |
| 5464 | PPA1   | 55062  | WIPI49   | S |
| 5465 | PPARA  | 5970   | RELA     | L |
| 5465 | PPARA  | 6256   | RXRA     | L |
| 5465 | PPARA  | 6258   | RXRG     | S |
| 5465 | PPARA  | 7818   | DAP3     | L |
| 5465 | PPARA  | 8202   | NCOA3    | L |
| 5465 | PPARA  | 8204   | NRIP1    | L |
| 5465 | PPARA  | 8648   | NCOA1    | L |
| 5465 | PPARA  | 9049   | AIP      | L |
| 5465 | PPARA  | 9611   | NCOR1    | L |
| 5465 | PPARA  | 9612   | NCOR2    | L |
| 5465 | PPARA  | 10062  | NR1H3    | L |
| 5465 | PPARA  | 10912  | GADD45G  | L |
| 5465 | PPARA  | 11214  | AKAP13   | L |
| 5465 | PPARA  | 29982  | NRBF2    | L |
| 5465 | PPARA  | 85441  | PRIC285  | L |
| 5465 | PPARA  | 246329 | STAC3    | R |
| 5467 | PPARD  | 9612   | NCOR2    | L |
| 5467 | PPARD  | 10912  | GADD45G  | L |
| 5467 | PPARD  | 51564  | HDAC7A   | L |
| 5468 | PPARG  | 5469   | PPARBP   | L |
| 5468 | PPARG  | 6256   | RXRA     | L |
| 5468 | PPARG  | 6258   | RXRG     | L |
| 5468 | PPARG  | 8031   | NCOA4    | L |
| 5468 | PPARG  | 8204   | NRIP1    | L |
| 5468 | PPARG  | 8431   | NROB2    | L |
| 5468 | PPARG  | 8648   | NCOA1    | L |
| 5468 | PPARG  | 8721   | EDF1     | L |
| 5468 | PPARG  | 8841   | HDAC3    | L |
| 5468 | PPARG  | 9862   | THRAP4   | L |
| 5468 | PPARG  | 10499  | NCOA2    | L |
| 5468 | PPARG  | 10891  | PPARGC1A | L |
| 5468 | PPARG  | 10902  | BRD8     | L |
| 5468 | PPARG  | 10912  | GADD45G  | L |
| 5468 | PPARG  | 23054  | NCOA6    | L |
| 5468 | PPARG  | 30836  | ERBP     | L |
| 5469 | PPARBP | 5914   | RARA     | L |
| 5469 | PPARBP | 6095   | RORA     | L |
| 5469 | PPARBP | 6256   | RXRA     | L |
| 5469 | PPARBP | 7068   | THRB     | L |
| 5469 | PPARBP | 7157   | TP53     | L |
| 5469 | PPARBP | 7421   | VDR      | L |
| 5469 | PPARBP | 7533   | YWHAH    | L |
| 5473 | PPBP   | 10063  | COX17    | S |
| 5473 | PPBP   | 10658  | CUGBP1   | S |
| 5473 | PPBP   | 23256  | SCFD1    | S |
| 5473 | PPBP   | 29888  | STRN4    | S |
| 5473 | PPBP   | 50813  | COPS7A   | S |
| 5478 | PPIA   | 5530   | PPP3CA   | L |
| 5478 | PPIA   | 5534   | PPP3R1   | L |
| 5478 | PPIA   | 5618   | PRLR     | L |
| 5478 | PPIA   | 5925   | RB1      | L |
| 5478 | PPIA   | 6279   | S100A8   | S |
| 5478 | PPIA   | 11098  | PRSS23   | S |

|      |        |        |               |   |
|------|--------|--------|---------------|---|
| 5478 | PPIA   | 20924  | (null)        | S |
| 5478 | PPIA   | 54458  | DKFZp564J157  | R |
| 5479 | PPIB   | 5617   | PRL           | L |
| 5479 | PPIB   | 6776   | STAT5A        | L |
| 5481 | PPID   | 9001   | HAP1          | S |
| 5481 | PPID   | 11143  | MYST2         | S |
| 5493 | PPL    | 6498   | SKIL          | L |
| 5493 | PPL    | 7431   | VIM           | L |
| 5493 | PPL    | 23254  | KIAA1026      | L |
| 5493 | PPL    | 51535  | PPHLN1        | L |
| 5495 | PPM1B  | 6885   | MAP3K7        | L |
| 5495 | PPM1B  | 8517   | IKBKG         | L |
| 5498 | PPOX   | 9001   | HAP1          | S |
| 5498 | PPOX   | 10989  | IMMT          | S |
| 5499 | PPP1CA | 5511   | PPP1R8        | L |
| 5499 | PPP1CA | 5514   | PPP1R10       | L |
| 5499 | PPP1CA | 5610   | EIF2AK2       | L |
| 5499 | PPP1CA | 5925   | RB1           | L |
| 5499 | PPP1CA | 6780   | STAU          | L |
| 5499 | PPP1CA | 7157   | TP53          | L |
| 5499 | PPP1CA | 7159   | TP53BP2       | L |
| 5499 | PPP1CA | 7991   | TUSC3         | L |
| 5499 | PPP1CA | 8027   | STAM          | L |
| 5499 | PPP1CA | 9372   | ZFYVE9        | L |
| 5499 | PPP1CA | 9765   | ZFYVE16       | L |
| 5499 | PPP1CA | 9858   | KIAA0649      | L |
| 5499 | PPP1CA | 10199  | MPHOSPH10     | L |
| 5499 | PPP1CA | 10848  | PPP1R13L      | L |
| 5499 | PPP1CA | 23189  | ANKRD15       | L |
| 5499 | PPP1CA | 23228  | PLCL2         | L |
| 5499 | PPP1CA | 23368  | PPP1R13B      | L |
| 5499 | PPP1CA | 23645  | PPP1R15A      | L |
| 5499 | PPP1CA | 26092  | TOR1AIP1      | L |
| 5499 | PPP1CA | 26508  | HEYL          | L |
| 5499 | PPP1CA | 54843  | SYTL2         | L |
| 5499 | PPP1CA | 57082  | CASC5         | L |
| 5499 | PPP1CA | 57683  | KIAA1571      | L |
| 5499 | PPP1CA | 57821  | C1orf114      | L |
| 5499 | PPP1CA | 64434  | NOM1          | L |
| 5499 | PPP1CA | 79660  | PPP1R3B       | L |
| 5499 | PPP1CA | 81566  | C12orf22      | L |
| 5499 | PPP1CA | 81930  | KIF18A        | L |
| 5499 | PPP1CA | 84687  | PPP1R9B       | L |
| 5499 | PPP1CA | 84919  | PPP1R15B      | L |
| 5499 | PPP1CA | 161742 | SPRED1        | L |
| 5499 | PPP1CA | 286262 | C9orf75       | L |
| 5500 | PPP1CB | 5747   | PTK2          | L |
| 5500 | PPP1CB | 9372   | ZFYVE9        | L |
| 5500 | PPP1CB | 54776  | PPP1R12C      | L |
| 5501 | PPP1CC | 5504   | PPP1R2        | L |
| 5501 | PPP1CC | 5509   | PPP1R3D       | L |
| 5501 | PPP1CC | 5610   | EIF2AK2       | L |
| 5501 | PPP1CC | 7159   | TP53BP2       | L |
| 5501 | PPP1CC | 9372   | ZFYVE9        | L |
| 5504 | PPP1R2 | 84687  | PPP1R9B       | L |
| 5510 | PPP1R7 | 284169 | (null)        | S |
| 5511 | PPP1R8 | 8614   | STC2          | S |
| 5511 | PPP1R8 | 8726   | EED           | L |
| 5511 | PPP1R8 | 9869   | SETDB1        | S |
| 5511 | PPP1R8 | 11161  | C14orf1       | S |
| 5511 | PPP1R8 | 84060  | DKFZP564O0523 | S |
| 5515 | PPP2CA | 5520   | PPP2R2A       | L |
| 5515 | PPP2CA | 5526   | PPP2R5B       | L |
| 5515 | PPP2CA | 5764   | PTN           | S |
| 5515 | PPP2CA | 7157   | TP53          | L |
| 5515 | PPP2CA | 9319   | TRIP13        | R |
| 5515 | PPP2CA | 51477  | ISYNA1        | S |

|      |         |        |               |   |
|------|---------|--------|---------------|---|
| 5515 | PPP2CA  | 64949  | MRPS26        | S |
| 5516 | PPP2CB  | 8312   | AXIN1         | L |
| 5518 | PPP2R1A | 5523   | PPP2R3A       | L |
| 5518 | PPP2R1A | 9372   | ZFYVE9        | L |
| 5518 | PPP2R1A | 10425  | ARIH2         | S |
| 5518 | PPP2R1A | 28227  | PPP2R3B       | L |
| 5519 | PPP2R1B | 5520   | PPP2R2A       | L |
| 5519 | PPP2R1B | 5527   | PPP2R5C       | L |
| 5519 | PPP2R1B | 10142  | AKAP9         | L |
| 5523 | PPP2R3A | 5933   | RBL1          | L |
| 5525 | PPP2R5A | 5610   | EIF2AK2       | L |
| 5525 | PPP2R5A | 6464   | SHC1          | L |
| 5525 | PPP2R5A | 7439   | VMD2          | L |
| 5526 | PPP2R5B | 8312   | AXIN1         | L |
| 5527 | PPP2R5C | 5580   | PRKCD         | L |
| 5527 | PPP2R5C | 8312   | AXIN1         | L |
| 5528 | PPP2R5D | 8500   | PPFIA1        | R |
| 5528 | PPP2R5D | 9464   | HAND2         | L |
| 5530 | PPP3CA  | 5534   | PPP3R1        | L |
| 5530 | PPP3CA  | 5590   | PRKCZ         | L |
| 5530 | PPP3CA  | 6647   | SOD1          | L |
| 5530 | PPP3CA  | 9495   | AKAP5         | L |
| 5530 | PPP3CA  | 23523  | CABIN1        | L |
| 5530 | PPP3CA  | 23770  | FKBP8         | L |
| 5530 | PPP3CA  | 51778  | MYOZ2         | L |
| 5530 | PPP3CA  | 404550 | MGC17624      | R |
| 5531 | PPP4C   | 5966   | REL           | L |
| 5531 | PPP4C   | 5970   | RELA          | L |
| 5531 | PPP4C   | 7114   | TMSB4X        | L |
| 5531 | PPP4C   | 9989   | PPP4R1        | L |
| 5531 | PPP4C   | 151987 | PPP4R2        | L |
| 5532 | PPP3CB  | 9021   | SOCS3         | L |
| 5532 | PPP3CB  | 23523  | CABIN1        | L |
| 5532 | PPP3CB  | 51778  | MYOZ2         | L |
| 5533 | PPP3CC  | 23523  | CABIN1        | L |
| 5534 | PPP3R1  | 51475  | CABP2         | L |
| 5536 | PPP5C   | 8881   | CDC16         | L |
| 5536 | PPP5C   | 8904   | CPNE1         | L |
| 5536 | PPP5C   | 10672  | GNA13         | L |
| 5536 | PPP5C   | 131034 | CPNE4         | L |
| 5536 | PPP5C   | 221184 | CPNE2         | L |
| 5540 | PPYR1   | 5697   | PYY           | L |
| 5540 | PPYR1   | 6262   | RYR2          | L |
| 5540 | PPYR1   | 23645  | PPP1R15A      | L |
| 5540 | PPYR1   | 84687  | PPP1R9B       | L |
| 5551 | PRF1    | 57062  | DDX24         | S |
| 5552 | PRG1    | 6348   | CCL3          | L |
| 5552 | PRG1    | 6449   | SGTA          | R |
| 5553 | PRG2    | 84060  | DKFZP564O0523 | S |
| 5557 | PRIM1   | 23649  | POLA2         | L |
| 5557 | PRIM1   | 64978  | MRPL38        | S |
| 5558 | PRIM2A  | 23649  | POLA2         | L |
| 5562 | PRKAA1  | 10953  | TOMM34        | L |
| 5563 | PRKAA2  | 6794   | STK11         | L |
| 5564 | PRKAB1  | 5571   | PRKAG1        | L |
| 5564 | PRKAB1  | 51422  | PRKAG2        | L |
| 5565 | PRKAB2  | 5571   | PRKAG1        | L |
| 5565 | PRKAB2  | 51422  | PRKAG2        | L |
| 5566 | PRKACA  | 5569   | PKIA          | L |
| 5566 | PRKACA  | 6262   | RYR2          | L |
| 5566 | PRKACA  | 9351   | SLC9A3R2      | L |
| 5566 | PRKACA  | 9464   | HAND2         | L |
| 5566 | PRKACA  | 51199  | NIN           | L |
| 5566 | PRKACA  | 158798 | AKAP14        | L |
| 5567 | PRKACB  | 5569   | PKIA          | L |
| 5567 | PRKACB  | 5570   | PKIB          | L |
| 5571 | PRKAG1  | 51422  | PRKAG2        | L |

|      |         |        |             |    |
|------|---------|--------|-------------|----|
| 5573 | PRKAR1A | 5575   | PRKAR1B     | L  |
| 5573 | PRKAR1A | 5613   | PRKX        | L  |
| 5573 | PRKAR1A | 8165   | AKAP1       | L  |
| 5573 | PRKAR1A | 8852   | AKAP4       | L  |
| 5573 | PRKAR1A | 10564  | ARFGEF2     | L  |
| 5573 | PRKAR1A | 11215  | AKAP11      | L  |
| 5573 | PRKAR1A | 11216  | AKAP10      | RL |
| 5573 | PRKAR1A | 29108  | PYCARD      | R  |
| 5573 | PRKAR1A | 55660  | FNBP3       | L  |
| 5573 | PRKAR1A | 79666  | PLEKHF2     | R  |
| 5573 | PRKAR1A | 84281  | MGC13057    | R  |
| 5575 | PRKAR1B | 7486   | WRN         | L  |
| 5575 | PRKAR1B | 8165   | AKAP1       | L  |
| 5576 | PRKAR2A | 5613   | PRKX        | L  |
| 5576 | PRKAR2A | 6262   | RYR2        | L  |
| 5576 | PRKAR2A | 6344   | SCTR        | L  |
| 5576 | PRKAR2A | 6407   | SEMG2       | L  |
| 5576 | PRKAR2A | 7430   | VIL2        | L  |
| 5576 | PRKAR2A | 8165   | AKAP1       | L  |
| 5576 | PRKAR2A | 8936   | WASF1       | L  |
| 5576 | PRKAR2A | 9472   | AKAP6       | L  |
| 5576 | PRKAR2A | 9495   | AKAP5       | L  |
| 5576 | PRKAR2A | 9590   | AKAP12      | L  |
| 5576 | PRKAR2A | 10142  | AKAP9       | L  |
| 5576 | PRKAR2A | 10270  | AKAP8       | L  |
| 5576 | PRKAR2A | 10564  | ARFGEF2     | L  |
| 5576 | PRKAR2A | 10566  | AKAP3       | L  |
| 5576 | PRKAR2A | 11214  | AKAP13      | L  |
| 5576 | PRKAR2A | 11215  | AKAP11      | L  |
| 5576 | PRKAR2A | 11216  | AKAP10      | L  |
| 5576 | PRKAR2A | 26960  | NBEA        | L  |
| 5576 | PRKAR2A | 84073  | MYCBPAP     | L  |
| 5576 | PRKAR2A | 158798 | AKAP14      | L  |
| 5576 | PRKAR2A | 445815 | PALM2-AKAP2 | L  |
| 5577 | PRKAR2B | 8852   | AKAP4       | L  |
| 5577 | PRKAR2B | 9495   | AKAP5       | L  |
| 5577 | PRKAR2B | 10142  | AKAP9       | L  |
| 5577 | PRKAR2B | 11215  | AKAP11      | L  |
| 5577 | PRKAR2B | 11216  | AKAP10      | L  |
| 5577 | PRKAR2B | 26960  | NBEA        | L  |
| 5577 | PRKAR2B | 89876  | C3orf15     | L  |
| 5577 | PRKAR2B | 158798 | AKAP14      | L  |
| 5578 | PRKCA   | 5879   | RAC1        | L  |
| 5578 | PRKCA   | 5997   | RGS2        | L  |
| 5578 | PRKCA   | 6344   | SCTR        | L  |
| 5578 | PRKCA   | 6406   | SEMG1       | L  |
| 5578 | PRKCA   | 6407   | SEMG2       | L  |
| 5578 | PRKCA   | 6505   | SLC1A1      | L  |
| 5578 | PRKCA   | 6624   | FSCN1       | L  |
| 5578 | PRKCA   | 7011   | TEP1        | L  |
| 5578 | PRKCA   | 7015   | TERT        | L  |
| 5578 | PRKCA   | 7074   | TIAM1       | L  |
| 5578 | PRKCA   | 7157   | TP53        | L  |
| 5578 | PRKCA   | 7430   | VIL2        | L  |
| 5578 | PRKCA   | 7532   | YWHAG       | L  |
| 5578 | PRKCA   | 7534   | YWHAZ       | L  |
| 5578 | PRKCA   | 8436   | SDPR        | L  |
| 5578 | PRKCA   | 8525   | DGKZ        | L  |
| 5578 | PRKCA   | 9138   | ARHGEF1     | L  |
| 5578 | PRKCA   | 9260   | PDLIM7      | L  |
| 5578 | PRKCA   | 9464   | HAND2       | L  |
| 5578 | PRKCA   | 9590   | AKAP12      | L  |
| 5578 | PRKCA   | 10399  | GNB2L1      | L  |
| 5578 | PRKCA   | 11033  | CENTA1      | L  |
| 5578 | PRKCA   | 23650  | TRIM29      | L  |
| 5578 | PRKCA   | 23704  | KCNE4       | L  |
| 5578 | PRKCA   | 60312  | AFAP        | L  |

|      |        |       |          |   |
|------|--------|-------|----------|---|
| 5579 | PRKCB1 | 5597  | MAPK6    | L |
| 5579 | PRKCB1 | 5997  | RGS2     | L |
| 5579 | PRKCB1 | 6709  | SPTAN1   | L |
| 5579 | PRKCB1 | 7532  | YWHAG    | L |
| 5579 | PRKCB1 | 9260  | PDLIM7   | L |
| 5579 | PRKCB1 | 10399 | GNB2L1   | L |
| 5579 | PRKCB1 | 10611 | PDLIM5   | L |
| 5579 | PRKCB1 | 10672 | GNA13    | L |
| 5579 | PRKCB1 | 23613 | PRKCBP1  | L |
| 5579 | PRKCB1 | 54101 | RIPK4    | L |
| 5579 | PRKCB1 | 60312 | AFAP     | L |
| 5580 | PRKCD  | 5591  | PRKDC    | L |
| 5580 | PRKCD  | 5777  | PTPN6    | L |
| 5580 | PRKCD  | 6464  | SHC1     | L |
| 5580 | PRKCD  | 7074  | TIAM1    | L |
| 5580 | PRKCD  | 7532  | YWHAG    | L |
| 5580 | PRKCD  | 8754  | ADAM9    | L |
| 5580 | PRKCD  | 10672 | GNA13    | L |
| 5580 | PRKCD  | 54101 | RIPK4    | L |
| 5580 | PRKCD  | 57048 | PLSCR3   | L |
| 5580 | PRKCD  | 60312 | AFAP     | L |
| 5581 | PRKCE  | 5594  | MAPK1    | L |
| 5581 | PRKCE  | 5894  | RAF1     | L |
| 5581 | PRKCE  | 6622  | SNCA     | L |
| 5581 | PRKCE  | 6714  | SRC      | L |
| 5581 | PRKCE  | 7074  | TIAM1    | L |
| 5581 | PRKCE  | 7416  | VDAC1    | L |
| 5581 | PRKCE  | 9276  | COPB2    | L |
| 5581 | PRKCE  | 10399 | GNB2L1   | L |
| 5581 | PRKCE  | 10611 | PDLIM5   | L |
| 5581 | PRKCE  | 10672 | GNA13    | L |
| 5581 | PRKCE  | 60312 | AFAP     | L |
| 5582 | PRKCG  | 5997  | RGS2     | L |
| 5582 | PRKCG  | 7074  | TIAM1    | L |
| 5582 | PRKCG  | 7532  | YWHAG    | L |
| 5582 | PRKCG  | 10611 | PDLIM5   | L |
| 5582 | PRKCG  | 60312 | AFAP     | L |
| 5584 | PRKCI  | 5607  | MAP2K5   | L |
| 5584 | PRKCI  | 8878  | SQSTM1   | L |
| 5584 | PRKCI  | 11033 | CENTA1   | L |
| 5584 | PRKCI  | 23049 | SMG1     | L |
| 5584 | PRKCI  | 50855 | PARD6A   | R |
| 5584 | PRKCI  | 84552 | PARD6G   | L |
| 5585 | PKN1   | 7431  | VIM      | L |
| 5585 | PKN1   | 10142 | AKAP9    | L |
| 5585 | PKN1   | 11007 | DIPA     | R |
| 5585 | PKN1   | 23092 | ARHGAP26 | L |
| 5585 | PKN1   | 79658 | ARHGAP10 | L |
| 5586 | PKN2   | 5783  | PTPN13   | L |
| 5586 | PKN2   | 8440  | NCK2     | L |
| 5586 | PKN2   | 10746 | MAP3K2   | L |
| 5587 | PRKD1  | 5599  | MAPK8    | L |
| 5587 | PRKD1  | 5601  | MAPK9    | L |
| 5587 | PRKD1  | 10971 | YWHAQ    | L |
| 5587 | PRKD1  | 11033 | CENTA1   | L |
| 5588 | PRKCQ  | 7409  | VAV1     | L |
| 5588 | PRKCQ  | 7532  | YWHAG    | L |
| 5588 | PRKCQ  | 10539 | TXNL2    | L |
| 5589 | PRKCSH | 5788  | PTPRC    | L |
| 5589 | PRKCSH | 5997  | RGS2     | S |
| 5589 | PRKCSH | 23193 | GANAB    | L |
| 5589 | PRKCSH | 51608 | C7orf20  | S |
| 5590 | PRKCZ  | 5607  | MAP2K5   | L |
| 5590 | PRKCZ  | 5894  | RAF1     | L |
| 5590 | PRKCZ  | 5970  | RELA     | L |
| 5590 | PRKCZ  | 6714  | SRC      | L |
| 5590 | PRKCZ  | 7189  | TRAF6    | L |

|      |       |       |           |    |
|------|-------|-------|-----------|----|
| 5590 | PRKCZ | 7529  | YWHAB     | L  |
| 5590 | PRKCZ | 8471  | IRS4      | L  |
| 5590 | PRKCZ | 8772  | FADD      | L  |
| 5590 | PRKCZ | 8878  | SQSTM1    | L  |
| 5590 | PRKCZ | 9260  | PDLIM7    | L  |
| 5590 | PRKCZ | 9637  | FEZ2      | L  |
| 5590 | PRKCZ | 9638  | FEZ1      | L  |
| 5590 | PRKCZ | 10000 | AKT3      | L  |
| 5590 | PRKCZ | 11033 | CENTA1    | L  |
| 5590 | PRKCZ | 23286 | KIBRA     | L  |
| 5590 | PRKCZ | 50855 | PARD6A    | RL |
| 5590 | PRKCZ | 60312 | AFAP      | L  |
| 5590 | PRKCZ | 84552 | PARD6G    | L  |
| 5591 | PRKDC | 5599  | MAPK8     | L  |
| 5591 | PRKDC | 6117  | RPA1      | L  |
| 5591 | PRKDC | 6118  | RPA2      | L  |
| 5591 | PRKDC | 7157  | TP53      | L  |
| 5591 | PRKDC | 7486  | WRN       | L  |
| 5591 | PRKDC | 8894  | EIF2S2    | L  |
| 5591 | PRKDC | 10438 | C1D       | L  |
| 5591 | PRKDC | 10519 | CIB1      | L  |
| 5591 | PRKDC | 64421 | DCLRE1C   | L  |
| 5592 | PRKG1 | 5997  | RGS2      | L  |
| 5594 | MAPK1 | 5604  | MAP2K1    | L  |
| 5594 | MAPK1 | 5605  | MAP2K2    | L  |
| 5594 | MAPK1 | 5778  | PTPN7     | L  |
| 5594 | MAPK1 | 5794  | PTPRH     | L  |
| 5594 | MAPK1 | 5801  | PTPRR     | L  |
| 5594 | MAPK1 | 6195  | RPS6KA1   | L  |
| 5594 | MAPK1 | 6196  | RPS6KA2   | L  |
| 5594 | MAPK1 | 6197  | RPS6KA3   | L  |
| 5594 | MAPK1 | 6464  | SHC1      | L  |
| 5594 | MAPK1 | 6622  | SNCA      | L  |
| 5594 | MAPK1 | 6623  | SNCG      | L  |
| 5594 | MAPK1 | 6721  | SREBF2    | L  |
| 5594 | MAPK1 | 6776  | STAT5A    | L  |
| 5594 | MAPK1 | 6777  | STAT5B    | L  |
| 5594 | MAPK1 | 7175  | TPR       | L  |
| 5594 | MAPK1 | 7409  | VAV1      | L  |
| 5594 | MAPK1 | 8462  | KLF11     | L  |
| 5594 | MAPK1 | 8550  | MAPKAPK5  | L  |
| 5594 | MAPK1 | 8569  | MKNK1     | L  |
| 5594 | MAPK1 | 8600  | TNFSF11   | L  |
| 5594 | MAPK1 | 8649  | MAP2K1IP1 | L  |
| 5594 | MAPK1 | 8682  | PEA15     | L  |
| 5594 | MAPK1 | 8870  | IER3      | L  |
| 5594 | MAPK1 | 8986  | RPS6KA4   | L  |
| 5594 | MAPK1 | 9149  | DYRK1B    | L  |
| 5594 | MAPK1 | 9759  | HDAC4     | L  |
| 5594 | MAPK1 | 10140 | TOB1      | L  |
| 5594 | MAPK1 | 10318 | TNIP1     | L  |
| 5594 | MAPK1 | 51366 | EDD1      | L  |
| 5594 | MAPK1 | 80824 | DUSP16    | L  |
| 5594 | MAPK1 | 84867 | PTPN5     | L  |
| 5595 | MAPK3 | 5604  | MAP2K1    | L  |
| 5595 | MAPK3 | 5605  | MAP2K2    | L  |
| 5595 | MAPK3 | 5606  | MAP2K3    | L  |
| 5595 | MAPK3 | 5778  | PTPN7     | L  |
| 5595 | MAPK3 | 5801  | PTPRR     | L  |
| 5595 | MAPK3 | 6195  | RPS6KA1   | L  |
| 5595 | MAPK3 | 6196  | RPS6KA2   | L  |
| 5595 | MAPK3 | 6197  | RPS6KA3   | L  |
| 5595 | MAPK3 | 6623  | SNCG      | L  |
| 5595 | MAPK3 | 6689  | SPIB      | L  |
| 5595 | MAPK3 | 6721  | SREBF2    | L  |
| 5595 | MAPK3 | 6887  | TAL2      | L  |
| 5595 | MAPK3 | 7054  | TH        | L  |

|      |        |        |           |   |
|------|--------|--------|-----------|---|
| 5595 | MAPK3  | 7157   | TP53      | L |
| 5595 | MAPK3  | 8600   | TNFSF11   | L |
| 5595 | MAPK3  | 8649   | MAP2K1IP1 | L |
| 5595 | MAPK3  | 8682   | PEA15     | L |
| 5595 | MAPK3  | 8870   | IER3      | L |
| 5595 | MAPK3  | 8986   | RPS6KA4   | L |
| 5595 | MAPK3  | 9759   | HDAC4     | L |
| 5595 | MAPK3  | 10174  | SORBS3    | L |
| 5595 | MAPK3  | 84867  | PTPN5     | L |
| 5598 | MAPK7  | 5607   | MAP2K5    | L |
| 5598 | MAPK7  | 5801   | PTPRR     | L |
| 5598 | MAPK7  | 5894   | RAF1      | L |
| 5598 | MAPK7  | 6446   | SGK       | L |
| 5598 | MAPK7  | 7529   | YWHAB     | L |
| 5599 | MAPK8  | 5609   | MAP2K7    | L |
| 5599 | MAPK8  | 5966   | REL       | L |
| 5599 | MAPK8  | 6416   | MAP2K4    | L |
| 5599 | MAPK8  | 6623   | SNCG      | L |
| 5599 | MAPK8  | 6689   | SPIB      | L |
| 5599 | MAPK8  | 6885   | MAP3K7    | L |
| 5599 | MAPK8  | 7157   | TP53      | L |
| 5599 | MAPK8  | 8518   | IKBKAP    | L |
| 5599 | MAPK8  | 8600   | TNFSF11   | L |
| 5599 | MAPK8  | 9043   | SPAG9     | L |
| 5599 | MAPK8  | 9318   | COPS2     | L |
| 5599 | MAPK8  | 9466   | IL27RA    | L |
| 5599 | MAPK8  | 9467   | SH3BP5    | L |
| 5599 | MAPK8  | 9479   | MAPK8IP1  | L |
| 5599 | MAPK8  | 10746  | MAP3K2    | L |
| 5599 | MAPK8  | 23542  | MAPK8IP2  | L |
| 5599 | MAPK8  | 80824  | DUSP16    | L |
| 5600 | MAPK11 | 8841   | HDAC3     | L |
| 5600 | MAPK11 | 80824  | DUSP16    | L |
| 5601 | MAPK9  | 5925   | RB1       | L |
| 5601 | MAPK9  | 7157   | TP53      | L |
| 5601 | MAPK9  | 7186   | TRAF2     | L |
| 5601 | MAPK9  | 7511   | XPNPEP1   | S |
| 5601 | MAPK9  | 7597   | ZBTB25    | R |
| 5601 | MAPK9  | 8550   | MAPKAPK5  | L |
| 5601 | MAPK9  | 9467   | SH3BP5    | L |
| 5601 | MAPK9  | 10262  | SF3B4     | R |
| 5601 | MAPK9  | 11016  | ATF7      | L |
| 5601 | MAPK9  | 23039  | XPO7      | S |
| 5601 | MAPK9  | 57562  | KIAA1377  | S |
| 5601 | MAPK9  | 80817  | KIAA1712  | R |
| 5601 | MAPK9  | 80824  | DUSP16    | L |
| 5601 | MAPK9  | 284403 | WDR62     | R |
| 5602 | MAPK10 | 7157   | TP53      | L |
| 5602 | MAPK10 | 9094   | UNC119    | S |
| 5602 | MAPK10 | 9467   | SH3BP5    | L |
| 5602 | MAPK10 | 80824  | DUSP16    | L |
| 5603 | MAPK13 | 7867   | MAPKAPK3  | L |
| 5603 | MAPK13 | 8550   | MAPKAPK5  | L |
| 5603 | MAPK13 | 23542  | MAPK8IP2  | L |
| 5604 | MAP2K1 | 5894   | RAF1      | L |
| 5604 | MAP2K1 | 6196   | RPS6KA2   | L |
| 5604 | MAP2K1 | 7187   | TRAF3     | L |
| 5604 | MAP2K1 | 8649   | MAP2K1IP1 | L |
| 5604 | MAP2K1 | 8904   | CPNE1     | L |
| 5604 | MAP2K1 | 131034 | CPNE4     | L |
| 5604 | MAP2K1 | 157310 | PEBP4     | L |
| 5605 | MAP2K2 | 5894   | RAF1      | L |
| 5605 | MAP2K2 | 8649   | MAP2K1IP1 | L |
| 5606 | MAP2K3 | 23542  | MAPK8IP2  | L |
| 5608 | MAP2K6 | 6885   | MAP3K7    | L |
| 5609 | MAP2K7 | 7786   | MAP3K12   | L |
| 5609 | MAP2K7 | 9479   | MAPK8IP1  | L |



|      |         |        |               |    |
|------|---------|--------|---------------|----|
| 5609 | MAP2K7  | 10746  | MAP3K2        | L  |
| 5609 | MAP2K7  | 23542  | MAPK8IP2      | L  |
| 5609 | MAP2K7  | 51776  | ZAK           | L  |
| 5610 | EIF2AK2 | 5611   | DNAJC3        | L  |
| 5610 | EIF2AK2 | 6772   | STAT1         | L  |
| 5610 | EIF2AK2 | 6774   | STAT3         | L  |
| 5610 | EIF2AK2 | 6895   | TARBP2        | L  |
| 5610 | EIF2AK2 | 7157   | TP53          | L  |
| 5610 | EIF2AK2 | 8575   | PRKRA         | L  |
| 5610 | EIF2AK2 | 10728  | PTGES3        | L  |
| 5610 | EIF2AK2 | 10988  | METAP2        | L  |
| 5610 | EIF2AK2 | 79706  | PRKRIP1       | L  |
| 5610 | EIF2AK2 | 114609 | TIRAP         | L  |
| 5611 | DNAJC3  | 5612   | PRKRIR        | L  |
| 5611 | DNAJC3  | 9451   | EIF2AK3       | L  |
| 5612 | PRKRIR  | 6789   | STK4          | L  |
| 5617 | PRL     | 5618   | PRLR          | L  |
| 5618 | PRLR    | 5781   | PTPN11        | L  |
| 5618 | PRLR    | 7006   | TEC           | L  |
| 5618 | PRLR    | 7409   | VAV1          | L  |
| 5618 | PRLR    | 7535   | ZAP70         | L  |
| 5618 | PRLR    | 8835   | SOCS2         | L  |
| 5618 | PRLR    | 9021   | SOCS3         | L  |
| 5621 | PRNP    | 7917   | BAT3          | S  |
| 5621 | PRNP    | 10963  | STIP1         | L  |
| 5623 | PSPN    | 64096  | GFRA4         | L  |
| 5624 | PROC    | 5627   | PROS1         | L  |
| 5624 | PROC    | 7056   | THBD          | L  |
| 5624 | PROC    | 10544  | PROCR         | L  |
| 5626 | PROP1   | 8820   | HESX1         | L  |
| 5627 | PROS1   | 7301   | TYRO3         | L  |
| 5630 | PRPH    | 5961   | RDS           | L  |
| 5631 | PRPS1   | 5635   | PRPSAP1       | RL |
| 5631 | PRPS1   | 26003  | GORASP2       | R  |
| 5631 | PRPS1   | 51324  | SPG21         | R  |
| 5634 | PRPS2   | 5635   | PRPSAP1       | L  |
| 5635 | PRPSAP1 | 11269  | DDX19B        | S  |
| 5635 | PRPSAP1 | 79666  | PLEKHF2       | R  |
| 5636 | PRPSAP2 | 284131 | FLJ35220      | S  |
| 5639 | PRRG2   | 5829   | PXN           | L  |
| 5639 | PRRG2   | 7414   | VCL           | L  |
| 5644 | PRSS1   | 7263   | TST           | L  |
| 5644 | PRSS1   | 11005  | SPINK5        | L  |
| 5645 | PRSS2   | 6590   | SLPI          | L  |
| 5646 | PRSS3   | 7035   | TFPI          | L  |
| 5649 | RELN    | 7436   | VLDLR         | L  |
| 5649 | RELN    | 7804   | LRP8          | L  |
| 5651 | PRSS7   | 6690   | SPINK1        | L  |
| 5652 | PRSS8   | 55729  | ATF7IP        | L  |
| 5654 | HTRA1   | 55603  | FAM46A        | L  |
| 5655 | KLK10   | 55791  | C1orf103      | S  |
| 5657 | PRTN3   | 7124   | TNF           | L  |
| 5660 | PSAP    | 9620   | CELSR1        | S  |
| 5660 | PSAP    | 10980  | COPS6         | S  |
| 5660 | PSAP    | 23764  | MAFF          | S  |
| 5660 | PSAP    | 157285 | DKFZp761P0423 | S  |
| 5662 | PSD     | 9535   | GMFG          | S  |
| 5662 | PSD     | 10681  | GNB5          | S  |
| 5662 | PSD     | 57799  | RAB40C        | S  |
| 5662 | PSD     | 162952 | (null)        | S  |
| 5662 | PSD     | 284004 | FLJ23825      | S  |
| 5663 | PSEN1   | 6134   | RPL10         | L  |
| 5663 | PSEN1   | 6934   | TCF7L2        | L  |
| 5663 | PSEN1   | 7087   | ICAM5         | L  |
| 5663 | PSEN1   | 8502   | PKP4          | L  |
| 5663 | PSEN1   | 8766   | RAB11A        | L  |
| 5663 | PSEN1   | 9709   | HERPUD1       | L  |

|      |        |        |          |    |
|------|--------|--------|----------|----|
| 5663 | PSEN1  | 10519  | CIB1     | L  |
| 5663 | PSEN1  | 10730  | YME1L1   | L  |
| 5663 | PSEN1  | 23385  | NCSTN    | L  |
| 5663 | PSEN1  | 23621  | BACE1    | L  |
| 5663 | PSEN1  | 29979  | UBQLN1   | L  |
| 5663 | PSEN1  | 30818  | CSEN     | L  |
| 5663 | PSEN1  | 51107  | APH1A    | L  |
| 5663 | PSEN1  | 55294  | FBXW7    | L  |
| 5663 | PSEN1  | 55798  | METTTL2  | L  |
| 5663 | PSEN1  | 55851  | PSENEEN  | L  |
| 5663 | PSEN1  | 83464  | APH1B    | L  |
| 5664 | PSEN2  | 6717   | SRI      | L  |
| 5664 | PSEN2  | 7087   | ICAM5    | L  |
| 5664 | PSEN2  | 10519  | CIB1     | L  |
| 5664 | PSEN2  | 23385  | NCSTN    | L  |
| 5664 | PSEN2  | 29979  | UBQLN1   | L  |
| 5664 | PSEN2  | 30818  | CSEN     | L  |
| 5664 | PSEN2  | 51107  | APH1A    | L  |
| 5664 | PSEN2  | 55798  | METTTL2  | L  |
| 5664 | PSEN2  | 55851  | PSENEEN  | L  |
| 5664 | PSEN2  | 83464  | APH1B    | L  |
| 5669 | PSG1   | 10813  | UTP14A   | S  |
| 5671 | PSG3   | 6498   | SKIL     | L  |
| 5671 | PSG3   | 25865  | PRKD2    | L  |
| 5671 | PSG3   | 55603  | FAM46A   | L  |
| 5671 | PSG3   | 55729  | ATF7IP   | L  |
| 5673 | PSG5   | 55660  | FBNP3    | L  |
| 5678 | PSG9   | 5782   | PTPN12   | L  |
| 5678 | PSG9   | 55791  | C1orf103 | S  |
| 5682 | PSMA1  | 5688   | PSMA7    | L  |
| 5682 | PSMA1  | 7431   | VIM      | R  |
| 5682 | PSMA1  | 9111   | NMI      | R  |
| 5682 | PSMA1  | 10241  | NDP52    | R  |
| 5682 | PSMA1  | 10301  | DLEU1    | S  |
| 5682 | PSMA1  | 11007  | DIPA     | R  |
| 5682 | PSMA1  | 25788  | RAD54B   | R  |
| 5682 | PSMA1  | 54550  | EFCBP2   | R  |
| 5682 | PSMA1  | 79096  | MGC4707  | S  |
| 5682 | PSMA1  | 79734  | KCTD17   | R  |
| 5682 | PSMA1  | 81628  | TSC22D4  | R  |
| 5683 | PSMA2  | 5685   | PSMA4    | L  |
| 5683 | PSMA2  | 5688   | PSMA7    | L  |
| 5683 | PSMA2  | 5699   | PSMB10   | L  |
| 5683 | PSMA2  | 7414   | VCL      | L  |
| 5684 | PSMA3  | 5687   | PSMA6    | S  |
| 5684 | PSMA3  | 5688   | PSMA7    | L  |
| 5684 | PSMA3  | 6628   | SNRPB    | S  |
| 5684 | PSMA3  | 6636   | SNRPF    | S  |
| 5684 | PSMA3  | 7916   | BAT2     | L  |
| 5684 | PSMA3  | 8676   | STX11    | S  |
| 5684 | PSMA3  | 22803  | XRN2     | L  |
| 5685 | PSMA4  | 5688   | PSMA7    | L  |
| 5687 | PSMA6  | 5688   | PSMA7    | L  |
| 5688 | PSMA7  | 5700   | PSMC1    | L  |
| 5689 | PSMB1  | 7414   | VCL      | L  |
| 5689 | PSMB1  | 118460 | EXOSC6   | L  |
| 5689 | PSMB1  | 167227 | DCP2     | L  |
| 5693 | PSMB5  | 27257  | LSM1     | L  |
| 5695 | PSMB7  | 10436  | C2F      | S  |
| 5696 | PSMB8  | 27257  | LSM1     | L  |
| 5698 | PSMB9  | 5699   | PSMB10   | L  |
| 5699 | PSMB10 | 5764   | PTN      | S  |
| 5700 | PSMC1  | 5701   | PSMC2    | L  |
| 5700 | PSMC1  | 5708   | PSMD2    | RL |
| 5700 | PSMC1  | 5711   | PSMD5    | L  |
| 5700 | PSMC1  | 5713   | PSMD7    | L  |
| 5700 | PSMC1  | 6314   | ATXN7    | L  |

|      |        |        |               |    |
|------|--------|--------|---------------|----|
| 5700 | PSMC1  | 7415   | VCP           | L  |
| 5700 | PSMC1  | 11007  | DIPA          | R  |
| 5701 | PSMC2  | 5704   | PSMC4         | L  |
| 5701 | PSMC2  | 5708   | PSMD2         | L  |
| 5701 | PSMC2  | 5711   | PSMD5         | RL |
| 5701 | PSMC2  | 6498   | SKIL          | L  |
| 5701 | PSMC2  | 6908   | TBP           | L  |
| 5701 | PSMC2  | 81488  | GRINL1A       | S  |
| 5702 | PSMC3  | 5704   | PSMC4         | L  |
| 5702 | PSMC3  | 5705   | PSMC5         | L  |
| 5702 | PSMC3  | 7428   | VHL           | L  |
| 5702 | PSMC3  | 8676   | STX11         | S  |
| 5702 | PSMC3  | 10587  | TXNRD2        | L  |
| 5704 | PSMC4  | 5705   | PSMC5         | R  |
| 5704 | PSMC4  | 5716   | PSMD10        | RL |
| 5705 | PSMC5  | 6095   | RORA          | R  |
| 5705 | PSMC5  | 6667   | SP1           | L  |
| 5705 | PSMC5  | 7068   | THRB          | L  |
| 5705 | PSMC5  | 7138   | TNNT1         | R  |
| 5706 | PSMC6  | 5715   | PSMD9         | R  |
| 5706 | PSMC6  | 11007  | DIPA          | R  |
| 5706 | PSMC6  | 127703 | FLJ38984      | R  |
| 5708 | PSMD2  | 5711   | PSMD5         | L  |
| 5708 | PSMD2  | 5764   | PTN           | S  |
| 5708 | PSMD2  | 7132   | TNFRSF1A      | L  |
| 5708 | PSMD2  | 7704   | ZBTB16        | S  |
| 5708 | PSMD2  | 9094   | UNC119        | S  |
| 5708 | PSMD2  | 55791  | C1orf103      | S  |
| 5708 | PSMD2  | 134510 | UBLCP1        | R  |
| 5710 | PSMD4  | 5886   | RAD23A        | L  |
| 5710 | PSMD4  | 5887   | RAD23B        | L  |
| 5710 | PSMD4  | 6929   | TCF3          | L  |
| 5710 | PSMD4  | 11228  | RASSF8        | R  |
| 5710 | PSMD4  | 29978  | UBQLN2        | L  |
| 5710 | PSMD4  | 51667  | NYREN18       | L  |
| 5713 | PSMD7  | 5861   | RAB1A         | S  |
| 5714 | PSMD8  | 51377  | UCHL5         | L  |
| 5715 | PSMD9  | 6929   | TCF3          | L  |
| 5717 | PSMD11 | 5764   | PTN           | S  |
| 5717 | PSMD11 | 5796   | PTPRK         | S  |
| 5717 | PSMD11 | 7088   | TLE1          | S  |
| 5717 | PSMD11 | 7157   | TP53          | S  |
| 5717 | PSMD11 | 7280   | TUBB2         | S  |
| 5717 | PSMD11 | 7704   | ZBTB16        | S  |
| 5717 | PSMD11 | 9001   | HAP1          | S  |
| 5717 | PSMD11 | 9094   | UNC119        | S  |
| 5717 | PSMD11 | 9869   | SETDB1        | S  |
| 5717 | PSMD11 | 10980  | COPS6         | S  |
| 5717 | PSMD11 | 11244  | ZHX1          | S  |
| 5717 | PSMD11 | 29117  | BRD7          | S  |
| 5717 | PSMD11 | 51003  | MED31         | S  |
| 5717 | PSMD11 | 54462  | KIAA1128      | S  |
| 5717 | PSMD11 | 55791  | C1orf103      | S  |
| 5717 | PSMD11 | 60492  | MDS025        | S  |
| 5717 | PSMD11 | 84060  | DKFZP564O0523 | S  |
| 5717 | PSMD11 | 84966  | IGSF21        | S  |
| 5717 | PSMD11 | 222019 | (null)        | S  |
| 5720 | PSME1  | 5721   | PSME2         | RL |
| 5720 | PSME1  | 7414   | VCL           | S  |
| 5720 | PSME1  | 7431   | VIM           | S  |
| 5720 | PSME1  | 10383  | TUBB2         | S  |
| 5720 | PSME1  | 10436  | C2F           | S  |
| 5720 | PSME1  | 23326  | USP22         | S  |
| 5724 | PTAFR  | 5999   | RGS4          | L  |
| 5725 | PTBP1  | 5829   | PXN           | L  |
| 5725 | PTBP1  | 6421   | SFPQ          | L  |
| 5725 | PTBP1  | 6626   | SNRPA         | R  |

|      |       |        |           |   |
|------|-------|--------|-----------|---|
| 5725 | PTBP1 | 8570   | KHSRP     | L |
| 5725 | PTBP1 | 10241  | NDP52     | R |
| 5725 | PTBP1 | 125950 | RAVER1    | L |
| 5727 | PTCH  | 6469   | SHH       | L |
| 5727 | PTCH  | 6608   | SMO       | L |
| 5727 | PTCH  | 28996  | HIPK2     | L |
| 5727 | PTCH  | 50846  | DHH       | L |
| 5728 | PTEN  | 5747   | PTK2      | L |
| 5728 | PTEN  | 5829   | PXN       | L |
| 5728 | PTEN  | 7157   | TP53      | L |
| 5728 | PTEN  | 7332   | UBE2L3    | L |
| 5728 | PTEN  | 9961   | MVP       | L |
| 5728 | PTEN  | 10813  | UTP14A    | S |
| 5728 | PTEN  | 10980  | COPS6     | S |
| 5728 | PTEN  | 260425 | MAGI3     | L |
| 5730 | PTGDS | 5737   | PTGFR     | L |
| 5739 | PTGIR | 55811  | SAC       | L |
| 5741 | PTH   | 5745   | PTHR1     | L |
| 5741 | PTH   | 5746   | PTHR2     | L |
| 5741 | PTH   | 7917   | BAT3      | S |
| 5741 | PTH   | 9638   | FEZ1      | S |
| 5743 | PTGS2 | 7157   | TP53      | L |
| 5744 | PTHLH | 5745   | PTHR1     | L |
| 5745 | PTHR1 | 9351   | SLC9A3R2  | L |
| 5745 | PTHR1 | 9368   | SLC9A3R1  | L |
| 5747 | PTK2  | 5781   | PTPN11    | L |
| 5747 | PTK2  | 5782   | PTPN12    | L |
| 5747 | PTK2  | 5794   | PTPRH     | L |
| 5747 | PTK2  | 6401   | SELE      | L |
| 5747 | PTK2  | 6464   | SHC1      | L |
| 5747 | PTK2  | 6714   | SRC       | L |
| 5747 | PTK2  | 6772   | STAT1     | L |
| 5747 | PTK2  | 6850   | SYK       | L |
| 5747 | PTK2  | 7041   | TGFB111   | L |
| 5747 | PTK2  | 7094   | TLN1      | L |
| 5747 | PTK2  | 7205   | TRIP6     | L |
| 5747 | PTK2  | 7430   | VIL2      | L |
| 5747 | PTK2  | 8440   | NCK2      | L |
| 5747 | PTK2  | 8835   | SOCS2     | R |
| 5747 | PTK2  | 9140   | ATG12     | R |
| 5747 | PTK2  | 9564   | BCAR1     | L |
| 5747 | PTK2  | 9821   | RB1CC1    | L |
| 5747 | PTK2  | 10278  | EFS       | L |
| 5747 | PTK2  | 10519  | CIB1      | L |
| 5747 | PTK2  | 23092  | ARHGAP26  | L |
| 5747 | PTK2  | 28964  | GIT1      | L |
| 5747 | PTK2  | 50807  | DDEF1     | L |
| 5747 | PTK2  | 64780  | MICAL1    | L |
| 5753 | PTK6  | 10657  | KHDRBS1   | L |
| 5753 | PTK6  | 55620  | STAP2     | L |
| 5757 | PTMA  | 5901   | RAN       | L |
| 5757 | PTMA  | 6418   | SET       | L |
| 5757 | PTMA  | 7433   | VIPR1     | L |
| 5757 | PTMA  | 8290   | HIST3H3   | L |
| 5757 | PTMA  | 8349   | HIST2H2BE | L |
| 5757 | PTMA  | 8359   | HIST1H4A  | L |
| 5757 | PTMA  | 9611   | NCOR1     | L |
| 5757 | PTMA  | 11331  | PHB2      | L |
| 5757 | PTMA  | 23636  | NUP62     | L |
| 5757 | PTMA  | 25942  | SIN3A     | L |
| 5763 | PTMS  | 51608  | C7orf20   | S |
| 5764 | PTN   | 5787   | PTPRB     | L |
| 5764 | PTN   | 5802   | PTPRS     | S |
| 5764 | PTN   | 5803   | PTPRZ1    | L |
| 5764 | PTN   | 6016   | RIT1      | S |
| 5764 | PTN   | 6176   | RPLP1     | S |
| 5764 | PTN   | 6303   | SAT       | S |

|      |       |        |          |   |
|------|-------|--------|----------|---|
| 5764 | PTN   | 6382   | SDC1     | L |
| 5764 | PTN   | 6449   | SGTA     | S |
| 5764 | PTN   | 6745   | SSR1     | S |
| 5764 | PTN   | 6866   | TAC3     | S |
| 5764 | PTN   | 7159   | TP53BP2  | S |
| 5764 | PTN   | 8195   | MKKS     | S |
| 5764 | PTN   | 8614   | STC2     | S |
| 5764 | PTN   | 8665   | EIF3S5   | S |
| 5764 | PTN   | 9238   | TBRG4    | S |
| 5764 | PTN   | 9587   | MAD2L1BP | S |
| 5764 | PTN   | 9627   | SNCAIP   | S |
| 5764 | PTN   | 9672   | SDC3     | L |
| 5764 | PTN   | 9804   | TOMM20   | S |
| 5764 | PTN   | 9905   | RUTBC1   | S |
| 5764 | PTN   | 9913   | SUPT7L   | S |
| 5764 | PTN   | 10190  | TXNDC9   | S |
| 5764 | PTN   | 10249  | GLYAT    | S |
| 5764 | PTN   | 10399  | GNB2L1   | S |
| 5764 | PTN   | 10406  | WFDC2    | S |
| 5764 | PTN   | 10425  | ARIH2    | S |
| 5764 | PTN   | 10927  | SPIN     | S |
| 5764 | PTN   | 11243  | PMF1     | S |
| 5764 | PTN   | 11266  | DUSP12   | S |
| 5764 | PTN   | 23654  | PLXNB2   | S |
| 5764 | PTN   | 26292  | MYCBP    | S |
| 5764 | PTN   | 50618  | ITSN2    | S |
| 5764 | PTN   | 51019  | CGI-116  | S |
| 5764 | PTN   | 51236  | C8orf30A | S |
| 5764 | PTN   | 51631  | LUC7L2   | S |
| 5764 | PTN   | 51726  | DNAJB11  | S |
| 5764 | PTN   | 54544  | C1orf42  | S |
| 5764 | PTN   | 54622  | ARFRP2   | S |
| 5764 | PTN   | 54810  | GIPC2    | S |
| 5764 | PTN   | 55147  | RBM23    | S |
| 5764 | PTN   | 55186  | SLC25A36 | S |
| 5764 | PTN   | 55643  | BTBD2    | S |
| 5764 | PTN   | 55755  | CDK5RAP2 | S |
| 5764 | PTN   | 56647  | BCCIP    | S |
| 5764 | PTN   | 56893  | UBQLN4   | S |
| 5764 | PTN   | 57050  | SAS10    | S |
| 5764 | PTN   | 60489  | APOBEC3G | S |
| 5764 | PTN   | 78987  | CRELD1   | S |
| 5764 | PTN   | 79101  | MGC5306  | S |
| 5764 | PTN   | 79663  | HSPBAP1  | S |
| 5764 | PTN   | 79886  | C9orf82  | S |
| 5764 | PTN   | 84141  | FLJ13391 | S |
| 5764 | PTN   | 266812 | NAP1L5   | S |
| 5770 | PTPN1 | 7297   | TYK2     | L |
| 5770 | PTPN1 | 9564   | BCAR1    | L |
| 5770 | PTPN1 | 22800  | RRAS2    | L |
| 5771 | PTPN2 | 6774   | STAT3    | L |
| 5774 | PTPN3 | 7529   | YWHAB    | L |
| 5774 | PTPN3 | 25865  | PRKD2    | L |
| 5774 | PTPN3 | 57473  | GM632    | L |
| 5775 | PTPN4 | 10524  | HTATIP   | S |
| 5775 | PTPN4 | 23140  | ZZEF1    | S |
| 5777 | PTPN6 | 5788   | PTPRC    | L |
| 5777 | PTPN6 | 6098   | ROS1     | L |
| 5777 | PTPN6 | 6752   | SSTR2    | L |
| 5777 | PTPN6 | 6777   | STAT5B   | L |
| 5777 | PTPN6 | 6850   | SYK      | L |
| 5777 | PTPN6 | 7132   | TNFRSF1A | L |
| 5777 | PTPN6 | 7297   | TYK2     | L |
| 5777 | PTPN6 | 7409   | VAV1     | L |
| 5777 | PTPN6 | 7535   | ZAP70    | L |
| 5777 | PTPN6 | 7852   | CXCR4    | L |
| 5777 | PTPN6 | 8471   | IRS4     | L |

|      |        |        |          |   |
|------|--------|--------|----------|---|
| 5777 | PTPN6  | 9846   | GAB2     | L |
| 5777 | PTPN6  | 29760  | BLNK     | L |
| 5777 | PTPN6  | 29992  | PILRA    | L |
| 5777 | PTPN6  | 50856  | CLEC4A   | L |
| 5777 | PTPN6  | 55824  | PAG1     | L |
| 5777 | PTPN6  | 80021  | TMEM62   | S |
| 5777 | PTPN6  | 80739  | C6orf25  | L |
| 5777 | PTPN6  | 114132 | SIGLEC11 | L |
| 5777 | PTPN6  | 114836 | SLAMF6   | L |
| 5777 | PTPN6  | 140885 | PTPNS1   | L |
| 5777 | PTPN6  | 151888 | BTLA     | L |
| 5777 | PTPN6  | 340205 | TREML1   | L |
| 5780 | PTPN9  | 10313  | RTN3     | R |
| 5781 | PTPN11 | 5829   | PXN      | L |
| 5781 | PTPN11 | 6401   | SELE     | L |
| 5781 | PTPN11 | 6464   | SHC1     | L |
| 5781 | PTPN11 | 6504   | SLAMF1   | L |
| 5781 | PTPN11 | 6774   | STAT3    | L |
| 5781 | PTPN11 | 6776   | STAT5A   | L |
| 5781 | PTPN11 | 7010   | TEK      | L |
| 5781 | PTPN11 | 7075   | TIE1     | L |
| 5781 | PTPN11 | 7094   | TLN1     | L |
| 5781 | PTPN11 | 7132   | TNFRSF1A | L |
| 5781 | PTPN11 | 8471   | IRS4     | L |
| 5781 | PTPN11 | 8660   | IRS2     | L |
| 5781 | PTPN11 | 9019   | MPZL1    | L |
| 5781 | PTPN11 | 10817  | FRS3     | L |
| 5781 | PTPN11 | 10818  | FRS2     | L |
| 5781 | PTPN11 | 27036  | SIGLEC7  | L |
| 5781 | PTPN11 | 27240  | SIT1     | L |
| 5781 | PTPN11 | 29992  | PILRA    | L |
| 5781 | PTPN11 | 55824  | PAG1     | L |
| 5781 | PTPN11 | 80739  | C6orf25  | L |
| 5781 | PTPN11 | 114132 | SIGLEC11 | L |
| 5781 | PTPN11 | 114836 | SLAMF6   | L |
| 5781 | PTPN11 | 139716 | GAB3     | L |
| 5781 | PTPN11 | 151888 | BTLA     | L |
| 5781 | PTPN11 | 340205 | TREML1   | L |
| 5782 | PTPN12 | 5829   | PXN      | L |
| 5782 | PTPN12 | 6464   | SHC1     | L |
| 5782 | PTPN12 | 7041   | TGFB111  | L |
| 5782 | PTPN12 | 7402   | UTRN     | L |
| 5782 | PTPN12 | 7917   | BAT3     | L |
| 5782 | PTPN12 | 8675   | STX16    | L |
| 5782 | PTPN12 | 9051   | PSTPIP1  | L |
| 5782 | PTPN12 | 9564   | BCAR1    | L |
| 5782 | PTPN12 | 9904   | RBM19    | L |
| 5782 | PTPN12 | 10278  | EFS      | L |
| 5782 | PTPN12 | 54881  | TEX10    | L |
| 5782 | PTPN12 | 80108  | ZFP2     | L |
| 5782 | PTPN12 | 83591  | THAP2    | L |
| 5782 | PTPN12 | 90410  | IFT20    | L |
| 5783 | PTPN13 | 7205   | TRIP6    | L |
| 5783 | PTPN13 | 9411   | ARHGAP29 | L |
| 5783 | PTPN13 | 51735  | RAPGEF6  | L |
| 5784 | PTPN14 | 7082   | TJP1     | L |
| 5787 | PTPRB  | 8506   | CNTNAP1  | L |
| 5787 | PTPRB  | 260425 | MAGI3    | L |
| 5788 | PTPRC  | 5790   | PTPRCAP  | L |
| 5788 | PTPRC  | 5921   | RASA1    | L |
| 5788 | PTPRC  | 7409   | VAV1     | L |
| 5788 | PTPRC  | 7535   | ZAP70    | L |
| 5788 | PTPRC  | 8495   | PPFIBP2  | L |
| 5788 | PTPRC  | 8631   | SCAP1    | L |
| 5788 | PTPRC  | 10507  | SEMA4D   | L |
| 5788 | PTPRC  | 23193  | GANAB    | L |
| 5788 | PTPRC  | 26994  | RNF11    | L |

|      |        |        |          |    |
|------|--------|--------|----------|----|
| 5788 | PTPRC  | 27257  | LSM1     | L  |
| 5789 | PTPRD  | 5802   | PTPRS    | L  |
| 5789 | PTPRD  | 8499   | PPFIA2   | L  |
| 5789 | PTPRD  | 8500   | PPFIA1   | L  |
| 5789 | PTPRD  | 8541   | PPFIA3   | L  |
| 5791 | PTPRE  | 7094   | TLN1     | L  |
| 5792 | PTPRF  | 5979   | RET      | L  |
| 5792 | PTPRF  | 6498   | SKIL     | L  |
| 5792 | PTPRF  | 7204   | TRIO     | L  |
| 5792 | PTPRF  | 8499   | PPFIA2   | L  |
| 5792 | PTPRF  | 8500   | PPFIA1   | L  |
| 5792 | PTPRF  | 8541   | PPFIA3   | L  |
| 5792 | PTPRF  | 9564   | BCAR1    | L  |
| 5792 | PTPRF  | 10818  | FRS2     | L  |
| 5792 | PTPRF  | 55660  | FNBP3    | L  |
| 5792 | PTPRF  | 57473  | GM632    | L  |
| 5794 | PTPRH  | 5829   | PXN      | L  |
| 5794 | PTPRH  | 9564   | BCAR1    | L  |
| 5795 | PTPRJ  | 6386   | SDCBP    | L  |
| 5795 | PTPRJ  | 8878   | SQSTM1   | L  |
| 5795 | PTPRJ  | 27040  | LAT      | L  |
| 5796 | PTPRK  | 7083   | TK1      | S  |
| 5796 | PTPRK  | 51064  | (null)   | S  |
| 5797 | PTPRM  | 10399  | GNB2L1   | L  |
| 5798 | PTPRN  | 6645   | SNTB2    | L  |
| 5798 | PTPRN  | 57731  | SPTBN4   | L  |
| 5799 | PTPRN2 | 9793   | CKAP5    | L  |
| 5799 | PTPRN2 | 57731  | SPTBN4   | L  |
| 5802 | PTPRS  | 7280   | TUBB2    | S  |
| 5802 | PTPRS  | 8499   | PPFIA2   | L  |
| 5802 | PTPRS  | 8500   | PPFIA1   | L  |
| 5802 | PTPRS  | 8541   | PPFIA3   | L  |
| 5802 | PTPRS  | 9094   | UNC119   | S  |
| 5802 | PTPRS  | 9638   | FEZ1     | S  |
| 5802 | PTPRS  | 9869   | SETDB1   | S  |
| 5802 | PTPRS  | 10524  | HTATIP   | S  |
| 5802 | PTPRS  | 10813  | UTP14A   | S  |
| 5802 | PTPRS  | 11021  | RAB35    | S  |
| 5802 | PTPRS  | 25843  | PREI3    | S  |
| 5802 | PTPRS  | 57562  | KIAA1377 | S  |
| 5802 | PTPRS  | 197131 | UBR1     | S  |
| 5802 | PTPRS  | 222019 | (null)   | S  |
| 5802 | PTPRS  | 284169 | (null)   | S  |
| 5810 | RAD1   | 5883   | RAD9A    | L  |
| 5810 | RAD1   | 5884   | RAD17    | L  |
| 5810 | RAD1   | 7266   | DNAJC7   | L  |
| 5810 | RAD1   | 81631  | MAP1LC3B | S  |
| 5813 | PURA   | 6667   | SP1      | L  |
| 5813 | PURA   | 11033  | CENTA1   | L  |
| 5817 | PVR    | 6990   | TCTE1L   | L  |
| 5817 | PVR    | 7448   | VTN      | L  |
| 5817 | PVR    | 10053  | AP1M2    | L  |
| 5817 | PVR    | 25945  | PVRL3    | L  |
| 5818 | PVRL1  | 56288  | PARD3    | L  |
| 5819 | PVRL2  | 9551   | ATP5J2   | S  |
| 5822 | PWP2H  | 10040  | TOM1L1   | S  |
| 5824 | PEX19  | 5825   | ABCD3    | L  |
| 5824 | PEX19  | 8504   | PEX3     | RL |
| 5824 | PEX19  | 8799   | PEX11B   | L  |
| 5824 | PEX19  | 8800   | PEX11A   | L  |
| 5824 | PEX19  | 9409   | PEX16    | L  |
| 5824 | PEX19  | 10478  | SLC25A17 | L  |
| 5826 | ABCD4  | 8682   | PEA15    | S  |
| 5826 | ABCD4  | 10301  | DLEU1    | S  |
| 5826 | ABCD4  | 51669  | TMEM66   | S  |
| 5828 | PXMP3  | 5830   | PEX5     | L  |
| 5828 | PXMP3  | 7088   | TLE1     | S  |

|      |       |       |           |   |
|------|-------|-------|-----------|---|
| 5828 | PXMP3 | 11161 | C14orf1   | S |
| 5829 | PXN   | 5921  | RASA1     | L |
| 5829 | PXN   | 6122  | RPL3      | L |
| 5829 | PXN   | 6124  | RPL4      | L |
| 5829 | PXN   | 6125  | RPL5      | L |
| 5829 | PXN   | 6128  | RPL6      | L |
| 5829 | PXN   | 6129  | RPL7      | L |
| 5829 | PXN   | 6132  | RPL8      | L |
| 5829 | PXN   | 6133  | RPL9      | L |
| 5829 | PXN   | 6134  | RPL10     | L |
| 5829 | PXN   | 6135  | RPL11     | L |
| 5829 | PXN   | 6137  | RPL13     | L |
| 5829 | PXN   | 6138  | RPL15     | L |
| 5829 | PXN   | 6139  | RPL17     | L |
| 5829 | PXN   | 6143  | RPL19     | L |
| 5829 | PXN   | 6144  | RPL21     | L |
| 5829 | PXN   | 6146  | RPL22     | L |
| 5829 | PXN   | 6154  | RPL26     | L |
| 5829 | PXN   | 6155  | RPL27     | L |
| 5829 | PXN   | 6158  | RPL28     | L |
| 5829 | PXN   | 6159  | RPL29     | L |
| 5829 | PXN   | 6169  | RPL38     | L |
| 5829 | PXN   | 6175  | RPLP0     | L |
| 5829 | PXN   | 6181  | RPLP2     | L |
| 5829 | PXN   | 6194  | RPS6      | L |
| 5829 | PXN   | 6201  | RPS7      | L |
| 5829 | PXN   | 6228  | RPS23     | L |
| 5829 | PXN   | 6229  | RPS24     | L |
| 5829 | PXN   | 6232  | RPS27     | L |
| 5829 | PXN   | 6238  | RRBP1     | L |
| 5829 | PXN   | 6401  | SELE      | L |
| 5829 | PXN   | 6421  | SFPQ      | L |
| 5829 | PXN   | 6428  | SFRS3     | L |
| 5829 | PXN   | 6520  | SLC3A2    | L |
| 5829 | PXN   | 6714  | SRC       | L |
| 5829 | PXN   | 6742  | SSBP1     | L |
| 5829 | PXN   | 6850  | SYK       | L |
| 5829 | PXN   | 7024  | TFCP2     | L |
| 5829 | PXN   | 7041  | TGFB111   | L |
| 5829 | PXN   | 7052  | TGM2      | L |
| 5829 | PXN   | 7094  | TLN1      | L |
| 5829 | PXN   | 7108  | TM7SF2    | L |
| 5829 | PXN   | 7112  | TMPO      | L |
| 5829 | PXN   | 7205  | TRIP6     | L |
| 5829 | PXN   | 7278  | TUBA2     | L |
| 5829 | PXN   | 7283  | TUBG1     | L |
| 5829 | PXN   | 7414  | VCL       | L |
| 5829 | PXN   | 7431  | VIM       | L |
| 5829 | PXN   | 7520  | XRCC5     | L |
| 5829 | PXN   | 7534  | YWHAZ     | L |
| 5829 | PXN   | 7846  | TUBA3     | L |
| 5829 | PXN   | 8091  | HMGA2     | L |
| 5829 | PXN   | 8815  | BANF1     | L |
| 5829 | PXN   | 8853  | DDEF2     | L |
| 5829 | PXN   | 9045  | RPL14     | L |
| 5829 | PXN   | 9185  | REPS2     | L |
| 5829 | PXN   | 9349  | RPL23     | L |
| 5829 | PXN   | 9815  | GIT2      | L |
| 5829 | PXN   | 9961  | MVP       | L |
| 5829 | PXN   | 10146 | G3BP      | L |
| 5829 | PXN   | 10157 | AASS      | L |
| 5829 | PXN   | 10163 | WASF2     | L |
| 5829 | PXN   | 10376 | K-ALPHA-1 | L |
| 5829 | PXN   | 10383 | TUBB2     | L |
| 5829 | PXN   | 10466 | COG5      | L |
| 5829 | PXN   | 10620 | ARID3B    | L |
| 5829 | PXN   | 10970 | CKAP4     | L |



|      |         |        |           |    |
|------|---------|--------|-----------|----|
| 5829 | PXN     | 26986  | PABPC1    | L  |
| 5829 | PXN     | 27175  | TUBG2     | L  |
| 5829 | PXN     | 28964  | GIT1      | L  |
| 5829 | PXN     | 51164  | DCTN4     | L  |
| 5829 | PXN     | 51807  | TUBA8     | L  |
| 5829 | PXN     | 55338  | FLJ11292  | L  |
| 5829 | PXN     | 55567  | DNAH3     | L  |
| 5829 | PXN     | 64780  | MICAL1    | L  |
| 5829 | PXN     | 91662  | NALP12    | L  |
| 5829 | PXN     | 114787 | KIAA1893  | L  |
| 5829 | PXN     | 116840 | LIP8      | L  |
| 5829 | PXN     | 118813 | ZFYVE27   | L  |
| 5829 | PXN     | 146053 | LOC146053 | L  |
| 5829 | PXN     | 151887 | URB       | L  |
| 5829 | PXN     | 203068 | TUBB      | L  |
| 5830 | PEX5    | 8528   | DDO       | L  |
| 5830 | PEX5    | 10073  | RNUT1     | S  |
| 5830 | PEX5    | 23410  | SIRT3     | R  |
| 5833 | PCYT2   | 79831  | FLJ13798  | R  |
| 5837 | PYGM    | 6271   | S100A1    | L  |
| 5858 | PZP     | 7040   | TGFB1     | L  |
| 5858 | PZP     | 7042   | TGFB2     | L  |
| 5859 | QARS    | 7186   | TRAF2     | R  |
| 5859 | QARS    | 7916   | BAT2      | L  |
| 5859 | QARS    | 8446   | DUSP11    | S  |
| 5859 | QARS    | 8895   | CPNE3     | S  |
| 5859 | QARS    | 26994  | RNF11     | L  |
| 5861 | RAB1A   | 6624   | FSCN1     | S  |
| 5861 | RAB1A   | 6861   | SYT5      | S  |
| 5861 | RAB1A   | 8615   | VDP       | L  |
| 5861 | RAB1A   | 9950   | GOLGA5    | L  |
| 5861 | RAB1A   | 10567  | RABAC1    | RL |
| 5861 | RAB1A   | 22924  | MAPRE3    | S  |
| 5861 | RAB1A   | 23539  | SLC16A8   | S  |
| 5861 | RAB1A   | 26003  | GORASP2   | L  |
| 5861 | RAB1A   | 51042  | ZNF593    | S  |
| 5861 | RAB1A   | 55312  | RFK       | S  |
| 5861 | RAB1A   | 79735  | TBC1D17   | S  |
| 5861 | RAB1A   | 85377  | MICAL-L1  | L  |
| 5862 | RAB2    | 26003  | GORASP2   | L  |
| 5862 | RAB2    | 196472 | MGC39520  | R  |
| 5863 | RGL2    | 5908   | RAP1B     | L  |
| 5863 | RGL2    | 9094   | UNC119    | S  |
| 5863 | RGL2    | 10524  | HTATIP    | S  |
| 5863 | RGL2    | 11143  | MYST2     | S  |
| 5863 | RGL2    | 60492  | MDS025    | S  |
| 5864 | RAB3A   | 5866   | RAB3IL1   | L  |
| 5864 | RAB3A   | 5876   | RABGGTB   | L  |
| 5864 | RAB3A   | 5877   | RABIF     | L  |
| 5864 | RAB3A   | 8573   | CASK      | L  |
| 5864 | RAB3A   | 9501   | RPH3AL    | L  |
| 5864 | RAB3A   | 9699   | RIMS2     | L  |
| 5864 | RAB3A   | 10567  | RABAC1    | L  |
| 5864 | RAB3A   | 22999  | RIMS1     | L  |
| 5864 | RAB3A   | 23312  | DMXL2     | L  |
| 5864 | RAB3A   | 94121  | SYTL4     | L  |
| 5864 | RAB3A   | 94122  | SYTL5     | L  |
| 5864 | RAB3A   | 117177 | RAB3IP    | L  |
| 5865 | RAB3B   | 9501   | RPH3AL    | L  |
| 5865 | RAB3B   | 9699   | RIMS2     | L  |
| 5866 | RAB3IL1 | 8766   | RAB11A    | R  |
| 5866 | RAB3IL1 | 79873  | NUDT18    | R  |
| 5866 | RAB3IL1 | 117177 | RAB3IP    | R  |
| 5867 | RAB4A   | 6648   | SOD2      | S  |
| 5867 | RAB4A   | 6810   | STX4A     | L  |
| 5867 | RAB4A   | 7157   | TP53      | S  |
| 5867 | RAB4A   | 8655   | DNCL1     | L  |

|      |         |        |               |   |
|------|---------|--------|---------------|---|
| 5867 | RAB4A   | 9135   | RABEP1        | L |
| 5867 | RAB4A   | 9371   | KIF3B         | L |
| 5867 | RAB4A   | 10307  | APBB3         | S |
| 5867 | RAB4A   | 10567  | RABAC1        | L |
| 5867 | RAB4A   | 23607  | CD2AP         | L |
| 5867 | RAB4A   | 27342  | RABGEF1       | L |
| 5867 | RAB4A   | 51143  | DNCLI1        | L |
| 5867 | RAB4A   | 80223  | RAB11FIP1     | L |
| 5868 | RAB5A   | 6810   | STX4A         | L |
| 5868 | RAB5A   | 7249   | TSC2          | L |
| 5868 | RAB5A   | 8411   | EEA1          | L |
| 5868 | RAB5A   | 9135   | RABEP1        | L |
| 5868 | RAB5A   | 9610   | RIN1          | L |
| 5868 | RAB5A   | 9712   | USP6NL        | L |
| 5868 | RAB5A   | 10567  | RABAC1        | L |
| 5868 | RAB5A   | 84218  | TBC1D3        | L |
| 5868 | RAB5A   | 259173 | ALS2CL        | L |
| 5868 | RAB5A   | 326624 | RAB37         | L |
| 5869 | RAB5B   | 7037   | TFRC          | L |
| 5869 | RAB5B   | 8411   | EEA1          | L |
| 5869 | RAB5B   | 9610   | RIN1          | L |
| 5869 | RAB5B   | 79890  | RIN3          | L |
| 5870 | RAB6A   | 10112  | KIF20A        | L |
| 5870 | RAB6A   | 10567  | RABAC1        | L |
| 5870 | RAB6A   | 23299  | BICD2         | L |
| 5870 | RAB6A   | 94122  | SYTL5         | L |
| 5871 | MAP4K2  | 7186   | TRAF2         | L |
| 5873 | RAB27A  | 6804   | STX1A         | L |
| 5873 | RAB27A  | 7704   | ZBTB16        | S |
| 5873 | RAB27A  | 9501   | RPH3AL        | L |
| 5873 | RAB27A  | 10980  | COPS6         | S |
| 5873 | RAB27A  | 11161  | C14orf1       | S |
| 5873 | RAB27A  | 54843  | SYTL2         | L |
| 5873 | RAB27A  | 55791  | C1orf103      | S |
| 5873 | RAB27A  | 57562  | KIAA1377      | S |
| 5873 | RAB27A  | 79083  | MLPH          | L |
| 5873 | RAB27A  | 84060  | DKFZP564O0523 | S |
| 5873 | RAB27A  | 94121  | SYTL4         | L |
| 5873 | RAB27A  | 94122  | SYTL5         | L |
| 5873 | RAB27A  | 201294 | UNC13D        | L |
| 5874 | RAB27B  | 9501   | RPH3AL        | L |
| 5874 | RAB27B  | 79083  | MLPH          | L |
| 5874 | RAB27B  | 94121  | SYTL4         | L |
| 5874 | RAB27B  | 201294 | UNC13D        | L |
| 5876 | RABGGTB | 8073   | PTP4A2        | L |
| 5877 | RABIF   | 10542  | HBXIP         | S |
| 5877 | RABIF   | 10813  | UTP14A        | S |
| 5877 | RABIF   | 56267  | KAT3          | S |
| 5877 | RABIF   | 376267 | RAB15         | L |
| 5878 | RAB5C   | 8411   | EEA1          | L |
| 5878 | RAB5C   | 10567  | RABAC1        | L |
| 5878 | RAB5C   | 79890  | RIN3          | L |
| 5879 | RAC1    | 5910   | RAP1GDS1      | L |
| 5879 | RAC1    | 6774   | STAT3         | L |
| 5879 | RAC1    | 7074   | TIAM1         | L |
| 5879 | RAC1    | 7204   | TRIO          | L |
| 5879 | RAC1    | 7277   | TUBA1         | L |
| 5879 | RAC1    | 7454   | WAS           | L |
| 5879 | RAC1    | 8826   | IQGAP1        | L |
| 5879 | RAC1    | 8871   | SYNJ2         | L |
| 5879 | RAC1    | 9181   | ARHGEF2       | L |
| 5879 | RAC1    | 10451  | VAV3          | L |
| 5879 | RAC1    | 10458  | BAIAP2        | L |
| 5879 | RAC1    | 10788  | IQGAP2        | L |
| 5879 | RAC1    | 10928  | RALBP1        | L |
| 5879 | RAC1    | 23191  | CYFIP1        | L |
| 5879 | RAC1    | 23463  | ICMT          | L |

|      |         |        |          |   |
|------|---------|--------|----------|---|
| 5879 | RAC1    | 23616  | SH3BP1   | L |
| 5879 | RAC1    | 23647  | ARFIP2   | L |
| 5879 | RAC1    | 29109  | FHOD1    | L |
| 5879 | RAC1    | 50619  | DEF6     | L |
| 5879 | RAC1    | 50855  | PARD6A   | L |
| 5879 | RAC1    | 51495  | HSPC121  | L |
| 5879 | RAC1    | 55843  | ARHGAP15 | L |
| 5879 | RAC1    | 57144  | PAK7     | L |
| 5879 | RAC1    | 81704  | DOCK8    | L |
| 5879 | RAC1    | 84218  | TBC1D3   | L |
| 5879 | RAC1    | 84552  | PARD6G   | L |
| 5880 | RAC2    | 8454   | CUL1     | L |
| 5880 | RAC2    | 23463  | ICMT     | L |
| 5880 | RAC2    | 23647  | ARFIP2   | L |
| 5880 | RAC2    | 50619  | DEF6     | L |
| 5881 | RAC3    | 6927   | TCF1     | L |
| 5881 | RAC3    | 10519  | CIB1     | L |
| 5881 | RAC3    | 29959  | NRBP     | L |
| 5883 | RAD9A   | 5884   | RAD17    | L |
| 5883 | RAD9A   | 7266   | DNAJC7   | L |
| 5883 | RAD9A   | 11073  | TOPBP1   | L |
| 5883 | RAD9A   | 11200  | CHEK2    | L |
| 5883 | RAD9A   | 50618  | ITSN2    | L |
| 5883 | RAD9A   | 63967  | CLSPN    | L |
| 5884 | RAD17   | 5982   | RFC2     | L |
| 5884 | RAD17   | 5983   | RFC3     | L |
| 5884 | RAD17   | 5984   | RFC4     | L |
| 5884 | RAD17   | 5985   | RFC5     | L |
| 5885 | RAD21   | 8467   | SMARCA5  | L |
| 5885 | RAD21   | 10274  | STAG1    | L |
| 5885 | RAD21   | 10735  | STAG2    | L |
| 5886 | RAD23A  | 6184   | RPN1     | L |
| 5886 | RAD23A  | 7186   | TRAF2    | R |
| 5886 | RAD23A  | 7508   | XPC      | L |
| 5886 | RAD23A  | 8878   | SQSTM1   | R |
| 5886 | RAD23A  | 84993  | UBL7     | R |
| 5887 | RAD23B  | 6996   | TDG      | L |
| 5887 | RAD23B  | 7508   | XPC      | L |
| 5888 | RAD51   | 6117   | RPA1     | L |
| 5888 | RAD51   | 7157   | TP53     | L |
| 5888 | RAD51   | 7329   | UBE2I    | L |
| 5888 | RAD51   | 7341   | SUMO1    | L |
| 5888 | RAD51   | 7431   | VIM      | S |
| 5888 | RAD51   | 8438   | RAD54L   | L |
| 5888 | RAD51   | 9093   | DNAJA3   | L |
| 5888 | RAD51   | 10635  | RAD51AP1 | L |
| 5888 | RAD51   | 11144  | DMC1     | L |
| 5888 | RAD51   | 25788  | RAD54B   | L |
| 5888 | RAD51   | 283987 | C17orf28 | L |
| 5889 | RAD51C  | 7517   | XRCC3    | L |
| 5892 | RAD51L3 | 7516   | XRCC2    | L |
| 5892 | RAD51L3 | 7517   | XRCC3    | L |
| 5893 | RAD52   | 7486   | WRN      | L |
| 5894 | RAF1    | 5906   | RAP1A    | L |
| 5894 | RAF1    | 5911   | RAP2A    | L |
| 5894 | RAF1    | 5925   | RB1      | L |
| 5894 | RAF1    | 5934   | RBL2     | L |
| 5894 | RAF1    | 6009   | RHEB     | L |
| 5894 | RAF1    | 6714   | SRC      | L |
| 5894 | RAF1    | 7203   | CCT3     | L |
| 5894 | RAF1    | 7409   | VAV1     | L |
| 5894 | RAF1    | 7529   | YWHAB    | L |
| 5894 | RAF1    | 7531   | YWHAE    | L |
| 5894 | RAF1    | 7532   | YWHAG    | L |
| 5894 | RAF1    | 7533   | YWHAH    | L |
| 5894 | RAF1    | 7534   | YWHAZ    | L |
| 5894 | RAF1    | 8036   | SHOC2    | L |

|      |         |        |          |    |
|------|---------|--------|----------|----|
| 5894 | RAF1    | 8837   | CFLAR    | L  |
| 5894 | RAF1    | 22800  | RRAS2    | L  |
| 5894 | RAF1    | 22808  | MRAS     | L  |
| 5894 | RAF1    | 51555  | PEX5L    | L  |
| 5894 | RAF1    | 51765  | MASK     | L  |
| 5894 | RAF1    | 81848  | SPRY4    | L  |
| 5896 | RAG1    | 5897   | RAG2     | L  |
| 5898 | RALA    | 9649   | RALGPS1  | L  |
| 5898 | RALA    | 10640  | SEC10L1  | L  |
| 5898 | RALA    | 10928  | RALBP1   | L  |
| 5898 | RALA    | 11336  | SEC6L1   | L  |
| 5898 | RALA    | 22866  | CNKSR2   | L  |
| 5898 | RALA    | 51762  | RAB8B    | L  |
| 5898 | RALA    | 55763  | SEC3L1   | L  |
| 5898 | RALA    | 55770  | SEC5L1   | L  |
| 5898 | RALA    | 85021  | REPS1    | L  |
| 5898 | RALA    | 149371 | EXOC8    | L  |
| 5898 | RALA    | 266747 | Rgr      | L  |
| 5899 | RALB    | 9185   | REPS2    | L  |
| 5899 | RALB    | 10928  | RALBP1   | RL |
| 5899 | RALB    | 85021  | REPS1    | L  |
| 5899 | RALB    | 266747 | Rgr      | L  |
| 5900 | RALGDS  | 5906   | RAP1A    | L  |
| 5900 | RALGDS  | 5911   | RAP2A    | L  |
| 5900 | RALGDS  | 5912   | RAP2B    | L  |
| 5900 | RALGDS  | 6016   | RIT1     | L  |
| 5900 | RALGDS  | 6237   | RRAS     | L  |
| 5900 | RALGDS  | 22800  | RRAS2    | L  |
| 5900 | RALGDS  | 22808  | MRAS     | L  |
| 5901 | RAN     | 5902   | RANBP1   | L  |
| 5901 | RAN     | 5903   | RANBP2   | L  |
| 5901 | RAN     | 5905   | RANGAP1  | L  |
| 5901 | RAN     | 6749   | SSRP1    | L  |
| 5901 | RAN     | 7514   | XPO1     | L  |
| 5901 | RAN     | 8498   | RANBP3   | L  |
| 5901 | RAN     | 8853   | DDEF2    | L  |
| 5901 | RAN     | 10048  | RANBP9   | L  |
| 5901 | RAN     | 10204  | NUTF2    | L  |
| 5901 | RAN     | 10527  | IPO7     | L  |
| 5901 | RAN     | 10762  | NUP50    | L  |
| 5901 | RAN     | 11260  | XPOT     | L  |
| 5901 | RAN     | 26012  | NELF     | S  |
| 5901 | RAN     | 29098  | RANGNRF  | L  |
| 5901 | RAN     | 51194  | IPO11    | L  |
| 5901 | RAN     | 57510  | XPO5     | L  |
| 5901 | RAN     | 57562  | KIAA1377 | S  |
| 5901 | RAN     | 84220  | RANBP2L1 | L  |
| 5901 | RAN     | 91754  | NEK9     | L  |
| 5902 | RANBP1  | 29098  | RANGNRF  | L  |
| 5903 | RANBP2  | 5905   | RANGAP1  | L  |
| 5903 | RANBP2  | 5956   | OPN1LW   | L  |
| 5903 | RANBP2  | 7329   | UBE2I    | L  |
| 5903 | RANBP2  | 7514   | XPO1     | L  |
| 5903 | RANBP2  | 11260  | XPOT     | L  |
| 5903 | RANBP2  | 23636  | NUP62    | L  |
| 5905 | RANGAP1 | 6613   | SUMO2    | L  |
| 5905 | RANGAP1 | 7329   | UBE2I    | L  |
| 5905 | RANGAP1 | 7341   | SUMO1    | L  |
| 5905 | RANGAP1 | 10526  | IPO8     | L  |
| 5906 | RAP1A   | 5910   | RAP1GDS1 | L  |
| 5906 | RAP1A   | 10567  | RABAC1   | L  |
| 5906 | RAP1A   | 10636  | RGS14    | L  |
| 5906 | RAP1A   | 22821  | RASA3    | L  |
| 5906 | RAP1A   | 51735  | RAPGEF6  | L  |
| 5906 | RAP1A   | 115727 | RASGRP4  | L  |
| 5906 | RAP1A   | 266747 | Rgr      | L  |
| 5908 | RAP1B   | 5909   | RAP1GA1  | L  |

|      |          |       |         |   |
|------|----------|-------|---------|---|
| 5908 | RAP1B    | 83593 | RASSF5  | L |
| 5909 | RAP1GA1  | 84206 | RKHD3   | S |
| 5910 | RAP1GDS1 | 22920 | KIFAP3  | L |
| 5910 | RAP1GDS1 | 26036 | ZNF451  | R |
| 5910 | RAP1GDS1 | 51562 | MBIP    | R |
| 5911 | RAP2A    | 9448  | MAP4K4  | L |
| 5911 | RAP2A    | 10636 | RGS14   | L |
| 5911 | RAP2A    | 51735 | RAPGEF6 | L |
| 5911 | RAP2A    | 83593 | RASSF5  | L |
| 5912 | RAP2B    | 10900 | RPIP8   | R |
| 5913 | RAPSN    | 10657 | KHDRBS1 | L |
| 5914 | RARA     | 5927  | JARID1A | L |
| 5914 | RARA     | 5948  | RBP2    | L |
| 5914 | RARA     | 6256  | RXRA    | L |
| 5914 | RARA     | 6257  | RXRB    | R |
| 5914 | RARA     | 6258  | RXRG    | R |
| 5914 | RARA     | 6667  | SP1     | L |
| 5914 | RARA     | 6777  | STAT5B  | L |
| 5914 | RARA     | 7080  | TITF1   | L |
| 5914 | RARA     | 7704  | ZBTB16  | L |
| 5914 | RARA     | 8125  | ANP32A  | L |
| 5914 | RARA     | 8202  | NCOA3   | L |
| 5914 | RARA     | 8204  | NRIP1   | L |
| 5914 | RARA     | 8431  | NR0B2   | L |
| 5914 | RARA     | 8648  | NCOA1   | L |
| 5914 | RARA     | 8805  | TRIM24  | L |
| 5914 | RARA     | 9318  | COPS2   | L |
| 5914 | RARA     | 9325  | TRIP4   | L |
| 5914 | RARA     | 9612  | NCOR2   | L |
| 5914 | RARA     | 10002 | NR2E3   | L |
| 5914 | RARA     | 10062 | NR1H3   | L |
| 5914 | RARA     | 10474 | TADA3L  | L |
| 5914 | RARA     | 10499 | NCOA2   | L |
| 5914 | RARA     | 23013 | SPEN    | L |
| 5914 | RARA     | 23054 | NCOA6   | L |
| 5914 | RARA     | 29982 | NRBF2   | L |
| 5914 | RARA     | 50805 | IRX4    | L |
| 5914 | RARA     | 55629 | PNRC2   | L |
| 5914 | RARA     | 64324 | NSD1    | L |
| 5915 | RARB     | 6257  | RXRB    | L |
| 5915 | RARB     | 8648  | NCOA1   | L |
| 5915 | RARB     | 25865 | PRKD2   | L |
| 5916 | RARG     | 6256  | RXRA    | L |
| 5921 | RASA1    | 6549  | SLC9A2  | L |
| 5921 | RASA1    | 6714  | SRC     | L |
| 5921 | RASA1    | 6790  | STK6    | L |
| 5921 | RASA1    | 6853  | SYN1    | L |
| 5921 | RASA1    | 7525  | YES1    | L |
| 5921 | RASA1    | 7535  | ZAP70   | L |
| 5921 | RASA1    | 9021  | SOCS3   | L |
| 5921 | RASA1    | 9046  | DOK2    | L |
| 5921 | RASA1    | 9093  | DNAJA3  | L |
| 5921 | RASA1    | 9212  | AURKB   | L |
| 5921 | RASA1    | 9448  | MAP4K4  | L |
| 5921 | RASA1    | 10146 | G3BP    | L |
| 5921 | RASA1    | 10399 | GNB2L1  | L |
| 5921 | RASA1    | 55824 | PAG1    | L |
| 5923 | RASGRF1  | 7531  | YWHAE   | L |
| 5923 | RASGRF1  | 9101  | USP8    | L |
| 5923 | RASGRF1  | 10188 | TNK2    | L |
| 5925 | RB1      | 5926  | ARID4A  | L |
| 5925 | RB1      | 5927  | JARID1A | L |
| 5925 | RB1      | 5928  | RBBP4   | L |
| 5925 | RB1      | 5929  | RBBP5   | L |
| 5925 | RB1      | 5931  | RBBP7   | L |
| 5925 | RB1      | 5932  | RBBP8   | L |
| 5925 | RB1      | 6015  | RING1   | L |

|      |         |        |          |    |
|------|---------|--------|----------|----|
| 5925 | RB1     | 6597   | SMARCA4  | L  |
| 5925 | RB1     | 6598   | SMARCB1  | L  |
| 5925 | RB1     | 6617   | SNAPC1   | L  |
| 5925 | RB1     | 6619   | SNAPC3   | L  |
| 5925 | RB1     | 6667   | SP1      | L  |
| 5925 | RB1     | 6670   | SP3      | L  |
| 5925 | RB1     | 6689   | SPIB     | L  |
| 5925 | RB1     | 6839   | SUV39H1  | L  |
| 5925 | RB1     | 6872   | TAF1     | L  |
| 5925 | RB1     | 6908   | TBP      | L  |
| 5925 | RB1     | 7052   | TGM2     | L  |
| 5925 | RB1     | 7112   | TMPO     | L  |
| 5925 | RB1     | 7343   | UBTF     | L  |
| 5925 | RB1     | 7799   | PRDM2    | L  |
| 5925 | RB1     | 8503   | PIK3R3   | L  |
| 5925 | RB1     | 8507   | ENC1     | L  |
| 5925 | RB1     | 8535   | CBX4     | L  |
| 5925 | RB1     | 8575   | PRKRA    | L  |
| 5925 | RB1     | 8804   | CREG1    | L  |
| 5925 | RB1     | 8841   | HDAC3    | L  |
| 5925 | RB1     | 8850   | PCAF     | L  |
| 5925 | RB1     | 8900   | CCNA1    | L  |
| 5925 | RB1     | 9321   | TRIP11   | L  |
| 5925 | RB1     | 9643   | MORF4L2  | L  |
| 5925 | RB1     | 9984   | THOC1    | L  |
| 5925 | RB1     | 10131  | TRAP1    | L  |
| 5925 | RB1     | 10399  | GNB2L1   | L  |
| 5925 | RB1     | 10403  | KNTC2    | L  |
| 5925 | RB1     | 10620  | ARID3B   | L  |
| 5925 | RB1     | 10741  | RBBP9    | L  |
| 5925 | RB1     | 10933  | MORF4L1  | L  |
| 5925 | RB1     | 23741  | CRI1     | L  |
| 5925 | RB1     | 26574  | AATF     | L  |
| 5925 | RB1     | 27043  | PELP1    | L  |
| 5925 | RB1     | 55814  | BDP1     | L  |
| 5926 | ARID4A  | 8841   | HDAC3    | L  |
| 5926 | ARID4A  | 23741  | CRI1     | L  |
| 5927 | JARID1A | 5933   | RBL1     | L  |
| 5927 | JARID1A | 6908   | TBP      | L  |
| 5927 | JARID1A | 7421   | VDR      | L  |
| 5928 | RBBP4   | 6184   | RPN1     | S  |
| 5928 | RBBP4   | 6667   | SP1      | L  |
| 5928 | RBBP4   | 6670   | SP3      | L  |
| 5928 | RBBP4   | 6839   | SUV39H1  | L  |
| 5928 | RBBP4   | 8841   | HDAC3    | L  |
| 5928 | RBBP4   | 9112   | MTA1     | L  |
| 5928 | RBBP4   | 23013  | SPEN     | L  |
| 5930 | RBBP6   | 6628   | SNRPB    | L  |
| 5930 | RBBP6   | 9372   | ZFYVE9   | L  |
| 5931 | RBBP7   | 6839   | SUV39H1  | L  |
| 5931 | RBBP7   | 9112   | MTA1     | L  |
| 5932 | RBBP8   | 5933   | RBL1     | RL |
| 5932 | RBBP8   | 5934   | RBL2     | L  |
| 5932 | RBBP8   | 8543   | LMO4     | L  |
| 5932 | RBBP8   | 9513   | FXR2     | R  |
| 5932 | RBBP8   | 10320  | ZNFN1A1  | L  |
| 5932 | RBBP8   | 22806  | ZNFN1A3  | L  |
| 5932 | RBBP8   | 26574  | AATF     | L  |
| 5932 | RBBP8   | 55093  | C8orf32  | R  |
| 5932 | RBBP8   | 60436  | TGIF2    | L  |
| 5932 | RBBP8   | 283987 | C17orf28 | R  |
| 5933 | RBL1    | 6872   | TAF1     | L  |
| 5933 | RBL1    | 7375   | USP4     | L  |
| 5933 | RBL1    | 8804   | CREG1    | L  |
| 5933 | RBL1    | 10741  | RBBP9    | L  |
| 5933 | RBL1    | 22938  | SNW1     | L  |
| 5933 | RBL1    | 57596  | KIAA1446 | R  |

|      |        |        |          |   |
|------|--------|--------|----------|---|
| 5934 | RBL2   | 6872   | TAF1     | L |
| 5934 | RBL2   | 7343   | UBTF     | L |
| 5934 | RBL2   | 8804   | CREG1    | L |
| 5934 | RBL2   | 10741  | RBBP9    | L |
| 5934 | RBL2   | 22938  | SNW1     | L |
| 5934 | RBL2   | 23309  | SIN3B    | L |
| 5934 | RBL2   | 55290  | BRF2     | L |
| 5935 | RBM3   | 7094   | TLN1     | L |
| 5935 | RBM3   | 7414   | VCL      | L |
| 5936 | RBM4   | 8900   | CCNA1    | L |
| 5936 | RBM4   | 55805  | LRP2BP   | L |
| 5939 | RBMS2  | 138311 | FAM69B   | S |
| 5940 | RBM1A1 | 6434   | SFRS10   | L |
| 5940 | RBM1A1 | 10656  | KHDRBS3  | L |
| 5947 | RBP1   | 9227   | LRAT     | L |
| 5948 | RBP2   | 9227   | LRAT     | L |
| 5950 | RBP4   | 7276   | TTR      | L |
| 5955 | RCN2   | 7917   | BAT3     | S |
| 5957 | RCV1   | 6011   | GRK1     | L |
| 5959 | RDH5   | 5995   | RGR      | L |
| 5959 | RDH5   | 6017   | RLBP1    | L |
| 5961 | RDS    | 6094   | ROM1     | L |
| 5961 | RDS    | 9402   | GRAP2    | L |
| 5962 | RDX    | 7248   | TSC1     | L |
| 5962 | RDX    | 7430   | VIL2     | L |
| 5962 | RDX    | 8904   | CPNE1    | L |
| 5962 | RDX    | 9351   | SLC9A3R2 | L |
| 5962 | RDX    | 9368   | SLC9A3R1 | L |
| 5962 | RDX    | 10672  | GNA13    | L |
| 5962 | RDX    | 131034 | CPNE4    | L |
| 5962 | RDX    | 221184 | CPNE2    | L |
| 5966 | REL    | 5970   | RELA     | L |
| 5966 | REL    | 6667   | SP1      | L |
| 5966 | REL    | 6908   | TBP      | L |
| 5968 | REG1B  | 7917   | BAT3     | S |
| 5970 | RELA   | 5981   | RFC1     | L |
| 5970 | RELA   | 6667   | SP1      | L |
| 5970 | RELA   | 6774   | STAT3    | L |
| 5970 | RELA   | 6872   | TAF1     | L |
| 5970 | RELA   | 6908   | TBP      | L |
| 5970 | RELA   | 7015   | TERT     | L |
| 5970 | RELA   | 7088   | TLE1     | L |
| 5970 | RELA   | 7159   | TP53BP2  | L |
| 5970 | RELA   | 7291   | TWIST1   | L |
| 5970 | RELA   | 8091   | HMGA2    | L |
| 5970 | RELA   | 8841   | HDAC3    | L |
| 5970 | RELA   | 8945   | BTRC     | L |
| 5970 | RELA   | 9325   | TRIP4    | L |
| 5970 | RELA   | 9612   | NCOR2    | L |
| 5970 | RELA   | 10401  | PIAS3    | L |
| 5970 | RELA   | 10614  | HEXIM1   | L |
| 5970 | RELA   | 10848  | PPP1R13L | L |
| 5970 | RELA   | 23421  | ITGB3BP  | L |
| 5970 | RELA   | 23474  | ETHE1    | L |
| 5970 | RELA   | 51147  | ING4     | L |
| 5970 | RELA   | 57761  | TRIB3    | L |
| 5970 | RELA   | 64320  | RNF25    | L |
| 5970 | RELA   | 222643 | UNC5CL   | L |
| 5972 | REN    | 5973   | RENBP    | L |
| 5972 | REN    | 10159  | ATP6AP2  | L |
| 5972 | REN    | 79047  | KCTD15   | S |
| 5973 | RENBP  | 9189   | ZBED1    | R |
| 5976 | RENT1  | 7290   | HIRA     | L |
| 5976 | RENT1  | 7920   | BAT5     | L |
| 5976 | RENT1  | 23049  | SMG1     | L |
| 5976 | RENT1  | 23248  | KIAA0460 | L |
| 5976 | RENT1  | 51504  | HSPC152  | L |

|      |       |        |               |    |
|------|-------|--------|---------------|----|
| 5976 | RENT1 | 51691  | LSM8          | L  |
| 5976 | RENT1 | 54464  | XRN1          | L  |
| 5976 | RENT1 | 55041  | PLEKHB2       | L  |
| 5976 | RENT1 | 55191  | NADSYN1       | L  |
| 5976 | RENT1 | 55902  | ACSS2         | L  |
| 5976 | RENT1 | 65110  | UPF3A         | L  |
| 5976 | RENT1 | 84528  | PEPP-2        | L  |
| 5976 | RENT1 | 84572  | GNPTG         | L  |
| 5978 | REST  | 10919  | EHMT2         | L  |
| 5978 | REST  | 23186  | RCOR1         | L  |
| 5978 | REST  | 23309  | SIN3B         | L  |
| 5979 | RET   | 6464   | SHC1          | L  |
| 5979 | RET   | 6714   | SRC           | L  |
| 5979 | RET   | 6774   | STAT3         | L  |
| 5979 | RET   | 9046   | DOK2          | L  |
| 5979 | RET   | 10818  | FRS2          | L  |
| 5980 | REV3L | 10459  | MAD2L2        | L  |
| 5981 | RFC1  | 5983   | RFC3          | L  |
| 5981 | RFC1  | 9338   | TCEAL1        | L  |
| 5981 | RFC1  | 23476  | BRD4          | L  |
| 5983 | RFC3  | 5984   | RFC4          | L  |
| 5984 | RFC4  | 5985   | RFC5          | RL |
| 5984 | RFC4  | 23476  | BRD4          | L  |
| 5985 | RFC5  | 9094   | UNC119        | S  |
| 5985 | RFC5  | 10980  | COPS6         | S  |
| 5985 | RFC5  | 51003  | MED31         | S  |
| 5985 | RFC5  | 55791  | C1orf103      | S  |
| 5985 | RFC5  | 84060  | DKFZP564O0523 | S  |
| 5987 | RFP   | 7704   | ZBTB16        | R  |
| 5987 | RFP   | 53826  | FXYD6         | S  |
| 5987 | RFP   | 57192  | MCOLN1        | S  |
| 5987 | RFP   | 57596  | KIAA1446      | R  |
| 5987 | RFP   | 79047  | KCTD15        | S  |
| 5987 | RFP   | 85302  | FBF1          | R  |
| 5987 | RFP   | 162952 | (null)        | S  |
| 5989 | RFX1  | 5990   | RFX2          | L  |
| 5989 | RFX1  | 5991   | RFX3          | L  |
| 5989 | RFX1  | 9500   | MAGED1        | S  |
| 5989 | RFX1  | 10474  | TADA3L        | S  |
| 5990 | RFX2  | 5991   | RFX3          | L  |
| 5990 | RFX2  | 5992   | RFX4          | L  |
| 5990 | RFX2  | 222546 | RFXDC1        | R  |
| 5991 | RFX3  | 5992   | RFX4          | L  |
| 5991 | RFX3  | 7186   | TRAF2         | R  |
| 5991 | RFX3  | 222546 | RFXDC1        | R  |
| 5993 | RFX5  | 5994   | RFXAP         | L  |
| 5993 | RFX5  | 8625   | RFXANK        | L  |
| 5994 | RFXAP | 8625   | RFXANK        | L  |
| 5995 | RGR   | 26128  | KIAA1279      | R  |
| 5996 | RGS1  | 7786   | MAP3K12       | S  |
| 5996 | RGS1  | 8848   | TSC22D1       | S  |
| 5996 | RGS1  | 10813  | UTP14A        | S  |
| 5996 | RGS1  | 65991  | FUNDC2        | S  |
| 5997 | RGS2  | 6331   | SCN5A         | S  |
| 5997 | RGS2  | 8508   | NIPSNAP1      | S  |
| 5997 | RGS2  | 8655   | DNCL1         | S  |
| 5997 | RGS2  | 9276   | COPB2         | L  |
| 5997 | RGS2  | 22981  | KIAA0980      | R  |
| 5997 | RGS2  | 28964  | GIT1          | S  |
| 5997 | RGS2  | 51699  | VPS29         | S  |
| 5997 | RGS2  | 54663  | WDR74         | S  |
| 5997 | RGS2  | 55738  | ARFGAP1       | S  |
| 5997 | RGS2  | 57622  | LRFN1         | S  |
| 5998 | RGS3  | 7531   | YWHAE         | L  |
| 5998 | RGS3  | 7534   | YWHAZ         | L  |
| 5998 | RGS3  | 10114  | HIPK3         | L  |
| 5999 | RGS4  | 9276   | COPB2         | L  |



|      |        |        |          |    |
|------|--------|--------|----------|----|
| 5999 | RGS4   | 23236  | PLCB1    | L  |
| 6000 | RGS7   | 7094   | TLN1     | L  |
| 6000 | RGS7   | 23557  | SNAPAP   | L  |
| 6002 | RGS12  | 23236  | PLCB1    | L  |
| 6004 | RGS16  | 10672  | GNA13    | L  |
| 6005 | RHAG   | 6521   | SLC4A1   | L  |
| 6009 | RHEB   | 7249   | TSC2     | L  |
| 6010 | RHO    | 6011   | GRK1     | L  |
| 6010 | RHO    | 6295   | SAG      | L  |
| 6014 | RIT2   | 7414   | VCL      | L  |
| 6015 | RING1  | 8535   | CBX4     | L  |
| 6015 | RING1  | 23429  | RYBP     | RL |
| 6015 | RING1  | 60528  | ELAC2    | L  |
| 6016 | RIT1   | 6018   | RLF      | L  |
| 6016 | RIT1   | 55791  | C1orf103 | S  |
| 6018 | RLF    | 55660  | FNBP3    | L  |
| 6019 | RLN2   | 59350  | LGR7     | L  |
| 6019 | RLN2   | 122042 | LGR8     | L  |
| 6035 | RNASE1 | 6050   | RNH1     | L  |
| 6041 | RNASEL | 6059   | ABCE1    | L  |
| 6045 | RNF2   | 7024   | TFCP2    | L  |
| 6045 | RNF2   | 8535   | CBX4     | S  |
| 6045 | RNF2   | 222019 | (null)   | S  |
| 6047 | RNF4   | 6498   | SKIL     | L  |
| 6047 | RNF4   | 6942   | TCF20    | L  |
| 6047 | RNF4   | 7227   | TRPS1    | L  |
| 6047 | RNF4   | 23598  | ZNF278   | L  |
| 6048 | RNF5   | 7322   | UBE2D2   | L  |
| 6048 | RNF5   | 7323   | UBE2D3   | L  |
| 6048 | RNF5   | 7324   | UBE2E1   | L  |
| 6048 | RNF5   | 7920   | BAT5     | L  |
| 6048 | RNF5   | 10477  | UBE2E3   | L  |
| 6048 | RNF5   | 29109  | FHOD1    | L  |
| 6051 | RNPEP  | 9372   | ZFYVE9   | L  |
| 6091 | ROBO1  | 6585   | SLIT1    | L  |
| 6091 | ROBO1  | 9353   | SLIT2    | L  |
| 6091 | ROBO1  | 10381  | TUBB3    | S  |
| 6091 | ROBO1  | 57522  | SRGAP1   | L  |
| 6092 | ROBO2  | 6749   | SSRP1    | S  |
| 6092 | ROBO2  | 84152  | PPP1R1B  | S  |
| 6092 | ROBO2  | 93145  | OLFM2    | S  |
| 6095 | RORA   | 10499  | NCOA2    | L  |
| 6096 | RORB   | 8648   | NCOA1    | L  |
| 6098 | ROS1   | 10451  | VAV3     | L  |
| 6100 | RP9    | 7307   | U2AF1    | L  |
| 6103 | RPGR   | 57096  | RPGRIP1  | L  |
| 6117 | RPA1   | 6118   | RPA2     | L  |
| 6117 | RPA1   | 6119   | RPA3     | L  |
| 6117 | RPA1   | 6919   | TCEA2    | S  |
| 6117 | RPA1   | 7507   | XPA      | L  |
| 6117 | RPA1   | 8991   | SELENBP1 | S  |
| 6117 | RPA1   | 11277  | TREX1    | L  |
| 6117 | RPA1   | 29935  | RPA4     | L  |
| 6117 | RPA1   | 51236  | C8orf30A | S  |
| 6117 | RPA1   | 55147  | RBM23    | S  |
| 6117 | RPA1   | 64400  | FTS      | S  |
| 6117 | RPA1   | 84164  | ASCC2    | S  |
| 6117 | RPA1   | 92797  | HELB     | L  |
| 6118 | RPA2   | 6119   | RPA3     | L  |
| 6118 | RPA2   | 6176   | RPLP1    | S  |
| 6118 | RPA2   | 6774   | STAT3    | L  |
| 6118 | RPA2   | 7088   | TLE1     | S  |
| 6118 | RPA2   | 7280   | TUBB2    | S  |
| 6118 | RPA2   | 7374   | UNG      | L  |
| 6118 | RPA2   | 7507   | XPA      | L  |
| 6118 | RPA2   | 9094   | UNC119   | S  |
| 6118 | RPA2   | 9709   | HERPUD1  | S  |

|      |        |        |               |   |
|------|--------|--------|---------------|---|
| 6118 | RPA2   | 10309  | UNG2          | L |
| 6118 | RPA2   | 10813  | UTP14A        | S |
| 6118 | RPA2   | 10980  | COPS6         | S |
| 6118 | RPA2   | 51003  | MED31         | S |
| 6118 | RPA2   | 51280  | GOLPH2        | S |
| 6118 | RPA2   | 55791  | C1orf103      | S |
| 6118 | RPA2   | 57562  | KIAA1377      | S |
| 6118 | RPA2   | 84060  | DKFZP564O0523 | S |
| 6119 | RPA3   | 29935  | RPA4          | L |
| 6122 | RPL3   | 375078 | (null)        | S |
| 6125 | RPL5   | 10527  | IPO7          | L |
| 6125 | RPL5   | 26019  | UPF2          | L |
| 6125 | RPL5   | 27250  | PDCD4         | L |
| 6128 | RPL6   | 6159   | RPL29         | L |
| 6129 | RPL7   | 7553   | ZNF7          | L |
| 6130 | RPL7A  | 57003  | GK001         | S |
| 6130 | RPL7A  | 81488  | GRINL1A       | S |
| 6132 | RPL8   | 6487   | ST3GAL3       | S |
| 6132 | RPL8   | 10425  | ARIH2         | S |
| 6132 | RPL8   | 11165  | NUDT3         | S |
| 6132 | RPL8   | 20924  | (null)        | S |
| 6132 | RPL8   | 54622  | ARFRP2        | S |
| 6132 | RPL8   | 54935  | DUSP23        | S |
| 6132 | RPL8   | 79096  | MGC4707       | S |
| 6132 | RPL8   | 80013  | C10orf97      | S |
| 6133 | RPL9   | 6188   | RPS3          | S |
| 6133 | RPL9   | 8470   | SORBS2        | S |
| 6133 | RPL9   | 124402 | LOC124402     | S |
| 6134 | RPL10  | 7525   | YES1          | L |
| 6134 | RPL10  | 9519   | TBPL1         | S |
| 6136 | RPL12  | 10951  | CBX1          | S |
| 6136 | RPL12  | 22142  | (null)        | S |
| 6136 | RPL12  | 51194  | IPO11         | L |
| 6138 | RPL15  | 10980  | COPS6         | S |
| 6139 | RPL17  | 10073  | RNUT1         | S |
| 6142 | RPL18A | 7786   | MAP3K12       | S |
| 6142 | RPL18A | 10188  | TNK2          | S |
| 6142 | RPL18A | 25873  | RPL36         | S |
| 6142 | RPL18A | 26150  | RIBC2         | S |
| 6144 | RPL21  | 11040  | PIM2          | S |
| 6146 | RPL22  | 55968  | NSFL1C        | S |
| 6152 | RPL24  | 51691  | LSM8          | L |
| 6154 | RPL26  | 10236  | HNRPR         | S |
| 6158 | RPL28  | 29058  | C20orf30      | S |
| 6159 | RPL29  | 55638  | FLJ20366      | S |
| 6165 | RPL35A | 6457   | SH3GL3        | S |
| 6168 | RPL37A | 55791  | C1orf103      | S |
| 6175 | RPLP0  | 65095  | FLJ12949      | S |
| 6176 | RPLP1  | 6181   | RPLP2         | L |
| 6176 | RPLP1  | 6303   | SAT           | S |
| 6176 | RPLP1  | 7280   | TUBB2         | S |
| 6176 | RPLP1  | 9551   | ATP5J2        | S |
| 6176 | RPLP1  | 11051  | NUDT21        | S |
| 6176 | RPLP1  | 11165  | NUDT3         | S |
| 6176 | RPLP1  | 25874  | BRP44         | S |
| 6176 | RPLP1  | 27250  | PDCD4         | L |
| 6176 | RPLP1  | 29117  | BRD7          | S |
| 6176 | RPLP1  | 55791  | C1orf103      | S |
| 6176 | RPLP1  | 56905  | DKFZP434H132  | S |
| 6176 | RPLP1  | 84164  | ASCC2         | S |
| 6176 | RPLP1  | 124930 | ANKRD13B      | S |
| 6182 | MRPL12 | 55092  | TMEM51        | S |
| 6183 | MRPS12 | 9094   | UNC119        | S |
| 6183 | MRPS12 | 11161  | C14orf1       | S |
| 6183 | MRPS12 | 55791  | C1orf103      | S |
| 6184 | RPN1   | 8193   | DPF1          | S |
| 6184 | RPN1   | 9808   | KIAA0087      | S |

|      |         |        |               |   |
|------|---------|--------|---------------|---|
| 6184 | RPN1    | 29978  | UBQLN2        | L |
| 6184 | RPN1    | 55884  | WSB2          | S |
| 6184 | RPN1    | 59307  | SIGIRR        | S |
| 6189 | RPS3A   | 6648   | SOD2          | S |
| 6189 | RPS3A   | 10284  | SAP18         | S |
| 6189 | RPS3A   | 55729  | ATF7IP        | L |
| 6189 | RPS3A   | 55741  | C20orf31      | S |
| 6189 | RPS3A   | 79096  | MGC4707       | S |
| 6189 | RPS3A   | 114034 | TOE1          | S |
| 6189 | RPS3A   | 152137 | C3orf6        | S |
| 6194 | RPS6    | 93145  | OLFM2         | S |
| 6195 | RPS6KA1 | 7529   | YWHAB         | L |
| 6195 | RPS6KA1 | 10766  | TOB2          | L |
| 6197 | RPS6KA3 | 8682   | PEA15         | L |
| 6198 | RPS6KB1 | 9618   | TRAF4         | L |
| 6198 | RPS6KB1 | 80347  | COASY         | L |
| 6201 | RPS7    | 10527  | IPO7          | L |
| 6203 | RPS9    | 11033  | CENTA1        | L |
| 6204 | RPS10   | 9001   | HAP1          | S |
| 6204 | RPS10   | 9232   | PTTG1         | L |
| 6204 | RPS10   | 11143  | MYST2         | S |
| 6207 | RPS13   | 27250  | PDCD4         | L |
| 6208 | RPS14   | 6880   | TAF9          | R |
| 6209 | RPS15   | 26019  | UPF2          | L |
| 6210 | RPS15A  | 7919   | BAT1          | L |
| 6223 | RPS19   | 7414   | VCL           | L |
| 6224 | RPS20   | 7414   | VCL           | L |
| 6224 | RPS20   | 10200  | MPHOSPH6      | L |
| 6224 | RPS20   | 51678  | MPP6          | L |
| 6227 | RPS21   | 7414   | VCL           | L |
| 6229 | RPS24   | 7414   | VCL           | L |
| 6230 | RPS25   | 9001   | HAP1          | S |
| 6230 | RPS25   | 9905   | RUTBC1        | S |
| 6230 | RPS25   | 26019  | UPF2          | L |
| 6231 | RPS26   | 90121  | RP1-112K5.2   | R |
| 6232 | RPS27   | 58478  | MASA          | S |
| 6233 | RPS27A  | 9802   | DAZAP2        | R |
| 6233 | RPS27A  | 26994  | RNF11         | L |
| 6233 | RPS27A  | 55683  | FLJ10081      | S |
| 6233 | RPS27A  | 57473  | GM632         | L |
| 6234 | RPS28   | 83755  | KRTAP4-12     | R |
| 6236 | RRAD    | 7169   | TPM2          | L |
| 6237 | RRAS    | 6654   | SOS1          | L |
| 6237 | RRAS    | 83593  | RASSF5        | L |
| 6238 | RRBP1   | 25865  | PRKD2         | L |
| 6238 | RRBP1   | 55729  | ATF7IP        | L |
| 6240 | RRM1    | 6241   | RRM2          | L |
| 6240 | RRM1    | 50484  | RRM2B         | L |
| 6240 | RRM1    | 55791  | C1orf103      | S |
| 6241 | RRM2    | 7157   | TP53          | L |
| 6242 | RTKN    | 30851  | TAX1BP3       | L |
| 6249 | RSN     | 8826   | IQGAP1        | L |
| 6252 | RTN1    | 7357   | UGCG          | L |
| 6252 | RTN1    | 79666  | PLEKHF2       | R |
| 6252 | RTN1    | 84067  | DKFZP566M1046 | R |
| 6256 | RXRA    | 6667   | SP1           | L |
| 6256 | RXRA    | 6722   | SRF           | L |
| 6256 | RXRA    | 6908   | TBP           | L |
| 6256 | RXRA    | 7025   | NR2F1         | L |
| 6256 | RXRA    | 7067   | THRA          | L |
| 6256 | RXRA    | 7376   | NR1H2         | L |
| 6256 | RXRA    | 7421   | VDR           | L |
| 6256 | RXRA    | 7704   | ZBTB16        | L |
| 6256 | RXRA    | 8031   | NCOA4         | L |
| 6256 | RXRA    | 8202   | NCOA3         | L |
| 6256 | RXRA    | 8204   | NRIP1         | L |
| 6256 | RXRA    | 8431   | NR0B2         | L |

|      |        |        |          |    |
|------|--------|--------|----------|----|
| 6256 | RXRA   | 8648   | NCOA1    | L  |
| 6256 | RXRA   | 8721   | EDF1     | L  |
| 6256 | RXRA   | 8805   | TRIM24   | L  |
| 6256 | RXRA   | 8856   | NR1I2    | L  |
| 6256 | RXRA   | 9025   | RNF8     | L  |
| 6256 | RXRA   | 9318   | COPS2    | L  |
| 6256 | RXRA   | 9322   | TRIP10   | L  |
| 6256 | RXRA   | 9325   | TRIP4    | L  |
| 6256 | RXRA   | 9326   | ZNHIT3   | L  |
| 6256 | RXRA   | 9862   | THRAP4   | L  |
| 6256 | RXRA   | 9970   | NR1I3    | L  |
| 6256 | RXRA   | 9971   | NR1H4    | L  |
| 6256 | RXRA   | 10474  | TADA3L   | L  |
| 6256 | RXRA   | 10499  | NCOA2    | L  |
| 6256 | RXRA   | 10891  | PPARGC1A | L  |
| 6256 | RXRA   | 10902  | BRD8     | L  |
| 6256 | RXRA   | 10912  | GADD45G  | L  |
| 6256 | RXRA   | 23421  | ITGB3BP  | L  |
| 6256 | RXRA   | 25865  | PRKD2    | L  |
| 6256 | RXRA   | 29982  | NRBF2    | L  |
| 6256 | RXRA   | 30836  | ERBP     | L  |
| 6256 | RXRA   | 55629  | PNRC2    | L  |
| 6256 | RXRA   | 56893  | UBQLN4   | S  |
| 6256 | RXRA   | 64324  | NSD1     | L  |
| 6256 | RXRA   | 64699  | TMPRSS3  | S  |
| 6256 | RXRA   | 221037 | JMJD1C   | L  |
| 6257 | RXRB   | 7067   | THRA     | L  |
| 6257 | RXRB   | 7376   | NR1H2    | L  |
| 6257 | RXRB   | 8202   | NCOA3    | L  |
| 6257 | RXRB   | 8204   | NRIP1    | L  |
| 6257 | RXRB   | 8405   | SPOP     | R  |
| 6257 | RXRB   | 8431   | NR0B2    | L  |
| 6257 | RXRB   | 8648   | NCOA1    | L  |
| 6257 | RXRB   | 8856   | NR1I2    | L  |
| 6257 | RXRB   | 10002  | NR2E3    | L  |
| 6257 | RXRB   | 11214  | AKAP13   | L  |
| 6258 | RXRG   | 6722   | SRF      | L  |
| 6258 | RXRG   | 7068   | THRB     | L  |
| 6258 | RXRG   | 56902  | LOC56902 | S  |
| 6258 | RXRG   | 90678  | LRSAM1   | S  |
| 6261 | RYR1   | 6262   | RYR2     | L  |
| 6261 | RYR1   | 6271   | S100A1   | L  |
| 6261 | RYR1   | 9454   | HOMER3   | L  |
| 6261 | RYR1   | 9455   | HOMER2   | L  |
| 6261 | RYR1   | 9456   | HOMER1   | L  |
| 6261 | RYR1   | 10345  | TRDN     | L  |
| 6262 | RYR2   | 6263   | RYR3     | L  |
| 6262 | RYR2   | 6717   | SRI      | L  |
| 6262 | RYR2   | 9456   | HOMER1   | L  |
| 6262 | RYR2   | 9472   | AKAP6    | L  |
| 6271 | S100A1 | 6275   | S100A4   | RL |
| 6271 | S100A1 | 6285   | S100B    | RL |
| 6271 | S100A1 | 6286   | S100P    | R  |
| 6271 | S100A1 | 27101  | CACYBP   | L  |
| 6271 | S100A1 | 60491  | NIF3L1   | R  |
| 6272 | SORT1  | 23062  | GGA2     | L  |
| 6272 | SORT1  | 26088  | GGA1     | L  |
| 6275 | S100A4 | 7917   | BAT3     | S  |
| 6275 | S100A4 | 9094   | UNC119   | S  |
| 6277 | S100A6 | 6285   | S100B    | L  |
| 6277 | S100A6 | 11319  | HSGT1    | L  |
| 6277 | S100A6 | 27101  | CACYBP   | L  |
| 6278 | S100A7 | 10048  | RANBP9   | L  |
| 6278 | S100A7 | 10987  | COPS5    | L  |
| 6279 | S100A8 | 6280   | S100A9   | L  |
| 6279 | S100A8 | 7157   | TP53     | S  |
| 6279 | S100A8 | 9094   | UNC119   | S  |

|      |         |        |               |   |
|------|---------|--------|---------------|---|
| 6279 | S100A8  | 11161  | C14orf1       | S |
| 6279 | S100A8  | 22142  | (null)        | S |
| 6279 | S100A8  | 22984  | PDCD11        | S |
| 6279 | S100A8  | 55791  | C1orf103      | S |
| 6279 | S100A8  | 64284  | RAB17         | S |
| 6279 | S100A8  | 64837  | KLC2          | S |
| 6279 | S100A8  | 84966  | IGSF21        | S |
| 6281 | S100A10 | 8605   | PLA2G4C       | L |
| 6281 | S100A10 | 9869   | SETDB1        | S |
| 6281 | S100A10 | 10980  | COPS6         | S |
| 6281 | S100A10 | 55503  | TRPV6         | L |
| 6282 | S100A11 | 6285   | S100B         | L |
| 6283 | S100A12 | 27101  | CACYBP        | L |
| 6284 | S100A13 | 6857   | SYT1          | L |
| 6284 | S100A13 | 7414   | VCL           | L |
| 6284 | S100A13 | 9796   | PHYHIP        | S |
| 6285 | S100B   | 7157   | TP53          | L |
| 6285 | S100B   | 8826   | IQGAP1        | L |
| 6285 | S100B   | 10397  | NDRG1         | L |
| 6285 | S100B   | 11319  | HSGT1         | L |
| 6285 | S100B   | 27101  | CACYBP        | L |
| 6286 | S100P   | 7430   | VIL2          | L |
| 6286 | S100P   | 27101  | CACYBP        | L |
| 6291 | SAA4    | 119369 | NUDT9P1       | R |
| 6294 | SAFB    | 7920   | BAT5          | L |
| 6294 | SAFB    | 8148   | TAF15         | L |
| 6294 | SAFB    | 8683   | SFRS9         | L |
| 6294 | SAFB    | 9667   | SAFB2         | L |
| 6294 | SAFB    | 54205  | CYCS          | L |
| 6297 | SALL2   | 79959  | C18orf9       | R |
| 6297 | SALL2   | 83637  | DKFZp761I2123 | R |
| 6299 | SALL1   | 7013   | TERF1         | L |
| 6299 | SALL1   | 7329   | UBE2I         | L |
| 6299 | SALL1   | 7341   | SUMO1         | L |
| 6300 | MAPK12  | 6641   | SNTB1         | L |
| 6300 | MAPK12  | 8550   | MAPKAPK5      | L |
| 6303 | SAT     | 7088   | TLE1          | S |
| 6303 | SAT     | 7157   | TP53          | S |
| 6303 | SAT     | 7280   | TUBB2         | S |
| 6303 | SAT     | 8525   | DGKZ          | S |
| 6303 | SAT     | 8703   | B4GALT3       | S |
| 6303 | SAT     | 9094   | UNC119        | S |
| 6303 | SAT     | 9869   | SETDB1        | S |
| 6303 | SAT     | 10524  | HTATIP        | S |
| 6303 | SAT     | 10813  | UTP14A        | S |
| 6303 | SAT     | 10980  | COPS6         | S |
| 6303 | SAT     | 11143  | MYST2         | S |
| 6303 | SAT     | 11161  | C14orf1       | S |
| 6303 | SAT     | 11194  | ABCB8         | S |
| 6303 | SAT     | 11244  | ZHX1          | S |
| 6303 | SAT     | 11257  | TP53AP1       | S |
| 6303 | SAT     | 22929  | SEPHS1        | S |
| 6303 | SAT     | 22980  | KIAA1049      | R |
| 6303 | SAT     | 23549  | DNPEP         | R |
| 6303 | SAT     | 27231  | ITGB1BP3      | S |
| 6303 | SAT     | 51003  | MED31         | S |
| 6303 | SAT     | 51204  | LOC51204      | R |
| 6303 | SAT     | 51631  | LUC7L2        | S |
| 6303 | SAT     | 51669  | TMEM66        | S |
| 6303 | SAT     | 55199  | FLJ10661      | R |
| 6303 | SAT     | 55791  | C1orf103      | S |
| 6303 | SAT     | 55848  | C9orf46       | S |
| 6303 | SAT     | 57562  | KIAA1377      | S |
| 6303 | SAT     | 60492  | MDS025        | S |
| 6303 | SAT     | 65991  | FUNDC2        | S |
| 6303 | SAT     | 81628  | TSC22D4       | R |
| 6303 | SAT     | 84060  | DKFZP564O0523 | S |

|      |        |        |           |   |
|------|--------|--------|-----------|---|
| 6303 | SAT    | 84141  | FLJ13391  | S |
| 6303 | SAT    | 84708  | LNK       | R |
| 6303 | SAT    | 84991  | RBM17     | R |
| 6303 | SAT    | 112483 | SAT2      | R |
| 6303 | SAT    | 117246 | FJSJ3     | R |
| 6303 | SAT    | 125476 | C18orf37  | S |
| 6304 | SATB1  | 7329   | UBE2I     | R |
| 6304 | SATB1  | 8467   | SMARCA5   | L |
| 6304 | SATB1  | 9219   | MTA2      | L |
| 6305 | SBF1   | 6839   | SUV39H1   | L |
| 6305 | SBF1   | 8898   | MTMR2     | L |
| 6310 | ATXN1  | 7531   | YWHAE     | L |
| 6310 | ATXN1  | 7534   | YWHAZ     | L |
| 6310 | ATXN1  | 7874   | USP7      | L |
| 6310 | ATXN1  | 8125   | ANP32A    | L |
| 6310 | ATXN1  | 8161   | COIL      | L |
| 6310 | ATXN1  | 10084  | PQBP1     | L |
| 6310 | ATXN1  | 56893  | UBQLN4    | L |
| 6326 | SCN2A2 | 6330   | SCN4B     | L |
| 6326 | SCN2A2 | 55160  | ARHGEF10L | S |
| 6326 | SCN2A2 | 55819  | RNF130    | S |
| 6329 | SCN4A  | 6641   | SNTB1     | L |
| 6329 | SCN4A  | 6645   | SNTB2     | L |
| 6331 | SCN5A  | 6641   | SNTB1     | L |
| 6331 | SCN5A  | 6645   | SNTB2     | L |
| 6337 | SCNN1A | 6338   | SCNN1B    | L |
| 6337 | SCNN1A | 7329   | UBE2I     | L |
| 6337 | SCNN1A | 11060  | WWP2      | L |
| 6337 | SCNN1A | 23327  | NEDD4L    | L |
| 6338 | SCNN1B | 6339   | SCNN1D    | L |
| 6338 | SCNN1B | 6340   | SCNN1G    | L |
| 6338 | SCNN1B | 6804   | STX1A     | L |
| 6338 | SCNN1B | 11060  | WWP2      | L |
| 6338 | SCNN1B | 23327  | NEDD4L    | L |
| 6339 | SCNN1D | 6340   | SCNN1G    | L |
| 6340 | SCNN1G | 6804   | STX1A     | L |
| 6340 | SCNN1G | 11060  | WWP2      | L |
| 6340 | SCNN1G | 23327  | NEDD4L    | L |
| 6342 | SCP2   | 10449  | ACAA2     | L |
| 6343 | SCT    | 6344   | SCTR      | L |
| 6343 | SCT    | 7433   | VIPR1     | L |
| 6344 | SCTR   | 27151  | CPAMD8    | L |
| 6348 | CCL3   | 6351   | CCL4      | L |
| 6348 | CCL3   | 7040   | TGFB1     | L |
| 6352 | CCL5   | 6382   | SDC1      | L |
| 6352 | CCL5   | 6385   | SDC4      | L |
| 6354 | CCL7   | 9638   | FEZ1      | S |
| 6356 | CCL11  | 7167   | TPI1      | S |
| 6358 | CCL14  | 10212  | DDX39     | L |
| 6361 | CCL17  | 7412   | VCAM1     | L |
| 6362 | CCL18  | 7088   | TLE1      | S |
| 6362 | CCL18  | 7157   | TP53      | S |
| 6362 | CCL18  | 9094   | UNC119    | S |
| 6362 | CCL18  | 11161  | C14orf1   | S |
| 6363 | CCL19  | 51554  | CCRL1     | L |
| 6366 | CCL21  | 51554  | CCRL1     | L |
| 6367 | CCL22  | 7412   | VCAM1     | L |
| 6370 | CCL25  | 10803  | CCR9      | L |
| 6370 | CCL25  | 51554  | CCRL1     | L |
| 6382 | SDC1   | 6386   | SDCBP     | L |
| 6382 | SDC1   | 8573   | CASK      | L |
| 6383 | SDC2   | 6386   | SDCBP     | L |
| 6383 | SDC2   | 6678   | SPARC     | L |
| 6383 | SDC2   | 7430   | VIL2      | L |
| 6383 | SDC2   | 8573   | CASK      | L |
| 6385 | SDC4   | 6386   | SDCBP     | L |
| 6385 | SDC4   | 7041   | TGFB111   | L |

|      |         |       |         |    |
|------|---------|-------|---------|----|
| 6385 | SDC4    | 8573  | CASK    | L  |
| 6385 | SDC4    | 10755 | GIPC1   | L  |
| 6386 | SDCBP   | 6659  | SOX4    | L  |
| 6386 | SDCBP   | 23705 | IGSF4   | L  |
| 6386 | SDCBP   | 29062 | HSPC049 | S  |
| 6387 | CXCL12  | 7852  | CXCR4   | L  |
| 6396 | SEC13L1 | 54521 | WDR44   | L  |
| 6396 | SEC13L1 | 89866 | LZTR2   | R  |
| 6401 | SELE    | 6402  | SELL    | L  |
| 6401 | SELE    | 7414  | VCL     | L  |
| 6402 | SELL    | 7430  | VIL2    | L  |
| 6403 | SELP    | 7430  | VIL2    | L  |
| 6403 | SELP    | 8907  | AP1M1   | L  |
| 6403 | SELP    | 9784  | SNX17   | L  |
| 6404 | SELPLG  | 8460  | TPST1   | L  |
| 6405 | SEMA3F  | 7317  | UBE1    | S  |
| 6405 | SEMA3F  | 7422  | VEGF    | L  |
| 6405 | SEMA3F  | 8828  | NRP2    | L  |
| 6405 | SEMA3F  | 8829  | NRP1    | L  |
| 6405 | SEMA3F  | 80723 | TMEM22  | S  |
| 6406 | SEMG1   | 6407  | SEMG2   | L  |
| 6406 | SEMG1   | 7051  | TGM1    | L  |
| 6407 | SEMG2   | 7051  | TGM1    | L  |
| 6416 | MAP2K4  | 7786  | MAP3K12 | L  |
| 6416 | MAP2K4  | 9043  | SPAG9   | L  |
| 6418 | SET     | 8125  | ANP32A  | L  |
| 6418 | SET     | 8290  | HIST3H3 | L  |
| 6418 | SET     | 8851  | CDK5R1  | L  |
| 6418 | SET     | 9015  | TAF1A   | L  |
| 6418 | SET     | 26040 | SETBP1  | L  |
| 6418 | SET     | 80764 | THAP7   | R  |
| 6421 | SFPQ    | 7094  | TLN1    | L  |
| 6421 | SFPQ    | 7150  | TOP1    | L  |
| 6421 | SFPQ    | 7316  | UBC     | S  |
| 6421 | SFPQ    | 7414  | VCL     | L  |
| 6421 | SFPQ    | 51155 | HN1     | S  |
| 6421 | SFPQ    | 56915 | EXOSC5  | L  |
| 6422 | SFRP1   | 7471  | WNT1    | L  |
| 6422 | SFRP1   | 7472  | WNT2    | L  |
| 6422 | SFRP1   | 8323  | FZD6    | L  |
| 6422 | SFRP1   | 54361 | WNT4    | L  |
| 6426 | SFRS1   | 6625  | SNRP70  | L  |
| 6426 | SFRS1   | 6733  | SRPK2   | L  |
| 6426 | SFRS1   | 7150  | TOP1    | L  |
| 6426 | SFRS1   | 7307  | U2AF1   | L  |
| 6426 | SFRS1   | 8233  | U2AF1L2 | L  |
| 6426 | SFRS1   | 8487  | SIP1    | L  |
| 6426 | SFRS1   | 8899  | PRPF4B  | L  |
| 6426 | SFRS1   | 9128  | PRPF4   | L  |
| 6426 | SFRS1   | 9169  | SFRS2IP | L  |
| 6426 | SFRS1   | 9295  | SFRS11  | L  |
| 6426 | SFRS1   | 10915 | TCERG1  | L  |
| 6426 | SFRS1   | 11168 | PSIP1   | L  |
| 6426 | SFRS1   | 11338 | U2AF2   | RL |
| 6426 | SFRS1   | 51755 | CRK7    | L  |
| 6426 | SFRS1   | 84708 | LNX     | R  |
| 6426 | SFRS1   | 85362 | (null)  | R  |
| 6426 | SFRS1   | 91746 | YT521   | L  |
| 6427 | SFRS2   | 6625  | SNRP70  | L  |
| 6427 | SFRS2   | 7307  | U2AF1   | L  |
| 6427 | SFRS2   | 8233  | U2AF1L2 | L  |
| 6427 | SFRS2   | 8487  | SIP1    | L  |
| 6427 | SFRS2   | 9169  | SFRS2IP | L  |
| 6427 | SFRS2   | 9295  | SFRS11  | L  |
| 6427 | SFRS2   | 9406  | ZNF265  | L  |
| 6427 | SFRS2   | 11033 | CENTA1  | L  |
| 6427 | SFRS2   | 51755 | CRK7    | L  |

|      |        |        |          |   |
|------|--------|--------|----------|---|
| 6427 | SFRS2  | 57018  | CCNL1    | L |
| 6427 | SFRS2  | 81669  | CCNL2    | L |
| 6427 | SFRS2  | 91746  | YT521    | L |
| 6428 | SFRS3  | 7094   | TLN1     | L |
| 6428 | SFRS3  | 8487   | SIP1     | L |
| 6428 | SFRS3  | 9169   | SFRS2IP  | L |
| 6428 | SFRS3  | 118460 | EXOSC6   | L |
| 6429 | SFRS4  | 6431   | SFRS6    | R |
| 6429 | SFRS4  | 9001   | HAP1     | S |
| 6429 | SFRS4  | 9169   | SFRS2IP  | L |
| 6429 | SFRS4  | 10250  | SRRM1    | L |
| 6430 | SFRS5  | 9398   | IGSF2    | S |
| 6430 | SFRS5  | 10188  | TNK2     | S |
| 6430 | SFRS5  | 10250  | SRRM1    | L |
| 6430 | SFRS5  | 93145  | OLFM2    | S |
| 6431 | SFRS6  | 10921  | RNPS1    | R |
| 6432 | SFRS7  | 8446   | DUSP11   | L |
| 6432 | SFRS7  | 23097  | CDC2L6   | L |
| 6432 | SFRS7  | 81669  | CCNL2    | L |
| 6434 | SFRS10 | 8683   | SFRS9    | L |
| 6434 | SFRS10 | 10625  | IVNS1ABP | S |
| 6434 | SFRS10 | 27288  | HNRNPG-T | L |
| 6434 | SFRS10 | 27316  | RBMX     | L |
| 6435 | SFTPA1 | 6436   | SFTPA2   | L |
| 6435 | SFTPA1 | 399687 | MYO18A   | L |
| 6436 | SFTPA2 | 22918  | C1QR1    | L |
| 6446 | SGK    | 9351   | SLC9A3R2 | L |
| 6446 | SGK    | 23327  | NEDD4L   | L |
| 6447 | SGNE1  | 56893  | UBQLN4   | S |
| 6449 | SGTA   | 6696   | SPP1     | R |
| 6449 | SGTA   | 6860   | SYT4     | R |
| 6449 | SGTA   | 7112   | TMPO     | L |
| 6449 | SGTA   | 7917   | BAT3     | L |
| 6449 | SGTA   | 30008  | EFEMP2   | R |
| 6449 | SGTA   | 50848  | F11R     | R |
| 6449 | SGTA   | 84888  | SPPL2A   | R |
| 6449 | SGTA   | 114897 | C1QTNF1  | R |
| 6449 | SGTA   | 123887 | ZG16     | R |
| 6452 | SH3BP2 | 6850   | SYK      | L |
| 6452 | SH3BP2 | 7018   | TF       | S |
| 6452 | SH3BP2 | 7409   | VAV1     | L |
| 6452 | SH3BP2 | 7410   | VAV2     | L |
| 6452 | SH3BP2 | 7535   | ZAP70    | L |
| 6452 | SH3BP2 | 10971  | YWHAQ    | L |
| 6452 | SH3BP2 | 27040  | LAT      | L |
| 6453 | ITSN1  | 6601   | SMARCC2  | S |
| 6453 | ITSN1  | 6616   | SNAP25   | L |
| 6453 | ITSN1  | 6654   | SOS1     | L |
| 6453 | ITSN1  | 8543   | LMO4     | L |
| 6453 | ITSN1  | 8773   | SNAP23   | L |
| 6453 | ITSN1  | 8867   | SYNJ1    | L |
| 6453 | ITSN1  | 8976   | WASL     | L |
| 6453 | ITSN1  | 9094   | UNC119   | S |
| 6453 | ITSN1  | 9522   | SCAMP1   | L |
| 6453 | ITSN1  | 27131  | SNX5     | S |
| 6453 | ITSN1  | 55052  | MRPL20   | S |
| 6453 | ITSN1  | 85439  | STN2     | L |
| 6455 | SH3GL1 | 6457   | SH3GL3   | S |
| 6455 | SH3GL1 | 8312   | AXIN1    | S |
| 6455 | SH3GL1 | 10015  | PDCD6IP  | L |
| 6455 | SH3GL1 | 30011  | SH3KBP1  | L |
| 6455 | SH3GL1 | 55211  | DPPA4    | S |
| 6455 | SH3GL1 | 63898  | SH2D4A   | R |
| 6456 | SH3GL2 | 6919   | TCEA2    | S |
| 6456 | SH3GL2 | 8491   | MAP4K3   | L |
| 6456 | SH3GL2 | 8751   | ADAM15   | L |
| 6456 | SH3GL2 | 8754   | ADAM9    | L |



|      |         |        |           |    |
|------|---------|--------|-----------|----|
| 6456 | SH3GL2  | 8867   | SYNJ1     | L  |
| 6456 | SH3GL2  | 10015  | PDCD6IP   | L  |
| 6456 | SH3GL2  | 25975  | EGFL6     | S  |
| 6457 | SH3GL3  | 6638   | SNRPN     | S  |
| 6457 | SH3GL3  | 7013   | TERF1     | S  |
| 6457 | SH3GL3  | 9398   | IGSF2     | S  |
| 6457 | SH3GL3  | 9568   | GPR51     | S  |
| 6457 | SH3GL3  | 10015  | PDCD6IP   | L  |
| 6457 | SH3GL3  | 10570  | DPYSL4    | S  |
| 6457 | SH3GL3  | 11079  | RER1      | S  |
| 6457 | SH3GL3  | 25975  | EGFL6     | S  |
| 6457 | SH3GL3  | 28966  | SNX24     | S  |
| 6457 | SH3GL3  | 30011  | SH3KBP1   | L  |
| 6457 | SH3GL3  | 55211  | DPPA4     | S  |
| 6457 | SH3GL3  | 55339  | WDR33     | S  |
| 6457 | SH3GL3  | 57658  | CALCOCO1  | S  |
| 6457 | SH3GL3  | 65990  | C16orf24  | S  |
| 6457 | SH3GL3  | 81890  | QTRT1     | S  |
| 6457 | SH3GL3  | 83638  | Bles03    | S  |
| 6457 | SH3GL3  | 84103  | C4orf17   | S  |
| 6457 | SH3GL3  | 114034 | TOE1      | S  |
| 6461 | SHB     | 6714   | SRC       | L  |
| 6461 | SHB     | 7409   | VAV1      | L  |
| 6461 | SHB     | 7535   | ZAP70     | L  |
| 6461 | SHB     | 9402   | GRAP2     | L  |
| 6461 | SHB     | 27040  | LAT       | L  |
| 6464 | SHC1    | 6667   | SP1       | L  |
| 6464 | SHC1    | 6714   | SRC       | L  |
| 6464 | SHC1    | 7535   | ZAP70     | L  |
| 6464 | SHC1    | 8660   | IRS2      | L  |
| 6464 | SHC1    | 9402   | GRAP2     | L  |
| 6464 | SHC1    | 10241  | NDP52     | R  |
| 6464 | SHC1    | 10451  | VAV3      | L  |
| 6464 | SHC1    | 11184  | MAP4K1    | L  |
| 6464 | SHC1    | 55824  | PAG1      | L  |
| 6464 | SHC1    | 79801  | SHCBP1    | L  |
| 6469 | SHH     | 8643   | PTCH2     | L  |
| 6470 | SHMT1   | 10301  | DLEU1     | S  |
| 6470 | SHMT1   | 11098  | PRSS23    | S  |
| 6477 | SIAH1   | 6500   | SKP1A     | L  |
| 6477 | SIAH1   | 6855   | SYP       | L  |
| 6477 | SIAH1   | 6907   | TBL1X     | L  |
| 6477 | SIAH1   | 7277   | TUBA1     | L  |
| 6477 | SIAH1   | 7278   | TUBA2     | L  |
| 6477 | SIAH1   | 7321   | UBE2D1    | L  |
| 6477 | SIAH1   | 7329   | UBE2I     | L  |
| 6477 | SIAH1   | 7846   | TUBA3     | L  |
| 6477 | SIAH1   | 8650   | NUMB      | L  |
| 6477 | SIAH1   | 8669   | EIF3S1    | L  |
| 6477 | SIAH1   | 9351   | SLC9A3R2  | L  |
| 6477 | SIAH1   | 10114  | HIPK3     | L  |
| 6477 | SIAH1   | 10376  | K-ALPHA-1 | L  |
| 6477 | SIAH1   | 10656  | KHDRBS3   | RL |
| 6477 | SIAH1   | 27101  | CACYBP    | L  |
| 6477 | SIAH1   | 27125  | AFF4      | R  |
| 6477 | SIAH1   | 51807  | TUBA8     | L  |
| 6478 | SIAH2   | 6855   | SYP       | L  |
| 6478 | SIAH2   | 7186   | TRAF2     | L  |
| 6478 | SIAH2   | 7329   | UBE2I     | L  |
| 6478 | SIAH2   | 7409   | VAV1      | L  |
| 6478 | SIAH2   | 9246   | UBE2L6    | L  |
| 6478 | SIAH2   | 10114  | HIPK3     | L  |
| 6478 | SIAH2   | 27101  | CACYBP    | L  |
| 6487 | ST3GAL3 | 7276   | TTR       | S  |
| 6487 | ST3GAL3 | 9925   | ZBTB5     | S  |
| 6487 | ST3GAL3 | 10066  | SCAMP2    | S  |
| 6494 | SIPA1   | 64326  | RFWD2     | L  |

|      |        |        |          |   |
|------|--------|--------|----------|---|
| 6495 | SIX1   | 7088   | TLE1     | L |
| 6495 | SIX1   | 11007  | DIPA     | R |
| 6496 | SIX3   | 7088   | TLE1     | L |
| 6496 | SIX3   | 7090   | TLE3     | L |
| 6496 | SIX3   | 8013   | NR4A3    | L |
| 6496 | SIX3   | 51053  | GMNN     | L |
| 6497 | SKI    | 6498   | SKIL     | L |
| 6497 | SKI    | 22938  | SNW1     | L |
| 6497 | SKI    | 28996  | HIPK2    | L |
| 6498 | SKIL   | 6625   | SNRP70   | L |
| 6498 | SKIL   | 6731   | SRP72    | L |
| 6498 | SKIL   | 7169   | TPM2     | L |
| 6498 | SKIL   | 7329   | UBE2I    | L |
| 6498 | SKIL   | 7750   | ZNF198   | L |
| 6498 | SKIL   | 7980   | TFPI2    | L |
| 6498 | SKIL   | 8404   | SPARCL1  | L |
| 6498 | SKIL   | 8458   | TTF2     | L |
| 6498 | SKIL   | 8535   | CBX4     | L |
| 6498 | SKIL   | 8554   | PIAS1    | L |
| 6498 | SKIL   | 8881   | CDC16    | L |
| 6498 | SKIL   | 8904   | CPNE1    | L |
| 6498 | SKIL   | 9205   | ZMYM5    | L |
| 6498 | SKIL   | 9611   | NCOR1    | L |
| 6498 | SKIL   | 9612   | NCOR2    | L |
| 6498 | SKIL   | 9784   | SNX17    | L |
| 6498 | SKIL   | 9869   | SETDB1   | L |
| 6498 | SKIL   | 10401  | PIAS3    | L |
| 6498 | SKIL   | 10773  | ZNF482   | L |
| 6498 | SKIL   | 10973  | ASCC3    | L |
| 6498 | SKIL   | 11124  | FAF1     | L |
| 6498 | SKIL   | 22795  | NID2     | L |
| 6498 | SKIL   | 22906  | OIP106   | L |
| 6498 | SKIL   | 22907  | DHX30    | L |
| 6498 | SKIL   | 23140  | ZZEF1    | L |
| 6498 | SKIL   | 23328  | SASH1    | L |
| 6498 | SKIL   | 23462  | HEY1     | L |
| 6498 | SKIL   | 23499  | MACF1    | L |
| 6498 | SKIL   | 25987  | LRRC54   | L |
| 6498 | SKIL   | 26508  | HEYL     | L |
| 6498 | SKIL   | 26525  | IL1F5    | L |
| 6498 | SKIL   | 29761  | USP25    | L |
| 6498 | SKIL   | 29920  | PYCR2    | L |
| 6498 | SKIL   | 51343  | FZR1     | L |
| 6498 | SKIL   | 51523  | CXXC5    | L |
| 6498 | SKIL   | 51567  | TTRAP    | L |
| 6498 | SKIL   | 51588  | PIAS4    | L |
| 6498 | SKIL   | 51720  | RAP80    | L |
| 6498 | SKIL   | 55223  | TRIM62   | L |
| 6498 | SKIL   | 60314  | C12orf10 | L |
| 6498 | SKIL   | 64397  | ZFP106   | L |
| 6498 | SKIL   | 64750  | SMURF2   | L |
| 6498 | SKIL   | 79586  | CHPF     | L |
| 6498 | SKIL   | 79710  | MORC4    | L |
| 6498 | SKIL   | 79842  | ZBTB3    | L |
| 6498 | SKIL   | 79987  | SVEP1    | L |
| 6498 | SKIL   | 113026 | PLCD3    | L |
| 6498 | SKIL   | 131034 | CPNE4    | L |
| 6498 | SKIL   | 157922 | CAMSAP1  | L |
| 6498 | SKIL   | 168451 | THAP5    | L |
| 6498 | SKIL   | 204851 | HIPK1    | L |
| 6498 | SKIL   | 221184 | CPNE2    | L |
| 6499 | SKIV2L | 6628   | SNRPB    | L |
| 6499 | SKIV2L | 9948   | WDR1     | L |
| 6499 | SKIV2L | 23203  | PMPCA    | L |
| 6499 | SKIV2L | 54464  | XRN1     | L |
| 6499 | SKIV2L | 54512  | EXOSC4   | L |
| 6500 | SKP1A  | 6502   | SKP2     | L |

|      |         |        |          |   |
|------|---------|--------|----------|---|
| 6500 | SKP1A   | 6907   | TBL1X    | L |
| 6500 | SKP1A   | 8454   | CUL1     | L |
| 6500 | SKP1A   | 8945   | BTRC     | L |
| 6500 | SKP1A   | 9820   | CUL7     | L |
| 6500 | SKP1A   | 9978   | RBX1     | L |
| 6500 | SKP1A   | 11269  | DDX19B   | S |
| 6500 | SKP1A   | 25793  | FBXO7    | L |
| 6500 | SKP1A   | 25827  | FBXL2    | L |
| 6500 | SKP1A   | 26190  | FBXW2    | L |
| 6500 | SKP1A   | 26224  | FBXL3    | L |
| 6500 | SKP1A   | 26232  | FBXO2    | L |
| 6500 | SKP1A   | 26234  | FBXL5    | L |
| 6500 | SKP1A   | 26235  | FBXL4    | L |
| 6500 | SKP1A   | 26270  | FBXO6    | L |
| 6500 | SKP1A   | 26271  | FBXO5    | L |
| 6500 | SKP1A   | 26272  | FBXO4    | L |
| 6500 | SKP1A   | 27101  | CACYBP   | L |
| 6500 | SKP1A   | 55030  | FBXO34   | S |
| 6500 | SKP1A   | 55294  | FBXW7    | L |
| 6500 | SKP1A   | 83461  | CDCA3    | L |
| 6500 | SKP1A   | 84893  | FBXO18   | L |
| 6500 | SKP1A   | 114907 | FBXO32   | L |
| 6502 | SKP2    | 6929   | TCF3     | L |
| 6502 | SKP2    | 8409   | UXT      | L |
| 6502 | SKP2    | 8454   | CUL1     | L |
| 6502 | SKP2    | 51343  | FZR1     | L |
| 6502 | SKP2    | 81620  | CDT1     | L |
| 6503 | SLA     | 6850   | SYK      | L |
| 6503 | SLA     | 7409   | VAV1     | L |
| 6503 | SLA     | 7535   | ZAP70    | L |
| 6503 | SLA     | 27040  | LAT      | L |
| 6505 | SLC1A1  | 10550  | ARL6IP5  | L |
| 6509 | SLC1A4  | 30816  | ERVWE1   | L |
| 6510 | SLC1A5  | 30816  | ERVWE1   | L |
| 6510 | SLC1A5  | 79735  | TBC1D17  | S |
| 6511 | SLC1A6  | 9826   | ARHGEF11 | L |
| 6511 | SLC1A6  | 10425  | ARIH2    | S |
| 6511 | SLC1A6  | 286397 | (null)   | S |
| 6513 | SLC2A1  | 7329   | UBE2I    | L |
| 6513 | SLC2A1  | 7341   | SUMO1    | L |
| 6513 | SLC2A1  | 10755  | GIPC1    | L |
| 6513 | SLC2A1  | 10980  | COPS6    | S |
| 6517 | SLC2A4  | 7329   | UBE2I    | L |
| 6517 | SLC2A4  | 30846  | EHD2     | L |
| 6520 | SLC3A2  | 8140   | SLC7A5   | L |
| 6520 | SLC3A2  | 9056   | SLC7A7   | L |
| 6520 | SLC3A2  | 23657  | SLC7A11  | L |
| 6521 | SLC4A1  | 22950  | SLC4A1AP | L |
| 6529 | SLC6A1  | 6804   | STX1A    | L |
| 6531 | SLC6A3  | 6622   | SNCA     | L |
| 6531 | SLC6A3  | 7041   | TGFB111  | L |
| 6532 | SLC6A4  | 6804   | STX1A    | L |
| 6536 | SLC6A9  | 6804   | STX1A    | L |
| 6548 | SLC9A1  | 9448   | MAP4K4   | L |
| 6548 | SLC9A1  | 11261  | CHP      | L |
| 6548 | SLC9A1  | 54997  | TSC      | L |
| 6549 | SLC9A2  | 6708   | SPTA1    | L |
| 6549 | SLC9A2  | 6709   | SPTAN1   | L |
| 6549 | SLC9A2  | 6714   | SRC      | L |
| 6549 | SLC9A2  | 11261  | CHP      | L |
| 6550 | SLC9A3  | 9351   | SLC9A3R2 | L |
| 6550 | SLC9A3  | 9368   | SLC9A3R1 | L |
| 6550 | SLC9A3  | 11261  | CHP      | L |
| 6553 | SLC9A5  | 11261  | CHP      | L |
| 6558 | SLC12A2 | 27347  | STK39    | L |
| 6559 | SLC12A3 | 65266  | WNK4     | L |
| 6560 | SLC12A4 | 55729  | ATF7IP   | L |

|      |         |        |          |   |
|------|---------|--------|----------|---|
| 6569 | SLC34A1 | 9368   | SLC9A3R1 | L |
| 6576 | SLC25A1 | 7414   | VCL      | L |
| 6580 | SLC22A1 | 29956  | LASS2    | L |
| 6594 | SMARCA1 | 9031   | BAZ1B    | L |
| 6595 | SMARCA2 | 6760   | SS18     | L |
| 6595 | SMARCA2 | 9031   | BAZ1B    | L |
| 6597 | SMARCA4 | 6760   | SS18     | L |
| 6597 | SMARCA4 | 6773   | STAT2    | L |
| 6597 | SMARCA4 | 6794   | STK11    | L |
| 6597 | SMARCA4 | 8841   | HDAC3    | L |
| 6597 | SMARCA4 | 9031   | BAZ1B    | L |
| 6597 | SMARCA4 | 10200  | MPHOSPH6 | L |
| 6597 | SMARCA4 | 23468  | CBX5     | L |
| 6597 | SMARCA4 | 51678  | MPP6     | L |
| 6598 | SMARCB1 | 6714   | SRC      | L |
| 6598 | SMARCB1 | 7157   | TP53     | L |
| 6598 | SMARCB1 | 7514   | XPO1     | L |
| 6598 | SMARCB1 | 8089   | YEATS4   | L |
| 6598 | SMARCB1 | 9031   | BAZ1B    | L |
| 6598 | SMARCB1 | 10579  | TACC2    | L |
| 6598 | SMARCB1 | 56893  | UBQLN4   | S |
| 6599 | SMARCC1 | 9031   | BAZ1B    | L |
| 6599 | SMARCC1 | 10661  | KLF1     | L |
| 6601 | SMARCC2 | 9031   | BAZ1B    | L |
| 6601 | SMARCC2 | 9796   | PHYHIP   | S |
| 6602 | SMARCD1 | 9031   | BAZ1B    | L |
| 6602 | SMARCD1 | 10241  | NDP52    | R |
| 6602 | SMARCD1 | 11007  | DIPA     | R |
| 6602 | SMARCD1 | 23641  | LDOC1    | R |
| 6602 | SMARCD1 | 83878  | USHBP1   | R |
| 6603 | SMARCD2 | 54464  | XRN1     | L |
| 6605 | SMARCE1 | 6714   | SRC      | L |
| 6605 | SMARCE1 | 8202   | NCOA3    | L |
| 6605 | SMARCE1 | 8648   | NCOA1    | L |
| 6605 | SMARCE1 | 9031   | BAZ1B    | L |
| 6605 | SMARCE1 | 10499  | NCOA2    | L |
| 6606 | SMN1    | 7157   | TP53     | L |
| 6606 | SMN1    | 7917   | BAT3     | S |
| 6606 | SMN1    | 8161   | COIL     | L |
| 6606 | SMN1    | 8487   | SIP1     | L |
| 6606 | SMN1    | 8880   | FUBP1    | L |
| 6606 | SMN1    | 9094   | UNC119   | S |
| 6606 | SMN1    | 9406   | ZNF265   | L |
| 6606 | SMN1    | 10236  | HNRPR    | L |
| 6606 | SMN1    | 10248  | POP7     | L |
| 6606 | SMN1    | 10492  | SYNCRIP  | L |
| 6606 | SMN1    | 10980  | COPS6    | S |
| 6606 | SMN1    | 11157  | LSM6     | L |
| 6606 | SMN1    | 23658  | LSM5     | L |
| 6606 | SMN1    | 25804  | LSM4     | L |
| 6606 | SMN1    | 25929  | GEMIN5   | L |
| 6606 | SMN1    | 26578  | OSTF1    | L |
| 6606 | SMN1    | 27257  | LSM1     | L |
| 6606 | SMN1    | 27258  | LSM3     | L |
| 6606 | SMN1    | 51690  | LSM7     | L |
| 6606 | SMN1    | 54433  | NOLA1    | L |
| 6606 | SMN1    | 55093  | C8orf32  | R |
| 6606 | SMN1    | 55791  | C1orf103 | S |
| 6606 | SMN1    | 57819  | LSM2     | L |
| 6606 | SMN1    | 79760  | GEMIN7   | L |
| 6606 | SMN1    | 114823 | LENG8    | R |
| 6606 | SMN1    | 134353 | LSM11    | L |
| 6607 | SMN2    | 6628   | SNRPB    | L |
| 6607 | SMN2    | 6629   | SNRPB2   | L |
| 6607 | SMN2    | 6632   | SNRPD1   | L |
| 6607 | SMN2    | 6633   | SNRPD2   | L |
| 6607 | SMN2    | 6634   | SNRPD3   | L |

|      |        |        |           |    |
|------|--------|--------|-----------|----|
| 6607 | SMN2   | 6635   | SNRPE     | L  |
| 6607 | SMN2   | 6636   | SNRPF     | L  |
| 6607 | SMN2   | 6637   | SNRPG     | L  |
| 6607 | SMN2   | 8487   | SIP1      | L  |
| 6607 | SMN2   | 11218  | DDX20     | L  |
| 6607 | SMN2   | 50628  | GEMIN4    | L  |
| 6608 | SMO    | 8643   | PTCH2     | L  |
| 6612 | SUMO3  | 7329   | UBE2I     | L  |
| 6612 | SUMO3  | 7431   | VIM       | S  |
| 6612 | SUMO3  | 10054  | UBA2      | L  |
| 6612 | SUMO3  | 59343  | SENP2     | L  |
| 6613 | SUMO2  | 7329   | UBE2I     | L  |
| 6613 | SUMO2  | 7431   | VIM       | S  |
| 6613 | SUMO2  | 9734   | HDAC9     | L  |
| 6613 | SUMO2  | 9759   | HDAC4     | L  |
| 6613 | SUMO2  | 26168  | SENP3     | L  |
| 6613 | SUMO2  | 84232  | MAF1      | S  |
| 6613 | SUMO2  | 84676  | TRIM63    | L  |
| 6614 | SN     | 6693   | SPN       | L  |
| 6614 | SN     | 7143   | TNR       | L  |
| 6616 | SNAP25 | 6804   | STX1A     | SL |
| 6616 | SNAP25 | 6810   | STX4A     | L  |
| 6616 | SNAP25 | 6812   | STXBP1    | L  |
| 6616 | SNAP25 | 6845   | SYBL1     | L  |
| 6616 | SNAP25 | 6857   | SYT1      | L  |
| 6616 | SNAP25 | 8673   | VAMP8     | L  |
| 6616 | SNAP25 | 8676   | STX11     | RS |
| 6616 | SNAP25 | 23557  | SNAPAP    | L  |
| 6616 | SNAP25 | 29091  | STXBP6    | L  |
| 6616 | SNAP25 | 80725  | SNIP      | L  |
| 6616 | SNAP25 | 112476 | LOC112476 | S  |
| 6616 | SNAP25 | 114088 | TRIM9     | L  |
| 6616 | SNAP25 | 143425 | SYT9      | L  |
| 6617 | SNAPC1 | 6619   | SNAPC3    | L  |
| 6617 | SNAPC1 | 6621   | SNAPC4    | L  |
| 6618 | SNAPC2 | 6621   | SNAPC4    | L  |
| 6618 | SNAPC2 | 6908   | TBP       | L  |
| 6620 | SNCB   | 6622   | SNCA      | L  |
| 6620 | SNCB   | 80152  | FLJ13111  | S  |
| 6621 | SNAPC4 | 6908   | TBP       | L  |
| 6621 | SNAPC4 | 55290  | BRF2      | L  |
| 6622 | SNCA   | 7054   | TH        | L  |
| 6622 | SNCA   | 7345   | UCHL1     | L  |
| 6622 | SNCA   | 7529   | YWHAB     | L  |
| 6622 | SNCA   | 7531   | YWHAE     | L  |
| 6622 | SNCA   | 7846   | TUBA3     | L  |
| 6622 | SNCA   | 8878   | SQSTM1    | L  |
| 6622 | SNCA   | 9479   | MAPK8IP1  | L  |
| 6622 | SNCA   | 9627   | SNCAIP    | L  |
| 6622 | SNCA   | 54205  | CYCS      | L  |
| 6625 | SNRP70 | 8487   | SIP1      | L  |
| 6625 | SNRP70 | 9150   | CTDP1     | L  |
| 6625 | SNRP70 | 9169   | SFRS2IP   | L  |
| 6625 | SNRP70 | 9295   | SFRS11    | L  |
| 6625 | SNRP70 | 9406   | ZNF265    | L  |
| 6625 | SNRP70 | 10521  | DDX17     | L  |
| 6625 | SNRP70 | 10772  | FUSIP1    | L  |
| 6625 | SNRP70 | 11051  | NUDT21    | L  |
| 6625 | SNRP70 | 25865  | PRKD2     | L  |
| 6625 | SNRP70 | 26994  | RNF11     | L  |
| 6625 | SNRP70 | 55660  | FNBP3     | L  |
| 6625 | SNRP70 | 64750  | SMURF2    | L  |
| 6626 | SNRPA  | 7414   | VCL       | L  |
| 6626 | SNRPA  | 10914  | PAPOLA    | L  |
| 6626 | SNRPA  | 79002  | MGC2803   | R  |
| 6627 | SNRPA1 | 6629   | SNRPB2    | L  |
| 6628 | SNRPB  | 6634   | SNRPD3    | L  |

|      |        |        |          |   |
|------|--------|--------|----------|---|
| 6628 | SNRPB  | 7414   | VCL      | L |
| 6628 | SNRPB  | 8940   | TOP3B    | L |
| 6628 | SNRPB  | 9150   | CTDP1    | L |
| 6628 | SNRPB  | 11161  | C14orf1  | S |
| 6628 | SNRPB  | 25929  | GEMIN5   | L |
| 6628 | SNRPB  | 84164  | ASCC2    | S |
| 6628 | SNRPB  | 134353 | LSM11    | L |
| 6632 | SNRPD1 | 6633   | SNRPD2   | L |
| 6632 | SNRPD1 | 10419  | SKB1     | L |
| 6632 | SNRPD1 | 11218  | DDX20    | L |
| 6632 | SNRPD1 | 25929  | GEMIN5   | L |
| 6632 | SNRPD1 | 51691  | LSM8     | L |
| 6632 | SNRPD1 | 134353 | LSM11    | L |
| 6633 | SNRPD2 | 10524  | HTATIP   | S |
| 6633 | SNRPD2 | 11157  | LSM6     | L |
| 6633 | SNRPD2 | 11218  | DDX20    | L |
| 6633 | SNRPD2 | 25929  | GEMIN5   | L |
| 6633 | SNRPD2 | 57819  | LSM2     | L |
| 6633 | SNRPD2 | 79833  | GEMIN6   | L |
| 6633 | SNRPD2 | 134353 | LSM11    | L |
| 6634 | SNRPD3 | 7094   | TLN1     | L |
| 6634 | SNRPD3 | 10419  | SKB1     | L |
| 6634 | SNRPD3 | 11218  | DDX20    | L |
| 6634 | SNRPD3 | 25929  | GEMIN5   | L |
| 6634 | SNRPD3 | 27258  | LSM3     | L |
| 6634 | SNRPD3 | 51690  | LSM7     | L |
| 6635 | SNRPE  | 6637   | SNRPG    | L |
| 6635 | SNRPE  | 7094   | TLN1     | L |
| 6635 | SNRPE  | 7414   | VCL      | L |
| 6635 | SNRPE  | 11218  | DDX20    | L |
| 6635 | SNRPE  | 23658  | LSM5     | L |
| 6635 | SNRPE  | 25804  | LSM4     | L |
| 6635 | SNRPE  | 25929  | GEMIN5   | L |
| 6635 | SNRPE  | 27258  | LSM3     | L |
| 6635 | SNRPE  | 57819  | LSM2     | L |
| 6635 | SNRPE  | 79833  | GEMIN6   | L |
| 6636 | SNRPF  | 7094   | TLN1     | L |
| 6636 | SNRPF  | 7414   | VCL      | L |
| 6636 | SNRPF  | 11218  | DDX20    | L |
| 6636 | SNRPF  | 23658  | LSM5     | L |
| 6637 | SNRPG  | 6867   | TACC1    | L |
| 6637 | SNRPG  | 7088   | TLE1     | S |
| 6637 | SNRPG  | 7414   | VCL      | L |
| 6637 | SNRPG  | 10980  | COPS6    | S |
| 6637 | SNRPG  | 11161  | C14orf1  | S |
| 6637 | SNRPG  | 11218  | DDX20    | L |
| 6637 | SNRPG  | 57562  | KIAA1377 | S |
| 6637 | SNRPG  | 115265 | DDIT4L   | R |
| 6638 | SNRPN  | 7157   | TP53     | S |
| 6638 | SNRPN  | 55791  | C1orf103 | S |
| 6640 | SNTA1  | 7402   | UTRN     | L |
| 6640 | SNTA1  | 8525   | DGKZ     | L |
| 6640 | SNTA1  | 27165  | GLS2     | L |
| 6640 | SNTA1  | 112950 | MED8     | S |
| 6641 | SNTB1  | 8525   | DGKZ     | L |
| 6642 | SNX1   | 6643   | SNX2     | L |
| 6642 | SNX1   | 9146   | HGS      | L |
| 6642 | SNX1   | 55737  | VPS35    | L |
| 6643 | SNX2   | 8723   | SNX4     | L |
| 6643 | SNX2   | 23048  | FNBP1    | L |
| 6645 | SNTB2  | 7402   | UTRN     | L |
| 6645 | SNTB2  | 8525   | DGKZ     | L |
| 6645 | SNTB2  | 23139  | MAST2    | L |
| 6647 | SOD1   | 9973   | CCS      | L |
| 6648 | SOD2   | 51608  | C7orf20  | S |
| 6648 | SOD2   | 57670  | KIAA1549 | S |
| 6648 | SOD2   | 79159  | MGC3731  | S |

|      |        |        |           |   |
|------|--------|--------|-----------|---|
| 6648 | SOD2   | 307255 | (null)    | S |
| 6651 | SON    | 7205   | TRIP6     | L |
| 6651 | SON    | 55660  | FNBP3     | L |
| 6651 | SON    | 79753  | SNIP1     | L |
| 6653 | SORL1  | 23062  | GGA2      | L |
| 6653 | SORL1  | 26088  | GGA1      | L |
| 6654 | SOS1   | 7535   | ZAP70     | L |
| 6654 | SOS1   | 8440   | NCK2      | L |
| 6654 | SOS1   | 10006  | ABI1      | L |
| 6654 | SOS1   | 10750  | GRAP      | L |
| 6654 | SOS1   | 10818  | FRS2      | L |
| 6654 | SOS1   | 29993  | PACSIN1   | L |
| 6654 | SOS1   | 30011  | SH3KBP1   | L |
| 6654 | SOS1   | 51225  | ABI3      | L |
| 6655 | SOS2   | 9402   | GRAP2     | L |
| 6655 | SOS2   | 10006  | ABI1      | L |
| 6662 | SOX9   | 7186   | TRAF2     | L |
| 6662 | SOX9   | 23013  | SPEN      | L |
| 6667 | SP1    | 6670   | SP3       | L |
| 6667 | SP1    | 6671   | SP4       | L |
| 6667 | SP1    | 6720   | SREBF1    | L |
| 6667 | SP1    | 6721   | SREBF2    | L |
| 6667 | SP1    | 6874   | TAF4      | L |
| 6667 | SP1    | 6886   | TAL1      | L |
| 6667 | SP1    | 7025   | NR2F1     | L |
| 6667 | SP1    | 7071   | KLF10     | L |
| 6667 | SP1    | 7528   | YY1       | L |
| 6667 | SP1    | 7704   | ZBTB16    | L |
| 6667 | SP1    | 8863   | PER3      | L |
| 6667 | SP1    | 9314   | KLF4      | L |
| 6667 | SP1    | 10291  | SF3A1     | L |
| 6667 | SP1    | 10848  | PPP1R13L  | L |
| 6667 | SP1    | 23126  | POGZ      | L |
| 6667 | SP1    | 29102  | RNASEN    | L |
| 6667 | SP1    | 51341  | ZBTB7A    | L |
| 6667 | SP1    | 57708  | MIER1     | L |
| 6670 | SP3    | 8859   | STK19     | L |
| 6670 | SP3    | 51341  | ZBTB7A    | L |
| 6671 | SP4    | 51341  | ZBTB7A    | L |
| 6672 | SP100  | 7341   | SUMO1     | R |
| 6672 | SP100  | 10951  | CBX1      | L |
| 6672 | SP100  | 11335  | CBX3      | L |
| 6672 | SP100  | 23468  | CBX5      | L |
| 6672 | SP100  | 28996  | HIPK2     | L |
| 6672 | SP100  | 79753  | SNIP1     | L |
| 6678 | SPARC  | 7040   | TGFB1     | L |
| 6678 | SPARC  | 7052   | TGM2      | L |
| 6678 | SPARC  | 7057   | THBS1     | L |
| 6678 | SPARC  | 7422   | VEGF      | L |
| 6687 | SPG7   | 10155  | TRIM28    | S |
| 6687 | SPG7   | 22913  | RALY      | S |
| 6687 | SPG7   | 55791  | C1orf103  | S |
| 6687 | SPG7   | 83755  | KRTAP4-12 | R |
| 6688 | SPI1   | 6689   | SPIB      | L |
| 6689 | SPIB   | 6908   | TBP       | L |
| 6692 | SPINT1 | 6768   | ST14      | L |
| 6692 | SPINT1 | 55603  | FAM46A    | L |
| 6693 | SPN    | 7430   | VIL2      | L |
| 6696 | SPP1   | 9260   | PDLIM7    | R |
| 6696 | SPP1   | 55324  | ABCF3     | S |
| 6696 | SPP1   | 56259  | CTNBL1    | R |
| 6702 | SPRR2C | 8975   | USP13     | S |
| 6708 | SPTA1  | 6710   | SPTB      | L |
| 6708 | SPTA1  | 10006  | ABI1      | L |
| 6709 | SPTAN1 | 6853   | SYN1      | L |
| 6709 | SPTAN1 | 7803   | PTP4A1    | L |
| 6709 | SPTAN1 | 8936   | WASF1     | L |

|      |        |        |         |    |
|------|--------|--------|---------|----|
| 6709 | SPTAN1 | 10006  | ABI1    | L  |
| 6709 | SPTAN1 | 10078  | TSSC4   | S  |
| 6709 | SPTAN1 | 50944  | SHANK1  | L  |
| 6709 | SPTAN1 | 53635  | PTOV1   | S  |
| 6709 | SPTAN1 | 57062  | DDX24   | S  |
| 6711 | SPTBN1 | 8904   | CPNE1   | L  |
| 6711 | SPTBN1 | 10121  | ACTR1A  | L  |
| 6711 | SPTBN1 | 55729  | ATF7IP  | L  |
| 6711 | SPTBN1 | 57473  | GM632   | L  |
| 6711 | SPTBN1 | 60561  | RINT-1  | S  |
| 6711 | SPTBN1 | 131034 | CPNE4   | L  |
| 6712 | SPTBN2 | 8936   | WASF1   | L  |
| 6712 | SPTBN2 | 10121  | ACTR1A  | L  |
| 6712 | SPTBN2 | 10497  | UNC13B  | L  |
| 6714 | SRC    | 6722   | SRF     | L  |
| 6714 | SRC    | 6772   | STAT1   | L  |
| 6714 | SRC    | 6774   | STAT3   | L  |
| 6714 | SRC    | 6776   | STAT5A  | L  |
| 6714 | SRC    | 6850   | SYK     | L  |
| 6714 | SRC    | 6853   | SYN1    | L  |
| 6714 | SRC    | 6927   | TCF1    | L  |
| 6714 | SRC    | 7074   | TIAM1   | L  |
| 6714 | SRC    | 7189   | TRAF6   | L  |
| 6714 | SRC    | 7205   | TRIP6   | L  |
| 6714 | SRC    | 7225   | TRPC6   | L  |
| 6714 | SRC    | 7275   | TUB     | L  |
| 6714 | SRC    | 7301   | TYRO3   | L  |
| 6714 | SRC    | 7454   | WAS     | L  |
| 6714 | SRC    | 7529   | YWHAB   | L  |
| 6714 | SRC    | 7531   | YWHAE   | L  |
| 6714 | SRC    | 7532   | YWHAG   | L  |
| 6714 | SRC    | 7533   | YWHAH   | L  |
| 6714 | SRC    | 8038   | ADAM12  | L  |
| 6714 | SRC    | 8631   | SCAP1   | L  |
| 6714 | SRC    | 8751   | ADAM15  | L  |
| 6714 | SRC    | 9019   | MPZL1   | L  |
| 6714 | SRC    | 9644   | SH3MD1  | L  |
| 6714 | SRC    | 9846   | GAB2    | L  |
| 6714 | SRC    | 10399  | GNB2L1  | L  |
| 6714 | SRC    | 10657  | KHDRBS1 | SL |
| 6714 | SRC    | 11099  | PTPN21  | L  |
| 6714 | SRC    | 22920  | KIFAP3  | L  |
| 6714 | SRC    | 23607  | CD2AP   | L  |
| 6714 | SRC    | 23616  | SH3BP1  | L  |
| 6714 | SRC    | 28964  | GIT1    | L  |
| 6714 | SRC    | 50807  | DDEF1   | L  |
| 6714 | SRC    | 51466  | EVL     | L  |
| 6714 | SRC    | 59341  | TRPV4   | L  |
| 6714 | SRC    | 60312  | AFAP    | L  |
| 6714 | SRC    | 91746  | YT521   | L  |
| 6714 | SRC    | 139716 | GAB3    | L  |
| 6717 | SRI    | 10241  | NDP52   | R  |
| 6717 | SRI    | 25801  | GCA     | L  |
| 6720 | SREBF1 | 7329   | UBE2I   | L  |
| 6720 | SREBF1 | 7528   | YY1     | L  |
| 6720 | SREBF1 | 117581 | TWIST2  | L  |
| 6721 | SREBF2 | 7329   | UBE2I   | L  |
| 6721 | SREBF2 | 7341   | SUMO1   | L  |
| 6721 | SREBF2 | 22937  | SCAP    | L  |
| 6721 | SREBF2 | 79434  | (null)  | S  |
| 6722 | SRF    | 6749   | SSRP1   | L  |
| 6722 | SRF    | 7003   | TEAD1   | L  |
| 6722 | SRF    | 8648   | NCOA1   | L  |
| 6722 | SRF    | 9612   | NCOR2   | L  |
| 6722 | SRF    | 29108  | PYCARD  | L  |
| 6722 | SRF    | 57591  | MKL1    | L  |
| 6722 | SRF    | 84525  | HOP     | L  |



|      |        |        |          |   |
|------|--------|--------|----------|---|
| 6722 | SRF    | 93649  | MYOCD    | L |
| 6722 | SRF    | 159296 | NKX2-3   | L |
| 6726 | SRP9   | 6727   | SRP14    | L |
| 6727 | SRP14  | 55968  | NSFL1C   | S |
| 6728 | SRP19  | 6729   | SRP54    | L |
| 6728 | SRP19  | 10526  | IPO8     | L |
| 6728 | SRP19  | 10527  | IPO7     | L |
| 6730 | SRP68  | 6731   | SRP72    | L |
| 6733 | SRPK2  | 11338  | U2AF2    | R |
| 6734 | SRPR   | 6746   | SSR2     | L |
| 6734 | SRPR   | 9853   | RUSC2    | S |
| 6737 | TRIM21 | 7375   | USP4     | L |
| 6737 | TRIM21 | 60491  | NIF3L1   | R |
| 6744 | SSFA2  | 51631  | LUC7L2   | S |
| 6745 | SSR1   | 10813  | UTP14A   | S |
| 6745 | SSR1   | 53371  | NUP54    | L |
| 6747 | SSR3   | 7916   | BAT2     | L |
| 6748 | SSR4   | 23072  | HECW1    | L |
| 6749 | SSRP1  | 26292  | MYCBP    | S |
| 6749 | SSRP1  | 91754  | NEK9     | L |
| 6750 | SST    | 6751   | SSTR1    | L |
| 6750 | SST    | 6752   | SSTR2    | L |
| 6750 | SST    | 6753   | SSTR3    | L |
| 6750 | SST    | 6754   | SSTR4    | L |
| 6750 | SST    | 6755   | SSTR5    | L |
| 6751 | SSTR1  | 6755   | SSTR5    | L |
| 6752 | SSTR2  | 22941  | SHANK2   | L |
| 6752 | SSTR2  | 50944  | SHANK1   | L |
| 6753 | SSTR3  | 7157   | TP53     | L |
| 6755 | SSTR5  | 55811  | SAC      | L |
| 6757 | SSX2   | 117177 | RAB3IP   | L |
| 6757 | SSX2   | 117178 | SSX2IP   | L |
| 6760 | SS18   | 8028   | MLLT10   | L |
| 6767 | ST13   | 9398   | IGSF2    | S |
| 6767 | ST13   | 93145  | OLFM2    | S |
| 6770 | STAR   | 9638   | FEZ1     | S |
| 6770 | STAR   | 54535  | CCHCR1   | L |
| 6772 | STAT1  | 6773   | STAT2    | L |
| 6772 | STAT1  | 6774   | STAT3    | L |
| 6772 | STAT1  | 7132   | TNFRSF1A | L |
| 6772 | STAT1  | 7329   | UBE2I    | L |
| 6772 | STAT1  | 7421   | VDR      | L |
| 6772 | STAT1  | 7514   | XPO1     | L |
| 6772 | STAT1  | 8554   | PIAS1    | L |
| 6772 | STAT1  | 8717   | TRADD    | L |
| 6772 | STAT1  | 9111   | NMI      | L |
| 6772 | STAT1  | 9466   | IL27RA   | L |
| 6772 | STAT1  | 10379  | ISGF3G   | L |
| 6772 | STAT1  | 10399  | GNB2L1   | L |
| 6772 | STAT1  | 84285  | MGC11102 | R |
| 6773 | STAT2  | 9282   | CRSP2    | L |
| 6773 | STAT2  | 10379  | ISGF3G   | L |
| 6774 | STAT3  | 6850   | SYK      | L |
| 6774 | STAT3  | 6927   | TCF1     | L |
| 6774 | STAT3  | 7253   | TSHR     | L |
| 6774 | STAT3  | 8553   | BHLHB2   | L |
| 6774 | STAT3  | 8648   | NCOA1    | L |
| 6774 | STAT3  | 9111   | NMI      | L |
| 6774 | STAT3  | 10401  | PIAS3    | L |
| 6774 | STAT3  | 10524  | HTATIP   | L |
| 6774 | STAT3  | 10657  | KHDRBS1  | L |
| 6774 | STAT3  | 51079  | NDUFA13  | L |
| 6774 | STAT3  | 85480  | TSLP     | L |
| 6775 | STAT4  | 9063   | PIAS2    | L |
| 6775 | STAT4  | 9111   | NMI      | L |
| 6776 | STAT5A | 6777   | STAT5B   | L |
| 6776 | STAT5A | 6850   | SYK      | L |

|      |         |        |               |   |
|------|---------|--------|---------------|---|
| 6776 | STAT5A  | 9111   | NMI           | L |
| 6776 | STAT5A  | 9612   | NCOR2         | L |
| 6776 | STAT5A  | 55835  | CENPJ         | L |
| 6776 | STAT5A  | 56952  | PRTFDC1       | R |
| 6776 | STAT5A  | 85480  | TSLP          | L |
| 6777 | STAT5B  | 9111   | NMI           | L |
| 6777 | STAT5B  | 9612   | NCOR2         | L |
| 6777 | STAT5B  | 55835  | CENPJ         | L |
| 6778 | STAT6   | 8648   | NCOA1         | L |
| 6778 | STAT6   | 9111   | NMI           | L |
| 6778 | STAT6   | 27044  | SND1          | L |
| 6782 | STCH    | 29978  | UBQLN2        | L |
| 6782 | STCH    | 29979  | UBQLN1        | R |
| 6783 | SULT1E1 | 6820   | SULT2B1       | R |
| 6783 | SULT1E1 | 7157   | TP53          | S |
| 6783 | SULT1E1 | 9094   | UNC119        | S |
| 6783 | SULT1E1 | 9869   | SETDB1        | S |
| 6783 | SULT1E1 | 10980  | COPS6         | S |
| 6783 | SULT1E1 | 11161  | C14orf1       | S |
| 6783 | SULT1E1 | 55068  | FLJ10094      | R |
| 6783 | SULT1E1 | 55791  | C1orf103      | S |
| 6783 | SULT1E1 | 84060  | DKFZP564O0523 | S |
| 6783 | SULT1E1 | 84966  | IGSF21        | S |
| 6786 | STIM1   | 57620  | STIM2         | L |
| 6789 | STK4    | 7157   | TP53          | L |
| 6789 | STK4    | 83593  | RASSF5        | L |
| 6790 | STK6    | 6867   | TACC1         | L |
| 6790 | STK6    | 7157   | TP53          | L |
| 6790 | STK6    | 7334   | UBE2N         | L |
| 6790 | STK6    | 9793   | CKAP5         | L |
| 6790 | STK6    | 22974  | TPX2          | L |
| 6790 | STK6    | 51199  | NIN           | L |
| 6790 | STK6    | 53615  | MBD3          | L |
| 6794 | STK11   | 7157   | TP53          | L |
| 6794 | STK11   | 11140  | CDC37         | L |
| 6794 | STK11   | 25843  | PREI3         | S |
| 6794 | STK11   | 114790 | STK11IP       | L |
| 6801 | STRN    | 55729  | ATF7IP        | L |
| 6804 | STX1A   | 6812   | STXBP1        | L |
| 6804 | STX1A   | 6813   | STXBP2        | L |
| 6804 | STX1A   | 6843   | VAMP1         | L |
| 6804 | STX1A   | 6844   | VAMP2         | L |
| 6804 | STX1A   | 6845   | SYBL1         | L |
| 6804 | STX1A   | 6857   | SYT1          | L |
| 6804 | STX1A   | 6860   | SYT4          | L |
| 6804 | STX1A   | 7431   | VIM           | S |
| 6804 | STX1A   | 8673   | VAMP8         | L |
| 6804 | STX1A   | 8773   | SNAP23        | L |
| 6804 | STX1A   | 8775   | NAPA          | L |
| 6804 | STX1A   | 9482   | STX8          | L |
| 6804 | STX1A   | 10497  | UNC13B        | L |
| 6804 | STX1A   | 10814  | CPLX2         | L |
| 6804 | STX1A   | 10815  | CPLX1         | L |
| 6804 | STX1A   | 29091  | STXBP6        | L |
| 6804 | STX1A   | 54462  | KIAA1128      | S |
| 6804 | STX1A   | 94121  | SYTL4         | L |
| 6804 | STX1A   | 134957 | STXBP5        | L |
| 6804 | STX1A   | 167838 | TXLNB         | L |
| 6804 | STX1A   | 200081 | TXLNA         | L |
| 6809 | STX3A   | 7094   | TLN1          | L |
| 6809 | STX3A   | 7414   | VCL           | L |
| 6810 | STX4A   | 6814   | STXBP3        | L |
| 6810 | STX4A   | 6860   | SYT4          | L |
| 6810 | STX4A   | 8673   | VAMP8         | L |
| 6810 | STX4A   | 8674   | VAMP4         | R |
| 6810 | STX4A   | 8766   | RAB11A        | L |
| 6810 | STX4A   | 8773   | SNAP23        | L |

|      |         |        |          |    |
|------|---------|--------|----------|----|
| 6810 | STX4A   | 8775   | NAPA     | R  |
| 6810 | STX4A   | 9341   | VAMP3    | R  |
| 6810 | STX4A   | 29091  | STXBP6   | L  |
| 6810 | STX4A   | 167838 | TXLNB    | L  |
| 6810 | STX4A   | 200081 | TXLNA    | L  |
| 6811 | STX5A   | 7157   | TP53     | S  |
| 6811 | STX5A   | 7917   | BAT3     | S  |
| 6811 | STX5A   | 8615   | VDP      | L  |
| 6811 | STX5A   | 8775   | NAPA     | R  |
| 6811 | STX5A   | 9001   | HAP1     | S  |
| 6811 | STX5A   | 9527   | GOSR1    | L  |
| 6811 | STX5A   | 9554   | SEC22L1  | L  |
| 6811 | STX5A   | 9570   | GOSR2    | L  |
| 6811 | STX5A   | 10980  | COPS6    | S  |
| 6811 | STX5A   | 10989  | IMMT     | S  |
| 6811 | STX5A   | 55791  | C1orf103 | S  |
| 6811 | STX5A   | 55968  | NSFL1C   | L  |
| 6812 | STXBP1  | 8447   | DOC2B    | L  |
| 6812 | STXBP1  | 8448   | DOC2A    | L  |
| 6812 | STXBP1  | 8615   | VDP      | L  |
| 6813 | STXBP2  | 6844   | VAMP2    | L  |
| 6813 | STXBP2  | 8773   | SNAP23   | L  |
| 6820 | SULT2B1 | 130540 | ALS2CR12 | R  |
| 6829 | SUPT5H  | 9372   | ZFYVE9   | L  |
| 6829 | SUPT5H  | 10419  | SKB1     | L  |
| 6829 | SUPT5H  | 27336  | HTATSF1  | L  |
| 6829 | SUPT5H  | 57473  | GM632    | L  |
| 6835 | SURF2   | 8703   | B4GALT3  | S  |
| 6837 | SURF5   | 51280  | GOLPH2   | S  |
| 6839 | SUV39H1 | 10014  | HDAC5    | L  |
| 6839 | SUV39H1 | 10951  | CBX1     | L  |
| 6839 | SUV39H1 | 23468  | CBX5     | RL |
| 6840 | SVIL    | 7041   | TGFB1I1  | L  |
| 6840 | SVIL    | 51631  | LUC7L2   | S  |
| 6843 | VAMP1   | 8773   | SNAP23   | L  |
| 6843 | VAMP1   | 9217   | VAPB     | L  |
| 6843 | VAMP1   | 9218   | VAPA     | L  |
| 6844 | VAMP2   | 7222   | TRPC3    | L  |
| 6844 | VAMP2   | 8673   | VAMP8    | L  |
| 6844 | VAMP2   | 8676   | STX11    | L  |
| 6844 | VAMP2   | 8773   | SNAP23   | L  |
| 6844 | VAMP2   | 9217   | VAPB     | L  |
| 6844 | VAMP2   | 9218   | VAPA     | L  |
| 6844 | VAMP2   | 10567  | RABAC1   | L  |
| 6844 | VAMP2   | 10815  | CPLX1    | L  |
| 6845 | SYBL1   | 8417   | STX7     | L  |
| 6845 | SYBL1   | 8773   | SNAP23   | L  |
| 6845 | SYBL1   | 8943   | AP3D1    | L  |
| 6850 | SYK     | 7189   | TRAF6    | L  |
| 6850 | SYK     | 7314   | UBB      | L  |
| 6850 | SYK     | 7409   | VAV1     | L  |
| 6850 | SYK     | 7430   | VIL2     | L  |
| 6850 | SYK     | 7846   | TUBA3    | L  |
| 6850 | SYK     | 27040  | LAT      | L  |
| 6850 | SYK     | 27240  | SIT1     | L  |
| 6850 | SYK     | 29760  | BLNK     | L  |
| 6850 | SYK     | 55824  | PAG1     | L  |
| 6853 | SYN1    | 7431   | VIM      | S  |
| 6853 | SYN1    | 8224   | SYN3     | L  |
| 6853 | SYN1    | 10524  | HTATIP   | S  |
| 6854 | SYN2    | 8224   | SYN3     | L  |
| 6857 | SYT1    | 6860   | SYT4     | L  |
| 6857 | SYT1    | 9899   | SV2B     | L  |
| 6857 | SYT1    | 10399  | GNB2L1   | L  |
| 6857 | SYT1    | 10492  | SYNCRIP  | L  |
| 6857 | SYT1    | 10815  | CPLX1    | L  |
| 6857 | SYT1    | 51280  | GOLPH2   | S  |

|      |        |        |               |    |
|------|--------|--------|---------------|----|
| 6857 | SYT1   | 85439  | STN2          | L  |
| 6860 | SYT4   | 7021   | TFAP2B        | L  |
| 6860 | SYT4   | 10492  | SYNCRIP       | L  |
| 6861 | SYT5   | 10492  | SYNCRIP       | L  |
| 6861 | SYT5   | 84258  | SYT3          | L  |
| 6863 | TAC1   | 6865   | TACR2         | L  |
| 6863 | TAC1   | 6866   | TAC3          | L  |
| 6863 | TAC1   | 6869   | TACR1         | L  |
| 6863 | TAC1   | 6870   | TACR3         | L  |
| 6863 | TAC1   | 7917   | BAT3          | S  |
| 6863 | TAC1   | 55701  | FLJ10357      | S  |
| 6865 | TACR2  | 6866   | TAC3          | L  |
| 6865 | TACR2  | 255061 | TAC4          | L  |
| 6866 | TAC3   | 6869   | TACR1         | L  |
| 6866 | TAC3   | 6870   | TACR3         | L  |
| 6866 | TAC3   | 8518   | IKBKAP        | S  |
| 6866 | TAC3   | 9638   | FEZ1          | S  |
| 6866 | TAC3   | 9737   | GPRASP1       | S  |
| 6866 | TAC3   | 60492  | MDS025        | S  |
| 6866 | TAC3   | 197131 | UBR1          | S  |
| 6867 | TACC1  | 8089   | YEATS4        | L  |
| 6867 | TACC1  | 9212   | AURKB         | L  |
| 6867 | TACC1  | 51690  | LSM7          | L  |
| 6868 | ADAM17 | 7078   | TIMP3         | L  |
| 6868 | ADAM17 | 10459  | MAD2L2        | L  |
| 6869 | TACR1  | 255061 | TAC4          | L  |
| 6870 | TACR3  | 255061 | TAC4          | L  |
| 6871 | TADA2L | 9146   | HGS           | R  |
| 6871 | TADA2L | 10474  | TADA3L        | RL |
| 6871 | TADA2L | 11170  | TU3A          | R  |
| 6871 | TADA2L | 149371 | EXOC8         | R  |
| 6872 | TAF1   | 6873   | TAF2          | L  |
| 6872 | TAF1   | 6879   | TAF7          | L  |
| 6872 | TAF1   | 6908   | TBP           | L  |
| 6872 | TAF1   | 7157   | TP53          | L  |
| 6872 | TAF1   | 7343   | UBTF          | L  |
| 6872 | TAF1   | 8148   | TAF15         | L  |
| 6872 | TAF1   | 8290   | HIST3H3       | L  |
| 6872 | TAF1   | 8721   | EDF1          | L  |
| 6872 | TAF1   | 10923  | SUB1          | L  |
| 6872 | TAF1   | 25842  | ASF1A         | L  |
| 6874 | TAF4   | 6883   | TAF12         | L  |
| 6874 | TAF4   | 23468  | CBX5          | L  |
| 6879 | TAF7   | 8148   | TAF15         | L  |
| 6879 | TAF7   | 8805   | TRIM24        | L  |
| 6879 | TAF7   | 29894  | CPSF1         | L  |
| 6880 | TAF9   | 10589  | DRAP1         | R  |
| 6880 | TAF9   | 84060  | DKFZP564O0523 | S  |
| 6882 | TAF11  | 6884   | TAF13         | L  |
| 6885 | MAP3K7 | 8204   | NRIP1         | L  |
| 6885 | MAP3K7 | 8792   | TNFRSF11A     | L  |
| 6885 | MAP3K7 | 9020   | MAP3K14       | L  |
| 6885 | MAP3K7 | 9146   | HGS           | L  |
| 6885 | MAP3K7 | 9448   | MAP4K4        | L  |
| 6885 | MAP3K7 | 10454  | MAP3K7IP1     | L  |
| 6885 | MAP3K7 | 10758  | TRAF3IP2      | L  |
| 6885 | MAP3K7 | 11184  | MAP4K1        | L  |
| 6885 | MAP3K7 | 55437  | ALS2CR2       | L  |
| 6886 | TAL1   | 6929   | TCF3          | L  |
| 6886 | TAL1   | 54892  | LUZP5         | L  |
| 6887 | TAL2   | 6929   | TCF3          | L  |
| 6888 | TALDO1 | 51691  | LSM8          | L  |
| 6890 | TAP1   | 83755  | KRTAP4-12     | R  |
| 6892 | TAPBP  | 22820  | COPG          | L  |
| 6892 | TAPBP  | 26958  | COPG2         | L  |
| 6895 | TARBP2 | 9618   | TRAF4         | L  |
| 6895 | TARBP2 | 10432  | RBM14         | L  |

|      |        |        |           |    |
|------|--------|--------|-----------|----|
| 6895 | TARBP2 | 307255 | (null)    | S  |
| 6900 | CNTN2  | 26047  | CNTNAP2   | L  |
| 6904 | TBCD   | 7280   | TUBB2     | L  |
| 6904 | TBCD   | 28955  | DEXI      | S  |
| 6905 | TBCE   | 7277   | TUBA1     | L  |
| 6907 | TBL1X  | 8349   | HIST2H2BE | L  |
| 6907 | TBL1X  | 9611   | NCOR1     | L  |
| 6907 | TBL1X  | 9612   | NCOR2     | L  |
| 6907 | TBL1X  | 27101  | CACYBP    | L  |
| 6908 | TBP    | 7157   | TP53      | L  |
| 6908 | TBP    | 7343   | UBTF      | L  |
| 6908 | TBP    | 8202   | NCOA3     | L  |
| 6908 | TBP    | 8648   | NCOA1     | L  |
| 6908 | TBP    | 8721   | EDF1      | L  |
| 6908 | TBP    | 8804   | CREG1     | L  |
| 6908 | TBP    | 9013   | TAF1C     | L  |
| 6908 | TBP    | 9014   | TAF1B     | L  |
| 6908 | TBP    | 9015   | TAF1A     | L  |
| 6908 | TBP    | 9044   | BTAF1     | L  |
| 6908 | TBP    | 9325   | TRIP4     | L  |
| 6908 | TBP    | 10320  | ZNFN1A1   | L  |
| 6908 | TBP    | 10589  | DRAP1     | L  |
| 6908 | TBP    | 10923  | SUB1      | L  |
| 6908 | TBP    | 54457  | TAF7L     | L  |
| 6908 | TBP    | 55290  | BRF2      | L  |
| 6908 | TBP    | 138474 | TAF1L     | L  |
| 6908 | TBP    | 284403 | WDR62     | S  |
| 6915 | TBXA2R | 10672  | GNA13     | L  |
| 6917 | TCEA1  | 9150   | CTDP1     | L  |
| 6919 | TCEA2  | 7186   | TRAF2     | R  |
| 6919 | TCEA2  | 22911  | WDR47     | S  |
| 6919 | TCEA2  | 30851  | TAX1BP3   | S  |
| 6919 | TCEA2  | 54462  | KIAA1128  | S  |
| 6919 | TCEA2  | 79012  | CAMKV     | S  |
| 6919 | TCEA2  | 80152  | FLJ13111  | S  |
| 6919 | TCEA2  | 84335  | AKT1S1    | S  |
| 6919 | TCEA2  | 85302  | FBF1      | S  |
| 6921 | TCEB1  | 6923   | TCEB2     | RL |
| 6921 | TCEB1  | 7428   | VHL       | L  |
| 6921 | TCEB1  | 9021   | SOCS3     | L  |
| 6921 | TCEB1  | 9306   | SOCS6     | L  |
| 6921 | TCEB1  | 10489  | LRRC41    | L  |
| 6921 | TCEB1  | 23032  | USP33     | L  |
| 6921 | TCEB1  | 140461 | ASB8      | L  |
| 6923 | TCEB2  | 7428   | VHL       | L  |
| 6923 | TCEB2  | 9021   | SOCS3     | L  |
| 6923 | TCEB2  | 9306   | SOCS6     | L  |
| 6923 | TCEB2  | 10489  | LRRC41    | L  |
| 6923 | TCEB2  | 23032  | USP33     | L  |
| 6923 | TCEB2  | 140461 | ASB8      | L  |
| 6924 | TCEB3  | 22981  | KIAA0980  | R  |
| 6925 | TCF4   | 6929   | TCF3      | L  |
| 6925 | TCF4   | 9242   | MSC       | L  |
| 6927 | TCF1   | 6928   | TCF2      | L  |
| 6927 | TCF1   | 7088   | TLE1      | L  |
| 6927 | TCF1   | 8850   | PCAF      | L  |
| 6929 | TCF3   | 6938   | TCF12     | L  |
| 6929 | TCF3   | 7291   | TWIST1    | L  |
| 6929 | TCF3   | 7867   | MAPKAPK3  | L  |
| 6929 | TCF3   | 8850   | PCAF      | L  |
| 6929 | TCF3   | 9242   | MSC       | L  |
| 6929 | TCF3   | 9421   | HAND1     | L  |
| 6929 | TCF3   | 9464   | HAND2     | L  |
| 6929 | TCF3   | 29844  | TFPT      | L  |
| 6929 | TCF3   | 256297 | PTF1A     | L  |
| 6935 | TCF8   | 10524  | HTATIP    | L  |
| 6935 | TCF8   | 10589  | DRAP1     | L  |

|      |         |        |           |    |
|------|---------|--------|-----------|----|
| 6936 | C2orf3  | 7094   | TLN1      | L  |
| 6938 | TCF12   | 6943   | TCF21     | L  |
| 6938 | TCF12   | 9242   | MSC       | L  |
| 6938 | TCF12   | 9421   | HAND1     | L  |
| 6938 | TCF12   | 11098  | PRSS23    | S  |
| 6938 | TCF12   | 256297 | PTF1A     | L  |
| 6940 | ZNF354A | 8655   | DNCL1     | L  |
| 6943 | TCF21   | 8543   | LMO4      | L  |
| 6944 | VPS72   | 10241  | NDP52     | R  |
| 6944 | VPS72   | 11007  | DIPA      | R  |
| 6945 | MLX     | 11345  | GABARAPL2 | R  |
| 6950 | TCP1    | 51807  | TUBA8     | L  |
| 6955 | TRA@    | 6964   | TRD@      | L  |
| 6955 | TRA@    | 28639  | TRBC1     | L  |
| 6955 | TRA@    | 50852  | TRAT1     | L  |
| 6955 | TRA@    | 51176  | LEF1      | L  |
| 6990 | TCTE1L  | 7416   | VDAC1     | L  |
| 6990 | TCTE1L  | 54997  | TSC       | R  |
| 6993 | TCTEL1  | 7416   | VDAC1     | L  |
| 6996 | TDG     | 7067   | THRA      | L  |
| 6996 | TDG     | 7341   | SUMO1     | L  |
| 6996 | TDG     | 7421   | VDR       | L  |
| 6996 | TDG     | 7508   | XPC       | L  |
| 6996 | TDG     | 7919   | BAT1      | L  |
| 6997 | TDGF1   | 7917   | BAT3      | S  |
| 6997 | TDGF1   | 10980  | COPS6     | S  |
| 6997 | TDGF1   | 55791  | C1orf103  | S  |
| 6997 | TDGF1   | 130399 | ACVR1C    | L  |
| 6999 | TDO2    | 8623   | ASMTL     | R  |
| 7003 | TEAD1   | 9686   | VGLL4     | L  |
| 7003 | TEAD1   | 10413  | YAP1      | L  |
| 7003 | TEAD1   | 51442  | VGLL1     | L  |
| 7004 | TEAD4   | 10413  | YAP1      | L  |
| 7004 | TEAD4   | 11007  | DIPA      | R  |
| 7004 | TEAD4   | 25937  | WWTR1     | R  |
| 7004 | TEAD4   | 51442  | VGLL1     | L  |
| 7005 | TEAD3   | 10413  | YAP1      | L  |
| 7005 | TEAD3   | 25937  | WWTR1     | R  |
| 7005 | TEAD3   | 51442  | VGLL1     | L  |
| 7006 | TEC     | 7409   | VAV1      | L  |
| 7006 | TEC     | 7454   | WAS       | L  |
| 7006 | TEC     | 8503   | PIK3R3    | L  |
| 7006 | TEC     | 8651   | SOCS1     | L  |
| 7006 | TEC     | 10733  | PLK4      | L  |
| 7006 | TEC     | 11099  | PTPN21    | L  |
| 7008 | TEF     | 10538  | BATF      | L  |
| 7008 | TEF     | 55509  | SNFT      | L  |
| 7010 | TEK     | 7075   | TIE1      | L  |
| 7010 | TEK     | 8651   | SOCS1     | L  |
| 7010 | TEK     | 9046   | DOK2      | L  |
| 7010 | TEK     | 9068   | ANGPTL1   | L  |
| 7010 | TEK     | 51378  | ANGPT4    | L  |
| 7011 | TEP1    | 7015   | TERT      | L  |
| 7011 | TEP1    | 7157   | TP53      | L  |
| 7013 | TERF1   | 7704   | ZBTB16    | S  |
| 7013 | TERF1   | 8658   | TNKS      | L  |
| 7013 | TERF1   | 9231   | DLG5      | S  |
| 7013 | TERF1   | 10813  | UTP14A    | S  |
| 7013 | TERF1   | 11244  | ZHX1      | S  |
| 7013 | TERF1   | 22919  | MAPRE1    | L  |
| 7013 | TERF1   | 25913  | POT1      | L  |
| 7013 | TERF1   | 26277  | TINF2     | SL |
| 7013 | TERF1   | 28964  | GIT1      | S  |
| 7013 | TERF1   | 54984  | PINX1     | L  |
| 7013 | TERF1   | 60626  | RIC8A     | S  |
| 7013 | TERF1   | 80351  | TNKS2     | L  |
| 7014 | TERF2   | 7486   | WRN       | L  |

|      |         |        |           |   |
|------|---------|--------|-----------|---|
| 7014 | TERF2   | 10111  | RAD50     | L |
| 7014 | TERF2   | 54386  | TERF2IP   | L |
| 7015 | TERT    | 7514   | XPO1      | L |
| 7015 | TERT    | 7520   | XRCC5     | L |
| 7015 | TERT    | 10445  | MCRS1     | L |
| 7015 | TERT    | 10519  | CIB1      | L |
| 7015 | TERT    | 10971  | YWHAQ     | L |
| 7015 | TERT    | 23293  | C17orf31  | L |
| 7015 | TERT    | 54984  | PINX1     | L |
| 7016 | TESK1   | 7529   | YWHAB     | L |
| 7016 | TESK1   | 81848  | SPRY4     | L |
| 7018 | TF      | 7036   | TFR2      | L |
| 7018 | TF      | 7037   | TFRC      | L |
| 7018 | TF      | 8029   | CUBN      | L |
| 7018 | TF      | 10381  | TUBB3     | S |
| 7019 | TFAM    | 51106  | TFB1M     | L |
| 7020 | TFAP2A  | 7157   | TP53      | L |
| 7020 | TFAP2A  | 7913   | DEK       | L |
| 7020 | TFAP2A  | 10370  | CITED2    | L |
| 7020 | TFAP2A  | 26119  | LDLRAP1   | L |
| 7020 | TFAP2A  | 163732 | CITED4    | L |
| 7021 | TFAP2B  | 8334   | HIST1H2AC | S |
| 7021 | TFAP2B  | 55823  | VPS11     | S |
| 7021 | TFAP2B  | 163732 | CITED4    | L |
| 7022 | TFAP2C  | 7157   | TP53      | L |
| 7022 | TFAP2C  | 10370  | CITED2    | L |
| 7022 | TFAP2C  | 163732 | CITED4    | L |
| 7025 | NR2F1   | 7067   | THRA      | L |
| 7025 | NR2F1   | 8648   | NCOA1     | L |
| 7025 | NR2F1   | 53335  | BCL11A    | L |
| 7025 | NR2F1   | 64919  | BCL11B    | L |
| 7026 | NR2F2   | 8805   | TRIM24    | L |
| 7026 | NR2F2   | 8878   | SQSTM1    | L |
| 7026 | NR2F2   | 10114  | HIPK3     | L |
| 7026 | NR2F2   | 53335  | BCL11A    | L |
| 7026 | NR2F2   | 55603  | FAM46A    | L |
| 7026 | NR2F2   | 64919  | BCL11B    | L |
| 7027 | TFDP1   | 7157   | TP53      | L |
| 7030 | TFE3    | 7942   | TFEB      | L |
| 7030 | TFE3    | 22797  | TFEC      | L |
| 7031 | TFF1    | 29979  | UBQLN1    | R |
| 7035 | TFPI    | 7057   | THBS1     | L |
| 7037 | TFRC    | 7094   | TLN1      | L |
| 7037 | TFRC    | 7414   | VCL       | L |
| 7037 | TFRC    | 11337  | GABARAP   | L |
| 7037 | TFRC    | 148738 | HFE2      | L |
| 7040 | TGFB1   | 7042   | TGFB2     | L |
| 7040 | TGFB1   | 7046   | TGFBR1    | L |
| 7040 | TGFB1   | 7048   | TGFBR2    | L |
| 7040 | TGFB1   | 7049   | TGFBR3    | L |
| 7040 | TGFB1   | 7057   | THBS1     | L |
| 7040 | TGFB1   | 7448   | VTN       | L |
| 7040 | TGFB1   | 7531   | YWHAE     | L |
| 7040 | TGFB1   | 8425   | LTBP4     | L |
| 7040 | TGFB1   | 8668   | EIF3S2    | L |
| 7040 | TGFB1   | 114990 | SLITL2    | L |
| 7041 | TGFB111 | 7048   | TGFBR2    | L |
| 7041 | TGFB111 | 9618   | TRAF4     | L |
| 7041 | TGFB111 | 10114  | HIPK3     | L |
| 7041 | TGFB111 | 28964  | GIT1      | L |
| 7042 | TGFB2   | 7043   | TGFB3     | L |
| 7042 | TGFB2   | 7046   | TGFBR1    | L |
| 7042 | TGFB2   | 7048   | TGFBR2    | L |
| 7042 | TGFB2   | 7049   | TGFBR3    | L |
| 7042 | TGFB2   | 7448   | VTN       | L |
| 7042 | TGFB2   | 114990 | SLITL2    | L |
| 7043 | TGFB3   | 7046   | TGFBR1    | L |

|      |        |        |           |   |
|------|--------|--------|-----------|---|
| 7043 | TGFB3  | 7048   | TGFBR2    | L |
| 7043 | TGFB3  | 7049   | TGFBR3    | L |
| 7043 | TGFB3  | 114990 | SLITL2    | L |
| 7046 | TGFBR1 | 7049   | TGFBR3    | L |
| 7046 | TGFBR1 | 9372   | ZFYVE9    | L |
| 7046 | TGFBR1 | 9392   | TGFBRAP1  | L |
| 7046 | TGFBR1 | 11171  | STRAP     | L |
| 7046 | TGFBR1 | 51776  | ZAK       | L |
| 7046 | TGFBR1 | 64750  | SMURF2    | L |
| 7048 | TGFBR2 | 7049   | TGFBR3    | L |
| 7048 | TGFBR2 | 8668   | EIF3S2    | L |
| 7048 | TGFBR2 | 9133   | CCNB2     | L |
| 7048 | TGFBR2 | 9372   | ZFYVE9    | L |
| 7048 | TGFBR2 | 9392   | TGFBRAP1  | L |
| 7048 | TGFBR2 | 11171  | STRAP     | L |
| 7049 | TGFBR3 | 10755  | GIPC1     | L |
| 7050 | TGIF   | 51003  | MED31     | S |
| 7050 | TGIF   | 55791  | C1orf103  | S |
| 7052 | TGM2   | 7280   | TUBB2     | L |
| 7052 | TGM2   | 8349   | HIST2H2BE | L |
| 7052 | TGM2   | 51535  | PPHLN1    | L |
| 7052 | TGM2   | 57473  | GM632     | L |
| 7053 | TGM3   | 51806  | CALML5    | L |
| 7057 | THBS1  | 11151  | CORO1A    | L |
| 7058 | THBS2  | 7059   | THBS3     | L |
| 7064 | THOP1  | 10200  | MPHOSPH6  | L |
| 7064 | THOP1  | 51678  | MPP6      | L |
| 7067 | THRA   | 7533   | YWHAH     | L |
| 7067 | THRA   | 8638   | OASL      | L |
| 7067 | THRA   | 8648   | NCOA1     | L |
| 7067 | THRA   | 9318   | COPS2     | L |
| 7067 | THRA   | 9412   | SURB7     | L |
| 7067 | THRA   | 9612   | NCOR2     | L |
| 7067 | THRA   | 11214  | AKAP13    | L |
| 7067 | THRA   | 64324  | NSD1      | L |
| 7068 | THRB   | 7157   | TP53      | L |
| 7068 | THRB   | 7205   | TRIP6     | L |
| 7068 | THRB   | 8125   | ANP32A    | L |
| 7068 | THRB   | 8202   | NCOA3     | L |
| 7068 | THRB   | 8648   | NCOA1     | L |
| 7068 | THRB   | 8841   | HDAC3     | L |
| 7068 | THRB   | 9318   | COPS2     | L |
| 7068 | THRB   | 9319   | TRIP13    | L |
| 7068 | THRB   | 9320   | TRIP12    | L |
| 7068 | THRB   | 9322   | TRIP10    | L |
| 7068 | THRB   | 9325   | TRIP4     | L |
| 7068 | THRB   | 9326   | ZNHIT3    | L |
| 7068 | THRB   | 9412   | SURB7     | L |
| 7068 | THRB   | 9612   | NCOR2     | L |
| 7068 | THRB   | 10499  | NCOA2     | L |
| 7068 | THRB   | 10664  | CTCF      | L |
| 7068 | THRB   | 10891  | PPARGC1A  | L |
| 7068 | THRB   | 10902  | BRD8      | L |
| 7068 | THRB   | 29982  | NRBF2     | L |
| 7068 | THRB   | 221037 | JMJD1C    | L |
| 7071 | KLF10  | 57473  | GM632     | L |
| 7072 | TIA1   | 10922  | FASTK     | L |
| 7074 | TIAM1  | 9479   | MAPK8IP1  | L |
| 7074 | TIAM1  | 23542  | MAPK8IP2  | L |
| 7074 | TIAM1  | 84687  | PPP1R9B   | L |
| 7076 | TIMP1  | 9400   | RECQL5    | S |
| 7076 | TIMP1  | 222019 | (null)    | S |
| 7080 | TITF1  | 7849   | PAX8      | L |
| 7080 | TITF1  | 8648   | NCOA1     | L |
| 7080 | TITF1  | 10499  | NCOA2     | L |
| 7080 | TITF1  | 28996  | HIPK2     | L |
| 7082 | TJP1   | 7122   | CLDN5     | L |



|      |      |       |               |   |
|------|------|-------|---------------|---|
| 7082 | TJP1 | 9075  | CLDN2         | L |
| 7082 | TJP1 | 9076  | CLDN1         | L |
| 7082 | TJP1 | 9414  | TJP2          | L |
| 7082 | TJP1 | 10052 | GJA7          | L |
| 7082 | TJP1 | 55243 | KIRREL        | L |
| 7082 | TJP1 | 57530 | CGN           | L |
| 7082 | TJP1 | 58494 | JAM2          | L |
| 7082 | TJP1 | 83700 | JAM3          | L |
| 7083 | TK1  | 7088  | TLE1          | S |
| 7083 | TK1  | 7157  | TP53          | S |
| 7083 | TK1  | 7280  | TUBB2         | S |
| 7083 | TK1  | 9094  | UNC119        | S |
| 7083 | TK1  | 9869  | SETDB1        | S |
| 7083 | TK1  | 10589 | DRAP1         | S |
| 7083 | TK1  | 10980 | COPS6         | S |
| 7083 | TK1  | 11161 | C14orf1       | S |
| 7083 | TK1  | 55791 | C1orf103      | S |
| 7083 | TK1  | 60492 | MDS025        | S |
| 7083 | TK1  | 84060 | DKFZP564O0523 | S |
| 7088 | TLE1 | 7089  | TLE2          | L |
| 7088 | TLE1 | 7403  | UTX           | L |
| 7088 | TLE1 | 7404  | UTY           | L |
| 7088 | TLE1 | 8880  | FUBP1         | S |
| 7088 | TLE1 | 8894  | EIF2S2        | S |
| 7088 | TLE1 | 9802  | DAZAP2        | S |
| 7088 | TLE1 | 9921  | RNF10         | S |
| 7088 | TLE1 | 10200 | MPHOSPH6      | S |
| 7088 | TLE1 | 10301 | DLEU1         | S |
| 7088 | TLE1 | 10736 | SIX2          | L |
| 7088 | TLE1 | 11189 | TNRC4         | S |
| 7088 | TLE1 | 19241 | (null)        | S |
| 7088 | TLE1 | 51176 | LEF1          | L |
| 7088 | TLE1 | 51804 | SIX4          | L |
| 7088 | TLE1 | 53826 | FXYD6         | S |
| 7088 | TLE1 | 54544 | C1orf42       | S |
| 7088 | TLE1 | 55502 | HES6          | L |
| 7088 | TLE1 | 55643 | BTBD2         | S |
| 7088 | TLE1 | 55734 | ZFP64         | S |
| 7088 | TLE1 | 56144 | PCDHA4        | S |
| 7089 | TLE2 | 7404  | UTY           | L |
| 7090 | TLE3 | 51804 | SIX4          | L |
| 7094 | TLN1 | 7172  | TPMT          | L |
| 7094 | TLN1 | 7414  | VCL           | L |
| 7094 | TLN1 | 7431  | VIM           | L |
| 7094 | TLN1 | 9349  | RPL23         | L |
| 7094 | TLN1 | 9774  | BCLAF1        | L |
| 7094 | TLN1 | 9898  | UBAP2L        | L |
| 7094 | TLN1 | 9908  | G3BP2         | L |
| 7094 | TLN1 | 10146 | G3BP          | L |
| 7094 | TLN1 | 10276 | NET1          | L |
| 7094 | TLN1 | 10363 | HMG20A        | L |
| 7094 | TLN1 | 10399 | GNB2L1        | L |
| 7094 | TLN1 | 10409 | BASP1         | L |
| 7094 | TLN1 | 10493 | VAT1          | L |
| 7094 | TLN1 | 10565 | ARFGEF1       | L |
| 7094 | TLN1 | 10657 | KHDRBS1       | L |
| 7094 | TLN1 | 10863 | ADAM28        | L |
| 7094 | TLN1 | 22844 | FRMPD1        | L |
| 7094 | TLN1 | 23066 | CAND2         | L |
| 7094 | TLN1 | 23116 | KIAA0423      | L |
| 7094 | TLN1 | 23231 | KIAA0746      | L |
| 7094 | TLN1 | 23256 | SCFD1         | L |
| 7094 | TLN1 | 23332 | CLASP1        | L |
| 7094 | TLN1 | 26136 | TES           | L |
| 7094 | TLN1 | 26960 | NBEA          | L |
| 7094 | TLN1 | 26986 | PABPC1        | L |
| 7094 | TLN1 | 51493 | HSPC117       | L |

|      |          |        |                 |   |
|------|----------|--------|-----------------|---|
| 7094 | TLN1     | 51663  | ZFR             | L |
| 7094 | TLN1     | 54931  | RG9MTD1         | L |
| 7094 | TLN1     | 55901  | THSD1           | L |
| 7094 | TLN1     | 57099  | AVEN            | L |
| 7094 | TLN1     | 64754  | SMYD3           | L |
| 7094 | TLN1     | 80079  | FLJ13769        | L |
| 7094 | TLN1     | 114991 | ZNF618          | L |
| 7094 | TLN1     | 220885 | LAMR1P15        | L |
| 7094 | TLN1     | 284058 | LOC284058       | L |
| 7095 | TLOC1    | 11231  | SEC63           | L |
| 7096 | TLR1     | 7097   | TLR2            | L |
| 7096 | TLR1     | 7099   | TLR4            | L |
| 7097 | TLR2     | 7184   | TRA1            | L |
| 7097 | TLR2     | 10333  | TLR6            | L |
| 7097 | TLR2     | 23643  | LY96            | L |
| 7097 | TLR2     | 54472  | TOLLIP          | L |
| 7099 | TLR4     | 7184   | TRA1            | L |
| 7099 | TLR4     | 23643  | LY96            | L |
| 7099 | TLR4     | 54472  | TOLLIP          | L |
| 7099 | TLR4     | 114609 | TIRAP           | L |
| 7102 | TSPAN7   | 84248  | FYTTD1          | S |
| 7105 | TSPAN6   | 55791  | C1orf103        | S |
| 7112 | TMPO     | 8815   | BANF1           | L |
| 7112 | TMPO     | 26993  | AKAP8L          | L |
| 7122 | CLDN5    | 8777   | MPDZ            | L |
| 7124 | TNF      | 7132   | TNFRSF1A        | L |
| 7124 | TNF      | 7133   | TNFRSF1B        | L |
| 7128 | TNFAIP3  | 7185   | TRAF1           | L |
| 7128 | TNFAIP3  | 7186   | TRAF2           | L |
| 7128 | TNFAIP3  | 7189   | TRAF6           | L |
| 7128 | TNFAIP3  | 7529   | YWHAB           | L |
| 7128 | TNFAIP3  | 7531   | YWHAE           | L |
| 7128 | TNFAIP3  | 7532   | YWHAG           | L |
| 7128 | TNFAIP3  | 7533   | YWHAH           | L |
| 7128 | TNFAIP3  | 7534   | YWHAZ           | L |
| 7128 | TNFAIP3  | 7805   | LAPTM5          | L |
| 7128 | TNFAIP3  | 8517   | IKBKG           | L |
| 7128 | TNFAIP3  | 8737   | RIPK1           | L |
| 7128 | TNFAIP3  | 8887   | TAX1BP1         | L |
| 7128 | TNFAIP3  | 10318  | TNIP1           | L |
| 7128 | TNFAIP3  | 26994  | RNF11           | L |
| 7128 | TNFAIP3  | 79155  | TNIP2           | L |
| 7132 | TNFRSF1A | 7185   | TRAF1           | L |
| 7132 | TNFRSF1A | 7186   | TRAF2           | L |
| 7132 | TNFRSF1A | 7329   | UBE2I           | L |
| 7132 | TNFRSF1A | 7341   | SUMO1           | L |
| 7132 | TNFRSF1A | 8396   | PIP5K2B         | L |
| 7132 | TNFRSF1A | 8439   | NSMAF           | L |
| 7132 | TNFRSF1A | 8517   | IKBKG           | L |
| 7132 | TNFRSF1A | 8567   | MADD            | L |
| 7132 | TNFRSF1A | 8717   | TRADD           | L |
| 7132 | TNFRSF1A | 8737   | RIPK1           | L |
| 7132 | TNFRSF1A | 8767   | RIPK2           | L |
| 7132 | TNFRSF1A | 9530   | BAG4            | L |
| 7132 | TNFRSF1A | 10131  | TRAP1           | L |
| 7132 | TNFRSF1A | 10399  | GNB2L1          | L |
| 7132 | TNFRSF1A | 11035  | RIPK3           | L |
| 7132 | TNFRSF1A | 26133  | TRPC4AP         | L |
| 7132 | TNFRSF1A | 407977 | TNFSF12-TNFSF13 | L |
| 7133 | TNFRSF1B | 7185   | TRAF1           | L |
| 7133 | TNFRSF1B | 7186   | TRAF2           | L |
| 7133 | TNFRSF1B | 10293  | TRIP            | L |
| 7133 | TNFRSF1B | 51567  | TTRAP           | L |
| 7133 | TNFRSF1B | 59269  | HIVEP3          | L |
| 7134 | TNNC1    | 7137   | TNNI3           | L |
| 7134 | TNNC1    | 7139   | TNNT2           | L |
| 7135 | TNNI1    | 11007  | DIPA            | R |

|      |       |        |          |   |
|------|-------|--------|----------|---|
| 7137 | TNNI3 | 7138   | TNNT1    | L |
| 7137 | TNNI3 | 7139   | TNNT2    | L |
| 7138 | TNNT1 | 8500   | PPFIA1   | R |
| 7138 | TNNT1 | 9240   | PNMA1    | S |
| 7138 | TNNT1 | 9513   | FXR2     | R |
| 7138 | TNNT1 | 11007  | DIPA     | R |
| 7138 | TNNT1 | 22981  | KIAA0980 | R |
| 7138 | TNNT1 | 79156  | PLEKHF1  | R |
| 7138 | TNNT1 | 116225 | ZMYND19  | R |
| 7140 | TNNT3 | 9001   | HAP1     | S |
| 7140 | TNNT3 | 10073  | RNUT1    | S |
| 7143 | TNR   | 63827  | BCAN     | L |
| 7150 | TOP1  | 7157   | TP53     | L |
| 7150 | TOP1  | 7329   | UBE2I    | L |
| 7150 | TOP1  | 7341   | SUMO1    | L |
| 7150 | TOP1  | 9295   | SFRS11   | L |
| 7150 | TOP1  | 10210  | TOPORS   | L |
| 7150 | TOP1  | 55775  | TDP1     | L |
| 7153 | TOP2A | 7155   | TOP2B    | L |
| 7153 | TOP2A | 7157   | TP53     | L |
| 7153 | TOP2A | 7341   | SUMO1    | L |
| 7153 | TOP2A | 7514   | XPO1     | L |
| 7153 | TOP2A | 7531   | YWHAE    | L |
| 7155 | TOP2B | 7157   | TP53     | L |
| 7155 | TOP2B | 7341   | SUMO1    | L |
| 7155 | TOP2B | 7514   | XPO1     | L |
| 7155 | TOP2B | 11073  | TOPBP1   | L |
| 7156 | TOP3A | 9400   | RECQL5   | L |
| 7157 | TP53  | 7158   | TP53BP1  | L |
| 7157 | TP53  | 7159   | TP53BP2  | L |
| 7157 | TP53  | 7251   | TSG101   | L |
| 7157 | TP53  | 7319   | UBE2A    | L |
| 7157 | TP53  | 7329   | UBE2I    | L |
| 7157 | TP53  | 7337   | UBE3A    | L |
| 7157 | TP53  | 7341   | SUMO1    | L |
| 7157 | TP53  | 7486   | WRN      | L |
| 7157 | TP53  | 7490   | WT1      | L |
| 7157 | TP53  | 7534   | YWHAZ    | L |
| 7157 | TP53  | 7572   | ZNF24    | S |
| 7157 | TP53  | 7707   | ZNF148   | L |
| 7157 | TP53  | 7874   | USP7     | L |
| 7157 | TP53  | 8178   | ELL      | L |
| 7157 | TP53  | 8554   | PIAS1    | L |
| 7157 | TP53  | 8555   | CDC14B   | L |
| 7157 | TP53  | 8556   | CDC14A   | L |
| 7157 | TP53  | 8575   | PRKRA    | L |
| 7157 | TP53  | 8894   | EIF2S2   | S |
| 7157 | TP53  | 9013   | TAF1C    | L |
| 7157 | TP53  | 9014   | TAF1B    | L |
| 7157 | TP53  | 9015   | TAF1A    | L |
| 7157 | TP53  | 9112   | MTA1     | L |
| 7157 | TP53  | 9232   | PTTG1    | L |
| 7157 | TP53  | 9314   | KLF4     | L |
| 7157 | TP53  | 9440   | CRSP6    | L |
| 7157 | TP53  | 9587   | MAD2L1BP | S |
| 7157 | TP53  | 9808   | KIAA0087 | S |
| 7157 | TP53  | 10063  | COX17    | S |
| 7157 | TP53  | 10153  | CEBPZ    | L |
| 7157 | TP53  | 10200  | MPHOSPH6 | S |
| 7157 | TP53  | 10210  | TOPORS   | L |
| 7157 | TP53  | 10301  | DLEU1    | S |
| 7157 | TP53  | 10425  | ARIH2    | S |
| 7157 | TP53  | 10474  | TADA3L   | L |
| 7157 | TP53  | 10571  | SMA3     | S |
| 7157 | TP53  | 10848  | PPP1R13L | L |
| 7157 | TP53  | 19241  | (null)   | S |
| 7157 | TP53  | 23113  | PARC     | L |

|      |         |        |          |   |
|------|---------|--------|----------|---|
| 7157 | TP53    | 23411  | SIRT1    | L |
| 7157 | TP53    | 25898  | RCHY1    | L |
| 7157 | TP53    | 25942  | SIN3A    | L |
| 7157 | TP53    | 26354  | GNL3     | L |
| 7157 | TP53    | 28996  | HIPK2    | L |
| 7157 | TP53    | 29903  | HSU79303 | S |
| 7157 | TP53    | 30008  | EFEMP2   | L |
| 7157 | TP53    | 50484  | RRM2B    | L |
| 7157 | TP53    | 51147  | ING4     | L |
| 7157 | TP53    | 51246  | SCOTIN   | L |
| 7157 | TP53    | 51741  | WVOX     | L |
| 7157 | TP53    | 54819  | ZCCHC10  | S |
| 7157 | TP53    | 55339  | WDR33    | S |
| 7157 | TP53    | 55643  | BTBD2    | S |
| 7157 | TP53    | 56144  | PCDHA4   | S |
| 7157 | TP53    | 64326  | RFWD2    | L |
| 7157 | TP53    | 65990  | C16orf24 | S |
| 7157 | TP53    | 84289  | ING5     | L |
| 7157 | TP53    | 94241  | TP53INP1 | L |
| 7157 | TP53    | 199745 | THAP8    | S |
| 7157 | TP53    | 204851 | HIPK1    | L |
| 7157 | TP53    | 286514 | MAGEB18  | R |
| 7158 | TP53BP1 | 22059  | (null)   | S |
| 7159 | TP53BP2 | 7375   | USP4     | S |
| 7159 | TP53BP2 | 8883   | APPBP1   | L |
| 7159 | TP53BP2 | 9094   | UNC119   | S |
| 7159 | TP53BP2 | 10413  | YAP1     | L |
| 7159 | TP53BP2 | 10813  | UTP14A   | S |
| 7159 | TP53BP2 | 55052  | MRPL20   | S |
| 7161 | TP73    | 10153  | CEBPZ    | L |
| 7161 | TP73    | 10260  | MYCPBP   | L |
| 7161 | TP73    | 10399  | GNB2L1   | L |
| 7161 | TP73    | 10413  | YAP1     | L |
| 7161 | TP73    | 28996  | HIPK2    | L |
| 7162 | TPBG    | 10755  | GIPC1    | L |
| 7163 | TPD52   | 7164   | TPD52L1  | L |
| 7163 | TPD52   | 114569 | MAL2     | L |
| 7164 | TPD52L1 | 7529   | YWHAB    | L |
| 7164 | TPD52L1 | 7534   | YWHAZ    | L |
| 7164 | TPD52L1 | 8669   | EIF3S1   | S |
| 7164 | TPD52L1 | 57002  | C7orf36  | S |
| 7164 | TPD52L1 | 64582  | GPR135   | S |
| 7164 | TPD52L1 | 114569 | MAL2     | L |
| 7166 | TPH1    | 7533   | YWHAH    | L |
| 7166 | TPH1    | 7534   | YWHAZ    | L |
| 7167 | TPI1    | 9869   | SETDB1   | S |
| 7167 | TPI1    | 51601  | LIPT1    | S |
| 7167 | TPI1    | 57062  | DDX24    | S |
| 7168 | TPM1    | 7169   | TPM2     | L |
| 7168 | TPM1    | 79036  | MGC2749  | R |
| 7169 | TPM2    | 9260   | PDLIM7   | L |
| 7170 | TPM3    | 29844  | TFPT     | R |
| 7170 | TPM3    | 79036  | MGC2749  | R |
| 7171 | TPM4    | 7205   | TRIP6    | L |
| 7171 | TPM4    | 10915  | TCERG1   | L |
| 7175 | TPR     | 9972   | NUP153   | L |
| 7181 | NR2C1   | 7182   | NR2C2    | L |
| 7181 | NR2C1   | 8204   | NRIP1    | L |
| 7181 | NR2C1   | 8841   | HDAC3    | L |
| 7181 | NR2C1   | 9759   | HDAC4    | L |
| 7182 | NR2C2   | 257397 | TAB3     | L |
| 7185 | TRAF1   | 7186   | TRAF2    | L |
| 7185 | TRAF1   | 7874   | USP7     | L |
| 7185 | TRAF1   | 8717   | TRADD    | L |
| 7185 | TRAF1   | 8737   | RIPK1    | L |
| 7185 | TRAF1   | 8744   | TNFSF9   | L |
| 7185 | TRAF1   | 8764   | TNFRSF14 | L |

|      |       |       |           |   |
|------|-------|-------|-----------|---|
| 7185 | TRAF1 | 8767  | RIPK2     | L |
| 7185 | TRAF1 | 8784  | TNFRSF18  | L |
| 7185 | TRAF1 | 8792  | TNFRSF11A | L |
| 7185 | TRAF1 | 8837  | CFLAR     | L |
| 7185 | TRAF1 | 9020  | MAP3K14   | L |
| 7185 | TRAF1 | 10010 | TANK      | L |
| 7185 | TRAF1 | 10293 | TRIP      | L |
| 7185 | TRAF1 | 51330 | TNFRSF12A | L |
| 7185 | TRAF1 | 55504 | TNFRSF19  | L |
| 7185 | TRAF1 | 59269 | HIVEP3    | L |
| 7186 | TRAF2 | 7189  | TRAF6     | R |
| 7186 | TRAF2 | 7292  | TNFSF4    | L |
| 7186 | TRAF2 | 7293  | TNFRSF4   | L |
| 7186 | TRAF2 | 7597  | ZBTB25    | R |
| 7186 | TRAF2 | 7704  | ZBTB16    | R |
| 7186 | TRAF2 | 7755  | ZNF205    | R |
| 7186 | TRAF2 | 7874  | USP7      | L |
| 7186 | TRAF2 | 8204  | NRIP1     | R |
| 7186 | TRAF2 | 8717  | TRADD     | L |
| 7186 | TRAF2 | 8737  | RIPK1     | L |
| 7186 | TRAF2 | 8744  | TNFSF9    | L |
| 7186 | TRAF2 | 8764  | TNFRSF14  | L |
| 7186 | TRAF2 | 8767  | RIPK2     | L |
| 7186 | TRAF2 | 8784  | TNFRSF18  | L |
| 7186 | TRAF2 | 8792  | TNFRSF11A | L |
| 7186 | TRAF2 | 8837  | CFLAR     | L |
| 7186 | TRAF2 | 8877  | SPHK1     | L |
| 7186 | TRAF2 | 8915  | BCL10     | L |
| 7186 | TRAF2 | 9020  | MAP3K14   | L |
| 7186 | TRAF2 | 9099  | USP2      | R |
| 7186 | TRAF2 | 9491  | PSMF1     | R |
| 7186 | TRAF2 | 9513  | FXR2      | R |
| 7186 | TRAF2 | 9726  | ZNF646    | R |
| 7186 | TRAF2 | 9729  | KIAA0408  | R |
| 7186 | TRAF2 | 9787  | DLG7      | R |
| 7186 | TRAF2 | 9825  | SPATA2    | R |
| 7186 | TRAF2 | 9994  | CASP8AP2  | L |
| 7186 | TRAF2 | 10010 | TANK      | L |
| 7186 | TRAF2 | 10241 | NDP52     | R |
| 7186 | TRAF2 | 10253 | SPRY2     | R |
| 7186 | TRAF2 | 10293 | TRIP      | L |
| 7186 | TRAF2 | 10636 | RGS14     | R |
| 7186 | TRAF2 | 10758 | TRAF3IP2  | R |
| 7186 | TRAF2 | 10892 | MALT1     | L |
| 7186 | TRAF2 | 11035 | RIPK3     | L |
| 7186 | TRAF2 | 11063 | SOX30     | R |
| 7186 | TRAF2 | 11074 | TRIM31    | R |
| 7186 | TRAF2 | 11170 | TU3A      | R |
| 7186 | TRAF2 | 11183 | MAP4K5    | L |
| 7186 | TRAF2 | 22893 | BAHD1     | R |
| 7186 | TRAF2 | 23099 | ZNF297B   | R |
| 7186 | TRAF2 | 23219 | FBXO28    | R |
| 7186 | TRAF2 | 23495 | TNFRSF13B | L |
| 7186 | TRAF2 | 25978 | CHMP2B    | R |
| 7186 | TRAF2 | 25988 | MIZF      | R |
| 7186 | TRAF2 | 26003 | GORASP2   | R |
| 7186 | TRAF2 | 26060 | APPL      | R |
| 7186 | TRAF2 | 26133 | TRPC4AP   | L |
| 7186 | TRAF2 | 26150 | RIBC2     | R |
| 7186 | TRAF2 | 27018 | NGFRAP1   | L |
| 7186 | TRAF2 | 27125 | AFF4      | R |
| 7186 | TRAF2 | 27301 | APEX2     | R |
| 7186 | TRAF2 | 51194 | IPO11     | R |
| 7186 | TRAF2 | 51224 | TCEB3B    | R |
| 7186 | TRAF2 | 51324 | SPG21     | R |
| 7186 | TRAF2 | 51330 | TNFRSF12A | L |
| 7186 | TRAF2 | 51347 | TAOK3     | L |

|      |       |        |           |    |
|------|-------|--------|-----------|----|
| 7186 | TRAF2 | 51567  | TTRAP     | L  |
| 7186 | TRAF2 | 54469  | ZA20D3    | R  |
| 7186 | TRAF2 | 54532  | USP53     | R  |
| 7186 | TRAF2 | 54971  | BANP      | R  |
| 7186 | TRAF2 | 55209  | FLJ10707  | R  |
| 7186 | TRAF2 | 55504  | TNFRSF19  | L  |
| 7186 | TRAF2 | 55707  | NECAP2    | R  |
| 7186 | TRAF2 | 59269  | HIVEP3    | L  |
| 7186 | TRAF2 | 60491  | NIF3L1    | R  |
| 7186 | TRAF2 | 60496  | AASDHPPT  | R  |
| 7186 | TRAF2 | 79873  | NUDT18    | R  |
| 7186 | TRAF2 | 80125  | FLJ32855  | R  |
| 7186 | TRAF2 | 80764  | THAP7     | R  |
| 7186 | TRAF2 | 81576  | MGC10471  | R  |
| 7186 | TRAF2 | 83461  | CDCA3     | R  |
| 7186 | TRAF2 | 83707  | TRPT1     | R  |
| 7186 | TRAF2 | 84080  | C16orf48  | R  |
| 7186 | TRAF2 | 84445  | LZTS2     | R  |
| 7186 | TRAF2 | 84498  | KIAA1838  | R  |
| 7186 | TRAF2 | 84708  | LNX       | R  |
| 7186 | TRAF2 | 84832  | MGC12538  | R  |
| 7186 | TRAF2 | 85302  | FBF1      | R  |
| 7186 | TRAF2 | 89885  | FATE1     | R  |
| 7186 | TRAF2 | 91544  | UBXD5     | R  |
| 7186 | TRAF2 | 92610  | TIFA      | RL |
| 7186 | TRAF2 | 116349 | LOC116349 | R  |
| 7186 | TRAF2 | 170082 | MGC17403  | R  |
| 7186 | TRAF2 | 257397 | TAB3      | L  |
| 7186 | TRAF2 | 284058 | LOC284058 | R  |
| 7187 | TRAF3 | 7293   | TNFRSF4   | L  |
| 7187 | TRAF3 | 7874   | USP7      | L  |
| 7187 | TRAF3 | 8717   | TRADD     | L  |
| 7187 | TRAF3 | 8737   | RIPK1     | L  |
| 7187 | TRAF3 | 8764   | TNFRSF14  | L  |
| 7187 | TRAF3 | 8784   | TNFRSF18  | L  |
| 7187 | TRAF3 | 8792   | TNFRSF11A | L  |
| 7187 | TRAF3 | 9020   | MAP3K14   | L  |
| 7187 | TRAF3 | 10010  | TANK      | L  |
| 7187 | TRAF3 | 10487  | CAP1      | L  |
| 7187 | TRAF3 | 10758  | TRAF3IP2  | L  |
| 7187 | TRAF3 | 22800  | RRAS2     | L  |
| 7187 | TRAF3 | 23636  | NUP62     | L  |
| 7187 | TRAF3 | 26146  | TRAF3IP1  | L  |
| 7187 | TRAF3 | 51330  | TNFRSF12A | L  |
| 7187 | TRAF3 | 55504  | TNFRSF19  | L  |
| 7188 | TRAF5 | 7293   | TNFRSF4   | L  |
| 7188 | TRAF5 | 7874   | USP7      | L  |
| 7188 | TRAF5 | 8737   | RIPK1     | L  |
| 7188 | TRAF5 | 8767   | RIPK2     | L  |
| 7188 | TRAF5 | 8792   | TNFRSF11A | L  |
| 7188 | TRAF5 | 23495  | TNFRSF13B | L  |
| 7188 | TRAF5 | 51567  | TTRAP     | L  |
| 7188 | TRAF5 | 55504  | TNFRSF19  | L  |
| 7189 | TRAF6 | 7314   | UBB       | L  |
| 7189 | TRAF6 | 7874   | USP7      | L  |
| 7189 | TRAF6 | 8600   | TNFSF11   | L  |
| 7189 | TRAF6 | 8767   | RIPK2     | L  |
| 7189 | TRAF6 | 8792   | TNFRSF11A | L  |
| 7189 | TRAF6 | 8878   | SQSTM1    | L  |
| 7189 | TRAF6 | 8887   | TAX1BP1   | L  |
| 7189 | TRAF6 | 9020   | MAP3K14   | L  |
| 7189 | TRAF6 | 10454  | MAP3K7IP1 | L  |
| 7189 | TRAF6 | 10758  | TRAF3IP2  | L  |
| 7189 | TRAF6 | 10892  | MALT1     | L  |
| 7189 | TRAF6 | 11213  | IRAK3     | L  |
| 7189 | TRAF6 | 23139  | MAST2     | L  |
| 7189 | TRAF6 | 23495  | TNFRSF13B | L  |

|      |        |        |           |    |
|------|--------|--------|-----------|----|
| 7189 | TRAF6  | 51135  | IRAK4     | L  |
| 7189 | TRAF6  | 51567  | TTRAP     | L  |
| 7189 | TRAF6  | 54764  | ZRANB1    | L  |
| 7189 | TRAF6  | 55437  | ALS2CR2   | L  |
| 7189 | TRAF6  | 55504  | TNFRSF19  | L  |
| 7189 | TRAF6  | 55540  | IL17RB    | L  |
| 7189 | TRAF6  | 56957  | ZA20D1    | L  |
| 7189 | TRAF6  | 60401  | EDA2R     | L  |
| 7189 | TRAF6  | 92610  | TIFA      | L  |
| 7189 | TRAF6  | 257397 | TAB3      | L  |
| 7200 | TRH    | 7201   | TRHR      | L  |
| 7203 | CCT3   | 7428   | VHL       | L  |
| 7203 | CCT3   | 8892   | EIF2B2    | S  |
| 7203 | CCT3   | 10534  | SSSCA1    | R  |
| 7203 | CCT3   | 10949  | HNRPA0    | S  |
| 7205 | TRIP6  | 7414   | VCL       | R  |
| 7205 | TRIP6  | 8440   | NCK2      | R  |
| 7205 | TRIP6  | 8572   | PDLIM4    | L  |
| 7205 | TRIP6  | 9170   | EDG4      | L  |
| 7205 | TRIP6  | 9564   | BCAR1     | L  |
| 7205 | TRIP6  | 9883   | POM121    | R  |
| 7205 | TRIP6  | 23225  | NUP210    | L  |
| 7205 | TRIP6  | 54855  | FAM46C    | R  |
| 7205 | TRIP6  | 79843  | FLJ22746  | R  |
| 7205 | TRIP6  | 80726  | KIAA1683  | R  |
| 7205 | TRIP6  | 84988  | PPP1R16A  | R  |
| 7205 | TRIP6  | 116349 | LOC116349 | R  |
| 7205 | TRIP6  | 117144 | CATSPER1  | R  |
| 7222 | TRPC3  | 8775   | NAPA      | L  |
| 7224 | TRPC5  | 9368   | SLC9A3R1  | L  |
| 7224 | TRPC5  | 11075  | STMN2     | L  |
| 7225 | TRPC6  | 7226   | TRPM2     | L  |
| 7247 | TSN    | 7257   | TSNAX     | L  |
| 7248 | TSC1   | 7249   | TSC2      | L  |
| 7248 | TSC1   | 7430   | VIL2      | L  |
| 7248 | TSC1   | 7529   | YWHAB     | L  |
| 7248 | TSC1   | 7531   | YWHAE     | L  |
| 7248 | TSC1   | 7532   | YWHAG     | L  |
| 7248 | TSC1   | 7533   | YWHAH     | L  |
| 7248 | TSC1   | 7534   | YWHAZ     | L  |
| 7248 | TSC1   | 10971  | YWHAQ     | L  |
| 7249 | TSC2   | 7529   | YWHAB     | L  |
| 7249 | TSC2   | 7531   | YWHAE     | L  |
| 7249 | TSC2   | 7532   | YWHAG     | L  |
| 7249 | TSC2   | 7533   | YWHAH     | L  |
| 7249 | TSC2   | 7534   | YWHAZ     | L  |
| 7249 | TSC2   | 9135   | RABEP1    | L  |
| 7249 | TSC2   | 10971  | YWHAQ     | L  |
| 7251 | TSG101 | 8495   | PPFIBP2   | R  |
| 7251 | TSG101 | 9146   | HGS       | RL |
| 7251 | TSG101 | 51160  | VPS28     | RL |
| 7251 | TSG101 | 55165  | C10orf3   | R  |
| 7251 | TSG101 | 55929  | DMAP1     | L  |
| 7251 | TSG101 | 79720  | VPS37B    | L  |
| 7251 | TSG101 | 90678  | LRSAM1    | R  |
| 7251 | TSG101 | 137492 | VPS37A    | L  |
| 7252 | TSHB   | 7253   | TSHR      | L  |
| 7253 | TSHR   | 10672  | GNA13     | L  |
| 7257 | TSNAX  | 10438  | C1D       | L  |
| 7257 | TSNAX  | 10912  | GADD45G   | R  |
| 7257 | TSNAX  | 55815  | TSNAXIP1  | L  |
| 7257 | TSNAX  | 57326  | PBXIP1    | R  |
| 7257 | TSNAX  | 114932 | MRFAP1L1  | R  |
| 7259 | TSPYL1 | 9001   | HAP1      | S  |
| 7267 | TTC3   | 55729  | ATF7IP    | L  |
| 7270 | TTF1   | 8850   | PCAF      | L  |
| 7270 | TTF1   | 11176  | BAZ2A     | L  |

|      |        |        |           |   |
|------|--------|--------|-----------|---|
| 7270 | TTF1   | 284119 | PTRF      | L |
| 7273 | TTN    | 8557   | TCAP      | L |
| 7273 | TTN    | 8736   | MYOM1     | L |
| 7273 | TTN    | 9172   | MYOM2     | L |
| 7273 | TTN    | 27063  | ANKRD1    | L |
| 7273 | TTN    | 84033  | OBSCN     | L |
| 7273 | TTN    | 84676  | TRIM63    | L |
| 7276 | TTR    | 7431   | VIM       | S |
| 7276 | TTR    | 8518   | IKBKAP    | S |
| 7276 | TTR    | 9638   | FEZ1      | S |
| 7276 | TTR    | 9796   | PHYHIP    | S |
| 7276 | TTR    | 9869   | SETDB1    | S |
| 7276 | TTR    | 51608  | C7orf20   | S |
| 7277 | TUBA1  | 7535   | ZAP70     | L |
| 7277 | TUBA1  | 10808  | HSPH1     | L |
| 7277 | TUBA1  | 29127  | RACGAP1   | L |
| 7277 | TUBA1  | 51762  | RAB8B     | L |
| 7277 | TUBA1  | 55147  | RBM23     | S |
| 7277 | TUBA1  | 84103  | C4orf17   | S |
| 7277 | TUBA1  | 90627  | STARD13   | L |
| 7277 | TUBA1  | 375484 | FLJ44216  | S |
| 7278 | TUBA2  | 7283   | TUBG1     | L |
| 7278 | TUBA2  | 8655   | DNCL1     | L |
| 7278 | TUBA2  | 9111   | NMI       | R |
| 7280 | TUBB2  | 9419   | CRIP1     | L |
| 7280 | TUBB2  | 9672   | SDC3      | L |
| 7280 | TUBB2  | 10399  | GNB2L1    | L |
| 7280 | TUBB2  | 10567  | RABAC1    | S |
| 7280 | TUBB2  | 11186  | RASSF1    | L |
| 7280 | TUBB2  | 51762  | RAB8B     | L |
| 7280 | TUBB2  | 54622  | ARFRP2    | S |
| 7280 | TUBB2  | 57787  | MARK4     | L |
| 7280 | TUBB2  | 60626  | RIC8A     | S |
| 7280 | TUBB2  | 83988  | NCALD     | L |
| 7283 | TUBG1  | 10376  | K-ALPHA-1 | L |
| 7283 | TUBG1  | 10426  | TUBGCP3   | L |
| 7283 | TUBG1  | 11186  | RASSF1    | L |
| 7283 | TUBG1  | 25897  | RNF19     | L |
| 7283 | TUBG1  | 29127  | RACGAP1   | L |
| 7283 | TUBG1  | 55835  | CENPJ     | L |
| 7283 | TUBG1  | 79902  | PCNT1     | L |
| 7286 | TUFT1  | 24144  | TFIP11    | L |
| 7290 | HIRA   | 8349   | HIST2H2BE | L |
| 7290 | HIRA   | 8479   | HIRIP3    | L |
| 7290 | HIRA   | 27247  | HIRIP5    | L |
| 7290 | HIRA   | 85236  | HIST1H2BK | L |
| 7291 | TWIST1 | 8850   | PCAF      | L |
| 7292 | TNFSF4 | 7293   | TNFRSF4   | L |
| 7294 | TXK    | 91746  | YT521     | L |
| 7295 | TXN    | 10628  | TXNIP     | L |
| 7296 | TXNRD1 | 10628  | TXNIP     | L |
| 7296 | TXNRD1 | 84988  | PPP1R16A  | S |
| 7297 | TYK2   | 7409   | VAV1      | L |
| 7297 | TYK2   | 7520   | XRCC5     | L |
| 7297 | TYK2   | 8660   | IRS2      | L |
| 7297 | TYK2   | 10254  | STAM2     | L |
| 7297 | TYK2   | 10399  | GNB2L1    | L |
| 7297 | TYK2   | 10419  | SKB1      | L |
| 7301 | TYRO3  | 7525   | YES1      | L |
| 7305 | TYROBP | 9436   | NCR2      | L |
| 7305 | TYROBP | 10326  | SIRPB1    | L |
| 7305 | TYROBP | 23601  | CLEC5A    | L |
| 7305 | TYROBP | 54209  | TREM2     | L |
| 7306 | TYRP1  | 10755  | GIPC1     | L |
| 7307 | U2AF1  | 7414   | VCL       | L |
| 7307 | U2AF1  | 8233   | U2AF1L2   | L |
| 7307 | U2AF1  | 9406   | ZNF265    | L |



|      |        |        |           |    |
|------|--------|--------|-----------|----|
| 7307 | U2AF1  | 10482  | NXF1      | L  |
| 7307 | U2AF1  | 11338  | U2AF2     | RL |
| 7307 | U2AF1  | 23451  | SF3B1     | L  |
| 7311 | UBA52  | 7320   | UBE2B     | L  |
| 7311 | UBA52  | 7805   | LAPTM5    | L  |
| 7311 | UBA52  | 7874   | USP7      | L  |
| 7311 | UBA52  | 8027   | STAM      | L  |
| 7311 | UBA52  | 8728   | ADAM19    | L  |
| 7311 | UBA52  | 8878   | SQSTM1    | L  |
| 7311 | UBA52  | 9146   | HGS       | L  |
| 7311 | UBA52  | 10013  | HDAC6     | L  |
| 7311 | UBA52  | 10254  | STAM2     | L  |
| 7311 | UBA52  | 26994  | RNF11     | L  |
| 7314 | UBB    | 8517   | IKBKG     | L  |
| 7314 | UBB    | 9627   | SNCAIP    | L  |
| 7314 | UBB    | 9802   | DAZAP2    | R  |
| 7314 | UBB    | 10892  | MALT1     | L  |
| 7314 | UBB    | 26994  | RNF11     | L  |
| 7316 | UBC    | 7345   | UCHL1     | S  |
| 7316 | UBC    | 7414   | VCL       | L  |
| 7316 | UBC    | 9802   | DAZAP2    | R  |
| 7316 | UBC    | 22839  | DLGAP4    | S  |
| 7316 | UBC    | 26994  | RNF11     | L  |
| 7316 | UBC    | 56957  | ZA20D1    | L  |
| 7317 | UBE1   | 9911   | TMCC2     | S  |
| 7317 | UBE1   | 10078  | TSSC4     | S  |
| 7317 | UBE1   | 10808  | HSPH1     | L  |
| 7318 | UBE1L  | 9636   | G1P2      | R  |
| 7319 | UBE2A  | 7750   | ZNF198    | L  |
| 7319 | UBE2A  | 56852  | RAD18     | L  |
| 7320 | UBE2B  | 9094   | UNC119    | S  |
| 7320 | UBE2B  | 23304  | UBR2      | L  |
| 7320 | UBE2B  | 51003  | MED31     | S  |
| 7320 | UBE2B  | 56852  | RAD18     | L  |
| 7320 | UBE2B  | 197131 | UBR1      | S  |
| 7321 | UBE2D1 | 7337   | UBE3A     | L  |
| 7321 | UBE2D1 | 10273  | STUB1     | L  |
| 7321 | UBE2D1 | 55658  | RNF126    | R  |
| 7321 | UBE2D1 | 56658  | TRIM39    | R  |
| 7322 | UBE2D2 | 8945   | BTRC      | L  |
| 7322 | UBE2D2 | 9867   | PJA2      | L  |
| 7322 | UBE2D2 | 26994  | RNF11     | L  |
| 7323 | UBE2D3 | 7337   | UBE3A     | L  |
| 7323 | UBE2D3 | 55658  | RNF126    | R  |
| 7323 | UBE2D3 | 56658  | TRIM39    | R  |
| 7323 | UBE2D3 | 84206  | RKHD3     | S  |
| 7324 | UBE2E1 | 7326   | UBE2G1    | L  |
| 7324 | UBE2E1 | 7337   | UBE3A     | L  |
| 7324 | UBE2E1 | 9025   | RNF8      | L  |
| 7324 | UBE2E1 | 9604   | RNF14     | L  |
| 7324 | UBE2E1 | 23327  | NEDD4L    | L  |
| 7324 | UBE2E1 | 220869 | CBWD5     | S  |
| 7325 | UBE2E2 | 9025   | RNF8      | L  |
| 7326 | UBE2G1 | 7337   | UBE3A     | L  |
| 7327 | UBE2G2 | 7337   | UBE3A     | L  |
| 7327 | UBE2G2 | 23113  | PARC      | L  |
| 7328 | UBE2H  | 8337   | HIST2H2AA | L  |
| 7329 | UBE2I  | 7341   | SUMO1     | L  |
| 7329 | UBE2I  | 7490   | WT1       | L  |
| 7329 | UBE2I  | 8535   | CBX4      | L  |
| 7329 | UBE2I  | 8554   | PIAS1     | L  |
| 7329 | UBE2I  | 8767   | RIPK2     | R  |
| 7329 | UBE2I  | 9063   | PIAS2     | RL |
| 7329 | UBE2I  | 9094   | UNC119    | S  |
| 7329 | UBE2I  | 9146   | HGS       | R  |
| 7329 | UBE2I  | 9189   | ZBED1     | R  |
| 7329 | UBE2I  | 9260   | PDLIM7    | R  |

|      |         |        |          |   |
|------|---------|--------|----------|---|
| 7329 | UBE2I   | 9618   | TRAF4    | L |
| 7329 | UBE2I   | 9726   | ZNF646   | R |
| 7329 | UBE2I   | 10210  | TOPORS   | L |
| 7329 | UBE2I   | 10320  | ZNFN1A1  | R |
| 7329 | UBE2I   | 22806  | ZNFN1A3  | R |
| 7329 | UBE2I   | 23386  | NUDCD3   | R |
| 7329 | UBE2I   | 23650  | TRIM29   | R |
| 7329 | UBE2I   | 25788  | RAD54B   | R |
| 7329 | UBE2I   | 26036  | ZNF451   | R |
| 7329 | UBE2I   | 28996  | HIPK2    | L |
| 7329 | UBE2I   | 51567  | TTRAP    | L |
| 7329 | UBE2I   | 55660  | FNBP3    | L |
| 7329 | UBE2I   | 79753  | SNIP1    | L |
| 7329 | UBE2I   | 84676  | TRIM63   | L |
| 7329 | UBE2I   | 93487  | C14orf32 | R |
| 7329 | UBE2I   | 128866 | CHMP4B   | R |
| 7329 | UBE2I   | 147339 | C18orf25 | R |
| 7332 | UBE2L3  | 7337   | UBE3A    | L |
| 7332 | UBE2L3  | 9781   | RNF144   | L |
| 7332 | UBE2L3  | 10425  | ARIH2    | S |
| 7332 | UBE2L3  | 23113  | PARC     | L |
| 7332 | UBE2L3  | 23327  | NEDD4L   | L |
| 7332 | UBE2L3  | 25820  | ARIH1    | L |
| 7332 | UBE2L3  | 25897  | RNF19    | L |
| 7334 | UBE2N   | 7336   | UBE2V2   | L |
| 7334 | UBE2N   | 8915   | BCL10    | L |
| 7334 | UBE2N   | 26994  | RNF11    | L |
| 7334 | UBE2N   | 387522 | Kua-UEV  | L |
| 7336 | UBE2V2  | 8915   | BCL10    | L |
| 7336 | UBE2V2  | 25843  | PREI3    | S |
| 7336 | UBE2V2  | 55791  | C1orf103 | S |
| 7336 | UBE2V2  | 79723  | SUV39H2  | S |
| 7336 | UBE2V2  | 84966  | IGSF21   | S |
| 7337 | UBE3A   | 9083   | BPY2     | L |
| 7337 | UBE3A   | 9246   | UBE2L6   | L |
| 7337 | UBE3A   | 9820   | CUL7     | L |
| 7341 | SUMO1   | 8554   | PIAS1    | L |
| 7341 | SUMO1   | 9063   | PIAS2    | L |
| 7341 | SUMO1   | 9734   | HDAC9    | L |
| 7341 | SUMO1   | 10054  | UBA2     | L |
| 7341 | SUMO1   | 10210  | TOPORS   | L |
| 7341 | SUMO1   | 26054  | SENP6    | L |
| 7341 | SUMO1   | 28996  | HIPK2    | L |
| 7341 | SUMO1   | 51567  | TTRAP    | L |
| 7341 | SUMO1   | 59343  | SENP2    | L |
| 7341 | SUMO1   | 114034 | TOE1     | S |
| 7341 | SUMO1   | 160140 | MGC33948 | R |
| 7343 | UBTF    | 8660   | IRS2     | L |
| 7343 | UBTF    | 10849  | CD3EAP   | L |
| 7343 | UBTF    | 51176  | LEF1     | L |
| 7345 | UCHL1   | 10048  | RANBP9   | L |
| 7345 | UCHL1   | 10951  | CBX1     | S |
| 7345 | UCHL1   | 10987  | COPS5    | L |
| 7351 | UCP2    | 7529   | YWHAB    | L |
| 7351 | UCP2    | 7534   | YWHAZ    | L |
| 7351 | UCP2    | 10971  | YWHAQ    | L |
| 7352 | UCP3    | 7529   | YWHAB    | L |
| 7352 | UCP3    | 7534   | YWHAZ    | L |
| 7352 | UCP3    | 10971  | YWHAQ    | L |
| 7355 | SLC35A2 | 7368   | UGT8     | L |
| 7355 | SLC35A2 | 284169 | (null)   | S |
| 7356 | SCGB1A1 | 8029   | CUBN     | L |
| 7358 | UGDH    | 26289  | AK5      | S |
| 7360 | UGP2    | 10425  | ARIH2    | R |
| 7372 | UMPS    | 10602  | CDC42EP3 | S |
| 7374 | UNG     | 8493   | PPM1D    | L |
| 7375 | USP4    | 9221   | NOLC1    | L |

|      |        |        |           |   |
|------|--------|--------|-----------|---|
| 7376 | NR1H2  | 8431   | NR0B2     | L |
| 7378 | UPP1   | 7431   | VIM       | L |
| 7384 | UQCRC1 | 54205  | CYCS      | L |
| 7384 | UQCRC1 | 57142  | RTN4      | L |
| 7385 | UQCRC2 | 57142  | RTN4      | L |
| 7391 | USF1   | 7392   | USF2      | L |
| 7391 | USF1   | 8061   | FOSL1     | L |
| 7392 | USF2   | 10891  | PPARGC1A  | L |
| 7407 | VARS   | 85476  | GFM1      | L |
| 7408 | VASP   | 7414   | VCL       | L |
| 7408 | VASP   | 7454   | WAS       | L |
| 7408 | VASP   | 7791   | ZYX       | L |
| 7408 | VASP   | 8996   | NOL3      | R |
| 7408 | VASP   | 11060  | WWP2      | R |
| 7408 | VASP   | 23214  | XPO6      | L |
| 7408 | VASP   | 26136  | TES       | L |
| 7408 | VASP   | 63948  | DMRTB1    | R |
| 7408 | VASP   | 114088 | TRIM9     | R |
| 7409 | VAV1   | 7535   | ZAP70     | L |
| 7409 | VAV1   | 7791   | ZYX       | L |
| 7409 | VAV1   | 8639   | AOC3      | L |
| 7409 | VAV1   | 8651   | SOCS1     | L |
| 7409 | VAV1   | 29127  | RACGAP1   | L |
| 7409 | VAV1   | 29760  | BLNK      | L |
| 7409 | VAV1   | 55824  | PAG1      | L |
| 7410 | VAV2   | 8651   | SOCS1     | L |
| 7411 | VBP1   | 7428   | VHL       | L |
| 7412 | VCAM1  | 7430   | VIL2      | L |
| 7414 | VCL    | 7431   | VIM       | L |
| 7414 | VCL    | 8087   | FXR1      | L |
| 7414 | VCL    | 8148   | TAF15     | L |
| 7414 | VCL    | 8665   | EIF3S5    | L |
| 7414 | VCL    | 9121   | SLC16A5   | L |
| 7414 | VCL    | 9530   | BAG4      | L |
| 7414 | VCL    | 9879   | DDX46     | L |
| 7414 | VCL    | 9898   | UBAP2L    | L |
| 7414 | VCL    | 9987   | HNRPDL    | L |
| 7414 | VCL    | 10146  | G3BP      | L |
| 7414 | VCL    | 10152  | ABI2      | R |
| 7414 | VCL    | 10196  | HRMT1L3   | L |
| 7414 | VCL    | 10383  | TUBB2     | L |
| 7414 | VCL    | 10391  | CORO2B    | L |
| 7414 | VCL    | 10399  | GNB2L1    | L |
| 7414 | VCL    | 10446  | LRRN5     | L |
| 7414 | VCL    | 10492  | SYNCRIP   | L |
| 7414 | VCL    | 10565  | ARFGEF1   | L |
| 7414 | VCL    | 10580  | SORBS1    | L |
| 7414 | VCL    | 10657  | KHDRBS1   | L |
| 7414 | VCL    | 10970  | CKAP4     | L |
| 7414 | VCL    | 11051  | NUDT21    | L |
| 7414 | VCL    | 11338  | U2AF2     | L |
| 7414 | VCL    | 23038  | WDTA1     | L |
| 7414 | VCL    | 23116  | KIAA0423  | L |
| 7414 | VCL    | 23231  | KIAA0746  | L |
| 7414 | VCL    | 23256  | SCFD1     | L |
| 7414 | VCL    | 23345  | SYNE1     | L |
| 7414 | VCL    | 26960  | NBEA      | L |
| 7414 | VCL    | 26986  | PABPC1    | L |
| 7414 | VCL    | 27136  | MORC1     | L |
| 7414 | VCL    | 51056  | LAP3      | L |
| 7414 | VCL    | 51493  | HSPC117   | L |
| 7414 | VCL    | 51637  | C14orf166 | L |
| 7414 | VCL    | 51806  | CALML5    | L |
| 7414 | VCL    | 54205  | CYCS      | L |
| 7414 | VCL    | 54914  | KIAA1797  | L |
| 7414 | VCL    | 55379  | PRO1855   | L |
| 7414 | VCL    | 55660  | FNBP3     | L |

|      |       |        |           |    |
|------|-------|--------|-----------|----|
| 7414 | VCL   | 57099  | AVEN      | L  |
| 7414 | VCL   | 57448  | BIRC6     | L  |
| 7414 | VCL   | 79173  | MGC11271  | R  |
| 7414 | VCL   | 84733  | CBX2      | L  |
| 7414 | VCL   | 121457 | IKIP      | L  |
| 7414 | VCL   | 125950 | RAVER1    | L  |
| 7414 | VCL   | 129563 | MGC42174  | L  |
| 7414 | VCL   | 137994 | LETM2     | L  |
| 7414 | VCL   | 151254 | ALS2CR11  | L  |
| 7414 | VCL   | 201158 | FAM18B2   | L  |
| 7414 | VCL   | 284058 | LOC284058 | L  |
| 7415 | VCP   | 10013  | HDAC6     | L  |
| 7415 | VCP   | 10953  | TOMM34    | L  |
| 7415 | VCP   | 55829  | SELS      | L  |
| 7415 | VCP   | 55968  | NSFL1C    | L  |
| 7416 | VDAC1 | 9804   | TOMM20    | L  |
| 7416 | VDAC1 | 10018  | BCL2L11   | L  |
| 7416 | VDAC1 | 54205  | CYCS      | L  |
| 7417 | VDAC2 | 54205  | CYCS      | L  |
| 7419 | VDAC3 | 57062  | DDX24     | S  |
| 7421 | VDR   | 7704   | ZBTB16    | L  |
| 7421 | VDR   | 8202   | NCOA3     | L  |
| 7421 | VDR   | 8648   | NCOA1     | L  |
| 7421 | VDR   | 8805   | TRIM24    | L  |
| 7421 | VDR   | 9031   | BAZ1B     | L  |
| 7421 | VDR   | 10499  | NCOA2     | L  |
| 7421 | VDR   | 22938  | SNW1      | L  |
| 7422 | VEGF  | 7448   | VTN       | L  |
| 7422 | VEGF  | 8828   | NRP2      | L  |
| 7422 | VEGF  | 8829   | NRP1      | L  |
| 7422 | VEGF  | 9510   | ADAMTS1   | L  |
| 7423 | VEGFB | 8829   | NRP1      | L  |
| 7428 | VHL   | 10168  | ZNF197    | L  |
| 7428 | VHL   | 11236  | RNF139    | L  |
| 7428 | VHL   | 23032  | USP33     | L  |
| 7428 | VHL   | 55662  | HIF1AN    | L  |
| 7428 | VHL   | 57473  | GM632     | L  |
| 7428 | VHL   | 79960  | PHF17     | L  |
| 7429 | VIL1  | 56159  | TEX11     | R  |
| 7430 | VIL2  | 9351   | SLC9A3R2  | L  |
| 7430 | VIL2  | 9368   | SLC9A3R1  | L  |
| 7430 | VIL2  | 23022  | KIAA0992  | L  |
| 7430 | VIL2  | 53405  | CLIC5     | L  |
| 7430 | VIL2  | 57147  | SCYL3     | L  |
| 7431 | VIM   | 7518   | XRCC4     | S  |
| 7431 | VIM   | 7534   | YWHAZ     | L  |
| 7431 | VIM   | 8553   | BHLHB2    | S  |
| 7431 | VIM   | 8655   | DNCL1     | L  |
| 7431 | VIM   | 8764   | TNFRSF14  | S  |
| 7431 | VIM   | 8880   | FUBP1     | S  |
| 7431 | VIM   | 9124   | PDLIM1    | R  |
| 7431 | VIM   | 9729   | KIAA0408  | R  |
| 7431 | VIM   | 10155  | TRIM28    | S  |
| 7431 | VIM   | 10362  | HMG20B    | S  |
| 7431 | VIM   | 10567  | RABAC1    | S  |
| 7431 | VIM   | 10625  | IVNS1ABP  | S  |
| 7431 | VIM   | 10807  | SDCCAG3   | S  |
| 7431 | VIM   | 11078  | TRIOBP    | S  |
| 7431 | VIM   | 11143  | MYST2     | RS |
| 7431 | VIM   | 11170  | TU3A      | R  |
| 7431 | VIM   | 22827  | SIAHBP1   | S  |
| 7431 | VIM   | 22927  | HABP4     | S  |
| 7431 | VIM   | 23650  | TRIM29    | L  |
| 7431 | VIM   | 23762  | OSBP2     | L  |
| 7431 | VIM   | 23774  | BRD1      | S  |
| 7431 | VIM   | 26135  | SERBP1    | S  |
| 7431 | VIM   | 26150  | RIBC2     | R  |

|      |         |        |          |   |
|------|---------|--------|----------|---|
| 7431 | VIM     | 26751  | SH3YL1   | S |
| 7431 | VIM     | 27229  | 76P      | R |
| 7431 | VIM     | 28965  | SLC27A6  | S |
| 7431 | VIM     | 51074  | MMRP19   | R |
| 7431 | VIM     | 51548  | SIRT6    | S |
| 7431 | VIM     | 51593  | ARS2     | S |
| 7431 | VIM     | 51762  | RAB8B    | L |
| 7431 | VIM     | 54474  | KRT20    | R |
| 7431 | VIM     | 54544  | C1orf42  | S |
| 7431 | VIM     | 55211  | DPPA4    | S |
| 7431 | VIM     | 55791  | C1orf103 | S |
| 7431 | VIM     | 56992  | KIF15    | S |
| 7431 | VIM     | 57002  | C7orf36  | S |
| 7431 | VIM     | 57120  | GOPC     | R |
| 7431 | VIM     | 60491  | NIF3L1   | R |
| 7431 | VIM     | 64780  | MICAL1   | L |
| 7431 | VIM     | 65080  | MRPL44   | S |
| 7431 | VIM     | 79050  | NOC4L    | R |
| 7431 | VIM     | 79902  | PCNT1    | L |
| 7431 | VIM     | 84260  | MGC10854 | R |
| 7431 | VIM     | 129563 | MGC42174 | S |
| 7431 | VIM     | 151254 | ALS2CR11 | R |
| 7433 | VIPR1   | 8976   | WASL     | L |
| 7436 | VLDLR   | 9784   | SNX17    | L |
| 7442 | TRPV1   | 143425 | SYT9     | L |
| 7447 | VSNL1   | 113878 | DTX2     | R |
| 7447 | VSNL1   | 348487 | C1orf117 | R |
| 7448 | VTN     | 8516   | ITGA8    | L |
| 7448 | VTN     | 90070  | LACRT    | L |
| 7450 | VWF     | 57473  | GM632    | L |
| 7453 | WARS    | 10263  | CDK2AP2  | S |
| 7454 | WAS     | 7456   | WASPIP   | L |
| 7454 | WAS     | 9051   | PSTPIP1  | L |
| 7454 | WAS     | 9322   | TRIP10   | L |
| 7454 | WAS     | 23433  | RHOQ     | L |
| 7454 | WAS     | 50618  | ITSN2    | L |
| 7454 | WAS     | 57381  | RHOJ     | L |
| 7456 | WASPIP  | 8976   | WASL     | L |
| 7458 | WBSCR1  | 83638  | Bles03   | R |
| 7462 | LAT2    | 29760  | BLNK     | L |
| 7465 | WEE1    | 7529   | YWHAB    | L |
| 7465 | WEE1    | 83461  | CDCA3    | L |
| 7471 | WNT1    | 8326   | FZD9     | L |
| 7474 | WNT5A   | 7855   | FZD5     | L |
| 7474 | WNT5A   | 8321   | FZD1     | L |
| 7476 | WNT7A   | 29888  | STRN4    | S |
| 7486 | WRN     | 7520   | XRCC5    | L |
| 7486 | WRN     | 9533   | POLR1C   | L |
| 7486 | WRN     | 56897  | WRNIP1   | L |
| 7486 | WRN     | 201299 | RDM1     | L |
| 7490 | WT1     | 9589   | WTAP     | L |
| 7490 | WT1     | 11338  | U2AF2    | L |
| 7494 | XBP1    | 22926  | ATF6     | L |
| 7494 | XBP1    | 58487  | ZF       | L |
| 7507 | XPA     | 11321  | XAB1     | L |
| 7508 | XPC     | 27258  | LSM3     | L |
| 7508 | XPC     | 57473  | GM632    | L |
| 7511 | XPNPEP1 | 23649  | POLA2    | S |
| 7511 | XPNPEP1 | 60561  | RINT-1   | S |
| 7514 | XPO1    | 8021   | NUP214   | L |
| 7514 | XPO1    | 8498   | RANBP3   | L |
| 7514 | XPO1    | 8678   | BECN1    | L |
| 7514 | XPO1    | 8841   | HDAC3    | L |
| 7514 | XPO1    | 9972   | NUP153   | L |
| 7514 | XPO1    | 10073  | RNUT1    | L |
| 7514 | XPO1    | 10762  | NUP50    | L |
| 7514 | XPO1    | 23636  | NUP62    | L |

|      |       |        |                 |   |
|------|-------|--------|-----------------|---|
| 7514 | XPO1  | 56000  | NXF3            | L |
| 7514 | XPO1  | 57154  | SMURF1          | L |
| 7514 | XPO1  | 407977 | TNFSF12-TNFSF13 | L |
| 7515 | XRCC1 | 11284  | PNKP            | L |
| 7515 | XRCC1 | 54840  | APTX            | L |
| 7515 | XRCC1 | 79661  | NEIL1           | L |
| 7518 | XRCC4 | 25900  | HOM-TES-103     | R |
| 7518 | XRCC4 | 54840  | APTX            | L |
| 7518 | XRCC4 | 79886  | C9orf82         | S |
| 7520 | XRCC5 | 10432  | RBM14           | L |
| 7525 | YES1  | 8038   | ADAM12          | L |
| 7525 | YES1  | 10413  | YAP1            | L |
| 7525 | YES1  | 23607  | CD2AP           | L |
| 7525 | YES1  | 57473  | GM632           | L |
| 7525 | YES1  | 59341  | TRPV4           | L |
| 7528 | YY1   | 8726   | EED             | L |
| 7528 | YY1   | 8819   | SAP30           | L |
| 7528 | YY1   | 8841   | HDAC3           | L |
| 7528 | YY1   | 9406   | ZNF265          | L |
| 7528 | YY1   | 10138  | YAF2            | L |
| 7528 | YY1   | 11016  | ATF7            | L |
| 7528 | YY1   | 23429  | RYBP            | L |
| 7529 | YWHAB | 7538   | ZFP36           | L |
| 7529 | YWHAB | 9610   | RIN1            | L |
| 7529 | YWHAB | 10014  | HDAC5           | L |
| 7529 | YWHAB | 10420  | TESK2           | L |
| 7529 | YWHAB | 10749  | KIF1C           | L |
| 7529 | YWHAB | 22877  | MONDOA          | L |
| 7529 | YWHAB | 23136  | EPB41L3         | L |
| 7531 | YWHAE | 8470   | SORBS2          | R |
| 7531 | YWHAE | 8660   | IRS2            | L |
| 7531 | YWHAE | 9181   | ARHGEF2         | L |
| 7531 | YWHAE | 9402   | GRAP2           | R |
| 7531 | YWHAE | 9610   | RIN1            | L |
| 7531 | YWHAE | 9721   | KIAA0514        | R |
| 7531 | YWHAE | 9759   | HDAC4           | L |
| 7531 | YWHAE | 10014  | HDAC5           | L |
| 7531 | YWHAE | 10749  | KIF1C           | L |
| 7531 | YWHAE | 25937  | WWTR1           | L |
| 7531 | YWHAE | 27018  | NGFRAP1         | L |
| 7531 | YWHAE | 81565  | NDEL1           | L |
| 7532 | YWHAG | 7538   | ZFP36           | L |
| 7532 | YWHAG | 9729   | KIAA0408        | R |
| 7532 | YWHAG | 10749  | KIF1C           | L |
| 7532 | YWHAG | 23136  | EPB41L3         | L |
| 7532 | YWHAG | 27185  | DISC1           | L |
| 7533 | YWHAH | 7538   | ZFP36           | L |
| 7533 | YWHAH | 8202   | NCOA3           | L |
| 7533 | YWHAH | 8204   | NRIP1           | L |
| 7533 | YWHAH | 8648   | NCOA1           | L |
| 7533 | YWHAH | 9699   | RIMS2           | L |
| 7533 | YWHAH | 10499  | NCOA2           | L |
| 7533 | YWHAH | 23136  | EPB41L3         | L |
| 7533 | YWHAH | 147700 | KLC3            | L |
| 7534 | YWHAZ | 8660   | IRS2            | L |
| 7534 | YWHAZ | 8745   | ADAM23          | L |
| 7534 | YWHAZ | 9181   | ARHGEF2         | L |
| 7534 | YWHAZ | 9261   | MAPKAPK2        | L |
| 7534 | YWHAZ | 9564   | BCAR1           | L |
| 7534 | YWHAZ | 9610   | RIN1            | L |
| 7534 | YWHAZ | 9759   | HDAC4           | L |
| 7534 | YWHAZ | 10746  | MAP3K2          | L |
| 7534 | YWHAZ | 10749  | KIF1C           | L |
| 7534 | YWHAZ | 25932  | CLIC4           | L |
| 7534 | YWHAZ | 53616  | ADAM22          | L |
| 7534 | YWHAZ | 57562  | KIAA1377        | S |
| 7535 | ZAP70 | 9846   | GAB2            | L |

|      |        |        |               |    |
|------|--------|--------|---------------|----|
| 7535 | ZAP70  | 27240  | SIT1          | L  |
| 7535 | ZAP70  | 28988  | DBNL          | L  |
| 7535 | ZAP70  | 55824  | PAG1          | L  |
| 7535 | ZAP70  | 84174  | SLA2          | L  |
| 7535 | ZAP70  | 114836 | SLAMF6        | L  |
| 7535 | ZAP70  | 115352 | FCRL3         | L  |
| 7536 | SF1    | 8148   | TAF15         | L  |
| 7536 | SF1    | 10521  | DDX17         | R  |
| 7536 | SF1    | 10915  | TCERG1        | L  |
| 7536 | SF1    | 11030  | RBPMS         | R  |
| 7536 | SF1    | 11060  | WWP2          | R  |
| 7536 | SF1    | 11338  | U2AF2         | RL |
| 7536 | SF1    | 55660  | FNBP3         | L  |
| 7538 | ZFP36  | 8021   | NUP214        | L  |
| 7538 | ZFP36  | 11007  | DIPA          | R  |
| 7538 | ZFP36  | 11340  | EXOSC8        | L  |
| 7538 | ZFP36  | 26019  | UPF2          | L  |
| 7538 | ZFP36  | 54464  | XRN1          | L  |
| 7538 | ZFP36  | 118460 | EXOSC6        | L  |
| 7542 | ZFPL1  | 9551   | ATP5J2        | S  |
| 7553 | ZNF7   | 10474  | TADA3L        | S  |
| 7556 | ZNF10  | 8805   | TRIM24        | L  |
| 7556 | ZNF10  | 10155  | TRIM28        | L  |
| 7558 | ZNF11B | 9001   | HAP1          | S  |
| 7568 | ZNF20  | 7727   | ZNF174        | L  |
| 7568 | ZNF20  | 9001   | HAP1          | S  |
| 7572 | ZNF24  | 7704   | ZBTB16        | S  |
| 7572 | ZNF24  | 7727   | ZNF174        | L  |
| 7572 | ZNF24  | 9001   | HAP1          | S  |
| 7572 | ZNF24  | 9094   | UNC119        | S  |
| 7572 | ZNF24  | 9869   | SETDB1        | S  |
| 7572 | ZNF24  | 10524  | HTATIP        | S  |
| 7572 | ZNF24  | 10813  | UTP14A        | S  |
| 7572 | ZNF24  | 10980  | COPS6         | S  |
| 7572 | ZNF24  | 11161  | C14orf1       | S  |
| 7572 | ZNF24  | 51282  | SCAND1        | R  |
| 7572 | ZNF24  | 54925  | ZNF434        | R  |
| 7572 | ZNF24  | 55663  | ZNF446        | R  |
| 7572 | ZNF24  | 55791  | C1orf103      | S  |
| 7572 | ZNF24  | 57562  | KIAA1377      | S  |
| 7572 | ZNF24  | 81576  | MGC10471      | R  |
| 7572 | ZNF24  | 84060  | DKFZP564O0523 | S  |
| 7579 | ZNF31  | 51282  | SCAND1        | R  |
| 7596 | ZNF45  | 374923 | (null)        | S  |
| 7597 | ZBTB25 | 10174  | SORBS3        | R  |
| 7597 | ZBTB25 | 79036  | MGC2749       | R  |
| 7625 | ZNF74  | 10155  | TRIM28        | L  |
| 7704 | ZBTB16 | 8405   | SPOP          | R  |
| 7704 | ZBTB16 | 8813   | DPM1          | S  |
| 7704 | ZBTB16 | 8894   | EIF2S2        | S  |
| 7704 | ZBTB16 | 9611   | NCOR1         | L  |
| 7704 | ZBTB16 | 9612   | NCOR2         | L  |
| 7704 | ZBTB16 | 9734   | HDAC9         | L  |
| 7704 | ZBTB16 | 9759   | HDAC4         | L  |
| 7704 | ZBTB16 | 10013  | HDAC6         | L  |
| 7704 | ZBTB16 | 10014  | HDAC5         | L  |
| 7704 | ZBTB16 | 10542  | HBXIP         | S  |
| 7704 | ZBTB16 | 10628  | TXNIP         | L  |
| 7704 | ZBTB16 | 11007  | DIPA          | R  |
| 7704 | ZBTB16 | 23149  | FCHO1         | S  |
| 7704 | ZBTB16 | 23309  | SIN3B         | L  |
| 7704 | ZBTB16 | 23641  | LDOC1         | R  |
| 7704 | ZBTB16 | 25942  | SIN3A         | L  |
| 7704 | ZBTB16 | 29924  | EPN1          | L  |
| 7704 | ZBTB16 | 51004  | COQ6          | S  |
| 7704 | ZBTB16 | 51433  | ANAPC5        | S  |
| 7704 | ZBTB16 | 51534  | C6orf55       | R  |

|      |         |        |           |   |
|------|---------|--------|-----------|---|
| 7704 | ZBTB16  | 51564  | HDAC7A    | L |
| 7704 | ZBTB16  | 54472  | TOLLIP    | S |
| 7704 | ZBTB16  | 54919  | FLJ20397  | S |
| 7704 | ZBTB16  | 55013  | FLJ20647  | S |
| 7704 | ZBTB16  | 55068  | FLJ10094  | R |
| 7704 | ZBTB16  | 55258  | FLJ10916  | S |
| 7704 | ZBTB16  | 55339  | WDR33     | S |
| 7704 | ZBTB16  | 55629  | PNRC2     | S |
| 7704 | ZBTB16  | 55646  | LYAR      | S |
| 7704 | ZBTB16  | 55722  | Cep72     | R |
| 7704 | ZBTB16  | 57670  | KIAA1549  | S |
| 7704 | ZBTB16  | 57819  | LSM2      | S |
| 7704 | ZBTB16  | 80321  | Cep70     | R |
| 7704 | ZBTB16  | 81576  | MGC10471  | S |
| 7704 | ZBTB16  | 81890  | QTRT1     | S |
| 7704 | ZBTB16  | 83755  | KRTAP4-12 | R |
| 7704 | ZBTB16  | 114783 | LMTK3     | S |
| 7704 | ZBTB16  | 192111 | MGC5352   | S |
| 7704 | ZBTB16  | 359845 | MGC45871  | S |
| 7706 | TRIM25  | 9246   | UBE2L6    | L |
| 7707 | ZNF148  | 284119 | PTRF      | L |
| 7709 | ZBTB17  | 11073  | TOPBP1    | L |
| 7709 | ZBTB17  | 22894  | KIAA1008  | L |
| 7718 | ZNF165  | 9260   | PDLIM7    | R |
| 7718 | ZNF165  | 11007  | DIPA      | R |
| 7718 | ZNF165  | 11143  | MYST2     | R |
| 7718 | ZNF165  | 51224  | TCEB3B    | R |
| 7718 | ZNF165  | 51282  | SCAND1    | R |
| 7718 | ZNF165  | 55663  | ZNF446    | R |
| 7718 | ZNF165  | 58500  | ZNF250    | R |
| 7718 | ZNF165  | 81576  | MGC10471  | R |
| 7718 | ZNF165  | 83755  | KRTAP4-12 | R |
| 7718 | ZNF165  | 220108 | FLJ30707  | R |
| 7746 | ZNF193  | 55663  | ZNF446    | R |
| 7750 | ZNF198  | 57473  | GM632     | L |
| 7750 | ZNF198  | 79753  | SNIP1     | L |
| 7753 | ZNF202  | 25888  | ZNF473    | R |
| 7755 | ZNF205  | 10241  | NDP52     | R |
| 7755 | ZNF205  | 11007  | DIPA      | R |
| 7763 | ZA20D2  | 8517   | IKBKG     | L |
| 7775 | ZNF232  | 55663  | ZNF446    | R |
| 7784 | ZP3     | 64772  | FLJ21865  | L |
| 7786 | MAP3K12 | 8848   | TSC22D1   | S |
| 7786 | MAP3K12 | 118924 | C10orf4   | S |
| 7786 | MAP3K12 | 200325 | (null)    | S |
| 7791 | ZYX     | 9113   | LATS1     | L |
| 7791 | ZYX     | 9501   | RPH3AL    | L |
| 7791 | ZYX     | 10114  | HIPK3     | L |
| 7791 | ZYX     | 10451  | VAV3      | L |
| 7791 | ZYX     | 10529  | NEBL      | L |
| 7802 | DNALI1  | 55324  | ABCF3     | S |
| 7803 | PTP4A1  | 11016  | ATF7      | L |
| 7804 | LRP8    | 9784   | SNX17     | L |
| 7805 | LAPTM5  | 8925   | HERC1     | L |
| 7805 | LAPTM5  | 8975   | USP13     | L |
| 7805 | LAPTM5  | 11059  | WWP1      | L |
| 7805 | LAPTM5  | 22905  | EPN2      | L |
| 7805 | LAPTM5  | 23327  | NEDD4L    | L |
| 7805 | LAPTM5  | 23462  | HEY1      | L |
| 7805 | LAPTM5  | 26508  | HEYL      | L |
| 7805 | LAPTM5  | 29924  | EPN1      | L |
| 7805 | LAPTM5  | 54165  | DCUN1D1   | L |
| 7805 | LAPTM5  | 55040  | EPN3      | L |
| 7805 | LAPTM5  | 64750  | SMURF2    | L |
| 7805 | LAPTM5  | 146691 | TOM1L2    | L |
| 7805 | LAPTM5  | 165918 | RNF168    | L |
| 7818 | DAP3    | 8772   | FADD      | L |



|      |        |       |           |   |
|------|--------|-------|-----------|---|
| 7818 | DAP3   | 8797  | TNFRSF10A | L |
| 7827 | NPHS2  | 23607 | CD2AP     | L |
| 7827 | NPHS2  | 55243 | KIRREL    | L |
| 7827 | NPHS2  | 84623 | KIRREL3   | L |
| 7832 | BTG2   | 9337  | CNOT8     | L |
| 7832 | BTG2   | 29883 | CNOT7     | L |
| 7837 | PXDN   | 9618  | TRAF4     | L |
| 7846 | TUBA3  | 8936  | WASF1     | L |
| 7846 | TUBA3  | 9672  | SDC3      | L |
| 7846 | TUBA3  | 83988 | NCALD     | L |
| 7851 | MALL   | 10488 | CREB3     | R |
| 7852 | CXCR4  | 9021  | SOCS3     | L |
| 7855 | FZD5   | 57120 | GOPC      | L |
| 7869 | SEMA3B | 8828  | NRP2      | L |
| 7869 | SEMA3B | 8829  | NRP1      | L |
| 7869 | SEMA3B | 10371 | SEMA3A    | L |
| 7874 | USP7   | 9618  | TRAF4     | L |
| 7874 | USP7   | 10010 | TANK      | L |
| 7879 | RAB7   | 10567 | RABAC1    | L |
| 7879 | RAB7   | 83547 | RILP      | L |
| 7884 | SLBP   | 9101  | USP8      | L |
| 7884 | SLBP   | 25888 | ZNF473    | L |
| 7884 | SLBP   | 90459 | THEX1     | L |
| 7913 | DEK    | 10250 | SRRM1     | L |
| 7913 | DEK    | 23524 | SRRM2     | L |
| 7916 | BAT2   | 8100  | TTC10     | L |
| 7916 | BAT2   | 8974  | P4HA2     | L |
| 7916 | BAT2   | 9898  | UBAP2L    | L |
| 7916 | BAT2   | 10459 | MAD2L2    | L |
| 7916 | BAT2   | 10989 | IMMT      | L |
| 7916 | BAT2   | 11218 | DDX20     | L |
| 7916 | BAT2   | 23193 | GANAB     | L |
| 7916 | BAT2   | 29894 | CPSF1     | L |
| 7917 | BAT3   | 8518  | IKBKAP    | S |
| 7917 | BAT3   | 8612  | PPAP2C    | S |
| 7917 | BAT3   | 9372  | ZFYVE9    | L |
| 7917 | BAT3   | 9804  | TOMM20    | S |
| 7917 | BAT3   | 9869  | SETDB1    | S |
| 7917 | BAT3   | 10094 | ARPC3     | S |
| 7917 | BAT3   | 10989 | IMMT      | S |
| 7917 | BAT3   | 23420 | NOMO1     | S |
| 7917 | BAT3   | 27043 | PELP1     | S |
| 7917 | BAT3   | 30008 | EFEMP2    | R |
| 7917 | BAT3   | 51726 | DNAJB11   | S |
| 7917 | BAT3   | 54464 | XRN1      | L |
| 7917 | BAT3   | 55603 | FAM46A    | L |
| 7917 | BAT3   | 55658 | RNF126    | L |
| 7917 | BAT3   | 55660 | FBNP3     | L |
| 7917 | BAT3   | 56005 | C19orf10  | S |
| 7917 | BAT3   | 59349 | KLHL12    | R |
| 7917 | BAT3   | 79948 | PRG2      | S |
| 7917 | BAT3   | 84223 | IQCG      | S |
| 7917 | BAT3   | 84993 | UBL7      | L |
| 7918 | BAT4   | 11007 | DIPA      | R |
| 7919 | BAT1   | 9063  | PIAS2     | L |
| 7919 | BAT1   | 10212 | DDX39     | L |
| 7919 | BAT1   | 10381 | TUBB3     | S |
| 7919 | BAT1   | 11244 | ZHX1      | L |
| 7919 | BAT1   | 29888 | STRN4     | S |
| 7919 | BAT1   | 85406 | DNAJC14   | L |
| 7919 | BAT1   | 92906 | HNRPLL    | L |
| 7920 | BAT5   | 8519  | IFITM1    | L |
| 7920 | BAT5   | 9552  | SPAG7     | L |
| 7920 | BAT5   | 10430 | NIFIE14   | L |
| 7920 | BAT5   | 29990 | PILRB     | L |
| 7920 | BAT5   | 55890 | GPRC5C    | L |
| 7920 | BAT5   | 64215 | DNAJC1    | L |

|      |         |        |           |    |
|------|---------|--------|-----------|----|
| 7920 | BAT5    | 84065  | C1orf160  | L  |
| 7936 | RDBP    | 9341   | VAMP3     | S  |
| 7936 | RDBP    | 9611   | NCOR1     | L  |
| 7936 | RDBP    | 25920  | COBRA1    | L  |
| 7940 | LST1    | 55632  | KIAA1333  | L  |
| 7942 | TFEB    | 22797  | TFEC      | L  |
| 7957 | EPM2A   | 9852   | EPM2AIP1  | L  |
| 7965 | JTV1    | 8880   | FUBP1     | L  |
| 7965 | JTV1    | 55885  | LMO3      | R  |
| 7965 | JTV1    | 79173  | MGC11271  | R  |
| 7965 | JTV1    | 84708  | LNX       | R  |
| 7965 | JTV1    | 220766 | KIAA0470L | R  |
| 7975 | MAFK    | 9586   | CREB5     | L  |
| 7975 | MAFK    | 9603   | NFE2L3    | L  |
| 7975 | MAFK    | 10488  | CREB3     | L  |
| 7975 | MAFK    | 11016  | ATF7      | L  |
| 7975 | MAFK    | 55509  | SNFT      | L  |
| 7975 | MAFK    | 60468  | BACH2     | L  |
| 7976 | FZD3    | 10755  | GIPC1     | L  |
| 7979 | SHFM1   | 55795  | FLJ11305  | R  |
| 7980 | TFPI2   | 64750  | SMURF2    | L  |
| 7982 | ST7     | 10399  | GNB2L1    | L  |
| 8021 | NUP214  | 10482  | NXF1      | L  |
| 8021 | NUP214  | 11260  | XPOT      | L  |
| 8021 | NUP214  | 11269  | DDX19B    | L  |
| 8021 | NUP214  | 56001  | NXF2      | L  |
| 8021 | NUP214  | 57122  | NUP107    | L  |
| 8021 | NUP214  | 57510  | XPO5      | L  |
| 8022 | LHX3    | 10370  | CITED2    | L  |
| 8022 | LHX3    | 26160  | SLB       | L  |
| 8022 | LHX3    | 64843  | ISL2      | L  |
| 8027 | STAM    | 9101   | USP8      | L  |
| 8027 | STAM    | 9146   | HGS       | RL |
| 8027 | STAM    | 10617  | STAMPB    | L  |
| 8028 | MLLT10  | 8089   | YEATS4    | L  |
| 8028 | MLLT10  | 84220  | RANBP2L1  | L  |
| 8031 | NCOA4   | 8850   | PCAF      | L  |
| 8031 | NCOA4   | 9604   | RNF14     | L  |
| 8048 | CSRP3   | 197257 | LDHD      | L  |
| 8061 | FOSL1   | 9586   | CREB5     | L  |
| 8061 | FOSL1   | 9935   | MAFB      | L  |
| 8061 | FOSL1   | 11016  | ATF7      | L  |
| 8061 | FOSL1   | 23641  | LDOC1     | R  |
| 8061 | FOSL1   | 57658  | CALCOCO1  | R  |
| 8065 | CUL5    | 9616   | RNF7      | L  |
| 8078 | USP5    | 10474  | TADA3L    | R  |
| 8078 | USP5    | 26994  | RNF11     | L  |
| 8087 | FXR1    | 11098  | PRSS23    | S  |
| 8087 | FXR1    | 11161  | C14orf1   | S  |
| 8087 | FXR1    | 26999  | CYFIP2    | L  |
| 8087 | FXR1    | 51631  | LUC7L2    | S  |
| 8087 | FXR1    | 55791  | C1orf103  | S  |
| 8087 | FXR1    | 57562  | KIAA1377  | S  |
| 8089 | YEATS4  | 10579  | TACC2     | L  |
| 8091 | HMGA2   | 10401  | PIAS3     | L  |
| 8092 | CART1   | 9670   | IPO13     | R  |
| 8092 | CART1   | 60529  | ALX4      | L  |
| 8099 | CDK2AP1 | 10263  | CDK2AP2   | L  |
| 8106 | PABPN1  | 22938  | SNW1      | L  |
| 8115 | TCL1A   | 10000  | AKT3      | L  |
| 8115 | TCL1A   | 10241  | NDP52     | R  |
| 8115 | TCL1A   | 92815  | HIST3H2A  | R  |
| 8120 | AP3B2   | 11033  | CENTA1    | L  |
| 8125 | ANP32A  | 8312   | AXIN1     | S  |
| 8125 | ANP32A  | 8988   | HSPB3     | S  |
| 8125 | ANP32A  | 11033  | CENTA1    | L  |
| 8125 | ANP32A  | 55968  | NSFL1C    | S  |

|      |           |        |          |   |
|------|-----------|--------|----------|---|
| 8153 | RND2      | 27183  | VPS4A    | L |
| 8153 | RND2      | 29127  | RACGAP1  | L |
| 8153 | RND2      | 91544  | UBXD5    | L |
| 8161 | COIL      | 9221   | NOLC1    | L |
| 8165 | AKAP1     | 26292  | MYCBP    | L |
| 8165 | AKAP1     | 89876  | C3orf15  | L |
| 8175 | SF3A2     | 10946  | SF3A3    | L |
| 8175 | SF3A2     | 27336  | HTATSF1  | L |
| 8175 | SF3A2     | 56729  | RETN     | L |
| 8175 | SF3A2     | 64750  | SMURF2   | L |
| 8178 | ELL       | 55840  | EAF2     | L |
| 8192 | CLPP      | 10845  | CLPX     | L |
| 8202 | NCOA3     | 8850   | PCAF     | L |
| 8202 | NCOA3     | 9612   | NCOR2    | L |
| 8202 | NCOA3     | 51684  | SUFU     | L |
| 8204 | NRIP1     | 8764   | TNFRSF14 | L |
| 8204 | NRIP1     | 8850   | PCAF     | L |
| 8204 | NRIP1     | 10062  | NR1H3    | L |
| 8204 | NRIP1     | 11007  | DIPA     | R |
| 8204 | NRIP1     | 23641  | LDOC1    | R |
| 8204 | NRIP1     | 56159  | TEX11    | R |
| 8204 | NRIP1     | 80321  | Cep70    | R |
| 8208 | CHAF1B    | 10036  | CHAF1A   | L |
| 8209 | C21orf33  | 118924 | C10orf4  | S |
| 8218 | CLTCL1    | 8301   | PICALM   | L |
| 8227 | DXYS155E  | 11007  | DIPA     | R |
| 8227 | DXYS155E  | 22981  | KIAA0980 | R |
| 8237 | USP11     | 9869   | SETDB1   | S |
| 8237 | USP11     | 10048  | RANBP9   | L |
| 8237 | USP11     | 10607  | TBL3     | S |
| 8241 | RBM10     | 58155  | PTBP2    | R |
| 8241 | RBM10     | 220108 | FLJ30707 | R |
| 8243 | SMC1L1    | 10403  | KNTC2    | L |
| 8260 | ARD1A     | 10919  | EHMT2    | R |
| 8289 | ARID1A    | 9031   | BAZ1B    | L |
| 8290 | HIST3H3   | 8445   | DYRK2    | L |
| 8290 | HIST3H3   | 8479   | HIRIP3   | L |
| 8290 | HIST3H3   | 23569  | PADI4    | L |
| 8290 | HIST3H3   | 30836  | ERBP     | L |
| 8290 | HIST3H3   | 54822  | TRPM7    | L |
| 8301 | PICALM    | 30846  | EHD2     | L |
| 8310 | ACOX3     | 64750  | SMURF2   | L |
| 8312 | AXIN1     | 8440   | NCK1     | L |
| 8312 | AXIN1     | 10813  | UTP14A   | S |
| 8312 | AXIN1     | 59343  | SENP2    | L |
| 8313 | AXIN2     | 22881  | ANKRD6   | L |
| 8317 | CDC7      | 10926  | ASK      | L |
| 8317 | CDC7      | 23594  | ORC6L    | L |
| 8317 | CDC7      | 55388  | MCM10    | L |
| 8318 | CDC45L    | 23595  | ORC3L    | L |
| 8318 | CDC45L    | 55388  | MCM10    | L |
| 8321 | FZD1      | 89780  | WNT3A    | L |
| 8324 | FZD7      | 29979  | UBQLN1   | R |
| 8325 | FZD8      | 57120  | GOPC     | L |
| 8338 | HIST2H2AC | 30836  | ERBP     | L |
| 8341 | HIST1H2BN | 56647  | BCCIP    | R |
| 8349 | HIST2H2BE | 8445   | DYRK2    | L |
| 8349 | HIST2H2BE | 8479   | HIRIP3   | L |
| 8349 | HIST2H2BE | 30836  | ERBP     | L |
| 8359 | HIST1H4A  | 8479   | HIRIP3   | L |
| 8379 | MAD1L1    | 10403  | KNTC2    | L |
| 8379 | MAD1L1    | 22981  | KIAA0980 | R |
| 8379 | MAD1L1    | 23309  | SIN3B    | L |
| 8379 | MAD1L1    | 23650  | TRIM29   | R |
| 8379 | MAD1L1    | 25942  | SIN3A    | L |
| 8379 | MAD1L1    | 27229  | 76P      | R |
| 8379 | MAD1L1    | 51421  | AMOTL2   | R |

|      |         |        |           |   |
|------|---------|--------|-----------|---|
| 8379 | MAD1L1  | 56159  | TEX11     | R |
| 8379 | MAD1L1  | 348487 | C1orf117  | R |
| 8382 | NME5    | 84332  | MGC16186  | R |
| 8382 | NME5    | 143241 | DYDC1     | R |
| 8394 | PIP5K1A | 8618   | CADPS     | S |
| 8399 | PLA2G10 | 22925  | PLA2R1    | L |
| 8405 | SPOP    | 10313  | RTN3      | R |
| 8405 | SPOP    | 151871 | DPPA2     | R |
| 8409 | UXT     | 8725   | C19orf2   | L |
| 8409 | UXT     | 10128  | LRPPRC    | L |
| 8409 | UXT     | 27257  | LSM1      | L |
| 8409 | UXT     | 27443  | CECR2     | L |
| 8411 | EEA1    | 8615   | VDP       | L |
| 8411 | EEA1    | 23673  | STX12     | L |
| 8411 | EEA1    | 57403  | RAB22A    | L |
| 8416 | ANXA9   | 55160  | ARHGEF10L | S |
| 8416 | ANXA9   | 56901  | LOC56901  | S |
| 8417 | STX7    | 8673   | VAMP8     | L |
| 8417 | STX7    | 8775   | NAPA      | L |
| 8417 | STX7    | 10228  | STX6      | L |
| 8417 | STX7    | 57617  | VPS18     | L |
| 8424 | BBOX1   | 8988   | HSPB3     | S |
| 8428 | STK24   | 11235  | PDCD10    | R |
| 8431 | NR0B2   | 9970   | NR1I3     | L |
| 8431 | NR0B2   | 10062  | NR1H3     | L |
| 8436 | SDPR    | 79666  | PLEKHF2   | R |
| 8436 | SDPR    | 79873  | NUDT18    | R |
| 8439 | NSMAF   | 10399  | GNB2L1    | L |
| 8440 | NCK2    | 9513   | FXR2      | R |
| 8440 | NCK2    | 10006  | ABI1      | L |
| 8440 | NCK2    | 10152  | ABI2      | R |
| 8440 | NCK2    | 10262  | SF3B4     | R |
| 8440 | NCK2    | 11052  | CPSF6     | R |
| 8440 | NCK2    | 51517  | NCKIPSD   | R |
| 8440 | NCK2    | 51729  | WBP11     | R |
| 8440 | NCK2    | 56243  | KIAA1217  | R |
| 8440 | NCK2    | 79869  | FLJ12529  | R |
| 8443 | GNPAT   | 8540   | AGPS      | L |
| 8443 | GNPAT   | 11021  | RAB35     | S |
| 8445 | DYRK2   | 25788  | RAD54B    | R |
| 8446 | DUSP11  | 8683   | SFRS9     | L |
| 8447 | DOC2B   | 10497  | UNC13B    | L |
| 8448 | DOC2A   | 10497  | UNC13B    | L |
| 8450 | CUL4B   | 55832  | CAND1     | L |
| 8451 | CUL4A   | 9616   | RNF7      | L |
| 8451 | CUL4A   | 9978   | RBX1      | L |
| 8452 | CUL3    | 9978   | RBX1      | L |
| 8453 | CUL2    | 9616   | RNF7      | L |
| 8454 | CUL1    | 9616   | RNF7      | L |
| 8454 | CUL1    | 9978   | RBX1      | L |
| 8454 | CUL1    | 83461  | CDCA3     | L |
| 8454 | CUL1    | 84893  | FBXO18    | L |
| 8458 | TTF2    | 9782   | MATR3     | L |
| 8458 | TTF2    | 10015  | PDCD6IP   | L |
| 8458 | TTF2    | 10460  | TACC3     | L |
| 8458 | TTF2    | 10549  | PRDX4     | L |
| 8458 | TTF2    | 10589  | DRAP1     | L |
| 8458 | TTF2    | 24137  | KIF4A     | L |
| 8458 | TTF2    | 55802  | DCP1A     | L |
| 8462 | KLF11   | 25942  | SIN3A     | L |
| 8463 | TEAD2   | 8648   | NCOA1     | L |
| 8463 | TEAD2   | 10413  | YAP1      | L |
| 8467 | SMARCA5 | 9031   | BAZ1B     | L |
| 8467 | SMARCA5 | 11176  | BAZ2A     | L |
| 8467 | SMARCA5 | 54108  | CHRAC1    | L |
| 8467 | SMARCA5 | 80012  | PHC3      | L |
| 8468 | FKBP6   | 8812   | CCNK      | R |

|      |          |        |           |   |
|------|----------|--------|-----------|---|
| 8468 | FKBP6    | 29922  | NME7      | R |
| 8470 | SORBS2   | 9618   | TRAF4     | L |
| 8471 | IRS4     | 9306   | SOCS6     | L |
| 8471 | IRS4     | 11188  | NISCH     | L |
| 8473 | OGT      | 22906  | OIP106    | L |
| 8473 | OGT      | 54830  | FLJ20130  | R |
| 8473 | OGT      | 66008  | ALS2CR3   | L |
| 8479 | HIRIP3   | 55324  | ABCF3     | S |
| 8480 | RAE1     | 57062  | DDX24     | S |
| 8481 | OFD1     | 9737   | GPRASP1   | S |
| 8481 | OFD1     | 51631  | LUC7L2    | S |
| 8481 | OFD1     | 54462  | KIAA1128  | S |
| 8481 | OFD1     | 57562  | KIAA1377  | S |
| 8482 | SEMA7A   | 10154  | PLXNC1    | L |
| 8487 | SIP1     | 11338  | U2AF2     | L |
| 8495 | PPFIBP2  | 8499   | PPFIA2    | L |
| 8495 | PPFIBP2  | 8500   | PPFIA1    | L |
| 8495 | PPFIBP2  | 8541   | PPFIA3    | L |
| 8496 | PPFIBP1  | 8499   | PPFIA2    | L |
| 8496 | PPFIBP1  | 8500   | PPFIA1    | L |
| 8496 | PPFIBP1  | 8541   | PPFIA3    | L |
| 8499 | PPFIA2   | 8500   | PPFIA1    | L |
| 8499 | PPFIA2   | 8541   | PPFIA3    | L |
| 8499 | PPFIA2   | 26059  | CAST1     | L |
| 8499 | PPFIA2   | 28964  | GIT1      | L |
| 8500 | PPFIA1   | 8541   | PPFIA3    | L |
| 8500 | PPFIA1   | 10499  | NCOA2     | L |
| 8500 | PPFIA1   | 23085  | RAB6IP2   | L |
| 8500 | PPFIA1   | 26059  | CAST1     | L |
| 8500 | PPFIA1   | 28964  | GIT1      | L |
| 8500 | PPFIA1   | 51562  | MBIP      | R |
| 8502 | PKP4     | 11337  | GABARAP   | S |
| 8502 | PKP4     | 23037  | PDZK3     | L |
| 8502 | PKP4     | 55914  | ERBB2IP   | L |
| 8503 | PIK3R3   | 10589  | DRAP1     | R |
| 8506 | CNTNAP1  | 57142  | RTN4      | L |
| 8508 | NIPSNAP1 | 79735  | TBC1D17   | S |
| 8517 | IKBKG    | 8533   | COPS3     | L |
| 8517 | IKBKG    | 8737   | RIPK1     | L |
| 8517 | IKBKG    | 8767   | RIPK2     | L |
| 8517 | IKBKG    | 8915   | BCL10     | L |
| 8517 | IKBKG    | 9020   | MAP3K14   | L |
| 8517 | IKBKG    | 9230   | RAB11B    | L |
| 8517 | IKBKG    | 10010  | TANK      | L |
| 8517 | IKBKG    | 10758  | TRAF3IP2  | L |
| 8517 | IKBKG    | 11140  | CDC37     | L |
| 8517 | IKBKG    | 26133  | TRPC4AP   | L |
| 8517 | IKBKG    | 26994  | RNF11     | L |
| 8517 | IKBKG    | 257397 | TAB3      | L |
| 8518 | IKBKAP   | 9020   | MAP3K14   | L |
| 8518 | IKBKAP   | 10190  | TXNDC9    | S |
| 8518 | IKBKAP   | 23557  | SNAPAP    | S |
| 8518 | IKBKAP   | 25934  | NIPSNAP3A | S |
| 8518 | IKBKAP   | 28977  | MRPL42    | S |
| 8518 | IKBKAP   | 54949  | FLJ20487  | S |
| 8518 | IKBKAP   | 55140  | ELP3      | L |
| 8525 | DGKZ     | 10125  | RASGRP1   | L |
| 8525 | DGKZ     | 54212  | SNTG1     | L |
| 8525 | DGKZ     | 81488  | GRINL1A   | S |
| 8527 | DGKD     | 10456  | HAX1      | S |
| 8527 | DGKD     | 84966  | IGSF21    | S |
| 8527 | DGKD     | 160851 | DGKH      | L |
| 8533 | COPS3    | 55805  | LRP2BP    | L |
| 8536 | CAMK1    | 10645  | CAMKK2    | L |
| 8541 | PPFIA3   | 10076  | PTPRU     | L |
| 8541 | PPFIA3   | 26059  | CAST1     | L |
| 8541 | PPFIA3   | 28964  | GIT1      | L |

|      |          |        |            |   |
|------|----------|--------|------------|---|
| 8543 | LMO4     | 8861   | LDB1       | L |
| 8543 | LMO4     | 9079   | LDB2       | L |
| 8543 | LMO4     | 9371   | KIF3B      | L |
| 8543 | LMO4     | 9871   | SEC24D     | L |
| 8543 | LMO4     | 10461  | MERTK      | L |
| 8543 | LMO4     | 23760  | PITPNB     | L |
| 8543 | LMO4     | 64129  | TINAGL1    | L |
| 8543 | LMO4     | 116461 | C1orf19    | L |
| 8543 | LMO4     | 171392 | ZNF675     | L |
| 8546 | AP3B1    | 10239  | AP3S2      | L |
| 8553 | BHLHB2   | 9869   | SETDB1     | S |
| 8553 | BHLHB2   | 11244  | ZHX1       | S |
| 8554 | PIAS1    | 55660  | FNBP3      | L |
| 8554 | PIAS1    | 79753  | SNIP1      | L |
| 8555 | CDC14B   | 22933  | SIRT2      | L |
| 8556 | CDC14A   | 51343  | FZR1       | L |
| 8557 | TCAP     | 58529  | MYOZ1      | L |
| 8562 | DENR     | 28985  | MCTS1      | S |
| 8567 | MADD     | 55367  | LRDD       | L |
| 8569 | MKNK1    | 8672   | EIF4G3     | L |
| 8570 | KHSRP    | 8880   | FUBP1      | L |
| 8570 | KHSRP    | 23404  | EXOSC2     | L |
| 8570 | KHSRP    | 29974  | ACF        | L |
| 8570 | KHSRP    | 51010  | EXOSC3     | L |
| 8572 | PDLIM4   | 11030  | RBPMS      | R |
| 8572 | PDLIM4   | 79797  | ZNF408     | L |
| 8573 | CASK     | 8825   | LIN7A      | L |
| 8573 | CASK     | 9369   | NRXN3      | L |
| 8573 | CASK     | 10716  | TBR1       | L |
| 8573 | CASK     | 22895  | RPH3A      | L |
| 8573 | CASK     | 23705  | IGSF4      | L |
| 8573 | CASK     | 25861  | DFNB31     | L |
| 8573 | CASK     | 25865  | PRKD2      | L |
| 8573 | CASK     | 26047  | CNTNAP2    | L |
| 8573 | CASK     | 57524  | CASKIN1    | L |
| 8573 | CASK     | 64061  | TSPYL2     | L |
| 8574 | AKR7A2   | 22977  | AKR7A3     | R |
| 8575 | PRKRA    | 9869   | SETDB1     | S |
| 8575 | PRKRA    | 10980  | COPS6      | S |
| 8576 | STK16    | 22934  | RPIA       | R |
| 8576 | STK16    | 54507  | TSRC1      | R |
| 8576 | STK16    | 79734  | KCTD17     | R |
| 8600 | TNFSF11  | 8792   | TNFRSF11A  | L |
| 8601 | RGS20    | 11075  | STMN2      | L |
| 8601 | RGS20    | 28962  | OSTM1      | L |
| 8607 | RUVBL1   | 51602  | NOP5/NOP58 | L |
| 8607 | RUVBL1   | 57562  | KIAA1377   | S |
| 8609 | KLF7     | 81545  | FBXO38     | L |
| 8612 | PPAP2C   | 9094   | UNC119     | S |
| 8614 | STC2     | 8891   | EIF2B3     | S |
| 8614 | STC2     | 9131   | PDCD8      | S |
| 8614 | STC2     | 10621  | POLR3F     | S |
| 8614 | STC2     | 23589  | CARHSP1    | S |
| 8614 | STC2     | 55701  | FLJ10357   | S |
| 8615 | VDP      | 9527   | GOSR1      | L |
| 8615 | VDP      | 9570   | GOSR2      | L |
| 8615 | VDP      | 84970  | C1orf94    | R |
| 8618 | CADPS    | 51631  | LUC7L2     | S |
| 8621 | CDC2L5   | 55660  | FNBP3      | L |
| 8626 | TP73L    | 28996  | HIPK2      | L |
| 8633 | UNC5C    | 9423   | NTN1       | L |
| 8637 | EIF4EBP3 | 9470   | EIF4E2     | R |
| 8642 | DCHS1    | 222019 | (null)     | S |
| 8643 | PTCH2    | 50846  | DHH        | L |
| 8644 | AKR1C3   | 11244  | ZHX1       | S |
| 8644 | AKR1C3   | 22985  | ACIN1      | S |
| 8644 | AKR1C3   | 55284  | UBE2W      | S |

|      |           |        |          |   |
|------|-----------|--------|----------|---|
| 8644 | AKR1C3    | 55791  | C1orf103 | S |
| 8646 | CHRD      | 57045  | TWSG1    | L |
| 8648 | NCOA1     | 8850   | PCAF     | L |
| 8648 | NCOA1     | 8856   | NR1I2    | L |
| 8648 | NCOA1     | 9325   | TRIP4    | L |
| 8648 | NCOA1     | 9971   | NR1H4    | L |
| 8648 | NCOA1     | 10499  | NCOA2    | L |
| 8648 | NCOA1     | 10521  | DDX17    | L |
| 8648 | NCOA1     | 10987  | COPS5    | L |
| 8649 | MAP2K1IP1 | 51684  | SUFU     | L |
| 8650 | NUMB      | 83737  | ITCH     | L |
| 8650 | NUMB      | 222484 | LNX2     | L |
| 8651 | SOCS1     | 81603  | TRIM8    | L |
| 8655 | DNCL1     | 9112   | MTA1     | L |
| 8655 | DNCL1     | 10018  | BCL2L11  | L |
| 8655 | DNCL1     | 10243  | GPHN     | L |
| 8655 | DNCL1     | 10383  | TUBB2    | L |
| 8655 | DNCL1     | 10771  | ZMYND11  | L |
| 8655 | DNCL1     | 11161  | C14orf1  | S |
| 8655 | DNCL1     | 11244  | ZHX1     | S |
| 8655 | DNCL1     | 56288  | PARD3    | L |
| 8655 | DNCL1     | 56901  | LOC56901 | S |
| 8655 | DNCL1     | 57619  | SHRM     | L |
| 8655 | DNCL1     | 84817  | TXNL5    | L |
| 8655 | DNCL1     | 199745 | THAP8    | S |
| 8658 | TNKS      | 23048  | FNBP1    | L |
| 8658 | TNKS      | 25913  | POT1     | L |
| 8658 | TNKS      | 80351  | TNKS2    | L |
| 8658 | TNKS      | 85456  | TNKS1BP1 | L |
| 8661 | EIF3S10   | 8662   | EIF3S9   | L |
| 8661 | EIF3S10   | 8666   | EIF3S4   | L |
| 8661 | EIF3S10   | 8668   | EIF3S2   | L |
| 8661 | EIF3S10   | 8669   | EIF3S1   | L |
| 8661 | EIF3S10   | 27335  | EIF3S12  | L |
| 8663 | EIF3S8    | 8666   | EIF3S4   | L |
| 8663 | EIF3S8    | 8669   | EIF3S1   | L |
| 8663 | EIF3S8    | 56901  | LOC56901 | S |
| 8663 | EIF3S8    | 79719  | FLJ11506 | S |
| 8663 | EIF3S8    | 79753  | SNIP1    | L |
| 8664 | EIF3S7    | 8666   | EIF3S4   | L |
| 8664 | EIF3S7    | 8669   | EIF3S1   | L |
| 8664 | EIF3S7    | 22822  | PHLDA1   | L |
| 8664 | EIF3S7    | 51386  | EIF3S6IP | L |
| 8665 | EIF3S5    | 10456  | HAX1     | R |
| 8665 | EIF3S5    | 10480  | hfl-B5   | S |
| 8665 | EIF3S5    | 23097  | CDC2L6   | L |
| 8666 | EIF3S4    | 8667   | EIF3S3   | L |
| 8666 | EIF3S4    | 10200  | MPHOSPH6 | L |
| 8666 | EIF3S4    | 51678  | MPP6     | L |
| 8667 | EIF3S3    | 11007  | DIPA     | R |
| 8667 | EIF3S3    | 27185  | DISC1    | L |
| 8667 | EIF3S3    | 51225  | ABI3     | R |
| 8668 | EIF3S2    | 118460 | EXOSC6   | L |
| 8669 | EIF3S1    | 9500   | MAGED1   | S |
| 8669 | EIF3S1    | 10474  | TADA3L   | S |
| 8669 | EIF3S1    | 10681  | GNB5     | S |
| 8669 | EIF3S1    | 51280  | GOLPH2   | S |
| 8671 | SLC4A4    | 9497   | SLC4A7   | L |
| 8673 | VAMP8     | 8773   | SNAP23   | L |
| 8673 | VAMP8     | 8775   | NAPA     | L |
| 8674 | VAMP4     | 8675   | STX16    | L |
| 8674 | VAMP4     | 8907   | AP1M1    | L |
| 8674 | VAMP4     | 10228  | STX6     | L |
| 8674 | VAMP4     | 55690  | PACS1    | L |
| 8675 | STX16     | 9341   | VAMP3    | L |
| 8675 | STX16     | 10228  | STX6     | L |
| 8676 | STX11     | 8724   | SNX3     | S |

|      |          |        |              |    |
|------|----------|--------|--------------|----|
| 8676 | STX11    | 8773   | SNAP23       | RL |
| 8676 | STX11    | 8812   | CCNK         | R  |
| 8676 | STX11    | 10629  | TAF6L        | R  |
| 8676 | STX11    | 54407  | SLC38A2      | S  |
| 8676 | STX11    | 79036  | MGC2749      | R  |
| 8678 | BECN1    | 57120  | GOPC         | L  |
| 8682 | PEA15    | 8772   | FADD         | L  |
| 8682 | PEA15    | 51631  | LUC7L2       | S  |
| 8682 | PEA15    | 55229  | PANK4        | S  |
| 8682 | PEA15    | 221264 | C6orf199     | S  |
| 8682 | PEA15    | 380789 | (null)       | S  |
| 8683 | SFRS9    | 8996   | NOL3         | L  |
| 8683 | SFRS9    | 10656  | KHDRBS3      | L  |
| 8683 | SFRS9    | 91746  | YT521        | L  |
| 8685 | MARCO    | 92304  | SCGB3A1      | L  |
| 8685 | MARCO    | 117156 | SCGB3A2      | L  |
| 8697 | CDC23    | 11030  | RBPMS        | R  |
| 8697 | CDC23    | 25788  | RAD54B       | R  |
| 8697 | CDC23    | 81628  | TSC22D4      | R  |
| 8698 | EDG6     | 10672  | GNA13        | L  |
| 8703 | B4GALT3  | 54622  | ARFRP2       | S  |
| 8705 | B3GALT4  | 11269  | DDX19B       | S  |
| 8715 | NOL4     | 10302  | SNAPC5       | R  |
| 8717 | TRADD    | 8718   | TNFRSF25     | L  |
| 8717 | TRADD    | 8737   | RIPK1        | L  |
| 8717 | TRADD    | 8772   | FADD         | L  |
| 8717 | TRADD    | 8795   | TNFRSF10B    | L  |
| 8717 | TRADD    | 8797   | TNFRSF10A    | L  |
| 8717 | TRADD    | 8915   | BCL10        | L  |
| 8717 | TRADD    | 11064  | CEP1         | L  |
| 8717 | TRADD    | 26133  | TRPC4AP      | L  |
| 8717 | TRADD    | 26136  | TES          | L  |
| 8717 | TRADD    | 27242  | TNFRSF21     | L  |
| 8717 | TRADD    | 28996  | HIPK2        | L  |
| 8718 | TNFRSF25 | 8742   | TNFSF12      | L  |
| 8718 | TNFRSF25 | 9530   | BAG4         | L  |
| 8718 | TNFRSF25 | 9966   | TNFSF15      | L  |
| 8721 | EDF1     | 10062  | NR1H3        | L  |
| 8723 | SNX4     | 55750  | MULK         | S  |
| 8726 | EED      | 8841   | HDAC3        | L  |
| 8726 | EED      | 96764  | NCOA6IP      | L  |
| 8727 | CTNNAL1  | 11214  | AKAP13       | L  |
| 8728 | ADAM19   | 10152  | ABI2         | L  |
| 8728 | ADAM19   | 51575  | C20orf6      | L  |
| 8731 | RNMT     | 8732   | RNGTT        | L  |
| 8733 | GPAA1    | 10026  | PIGK         | L  |
| 8733 | GPAA1    | 54458  | DKFZp564J157 | S  |
| 8735 | MYH13    | 51690  | LSM7         | L  |
| 8737 | RIPK1    | 8738   | CRADD        | L  |
| 8737 | RIPK1    | 8772   | FADD         | L  |
| 8737 | RIPK1    | 8795   | TNFRSF10B    | L  |
| 8737 | RIPK1    | 8797   | TNFRSF10A    | L  |
| 8737 | RIPK1    | 8837   | CFLAR        | L  |
| 8737 | RIPK1    | 8878   | SQSTM1       | L  |
| 8737 | RIPK1    | 9020   | MAP3K14      | L  |
| 8737 | RIPK1    | 10475  | TRIM38       | L  |
| 8737 | RIPK1    | 11035  | RIPK3        | L  |
| 8737 | RIPK1    | 26133  | TRPC4AP      | L  |
| 8738 | CRADD    | 11161  | C14orf1      | S  |
| 8738 | CRADD    | 54462  | KIAA1128     | S  |
| 8738 | CRADD    | 55367  | LRDD         | L  |
| 8738 | CRADD    | 55791  | C1orf103     | S  |
| 8740 | TNFSF14  | 8764   | TNFRSF14     | L  |
| 8740 | TNFSF14  | 8771   | TNFRSF6B     | L  |
| 8742 | TNFSF12  | 51330  | TNFRSF12A    | L  |
| 8742 | TNFSF12  | 55109  | AGGF1        | L  |
| 8743 | TNFSF10  | 8793   | TNFRSF10D    | L  |



|      |           |        |                 |   |
|------|-----------|--------|-----------------|---|
| 8743 | TNFSF10   | 8794   | TNFRSF10C       | L |
| 8743 | TNFSF10   | 8795   | TNFRSF10B       | L |
| 8743 | TNFSF10   | 8797   | TNFRSF10A       | L |
| 8743 | TNFSF10   | 84060  | DKFZP564O0523   | S |
| 8751 | ADAM15    | 9319   | TRIP13          | R |
| 8751 | ADAM15    | 51429  | SNX9            | L |
| 8754 | ADAM9     | 10459  | MAD2L2          | L |
| 8754 | ADAM9     | 51429  | SNX9            | L |
| 8761 | PABPC4    | 22822  | PHLDA1          | L |
| 8761 | PABPC4    | 54464  | XRN1            | L |
| 8764 | TNFRSF14  | 8841   | HDAC3           | L |
| 8764 | TNFRSF14  | 9759   | HDAC4           | L |
| 8764 | TNFRSF14  | 407977 | TNFSF12-TNFSF13 | L |
| 8766 | RAB11A    | 22841  | RAB11FIP2       | L |
| 8766 | RAB11A    | 26056  | RAB11FIP5       | L |
| 8766 | RAB11A    | 54521  | WDR44           | L |
| 8766 | RAB11A    | 80223  | RAB11FIP1       | L |
| 8766 | RAB11A    | 84440  | RAB11FIP4       | L |
| 8767 | RIPK2     | 8837   | CFLAR           | L |
| 8767 | RIPK2     | 10392  | CARD4           | L |
| 8767 | RIPK2     | 64127  | CARD15          | L |
| 8767 | RIPK2     | 84674  | CARD6           | L |
| 8771 | TNFRSF6B  | 9966   | TNFSF15         | L |
| 8772 | FADD      | 8795   | TNFRSF10B       | L |
| 8772 | FADD      | 8797   | TNFRSF10A       | L |
| 8772 | FADD      | 8837   | CFLAR           | L |
| 8772 | FADD      | 8930   | MBD4            | L |
| 8772 | FADD      | 9191   | DEDD            | L |
| 8772 | FADD      | 9994   | CASP8AP2        | L |
| 8772 | FADD      | 10114  | HIPK3           | L |
| 8772 | FADD      | 23429  | RYBP            | L |
| 8772 | FADD      | 25843  | PREI3           | S |
| 8772 | FADD      | 55367  | LRDD            | L |
| 8772 | FADD      | 57062  | DDX24           | S |
| 8772 | FADD      | 57510  | XPO5            | L |
| 8772 | FADD      | 85444  | LRRCC1          | S |
| 8773 | SNAP23    | 8775   | NAPA            | R |
| 8773 | SNAP23    | 9341   | VAMP3           | L |
| 8773 | SNAP23    | 9513   | FXR2            | R |
| 8773 | SNAP23    | 9522   | SCAMP1          | L |
| 8773 | SNAP23    | 10066  | SCAMP2          | L |
| 8773 | SNAP23    | 10152  | ABI2            | R |
| 8773 | SNAP23    | 10228  | STX6            | L |
| 8773 | SNAP23    | 10590  | SCGN            | R |
| 8773 | SNAP23    | 23557  | SNAPAP          | L |
| 8773 | SNAP23    | 23673  | STX12           | L |
| 8773 | SNAP23    | 51225  | ABI3            | R |
| 8773 | SNAP23    | 134957 | STXBP5          | L |
| 8774 | NAPG      | 9482   | STX8            | L |
| 8774 | NAPG      | 26056  | RAB11FIP5       | L |
| 8775 | NAPA      | 9482   | STX8            | L |
| 8775 | NAPA      | 9527   | GOSR1           | L |
| 8775 | NAPA      | 9570   | GOSR2           | L |
| 8775 | NAPA      | 23673  | STX12           | L |
| 8775 | NAPA      | 57142  | RTN4            | R |
| 8777 | MPDZ      | 9076   | CLDN1           | L |
| 8777 | MPDZ      | 10413  | YAP1            | L |
| 8777 | MPDZ      | 59338  | PLEKHA1         | L |
| 8778 | SIGLEC5   | 9319   | TRIP13          | R |
| 8784 | TNFRSF18  | 8995   | TNFSF18         | L |
| 8792 | TNFRSF11A | 23118  | MAP3K7IP2       | L |
| 8794 | TNFRSF10C | 11244  | ZHX1            | S |
| 8794 | TNFRSF10C | 28965  | SLC27A6         | S |
| 8794 | TNFRSF10C | 90678  | LRSAM1          | S |
| 8794 | TNFRSF10C | 359845 | MGC45871        | S |
| 8795 | TNFRSF10B | 8837   | CFLAR           | L |
| 8796 | SCEL      | 10628  | TXNIP           | L |

|      |           |        |           |   |
|------|-----------|--------|-----------|---|
| 8797 | TNFRSF10A | 8915   | BCL10     | L |
| 8805 | TRIM24    | 10155  | TRIM28    | L |
| 8805 | TRIM24    | 10951  | CBX1      | L |
| 8805 | TRIM24    | 11335  | CBX3      | L |
| 8805 | TRIM24    | 23468  | CBX5      | L |
| 8805 | TRIM24    | 51592  | TRIM33    | L |
| 8809 | IL18R1    | 27178  | IL1F7     | L |
| 8811 | GALR2     | 51083  | GAL       | L |
| 8812 | CCNK      | 10363  | HMG20A    | R |
| 8812 | CCNK      | 11007  | DIPA      | R |
| 8812 | CCNK      | 11030  | RBPMS     | R |
| 8812 | CCNK      | 30008  | EFEMP2    | R |
| 8812 | CCNK      | 54550  | EFCBP2    | R |
| 8812 | CCNK      | 79959  | C18orf9   | R |
| 8812 | CCNK      | 81628  | TSC22D4   | R |
| 8812 | CCNK      | 83755  | KRTAP4-12 | R |
| 8812 | CCNK      | 83878  | USHBP1    | R |
| 8812 | CCNK      | 84528  | PEPP-2    | R |
| 8812 | CCNK      | 222546 | RFXDC1    | R |
| 8812 | CCNK      | 283518 | KCNRG     | R |
| 8819 | SAP30     | 9541   | CIR       | L |
| 8819 | SAP30     | 9611   | NCOR1     | L |
| 8819 | SAP30     | 9612   | NCOR2     | L |
| 8820 | HESX1     | 9611   | NCOR1     | L |
| 8825 | LIN7A     | 10458  | BAIAP2    | L |
| 8825 | LIN7A     | 51678  | MPP6      | L |
| 8825 | LIN7A     | 64398  | MPP5      | L |
| 8826 | IQGAP1    | 9495   | AKAP5     | L |
| 8826 | IQGAP1    | 53405  | CLIC5     | L |
| 8829 | NRP1      | 10371  | SEMA3A    | L |
| 8829 | NRP1      | 10755  | GIPC1     | L |
| 8834 | TMEM11    | 22955  | SCMH1     | S |
| 8837 | CFLAR     | 9191   | DEDD      | L |
| 8837 | CFLAR     | 162989 | DEDD2     | L |
| 8841 | HDAC3     | 9063   | PIAS2     | L |
| 8841 | HDAC3     | 9569   | GTF2IRD1  | L |
| 8841 | HDAC3     | 9611   | NCOR1     | L |
| 8841 | HDAC3     | 9612   | NCOR2     | L |
| 8841 | HDAC3     | 9734   | HDAC9     | L |
| 8841 | HDAC3     | 9759   | HDAC4     | L |
| 8841 | HDAC3     | 10014  | HDAC5     | L |
| 8841 | HDAC3     | 22948  | CCT5      | L |
| 8841 | HDAC3     | 23118  | MAP3K7IP2 | L |
| 8841 | HDAC3     | 25942  | SIN3A     | L |
| 8841 | HDAC3     | 51564  | HDAC7A    | L |
| 8841 | HDAC3     | 55662  | HIF1AN    | L |
| 8841 | HDAC3     | 55806  | HR        | L |
| 8841 | HDAC3     | 83933  | HDAC10    | L |
| 8848 | TSC22D1   | 9869   | SETDB1    | S |
| 8848 | TSC22D1   | 10391  | CORO2B    | S |
| 8848 | TSC22D1   | 60492  | MDS025    | S |
| 8850 | PCAF      | 51621  | KLF13     | L |
| 8851 | CDK5R1    | 10763  | NES       | L |
| 8851 | CDK5R1    | 55755  | CDK5RAP2  | L |
| 8851 | CDK5R1    | 81628  | TSC22D4   | R |
| 8852 | AKAP4     | 10566  | AKAP3     | L |
| 8859 | STK19     | 10262  | SF3B4     | L |
| 8859 | STK19     | 23532  | PRAME     | L |
| 8861 | LDB1      | 23635  | SSBP2     | R |
| 8861 | LDB1      | 54472  | TOLLIP    | R |
| 8861 | LDB1      | 55885  | LMO3      | R |
| 8861 | LDB1      | 58190  | CTDSP1    | L |
| 8861 | LDB1      | 170463 | SSBP4     | R |
| 8863 | PER3      | 8864   | PER2      | L |
| 8863 | PER3      | 9575   | CLOCK     | L |
| 8864 | PER2      | 8914   | TIMELESS  | L |
| 8867 | SYNJ1     | 29763  | PACSIN3   | L |

|      |         |        |            |   |
|------|---------|--------|------------|---|
| 8867 | SYNJ1   | 29993  | PACSIN1    | L |
| 8871 | SYNJ2   | 50618  | ITSN2      | L |
| 8872 | C10orf7 | 57473  | GM632      | L |
| 8874 | ARHGEF7 | 9647   | PPM1F      | L |
| 8874 | ARHGEF7 | 9815   | GIT2       | L |
| 8874 | ARHGEF7 | 10381  | TUBB3      | S |
| 8874 | ARHGEF7 | 22941  | SHANK2     | L |
| 8874 | ARHGEF7 | 28964  | GIT1       | L |
| 8874 | ARHGEF7 | 50944  | SHANK1     | L |
| 8877 | SPHK1   | 26750  | RPS6KC1    | L |
| 8878 | SQSTM1  | 11345  | GABARAPL2  | R |
| 8878 | SQSTM1  | 23710  | GABARAPL1  | R |
| 8878 | SQSTM1  | 79686  | C14orf139  | S |
| 8878 | SQSTM1  | 81631  | MAP1LC3B   | S |
| 8878 | SQSTM1  | 114034 | TOE1       | S |
| 8880 | FUBP1   | 10658  | CUGBP1     | S |
| 8880 | FUBP1   | 10989  | IMMT       | L |
| 8882 | ZNF259  | 55755  | CDK5RAP2   | S |
| 8883 | APPBP1  | 9039   | UBE1C      | L |
| 8883 | APPBP1  | 56893  | UBQLN4     | S |
| 8886 | DDX18   | 9112   | MTA1       | S |
| 8886 | DDX18   | 10207  | INADL      | S |
| 8887 | TAX1BP1 | 26994  | RNF11      | L |
| 8887 | TAX1BP1 | 79735  | TBC1D17    | S |
| 8887 | TAX1BP1 | 90627  | STARD13    | L |
| 8888 | MCM3AP  | 11164  | NUDT5      | S |
| 8888 | MCM3AP  | 51259  | MGC13379   | S |
| 8888 | MCM3AP  | 56943  | ENY2       | S |
| 8890 | EIF2B4  | 8891   | EIF2B3     | L |
| 8890 | EIF2B4  | 8892   | EIF2B2     | L |
| 8890 | EIF2B4  | 8893   | EIF2B5     | L |
| 8890 | EIF2B4  | 8894   | EIF2S2     | L |
| 8891 | EIF2B3  | 8892   | EIF2B2     | L |
| 8891 | EIF2B3  | 8893   | EIF2B5     | L |
| 8891 | EIF2B3  | 51280  | GOLPH2     | S |
| 8892 | EIF2B2  | 8893   | EIF2B5     | L |
| 8893 | EIF2B5  | 8894   | EIF2S2     | L |
| 8894 | EIF2S2  | 9094   | UNC119     | S |
| 8894 | EIF2S2  | 9842   | PLEKHM1    | S |
| 8894 | EIF2S2  | 57562  | KIAA1377   | S |
| 8894 | EIF2S2  | 60492  | MDS025     | S |
| 8899 | PRPF4B  | 8988   | HSPB3      | S |
| 8899 | PRPF4B  | 10621  | POLR3F     | S |
| 8900 | CCNA1   | 10399  | GNB2L1     | L |
| 8900 | CCNA1   | 126823 | KARCA1     | L |
| 8900 | CCNA1   | 147011 | PROCA1     | L |
| 8900 | CCNA1   | 196528 | ARID2      | L |
| 8900 | CCNA1   | 388324 | INCA1      | L |
| 8904 | CPNE1   | 9040   | UBE2M      | L |
| 8904 | CPNE1   | 10016  | PDCD6      | L |
| 8904 | CPNE1   | 26292  | MYCBP      | L |
| 8904 | CPNE1   | 28952  | CCDC22     | L |
| 8904 | CPNE1   | 54880  | BCOR       | L |
| 8904 | CPNE1   | 57605  | PITPNM2    | L |
| 8904 | CPNE1   | 131034 | CPNE4      | L |
| 8905 | AP1S2   | 8906   | AP1G2      | L |
| 8905 | AP1S2   | 23163  | GGA3       | L |
| 8906 | AP1G2   | 9135   | RABEP1     | L |
| 8906 | AP1G2   | 11276  | AP1GBP1    | L |
| 8906 | AP1G2   | 54464  | XRN1       | L |
| 8906 | AP1G2   | 54812  | AFTIPHILIN | L |
| 8907 | AP1M1   | 9513   | FXR2       | R |
| 8907 | AP1M1   | 10053  | AP1M2      | L |
| 8907 | AP1M1   | 10618  | TGOLN2     | L |
| 8907 | AP1M1   | 10900  | RPIP8      | R |
| 8907 | AP1M1   | 23641  | LDOC1      | R |
| 8907 | AP1M1   | 30846  | EHD2       | L |

|      |           |        |               |   |
|------|-----------|--------|---------------|---|
| 8907 | AP1M1     | 63971  | KIF13A        | L |
| 8907 | AP1M1     | 92610  | TIFA          | R |
| 8907 | AP1M1     | 127557 | ZBTB8         | R |
| 8910 | SGCE      | 10425  | ARIH2         | S |
| 8915 | BCL10     | 10892  | MALT1         | L |
| 8915 | BCL10     | 29775  | CARD10        | L |
| 8915 | BCL10     | 58484  | CARD12        | L |
| 8915 | BCL10     | 64170  | CARD9         | L |
| 8915 | BCL10     | 79092  | CARD14        | L |
| 8915 | BCL10     | 84270  | C9orf89       | L |
| 8915 | BCL10     | 84433  | CARD11        | L |
| 8924 | HERC2     | 26994  | RNF11         | L |
| 8925 | HERC1     | 26994  | RNF11         | L |
| 8927 | BSN       | 26059  | CAST1         | L |
| 8928 | FOXH1     | 10589  | DRAP1         | L |
| 8932 | MBD2      | 11321  | XAB1          | L |
| 8932 | MBD2      | 25988  | MIZF          | L |
| 8932 | MBD2      | 54815  | GATAD2A       | L |
| 8934 | RAB7L1    | 51690  | LSM7          | L |
| 8935 | SCAP2     | 84106  | PRAM1         | L |
| 8936 | WASF1     | 9051   | PSTPIP1       | L |
| 8936 | WASF1     | 10152  | ABI2          | L |
| 8936 | WASF1     | 23268  | DNMBP         | L |
| 8940 | TOP3B     | 9400   | RECQL5        | L |
| 8940 | TOP3B     | 10516  | FBLN5         | L |
| 8940 | TOP3B     | 26511  | CHIC2         | R |
| 8940 | TOP3B     | 79797  | ZNF408        | L |
| 8940 | TOP3B     | 83755  | KRTAP4-12     | R |
| 8940 | TOP3B     | 161882 | ZFPM1         | L |
| 8945 | BTRC      | 9787   | DLG7          | L |
| 8945 | BTRC      | 23291  | FBXW11        | L |
| 8945 | BTRC      | 29978  | UBQLN2        | L |
| 8945 | BTRC      | 51684  | SUFU          | L |
| 8945 | BTRC      | 114088 | TRIM9         | R |
| 8975 | USP13     | 51168  | MYO15A        | S |
| 8975 | USP13     | 54874  | FNBP1L        | S |
| 8975 | USP13     | 55052  | MRPL20        | S |
| 8975 | USP13     | 65991  | FUNDC2        | S |
| 8975 | USP13     | 84675  | TRIM55        | L |
| 8975 | USP13     | 84676  | TRIM63        | L |
| 8976 | WASL      | 23268  | DNMBP         | L |
| 8976 | WASL      | 23433  | RHOQ          | L |
| 8976 | WASL      | 29763  | PACSIN3       | L |
| 8976 | WASL      | 29993  | PACSIN1       | L |
| 8976 | WASL      | 54874  | FNBP1L        | L |
| 8976 | WASL      | 55660  | FNBP3         | L |
| 8985 | PLOD3     | 10919  | EHMT2         | R |
| 8985 | PLOD3     | 11007  | DIPA          | R |
| 8985 | PLOD3     | 84528  | PEPP-2        | R |
| 8985 | PLOD3     | 151871 | DPPA2         | R |
| 8985 | PLOD3     | 285596 | NY-REN-7      | R |
| 8987 | GENX-3414 | 55729  | ATF7IP        | L |
| 8988 | HSPB3     | 9094   | UNC119        | S |
| 8988 | HSPB3     | 9869   | SETDB1        | S |
| 8988 | HSPB3     | 10268  | RAMP3         | S |
| 8988 | HSPB3     | 23140  | ZZEF1         | S |
| 8988 | HSPB3     | 26012  | NELF          | S |
| 8988 | HSPB3     | 26071  | DKFZP564B147  | S |
| 8988 | HSPB3     | 51003  | MED31         | S |
| 8988 | HSPB3     | 55791  | C1orf103      | S |
| 8988 | HSPB3     | 56944  | OLFML3        | S |
| 8988 | HSPB3     | 64978  | MRPL38        | S |
| 8988 | HSPB3     | 84060  | DKFZP564O0523 | S |
| 8988 | HSPB3     | 112950 | MED8          | S |
| 8991 | SELENBP1  | 9319   | TRIP13        | R |
| 8991 | SELENBP1  | 26073  | POLDIP2       | S |
| 8991 | SELENBP1  | 51003  | MED31         | S |

|      |          |        |           |   |
|------|----------|--------|-----------|---|
| 8991 | SELENBP1 | 55791  | C1orf103  | S |
| 8994 | LIMD1    | 10114  | HIPK3     | L |
| 8996 | NOL3     | 29844  | TFPT      | L |
| 8996 | NOL3     | 55224  | ETNK2     | R |
| 8996 | NOL3     | 60491  | NIF3L1    | R |
| 8996 | NOL3     | 140885 | PTPNS1    | R |
| 9001 | HAP1     | 9146   | HGS       | L |
| 9001 | HAP1     | 9551   | ATP5J2    | S |
| 9001 | HAP1     | 9804   | TOMM20    | S |
| 9001 | HAP1     | 10081  | PDCD7     | S |
| 9001 | HAP1     | 10440  | TIMM17A   | S |
| 9001 | HAP1     | 11079  | RER1      | S |
| 9001 | HAP1     | 23557  | SNAPAP    | S |
| 9001 | HAP1     | 25934  | NIPSNAP3A | S |
| 9001 | HAP1     | 29070  | HSPC065   | S |
| 9001 | HAP1     | 29997  | GLTSCR2   | S |
| 9001 | HAP1     | 51058  | ZNF691    | S |
| 9001 | HAP1     | 54555  | DDX49     | S |
| 9001 | HAP1     | 55755  | CDK5RAP2  | S |
| 9001 | HAP1     | 57050  | SAS10     | S |
| 9001 | HAP1     | 57332  | CBX8      | S |
| 9001 | HAP1     | 64965  | MRPS9     | S |
| 9001 | HAP1     | 65265  | C8orf33   | S |
| 9001 | HAP1     | 65990  | C16orf24  | S |
| 9001 | HAP1     | 79101  | MGC5306   | S |
| 9001 | HAP1     | 79768  | C15orf29  | S |
| 9001 | HAP1     | 266812 | NAP1L5    | S |
| 9013 | TAF1C    | 9014   | TAF1B     | L |
| 9013 | TAF1C    | 9015   | TAF1A     | L |
| 9014 | TAF1B    | 9015   | TAF1A     | L |
| 9019 | MPZL1    | 54512  | EXOSC4    | L |
| 9025 | RNF8     | 10477  | UBE2E3    | L |
| 9025 | RNF8     | 11007  | DIPA      | R |
| 9025 | RNF8     | 23404  | EXOSC2    | L |
| 9025 | RNF8     | 80817  | KIAA1712  | R |
| 9031 | BAZ1B    | 10036  | CHAF1A    | L |
| 9040 | UBE2M    | 131034 | CPNE4     | L |
| 9040 | UBE2M    | 221184 | CPNE2     | L |
| 9045 | RPL14    | 22822  | PHLDA1    | L |
| 9046 | DOK2     | 26128  | KIAA1279  | R |
| 9051 | PSTPIP1  | 10163  | WASF2     | L |
| 9051 | PSTPIP1  | 26469  | PTPN18    | L |
| 9053 | MAP7     | 59341  | TRPV4     | L |
| 9055 | PRC1     | 11007  | DIPA      | R |
| 9055 | PRC1     | 54474  | KRT20     | R |
| 9055 | PRC1     | 83878  | USHBP1    | R |
| 9061 | PAPSS1   | 9094   | UNC119    | S |
| 9061 | PAPSS1   | 84988  | PPP1R16A  | S |
| 9063 | PIAS2    | 9569   | GTF2IRD1  | L |
| 9063 | PIAS2    | 11315  | PARK7     | L |
| 9063 | PIAS2    | 79753  | SNIP1     | L |
| 9063 | PIAS2    | 89797  | NAV2      | R |
| 9069 | CLDN12   | 29888  | STRN4     | S |
| 9070 | ASH2L    | 9094   | UNC119    | S |
| 9070 | ASH2L    | 84661  | LOC84661  | R |
| 9075 | CLDN2    | 83755  | KRTAP4-12 | R |
| 9076 | CLDN1    | 9414   | TJP2      | L |
| 9076 | CLDN1    | 10207  | INADL     | L |
| 9076 | CLDN1    | 23476  | BRD4      | S |
| 9083 | BPY2     | 55201  | BPY2IP1   | L |
| 9088 | PKMYT1   | 55240  | STEAP3    | L |
| 9093 | DNAJA3   | 9278   | ZNF297    | R |
| 9093 | DNAJA3   | 80196  | RNF34     | L |
| 9093 | DNAJA3   | 348487 | C1orf117  | R |
| 9094 | UNC119   | 9540   | TP53I3    | S |
| 9094 | UNC119   | 10063  | COX17     | S |
| 9094 | UNC119   | 10200  | MPHOSPH6  | S |

|      |         |        |           |   |
|------|---------|--------|-----------|---|
| 9094 | UNC119  | 10571  | SMA3      | S |
| 9094 | UNC119  | 11068  | CYB561D2  | S |
| 9094 | UNC119  | 19241  | (null)    | S |
| 9094 | UNC119  | 22902  | RIPX      | S |
| 9094 | UNC119  | 22929  | SEPHS1    | S |
| 9094 | UNC119  | 23028  | AOF2      | S |
| 9094 | UNC119  | 51631  | LUC7L2    | S |
| 9094 | UNC119  | 54622  | ARFRP2    | S |
| 9094 | UNC119  | 54810  | GIPC2     | S |
| 9094 | UNC119  | 55274  | PHF10     | S |
| 9094 | UNC119  | 55299  | BXDC2     | S |
| 9094 | UNC119  | 55643  | BTBD2     | S |
| 9094 | UNC119  | 55734  | ZFP64     | S |
| 9094 | UNC119  | 56144  | PCDHA4    | S |
| 9094 | UNC119  | 56893  | UBQLN4    | S |
| 9094 | UNC119  | 57332  | CBX8      | S |
| 9094 | UNC119  | 63943  | FKBPL     | S |
| 9094 | UNC119  | 79719  | FLJ11506  | S |
| 9094 | UNC119  | 80228  | C7orf19   | S |
| 9094 | UNC119  | 81890  | QTRT1     | S |
| 9094 | UNC119  | 170961 | ANKRD24   | S |
| 9094 | UNC119  | 404550 | MGC17624  | R |
| 9099 | USP2    | 11007  | DIPA      | R |
| 9099 | USP2    | 29911  | HOOK2     | R |
| 9099 | USP2    | 57596  | KIAA1446  | R |
| 9099 | USP2    | 79656  | C1orf165  | R |
| 9100 | USP10   | 10146  | G3BP      | L |
| 9101 | USP8    | 10049  | DNAJB6    | L |
| 9101 | USP8    | 10254  | STAM2     | L |
| 9110 | MTMR4   | 10114  | HIPK3     | L |
| 9111 | NMI     | 9146   | HGS       | R |
| 9111 | NMI     | 10302  | SNAPC5    | R |
| 9111 | NMI     | 11117  | EMILIN1   | R |
| 9111 | NMI     | 11147  | HHLA3     | R |
| 9111 | NMI     | 25804  | LSM4      | L |
| 9111 | NMI     | 55707  | NECAP2    | R |
| 9111 | NMI     | 374659 | HDDC3     | R |
| 9112 | MTA1    | 51497  | TH1L      | S |
| 9124 | PDLIM1  | 9489   | PGS1      | S |
| 9124 | PDLIM1  | 55750  | MULK      | S |
| 9124 | PDLIM1  | 140901 | STK35     | L |
| 9126 | CSPG6   | 22920  | KIFAP3    | L |
| 9126 | CSPG6   | 27127  | SMC1L2    | L |
| 9128 | PRPF4   | 9551   | ATP5J2    | S |
| 9128 | PRPF4   | 10465  | PPIH      | L |
| 9129 | PRPF3   | 9733   | SART3     | L |
| 9129 | PRPF3   | 11007  | DIPA      | R |
| 9129 | PRPF3   | 84661  | LOC84661  | R |
| 9129 | PRPF3   | 84705  | GTPBP3    | R |
| 9131 | PDCD8   | 9869   | SETDB1    | S |
| 9131 | PDCD8   | 23286  | KIBRA     | S |
| 9131 | PDCD8   | 84273  | C4orf14   | S |
| 9134 | CCNE2   | 23595  | ORC3L     | L |
| 9135 | RABEP1  | 23062  | GGA2      | L |
| 9135 | RABEP1  | 23163  | GGA3      | L |
| 9135 | RABEP1  | 27342  | RABGEF1   | L |
| 9135 | RABEP1  | 30811  | HUNK      | L |
| 9135 | RABEP1  | 83452  | RAB33B    | L |
| 9138 | ARHGEF1 | 10672  | GNA13     | L |
| 9139 | CBFA2T2 | 9611   | NCOR1     | L |
| 9139 | CBFA2T2 | 9612   | NCOR2     | L |
| 9139 | CBFA2T2 | 25942  | SIN3A     | L |
| 9139 | CBFA2T2 | 55093  | C8orf32   | R |
| 9140 | ATG12   | 83755  | KRTAP4-12 | R |
| 9141 | PDCD5   | 10524  | HTATIP    | S |
| 9141 | PDCD5   | 10813  | UTP14A    | S |
| 9141 | PDCD5   | 55791  | C1orf103  | S |

|      |          |        |              |   |
|------|----------|--------|--------------|---|
| 9141 | PDCD5    | 57562  | KIAA1377     | S |
| 9146 | HGS      | 9443   | CRSP9        | R |
| 9146 | HGS      | 9802   | DAZAP2       | R |
| 9146 | HGS      | 10254  | STAM2        | R |
| 9146 | HGS      | 10919  | EHMT2        | R |
| 9146 | HGS      | 23265  | EXOC7        | R |
| 9146 | HGS      | 23641  | LDOC1        | R |
| 9146 | HGS      | 29979  | UBQLN1       | R |
| 9146 | HGS      | 57409  | AD023        | R |
| 9146 | HGS      | 57596  | KIAA1446     | R |
| 9146 | HGS      | 80125  | FLJ32855     | R |
| 9146 | HGS      | 80318  | GKAP1        | R |
| 9146 | HGS      | 83878  | USHBP1       | R |
| 9146 | HGS      | 149371 | EXOC8        | R |
| 9146 | HGS      | 541468 | C1orf190     | R |
| 9149 | DYRK1B   | 10048  | RANBP9       | L |
| 9149 | DYRK1B   | 10238  | WDR68        | L |
| 9158 | FIBP     | 9982   | FGFBP1       | L |
| 9158 | FIBP     | 140545 | RNF32        | S |
| 9169 | SFRS2IP  | 11338  | U2AF2        | L |
| 9173 | IL1RL1   | 11018  | TMED1        | L |
| 9175 | MAP3K13  | 9479   | MAPK8IP1     | L |
| 9175 | MAP3K13  | 10935  | PRDX3        | L |
| 9183 | ZW10     | 9735   | KNTC1        | L |
| 9184 | BUB3     | 10038  | PARP2        | L |
| 9185 | REPS2    | 50807  | DDEF1        | L |
| 9189 | ZBED1    | 10174  | SORBS3       | R |
| 9189 | ZBED1    | 10597  | SEDLP        | R |
| 9189 | ZBED1    | 11321  | XAB1         | R |
| 9189 | ZBED1    | 25876  | C20orf28     | R |
| 9189 | ZBED1    | 26086  | GPSM1        | R |
| 9189 | ZBED1    | 51388  | CGI-37       | R |
| 9189 | ZBED1    | 60491  | NIF3L1       | R |
| 9189 | ZBED1    | 79873  | NUDT18       | R |
| 9191 | DEDD     | 162989 | DEDD2        | L |
| 9205 | ZMYM5    | 79753  | SNIP1        | L |
| 9212 | AURKB    | 10607  | TBL3         | S |
| 9212 | AURKB    | 29127  | RACGAP1      | L |
| 9212 | AURKB    | 55139  | FLJ10415     | S |
| 9218 | VAPA     | 150094 | SNF1LK       | L |
| 9219 | MTA2     | 23013  | SPEN         | L |
| 9221 | NOLC1    | 25885  | POLR1A       | L |
| 9223 | MAG1     | 9311   | ACCN3        | L |
| 9223 | MAG1     | 10276  | NET1         | L |
| 9229 | DLGAP1   | 22941  | SHANK2       | L |
| 9229 | DLGAP1   | 140735 | Dic2         | L |
| 9230 | RAB11B   | 10133  | OPTN         | L |
| 9230 | RAB11B   | 22841  | RAB11FIP2    | L |
| 9231 | DLG5     | 10174  | SORBS3       | L |
| 9231 | DLG5     | 84280  | BTBD10       | S |
| 9240 | PNMA1    | 79165  | LENG1        | S |
| 9240 | PNMA1    | 84968  | PNMA6A       | S |
| 9244 | CRLF1    | 23529  | CLCF1        | L |
| 9246 | UBE2L6   | 9810   | RNF40        | L |
| 9246 | UBE2L6   | 25820  | ARIH1        | L |
| 9246 | UBE2L6   | 25897  | RNF19        | L |
| 9260 | PDLIM7   | 9491   | PSMF1        | R |
| 9260 | PDLIM7   | 11060  | WWP2         | R |
| 9260 | PDLIM7   | 25865  | PRKD2        | L |
| 9260 | PDLIM7   | 57144  | PAK7         | R |
| 9260 | PDLIM7   | 79025  | MGC5356      | R |
| 9260 | PDLIM7   | 84080  | C16orf48     | R |
| 9260 | PDLIM7   | 91056  | DKFZp761E198 | R |
| 9260 | PDLIM7   | 164127 | C1orf65      | R |
| 9261 | MAPKAPK2 | 10092  | ARPC5        | L |
| 9261 | MAPKAPK2 | 10949  | HNRPA0       | L |
| 9262 | STK17B   | 11261  | CHP          | L |

|      |          |        |          |    |
|------|----------|--------|----------|----|
| 9265 | PSCD3    | 10256  | CNKSR1   | R  |
| 9265 | PSCD3    | 57658  | CALCOCO1 | R  |
| 9266 | PSCD2    | 90060  | JM11     | R  |
| 9267 | PSCD1    | 9595   | PSCDBP   | L  |
| 9267 | PSCD1    | 10139  | ARFRP1   | L  |
| 9278 | ZNF297   | 56893  | UBQLN4   | S  |
| 9294 | EDG5     | 10672  | GNA13    | L  |
| 9295 | SFRS11   | 11338  | U2AF2    | L  |
| 9296 | ATP6V1F  | 57562  | KIAA1377 | S  |
| 9311 | ACCN3    | 10207  | INADL    | L  |
| 9311 | ACCN3    | 57120  | GOPC     | L  |
| 9311 | ACCN3    | 64130  | LIN7B    | L  |
| 9315 | C5orf13  | 84966  | IGSF21   | S  |
| 9318 | COPS2    | 60491  | NIF3L1   | L  |
| 9319 | TRIP13   | 9587   | MAD2L1BP | RS |
| 9319 | TRIP13   | 9721   | KIAA0514 | R  |
| 9319 | TRIP13   | 10802  | SEC24A   | R  |
| 9319 | TRIP13   | 11030  | RBPMS    | R  |
| 9319 | TRIP13   | 23564  | DDAH2    | R  |
| 9319 | TRIP13   | 23583  | SMUG1    | R  |
| 9319 | TRIP13   | 26086  | GPSM1    | R  |
| 9319 | TRIP13   | 28970  | PTD012   | R  |
| 9319 | TRIP13   | 51316  | PLAC8    | R  |
| 9319 | TRIP13   | 51700  | CYB5R2   | R  |
| 9319 | TRIP13   | 54973  | CPSF3L   | R  |
| 9319 | TRIP13   | 55093  | C8orf32  | R  |
| 9319 | TRIP13   | 57048  | PLSCR3   | R  |
| 9319 | TRIP13   | 57088  | PLSCR4   | R  |
| 9319 | TRIP13   | 57559  | AMSH-LP  | R  |
| 9319 | TRIP13   | 57707  | KIAA1609 | R  |
| 9319 | TRIP13   | 57715  | SEMA4G   | R  |
| 9319 | TRIP13   | 60491  | NIF3L1   | R  |
| 9319 | TRIP13   | 64081  | MAWBP    | R  |
| 9319 | TRIP13   | 79027  | ZNF655   | R  |
| 9319 | TRIP13   | 79092  | CARD14   | R  |
| 9319 | TRIP13   | 79754  | ASB13    | R  |
| 9319 | TRIP13   | 81932  | HDHD3    | R  |
| 9319 | TRIP13   | 83897  | KRTAP3-2 | R  |
| 9319 | TRIP13   | 84171  | LOXL4    | R  |
| 9319 | TRIP13   | 84708  | LNX      | R  |
| 9319 | TRIP13   | 113878 | DTX2     | R  |
| 9319 | TRIP13   | 115761 | ARL11    | R  |
| 9319 | TRIP13   | 132158 | GLYCTK   | R  |
| 9319 | TRIP13   | 200523 | FLJ25369 | R  |
| 9320 | TRIP12   | 55729  | ATF7IP   | L  |
| 9322 | TRIP10   | 10142  | AKAP9    | L  |
| 9322 | TRIP10   | 23433  | RHOQ     | L  |
| 9322 | TRIP10   | 51729  | WBP11    | R  |
| 9325 | TRIP4    | 10973  | ASCC3    | L  |
| 9337 | CNOT8    | 10766  | TOB2     | L  |
| 9337 | CNOT8    | 10950  | BTG3     | L  |
| 9337 | CNOT8    | 23019  | CNOT1    | L  |
| 9341 | VAMP3    | 10134  | BCAP31   | L  |
| 9342 | SNAP29   | 541468 | C1orf190 | R  |
| 9343 | EFTUD2   | 10094  | ARPC3    | S  |
| 9343 | EFTUD2   | 10594  | PRPF8    | L  |
| 9343 | EFTUD2   | 24148  | C20orf14 | L  |
| 9343 | EFTUD2   | 51280  | GOLPH2   | S  |
| 9349 | RPL23    | 56647  | BCCIP    | R  |
| 9351 | SLC9A3R2 | 23678  | SGK3     | L  |
| 9351 | SLC9A3R2 | 25937  | WWTR1    | L  |
| 9355 | LHX2     | 10370  | CITED2   | L  |
| 9355 | LHX2     | 51132  | RNF12    | L  |
| 9356 | SLC22A6  | 10513  | APPBP2   | R  |
| 9362 | CPNE6    | 26289  | AK5      | S  |
| 9363 | RAB33A   | 10313  | RTN3     | R  |
| 9363 | RAB33A   | 10567  | RABAC1   | R  |



|      |          |        |           |    |
|------|----------|--------|-----------|----|
| 9363 | RAB33A   | 57142  | RTN4      | R  |
| 9367 | RAB9A    | 9375   | TM9SF2    | L  |
| 9367 | RAB9A    | 10226  | M6PRBP1   | L  |
| 9367 | RAB9A    | 10244  | RABEPK    | L  |
| 9368 | SLC9A3R1 | 9498   | SLC4A8    | L  |
| 9368 | SLC9A3R1 | 10413  | YAP1      | L  |
| 9368 | SLC9A3R1 | 11216  | AKAP10    | L  |
| 9368 | SLC9A3R1 | 23236  | PLCB1     | L  |
| 9368 | SLC9A3R1 | 55824  | PAG1      | L  |
| 9370 | ADIPOQ   | 79602  | ADIPOR2   | L  |
| 9371 | KIF3B    | 22920  | KIFAP3    | L  |
| 9372 | ZFYVE9   | 9631   | NUP155    | L  |
| 9372 | ZFYVE9   | 9802   | DAZAP2    | L  |
| 9372 | ZFYVE9   | 23111  | SPG20     | L  |
| 9372 | ZFYVE9   | 23141  | KIAA0692  | L  |
| 9372 | ZFYVE9   | 23613  | PRKCBP1   | L  |
| 9372 | ZFYVE9   | 25870  | SUMF2     | L  |
| 9372 | ZFYVE9   | 26994  | RNF11     | L  |
| 9372 | ZFYVE9   | 55603  | FAM46A    | L  |
| 9372 | ZFYVE9   | 55681  | SCYL2     | L  |
| 9372 | ZFYVE9   | 55914  | ERBB2IP   | L  |
| 9372 | ZFYVE9   | 79987  | SVEP1     | L  |
| 9372 | ZFYVE9   | 84181  | CHD6      | L  |
| 9372 | ZFYVE9   | 89941  | RHOT2     | L  |
| 9372 | ZFYVE9   | 91544  | UBXD5     | L  |
| 9373 | PLAA     | 10013  | HDAC6     | L  |
| 9377 | COX5A    | 10980  | COPS6     | S  |
| 9378 | NRXN1    | 26037  | SIPA1L1   | L  |
| 9379 | NRXN2    | 57062  | DDX24     | S  |
| 9380 | GRHPR    | 27257  | LSM1      | L  |
| 9382 | COG1     | 25839  | COG4      | L  |
| 9382 | COG1     | 83548  | COG3      | L  |
| 9388 | LIPG     | 56915  | EXOSC5    | L  |
| 9391 | WDR39    | 51280  | GOLPH2    | S  |
| 9391 | WDR39    | 51647  | FAM96B    | R  |
| 9391 | WDR39    | 84191  | FAM96A    | R  |
| 9391 | WDR39    | 221016 | CCDC7     | R  |
| 9398 | IGSF2    | 22827  | SIAHBP1   | S  |
| 9400 | RECQL5   | 9479   | MAPK8IP1  | S  |
| 9400 | RECQL5   | 9788   | MTSS1     | S  |
| 9400 | RECQL5   | 10617  | STAMPB    | S  |
| 9400 | RECQL5   | 11325  | DDX42     | S  |
| 9400 | RECQL5   | 23421  | ITGB3BP   | S  |
| 9400 | RECQL5   | 221442 | LOC221442 | S  |
| 9401 | RECQL4   | 11098  | PRSS23    | S  |
| 9402 | GRAP2    | 9846   | GAB2      | L  |
| 9402 | GRAP2    | 10399  | GNB2L1    | L  |
| 9402 | GRAP2    | 10617  | STAMPB    | RL |
| 9402 | GRAP2    | 10657  | KHDRBS1   | L  |
| 9402 | GRAP2    | 11030  | RPBMS     | R  |
| 9402 | GRAP2    | 11184  | MAP4K1    | L  |
| 9402 | GRAP2    | 23582  | CCNDBP1   | L  |
| 9402 | GRAP2    | 27040  | LAT       | L  |
| 9402 | GRAP2    | 51043  | ZBTB7B    | R  |
| 9402 | GRAP2    | 79656  | C1orf165  | R  |
| 9402 | GRAP2    | 83755  | KRTAP4-12 | R  |
| 9402 | GRAP2    | 139716 | GAB3      | L  |
| 9404 | LPXN     | 9883   | POM121    | R  |
| 9404 | LPXN     | 51317  | PHF21A    | R  |
| 9404 | LPXN     | 55272  | IMP3      | R  |
| 9404 | LPXN     | 79088  | ZNF426    | R  |
| 9410 | WDR57    | 10594  | PRPF8     | L  |
| 9410 | WDR57    | 24148  | C20orf14  | L  |
| 9413 | C9orf61  | 9531   | BAG3      | R  |
| 9414 | TJP2     | 30011  | SH3KBP1   | L  |
| 9414 | TJP2     | 57530  | CGN       | L  |
| 9421 | HAND1    | 9464   | HAND2     | L  |

|      |          |        |               |   |
|------|----------|--------|---------------|---|
| 9439 | CRSP3    | 9969   | THRAP1        | L |
| 9439 | CRSP3    | 23038  | WDTA1         | L |
| 9439 | CRSP3    | 23054  | NCOA6         | L |
| 9439 | CRSP3    | 23369  | PUM2          | L |
| 9446 | GSTO1    | 9869   | SETDB1        | S |
| 9446 | GSTO1    | 10524  | HTATIP        | S |
| 9446 | GSTO1    | 57562  | KIAA1377      | S |
| 9446 | GSTO1    | 84060  | DKFZP564O0523 | S |
| 9454 | HOMER3   | 9456   | HOMER1        | L |
| 9454 | HOMER3   | 23045  | KIAA0826      | R |
| 9454 | HOMER3   | 140735 | Dlc2          | R |
| 9455 | HOMER2   | 116986 | CENTG1        | L |
| 9456 | HOMER1   | 23673  | STX12         | L |
| 9456 | HOMER1   | 50944  | SHANK1        | L |
| 9456 | HOMER1   | 51225  | ABI3          | R |
| 9456 | HOMER1   | 79098  | C1orf116      | R |
| 9456 | HOMER1   | 116986 | CENTG1        | L |
| 9457 | FHL5     | 10126  | DNAL4         | R |
| 9457 | FHL5     | 57576  | KIF17         | L |
| 9459 | ARHGEF6  | 28964  | GIT1          | L |
| 9464 | HAND2    | 10987  | COPS5         | L |
| 9470 | EIF4E2   | 25820  | ARIH1         | L |
| 9470 | EIF4E2   | 54474  | KRT20         | R |
| 9470 | EIF4E2   | 56478  | EIF4ENIF1     | R |
| 9470 | EIF4E2   | 83755  | KRTAP4-12     | R |
| 9479 | MAPK8IP1 | 80824  | DUSP16        | L |
| 9482 | STX8     | 10488  | CREB3         | R |
| 9482 | STX8     | 10490  | VTI1B         | R |
| 9482 | STX8     | 29062  | HSPC049       | S |
| 9489 | PGS1     | 11337  | GABARAP       | S |
| 9491 | PSMF1    | 10656  | KHDRBS3       | R |
| 9491 | PSMF1    | 11007  | DIPA          | R |
| 9491 | PSMF1    | 11051  | NUDT21        | R |
| 9491 | PSMF1    | 27316  | RBMX          | R |
| 9491 | PSMF1    | 29911  | HOOK2         | R |
| 9491 | PSMF1    | 55658  | RNF126        | R |
| 9491 | PSMF1    | 84528  | PEPP-2        | R |
| 9491 | PSMF1    | 125170 | SMCR7         | R |
| 9491 | PSMF1    | 222389 | C10orf30      | R |
| 9493 | KIF23    | 29127  | RACGAP1       | L |
| 9496 | TBX4     | 55603  | FAM46A        | L |
| 9500 | MAGED1   | 9867   | PJA2          | L |
| 9500 | MAGED1   | 22142  | (null)        | S |
| 9500 | MAGED1   | 51547  | SIRT7         | S |
| 9500 | MAGED1   | 51660  | BRP44L        | S |
| 9500 | MAGED1   | 64219  | PJA1          | L |
| 9500 | MAGED1   | 64582  | GPR135        | S |
| 9501 | RPH3AL   | 9545   | RAB3D         | L |
| 9501 | RPH3AL   | 9699   | RIMS2         | L |
| 9501 | RPH3AL   | 10497  | UNC13B        | L |
| 9502 | XAGE2    | 10919  | EHMT2         | R |
| 9512 | PMPCB    | 23203  | PMPCA         | L |
| 9513 | FXR2     | 10197  | PSME3         | R |
| 9513 | FXR2     | 10241  | NDP52         | R |
| 9513 | FXR2     | 10313  | RTN3          | R |
| 9513 | FXR2     | 10445  | MCRS1         | R |
| 9513 | FXR2     | 10534  | SSSCA1        | R |
| 9513 | FXR2     | 10567  | RABAC1        | R |
| 9513 | FXR2     | 10606  | PAICS         | R |
| 9513 | FXR2     | 11007  | DIPA          | R |
| 9513 | FXR2     | 11030  | RBPMS         | R |
| 9513 | FXR2     | 22934  | RPIA          | R |
| 9513 | FXR2     | 22978  | NT5C2         | R |
| 9513 | FXR2     | 23204  | ARL6IP        | R |
| 9513 | FXR2     | 23641  | LDOC1         | R |
| 9513 | FXR2     | 23650  | TRIM29        | R |
| 9513 | FXR2     | 26036  | ZNF451        | R |

|      |          |        |           |   |
|------|----------|--------|-----------|---|
| 9513 | FXR2     | 26999  | CYFIP2    | L |
| 9513 | FXR2     | 27316  | RBMX      | R |
| 9513 | FXR2     | 51421  | AMOTL2    | R |
| 9513 | FXR2     | 51451  | LCMT1     | R |
| 9513 | FXR2     | 51562  | MBIP      | R |
| 9513 | FXR2     | 54474  | KRT20     | R |
| 9513 | FXR2     | 54550  | EFCBP2    | R |
| 9513 | FXR2     | 55145  | THAP1     | R |
| 9513 | FXR2     | 56243  | KIAA1217  | R |
| 9513 | FXR2     | 57142  | RTN4      | R |
| 9513 | FXR2     | 64769  | C1orf149  | R |
| 9513 | FXR2     | 79036  | MGC2749   | R |
| 9513 | FXR2     | 80125  | FLJ32855  | R |
| 9513 | FXR2     | 80318  | GKAP1     | R |
| 9513 | FXR2     | 81628  | TSC22D4   | R |
| 9513 | FXR2     | 127557 | ZBTB8     | R |
| 9513 | FXR2     | 138046 | LOC138046 | R |
| 9513 | FXR2     | 151871 | DPPA2     | R |
| 9513 | FXR2     | 283518 | KCNRG     | R |
| 9513 | FXR2     | 386618 | KCTD4     | R |
| 9513 | FXR2     | 414157 | C10orf62  | R |
| 9516 | LITAF    | 55698  | FLJ10324  | S |
| 9517 | SPTLC2   | 10558  | SPTLC1    | L |
| 9519 | TBPL1    | 10226  | M6PRBP1   | S |
| 9519 | TBPL1    | 11021  | RAB35     | S |
| 9519 | TBPL1    | 51135  | IRAK4     | S |
| 9519 | TBPL1    | 54978  | C2orf18   | S |
| 9519 | TBPL1    | 55037  | FLJ20758  | S |
| 9519 | TBPL1    | 55324  | ABCF3     | S |
| 9522 | SCAMP1   | 10066  | SCAMP2    | L |
| 9522 | SCAMP1   | 11276  | AP1GBP1   | L |
| 9531 | BAG3     | 9802   | DAZAP2    | R |
| 9531 | BAG3     | 26353  | HSPB8     | R |
| 9533 | POLR1C   | 51082  | POLR1D    | R |
| 9540 | TP53I3   | 65991  | FUNDC2    | S |
| 9540 | TP53I3   | 197131 | UBR1      | S |
| 9541 | CIR      | 9612   | NCOR2     | L |
| 9541 | CIR      | 22938  | SNW1      | L |
| 9545 | RAB3D    | 9699   | RIMS2     | L |
| 9545 | RAB3D    | 117177 | RAB3IP    | L |
| 9551 | ATP5J2   | 23028  | AOF2      | S |
| 9551 | ATP5J2   | 55207  | ARL10C    | S |
| 9551 | ATP5J2   | 78987  | CRELD1    | S |
| 9551 | ATP5J2   | 339230 | MGC16597  | S |
| 9564 | BCAR1    | 10045  | SH2D3A    | L |
| 9564 | BCAR1    | 10278  | EFS       | S |
| 9564 | BCAR1    | 22142  | (null)    | S |
| 9564 | BCAR1    | 23607  | CD2AP     | L |
| 9564 | BCAR1    | 23645  | PPP1R15A  | S |
| 9564 | BCAR1    | 53826  | FXD6      | S |
| 9564 | BCAR1    | 55823  | VPS11     | S |
| 9564 | BCAR1    | 80725  | SNIP      | L |
| 9568 | GPR51    | 22809  | ATF5      | L |
| 9569 | GTF2IRD1 | 54512  | EXOSC4    | L |
| 9572 | NR1D1    | 9611   | NCOR1     | L |
| 9577 | BRE      | 29086  | HSPC142   | R |
| 9584 | RNPC2    | 23054  | NCOA6     | L |
| 9586 | CREB5    | 10488  | CREB3     | L |
| 9586 | CREB5    | 10538  | BATF      | L |
| 9586 | CREB5    | 11016  | ATF7      | L |
| 9586 | CREB5    | 55509  | SNFT      | L |
| 9586 | CREB5    | 58487  | ZF        | L |
| 9586 | CREB5    | 60468  | BACH2     | L |
| 9587 | MAD2L1BP | 9869   | SETDB1    | S |
| 9587 | MAD2L1BP | 10524  | HTATIP    | S |
| 9587 | MAD2L1BP | 55791  | C1orf103  | S |
| 9587 | MAD2L1BP | 57562  | KIAA1377  | S |

|      |          |        |           |   |
|------|----------|--------|-----------|---|
| 9587 | MAD2L1BP | 84966  | IGSF21    | S |
| 9604 | RNF14    | 55603  | FAM46A    | L |
| 9610 | RIN1     | 22800  | RRAS2     | L |
| 9611 | NCOR1    | 9734   | HDAC9     | L |
| 9611 | NCOR1    | 9759   | HDAC4     | L |
| 9611 | NCOR1    | 9975   | NR1D2     | L |
| 9611 | NCOR1    | 10009  | ZBTB33    | L |
| 9611 | NCOR1    | 10014  | HDAC5     | L |
| 9611 | NCOR1    | 10771  | ZMYND11   | L |
| 9611 | NCOR1    | 23013  | SPEN      | L |
| 9611 | NCOR1    | 23411  | SIRT1     | L |
| 9611 | NCOR1    | 23493  | HEY2      | L |
| 9611 | NCOR1    | 25942  | SIN3A     | L |
| 9612 | NCOR2    | 9759   | HDAC4     | L |
| 9612 | NCOR2    | 10014  | HDAC5     | L |
| 9612 | NCOR2    | 22938  | SNW1      | L |
| 9612 | NCOR2    | 23013  | SPEN      | L |
| 9612 | NCOR2    | 23411  | SIRT1     | L |
| 9612 | NCOR2    | 51564  | HDAC7A    | L |
| 9612 | NCOR2    | 83933  | HDAC10    | L |
| 9616 | RNF7     | 81618  | ITM2C     | R |
| 9618 | TRAF4    | 10295  | BCKDK     | L |
| 9618 | TRAF4    | 11138  | TBC1D8    | L |
| 9618 | TRAF4    | 27036  | SIGLEC7   | L |
| 9618 | TRAF4    | 54535  | CCHCR1    | L |
| 9618 | TRAF4    | 57473  | GM632     | L |
| 9618 | TRAF4    | 64750  | SMURF2    | L |
| 9623 | TCL1B    | 30000  | TNPO2     | S |
| 9627 | SNCAIP   | 10044  | SH2D3C    | S |
| 9627 | SNCAIP   | 51608  | C7orf20   | S |
| 9628 | RGS6     | 11075  | STMN2     | L |
| 9628 | RGS6     | 55929  | DMAP1     | L |
| 9632 | SEC24C   | 10483  | SEC23B    | R |
| 9632 | SEC24C   | 10484  | SEC23A    | L |
| 9636 | G1P2     | 11274  | USP18     | R |
| 9638 | FEZ1     | 9804   | TOMM20    | S |
| 9638 | FEZ1     | 10081  | PDCD7     | S |
| 9638 | FEZ1     | 10190  | TXNDC9    | S |
| 9638 | FEZ1     | 10519  | CIB1      | L |
| 9638 | FEZ1     | 27185  | DISC1     | L |
| 9638 | FEZ1     | 27336  | HTATSF1   | S |
| 9638 | FEZ1     | 51025  | Magmas    | S |
| 9638 | FEZ1     | 54919  | FLJ20397  | S |
| 9638 | FEZ1     | 56944  | OLFML3    | S |
| 9638 | FEZ1     | 57223  | SMEK2     | S |
| 9638 | FEZ1     | 79866  | FLJ22624  | S |
| 9638 | FEZ1     | 129563 | MGC42174  | S |
| 9641 | IKBKE    | 10010  | TANK      | L |
| 9647 | PPM1F    | 84140  | FLJ13305  | S |
| 9659 | PDE4DIP  | 57473  | GM632     | L |
| 9685 | ENTH     | 23062  | GGA2      | L |
| 9694 | KIAA0103 | 10328  | COX4NB    | R |
| 9694 | KIAA0103 | 51016  | C14orf122 | R |
| 9699 | RIMS2    | 10567  | RABAC1    | L |
| 9699 | RIMS2    | 11069  | RAPGEF4   | L |
| 9699 | RIMS2    | 115827 | RAB3C     | L |
| 9704 | DHX34    | 23649  | POLA2     | S |
| 9706 | ULK2     | 9869   | SETDB1    | S |
| 9706 | ULK2     | 23649  | POLA2     | S |
| 9706 | ULK2     | 51631  | LUC7L2    | S |
| 9709 | HERPUD1  | 57519  | STARD9    | S |
| 9721 | KIAA0514 | 10253  | SPRY2     | R |
| 9721 | KIAA0514 | 83755  | KRTAP4-12 | R |
| 9721 | KIAA0514 | 140735 | Dic2      | R |
| 9726 | ZNF646   | 22981  | KIAA0980  | R |
| 9728 | KIAA0256 | 55729  | ATF7IP    | L |
| 9729 | KIAA0408 | 10174  | SORBS3    | R |

|      |          |        |             |   |
|------|----------|--------|-------------|---|
| 9729 | KIAA0408 | 11007  | DIPA        | R |
| 9729 | KIAA0408 | 29911  | HOOK2       | R |
| 9729 | KIAA0408 | 51225  | ABI3        | R |
| 9729 | KIAA0408 | 55722  | Cep72       | R |
| 9729 | KIAA0408 | 56159  | TEX11       | R |
| 9729 | KIAA0408 | 57596  | KIAA1446    | R |
| 9729 | KIAA0408 | 64170  | CARD9       | R |
| 9733 | SART3    | 10921  | RNPS1       | L |
| 9734 | HDAC9    | 9759   | HDAC4       | L |
| 9734 | HDAC9    | 23309  | SIN3B       | L |
| 9734 | HDAC9    | 23468  | CBX5        | L |
| 9734 | HDAC9    | 25942  | SIN3A       | L |
| 9737 | GPRASP1  | 10249  | GLYAT       | S |
| 9737 | GPRASP1  | 10342  | TFG         | S |
| 9737 | GPRASP1  | 10542  | HBXIP       | S |
| 9737 | GPRASP1  | 11075  | STMN2       | S |
| 9737 | GPRASP1  | 22823  | MTF2        | S |
| 9737 | GPRASP1  | 23557  | SNAPAP      | S |
| 9737 | GPRASP1  | 51236  | C8orf30A    | S |
| 9737 | GPRASP1  | 55700  | RPRC1       | S |
| 9737 | GPRASP1  | 55872  | PBK         | S |
| 9737 | GPRASP1  | 65265  | C8orf33     | S |
| 9737 | GPRASP1  | 79756  | (null)      | S |
| 9741 | LAPTM4A  | 10381  | TUBB3       | S |
| 9744 | CENTB1   | 25900  | HOM-TES-103 | R |
| 9747 | KIAA0738 | 10262  | SF3B4       | R |
| 9747 | KIAA0738 | 30008  | EFEMP2      | R |
| 9757 | MLL4     | 57473  | GM632       | L |
| 9759 | HDAC4    | 23468  | CBX5        | L |
| 9759 | HDAC4    | 54880  | BCOR        | L |
| 9765 | ZFYVE16  | 10043  | TOM1        | L |
| 9765 | ZFYVE16  | 26994  | RNF11       | L |
| 9775 | DDX48    | 51244  | C3orf19     | R |
| 9778 | KIAA0232 | 54978  | C2orf18     | S |
| 9779 | TBC1D5   | 11345  | GABARAPL2   | R |
| 9785 | DHX38    | 51362  | CDC40       | L |
| 9789 | SPCS2    | 50861  | STMN3       | S |
| 9789 | SPCS2    | 79736  | C17orf42    | S |
| 9796 | PHYHIP   | 10397  | NDRG1       | S |
| 9796 | PHYHIP   | 10419  | SKB1        | S |
| 9796 | PHYHIP   | 10450  | PPIE        | S |
| 9796 | PHYHIP   | 10980  | COPS6       | S |
| 9796 | PHYHIP   | 11161  | C14orf1     | S |
| 9796 | PHYHIP   | 20924  | (null)      | S |
| 9796 | PHYHIP   | 23140  | ZZEF1       | S |
| 9796 | PHYHIP   | 57104  | PNPLA2      | S |
| 9796 | PHYHIP   | 79885  | HDAC11      | S |
| 9796 | PHYHIP   | 81557  | MAGED4      | S |
| 9796 | PHYHIP   | 92342  | C1orf156    | S |
| 9796 | PHYHIP   | 112840 | C14orf150   | S |
| 9796 | PHYHIP   | 112950 | MED8        | S |
| 9796 | PHYHIP   | 131408 | MGC21688    | S |
| 9796 | PHYHIP   | 374923 | (null)      | S |
| 9802 | DAZAP2   | 10241  | NDP52       | R |
| 9802 | DAZAP2   | 10254  | STAM2       | R |
| 9802 | DAZAP2   | 10422  | UBADC1      | R |
| 9802 | DAZAP2   | 11030  | RBPMS       | R |
| 9802 | DAZAP2   | 11059  | WWP1        | R |
| 9802 | DAZAP2   | 11201  | POLI        | R |
| 9802 | DAZAP2   | 23543  | RBM9        | R |
| 9802 | DAZAP2   | 23578  | (null)      | R |
| 9802 | DAZAP2   | 26086  | GPSM1       | R |
| 9802 | DAZAP2   | 26574  | AATF        | R |
| 9802 | DAZAP2   | 51545  | ZNF581      | R |
| 9802 | DAZAP2   | 54165  | DCUN1D1     | R |
| 9802 | DAZAP2   | 54472  | TOLLIP      | R |
| 9802 | DAZAP2   | 54855  | FAM46C      | R |

|      |          |        |               |   |
|------|----------|--------|---------------|---|
| 9802 | DAZAP2   | 54932  | FLJ20433      | R |
| 9802 | DAZAP2   | 64750  | SMURF2        | L |
| 9802 | DAZAP2   | 79050  | NOC4L         | R |
| 9802 | DAZAP2   | 83459  | DKFZP761H1710 | R |
| 9802 | DAZAP2   | 84528  | PEPP-2        | R |
| 9802 | DAZAP2   | 84970  | C1orf94       | R |
| 9802 | DAZAP2   | 90060  | JM11          | R |
| 9802 | DAZAP2   | 116071 | MGC20410      | R |
| 9802 | DAZAP2   | 130617 | ZFAND2B       | R |
| 9804 | TOMM20   | 51535  | PPHLN1        | S |
| 9804 | TOMM20   | 56993  | TOMM22        | L |
| 9804 | TOMM20   | 57562  | KIAA1377      | S |
| 9804 | TOMM20   | 79577  | CDC73         | S |
| 9807 | IHPK1    | 23016  | EXOSC7        | R |
| 9808 | KIAA0087 | 54978  | C2orf18       | S |
| 9810 | RNF40    | 26036  | ZNF451        | R |
| 9810 | RNF40    | 84767  | TRIM51        | R |
| 9814 | SFI1     | 55698  | FLJ10324      | R |
| 9817 | KEAP1    | 55603  | FAM46A        | L |
| 9818 | NUPL1    | 23636  | NUP62         | L |
| 9820 | CUL7     | 23291  | FBXW11        | L |
| 9825 | SPATA2   | 55722  | Cep72         | R |
| 9826 | ARHGEF11 | 10672  | GNA13         | L |
| 9832 | KIAA0555 | 23650  | TRIM29        | R |
| 9839 | ZFHX1B   | 10980  | COPS6         | S |
| 9842 | PLEKHM1  | 25843  | PREI3         | S |
| 9842 | PLEKHM1  | 79756  | (null)        | S |
| 9844 | ELMO1    | 23210  | PTDSR         | L |
| 9846 | GAB2     | 27040  | LAT           | L |
| 9849 | ZNF518   | 55729  | ATF7IP        | L |
| 9869 | SETDB1   | 9921   | RNF10         | S |
| 9869 | SETDB1   | 10036  | CHAF1A        | L |
| 9869 | SETDB1   | 10140  | TOB1          | S |
| 9869 | SETDB1   | 10155  | TRIM28        | L |
| 9869 | SETDB1   | 10190  | TXNDC9        | S |
| 9869 | SETDB1   | 10301  | DLEU1         | S |
| 9869 | SETDB1   | 10571  | SMA3          | S |
| 9869 | SETDB1   | 10626  | TRIM16        | S |
| 9869 | SETDB1   | 10991  | SLC38A3       | S |
| 9869 | SETDB1   | 23028  | AOF2          | S |
| 9869 | SETDB1   | 23309  | SIN3B         | L |
| 9869 | SETDB1   | 23435  | TARDBP        | S |
| 9869 | SETDB1   | 23649  | POLA2         | S |
| 9869 | SETDB1   | 25843  | PREI3         | S |
| 9869 | SETDB1   | 25934  | NIPSNAP3A     | S |
| 9869 | SETDB1   | 25942  | SIN3A         | L |
| 9869 | SETDB1   | 28620  | TRBV2         | S |
| 9869 | SETDB1   | 29903  | HSU79303      | S |
| 9869 | SETDB1   | 51295  | SITPEC        | S |
| 9869 | SETDB1   | 54472  | TOLLIP        | S |
| 9869 | SETDB1   | 54810  | GIPC2         | S |
| 9869 | SETDB1   | 55274  | PHF10         | S |
| 9869 | SETDB1   | 55299  | BXDC2         | S |
| 9869 | SETDB1   | 55643  | BTBD2         | S |
| 9869 | SETDB1   | 55729  | ATF7IP        | L |
| 9869 | SETDB1   | 55734  | ZFP64         | S |
| 9869 | SETDB1   | 56144  | PCDHA4        | S |
| 9869 | SETDB1   | 56944  | OLFML3        | S |
| 9869 | SETDB1   | 57332  | CBX8          | S |
| 9869 | SETDB1   | 57664  | PLEKHA4       | S |
| 9869 | SETDB1   | 57761  | TRIB3         | S |
| 9869 | SETDB1   | 64776  | C11orf1       | S |
| 9869 | SETDB1   | 65080  | MRPL44        | S |
| 9869 | SETDB1   | 78987  | CRELD1        | S |
| 9869 | SETDB1   | 79753  | SNIP1         | L |
| 9869 | SETDB1   | 79756  | (null)        | S |
| 9869 | SETDB1   | 80228  | C7orf19       | S |

|       |          |        |           |    |
|-------|----------|--------|-----------|----|
| 9869  | SETDB1   | 81890  | QTRT1     | S  |
| 9869  | SETDB1   | 84256  | FLYWCH1   | S  |
| 9869  | SETDB1   | 192111 | MGC5352   | S  |
| 9869  | SETDB1   | 199745 | THAP8     | S  |
| 9869  | SETDB1   | 375078 | (null)    | S  |
| 9871  | SEC24D   | 10483  | SEC23B    | R  |
| 9873  | FCHSD2   | 11007  | DIPA      | R  |
| 9873  | FCHSD2   | 339965 | FLJ25770  | R  |
| 9874  | TLK1     | 25842  | ASF1A     | R  |
| 9878  | C14orf92 | 10114  | HIPK3     | L  |
| 9878  | C14orf92 | 57473  | GM632     | L  |
| 9883  | POM121   | 10087  | COL4A3BP  | R  |
| 9883  | POM121   | 10551  | AGR2      | R  |
| 9883  | POM121   | 11030  | RBPMS     | R  |
| 9883  | POM121   | 55165  | C10orf3   | R  |
| 9883  | POM121   | 56159  | TEX11     | R  |
| 9890  | LPPR4    | 118924 | C10orf4   | S  |
| 9890  | LPPR4    | 162952 | (null)    | S  |
| 9892  | SNAP91   | 10376  | K-ALPHA-1 | L  |
| 9894  | KIAA0683 | 10524  | HTATIP    | S  |
| 9905  | RUTBC1   | 10656  | KHDRBS3   | S  |
| 9905  | RUTBC1   | 54857  | GDPD2     | S  |
| 9905  | RUTBC1   | 54874  | FNBP1L    | S  |
| 9905  | RUTBC1   | 56902  | LOC56902  | S  |
| 9905  | RUTBC1   | 56963  | RGMA      | S  |
| 9905  | RUTBC1   | 67781  | (null)    | S  |
| 9911  | TMCC2    | 53635  | PTOV1     | S  |
| 9912  | KIAA0672 | 51155  | HN1       | S  |
| 9921  | RNF10    | 10813  | UTP14A    | S  |
| 9921  | RNF10    | 55791  | C1orf103  | S  |
| 9921  | RNF10    | 60492  | MDS025    | S  |
| 9925  | ZBTB5    | 11007  | DIPA      | R  |
| 9933  | KIAA0020 | 79803  | HPS6      | S  |
| 9935  | MAFB     | 60468  | BACH2     | L  |
| 9939  | RBM8A    | 10250  | SRRM1     | L  |
| 9939  | RBM8A    | 55110  | FLJ10292  | RL |
| 9939  | RBM8A    | 65110  | UPF3A     | L  |
| 9971  | NR1H4    | 10891  | PPARGC1A  | L  |
| 9972  | NUP153   | 10482  | NXF1      | L  |
| 9972  | NUP153   | 11260  | XPOT      | L  |
| 9972  | NUP153   | 23636  | NUP62     | L  |
| 9972  | NUP153   | 56001  | NXF2      | L  |
| 9972  | NUP153   | 57510  | XPO5      | L  |
| 9972  | NUP153   | 59343  | SENP2     | L  |
| 9978  | RBX1     | 84893  | FBXO18    | L  |
| 9984  | THOC1    | 10189  | THOC4     | L  |
| 9984  | THOC1    | 57187  | THOC2     | L  |
| 9984  | THOC1    | 84321  | THOC3     | L  |
| 9985  | REC8L1   | 27127  | SMC1L2    | L  |
| 9988  | DMTF1    | 55729  | ATF7IP    | L  |
| 9993  | DGCR2    | 64750  | SMURF2    | L  |
| 10010 | TANK     | 11183  | MAP4K5    | L  |
| 10010 | TANK     | 29110  | TBK1      | L  |
| 10010 | TANK     | 80149  | ZC3H12A   | R  |
| 10011 | SRA1     | 65264  | FLJ13855  | S  |
| 10013 | HDAC6    | 22933  | SIRT2     | L  |
| 10013 | HDAC6    | 54880  | BCOR      | L  |
| 10013 | HDAC6    | 79885  | HDAC11    | L  |
| 10014 | HDAC5    | 11337  | GABARAP   | S  |
| 10014 | HDAC5    | 23468  | CBX5      | L  |
| 10014 | HDAC5    | 55806  | HR        | L  |
| 10015 | PDCD6IP  | 10016  | PDCD6     | L  |
| 10015 | PDCD6IP  | 10268  | RAMP3     | S  |
| 10015 | PDCD6IP  | 26994  | RNF11     | L  |
| 10015 | PDCD6IP  | 29082  | CHMP4A    | L  |
| 10015 | PDCD6IP  | 92421  | CHMP4C    | L  |
| 10015 | PDCD6IP  | 128866 | CHMP4B    | L  |

|       |          |        |               |    |
|-------|----------|--------|---------------|----|
| 10016 | PDCD6    | 23578  | (null)        | RL |
| 10016 | PDCD6    | 23593  | HEBP2         | R  |
| 10016 | PDCD6    | 30011  | SH3KBP1       | L  |
| 10016 | PDCD6    | 93487  | C14orf32      | R  |
| 10016 | PDCD6    | 131034 | CPNE4         | L  |
| 10016 | PDCD6    | 221184 | CPNE2         | L  |
| 10036 | CHAF1A   | 10915  | TCERG1        | L  |
| 10036 | CHAF1A   | 10951  | CBX1          | L  |
| 10036 | CHAF1A   | 23468  | CBX5          | L  |
| 10036 | CHAF1A   | 79797  | ZNF408        | L  |
| 10039 | PARP3    | 23075  | SWAP70        | L  |
| 10040 | TOM1L1   | 10403  | KNTC2         | S  |
| 10040 | TOM1L1   | 10630  | PDPN          | S  |
| 10040 | TOM1L1   | 10658  | CUGBP1        | S  |
| 10040 | TOM1L1   | 22931  | RAB18         | S  |
| 10040 | TOM1L1   | 23190  | UBXD2         | S  |
| 10040 | TOM1L1   | 23272  | RAP140        | S  |
| 10040 | TOM1L1   | 23420  | NOMO1         | S  |
| 10040 | TOM1L1   | 27043  | PELP1         | S  |
| 10040 | TOM1L1   | 50813  | COPS7A        | S  |
| 10040 | TOM1L1   | 55280  | CWF19L1       | S  |
| 10040 | TOM1L1   | 57003  | GK001         | S  |
| 10040 | TOM1L1   | 162952 | (null)        | S  |
| 10043 | TOM1     | 54472  | TOLLIP        | L  |
| 10043 | TOM1     | 57473  | GM632         | L  |
| 10044 | SH2D3C   | 10278  | EFS           | R  |
| 10048 | RANBP9   | 27185  | DISC1         | L  |
| 10048 | RANBP9   | 28996  | HIPK2         | L  |
| 10051 | SMC4L1   | 10592  | SMC2L1        | L  |
| 10053 | AP1M2    | 10618  | TGOLN2        | L  |
| 10054 | UBA2     | 10055  | SAE1          | R  |
| 10054 | UBA2     | 55299  | BXDC2         | S  |
| 10059 | DNM1L    | 23410  | SIRT3         | S  |
| 10063 | COX17    | 10980  | COPS6         | S  |
| 10063 | COX17    | 11161  | C14orf1       | S  |
| 10063 | COX17    | 55791  | C1orf103      | S  |
| 10063 | COX17    | 84056  | KATNAL1       | R  |
| 10063 | COX17    | 84060  | DKFZP564O0523 | S  |
| 10063 | COX17    | 222019 | (null)        | S  |
| 10066 | SCAMP2   | 10425  | ARIH2         | S  |
| 10069 | C21orf6  | 10912  | GADD45G       | R  |
| 10069 | C21orf6  | 11269  | DDX19B        | S  |
| 10073 | RNUT1    | 23285  | KIAA1107      | S  |
| 10081 | PDCD7    | 55660  | FBNP3         | L  |
| 10083 | USH1C    | 64072  | CDH23         | L  |
| 10083 | USH1C    | 124590 | USH1G         | L  |
| 10084 | PQBP1    | 11161  | C14orf1       | S  |
| 10084 | PQBP1    | 51003  | MED31         | S  |
| 10084 | PQBP1    | 51729  | WBP11         | L  |
| 10084 | PQBP1    | 55791  | C1orf103      | S  |
| 10087 | COL4A3BP | 10313  | RTN3          | R  |
| 10087 | COL4A3BP | 23421  | ITGB3BP       | R  |
| 10087 | COL4A3BP | 57142  | RTN4          | R  |
| 10093 | ARPC4    | 10094  | ARPC3         | L  |
| 10093 | ARPC4    | 10097  | ACTR2         | L  |
| 10093 | ARPC4    | 10109  | ARPC2         | L  |
| 10093 | ARPC4    | 51497  | TH1L          | S  |
| 10093 | ARPC4    | 55819  | RNF130        | S  |
| 10093 | ARPC4    | 81873  | ARPC5L        | S  |
| 10094 | ARPC3    | 10095  | ARPC1B        | L  |
| 10094 | ARPC3    | 10096  | ACTR3         | L  |
| 10094 | ARPC3    | 10097  | ACTR2         | L  |
| 10094 | ARPC3    | 10109  | ARPC2         | L  |
| 10094 | ARPC3    | 55258  | FLJ10916      | S  |
| 10094 | ARPC3    | 55593  | OTUD5         | S  |
| 10094 | ARPC3    | 116985 | CENTD2        | S  |
| 10095 | ARPC1B   | 10097  | ACTR2         | L  |



|       |          |        |          |   |
|-------|----------|--------|----------|---|
| 10095 | ARPC1B   | 10109  | ARPC2    | L |
| 10096 | ACTR3    | 10109  | ARPC2    | L |
| 10096 | ACTR3    | 10163  | WASF2    | L |
| 10096 | ACTR3    | 10810  | WASF3    | L |
| 10097 | ACTR2    | 10109  | ARPC2    | L |
| 10097 | ACTR2    | 10163  | WASF2    | L |
| 10097 | ACTR2    | 10788  | IQGAP2   | L |
| 10111 | RAD50    | 54386  | TERF2IP  | L |
| 10112 | KIF20A   | 51560  | RAB6B    | L |
| 10114 | HIPK3    | 26508  | HEYL     | L |
| 10114 | HIPK3    | 51427  | ZNF588   | L |
| 10114 | HIPK3    | 55679  | LIMS2    | L |
| 10114 | HIPK3    | 64689  | GORASP1  | L |
| 10126 | DNAL4    | 140735 | Dic2     | R |
| 10127 | ZNF263   | 29922  | NME7     | R |
| 10127 | ZNF263   | 30008  | EFEMP2   | R |
| 10127 | ZNF263   | 51282  | SCAND1   | R |
| 10127 | ZNF263   | 51324  | SPG21    | R |
| 10127 | ZNF263   | 51684  | SUFU     | R |
| 10127 | ZNF263   | 55663  | ZNF446   | R |
| 10127 | ZNF263   | 79666  | PLEKHF2  | R |
| 10127 | ZNF263   | 90933  | TRIM41   | R |
| 10128 | LRPPRC   | 23593  | HEBP2    | L |
| 10128 | LRPPRC   | 27443  | CECR2    | L |
| 10128 | LRPPRC   | 55201  | BPY2IP1  | L |
| 10133 | OPTN     | 26994  | RNF11    | L |
| 10133 | OPTN     | 51019  | CGI-116  | R |
| 10133 | OPTN     | 79735  | TBC1D17  | R |
| 10140 | TOB1     | 22955  | SCMH1    | S |
| 10142 | AKAP9    | 10426  | TUBGCP3  | L |
| 10142 | AKAP9    | 10460  | TACC3    | L |
| 10142 | AKAP9    | 23048  | FNBP1    | L |
| 10152 | ABI2     | 11086  | ADAM29   | L |
| 10152 | ABI2     | 30011  | SH3KBP1  | L |
| 10152 | ABI2     | 51019  | CGI-116  | R |
| 10152 | ABI2     | 53616  | ADAM22   | L |
| 10152 | ABI2     | 54474  | KRT20    | R |
| 10152 | ABI2     | 90410  | IFT20    | R |
| 10155 | TRIM28   | 10168  | ZNF197   | L |
| 10155 | TRIM28   | 10951  | CBX1     | L |
| 10155 | TRIM28   | 23468  | CBX5     | L |
| 10156 | RASA4    | 57136  | C20orf3  | S |
| 10156 | RASA4    | 90861  | C16orf34 | S |
| 10158 | PDZK1IP1 | 10813  | UTP14A   | S |
| 10158 | PDZK1IP1 | 10980  | COPS6    | S |
| 10163 | WASF2    | 10458  | BAIAP2   | L |
| 10163 | WASF2    | 29993  | PACSIN1  | L |
| 10169 | SERF2    | 10197  | PSME3    | R |
| 10169 | SERF2    | 11030  | RBPMS    | R |
| 10169 | SERF2    | 51497  | TH1L     | S |
| 10169 | SERF2    | 84528  | PEPP-2   | R |
| 10174 | SORBS3   | 10278  | EF5      | R |
| 10174 | SORBS3   | 10521  | DDX17    | R |
| 10174 | SORBS3   | 27316  | RBMX     | R |
| 10174 | SORBS3   | 54507  | TSRC1    | R |
| 10174 | SORBS3   | 56243  | KIAA1217 | R |
| 10174 | SORBS3   | 63948  | DMRTB1   | R |
| 10174 | SORBS3   | 79869  | FLJ12529 | R |
| 10179 | RBM7     | 10363  | HMG20A   | R |
| 10179 | RBM7     | 10656  | KHDRBS3  | R |
| 10179 | RBM7     | 11007  | DIPA     | R |
| 10179 | RBM7     | 27316  | RBMX     | R |
| 10181 | RBM5     | 55791  | C1orf103 | S |
| 10188 | TNK2     | 10490  | VT11B    | S |
| 10188 | TNK2     | 55846  | MDS028   | S |
| 10188 | TNK2     | 124925 | SEZ6     | S |
| 10188 | TNK2     | 255426 | RASGEF1C | S |

|       |           |        |               |   |
|-------|-----------|--------|---------------|---|
| 10189 | THOC4     | 10212  | DDX39         | L |
| 10189 | THOC4     | 57187  | THOC2         | L |
| 10189 | THOC4     | 65110  | UPF3A         | L |
| 10189 | THOC4     | 84321  | THOC3         | L |
| 10190 | TXNDC9    | 10989  | IMMT          | S |
| 10190 | TXNDC9    | 28964  | GIT1          | S |
| 10190 | TXNDC9    | 57562  | KIAA1377      | S |
| 10197 | PSME3     | 11033  | CENTA1        | S |
| 10197 | PSME3     | 54819  | ZCCHC10       | R |
| 10197 | PSME3     | 79446  | WDR25         | R |
| 10197 | PSME3     | 79873  | NUDT18        | R |
| 10197 | PSME3     | 284058 | LOC284058     | R |
| 10199 | MPHOSPH10 | 92856  | IMP4          | L |
| 10200 | MPHOSPH6  | 11161  | C14orf1       | S |
| 10200 | MPHOSPH6  | 11244  | ZHX1          | S |
| 10200 | MPHOSPH6  | 26574  | AATF          | L |
| 10200 | MPHOSPH6  | 51429  | SNX9          | L |
| 10200 | MPHOSPH6  | 55791  | C1orf103      | S |
| 10200 | MPHOSPH6  | 64965  | MRPS9         | L |
| 10200 | MPHOSPH6  | 83658  | DNCL2A        | L |
| 10200 | MPHOSPH6  | 84060  | DKFZP564O0523 | S |
| 10200 | MPHOSPH6  | 93663  | ARHGAP18      | L |
| 10204 | NUTF2     | 51631  | LUC7L2        | S |
| 10204 | NUTF2     | 79904  | FLJ11710      | S |
| 10207 | INADL     | 57555  | NLGN2         | L |
| 10209 | EIF1      | 93145  | OLFM2         | S |
| 10210 | TOPORS    | 79753  | SNIP1         | L |
| 10211 | FLOT1     | 10580  | SORBS1        | L |
| 10211 | FLOT1     | 51280  | GOLPH2        | S |
| 10211 | FLOT1     | 58157  | NGB           | L |
| 10212 | DDX39     | 84324  | CIP29         | R |
| 10214 | SSX3      | 117178 | SSX2IP        | L |
| 10219 | KLRG1     | 23484  | LEPROTL1      | R |
| 10228 | STX6      | 57120  | GOPC          | L |
| 10235 | RASGRP2   | 57540  | PTCHD2        | S |
| 10235 | RASGRP2   | 79607  | FLJ21103      | S |
| 10241 | NDP52     | 10922  | FASTK         | R |
| 10241 | NDP52     | 11143  | MYST2         | R |
| 10241 | NDP52     | 11170  | TU3A          | R |
| 10241 | NDP52     | 11201  | POLI          | R |
| 10241 | NDP52     | 11345  | GABARAPL2     | R |
| 10241 | NDP52     | 23578  | (null)        | R |
| 10241 | NDP52     | 23710  | GABARAPL1     | R |
| 10241 | NDP52     | 25804  | LSM4          | R |
| 10241 | NDP52     | 26036  | ZNF451        | R |
| 10241 | NDP52     | 26994  | RNF11         | L |
| 10241 | NDP52     | 27132  | CPNE7         | R |
| 10241 | NDP52     | 27301  | APEX2         | R |
| 10241 | NDP52     | 27332  | ZNF638        | R |
| 10241 | NDP52     | 50628  | GEMIN4        | L |
| 10241 | NDP52     | 51224  | TCEB3B        | R |
| 10241 | NDP52     | 51588  | PIAS4         | R |
| 10241 | NDP52     | 55388  | MCM10         | R |
| 10241 | NDP52     | 55684  | C9orf86       | R |
| 10241 | NDP52     | 55861  | C20orf35      | R |
| 10241 | NDP52     | 58155  | PTBP2         | R |
| 10241 | NDP52     | 79025  | MGC5356       | R |
| 10241 | NDP52     | 79088  | ZNF426        | R |
| 10241 | NDP52     | 79696  | C14orf140     | R |
| 10241 | NDP52     | 79797  | ZNF408        | R |
| 10241 | NDP52     | 80028  | FBXL18        | R |
| 10241 | NDP52     | 80125  | FLJ32855      | R |
| 10241 | NDP52     | 84080  | C16orf48      | R |
| 10241 | NDP52     | 84708  | LNX           | R |
| 10241 | NDP52     | 84759  | PCGF1         | R |
| 10241 | NDP52     | 85302  | FBF1          | R |
| 10241 | NDP52     | 91056  | DKFZp761E198  | R |

|       |        |        |               |    |
|-------|--------|--------|---------------|----|
| 10241 | NDP52  | 94039  | ZNF101        | R  |
| 10241 | NDP52  | 112858 | TP53RK        | R  |
| 10241 | NDP52  | 114822 | RHPN1         | R  |
| 10241 | NDP52  | 164127 | C1orf65       | R  |
| 10241 | NDP52  | 284058 | LOC284058     | R  |
| 10243 | GPHN   | 11337  | GABARAP       | L  |
| 10243 | GPHN   | 23229  | ARHGEF9       | L  |
| 10243 | GPHN   | 23766  | GABARAPL3     | L  |
| 10243 | GPHN   | 140735 | Dic2          | L  |
| 10248 | POP7   | 10556  | RPP30         | L  |
| 10248 | POP7   | 10557  | RPP38         | L  |
| 10248 | POP7   | 10799  | RPP40         | L  |
| 10248 | POP7   | 54913  | RPP25         | L  |
| 10249 | GLYAT  | 84060  | DKFZP564O0523 | S  |
| 10250 | SRRM1  | 10482  | NXF1          | L  |
| 10250 | SRRM1  | 10921  | RNPS1         | L  |
| 10250 | SRRM1  | 23524  | SRRM2         | L  |
| 10250 | SRRM1  | 26019  | UPF2          | L  |
| 10250 | SRRM1  | 65109  | UPF3B         | L  |
| 10253 | SPRY2  | 23624  | CBLC          | L  |
| 10253 | SPRY2  | 54507  | TSRC1         | R  |
| 10253 | SPRY2  | 83755  | KRTAP4-12     | R  |
| 10253 | SPRY2  | 84767  | TRIM51        | R  |
| 10254 | STAM2  | 10617  | STAMPB        | RL |
| 10254 | STAM2  | 26994  | RNF11         | L  |
| 10254 | STAM2  | 54464  | XRN1          | L  |
| 10254 | STAM2  | 83746  | L3MBTL2       | R  |
| 10256 | CNKSRI | 114822 | RHPN1         | L  |
| 10262 | SF3B4  | 10992  | SF3B2         | R  |
| 10262 | SF3B4  | 26039  | SS18L1        | R  |
| 10266 | RAMP2  | 11318  | ADMR          | L  |
| 10266 | RAMP2  | 79924  | ADM2          | L  |
| 10267 | RAMP1  | 79924  | ADM2          | L  |
| 10268 | RAMP3  | 11318  | ADMR          | L  |
| 10268 | RAMP3  | 79924  | ADM2          | L  |
| 10273 | STUB1  | 10657  | KHDRBS1       | S  |
| 10278 | EFS    | 79090  | TRAPPC6A      | R  |
| 10282 | BET1   | 83878  | USHBP1        | R  |
| 10284 | SAP18  | 10320  | ZNFN1A1       | L  |
| 10284 | SAP18  | 10474  | TADA3L        | S  |
| 10284 | SAP18  | 51684  | SUFU          | L  |
| 10284 | SAP18  | 79159  | MGC3731       | S  |
| 10285 | SMNDC1 | 23020  | ASCC3L1       | L  |
| 10287 | RGS19  | 10755  | GIPC1         | L  |
| 10287 | RGS19  | 28962  | OSTM1         | L  |
| 10291 | SF3A1  | 10915  | TCERG1        | L  |
| 10291 | SF3A1  | 10946  | SF3A3         | L  |
| 10297 | APC2   | 22924  | MAPRE3        | L  |
| 10298 | PAK4   | 54815  | GATAD2A       | S  |
| 10300 | KATNB1 | 11104  | KATNA1        | L  |
| 10301 | DLEU1  | 10383  | TUBB2         | S  |
| 10301 | DLEU1  | 10524  | HTATIP        | S  |
| 10301 | DLEU1  | 10813  | UTP14A        | S  |
| 10301 | DLEU1  | 10980  | COPS6         | S  |
| 10301 | DLEU1  | 51003  | MED31         | S  |
| 10301 | DLEU1  | 55207  | ARL10C        | S  |
| 10301 | DLEU1  | 55324  | ABCF3         | S  |
| 10301 | DLEU1  | 57562  | KIAA1377      | S  |
| 10301 | DLEU1  | 60492  | MDS025        | S  |
| 10301 | DLEU1  | 197131 | UBR1          | S  |
| 10302 | SNAPC5 | 10538  | BATF          | R  |
| 10302 | SNAPC5 | 79184  | CXorf53       | R  |
| 10313 | RTN3   | 57142  | RTN4          | R  |
| 10313 | RTN3   | 79666  | PLEKHF2       | R  |
| 10313 | RTN3   | 84067  | DKFZP566M1046 | R  |
| 10318 | TNIP1  | 26994  | RNF11         | L  |
| 10318 | TNIP1  | 286514 | MAGEB18       | R  |

|       |          |        |           |   |
|-------|----------|--------|-----------|---|
| 10320 | ZNFN1A1  | 22807  | ZNFN1A2   | L |
| 10320 | ZNFN1A1  | 23309  | SIN3B     | L |
| 10320 | ZNFN1A1  | 25942  | SIN3A     | L |
| 10320 | ZNFN1A1  | 64375  | ZNFN1A4   | L |
| 10327 | AKR1A1   | 54512  | EXOSC4    | L |
| 10342 | TFG      | 11161  | C14orf1   | S |
| 10342 | TFG      | 54622  | ARFRP2    | S |
| 10342 | TFG      | 57562  | KIAA1377  | S |
| 10360 | NPM3     | 57562  | KIAA1377  | S |
| 10362 | HMG20B   | 10579  | TACC2     | S |
| 10362 | HMG20B   | 11007  | DIPA      | R |
| 10362 | HMG20B   | 24137  | KIF4A     | L |
| 10363 | HMG20A   | 54997  | TSC       | R |
| 10363 | HMG20A   | 55110  | FLJ10292  | R |
| 10365 | KLF2     | 11059  | WWP1      | L |
| 10381 | TUBB3    | 10573  | MRPL28    | S |
| 10381 | TUBB3    | 10657  | KHDRBS1   | S |
| 10381 | TUBB3    | 11337  | GABARAP   | S |
| 10381 | TUBB3    | 23231  | KIAA0746  | S |
| 10381 | TUBB3    | 55023  | PHIP      | S |
| 10381 | TUBB3    | 57662  | KIAA1543  | S |
| 10381 | TUBB3    | 91266  | (null)    | S |
| 10381 | TUBB3    | 171546 | C14orf147 | S |
| 10381 | TUBB3    | 196383 | MGC7036   | S |
| 10381 | TUBB3    | 284004 | FLJ23825  | S |
| 10381 | TUBB3    | 284169 | (null)    | S |
| 10391 | CORO2B   | 162952 | (null)    | S |
| 10392 | CARD4    | 84674  | CARD6     | L |
| 10399 | GNB2L1   | 11269  | DDX19B    | S |
| 10399 | GNB2L1   | 22821  | RASA3     | L |
| 10399 | GNB2L1   | 26986  | PABPC1    | L |
| 10399 | GNB2L1   | 28965  | SLC27A6   | S |
| 10399 | GNB2L1   | 51280  | GOLPH2    | S |
| 10399 | GNB2L1   | 81628  | TSC22D4   | R |
| 10401 | PIAS3    | 55660  | FBNP3     | L |
| 10401 | PIAS3    | 55729  | ATF7IP    | L |
| 10403 | KNTC2    | 26258  | PLDN      | R |
| 10403 | KNTC2    | 51019  | CGI-116   | R |
| 10403 | KNTC2    | 51421  | AMOTL2    | R |
| 10403 | KNTC2    | 57658  | CALCOCO1  | R |
| 10403 | KNTC2    | 59349  | KLHL12    | R |
| 10403 | KNTC2    | 83878  | USHBP1    | R |
| 10411 | RAPGEF3  | 22800  | RRAS2     | L |
| 10413 | YAP1     | 10971  | YWHAQ     | L |
| 10413 | YAP1     | 23558  | WBP2      | L |
| 10413 | YAP1     | 23559  | WBP1      | L |
| 10419 | SKB1     | 29789  | PTD004    | S |
| 10422 | UBADC1   | 11052  | CPSF6     | R |
| 10425 | ARIH2    | 10524  | HTATIP    | S |
| 10425 | ARIH2    | 10813  | UTP14A    | S |
| 10425 | ARIH2    | 27436  | EML4      | S |
| 10425 | ARIH2    | 29062  | HSPC049   | S |
| 10425 | ARIH2    | 57562  | KIAA1377  | S |
| 10425 | ARIH2    | 116985 | CENTD2    | S |
| 10425 | ARIH2    | 147791 | LOC147791 | S |
| 10426 | TUBGCP3  | 27175  | TUBG2     | L |
| 10427 | SEC24B   | 10484  | SEC23A    | L |
| 10430 | NIFIE14  | 51225  | ABI3      | R |
| 10432 | RBM14    | 23054  | NCOA6     | L |
| 10435 | CDC42EP2 | 23433  | RHOQ      | L |
| 10436 | C2F      | 10657  | KHDRBS1   | S |
| 10436 | C2F      | 24142  | NAT6      | S |
| 10436 | C2F      | 54977  | FLJ20551  | S |
| 10440 | TIMM17A  | 10469  | TIMM44    | L |
| 10445 | MCRS1    | 11007  | DIPA      | R |
| 10445 | MCRS1    | 11157  | LSM6      | L |
| 10445 | MCRS1    | 29079  | MED4      | R |

|       |           |        |               |    |
|-------|-----------|--------|---------------|----|
| 10445 | MCRS1     | 51019  | CGI-116       | R  |
| 10445 | MCRS1     | 51729  | WBP11         | R  |
| 10445 | MCRS1     | 54984  | PINX1         | L  |
| 10445 | MCRS1     | 65109  | UPF3B         | L  |
| 10445 | MCRS1     | 79036  | MGC2749       | R  |
| 10445 | MCRS1     | 80817  | KIAA1712      | R  |
| 10445 | MCRS1     | 138046 | LOC138046     | R  |
| 10450 | PPIE      | 56949  | XAB2          | R  |
| 10454 | MAP3K7IP1 | 257397 | TAB3          | L  |
| 10456 | HAX1      | 10788  | IQGAP2        | L  |
| 10456 | HAX1      | 10971  | YWHAQ         | L  |
| 10458 | BAIAP2    | 11161  | C14orf1       | S  |
| 10458 | BAIAP2    | 22941  | SHANK2        | L  |
| 10458 | BAIAP2    | 50944  | SHANK1        | L  |
| 10458 | BAIAP2    | 51517  | NCKIPSD       | R  |
| 10458 | BAIAP2    | 64130  | LIN7B         | L  |
| 10459 | MAD2L2    | 51455  | REV1L         | L  |
| 10466 | COG5      | 25839  | COG4          | L  |
| 10468 | FST       | 83729  | INHBE         | L  |
| 10474 | TADA3L    | 83440  | ADPGK         | S  |
| 10474 | TADA3L    | 83641  | C10orf45      | S  |
| 10474 | TADA3L    | 112869 | LOC112869     | R  |
| 10476 | ATP5H     | 51608  | C7orf20       | S  |
| 10482 | NXF1      | 29107  | NXT1          | RL |
| 10482 | NXF1      | 30000  | TNPO2         | L  |
| 10482 | NXF1      | 55916  | NXT2          | L  |
| 10482 | NXF1      | 55998  | NXF5          | L  |
| 10482 | NXF1      | 65110  | UPF3A         | L  |
| 10486 | CAP2      | 10487  | CAP1          | L  |
| 10486 | CAP2      | 55660  | FNBP3         | L  |
| 10488 | CREB3     | 10513  | APPBP2        | R  |
| 10488 | CREB3     | 55509  | SNFT          | L  |
| 10488 | CREB3     | 84699  | CREB3L3       | L  |
| 10488 | CREB3     | 90993  | CREB3L1       | L  |
| 10488 | CREB3     | 148327 | CREB3L4       | L  |
| 10489 | LRRC41    | 11030  | RBPMS         | R  |
| 10492 | SYNCRIP   | 29974  | ACF           | L  |
| 10492 | SYNCRIP   | 127833 | SYT2          | L  |
| 10494 | STK25     | 11235  | PDCD10        | R  |
| 10495 | COVA1     | 55068  | FLJ10094      | R  |
| 10497 | UNC13B    | 114034 | TOE1          | S  |
| 10513 | APPBP2    | 10607  | TBL3          | R  |
| 10513 | APPBP2    | 23208  | SYT11         | R  |
| 10513 | APPBP2    | 23212  | RRS1          | R  |
| 10513 | APPBP2    | 51510  | CHMP5         | R  |
| 10513 | APPBP2    | 79594  | C1orf166      | R  |
| 10513 | APPBP2    | 81029  | WNT5B         | R  |
| 10513 | APPBP2    | 84219  | WDR24         | R  |
| 10513 | APPBP2    | 113655 | MFSD3         | R  |
| 10513 | APPBP2    | 170261 | ZCCHC12       | R  |
| 10513 | APPBP2    | 220686 | LOC220686     | R  |
| 10513 | APPBP2    | 221458 | C6orf102      | R  |
| 10513 | APPBP2    | 493861 | EID3          | R  |
| 10519 | CIB1      | 10769  | PLK2          | L  |
| 10519 | CIB1      | 51366  | EDD1          | L  |
| 10521 | DDX17     | 51729  | WBP11         | R  |
| 10521 | DDX17     | 84708  | LNX           | R  |
| 10522 | DEAF1     | 26173  | DKFZP586J0619 | S  |
| 10522 | DEAF1     | 84164  | ASCC2         | S  |
| 10524 | HTATIP    | 10574  | CCT7          | S  |
| 10524 | HTATIP    | 10621  | POLR3F        | S  |
| 10524 | HTATIP    | 23557  | SNAPAP        | S  |
| 10524 | HTATIP    | 29903  | HSU79303      | S  |
| 10524 | HTATIP    | 51059  | LOC51059      | S  |
| 10524 | HTATIP    | 51608  | C7orf20       | S  |
| 10524 | HTATIP    | 55755  | CDK5RAP2      | S  |
| 10524 | HTATIP    | 56901  | LOC56901      | S  |

|       |         |        |           |   |
|-------|---------|--------|-----------|---|
| 10524 | HTATIP  | 57332  | CBX8      | S |
| 10524 | HTATIP  | 57664  | PLEKHA4   | S |
| 10524 | HTATIP  | 57761  | TRIB3     | S |
| 10524 | HTATIP  | 65990  | C16orf24  | S |
| 10524 | HTATIP  | 78987  | CRELD1    | S |
| 10524 | HTATIP  | 79676  | FLJ13491  | S |
| 10524 | HTATIP  | 79760  | GEMIN7    | S |
| 10524 | HTATIP  | 266812 | NAP1L5    | S |
| 10524 | HTATIP  | 284169 | (null)    | S |
| 10524 | HTATIP  | 339448 | LOC339448 | S |
| 10524 | HTATIP  | 359845 | MGC45871  | S |
| 10529 | NEBL    | 84665  | MYPN      | L |
| 10534 | SSSCA1  | 22948  | CCT5      | R |
| 10534 | SSSCA1  | 51534  | C6orf55   | R |
| 10534 | SSSCA1  | 79025  | MGC5356   | R |
| 10534 | SSSCA1  | 79050  | NOC4L     | R |
| 10534 | SSSCA1  | 79090  | TRAPPC6A  | R |
| 10534 | SSSCA1  | 80022  | MYO15B    | R |
| 10534 | SSSCA1  | 80125  | FLJ32855  | R |
| 10534 | SSSCA1  | 151254 | ALS2CR11  | R |
| 10537 | UBD     | 51667  | NYREN18   | L |
| 10538 | BATF    | 22809  | ATF5      | L |
| 10538 | BATF    | 55509  | SNFT      | L |
| 10539 | TXNL2   | 25865  | PRKD2     | L |
| 10539 | TXNL2   | 30008  | EFEMP2    | R |
| 10539 | TXNL2   | 54507  | TSRC1     | R |
| 10539 | TXNL2   | 57019  | CIAPIN1   | R |
| 10539 | TXNL2   | 57473  | GM632     | L |
| 10539 | TXNL2   | 65220  | NADK      | R |
| 10539 | TXNL2   | 83755  | KRTAP4-12 | R |
| 10539 | TXNL2   | 118924 | C10orf4   | S |
| 10539 | TXNL2   | 284004 | FLJ23825  | S |
| 10540 | DCTN2   | 23299  | BICD2     | L |
| 10540 | DCTN2   | 51280  | GOLPH2    | S |
| 10540 | DCTN2   | 65108  | MARCKSL1  | L |
| 10541 | ANP32B  | 25885  | POLR1A    | L |
| 10542 | HBXIP   | 10813  | UTP14A    | S |
| 10542 | HBXIP   | 28964  | GIT1      | S |
| 10542 | HBXIP   | 55791  | C1orf103  | S |
| 10542 | HBXIP   | 57562  | KIAA1377  | S |
| 10542 | HBXIP   | 84232  | MAF1      | S |
| 10550 | ARL6IP5 | 84100  | ARL6      | L |
| 10551 | AGR2    | 29117  | BRD7      | S |
| 10551 | AGR2    | 51003  | MED31     | S |
| 10551 | AGR2    | 60492  | MDS025    | S |
| 10556 | RPP30   | 10557  | RPP38     | L |
| 10556 | RPP30   | 10775  | POP4      | L |
| 10556 | RPP30   | 10799  | RPP40     | L |
| 10556 | RPP30   | 10940  | POP1      | L |
| 10556 | RPP30   | 11102  | RPP14     | L |
| 10557 | RPP38   | 10775  | POP4      | L |
| 10557 | RPP38   | 10799  | RPP40     | L |
| 10557 | RPP38   | 10940  | POP1      | L |
| 10563 | CXCL13  | 51554  | CCRL1     | L |
| 10564 | ARFGEF2 | 10565  | ARFGEF1   | L |
| 10564 | ARFGEF2 | 55660  | FNBP3     | L |
| 10566 | AKAP3   | 10672  | GNA13     | L |
| 10567 | RABAC1  | 11266  | DUSP12    | R |
| 10567 | RABAC1  | 22800  | RRAS2     | L |
| 10567 | RABAC1  | 29907  | SNX15     | R |
| 10567 | RABAC1  | 51324  | SPG21     | R |
| 10567 | RABAC1  | 51534  | C6orf55   | R |
| 10567 | RABAC1  | 53916  | RAB4B     | L |
| 10567 | RABAC1  | 55093  | C8orf32   | R |
| 10567 | RABAC1  | 56997  | CABC1     | R |
| 10567 | RABAC1  | 57403  | RAB22A    | L |
| 10567 | RABAC1  | 60491  | NIF3L1    | R |

|       |          |        |                 |    |
|-------|----------|--------|-----------------|----|
| 10567 | RABAC1   | 79666  | PLEKHF2         | R  |
| 10567 | RABAC1   | 79873  | NUDT18          | R  |
| 10567 | RABAC1   | 84067  | DKFZP566M1046   | R  |
| 10567 | RABAC1   | 84708  | LNX             | R  |
| 10567 | RABAC1   | 125170 | SMCR7           | R  |
| 10569 | SLU7     | 11007  | DIPA            | R  |
| 10569 | SLU7     | 53938  | PPIL3           | R  |
| 10570 | DPYSL4   | 56896  | DPYSL5          | L  |
| 10571 | SMA3     | 222019 | (null)          | S  |
| 10572 | SIVA     | 81488  | GRINL1A         | S  |
| 10574 | CCT7     | 51003  | MED31           | S  |
| 10577 | NPC2     | 79947  | DHDDS           | L  |
| 10580 | SORBS1   | 57556  | SEMA6A          | L  |
| 10581 | IFITM2   | 55037  | FLJ20758        | S  |
| 10581 | IFITM2   | 65110  | UPF3A           | L  |
| 10585 | POMT1    | 29954  | POMT2           | L  |
| 10588 | MTHFS    | 81628  | TSC22D4         | R  |
| 10589 | DRAP1    | 51616  | TAF9L           | R  |
| 10589 | DRAP1    | 54107  | POLE3           | R  |
| 10589 | DRAP1    | 55160  | ARHGEF10L       | S  |
| 10594 | PRPF8    | 24148  | C20orf14        | L  |
| 10602 | CDC42EP3 | 23433  | RHOQ            | L  |
| 10605 | PAIP1    | 26986  | PABPC1          | L  |
| 10606 | PAICS    | 25843  | PREI3           | S  |
| 10606 | PAICS    | 79873  | NUDT18          | R  |
| 10606 | PAICS    | 79959  | C18orf9         | R  |
| 10606 | PAICS    | 84708  | LNX             | R  |
| 10607 | TBL3     | 50618  | ITSN2           | S  |
| 10607 | TBL3     | 81605  | C9orf74         | S  |
| 10608 | MXD4     | 140290 | TCP10L          | L  |
| 10611 | PDLIM5   | 56658  | TRIM39          | R  |
| 10615 | SPAG5    | 23557  | SNAPAP          | S  |
| 10618 | TGOLN2   | 25865  | PRKD2           | L  |
| 10618 | TGOLN2   | 84687  | PPP1R9B         | L  |
| 10621 | POLR3F   | 11161  | C14orf1         | S  |
| 10621 | POLR3F   | 55791  | C1orf103        | S  |
| 10621 | POLR3F   | 112840 | C14orf150       | S  |
| 10628 | TXNIP    | 64750  | SMURF2          | L  |
| 10640 | SEC10L1  | 149371 | EXOC8           | L  |
| 10656 | KHDRBS3  | 10657  | KHDRBS1         | L  |
| 10656 | KHDRBS3  | 22893  | BAHD1           | R  |
| 10656 | KHDRBS3  | 27316  | RBMX            | R  |
| 10656 | KHDRBS3  | 79797  | ZNF408          | R  |
| 10656 | KHDRBS3  | 79873  | NUDT18          | R  |
| 10656 | KHDRBS3  | 80125  | FLJ32855        | R  |
| 10656 | KHDRBS3  | 84708  | LNX             | R  |
| 10656 | KHDRBS3  | 202559 | KHDRBS2         | R  |
| 10657 | KHDRBS1  | 23360  | FNBP4           | L  |
| 10657 | KHDRBS1  | 91746  | YT521           | L  |
| 10657 | KHDRBS1  | 284169 | (null)          | S  |
| 10659 | CUGBP2   | 29974  | ACF             | L  |
| 10670 | RRAGA    | 55035  | NOL8            | L  |
| 10670 | RRAGA    | 58528  | RRAGD           | L  |
| 10670 | RRAGA    | 64121  | RRAGC           | RL |
| 10672 | GNA13    | 23365  | ARHGEF12        | L  |
| 10673 | TNFSF13B | 23495  | TNFRSF13B       | L  |
| 10673 | TNFSF13B | 115650 | TNFRSF13C       | L  |
| 10673 | TNFSF13B | 407977 | TNFSF12-TNFSF13 | L  |
| 10675 | CSPG5    | 57120  | GOPC            | L  |
| 10681 | GNB5     | 93145  | OLFM2           | S  |
| 10691 | GMEB1    | 55729  | ATF7IP          | L  |
| 10691 | GMEB1    | 79753  | SNIP1           | L  |
| 10728 | PTGES3   | 22820  | COPG            | L  |
| 10728 | PTGES3   | 26958  | COPG2           | L  |
| 10733 | PLK4     | 23281  | KIAA0774        | R  |
| 10733 | PLK4     | 54855  | FAM46C          | R  |
| 10734 | STAG3    | 27127  | SMC1L2          | L  |

|       |         |        |               |   |
|-------|---------|--------|---------------|---|
| 10742 | RAI2    | 54557  | SGTB          | R |
| 10743 | RAI1    | 54997  | TSC           | R |
| 10749 | KIF1C   | 11099  | PTPN21        | L |
| 10750 | GRAP    | 27040  | LAT           | L |
| 10755 | GIPC1   | 23095  | KIF1B         | L |
| 10755 | GIPC1   | 54910  | SEMA4C        | L |
| 10755 | GIPC1   | 79797  | ZNF408        | L |
| 10766 | TOB2    | 29883  | CNOT7         | L |
| 10771 | ZMYND11 | 56946  | C11orf30      | L |
| 10772 | FUSIP1  | 29896  | TRA2A         | L |
| 10773 | ZNF482  | 55729  | ATF7IP        | L |
| 10775 | POP4    | 10940  | POP1          | L |
| 10775 | POP4    | 51367  | POP5          | L |
| 10775 | POP4    | 54913  | RPP25         | L |
| 10783 | NEK6    | 11007  | DIPA          | R |
| 10783 | NEK6    | 54550  | EFCBP2        | R |
| 10783 | NEK6    | 91754  | NEK9          | L |
| 10787 | NCKAP1  | 23268  | DNMBP         | L |
| 10801 | SEPT9   | 10890  | RAB10         | S |
| 10801 | SEPT9   | 23157  | SEPT6         | L |
| 10807 | SDCCAG3 | 28964  | GIT1          | S |
| 10813 | UTP14A  | 11007  | DIPA          | R |
| 10813 | UTP14A  | 22981  | KIAA0980      | R |
| 10813 | UTP14A  | 23641  | LDOC1         | R |
| 10813 | UTP14A  | 27258  | LSM3          | S |
| 10813 | UTP14A  | 29903  | HSU79303      | S |
| 10813 | UTP14A  | 29911  | HOOK2         | R |
| 10813 | UTP14A  | 51319  | RSRC1         | S |
| 10813 | UTP14A  | 55274  | PHF10         | S |
| 10813 | UTP14A  | 55339  | WDR33         | S |
| 10813 | UTP14A  | 64129  | TINAGL1       | S |
| 10813 | UTP14A  | 64400  | FTS           | S |
| 10813 | UTP14A  | 80321  | Cep70         | R |
| 10846 | PDE10A  | 10885  | WDR3          | S |
| 10847 | SRCAP   | 79065  | ATG9A         | S |
| 10856 | RUVBL2  | 25911  | RP11-529I10.4 | R |
| 10881 | ACTL7A  | 26136  | TES           | L |
| 10898 | CPSF4   | 56996  | SLC12A9       | L |
| 10898 | CPSF4   | 81608  | FIP1L1        | R |
| 10900 | RPIP8   | 29844  | TFPT          | R |
| 10907 | TXNL4A  | 121268 | RHEBL1        | R |
| 10912 | GADD45G | 90480  | GADD45GIP1    | L |
| 10913 | EDAR    | 128178 | EDARADD       | L |
| 10915 | TCERG1  | 10946  | SF3A3         | L |
| 10915 | TCERG1  | 10992  | SF3B2         | L |
| 10915 | TCERG1  | 11338  | U2AF2         | L |
| 10915 | TCERG1  | 23451  | SF3B1         | L |
| 10919 | EHMT2   | 11278  | KLF12         | R |
| 10919 | EHMT2   | 26148  | C10orf12      | R |
| 10919 | EHMT2   | 57473  | GM632         | L |
| 10919 | EHMT2   | 80125  | FLJ32855      | R |
| 10919 | EHMT2   | 80764  | THAP7         | R |
| 10919 | EHMT2   | 84708  | LNx           | R |
| 10919 | EHMT2   | 84726  | KIAA0515      | R |
| 10922 | FASTK   | 11030  | RBPMS         | R |
| 10923 | SUB1    | 11033  | CENTA1        | L |
| 10923 | SUB1    | 11036  | ALF           | L |
| 10926 | ASK     | 11200  | CHEK2         | L |
| 10926 | ASK     | 51691  | LSM8          | L |
| 10928 | RALBP1  | 29911  | HOOK2         | R |
| 10933 | MORF4L1 | 114932 | MRFAP1L1      | R |
| 10940 | POP1    | 54913  | RPP25         | L |
| 10945 | KDELR1  | 55738  | ARFGAP1       | L |
| 10946 | SF3A3   | 11007  | DIPA          | R |
| 10946 | SF3A3   | 11033  | CENTA1        | L |
| 10951 | CBX1    | 11335  | CBX3          | L |
| 10951 | CBX1    | 23468  | CBX5          | L |



|       |         |        |               |   |
|-------|---------|--------|---------------|---|
| 10951 | CBX1    | 55791  | C1orf103      | S |
| 10951 | CBX1    | 56946  | C11orf30      | L |
| 10952 | SEC61B  | 11231  | SEC63         | L |
| 10952 | SEC61B  | 84100  | ARL6          | L |
| 10953 | TOMM34  | 55929  | DMAP1         | L |
| 10956 | OS9     | 57473  | GM632         | L |
| 10963 | STIP1   | 11140  | CDC37         | L |
| 10963 | STIP1   | 51182  | HSPA14        | L |
| 10970 | CKAP4   | 84164  | ASCC2         | S |
| 10971 | YWHAQ   | 60491  | NIF3L1        | L |
| 10979 | PLEKHC1 | 54751  | FBLIM1        | L |
| 10980 | COPS6   | 11243  | PMF1          | S |
| 10980 | COPS6   | 26100  | WIPI-2        | S |
| 10980 | COPS6   | 26292  | MYCBP         | S |
| 10980 | COPS6   | 29903  | HSU79303      | S |
| 10980 | COPS6   | 55643  | BTBD2         | S |
| 10980 | COPS6   | 55700  | RPRC1         | S |
| 10980 | COPS6   | 57761  | TRIB3         | S |
| 10980 | COPS6   | 78987  | CRELD1        | S |
| 10980 | COPS6   | 79641  | FLJ22386      | S |
| 10980 | COPS6   | 79756  | (null)        | S |
| 10980 | COPS6   | 80228  | C7orf19       | S |
| 10980 | COPS6   | 81890  | QTRT1         | S |
| 10980 | COPS6   | 83931  | STK40         | S |
| 10980 | COPS6   | 84103  | C4orf17       | S |
| 10980 | COPS6   | 129563 | MGC42174      | S |
| 10980 | COPS6   | 339448 | LOC339448     | S |
| 10980 | COPS6   | 375078 | (null)        | S |
| 10982 | MAPRE2  | 22924  | MAPRE3        | R |
| 10982 | MAPRE2  | 60491  | NIF3L1        | R |
| 10987 | COPS5   | 11236  | RNF139        | L |
| 10989 | IMMT    | 11079  | RER1          | S |
| 10989 | IMMT    | 22948  | CCT5          | S |
| 10989 | IMMT    | 23028  | AOF2          | S |
| 10989 | IMMT    | 23557  | SNAPAP        | S |
| 10989 | IMMT    | 23659  | LYPLA3        | S |
| 10989 | IMMT    | 25934  | NIPSNAP3A     | S |
| 10989 | IMMT    | 29070  | HSPC065       | S |
| 10989 | IMMT    | 51295  | SITPEC        | S |
| 10989 | IMMT    | 51566  | ARMCX3        | S |
| 10989 | IMMT    | 51593  | ARS2          | S |
| 10989 | IMMT    | 54949  | FLJ20487      | S |
| 10989 | IMMT    | 55355  | DKFZp762E1312 | S |
| 10989 | IMMT    | 64400  | FTS           | S |
| 10989 | IMMT    | 65080  | MRPL44        | S |
| 10989 | IMMT    | 65990  | C16orf24      | S |
| 10989 | IMMT    | 80007  | C10orf88      | S |
| 10989 | IMMT    | 81551  | STMN4         | S |
| 10989 | IMMT    | 84164  | ASCC2         | S |
| 10992 | SF3B2   | 23451  | SF3B1         | L |
| 11007 | DIPA    | 11067  | C10orf10      | R |
| 11007 | DIPA    | 11170  | TU3A          | R |
| 11007 | DIPA    | 23265  | EXOC7         | R |
| 11007 | DIPA    | 23270  | TSPYL4        | R |
| 11007 | DIPA    | 23641  | LDOC1         | R |
| 11007 | DIPA    | 25843  | PREI3         | R |
| 11007 | DIPA    | 26150  | RIBC2         | R |
| 11007 | DIPA    | 26152  | ZNF337        | R |
| 11007 | DIPA    | 26240  | FAM50B        | R |
| 11007 | DIPA    | 27018  | NGFRAP1       | R |
| 11007 | DIPA    | 27229  | 76P           | R |
| 11007 | DIPA    | 27301  | APEX2         | R |
| 11007 | DIPA    | 27332  | ZNF638        | R |
| 11007 | DIPA    | 51138  | COPS4         | R |
| 11007 | DIPA    | 51207  | DUSP13        | R |
| 11007 | DIPA    | 51562  | MBIP          | R |
| 11007 | DIPA    | 51760  | SYT17         | R |

|       |      |        |           |   |
|-------|------|--------|-----------|---|
| 11007 | DIPA | 53371  | NUP54     | R |
| 11007 | DIPA | 54149  | C21orf91  | R |
| 11007 | DIPA | 54474  | KRT20     | R |
| 11007 | DIPA | 54883  | FLJ20291  | R |
| 11007 | DIPA | 54906  | C10orf18  | R |
| 11007 | DIPA | 54927  | CHCHD3    | R |
| 11007 | DIPA | 55109  | AGGF1     | R |
| 11007 | DIPA | 55122  | C6orf166  | R |
| 11007 | DIPA | 55209  | FLJ10707  | R |
| 11007 | DIPA | 55233  | MOBK1B    | R |
| 11007 | DIPA | 55285  | FLJ11016  | R |
| 11007 | DIPA | 55367  | LRDD      | R |
| 11007 | DIPA | 55388  | MCM10     | R |
| 11007 | DIPA | 55565  | LOC55565  | R |
| 11007 | DIPA | 55813  | C17orf40  | R |
| 11007 | DIPA | 55816  | DOK5      | R |
| 11007 | DIPA | 55885  | LMO3      | R |
| 11007 | DIPA | 57326  | PBXIP1    | R |
| 11007 | DIPA | 58500  | ZNF250    | R |
| 11007 | DIPA | 60491  | NIF3L1    | R |
| 11007 | DIPA | 60493  | FLJ13149  | R |
| 11007 | DIPA | 64112  | MOAP1     | R |
| 11007 | DIPA | 64170  | CARD9     | R |
| 11007 | DIPA | 64376  | ZNFN1A5   | R |
| 11007 | DIPA | 64769  | C1orf149  | R |
| 11007 | DIPA | 79005  | SCNM1     | R |
| 11007 | DIPA | 79025  | MGC5356   | R |
| 11007 | DIPA | 79088  | ZNF426    | R |
| 11007 | DIPA | 79571  | GCC1      | R |
| 11007 | DIPA | 79666  | PLEKHF2   | R |
| 11007 | DIPA | 79696  | C14orf140 | R |
| 11007 | DIPA | 79843  | FLJ22746  | R |
| 11007 | DIPA | 80125  | FLJ32855  | R |
| 11007 | DIPA | 80256  | KIAA1539  | R |
| 11007 | DIPA | 80321  | Cep70     | R |
| 11007 | DIPA | 80764  | THAP7     | R |
| 11007 | DIPA | 84080  | C16orf48  | R |
| 11007 | DIPA | 84260  | MGC10854  | R |
| 11007 | DIPA | 84310  | MGC11257  | R |
| 11007 | DIPA | 84445  | LZTS2     | R |
| 11007 | DIPA | 84707  | BEX2      | R |
| 11007 | DIPA | 84708  | LNX       | R |
| 11007 | DIPA | 85302  | FBF1      | R |
| 11007 | DIPA | 90060  | JM11      | R |
| 11007 | DIPA | 92595  | MGC13138  | R |
| 11007 | DIPA | 94121  | SYTL4     | R |
| 11007 | DIPA | 138046 | LOC138046 | R |
| 11007 | DIPA | 147687 | ZNF417    | R |
| 11007 | DIPA | 148223 | C19orf25  | R |
| 11007 | DIPA | 149371 | EXOC8     | R |
| 11007 | DIPA | 151254 | ALS2CR11  | R |
| 11007 | DIPA | 151613 | TTC14     | R |
| 11007 | DIPA | 153733 | MGC39633  | R |
| 11007 | DIPA | 157773 | C8orf48   | R |
| 11007 | DIPA | 159989 | FLJ25393  | R |
| 11007 | DIPA | 164127 | C1orf65   | R |
| 11007 | DIPA | 164592 | FLJ36046  | R |
| 11007 | DIPA | 170082 | MGC17403  | R |
| 11007 | DIPA | 196441 | MGC23401  | R |
| 11007 | DIPA | 220136 | CCDC11    | R |
| 11007 | DIPA | 220965 | FAM13C1   | R |
| 11007 | DIPA | 284058 | LOC284058 | R |
| 11007 | DIPA | 284680 | C1orf111  | R |
| 11007 | DIPA | 286301 | MGC42630  | R |
| 11009 | IL24 | 53832  | IL20RA    | L |
| 11016 | ATF7 | 55509  | SNFT      | L |
| 11016 | ATF7 | 60468  | BACH2     | L |

|       |          |        |               |   |
|-------|----------|--------|---------------|---|
| 11020 | RABL4    | 51668  | C1orf41       | R |
| 11021 | RAB35    | 80304  | FLJ21945      | S |
| 11030 | RBPMS    | 11135  | CDC42EP1      | R |
| 11030 | RBPMS    | 23199  | KIAA0182      | R |
| 11030 | RBPMS    | 23543  | RBM9          | R |
| 11030 | RBPMS    | 23583  | SMUG1         | R |
| 11030 | RBPMS    | 26505  | CNNM3         | R |
| 11030 | RBPMS    | 26508  | HEYL          | R |
| 11030 | RBPMS    | 51545  | ZNF581        | R |
| 11030 | RBPMS    | 54472  | TOLLIP        | R |
| 11030 | RBPMS    | 55342  | STRBP         | R |
| 11030 | RBPMS    | 55684  | C9orf86       | R |
| 11030 | RBPMS    | 64333  | ARHGAP9       | R |
| 11030 | RBPMS    | 83640  | MGC2560       | R |
| 11030 | RBPMS    | 84080  | C16orf48      | R |
| 11030 | RBPMS    | 84445  | LZTS2         | R |
| 11030 | RBPMS    | 84528  | PEPP-2        | R |
| 11030 | RBPMS    | 84872  | ZC3H10        | R |
| 11030 | RBPMS    | 84904  | C9orf100      | R |
| 11030 | RBPMS    | 84970  | C1orf94       | R |
| 11030 | RBPMS    | 113878 | DTX2          | R |
| 11030 | RBPMS    | 129807 | NEU4          | R |
| 11030 | RBPMS    | 196477 | C12orf12      | R |
| 11030 | RBPMS    | 200523 | FLJ25369      | R |
| 11035 | RIPK3    | 148022 | TICAM1        | L |
| 11040 | PIM2     | 51076  | CUTC          | R |
| 11040 | PIM2     | 84893  | FBXO18        | S |
| 11043 | MID2     | 143241 | DYDC1         | R |
| 11051 | NUDT21   | 11052  | CPSF6         | R |
| 11051 | NUDT21   | 57562  | KIAA1377      | S |
| 11051 | NUDT21   | 60491  | NIF3L1        | R |
| 11051 | NUDT21   | 79869  | FLJ12529      | R |
| 11051 | NUDT21   | 84060  | DKFZP564O0523 | S |
| 11051 | NUDT21   | 118460 | EXOSC6        | L |
| 11052 | CPSF6    | 11059  | WWP1          | R |
| 11052 | CPSF6    | 11060  | WWP2          | R |
| 11052 | CPSF6    | 51585  | PCF11         | L |
| 11052 | CPSF6    | 54826  | FLJ20125      | R |
| 11052 | CPSF6    | 59349  | KLHL12        | R |
| 11052 | CPSF6    | 79637  | ARMC7         | R |
| 11059 | WWP1     | 23559  | WBP1          | L |
| 11059 | WWP1     | 26994  | RNF11         | L |
| 11059 | WWP1     | 27332  | ZNF638        | R |
| 11059 | WWP1     | 85362  | (null)        | R |
| 11060 | WWP2     | 23559  | WBP1          | L |
| 11060 | WWP2     | 26994  | RNF11         | L |
| 11060 | WWP2     | 85362  | (null)        | R |
| 11063 | SOX30    | 11165  | NUDT3         | R |
| 11063 | SOX30    | 25805  | BAMBI         | R |
| 11065 | UBE2C    | 29882  | ANAPC2        | L |
| 11067 | C10orf10 | 83878  | USHBP1        | R |
| 11069 | RAPGEF4  | 22800  | RRAS2         | L |
| 11075 | STMN2    | 56159  | TEX11         | R |
| 11091 | WDR5     | 51562  | MBIP          | R |
| 11092 | C9orf9   | 22929  | SEPHS1        | S |
| 11092 | C9orf9   | 57062  | DDX24         | S |
| 11098 | PRSS23   | 11261  | CHP           | S |
| 11098 | PRSS23   | 23310  | hCAP-D3       | S |
| 11098 | PRSS23   | 23542  | MAPK8IP2      | S |
| 11098 | PRSS23   | 25836  | NIPBL         | S |
| 11098 | PRSS23   | 29127  | RACGAP1       | S |
| 11098 | PRSS23   | 51399  | TRAPPC4       | S |
| 11098 | PRSS23   | 57489  | ODF2L         | S |
| 11098 | PRSS23   | 79050  | NOC4L         | S |
| 11098 | PRSS23   | 79142  | PHF23         | S |
| 11098 | PRSS23   | 84065  | C1orf160      | S |
| 11098 | PRSS23   | 158345 | LOC158345     | S |

|       |          |        |           |    |
|-------|----------|--------|-----------|----|
| 11098 | PRSS23   | 347862 | FLJ34283  | S  |
| 11100 | HNRPUL1  | 11161  | C14orf1   | S  |
| 11100 | HNRPUL1  | 51003  | MED31     | S  |
| 11100 | HNRPUL1  | 55660  | FNBP3     | SL |
| 11102 | RPP14    | 51367  | POP5      | L  |
| 11102 | RPP14    | 84966  | IGSF21    | S  |
| 11113 | CIT      | 27185  | DISC1     | L  |
| 11117 | EMILIN1  | 66036  | MTMR9     | R  |
| 11117 | EMILIN1  | 84034  | EMILIN2   | L  |
| 11124 | FAF1     | 79753  | SNIP1     | L  |
| 11124 | FAF1     | 84164  | ASCC2     | S  |
| 11127 | KIF3A    | 23645  | PPP1R15A  | L  |
| 11129 | SFRS16   | 84528  | PEPP-2    | R  |
| 11135 | CDC42EP1 | 23433  | RHOQ      | L  |
| 11135 | CDC42EP1 | 79109  | MAPKAP1   | R  |
| 11135 | CDC42EP1 | 83755  | KRTAP4-12 | R  |
| 11141 | IL1RAPL1 | 23413  | FREQ      | L  |
| 11143 | MYST2    | 22981  | KIAA0980  | R  |
| 11143 | MYST2    | 23557  | SNAPAP    | S  |
| 11143 | MYST2    | 29911  | HOOK2     | R  |
| 11143 | MYST2    | 29993  | PACSN1    | S  |
| 11143 | MYST2    | 55339  | WDR33     | S  |
| 11143 | MYST2    | 57332  | CBX8      | S  |
| 11143 | MYST2    | 79768  | C15orf29  | S  |
| 11143 | MYST2    | 79886  | C9orf82   | S  |
| 11143 | MYST2    | 80321  | Cep70     | R  |
| 11143 | MYST2    | 127557 | ZBTB8     | R  |
| 11143 | MYST2    | 253980 | KCTD13    | R  |
| 11143 | MYST2    | 374923 | (null)    | S  |
| 11144 | DMC1     | 25788  | RAD54B    | L  |
| 11145 | HRASLS3  | 29979  | UBQLN1    | R  |
| 11146 | GLMN     | 55968  | NSFL1C    | S  |
| 11157 | LSM6     | 23658  | LSM5      | L  |
| 11157 | LSM6     | 25804  | LSM4      | L  |
| 11157 | LSM6     | 27257  | LSM1      | L  |
| 11157 | LSM6     | 27258  | LSM3      | L  |
| 11157 | LSM6     | 51690  | LSM7      | L  |
| 11157 | LSM6     | 51691  | LSM8      | L  |
| 11157 | LSM6     | 57819  | LSM2      | L  |
| 11158 | RABL2B   | 84984  | MGC14126  | R  |
| 11161 | C14orf1  | 11189  | TNRC4     | S  |
| 11161 | C14orf1  | 22929  | SEPHS1    | S  |
| 11161 | C14orf1  | 26151  | NAT9      | S  |
| 11161 | C14orf1  | 27252  | KLHL20    | S  |
| 11161 | C14orf1  | 29903  | HSU79303  | S  |
| 11161 | C14orf1  | 55643  | BTBD2     | S  |
| 11161 | C14orf1  | 55734  | ZFP64     | S  |
| 11161 | C14orf1  | 55755  | CDK5RAP2  | S  |
| 11161 | C14orf1  | 56144  | PCDHA4    | S  |
| 11161 | C14orf1  | 56901  | LOC56901  | S  |
| 11161 | C14orf1  | 57819  | LSM2      | S  |
| 11161 | C14orf1  | 64978  | MRPL38    | S  |
| 11161 | C14orf1  | 219844 | HYLS1     | S  |
| 11165 | NUDT3    | 64284  | RAB17     | S  |
| 11165 | NUDT3    | 79754  | ASB13     | S  |
| 11170 | TU3A     | 22911  | WDR47     | S  |
| 11170 | TU3A     | 22981  | KIAA0980  | R  |
| 11170 | TU3A     | 23641  | LDOC1     | R  |
| 11170 | TU3A     | 29911  | HOOK2     | R  |
| 11170 | TU3A     | 30008  | EFEMP2    | R  |
| 11170 | TU3A     | 57596  | KIAA1446  | R  |
| 11170 | TU3A     | 83755  | KRTAP4-12 | R  |
| 11170 | TU3A     | 83878  | USHBP1    | R  |
| 11171 | STRAP    | 51250  | C6orf203  | S  |
| 11180 | WDR6     | 23580  | CDC42EP4  | R  |
| 11180 | WDR6     | 55632  | KIAA1333  | R  |
| 11184 | MAP4K1   | 28988  | DBNL      | L  |

|       |         |        |           |   |
|-------|---------|--------|-----------|---|
| 11184 | MAP4K1  | 29760  | BLNK      | L |
| 11186 | RASSF1  | 11340  | EXOSC8    | L |
| 11186 | RASSF1  | 83593  | RASSF5    | L |
| 11186 | RASSF1  | 170685 | NUDT10    | S |
| 11189 | TNRC4   | 55084  | FLJ10159  | S |
| 11190 | CEP2    | 55729  | ATF7IP    | L |
| 11194 | ABCB8   | 84273  | C4orf14   | S |
| 11200 | CHEK2   | 80198  | MUS81     | L |
| 11200 | CHEK2   | 83942  | TSSK1     | L |
| 11201 | POLI    | 26994  | RNF11     | L |
| 11201 | POLI    | 51455  | REV1L     | L |
| 11218 | DDX20   | 27161  | EIF2C2    | L |
| 11228 | RASSF8  | 122786 | FRMD6     | R |
| 11243 | PMF1    | 28964  | GIT1      | S |
| 11243 | PMF1    | 51003  | MED31     | S |
| 11243 | PMF1    | 57562  | KIAA1377  | S |
| 11244 | ZHX1    | 23051  | ZHX3      | L |
| 11244 | ZHX1    | 23435  | TARDBP    | S |
| 11244 | ZHX1    | 54472  | TOLLIP    | S |
| 11244 | ZHX1    | 55339  | WDR33     | S |
| 11244 | ZHX1    | 55646  | LYAR      | S |
| 11244 | ZHX1    | 57050  | SAS10     | S |
| 11252 | PACSIN2 | 29763  | PACSIN3   | L |
| 11252 | PACSIN2 | 29993  | PACSIN1   | R |
| 11266 | DUSP12  | 57562  | KIAA1377  | S |
| 11266 | DUSP12  | 114785 | MBD6      | S |
| 11267 | SNF8    | 60491  | NIF3L1    | R |
| 11267 | SNF8    | 84313  | VPS25     | R |
| 11269 | DDX19B  | 23039  | XPO7      | S |
| 11275 | KLHL2   | 59349  | KLHL12    | R |
| 11276 | AP1GBP1 | 23062  | GGA2      | L |
| 11276 | AP1GBP1 | 23163  | GGA3      | L |
| 11277 | TREX1   | 26150  | RIBC2     | R |
| 11277 | TREX1   | 90410  | IFT20     | R |
| 11282 | MGAT4B  | 90678  | LRSAM1    | S |
| 11284 | PNKP    | 58529  | MYOZ1     | R |
| 11284 | PNKP    | 83755  | KRTAP4-12 | R |
| 11313 | LYPLA2  | 22955  | SCMH1     | S |
| 11313 | LYPLA2  | 51003  | MED31     | S |
| 11316 | COPE    | 22820  | COPG      | L |
| 11316 | COPE    | 26958  | COPG2     | L |
| 11331 | PHB2    | 26019  | UPF2      | L |
| 11335 | CBX3    | 23468  | CBX5      | L |
| 11336 | SEC6L1  | 55770  | SEC5L1    | L |
| 11336 | SEC6L1  | 149371 | EXOC8     | L |
| 11337 | GABARAP | 23192  | ATG4B     | S |
| 11337 | GABARAP | 51160  | VPS28     | S |
| 11337 | GABARAP | 51660  | BRP44L    | S |
| 11338 | U2AF2   | 22827  | SIAHBP1   | R |
| 11338 | U2AF2   | 22889  | KIAA0907  | R |
| 11338 | U2AF2   | 23451  | SF3B1     | L |
| 11338 | U2AF2   | 26511  | CHIC2     | R |
| 11338 | U2AF2   | 55145  | THAP1     | R |
| 11338 | U2AF2   | 55660  | FNBP3     | L |
| 11338 | U2AF2   | 151871 | DPPA2     | R |
| 11338 | U2AF2   | 222389 | C10orf30  | R |
| 11338 | U2AF2   | 541468 | C1orf190  | R |
| 11340 | EXOSC8  | 22803  | XRN2      | L |
| 11340 | EXOSC8  | 23608  | MKRN1     | L |
| 11340 | EXOSC8  | 26019  | UPF2      | L |
| 11340 | EXOSC8  | 27257  | LSM1      | L |
| 11340 | EXOSC8  | 29109  | FHOD1     | L |
| 11340 | EXOSC8  | 51013  | EXOSC1    | L |
| 11340 | EXOSC8  | 51690  | LSM7      | L |
| 11340 | EXOSC8  | 54464  | XRN1      | L |
| 11340 | EXOSC8  | 56915  | EXOSC5    | L |
| 11340 | EXOSC8  | 118460 | EXOSC6    | L |

|       |           |        |           |   |
|-------|-----------|--------|-----------|---|
| 11345 | GABARAPL2 | 23192  | ATG4B     | S |
| 11345 | GABARAPL2 | 23786  | BCL2L13   | R |
| 11345 | GABARAPL2 | 79876  | UBE1DC1   | R |
| 11345 | GABARAPL2 | 90678  | LRSAM1    | S |
| 13682 | (null)    | 57062  | DDX24     | S |
| 19241 | (null)    | 55791  | C1orf103  | S |
| 19241 | (null)    | 84966  | IGSF21    | S |
| 20924 | (null)    | 29115  | HCNGP     | S |
| 20924 | (null)    | 51003  | MED31     | S |
| 20924 | (null)    | 51759  | C9orf78   | S |
| 20924 | (null)    | 52432  | (null)    | S |
| 20924 | (null)    | 55827  | IQWD1     | S |
| 20924 | (null)    | 56902  | LOC56902  | S |
| 20924 | (null)    | 57562  | KIAA1377  | S |
| 22796 | COG2      | 25839  | COG4      | L |
| 22796 | COG2      | 83548  | COG3      | L |
| 22800 | RRAS2     | 83593  | RASSF5    | L |
| 22803 | XRN2      | 23256  | SCFD1     | L |
| 22803 | XRN2      | 23435  | TARDBP    | L |
| 22803 | XRN2      | 25976  | TIPARP    | L |
| 22803 | XRN2      | 26019  | UPF2      | L |
| 22803 | XRN2      | 27258  | LSM3      | L |
| 22803 | XRN2      | 27304  | MOCS3     | L |
| 22803 | XRN2      | 51386  | EIF3S6IP  | L |
| 22803 | XRN2      | 54472  | TOLLIP    | L |
| 22806 | ZNFN1A3   | 25942  | SIN3A     | L |
| 22806 | ZNFN1A3   | 64375  | ZNFN1A4   | L |
| 22806 | ZNFN1A3   | 64376  | ZNFN1A5   | L |
| 22807 | ZNFN1A2   | 64375  | ZNFN1A4   | L |
| 22807 | ZNFN1A2   | 64376  | ZNFN1A5   | L |
| 22808 | MRAS      | 51735  | RAPGEF6   | L |
| 22808 | MRAS      | 83593  | RASSF5    | L |
| 22809 | ATF5      | 27185  | DISC1     | L |
| 22809 | ATF5      | 55509  | SNFT      | L |
| 22820 | COPG      | 23433  | RHOQ      | L |
| 22820 | COPG      | 26958  | COPG2     | L |
| 22822 | PHLDA1    | 83755  | KRTAP4-12 | R |
| 22823 | MTF2      | 25865  | PRKD2     | L |
| 22827 | SIAHBP1   | 29115  | HCNGP     | R |
| 22827 | SIAHBP1   | 84988  | PPP1R16A  | S |
| 22827 | SIAHBP1   | 118426 | LOH12CR1  | R |
| 22839 | DLGAP4    | 84152  | PPP1R1B   | S |
| 22841 | RAB11FIP2 | 57111  | RAB25     | L |
| 22841 | RAB11FIP2 | 84440  | RAB11FIP4 | L |
| 22841 | RAB11FIP2 | 85021  | REPS1     | L |
| 22859 | LPHN1     | 50944  | SHANK1    | L |
| 22861 | NALP1     | 58484  | CARD12    | L |
| 22882 | ZHX2      | 23051  | ZHX3      | L |
| 22893 | BAHD1     | 57596  | KIAA1446  | R |
| 22893 | BAHD1     | 83755  | KRTAP4-12 | R |
| 22894 | KIAA1008  | 28989  | AD-003    | L |
| 22899 | ARHGEF15  | 25843  | PREI3     | R |
| 22899 | ARHGEF15  | 79096  | MGC4707   | R |
| 22905 | EPN2      | 26994  | RNF11     | L |
| 22911 | WDR47     | 55743  | CHFR      | S |
| 22913 | RALY      | 284403 | WDR62     | S |
| 22914 | KLRK1     | 79465  | ULBP3     | L |
| 22926 | ATF6      | 58487  | ZF        | L |
| 22927 | HABP4     | 118924 | C10orf4   | S |
| 22929 | SEPHS1    | 54978  | C2orf18   | S |
| 22929 | SEPHS1    | 84966  | IGSF21    | S |
| 22934 | RPIA      | 51534  | C6orf55   | R |
| 22934 | RPIA      | 55093  | C8orf32   | R |
| 22934 | RPIA      | 60491  | NIF3L1    | R |
| 22934 | RPIA      | 84708  | LNX       | R |
| 22938 | SNW1      | 55805  | LRP2BP    | L |
| 22938 | SNW1      | 84164  | ASCC2     | S |

|       |          |        |            |   |
|-------|----------|--------|------------|---|
| 22941 | SHANK2   | 23266  | LPHN2      | L |
| 22943 | DKK1     | 83999  | KREMEN1    | L |
| 22948 | CCT5     | 54464  | XRN1       | L |
| 22948 | CCT5     | 79735  | TBC1D17    | S |
| 22954 | TRIM32   | 29979  | UBQLN1     | R |
| 22955 | SCMH1    | 25843  | PREI3      | S |
| 22955 | SCMH1    | 81488  | GRINL1A    | S |
| 22974 | TPX2     | 284169 | (null)     | S |
| 22976 | PAXIP1   | 127557 | ZBTB8      | R |
| 22978 | NT5C2    | 29922  | NME7       | R |
| 22978 | NT5C2    | 79050  | NOC4L      | R |
| 22978 | NT5C2    | 79817  | MOBKL2B    | R |
| 22978 | NT5C2    | 79873  | NUDT18     | R |
| 22981 | KIAA0980 | 23270  | TSPYL4     | R |
| 22981 | KIAA0980 | 26150  | RIBC2      | R |
| 22981 | KIAA0980 | 27238  | GPKOW      | R |
| 22981 | KIAA0980 | 27301  | APEX2      | R |
| 22981 | KIAA0980 | 51266  | CLEC1B     | R |
| 22981 | KIAA0980 | 51562  | MBIP       | R |
| 22981 | KIAA0980 | 51760  | SYT17      | R |
| 22981 | KIAA0980 | 55388  | MCM10      | R |
| 22981 | KIAA0980 | 55758  | RCOR3      | R |
| 22981 | KIAA0980 | 58500  | ZNF250     | R |
| 22981 | KIAA0980 | 79088  | ZNF426     | R |
| 22981 | KIAA0980 | 79571  | GCC1       | R |
| 22981 | KIAA0980 | 80125  | FLJ32855   | R |
| 22981 | KIAA0980 | 80851  | SH3BP5L    | R |
| 22981 | KIAA0980 | 81576  | MGC10471   | R |
| 22981 | KIAA0980 | 84445  | LZTS2      | R |
| 22981 | KIAA0980 | 84516  | DCTN5      | R |
| 22981 | KIAA0980 | 90678  | LRSAM1     | S |
| 22981 | KIAA0980 | 170082 | MGC17403   | R |
| 22981 | KIAA0980 | 196441 | MGC23401   | R |
| 22981 | KIAA0980 | 220082 | NURIT      | R |
| 22981 | KIAA0980 | 284058 | LOC284058  | R |
| 22985 | ACIN1    | 55295  | FLJ11078   | S |
| 22985 | ACIN1    | 55324  | ABCF3      | S |
| 22985 | ACIN1    | 84280  | BTBD10     | S |
| 22992 | FBXL11   | 57473  | GM632      | L |
| 22995 | Cep152   | 23136  | EPB41L3    | L |
| 22999 | RIMS1    | 25837  | RAB26      | L |
| 22999 | RIMS1    | 26059  | CAST1      | L |
| 23002 | DAAM1    | 55660  | FNBP3      | L |
| 23013 | SPEN     | 53615  | MBD3       | L |
| 23014 | FBXO21   | 85445  | CNTNAP4    | L |
| 23016 | EXOSC7   | 23404  | EXOSC2     | L |
| 23016 | EXOSC7   | 51013  | EXOSC1     | L |
| 23016 | EXOSC7   | 54512  | EXOSC4     | L |
| 23016 | EXOSC7   | 118460 | EXOSC6     | L |
| 23020 | ASCC3L1  | 84466  | MEGF10     | L |
| 23025 | UNC13A   | 23136  | EPB41L3    | L |
| 23028 | AOF2     | 51317  | PHF21A     | L |
| 23028 | AOF2     | 60492  | MDS025     | S |
| 23028 | AOF2     | 84164  | ASCC2      | S |
| 23030 | JMJD2B   | 84246  | TRG20      | S |
| 23031 | MAST3    | 85445  | CNTNAP4    | L |
| 23032 | USP33    | 54606  | DDX56      | S |
| 23054 | NCOA6    | 63925  | ZNF335     | L |
| 23059 | CLUAP1   | 51550  | CINP       | R |
| 23062 | GGA2     | 23621  | BACE1      | L |
| 23062 | GGA2     | 51324  | SPG21      | R |
| 23062 | GGA2     | 54812  | AFTIPHILIN | L |
| 23063 | KIAA0261 | 54464  | XRN1       | L |
| 23085 | RAB6IP2  | 51560  | RAB6B      | L |
| 23089 | PEG10    | 57473  | GM632      | L |
| 23095 | KIF1B    | 90627  | STARD13    | L |
| 23099 | ZNF297B  | 51224  | TCEB3B     | R |

|       |          |        |               |   |
|-------|----------|--------|---------------|---|
| 23099 | ZNF297B  | 55388  | MCM10         | R |
| 23099 | ZNF297B  | 55885  | LMO3          | R |
| 23099 | ZNF297B  | 84708  | LNK           | R |
| 23099 | ZNF297B  | 147687 | ZNF417        | R |
| 23111 | SPG20    | 64750  | SMURF2        | L |
| 23136 | EPB41L3  | 23705  | IGSF4         | L |
| 23136 | EPB41L3  | 26047  | CNTNAP2       | L |
| 23136 | EPB41L3  | 51562  | MBIP          | R |
| 23136 | EPB41L3  | 84966  | IGSF21        | S |
| 23139 | MAST2    | 27148  | STK36         | L |
| 23141 | KIAA0692 | 57473  | GM632         | L |
| 23145 | KIAA0543 | 23331  | KIAA1043      | L |
| 23145 | KIAA0543 | 57485  | ATXN7L1       | L |
| 23154 | NCDN     | 54910  | SEMA4C        | L |
| 23162 | MAPK8IP3 | 60626  | RIC8A         | S |
| 23163 | GGA3     | 26994  | RNF11         | L |
| 23163 | GGA3     | 54812  | AFTIPHILIN    | L |
| 23172 | KIAA0157 | 64750  | SMURF2        | L |
| 23192 | ATG4B    | 79686  | C14orf139     | S |
| 23192 | ATG4B    | 81631  | MAP1LC3B      | S |
| 23199 | KIAA0182 | 55758  | RCOR3         | R |
| 23199 | KIAA0182 | 79873  | NUDT18        | R |
| 23199 | KIAA0182 | 84060  | DKFZP564O0523 | S |
| 23199 | KIAA0182 | 118460 | EXOSC6        | L |
| 23204 | ARL6IP   | 51763  | SKIP          | R |
| 23204 | ARL6IP   | 55294  | FBXW7         | S |
| 23204 | ARL6IP   | 84100  | ARL6          | L |
| 23207 | PLEKHM2  | 27173  | SLC39A1       | S |
| 23209 | MLC1     | 23604  | DAPK2         | L |
| 23214 | XPO6     | 23636  | NUP62         | R |
| 23225 | NUP210   | 56915  | EXOSC5        | L |
| 23228 | PLCL2    | 57453  | DSCAML1       | L |
| 23236 | PLCB1    | 54822  | TRPM7         | L |
| 23243 | ANKRD28  | 57473  | GM632         | L |
| 23256 | SCFD1    | 23326  | USP22         | S |
| 23265 | EXOC7    | 27339  | PRPF19        | R |
| 23265 | EXOC7    | 64400  | FTS           | S |
| 23265 | EXOC7    | 79036  | MGC2749       | R |
| 23265 | EXOC7    | 79882  | FLJ11806      | R |
| 23265 | EXOC7    | 83878  | USHBP1        | R |
| 23265 | EXOC7    | 84816  | RTN4IP1       | R |
| 23265 | EXOC7    | 90410  | IFT20         | R |
| 23268 | DNMBP    | 26999  | CYFIP2        | L |
| 23268 | DNMBP    | 51466  | EVL           | L |
| 23281 | KIAA0774 | 26150  | RIBC2         | R |
| 23281 | KIAA0774 | 55734  | ZFP64         | R |
| 23281 | KIAA0774 | 79027  | ZNF655        | R |
| 23281 | KIAA0774 | 127703 | FLJ38984      | R |
| 23283 | CSTF2T   | 29979  | UBQLN1        | R |
| 23286 | KIBRA    | 55791  | C1orf103      | S |
| 23286 | KIBRA    | 79577  | CDC73         | S |
| 23286 | KIBRA    | 203259 | C9orf25       | S |
| 23299 | BICD2    | 91754  | NEK9          | L |
| 23301 | EHBP1    | 30846  | EHD2          | L |
| 23308 | ICOSLG   | 29851  | ICOS          | L |
| 23309 | SIN3B    | 64375  | ZNFN1A4       | L |
| 23321 | TRIM2    | 140885 | PTPNS1        | R |
| 23326 | USP22    | 124995 | MRPL10        | S |
| 23327 | NEDD4L   | 26994  | RNF11         | L |
| 23345 | SYNE1    | 27185  | DISC1         | L |
| 23352 | RBAF600  | 55660  | FNBP3         | L |
| 23360 | FNBP4    | 55660  | FNBP3         | L |
| 23385 | NCSTN    | 23621  | BACE1         | L |
| 23385 | NCSTN    | 51107  | APH1A         | L |
| 23385 | NCSTN    | 55851  | PSENNEN       | L |
| 23385 | NCSTN    | 83464  | APH1B         | L |
| 23396 | PIP5K1C  | 83660  | TLN2          | L |



|       |           |        |                 |   |
|-------|-----------|--------|-----------------|---|
| 23396 | PIP5K1C   | 307255 | (null)          | S |
| 23404 | EXOSC2    | 54512  | EXOSC4          | L |
| 23404 | EXOSC2    | 79797  | ZNF408          | L |
| 23405 | DICER1    | 26523  | EIF2C1          | L |
| 23405 | DICER1    | 27161  | EIF2C2          | L |
| 23405 | DICER1    | 55124  | PIWIL2          | L |
| 23411 | SIRT1     | 23493  | HEY2            | L |
| 23412 | COMMD3    | 26152  | ZNF337          | S |
| 23413 | FREQ      | 113878 | DTX2            | R |
| 23420 | NOMO1     | 56926  | NCLN            | L |
| 23421 | ITGB3BP   | 23647  | ARFIP2          | R |
| 23421 | ITGB3BP   | 57062  | DDX24           | S |
| 23426 | GRIP1     | 25865  | PRKD2           | L |
| 23433 | RHOQ      | 23580  | CDC42EP4        | L |
| 23433 | RHOQ      | 50855  | PARD6A          | L |
| 23433 | RHOQ      | 57120  | GOPC            | L |
| 23433 | RHOQ      | 81704  | DOCK8           | L |
| 23435 | TARDBP    | 55968  | NSFL1C          | S |
| 23450 | SF3B3     | 79159  | MGC3731         | S |
| 23451 | SF3B1     | 51639  | SF3B14          | L |
| 23462 | HEY1      | 25865  | PRKD2           | L |
| 23468 | CBX5      | 51224  | TCEB3B          | R |
| 23468 | CBX5      | 78994  | MGC3121         | R |
| 23474 | ETHE1     | 51606  | ATP6V1H         | S |
| 23474 | ETHE1     | 55791  | C1orf103        | S |
| 23474 | ETHE1     | 84966  | IGSF21          | S |
| 23475 | QPRT      | 51684  | SUFU            | R |
| 23475 | QPRT      | 83755  | KRTAP4-12       | R |
| 23476 | BRD4      | 55660  | FNBP3           | L |
| 23476 | BRD4      | 55743  | CHFR            | S |
| 23476 | BRD4      | 79020  | C7orf25         | S |
| 23478 | SEC11L1   | 54978  | C2orf18         | S |
| 23493 | HEY2      | 25942  | SIN3A           | L |
| 23495 | TNFRSF13B | 407977 | TNFSF12-TNFSF13 | L |
| 23499 | MACF1     | 55729  | ATF7IP          | L |
| 23499 | MACF1     | 79613  | FLJ12688        | L |
| 23506 | KIAA0240  | 57685  | CACHD1          | L |
| 23517 | SKIV2L2   | 26019  | UPF2            | L |
| 23517 | SKIV2L2   | 54464  | XRN1            | L |
| 23517 | SKIV2L2   | 118460 | EXOSC6          | L |
| 23521 | RPL13A    | 51280  | GOLPH2          | S |
| 23521 | RPL13A    | 84893  | FBXO18          | S |
| 23523 | CABIN1    | 25942  | SIN3A           | L |
| 23534 | TNPO3     | 64750  | SMURF2          | L |
| 23542 | MAPK8IP2  | 80824  | DUSP16          | L |
| 23543 | RBM9      | 63948  | DMRTB1          | R |
| 23543 | RBM9      | 84528  | PEPP-2          | R |
| 23549 | DNPEP     | 54507  | TSRC1           | R |
| 23558 | WBP2      | 55964  | SEPT3           | S |
| 23569 | PADI4     | 121504 | HIST4H4         | L |
| 23578 | (null)    | 59349  | KLHL12          | R |
| 23578 | (null)    | 79173  | MGC11271        | R |
| 23578 | (null)    | 85365  | ALG2            | L |
| 23582 | CCNDBP1   | 55713  | ZNF334          | R |
| 23582 | CCNDBP1   | 64965  | MRPS9           | S |
| 23585 | TMEM50A   | 55262  | FLJ10925        | S |
| 23588 | KLHDC2    | 29888  | STRN4           | S |
| 23594 | ORC6L     | 23595  | ORC3L           | L |
| 23595 | ORC3L     | 55388  | MCM10           | L |
| 23598 | ZNF278    | 83990  | BRIP1           | L |
| 23613 | PRKCBP1   | 29109  | FHOD1           | L |
| 23617 | TSSK2     | 60385  | TSKS            | L |
| 23635 | SSBP2     | 26525  | IL1F5           | R |
| 23636 | NUP62     | 26003  | GORASP2         | R |
| 23636 | NUP62     | 51019  | CGI-116         | R |
| 23636 | NUP62     | 53371  | NUP54           | R |
| 23636 | NUP62     | 55145  | THAP1           | R |

|       |          |        |           |   |
|-------|----------|--------|-----------|---|
| 23640 | HSPBP1   | 55791  | C1orf103  | S |
| 23641 | LDOC1    | 26574  | AATF      | R |
| 23641 | LDOC1    | 27343  | POLL      | R |
| 23641 | LDOC1    | 54540  | FLJ10404  | R |
| 23641 | LDOC1    | 54552  | GNL3L     | R |
| 23641 | LDOC1    | 54906  | C10orf18  | R |
| 23641 | LDOC1    | 55211  | DPPA4     | R |
| 23641 | LDOC1    | 56242  | ZNF253    | L |
| 23641 | LDOC1    | 58500  | ZNF250    | R |
| 23641 | LDOC1    | 64376  | ZNFN1A5   | R |
| 23641 | LDOC1    | 79797  | ZNF408    | R |
| 23641 | LDOC1    | 84708  | LNX       | R |
| 23641 | LDOC1    | 121536 | AEBP2     | R |
| 23644 | RCD-8    | 167227 | DCP2      | L |
| 23645 | PPP1R15A | 57473  | GM632     | L |
| 23647 | ARFIP2   | 84062  | DTNBP1    | R |
| 23649 | POLA2    | 51236  | C8orf30A  | S |
| 23649 | POLA2    | 55147  | RBM23     | S |
| 23649 | POLA2    | 57062  | DDX24     | S |
| 23649 | POLA2    | 64400  | FTS       | S |
| 23649 | POLA2    | 78987  | CRELD1    | S |
| 23649 | POLA2    | 83931  | STK40     | S |
| 23649 | POLA2    | 84164  | ASCC2     | S |
| 23649 | POLA2    | 84950  | PRPF38A   | S |
| 23649 | POLA2    | 92797  | HELB      | L |
| 23649 | POLA2    | 167227 | DCP2      | L |
| 23649 | POLA2    | 203259 | C9orf25   | S |
| 23650 | TRIM29   | 79571  | GCC1      | R |
| 23650 | TRIM29   | 80022  | MYO15B    | R |
| 23650 | TRIM29   | 80321  | Cep70     | R |
| 23650 | TRIM29   | 80705  | TSGA10    | R |
| 23650 | TRIM29   | 84445  | LZTS2     | R |
| 23650 | TRIM29   | 84766  | MGC4266   | R |
| 23650 | TRIM29   | 85302  | FBF1      | R |
| 23658 | LSM5     | 25804  | LSM4      | L |
| 23658 | LSM5     | 27257  | LSM1      | L |
| 23658 | LSM5     | 27258  | LSM3      | L |
| 23658 | LSM5     | 51690  | LSM7      | L |
| 23658 | LSM5     | 51691  | LSM8      | L |
| 23658 | LSM5     | 56915  | EXOSC5    | L |
| 23658 | LSM5     | 57819  | LSM2      | L |
| 23673 | STX12    | 27065  | D4S234E   | L |
| 23705 | IGSF4    | 55729  | ATF7IP    | L |
| 23708 | GSPT2    | 26986  | PABPC1    | L |
| 23746 | AIPL1    | 51667  | NYREN18   | L |
| 23761 | PISD     | 54505  | DHX29     | S |
| 23761 | PISD     | 221955 | LOC221955 | S |
| 23774 | BRD1     | 57473  | GM632     | L |
| 23774 | BRD1     | 57562  | KIAA1377  | S |
| 24138 | IFIT5    | 51669  | TMEM66    | S |
| 24142 | NAT6     | 375078 | (null)    | S |
| 25782 | RAB3GAP2 | 118460 | EXOSC6    | L |
| 25788 | RAD54B   | 26003  | GORASP2   | R |
| 25788 | RAD54B   | 26150  | RIBC2     | R |
| 25788 | RAD54B   | 51157  | ZNF580    | R |
| 25788 | RAD54B   | 79090  | TRAPPC6A  | R |
| 25788 | RAD54B   | 80022  | MYO15B    | R |
| 25788 | RAD54B   | 80125  | FLJ32855  | R |
| 25788 | RAD54B   | 84708  | LNX       | R |
| 25788 | RAD54B   | 170082 | MGC17403  | R |
| 25804 | LSM4     | 27257  | LSM1      | L |
| 25804 | LSM4     | 27258  | LSM3      | L |
| 25804 | LSM4     | 51690  | LSM7      | L |
| 25804 | LSM4     | 51691  | LSM8      | L |
| 25804 | LSM4     | 54464  | XRN1      | L |
| 25804 | LSM4     | 54477  | PLEKHA5   | L |
| 25804 | LSM4     | 57819  | LSM2      | L |

|       |               |        |           |    |
|-------|---------------|--------|-----------|----|
| 25804 | LSM4          | 84528  | PEPP-2    | L  |
| 25804 | LSM4          | 201895 | LOC201895 | L  |
| 25816 | TNFAIP8       | 29079  | MED4      | R  |
| 25824 | PRDX5         | 60492  | MDS025    | S  |
| 25839 | COG4          | 91949  | COG7      | L  |
| 25842 | ASF1A         | 51160  | VPS28     | S  |
| 25843 | PREI3         | 51003  | MED31     | S  |
| 25843 | PREI3         | 51078  | THAP4     | S  |
| 25843 | PREI3         | 55791  | C1orf103  | S  |
| 25843 | PREI3         | 57498  | KIDINS220 | S  |
| 25843 | PREI3         | 84246  | TRG20     | S  |
| 25843 | PREI3         | 112398 | EGLN2     | S  |
| 25844 | YIPF3         | 84272  | YIPF4     | R  |
| 25855 | BRMS1         | 55791  | C1orf103  | S  |
| 25865 | PRKD2         | 64689  | GORASP1   | L  |
| 25870 | SUMF2         | 55294  | FBXW7     | S  |
| 25876 | C20orf28      | 79666  | PLEKHF2   | R  |
| 25888 | ZNF473        | 90933  | TRIM41    | R  |
| 25888 | ZNF473        | 134353 | LSM11     | L  |
| 25890 | ABI3BP        | 51225  | ABI3      | L  |
| 25897 | RNF19         | 27175  | TUBG2     | L  |
| 25897 | RNF19         | 51684  | SUFU      | L  |
| 25900 | HOM-TES-103   | 138065 | RNF183    | R  |
| 25913 | POT1          | 65057  | ACD       | RL |
| 25915 | DKFZP564J0123 | 27257  | LSM1      | L  |
| 25917 | THUMPD3       | 51691  | LSM8      | L  |
| 25930 | PTPN23        | 57062  | DDX24     | S  |
| 25934 | NIPSNAP3A     | 51280  | GOLPH2    | S  |
| 25942 | SIN3A         | 51564  | HDAC7A    | L  |
| 25942 | SIN3A         | 51742  | ARID4B    | L  |
| 25942 | SIN3A         | 64375  | ZNFN1A4   | L  |
| 25945 | PVRL3         | 56288  | PARD3     | L  |
| 25979 | DKFZp566O084  | 219541 | MED19     | S  |
| 25980 | C20orf4       | 55837  | C14orf11  | R  |
| 26003 | GORASP2       | 81628  | TSC22D4   | R  |
| 26017 | FAM32A        | 55968  | NSFL1C    | S  |
| 26019 | UPF2          | 27257  | LSM1      | L  |
| 26019 | UPF2          | 28987  | NOB1P     | L  |
| 26019 | UPF2          | 51013  | EXOSC1    | L  |
| 26019 | UPF2          | 54464  | XRN1      | L  |
| 26019 | UPF2          | 55802  | DCP1A     | L  |
| 26019 | UPF2          | 65109  | UPF3B     | L  |
| 26019 | UPF2          | 65110  | UPF3A     | L  |
| 26019 | UPF2          | 79797  | ZNF408    | L  |
| 26019 | UPF2          | 81631  | MAP1LC3B  | L  |
| 26019 | UPF2          | 118460 | EXOSC6    | L  |
| 26019 | UPF2          | 167227 | DCP2      | L  |
| 26019 | UPF2          | 196513 | DCP1B     | L  |
| 26036 | ZNF451        | 55660  | FNBP3     | L  |
| 26036 | ZNF451        | 79753  | SNIP1     | L  |
| 26039 | SS18L1        | 222546 | RFXDC1    | R  |
| 26059 | CAST1         | 28964  | GIT1      | L  |
| 26060 | APPL          | 55198  | DIP13B    | R  |
| 26061 | HPCL2         | 116225 | ZMYND19   | R  |
| 26071 | DKFZP564B147  | 29979  | UBQLN1    | R  |
| 26073 | POLDIP2       | 84164  | ASCC2     | S  |
| 26086 | GPSM1         | 83878  | USHBP1    | R  |
| 26086 | GPSM1         | 339965 | FLJ25770  | R  |
| 26088 | GGA1          | 26994  | RNF11     | L  |
| 26100 | WIPI-2        | 29888  | STRN4     | S  |
| 26128 | KIAA1279      | 27332  | ZNF638    | R  |
| 26128 | KIAA1279      | 55264  | C21orf77  | R  |
| 26128 | KIAA1279      | 79156  | PLEKHF1   | R  |
| 26128 | KIAA1279      | 79959  | C18orf9   | R  |
| 26128 | KIAA1279      | 93474  | ZNF670    | R  |
| 26136 | TES           | 55740  | ENAH      | L  |
| 26146 | TRAF3IP1      | 27185  | DISC1     | L  |

|       |         |        |           |   |
|-------|---------|--------|-----------|---|
| 26150 | RIBC2   | 29911  | HOOK2     | R |
| 26150 | RIBC2   | 29959  | NRBP      | R |
| 26150 | RIBC2   | 30008  | EFEMP2    | R |
| 26150 | RIBC2   | 51669  | TMEM66    | S |
| 26150 | RIBC2   | 56159  | TEX11     | R |
| 26150 | RIBC2   | 57596  | KIAA1446  | R |
| 26150 | RIBC2   | 64219  | PJA1      | S |
| 26150 | RIBC2   | 83878  | USHBP1    | R |
| 26150 | RIBC2   | 84705  | GTPBP3    | R |
| 26151 | NAT9    | 51631  | LUC7L2    | S |
| 26151 | NAT9    | 57562  | KIAA1377  | S |
| 26152 | ZNF337  | 374923 | (null)    | S |
| 26155 | NOC2L   | 55791  | C1orf103  | R |
| 26160 | SLB     | 89884  | LHX4      | L |
| 26168 | SENP3   | 55729  | ATF7IP    | L |
| 26207 | PITPNC1 | 57085  | AGTRAP    | R |
| 26254 | OPTC    | 55644  | OSGEP     | L |
| 26258 | PLDN    | 51019  | CGI-116   | R |
| 26258 | PLDN    | 55093  | C8orf32   | R |
| 26258 | PLDN    | 55109  | AGGF1     | R |
| 26258 | PLDN    | 79666  | PLEKHF2   | R |
| 26258 | PLDN    | 149371 | EXOC8     | R |
| 26258 | PLDN    | 220134 | C18orf24  | R |
| 26258 | PLDN    | 541468 | C1orf190  | R |
| 26271 | FBXO5   | 51343  | FZR1      | L |
| 26276 | VPS33B  | 63894  | C14orf133 | R |
| 26277 | TINF2   | 65057  | ACD       | L |
| 26289 | AK5     | 29888  | STRN4     | S |
| 26289 | AK5     | 55905  | ZNF313    | S |
| 26289 | AK5     | 64710  | NUCKS1    | S |
| 26289 | AK5     | 79034  | C7orf26   | S |
| 26289 | AK5     | 80128  | TRIM46    | S |
| 26292 | MYCBP   | 55701  | FLJ10357  | S |
| 26292 | MYCBP   | 57540  | PTCHD2    | S |
| 26292 | MYCBP   | 84073  | MYCBPAP   | L |
| 26292 | MYCBP   | 89876  | C3orf15   | L |
| 26292 | MYCBP   | 131034 | CPNE4     | L |
| 26292 | MYCBP   | 221184 | CPNE2     | L |
| 26297 | DELGEF  | 55770  | SEC5L1    | L |
| 26353 | HSPB8   | 27129  | HSPB7     | R |
| 26354 | GNL3    | 84164  | ASCC2     | S |
| 26505 | CNNM3   | 83755  | KRTAP4-12 | R |
| 26508 | HEYL    | 55729  | ATF7IP    | L |
| 26508 | HEYL    | 57473  | GM632     | L |
| 26511 | CHIC2   | 79666  | PLEKHF2   | R |
| 26511 | CHIC2   | 83755  | KRTAP4-12 | R |
| 26511 | CHIC2   | 117144 | CATSPER1  | R |
| 26519 | TIMM10  | 26520  | TIMM9     | L |
| 26525 | IL1F5   | 57473  | GM632     | L |
| 26525 | IL1F5   | 170463 | SSBP4     | R |
| 26575 | RGS17   | 28962  | OSTM1     | L |
| 26580 | BSCL2   | 55266  | TMEM19    | R |
| 26580 | BSCL2   | 55850  | MDS032    | R |
| 26580 | BSCL2   | 85027  | NID67     | R |
| 26610 | ELP4    | 55140  | ELP3      | L |
| 26749 | GAGE8   | 64396  | GMCL1L    | R |
| 26762 | HAVCR1  | 64218  | SEMA4A    | L |
| 26960 | NBEA    | 29888  | STRN4     | S |
| 26986 | PABPC1  | 51247  | PAIP2     | L |
| 26986 | PABPC1  | 51433  | ANAPC5    | L |
| 26994 | RNF11   | 27342  | RABGEF1   | L |
| 26994 | RNF11   | 29924  | EPN1      | L |
| 26994 | RNF11   | 29978  | UBQLN2    | L |
| 26994 | RNF11   | 51619  | UBE2D4    | L |
| 26994 | RNF11   | 54165  | DCUN1D1   | L |
| 26994 | RNF11   | 54476  | TRIAD3    | L |
| 26994 | RNF11   | 55040  | EPN3      | L |

|       |         |        |              |     |
|-------|---------|--------|--------------|-----|
| 26994 | RNF11   | 56893  | UBQLN4       | L   |
| 26994 | RNF11   | 57154  | SMURF1       | L   |
| 26994 | RNF11   | 64750  | SMURF2       | L   |
| 26994 | RNF11   | 83932  | C1orf124     | L   |
| 26994 | RNF11   | 84164  | ASCC2        | L   |
| 26994 | RNF11   | 133957 | LOC133957    | L   |
| 26994 | RNF11   | 146691 | TOM1L2       | L   |
| 26994 | RNF11   | 165918 | RNF168       | L   |
| 27033 | ZBTB32  | 84528  | PEPP-2       | R   |
| 27043 | PELP1   | 222019 | (null)       | S   |
| 27063 | ANKRD1  | 84665  | MYPN         | L   |
| 27067 | STAU2   | 57562  | KIAA1377     | S   |
| 27072 | VPS41   | 57473  | GM632        | L   |
| 27089 | QP-C    | 81488  | GRINL1A      | S   |
| 27095 | TRAPPC3 | 51693  | HSPC176      | R   |
| 27095 | TRAPPC3 | 79090  | TRAPPC6A     | R   |
| 27111 | SDCBP2  | 51538  | PS1D         | R   |
| 27111 | SDCBP2  | 54458  | DKFZp564J157 | R   |
| 27111 | SDCBP2  | 79169  | C1orf35      | R   |
| 27111 | SDCBP2  | 92610  | TIFA         | R   |
| 27111 | SDCBP2  | 151871 | DPPA2        | R   |
| 27111 | SDCBP2  | 222389 | C10orf30     | R   |
| 27122 | DKK3    | 162952 | (null)       | S   |
| 27127 | SMC1L2  | 50511  | SYCP3        | L   |
| 27130 | INVS    | 55662  | HIF1AN       | R   |
| 27130 | INVS    | 57473  | GM632        | L   |
| 27148 | STK36   | 51684  | SUFU         | L   |
| 27148 | STK36   | 55755  | CDK5RAP2     | L   |
| 27158 | NDOR1   | 54205  | CYCS         | L   |
| 27165 | GLS2    | 30851  | TAX1BP3      | L   |
| 27185 | DISC1   | 57731  | SPTBN4       | L   |
| 27185 | DISC1   | 81565  | NDEL1        | L   |
| 27190 | IL17B   | 55540  | IL17RB       | L   |
| 27229 | 76P     | 57144  | PAK7         | R   |
| 27229 | 76P     | 58490  | C20orf77     | R   |
| 27229 | 76P     | 79734  | KCTD17       | R   |
| 27229 | 76P     | 79991  | OBFC1        | R   |
| 27229 | 76P     | 83878  | USHBP1       | R   |
| 27229 | 76P     | 85302  | FBF1         | R   |
| 27229 | 76P     | 113675 | SDSL         | R   |
| 27229 | 76P     | 220082 | NURIT        | R   |
| 27232 | GNMT    | 60491  | NIF3L1       | R   |
| 27232 | GNMT    | 79666  | PLEKHF2      | R   |
| 27232 | GNMT    | 79873  | NUDT18       | R   |
| 27247 | HIRIP5  | 84273  | C4orf14      | S   |
| 27252 | KLHL20  | 51631  | LUC7L2       | S   |
| 27252 | KLHL20  | 55791  | C1orf103     | S   |
| 27252 | KLHL20  | 57562  | KIAA1377     | S   |
| 27257 | LSM1    | 27258  | LSM3         | L   |
| 27257 | LSM1    | 51690  | LSM7         | L   |
| 27257 | LSM1    | 54867  | FLJ20254     | L   |
| 27257 | LSM1    | 55823  | VPS11        | L   |
| 27257 | LSM1    | 57819  | LSM2         | L   |
| 27257 | LSM1    | 79602  | ADIPOR2      | L   |
| 27257 | LSM1    | 84908  | FLJ14668     | L   |
| 27257 | LSM1    | 118460 | EXOSC6       | L   |
| 27258 | LSM3    | 51690  | LSM7         | L   |
| 27258 | LSM3    | 51691  | LSM8         | L   |
| 27258 | LSM3    | 57819  | LSM2         | RSL |
| 27258 | LSM3    | 84967  | LSM10        | RL  |
| 27258 | LSM3    | 90799  | LOC90799     | L   |
| 27301 | APEX2   | 29911  | HOOK2        | R   |
| 27301 | APEX2   | 30008  | EFEMP2       | R   |
| 27304 | MOCS3   | 118460 | EXOSC6       | L   |
| 27309 | ZNF330  | 79797  | ZNF408       | L   |
| 27316 | RBMX    | 80125  | FLJ32855     | R   |
| 27316 | RBMX    | 83640  | MGC2560      | R   |

|       |          |        |               |   |
|-------|----------|--------|---------------|---|
| 27316 | RBMX     | 84708  | LNK           | R |
| 27316 | RBMX     | 202559 | KHDRBS2       | R |
| 27332 | ZNF638   | 29911  | HOOK2         | R |
| 27332 | ZNF638   | 30008  | EFEMP2        | R |
| 27332 | ZNF638   | 83755  | KRTAP4-12     | R |
| 27335 | EIF3S12  | 51386  | EIF3S6IP      | R |
| 27336 | HTATSF1  | 57473  | GM632         | L |
| 27342 | RABGEF1  | 79036  | MGC2749       | R |
| 27429 | HTRA2    | 56616  | DIABLO        | L |
| 27429 | HTRA2    | 57448  | BIRC6         | L |
| 28620 | TRBV2    | 55791  | C1orf103      | S |
| 28620 | TRBV2    | 84966  | IGSF21        | S |
| 28952 | CCDC22   | 131034 | CPNE4         | L |
| 28955 | DEXI     | 51280  | GOLPH2        | S |
| 28964 | GIT1     | 29070  | HSPC065       | S |
| 28964 | GIT1     | 51593  | ARS2          | S |
| 28964 | GIT1     | 55339  | WDR33         | S |
| 28964 | GIT1     | 57062  | DDX24         | S |
| 28964 | GIT1     | 57761  | TRIB3         | S |
| 28964 | GIT1     | 65265  | C8orf33       | S |
| 28964 | GIT1     | 374923 | (null)        | S |
| 28965 | SLC27A6  | 51076  | CUTC          | S |
| 28965 | SLC27A6  | 80021  | TMEM62        | S |
| 28986 | MAGEH1   | 55755  | CDK5RAP2      | S |
| 28986 | MAGEH1   | 64112  | MOAP1         | R |
| 28986 | MAGEH1   | 266812 | NAP1L5        | S |
| 28988 | DBNL     | 63898  | SH2D4A        | R |
| 28996 | HIPK2    | 94241  | TP53INP1      | L |
| 29058 | C20orf30 | 252839 | TMEM9         | S |
| 29068 | BTBD15   | 64750  | SMURF2        | L |
| 29079 | MED4     | 55729  | ATF7IP        | L |
| 29082 | CHMP4A   | 51760  | SYT17         | R |
| 29085 | PHPT1    | 29947  | DNMT3L        | R |
| 29085 | PHPT1    | 84988  | PPP1R16A      | S |
| 29102 | RNASEN   | 57473  | GM632         | L |
| 29107 | NXT1     | 56000  | NXF3          | R |
| 29108 | PYCARD   | 58484  | CARD12        | L |
| 29108 | PYCARD   | 114548 | CIAS1         | L |
| 29117 | BRD7     | 55643  | BTBD2         | S |
| 29760 | BLNK     | 30011  | SH3KBP1       | L |
| 29763 | PACSIN3  | 29993  | PACSIN1       | L |
| 29789 | PTD004   | 84164  | ASCC2         | S |
| 29789 | PTD004   | 162952 | (null)        | S |
| 29888 | STRN4    | 51260  | CXorf26       | S |
| 29888 | STRN4    | 51295  | SITPEC        | S |
| 29888 | STRN4    | 79684  | FLJ23342      | S |
| 29888 | STRN4    | 79948  | PRG2          | S |
| 29888 | STRN4    | 92170  | GTPBP7        | S |
| 29890 | RBM15B   | 380423 | (null)        | S |
| 29903 | HSU79303 | 55791  | C1orf103      | S |
| 29903 | HSU79303 | 84060  | DKFZP564O0523 | S |
| 29907 | SNX15    | 51669  | TMEM66        | S |
| 29911 | HOOK2    | 55388  | MCM10         | R |
| 29911 | HOOK2    | 58500  | ZNF250        | R |
| 29911 | HOOK2    | 64400  | FTS           | R |
| 29911 | HOOK2    | 80125  | FLJ32855      | R |
| 29922 | NME7     | 84260  | MGC10854      | R |
| 29924 | EPN1     | 51003  | MED31         | S |
| 29924 | EPN1     | 57562  | KIAA1377      | S |
| 29925 | GMPPB    | 29926  | GMPPA         | R |
| 29941 | PKN3     | 79658  | ARHGAP10      | L |
| 29946 | SERTAD3  | 83878  | USHBP1        | R |
| 29947 | DNMT3L   | 51187  | C15orf15      | R |
| 29949 | IL19     | 53832  | IL20RA        | L |
| 29950 | SERTAD1  | 57542  | KLHDC5        | R |
| 29952 | DPP7     | 54464  | XRN1          | L |
| 29959 | NRBP     | 55791  | C1orf103      | S |

|       |         |        |           |   |
|-------|---------|--------|-----------|---|
| 29959 | NRBP    | 81628  | TSC22D4   | R |
| 29974 | ACF     | 30000  | TNPO2     | L |
| 29978 | UBQLN2  | 55660  | FNBP3     | L |
| 29979 | UBQLN1  | 30008  | EFEMP2    | R |
| 29979 | UBQLN1  | 55374  | PRO1580   | R |
| 29979 | UBQLN1  | 55660  | FNBP3     | L |
| 29979 | UBQLN1  | 57542  | KLHDC5    | R |
| 29979 | UBQLN1  | 60626  | RIC8A     | R |
| 29979 | UBQLN1  | 125170 | SMCR7     | R |
| 29990 | PILRB   | 64092  | SAMSN1    | L |
| 30008 | EFEMP2  | 54557  | SGTB      | R |
| 30008 | EFEMP2  | 55367  | LRDD      | R |
| 30008 | EFEMP2  | 57088  | PLSCR4    | R |
| 30008 | EFEMP2  | 79088  | ZNF426    | R |
| 30008 | EFEMP2  | 79843  | FLJ22746  | R |
| 30008 | EFEMP2  | 84528  | PEPP-2    | R |
| 30008 | EFEMP2  | 84894  | LRRN6A    | R |
| 30008 | EFEMP2  | 114822 | RHPN1     | R |
| 30008 | EFEMP2  | 117144 | CATSPER1  | R |
| 30061 | SLC40A1 | 51280  | GOLPH2    | S |
| 30818 | CSEN    | 57126  | CD177     | R |
| 50604 | IL20    | 53832  | IL20RA    | L |
| 50615 | IL21R   | 59067  | IL21      | L |
| 50616 | IL22    | 116379 | IL22RA2   | L |
| 50618 | ITSN2   | 51691  | LSM8      | L |
| 50618 | ITSN2   | 56647  | BCCIP     | S |
| 50618 | ITSN2   | 57556  | SEMA6A    | L |
| 50619 | DEF6    | 57596  | KIAA1446  | R |
| 50717 | WDR42A  | 84705  | GTPBP3    | R |
| 50855 | PARD6A  | 56288  | PARD3     | L |
| 51002 | CGI-121 | 112858 | TP53RK    | R |
| 51003 | MED31   | 51236  | C8orf30A  | S |
| 51003 | MED31   | 55147  | RBM23     | S |
| 51003 | MED31   | 64129  | TINAGL1   | S |
| 51003 | MED31   | 79756  | (null)    | S |
| 51003 | MED31   | 80228  | C7orf19   | S |
| 51003 | MED31   | 80304  | FLJ21945  | S |
| 51003 | MED31   | 84164  | ASCC2     | S |
| 51003 | MED31   | 84878  | ZNF499    | S |
| 51010 | EXOSC3  | 51654  | CDK5RAP1  | L |
| 51010 | EXOSC3  | 54512  | EXOSC4    | L |
| 51010 | EXOSC3  | 56915  | EXOSC5    | L |
| 51013 | EXOSC1  | 54464  | XRN1      | L |
| 51013 | EXOSC1  | 54512  | EXOSC4    | L |
| 51013 | EXOSC1  | 56915  | EXOSC5    | L |
| 51013 | EXOSC1  | 118460 | EXOSC6    | L |
| 51019 | CGI-116 | 57326  | PBXIP1    | R |
| 51053 | GMNN    | 81620  | CDT1      | L |
| 51064 | (null)  | 55081  | ESRRBL1   | S |
| 51073 | MRPL4   | 57062  | DDX24     | S |
| 51073 | MRPL4   | 83755  | KRTAP4-12 | R |
| 51074 | MMRP19  | 79873  | NUDT18    | R |
| 51074 | MMRP19  | 84313  | VPS25     | R |
| 51074 | MMRP19  | 84708  | LNX       | R |
| 51076 | CUTC    | 51324  | SPG21     | R |
| 51076 | CUTC    | 55191  | NADSYN1   | R |
| 51076 | CUTC    | 60491  | NIF3L1    | R |
| 51076 | CUTC    | 79873  | NUDT18    | R |
| 51076 | CUTC    | 84164  | ASCC2     | S |
| 51076 | CUTC    | 84708  | LNX       | R |
| 51079 | NDUFA13 | 54464  | XRN1      | L |
| 51079 | NDUFA13 | 118460 | EXOSC6    | L |
| 51107 | APH1A   | 55851  | PSENN     | L |
| 51124 | IER3IP1 | 284615 | ANKRD34   | S |
| 51127 | TRIM17  | 56658  | TRIM39    | R |
| 51133 | KCTD3   | 51691  | LSM8      | L |
| 51138 | COPS4   | 51562  | MBIP      | R |

|       |          |        |           |   |
|-------|----------|--------|-----------|---|
| 51138 | COPS4    | 79173  | MGC11271  | R |
| 51138 | COPS4    | 83878  | USHBP1    | R |
| 51143 | DNCLI1   | 79902  | PCNT1     | L |
| 51150 | SDF4     | 57473  | GM632     | L |
| 51157 | ZNF580   | 81628  | TSC22D4   | R |
| 51171 | DHRS10   | 55093  | C8orf32   | R |
| 51171 | DHRS10   | 79873  | NUDT18    | R |
| 51176 | LEF1     | 51588  | PIAS4     | L |
| 51176 | LEF1     | 60529  | ALX4      | L |
| 51194 | IPO11    | 84812  | PLCD4     | R |
| 51199 | NIN      | 51637  | C14orf166 | L |
| 51205 | ACP6     | 54978  | C2orf18   | S |
| 51222 | ZNF219   | 51684  | SUFU      | L |
| 51224 | TCEB3B   | 54937  | FLJ20449  | R |
| 51224 | TCEB3B   | 79036  | MGC2749   | R |
| 51224 | TCEB3B   | 80321  | Cep70     | R |
| 51224 | TCEB3B   | 83755  | KRTAP4-12 | R |
| 51225 | ABI3     | 80817  | KIAA1712  | R |
| 51225 | ABI3     | 84062  | DTNBP1    | R |
| 51225 | ABI3     | 220766 | KIAA0470L | R |
| 51236 | C8orf30A | 54802  | TRIT1     | S |
| 51236 | C8orf30A | 55937  | APOM      | S |
| 51236 | C8orf30A | 254863 | MGC40107  | S |
| 51252 | LOC51252 | 90678  | LRSAM1    | S |
| 51260 | CXorf26  | 84988  | PPP1R16A  | S |
| 51268 | PIPOX    | 57489  | ODF2L     | S |
| 51280 | GOLPH2   | 60528  | ELAC2     | S |
| 51280 | GOLPH2   | 60685  | TEX27     | S |
| 51280 | GOLPH2   | 79369  | B3GNT4    | S |
| 51280 | GOLPH2   | 79760  | GEMIN7    | S |
| 51280 | GOLPH2   | 80023  | C20orf98  | S |
| 51280 | GOLPH2   | 268490 | (null)    | S |
| 51280 | GOLPH2   | 339448 | LOC339448 | S |
| 51282 | SCAND1   | 54925  | ZNF434    | R |
| 51282 | SCAND1   | 55888  | ZNF167    | R |
| 51319 | RSRC1    | 57180  | ACTR3B    | S |
| 51319 | RSRC1    | 57819  | LSM2      | S |
| 51324 | SPG21    | 55122  | C6orf166  | R |
| 51324 | SPG21    | 56474  | CTPS2     | R |
| 51324 | SPG21    | 57142  | RTN4      | R |
| 51324 | SPG21    | 66036  | MTMR9     | R |
| 51327 | ERAF     | 80149  | ZC3H12A   | R |
| 51327 | ERAF     | 81488  | GRINL1A   | S |
| 51329 | ARL6IP4  | 84100  | ARL6      | L |
| 51343 | FZR1     | 79020  | C7orf25   | S |
| 51361 | HOOK1    | 58500  | ZNF250    | R |
| 51364 | ZMYND10  | 81628  | TSC22D4   | R |
| 51375 | SNX7     | 56159  | TEX11     | R |
| 51388 | CGI-37   | 55035  | NOL8      | L |
| 51389 | RWDD1    | 79873  | NUDT18    | R |
| 51412 | ACTL6B   | 57017  | C16orf49  | S |
| 51421 | AMOTL2   | 54474  | KRT20     | R |
| 51421 | AMOTL2   | 55110  | FLJ10292  | R |
| 51421 | AMOTL2   | 79571  | GCC1      | R |
| 51426 | POLK     | 51455  | REV1L     | L |
| 51440 | HPCAL4   | 113878 | DTX2      | R |
| 51444 | RNF138   | 154313 | C6orf165  | R |
| 51466 | EVL      | 57556  | SEMA6A    | L |
| 51497 | TH1L     | 79885  | HDAC11    | S |
| 51497 | TH1L     | 84978  | FRMD5     | S |
| 51497 | TH1L     | 284131 | FLJ35220  | S |
| 51517 | NCKIPSD  | 63948  | DMRTB1    | R |
| 51534 | C6orf55  | 51562  | MBIP      | R |
| 51534 | C6orf55  | 54550  | EFCBP2    | R |
| 51534 | C6orf55  | 59349  | KLHL12    | R |
| 51534 | C6orf55  | 151871 | DPPA2     | R |
| 51534 | C6orf55  | 253980 | KCTD13    | R |



|       |          |        |           |   |
|-------|----------|--------|-----------|---|
| 51545 | ZNF581   | 83755  | KRTAP4-12 | R |
| 51545 | ZNF581   | 84445  | LZTS2     | R |
| 51562 | MBIP     | 55885  | LMO3      | R |
| 51562 | MBIP     | 57325  | CSRP2BP   | R |
| 51562 | MBIP     | 79666  | PLEKHF2   | R |
| 51562 | MBIP     | 80254  | Cep63     | R |
| 51562 | MBIP     | 81565  | NDEL1     | R |
| 51562 | MBIP     | 85359  | DGCR6L    | R |
| 51585 | PCF11    | 53981  | CPSF2     | L |
| 51588 | PIAS4    | 57473  | GM632     | L |
| 51588 | PIAS4    | 79753  | SNIP1     | L |
| 51593 | ARS2     | 222019 | (null)    | S |
| 51594 | NAG      | 93145  | OLFM2     | S |
| 51604 | PIGT     | 65110  | UPF3A     | S |
| 51608 | C7orf20  | 57562  | KIAA1377  | S |
| 51608 | C7orf20  | 90990  | KIFC2     | S |
| 51608 | C7orf20  | 254863 | MGC40107  | S |
| 51608 | C7orf20  | 337867 | PHGDHL1   | S |
| 51617 | HMP19    | 53407  | STX18     | S |
| 51617 | HMP19    | 54978  | C2orf18   | S |
| 51617 | HMP19    | 54985  | HCFC1R1   | S |
| 51619 | UBE2D4   | 55658  | RNF126    | R |
| 51619 | UBE2D4   | 56658  | TRIM39    | R |
| 51619 | UBE2D4   | 113878 | DTX2      | R |
| 51631 | LUC7L2   | 54819  | ZCCHC10   | S |
| 51631 | LUC7L2   | 55037  | FLJ20758  | S |
| 51631 | LUC7L2   | 55729  | ATF7IP    | L |
| 51631 | LUC7L2   | 55755  | CDK5RAP2  | S |
| 51631 | LUC7L2   | 56901  | LOC56901  | S |
| 51631 | LUC7L2   | 57562  | KIAA1377  | S |
| 51631 | LUC7L2   | 65990  | C16orf24  | S |
| 51631 | LUC7L2   | 79576  | NKAP      | S |
| 51631 | LUC7L2   | 79686  | C14orf139 | S |
| 51631 | LUC7L2   | 81631  | MAP1LC3B  | S |
| 51631 | LUC7L2   | 266812 | NAP1L5    | S |
| 51631 | LUC7L2   | 307255 | (null)    | S |
| 51654 | CDK5RAP1 | 56915  | EXOSC5    | L |
| 51659 | Pfs2     | 84296  | SLD5      | R |
| 51669 | TMEM66   | 230991 | (null)    | S |
| 51678 | MPP6     | 83658  | DNCL2A    | L |
| 51684 | SUFU     | 55663  | ZNF446    | R |
| 51684 | SUFU     | 55670  | PEX26     | R |
| 51684 | SUFU     | 57333  | RCN3      | R |
| 51684 | SUFU     | 58526  | MID1IP1   | R |
| 51684 | SUFU     | 92595  | MGC13138  | R |
| 51684 | SUFU     | 169792 | GLIS3     | R |
| 51690 | LSM7     | 51691  | LSM8      | L |
| 51690 | LSM7     | 57819  | LSM2      | L |
| 51690 | LSM7     | 118460 | EXOSC6    | L |
| 51691 | LSM8     | 55577  | NAGK      | L |
| 51691 | LSM8     | 55793  | FAM63A    | L |
| 51691 | LSM8     | 55802  | DCP1A     | L |
| 51691 | LSM8     | 57819  | LSM2      | L |
| 51691 | LSM8     | 79763  | ISOC2     | L |
| 51691 | LSM8     | 83706  | URP2      | L |
| 51691 | LSM8     | 91522  | COL23A1   | L |
| 51691 | LSM8     | 118460 | EXOSC6    | L |
| 51691 | LSM8     | 163702 | IL28RA    | L |
| 51699 | VPS29    | 118924 | C10orf4   | S |
| 51699 | VPS29    | 162952 | (null)    | S |
| 51706 | CYB5R1   | 54205  | CYCS      | L |
| 51720 | RAP80    | 83444  | ZNHIT4    | S |
| 51726 | DNAJB11  | 197131 | UBR1      | S |
| 51729 | WBP11    | 55322  | FLJ11193  | R |
| 51729 | WBP11    | 84816  | RTN4IP1   | R |
| 51751 | HIGD1B   | 81488  | GRINL1A   | S |
| 51755 | CRK7     | 55660  | FNBP3     | L |

|       |              |        |               |   |
|-------|--------------|--------|---------------|---|
| 51760 | SYT17        | 81628  | TSC22D4       | R |
| 51762 | RAB8B        | 117177 | RAB3IP        | L |
| 51776 | ZAK          | 163081 | ZNF567        | R |
| 51780 | JMJD1B       | 57473  | GM632         | L |
| 53615 | MBD3         | 54815  | GATAD2A       | L |
| 53826 | FXVD6        | 55142  | C15orf25      | S |
| 53826 | FXVD6        | 56927  | GPR108        | S |
| 53826 | FXVD6        | 60492  | MDS025        | S |
| 53826 | FXVD6        | 79939  | SLC35E1       | S |
| 53826 | FXVD6        | 84060  | DKFZP564O0523 | S |
| 53904 | MYO3A        | 81488  | GRINL1A       | S |
| 54033 | RBM11        | 84528  | PEPP-2        | R |
| 54107 | POLE3        | 54108  | CHRAC1        | L |
| 54165 | DCUN1D1      | 56658  | TRIM39        | R |
| 54458 | DKFZp564J157 | 57142  | RTN4          | S |
| 54458 | DKFZp564J157 | 59349  | KLHL12        | R |
| 54458 | DKFZp564J157 | 83755  | KRTAP4-12     | R |
| 54461 | FBXW5        | 83755  | KRTAP4-12     | R |
| 54464 | XRN1         | 55802  | DCP1A         | L |
| 54464 | XRN1         | 64847  | SPATA20       | L |
| 54464 | XRN1         | 65109  | UPF3B         | L |
| 54464 | XRN1         | 90113  | LOC90113      | L |
| 54464 | XRN1         | 118460 | EXOSC6        | L |
| 54464 | XRN1         | 196513 | DCP1B         | L |
| 54472 | TOLLIP       | 84528  | PEPP-2        | R |
| 54474 | KRT20        | 79095  | C9orf16       | R |
| 54474 | KRT20        | 79696  | C14orf140     | R |
| 54474 | KRT20        | 79882  | FLJ11806      | R |
| 54474 | KRT20        | 80347  | COASY         | R |
| 54474 | KRT20        | 84832  | MGC12538      | R |
| 54474 | KRT20        | 149371 | EXOC8         | R |
| 54505 | DHX29        | 79735  | TBC1D17       | S |
| 54505 | DHX29        | 80152  | FLJ13111      | S |
| 54507 | TSRC1        | 59277  | NTN4          | R |
| 54507 | TSRC1        | 65989  | EGFL9         | R |
| 54507 | TSRC1        | 83755  | KRTAP4-12     | R |
| 54507 | TSRC1        | 117144 | CATSPER1      | R |
| 54512 | EXOSC4       | 55144  | LRR8D         | L |
| 54512 | EXOSC4       | 55627  | FLJ20297      | L |
| 54512 | EXOSC4       | 81889  | FAHD1         | L |
| 54512 | EXOSC4       | 90480  | GADD45GIP1    | L |
| 54512 | EXOSC4       | 116461 | C1orf19       | L |
| 54541 | DDIT4        | 55791  | C1orf103      | S |
| 54544 | C1orf42      | 55791  | C1orf103      | S |
| 54544 | C1orf42      | 57562  | KIAA1377      | S |
| 54544 | C1orf42      | 84966  | IGSF21        | S |
| 54550 | EFCBP2       | 55093  | C8orf32       | R |
| 54550 | EFCBP2       | 55758  | RCOR3         | R |
| 54550 | EFCBP2       | 56159  | TEX11         | R |
| 54550 | EFCBP2       | 79050  | NOC4L         | R |
| 54550 | EFCBP2       | 79172  | MGC11266      | R |
| 54550 | EFCBP2       | 80125  | FLJ32855      | R |
| 54550 | EFCBP2       | 84708  | LNK           | R |
| 54550 | EFCBP2       | 85359  | DGCR6L        | R |
| 54550 | EFCBP2       | 85865  | LOC85865      | R |
| 54550 | EFCBP2       | 284058 | LOC284058     | R |
| 54596 | ECAT11       | 57473  | GM632         | L |
| 54606 | DDX56        | 79797  | ZNF408        | L |
| 54622 | ARFRP2       | 56850  | GRIPAP1       | S |
| 54622 | ARFRP2       | 60492  | MDS025        | S |
| 54622 | ARFRP2       | 65991  | FUNDC2        | S |
| 54622 | ARFRP2       | 197131 | UBR1          | S |
| 54778 | RNF111       | 64750  | SMURF2        | L |
| 54819 | ZCCHC10      | 55145  | THAP1         | R |
| 54819 | ZCCHC10      | 151871 | DPPA2         | R |
| 54819 | ZCCHC10      | 246329 | STAC3         | R |
| 54822 | TRPM7        | 140803 | TRPM6         | L |

|       |           |        |           |   |
|-------|-----------|--------|-----------|---|
| 54857 | GDPD2     | 118924 | C10orf4   | S |
| 54857 | GDPD2     | 284004 | FLJ23825  | S |
| 54870 | FLJ20259  | 55729  | ATF7IP    | L |
| 54880 | BCOR      | 131034 | CPNE4     | L |
| 54880 | BCOR      | 221184 | CPNE2     | L |
| 54882 | ANKHD1    | 81488  | GRINL1A   | S |
| 54902 | TTC19     | 65109  | UPF3B     | L |
| 54903 | FLJ20345  | 57062  | DDX24     | S |
| 54908 | FLJ20364  | 57562  | KIAA1377  | S |
| 54925 | ZNF434    | 55663  | ZNF446    | R |
| 54925 | ZNF434    | 55888  | ZNF167    | R |
| 54927 | CHCHD3    | 83755  | KRTAP4-12 | R |
| 54936 | ADPRHL2   | 118924 | C10orf4   | S |
| 54936 | ADPRHL2   | 162952 | (null)    | S |
| 54936 | ADPRHL2   | 284004 | FLJ23825  | S |
| 54949 | FLJ20487  | 60492  | MDS025    | S |
| 54951 | COMMD8    | 56901  | LOC56901  | S |
| 54974 | ICF45     | 55531  | ELMOD1    | R |
| 54976 | C20orf27  | 138046 | LOC138046 | R |
| 54977 | FLJ20551  | 79159  | MGC3731   | S |
| 54977 | FLJ20551  | 80345  | ZNF435    | S |
| 54978 | C2orf18   | 56901  | LOC56901  | S |
| 54978 | C2orf18   | 56984  | TNFSF5IP1 | S |
| 54978 | C2orf18   | 58475  | MS4A7     | S |
| 54997 | TSC       | 55297  | FLJ11088  | R |
| 55004 | FLJ20625  | 55324  | ABCF3     | S |
| 55004 | FLJ20625  | 60492  | MDS025    | S |
| 55011 | FLJ20643  | 81628  | TSC22D4   | R |
| 55017 | C14orf119 | 85444  | LRRCC1    | S |
| 55023 | PHIP      | 81551  | STMN4     | S |
| 55035 | NOL8      | 64121  | RRAGC     | L |
| 55041 | PLEKHB2   | 55729  | ATF7IP    | L |
| 55041 | PLEKHB2   | 380423 | (null)    | S |
| 55062 | WIPI49    | 79047  | KCTD15    | S |
| 55068 | FLJ10094  | 60491  | NIF3L1    | R |
| 55068 | FLJ10094  | 84708  | LNX       | R |
| 55093 | C8orf32   | 79077  | XTP3TPA   | R |
| 55116 | TMEM39B   | 162417 | NAGS      | S |
| 55122 | C6orf166  | 84708  | LNX       | R |
| 55139 | FLJ10415  | 80023  | C20orf98  | S |
| 55145 | THAP1     | 55342  | STRBP     | R |
| 55145 | THAP1     | 79169  | C1orf35   | R |
| 55145 | THAP1     | 79576  | NKAP      | R |
| 55145 | THAP1     | 79797  | ZNF408    | R |
| 55145 | THAP1     | 81488  | GRINL1A   | R |
| 55145 | THAP1     | 138046 | LOC138046 | R |
| 55147 | RBM23     | 57562  | KIAA1377  | S |
| 55160 | ARHGEF10L | 362598 | (null)    | S |
| 55191 | NADSYN1   | 80022  | MYO15B    | R |
| 55193 | PB1       | 57473  | GM632     | L |
| 55198 | DIP13B    | 57403  | RAB22A    | R |
| 55209 | FLJ10707  | 151871 | DPPA2     | R |
| 55211 | DPPA4     | 151871 | DPPA2     | R |
| 55227 | LRRC1     | 55914  | ERBB2IP   | L |
| 55227 | LRRC1     | 57562  | KIAA1377  | S |
| 55231 | FLJ10786  | 147872 | FLJ32658  | R |
| 55233 | MOBK1B    | 79036  | MGC2749   | R |
| 55252 | ASXL2     | 55660  | FNBP3     | L |
| 55269 | PSPC1     | 55791  | C1orf103  | S |
| 55274 | PHF10     | 83746  | L3MBTL2   | R |
| 55285 | FLJ11016  | 138046 | LOC138046 | R |
| 55294 | FBXW7     | 73121  | (null)    | S |
| 55294 | FBXW7     | 84894  | LRRN6A    | S |
| 55294 | FBXW7     | 253714 | C6orf167  | S |
| 55294 | FBXW7     | 257218 | SHPRH     | S |
| 55294 | FBXW7     | 340390 | KIAA1875  | S |
| 55308 | DDX19A    | 57409  | AD023     | R |

|       |          |        |               |   |
|-------|----------|--------|---------------|---|
| 55322 | FLJ11193 | 84337  | ELOF1         | R |
| 55324 | ABCF3    | 79939  | SLC35E1       | S |
| 55324 | ABCF3    | 84273  | C4orf14       | S |
| 55324 | ABCF3    | 114034 | TOE1          | S |
| 55339 | WDR33    | 84060  | DKFZP564O0523 | S |
| 55388 | MCM10    | 55722  | Cep72         | R |
| 55388 | MCM10    | 80321  | Cep70         | R |
| 55388 | MCM10    | 115106 | CCDC5         | L |
| 55388 | MCM10    | 127557 | ZBTB8         | R |
| 55388 | MCM10    | 151871 | DPPA2         | R |
| 55509 | SNFT     | 84699  | CREB3L3       | L |
| 55509 | SNFT     | 90993  | CREB3L1       | L |
| 55509 | SNFT     | 148327 | CREB3L4       | L |
| 55540 | IL17RB   | 64806  | IL17E         | L |
| 55565 | LOC55565 | 541468 | C1orf190      | R |
| 55577 | NAGK     | 84708  | LNX           | R |
| 55577 | NAGK     | 167227 | DCP2          | L |
| 55577 | NAGK     | 339965 | FLJ25770      | R |
| 55596 | ZCCHC8   | 55660  | FBNP3         | L |
| 55603 | FAM46A   | 56647  | BCCIP         | L |
| 55603 | FAM46A   | 112398 | EGLN2         | L |
| 55611 | OTUB1    | 79589  | RNF128        | L |
| 55613 | MTMR8    | 66036  | MTMR9         | R |
| 55619 | DOCK10   | 541468 | C1orf190      | R |
| 55643 | BTBD2    | 57473  | GM632         | L |
| 55643 | BTBD2    | 60492  | MDS025        | S |
| 55643 | BTBD2    | 84060  | DKFZP564O0523 | S |
| 55643 | BTBD2    | 84966  | IGSF21        | S |
| 55643 | BTBD2    | 197131 | UBR1          | S |
| 55660 | FBNP3    | 56893  | UBQLN4        | L |
| 55660 | FBNP3    | 57620  | STIM2         | L |
| 55660 | FBNP3    | 91010  | FMNL3         | L |
| 55660 | FBNP3    | 114793 | FMNL2         | L |
| 55660 | FBNP3    | 204851 | HIPK1         | L |
| 55660 | FBNP3    | 221935 | SDK1          | L |
| 55661 | DDX27    | 57473  | GM632         | L |
| 55661 | DDX27    | 84988  | PPP1R16A      | S |
| 55662 | HIF1AN   | 79754  | ASB13         | R |
| 55662 | HIF1AN   | 85302  | FBF1          | R |
| 55662 | HIF1AN   | 140462 | ASB9          | R |
| 55663 | ZNF446   | 80345  | ZNF435        | R |
| 55663 | ZNF446   | 84838  | ZNF496        | R |
| 55663 | ZNF446   | 85359  | DGCR6L        | R |
| 55684 | C9orf86  | 79173  | MGC11271      | R |
| 55692 | LUC7L    | 65990  | C16orf24      | S |
| 55698 | FLJ10324 | 84164  | ASCC2         | S |
| 55698 | FLJ10324 | 84528  | PEPP-2        | R |
| 55698 | FLJ10324 | 219541 | MED19         | S |
| 55698 | FLJ10324 | 380423 | (null)        | S |
| 55700 | RPRC1    | 84060  | DKFZP564O0523 | S |
| 55722 | Cep72    | 84708  | LNX           | R |
| 55722 | Cep72    | 147687 | ZNF417        | R |
| 55726 | C12orf11 | 79027  | ZNF655        | R |
| 55729 | ATF7IP   | 57724  | KIAA1632      | L |
| 55729 | ATF7IP   | 59348  | ZNF350        | L |
| 55729 | ATF7IP   | 60676  | PAPPA2        | L |
| 55729 | ATF7IP   | 63971  | KIF13A        | L |
| 55729 | ATF7IP   | 64420  | SUSD1         | L |
| 55729 | ATF7IP   | 79987  | SVEP1         | L |
| 55729 | ATF7IP   | 84245  | MGC3207       | L |
| 55734 | ZFP64    | 57596  | KIAA1446      | R |
| 55737 | VPS35    | 57473  | GM632         | L |
| 55746 | NUP133   | 57122  | NUP107        | L |
| 55755 | CDK5RAP2 | 57519  | STARD9        | S |
| 55755 | CDK5RAP2 | 59343  | SENP2         | S |
| 55755 | CDK5RAP2 | 84060  | DKFZP564O0523 | S |
| 55758 | RCOR3    | 80321  | Cep70         | R |

|       |          |        |               |    |
|-------|----------|--------|---------------|----|
| 55770 | SEC5L1   | 149371 | EXOC8         | L  |
| 55791 | C1orf103 | 56144  | PCDHA4        | S  |
| 55791 | C1orf103 | 57664  | PLEKHA4       | S  |
| 55791 | C1orf103 | 64968  | MRPS6         | S  |
| 55791 | C1orf103 | 79756  | (null)        | S  |
| 55791 | C1orf103 | 91653  | BOC           | S  |
| 55791 | C1orf103 | 170961 | ANKRD24       | S  |
| 55791 | C1orf103 | 284403 | WDR62         | S  |
| 55802 | DCP1A    | 167227 | DCP2          | L  |
| 55813 | C17orf40 | 79036  | MGC2749       | R  |
| 55813 | C17orf40 | 84528  | PEPP-2        | R  |
| 55855 | FAM45B   | 254863 | MGC40107      | S  |
| 55872 | PBK      | 57562  | KIAA1377      | S  |
| 55885 | LMO3     | 79036  | MGC2749       | R  |
| 55885 | LMO3     | 79800  | ALS2CR8       | R  |
| 55885 | LMO3     | 127557 | ZBTB8         | R  |
| 55885 | LMO3     | 138046 | LOC138046     | R  |
| 55885 | LMO3     | 220766 | KIAA0470L     | R  |
| 55885 | LMO3     | 222546 | RFXDC1        | R  |
| 55888 | ZNF167   | 170082 | MGC17403      | R  |
| 55906 | KIAA1166 | 79036  | MGC2749       | R  |
| 55916 | NXT2     | 56000  | NXF3          | RL |
| 55916 | NXT2     | 56001  | NXF2          | L  |
| 55957 | F25965   | 56159  | TEX11         | R  |
| 56144 | PCDHA4   | 60492  | MDS025        | S  |
| 56144 | PCDHA4   | 84060  | DKFZP564O0523 | S  |
| 56144 | PCDHA4   | 84966  | IGSF21        | S  |
| 56159 | TEX11    | 56243  | KIAA1217      | R  |
| 56159 | TEX11    | 57642  | COL20A1       | R  |
| 56159 | TEX11    | 81628  | TSC22D4       | R  |
| 56159 | TEX11    | 81888  | HYI           | R  |
| 56159 | TEX11    | 84260  | MGC10854      | R  |
| 56159 | TEX11    | 84330  | ZNF414        | R  |
| 56159 | TEX11    | 114327 | EFHC1         | R  |
| 56159 | TEX11    | 143379 | C10orf82      | R  |
| 56159 | TEX11    | 151254 | ALS2CR11      | R  |
| 56159 | TEX11    | 220136 | CCDC11        | R  |
| 56243 | KIAA1217 | 56915  | EXOSC5        | R  |
| 56243 | KIAA1217 | 79571  | GCC1          | R  |
| 56616 | DIABLO   | 57448  | BIRC6         | L  |
| 56652 | PEO1     | 64400  | FTS           | S  |
| 56652 | PEO1     | 222019 | (null)        | S  |
| 56654 | NPDC1    | 83755  | KRTAP4-12     | R  |
| 56658 | TRIM39   | 80019  | UBTD1         | R  |
| 56658 | TRIM39   | 84812  | PLCD4         | R  |
| 56674 | TMEM9B   | 57062  | DDX24         | S  |
| 56901 | LOC56901 | 79555  | (null)        | S  |
| 56901 | LOC56901 | 81890  | QTRT1         | S  |
| 56901 | LOC56901 | 197131 | UBR1          | S  |
| 56901 | LOC56901 | 222019 | (null)        | S  |
| 56904 | SH3GLB2  | 339965 | FLJ25770      | R  |
| 56906 | THAP10   | 83755  | KRTAP4-12     | R  |
| 56906 | THAP10   | 140735 | Dlc2          | R  |
| 56911 | C21orf7  | 257397 | TAB3          | R  |
| 56915 | EXOSC5   | 148156 | ZNF558        | L  |
| 56927 | GPR108   | 90678  | LRSAM1        | S  |
| 56949 | XAB2     | 57685  | CACHD1        | L  |
| 56952 | PRTFDC1  | 60491  | NIF3L1        | R  |
| 56952 | PRTFDC1  | 80308  | FLAD1         | R  |
| 56952 | PRTFDC1  | 196483 | FAM86A        | R  |
| 56963 | RGMA     | 84988  | PPP1R16A      | S  |
| 56992 | KIF15    | 57562  | KIAA1377      | S  |
| 56992 | KIF15    | 84557  | MAP1LC3A      | S  |
| 56998 | CTNNBIP1 | 79656  | C1orf165      | R  |
| 57002 | C7orf36  | 57562  | KIAA1377      | S  |
| 57017 | C16orf49 | 57719  | TMEM16H       | S  |
| 57062 | DDX24    | 374923 | (null)        | S  |

|       |           |        |               |   |
|-------|-----------|--------|---------------|---|
| 57088 | PLSCR4    | 83755  | KRTAP4-12     | R |
| 57095 | C1orf128  | 79577  | CDC73         | S |
| 57097 | PARP11    | 84705  | GTPBP3        | R |
| 57136 | C20orf3   | 84695  | LOXL3         | S |
| 57142 | RTN4      | 79666  | PLEKHF2       | R |
| 57144 | PAK7      | 84445  | LZTS2         | R |
| 57159 | TRIM54    | 84675  | TRIM55        | L |
| 57159 | TRIM54    | 84676  | TRIM63        | L |
| 57179 | KIAA1191  | 79159  | MGC3731       | S |
| 57192 | MCOLN1    | 79939  | SLC35E1       | S |
| 57326 | PBXIP1    | 151871 | DPPA2         | R |
| 57333 | RCN3      | 57542  | KLHDC5        | R |
| 57333 | RCN3      | 158471 | C9orf65       | R |
| 57333 | RCN3      | 283987 | C17orf28      | R |
| 57336 | ZNF287    | 80021  | TMEM62        | S |
| 57381 | RHOJ      | 81704  | DOCK8         | L |
| 57402 | S100A14   | 140576 | S100A16       | R |
| 57409 | AD023     | 118460 | EXOSC6        | L |
| 57418 | WDR18     | 84273  | C4orf14       | S |
| 57453 | DSCAML1   | 260425 | MAGI3         | L |
| 57473 | GM632     | 58487  | ZF            | L |
| 57473 | GM632     | 60676  | PAPPA2        | L |
| 57473 | GM632     | 64855  | C9orf88       | L |
| 57473 | GM632     | 80351  | TNKS2         | L |
| 57473 | GM632     | 84445  | LZTS2         | L |
| 57489 | ODF2L     | 57562  | KIAA1377      | S |
| 57498 | KIDINS220 | 79577  | CDC73         | S |
| 57542 | KLHDC5    | 83878  | USHBP1        | R |
| 57549 | IGSF9     | 84164  | ASCC2         | S |
| 57556 | SEMA6A    | 57630  | SH3MD2        | L |
| 57562 | KIAA1377  | 64400  | FTS           | S |
| 57562 | KIAA1377  | 64968  | MRPS6         | S |
| 57562 | KIAA1377  | 79137  | C2orf17       | S |
| 57562 | KIAA1377  | 79641  | FLJ22386      | S |
| 57562 | KIAA1377  | 81488  | GRINL1A       | S |
| 57562 | KIAA1377  | 266812 | NAP1L5        | S |
| 57591 | MKL1      | 93649  | MYOCD         | L |
| 57596 | KIAA1446  | 58500  | ZNF250        | R |
| 57596 | KIAA1446  | 84080  | C16orf48      | R |
| 57596 | KIAA1446  | 117144 | CATSPER1      | R |
| 57596 | KIAA1446  | 147687 | ZNF417        | R |
| 57596 | KIAA1446  | 283987 | C17orf28      | R |
| 57605 | PITPNM2   | 131034 | CPNE4         | L |
| 57610 | RANBP10   | 57685  | CACHD1        | L |
| 57610 | RANBP10   | 80731  | KIAA1679      | L |
| 57610 | RANBP10   | 84466  | MEGF10        | L |
| 57610 | RANBP10   | 85445  | CNTNAP4       | L |
| 57658 | CALCOCO1  | 79735  | TBC1D17       | S |
| 57670 | KIAA1549  | 79577  | CDC73         | S |
| 57761 | TRIB3     | 84060  | DKFZP564O0523 | S |
| 57787 | MARK4     | 79803  | HPS6          | S |
| 57799 | RAB40C    | 114034 | TOE1          | S |
| 57819 | LSM2      | 79797  | ZNF408        | L |
| 57862 | ZNF410    | 81488  | GRINL1A       | S |
| 58190 | CTDSP1    | 83461  | CDCA3         | R |
| 58477 | SRPRB     | 80279  | CDK5RAP3      | S |
| 58484 | CARD12    | 64127  | CARD15        | L |
| 58484 | CARD12    | 147945 | NALP4         | L |
| 58494 | JAM2      | 83700  | JAM3          | L |
| 58500 | ZNF250    | 80817  | KIAA1712      | R |
| 58500 | ZNF250    | 83755  | KRTAP4-12     | R |
| 58500 | ZNF250    | 127557 | ZBTB8         | R |
| 58500 | ZNF250    | 151871 | DPPA2         | R |
| 58513 | EPS15L1   | 85439  | STN2          | L |
| 58516 | FAM60A    | 84705  | GTPBP3        | R |
| 59349 | KLHL12    | 80306  | MED28         | R |
| 59349 | KLHL12    | 84708  | LNX           | R |

|       |          |        |               |   |
|-------|----------|--------|---------------|---|
| 59349 | KLHL12   | 124460 | SLIC1         | R |
| 59350 | LGR7     | 117579 | RLN3          | L |
| 60313 | GPBP1L1  | 79666  | PLEKHF2       | R |
| 60490 | PPCDC    | 80152  | FLJ13111      | S |
| 60491 | NIF3L1   | 63948  | DMRTB1        | R |
| 60491 | NIF3L1   | 79036  | MGC2749       | R |
| 60491 | NIF3L1   | 79077  | XTP3TPA       | R |
| 60491 | NIF3L1   | 79734  | KCTD17        | R |
| 60491 | NIF3L1   | 81628  | TSC22D4       | R |
| 60491 | NIF3L1   | 92610  | TIFA          | R |
| 60491 | NIF3L1   | 222389 | C10orf30      | R |
| 60528 | ELAC2    | 84164  | ASCC2         | S |
| 60626 | RIC8A    | 92285  | ZNF585B       | S |
| 60684 | FLJ12716 | 307255 | (null)        | S |
| 64109 | CRLF2    | 85480  | TSLP          | L |
| 64112 | MOAP1    | 151871 | DPPA2         | R |
| 64219 | PJA1     | 84164  | ASCC2         | S |
| 64219 | PJA1     | 126070 | ZNF440        | S |
| 64225 | ARL6IP2  | 84100  | ARL6          | L |
| 64240 | ABCG5    | 64241  | ABCG8         | L |
| 64375 | ZNFN1A4  | 64376  | ZNFN1A5       | L |
| 64403 | CDH24    | 84988  | PPP1R16A      | S |
| 64746 | ACBD3    | 64750  | SMURF2        | L |
| 64750 | SMURF2   | 135932 | FLJ90586      | L |
| 64750 | SMURF2   | 404093 | CUEDC1        | L |
| 64753 | NAG6     | 79797  | ZNF408        | L |
| 64769 | C1orf149 | 83746  | L3MBTL2       | R |
| 64965 | MRPS9    | 83759  | RBM30         | S |
| 65220 | NADK     | 79873  | NUDT18        | R |
| 65220 | NADK     | 84708  | LNX           | R |
| 65264 | FLJ13855 | 79666  | PLEKHF2       | R |
| 65989 | EGFL9    | 83755  | KRTAP4-12     | R |
| 65991 | FUNDC2   | 84164  | ASCC2         | S |
| 73710 | (null)   | 79020  | C7orf25       | S |
| 78987 | CRELD1   | 222019 | (null)        | S |
| 78992 | YIPF2    | 286451 | YIPF6         | R |
| 79020 | C7orf25  | 118924 | C10orf4       | S |
| 79020 | C7orf25  | 162952 | (null)        | S |
| 79020 | C7orf25  | 284004 | FLJ23825      | S |
| 79027 | ZNF655   | 83755  | KRTAP4-12     | R |
| 79036 | MGC2749  | 79873  | NUDT18        | R |
| 79036 | MGC2749  | 80125  | FLJ32855      | R |
| 79036 | MGC2749  | 80254  | Cep63         | R |
| 79036 | MGC2749  | 81631  | MAP1LC3B      | R |
| 79036 | MGC2749  | 84289  | ING5          | R |
| 79036 | MGC2749  | 84708  | LNX           | R |
| 79036 | MGC2749  | 84984  | MGC14126      | R |
| 79036 | MGC2749  | 90410  | IFT20         | R |
| 79036 | MGC2749  | 138065 | RNF183        | R |
| 79036 | MGC2749  | 164127 | C1orf65       | R |
| 79036 | MGC2749  | 220766 | KIAA0470L     | R |
| 79050 | NOC4L    | 81628  | TSC22D4       | R |
| 79050 | NOC4L    | 83878  | USHBP1        | R |
| 79077 | XTP3TPA  | 84273  | C4orf14       | S |
| 79088 | ZNF426   | 80321  | Cep70         | R |
| 79088 | ZNF426   | 83755  | KRTAP4-12     | R |
| 79094 | MGC4504  | 84528  | PEPP-2        | R |
| 79096 | MGC4707  | 84060  | DKFZP564O0523 | S |
| 79142 | PHF23    | 90678  | LRSAM1        | S |
| 79159 | MGC3731  | 150421 | (null)        | S |
| 79172 | MGC11266 | 220766 | KIAA0470L     | R |
| 79173 | MGC11271 | 148223 | C19orf25      | R |
| 79187 | FSD1     | 84988  | PPP1R16A      | S |
| 79363 | C1orf89  | 80199  | FLJ22688      | R |
| 79434 | (null)   | 93145  | OLFM2         | S |
| 79571 | GCC1     | 79869  | FLJ12529      | R |
| 79571 | GCC1     | 83878  | USHBP1        | R |

|       |           |        |               |    |
|-------|-----------|--------|---------------|----|
| 79571 | GCC1      | 85302  | FBF1          | R  |
| 79576 | NKAP      | 80321  | Cep70         | R  |
| 79576 | NKAP      | 220108 | FLJ30707      | R  |
| 79586 | CHPF      | 118460 | EXOSC6        | L  |
| 79637 | ARMC7     | 253980 | KCTD13        | R  |
| 79679 | VTCN1     | 151888 | BTLA          | L  |
| 79686 | C14orf139 | 84078  | KBTBD7        | S  |
| 79723 | SUV39H2   | 288353 | (null)        | S  |
| 79734 | KCTD17    | 79873  | NUDT18        | R  |
| 79734 | KCTD17    | 84708  | LNX           | R  |
| 79734 | KCTD17    | 201965 | RWDD4A        | R  |
| 79734 | KCTD17    | 474354 | LRRC18        | R  |
| 79735 | TBC1D17   | 84164  | ASCC2         | S  |
| 79753 | SNIP1     | 84186  | ZCCHC7        | L  |
| 79753 | SNIP1     | 204851 | HIPK1         | L  |
| 79756 | (null)    | 84060  | DKFZP564O0523 | S  |
| 79760 | GEMIN7    | 79833  | GEMIN6        | RL |
| 79797 | ZNF408    | 80321  | Cep70         | R  |
| 79797 | ZNF408    | 83755  | KRTAP4-12     | R  |
| 79797 | ZNF408    | 127557 | ZBTB8         | R  |
| 79797 | ZNF408    | 138046 | LOC138046     | R  |
| 79801 | SHCBP1    | 221302 | C6orf113      | R  |
| 79873 | NUDT18    | 83755  | KRTAP4-12     | R  |
| 79873 | NUDT18    | 92610  | TIFA          | R  |
| 79873 | NUDT18    | 115704 | EVI5L         | R  |
| 79873 | NUDT18    | 253980 | KCTD13        | R  |
| 79912 | FLJ22028  | 139596 | RP11-311P8.3  | R  |
| 80022 | MYO15B    | 127557 | ZBTB8         | R  |
| 80028 | FBXL18    | 83755  | KRTAP4-12     | R  |
| 80125 | FLJ32855  | 81628  | TSC22D4       | R  |
| 80125 | FLJ32855  | 83878  | USHBP1        | R  |
| 80125 | FLJ32855  | 127557 | ZBTB8         | R  |
| 80174 | DRF1      | 83755  | KRTAP4-12     | R  |
| 80198 | MUS81     | 146956 | EME1          | L  |
| 80254 | Cep63     | 83878  | USHBP1        | R  |
| 80306 | MED28     | 83878  | USHBP1        | R  |
| 80321 | Cep70     | 84080  | C16orf48      | R  |
| 80321 | Cep70     | 127557 | ZBTB8         | R  |
| 80321 | Cep70     | 284058 | LOC284058     | R  |
| 80351 | TNKS2     | 85456  | TNKS1BP1      | L  |
| 80723 | TMEM22    | 116983 | CENTB5        | S  |
| 80764 | THAP7     | 83755  | KRTAP4-12     | R  |
| 80764 | THAP7     | 541468 | C1orf190      | R  |
| 80817 | KIAA1712  | 220082 | NURIT         | R  |
| 81488 | GRINL1A   | 83759  | RBM30         | S  |
| 81488 | GRINL1A   | 112840 | C14orf150     | S  |
| 81605 | C9orf74   | 84164  | ASCC2         | S  |
| 81620 | CDT1      | 115106 | CCDC5         | L  |
| 81628 | TSC22D4   | 84080  | C16orf48      | R  |
| 81628 | TSC22D4   | 84708  | LNX           | R  |
| 81628 | TSC22D4   | 122786 | FRMD6         | R  |
| 81628 | TSC22D4   | 134510 | UBLCP1        | R  |
| 81628 | TSC22D4   | 146849 | FLJ32734      | R  |
| 81631 | MAP1LC3B  | 84078  | KBTBD7        | S  |
| 83552 | MFRP      | 114902 | C1QTNF5       | L  |
| 83640 | MGC2560   | 84528  | PEPP-2        | R  |
| 83755 | KRTAP4-12 | 83897  | KRTAP3-2      | R  |
| 83755 | KRTAP4-12 | 84707  | BEX2          | R  |
| 83755 | KRTAP4-12 | 84708  | LNX           | R  |
| 83755 | KRTAP4-12 | 84733  | CBX2          | R  |
| 83755 | KRTAP4-12 | 84894  | LRRN6A        | R  |
| 83755 | KRTAP4-12 | 90594  | ZNF439        | R  |
| 83755 | KRTAP4-12 | 92595  | MGC13138      | R  |
| 83755 | KRTAP4-12 | 117144 | CATSPER1      | R  |
| 83755 | KRTAP4-12 | 126070 | ZNF440        | R  |
| 83755 | KRTAP4-12 | 143684 | FAM76B        | R  |
| 83755 | KRTAP4-12 | 147687 | ZNF417        | R  |



|        |               |        |           |   |
|--------|---------------|--------|-----------|---|
| 83755  | KRTAP4-12     | 164127 | C1orf65   | R |
| 83755  | KRTAP4-12     | 164592 | FLJ36046  | R |
| 83755  | KRTAP4-12     | 286301 | MGC42630  | R |
| 83755  | KRTAP4-12     | 414157 | C10orf62  | R |
| 83878  | USHBP1        | 85302  | FBF1      | R |
| 83878  | USHBP1        | 89885  | FATE1     | R |
| 83878  | USHBP1        | 90060  | JM11      | R |
| 83878  | USHBP1        | 127703 | FLJ38984  | R |
| 83878  | USHBP1        | 143241 | DYDC1     | R |
| 83878  | USHBP1        | 149371 | EXOC8     | R |
| 83878  | USHBP1        | 284058 | LOC284058 | R |
| 83988  | NCALD         | 113878 | DTX2      | R |
| 84026  | (null)        | 114034 | TOE1      | S |
| 84062  | DTNBP1        | 85359  | DGCR6L    | R |
| 84067  | DKFZP566M1046 | 92840  | C19orf32  | R |
| 84141  | FLJ13391      | 222019 | (null)    | S |
| 84224  | AE2           | 116461 | C1orf19   | R |
| 84277  | WBSCR18       | 118460 | EXOSC6    | L |
| 84289  | ING5          | 89797  | NAV2      | R |
| 84313  | VPS25         | 84528  | PEPP-2    | R |
| 84445  | LZTS2         | 84528  | PEPP-2    | R |
| 84528  | PEPP-2        | 85302  | FBF1      | R |
| 84528  | PEPP-2        | 113878 | DTX2      | R |
| 84528  | PEPP-2        | 114823 | LENG8     | R |
| 84528  | PEPP-2        | 115572 | FAM46B    | R |
| 84528  | PEPP-2        | 129807 | NEU4      | R |
| 84528  | PEPP-2        | 169966 | FAM46D    | R |
| 84661  | LOC84661      | 143241 | DYDC1     | R |
| 84675  | TRIM55        | 84676  | TRIM63    | L |
| 84680  | PHACS         | 85302  | FBF1      | R |
| 84699  | CREB3L3       | 90993  | CREB3L1   | L |
| 84699  | CREB3L3       | 148327 | CREB3L4   | L |
| 84708  | LNX           | 92610  | TIFA      | R |
| 84708  | LNX           | 127557 | ZBTB8     | R |
| 84708  | LNX           | 253980 | KCTD13    | R |
| 84708  | LNX           | 286514 | MAGEB18   | R |
| 84888  | SPPL2A        | 92856  | IMP4      | L |
| 84970  | C1orf94       | 93487  | C14orf32  | R |
| 84978  | FRMD5         | 284169 | (null)    | S |
| 84988  | PPP1R16A      | 359845 | MGC45871  | S |
| 85302  | FBF1          | 90410  | IFT20     | R |
| 85359  | DGCR6L        | 283518 | KCNRG     | R |
| 85439  | STN2          | 127833 | SYT2      | L |
| 89885  | FATE1         | 138065 | RNF183    | R |
| 90060  | JM11          | 220766 | KIAA0470L | R |
| 90427  | BMF           | 140735 | Dic2      | L |
| 90933  | TRIM41        | 127557 | ZBTB8     | R |
| 90993  | CREB3L1       | 148327 | CREB3L4   | L |
| 91056  | DKFZp761E198  | 283518 | KCNRG     | R |
| 91544  | UBXD5         | 154313 | C6orf165  | R |
| 91754  | NEK9          | 140609 | NEK7      | L |
| 92822  | ZFP276        | 127557 | ZBTB8     | R |
| 93986  | FOXP2         | 116113 | FOXP4     | L |
| 112869 | LOC112869     | 339965 | FLJ25770  | R |
| 112950 | MED8          | 124402 | LOC124402 | S |
| 113878 | DTX2          | 222546 | RFXDC1    | R |
| 114088 | TRIM9         | 158345 | LOC158345 | S |
| 116225 | ZMYND19       | 253980 | KCTD13    | R |
| 116225 | ZMYND19       | 284352 | LOC284352 | R |
| 118460 | EXOSC6        | 196513 | DCP1B     | L |
| 121536 | AEBP2         | 138046 | LOC138046 | R |
| 127703 | FLJ38984      | 220766 | KIAA0470L | R |
| 128240 | APOA1BP       | 284169 | (null)    | S |
| 138046 | LOC138046     | 220766 | KIAA0470L | R |
| 148223 | C19orf25      | 220766 | KIAA0470L | R |
| 153733 | MGC39633      | 374618 | TEX9      | R |
| 153733 | MGC39633      | 541468 | C1orf190  | R |

|        |          |        |           |   |
|--------|----------|--------|-----------|---|
| 162952 | (null)   | 196383 | MGC7036   | S |
| 162952 | (null)   | 234729 | (null)    | S |
| 163702 | IL28RA   | 282616 | IL28A     | L |
| 163702 | IL28RA   | 282617 | IL28B     | L |
| 163702 | IL28RA   | 282618 | IL29      | L |
| 164127 | C1orf65  | 541468 | C1orf190  | R |
| 167227 | DGP2     | 196513 | DGP1B     | L |
| 170082 | MGC17403 | 541468 | C1orf190  | R |
| 196383 | MGC7036  | 284004 | FLJ23825  | S |
| 220134 | C18orf24 | 256369 | C14orf48  | R |
| 222389 | C10orf30 | 284352 | LOC284352 | R |
