# Supplementary material
Source: PubMed Central journal article supplement (PMC1885563)
Supplement: pnas_0701361104_14.pdf [file pnas_0701361104_14.pdf]

Table 5. **Summary of the significance analysis for Fig. 4a, c-h** Fields in red denote significant positive trends, and those in blue do significant negative trends.

| Panel | $A_0$   | Z-score | P-value               |
|-------|---------|---------|-----------------------|
| 4a    | 0.040   | 8.4     | $1.6 \times 10^{-17}$ |
| 4c    | 0.092   | 8.6     | $1.3 \times 10^{-17}$ |
| 4d    | 0.0088  | 2.1     | 0.015                 |
| 4e    | 0.49    | 3.6     | $1.7 \times 10^{-4}$  |
| 4f    | -0.23   | -5.4    | $2.6 \times 10^{-8}$  |
| 4g    | 0.0064  | 8.1     | $2.8 \times 10^{-16}$ |
| 4h    | -0.0010 | -4.7    | $1.4 \times 10^{-6}$  |
