# Supplementary material
Source: PubMed Central journal article supplement (PMC1885563)

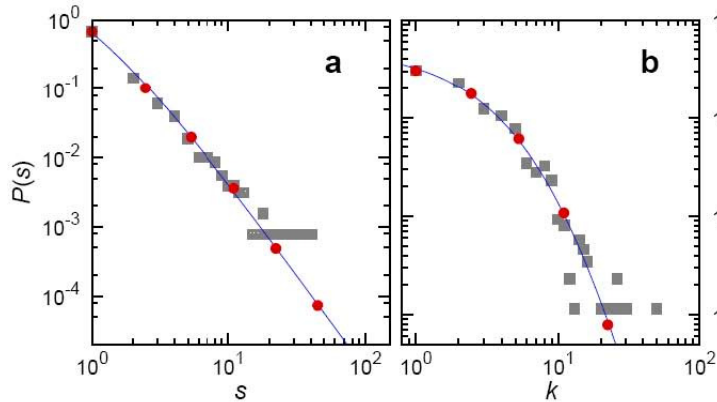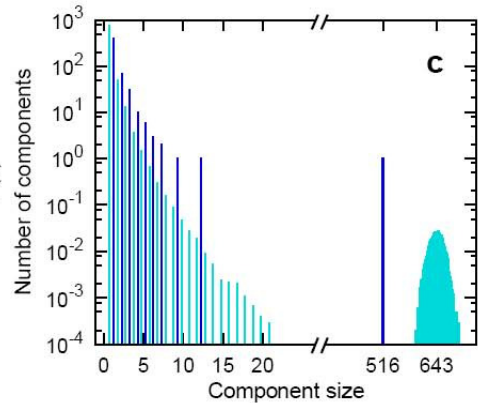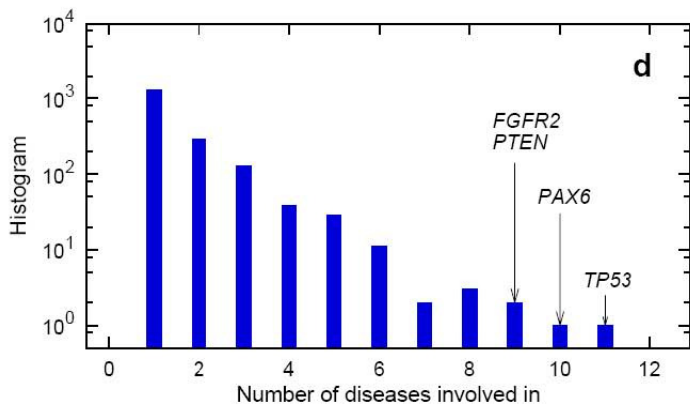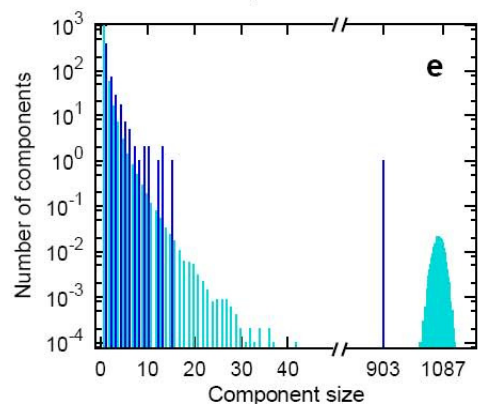

Supplement: pnas_0701361104_2.pdf [file pnas_0701361104_2.pdf]

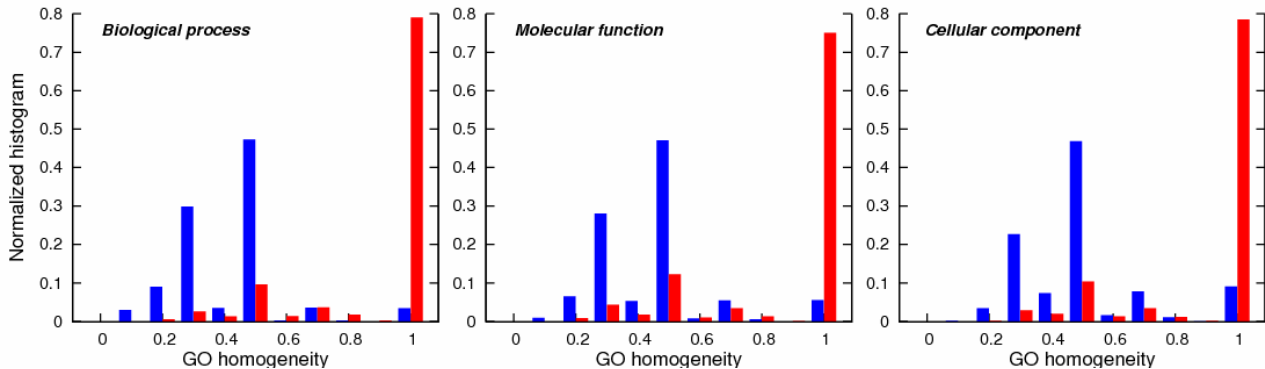

Supplement: pnas_0701361104_4.pdf [file pnas_0701361104_4.pdf]

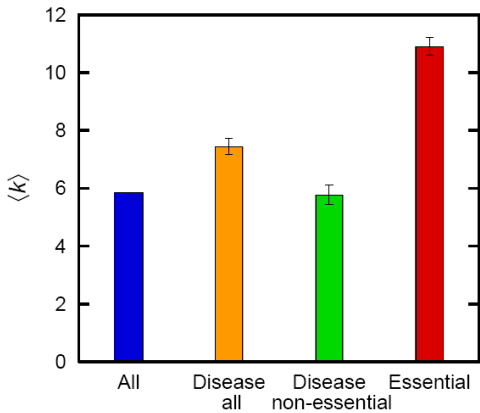

Supplement: pnas_0701361104_5.pdf [file pnas_0701361104_5.pdf]

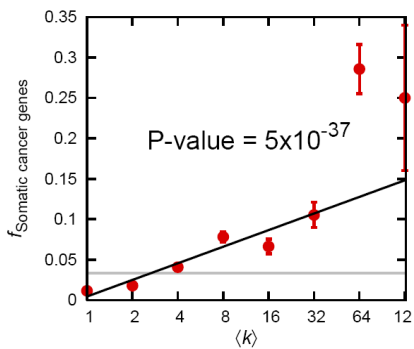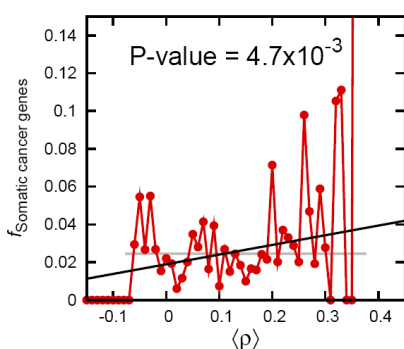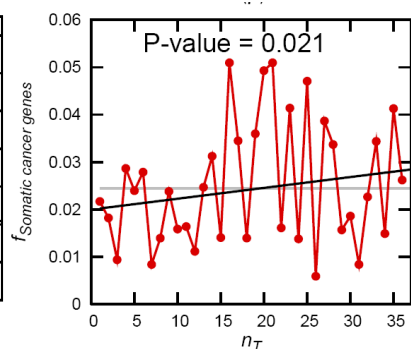

Supplement: pnas_0701361104_6.pdf [file pnas_0701361104_6.pdf]

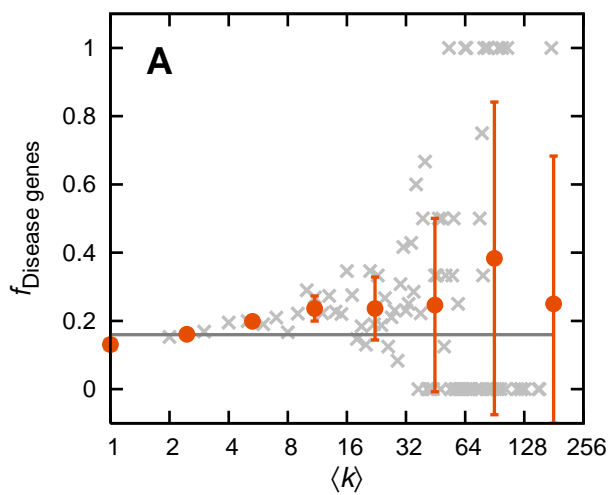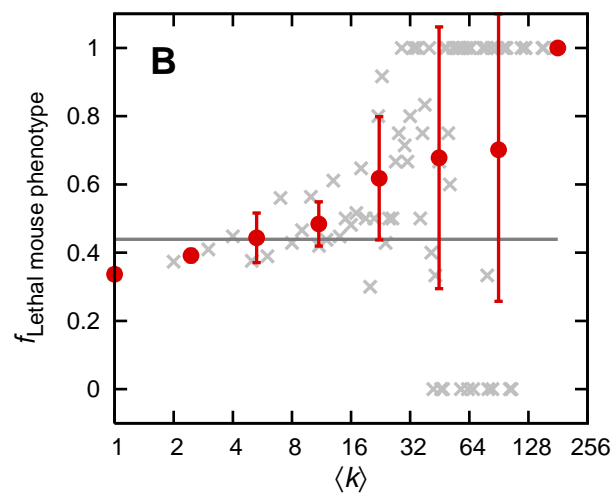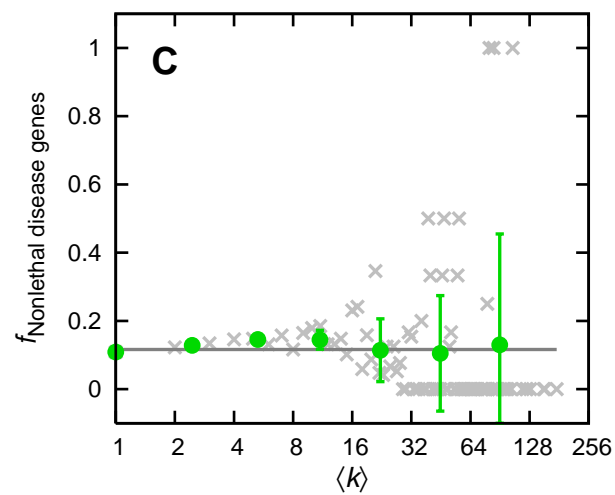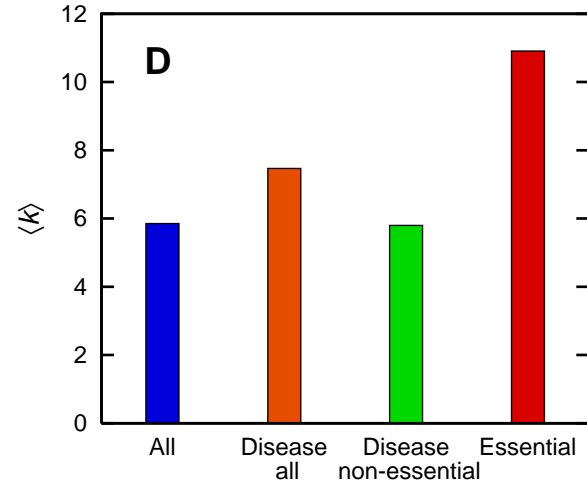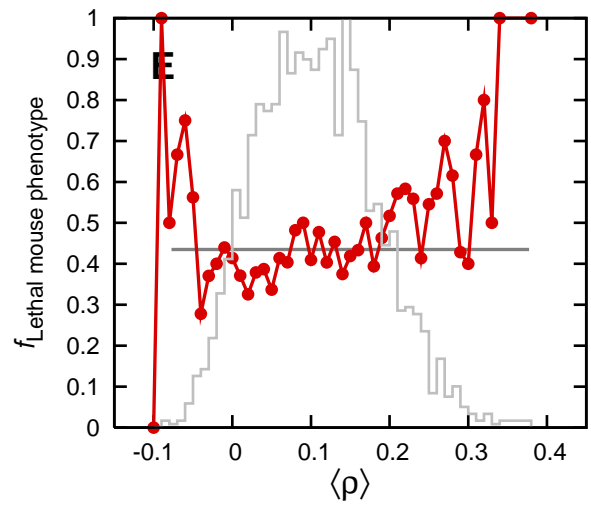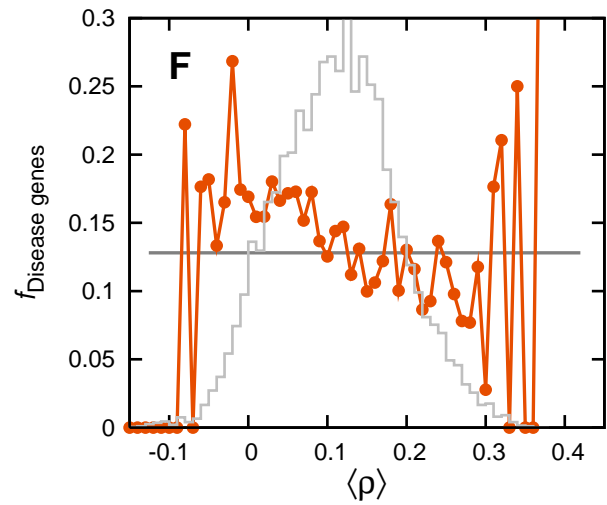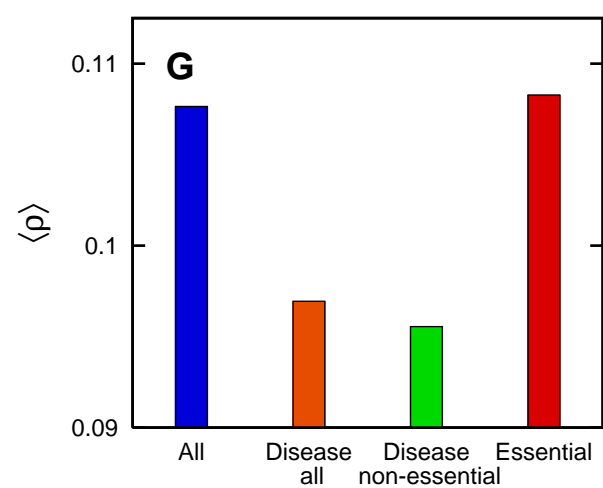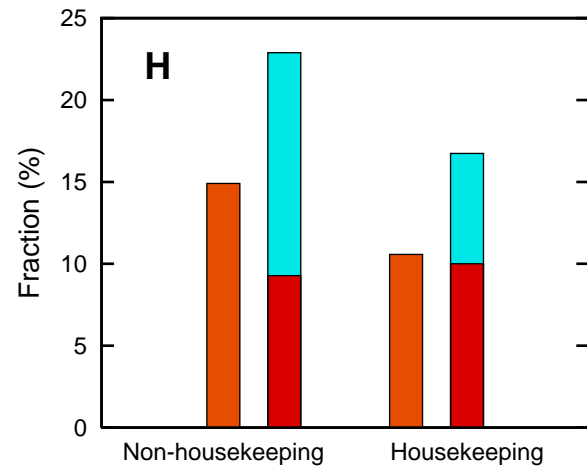

Supplement: pnas_0701361104_8.pdf [file pnas_0701361104_8.pdf]
